# Supplementary material for: Reactive oxygen species-related genes participate in resistance to cucumber green mottle mosaic virus infection regulated by boron in Nicotiana benthamiana and watermelon
Source: Front Plant Sci. 2022 Nov 11;13:1027404. doi: 10.3389/fpls.2022.1027404 (PMC9691971; doi:10.3389/fpls.2022.1027404)
Supplement: Supplementary file 2 [file Table_1.xlsx]

## Sheet: Sheet1
Supplementary Table 1. Specific primers used for qPCR and VIGS assays.
Primers used for qPCR assays.
Gene ID	Gene description	Gene abbreviation	Primer name	Primer sequences
Niben101Ctg10591g00003	catalase isozyme 1	NbCat1	Cat1+	ATGGACGGTTCTGGTG
			Cat1-	GTGGCTGTGATTTGCTC
Niben101Scf16254g00008	inositol-3-phosphate synthase	NbIPS	IPS+	TGGCTACCATCCTCAG
			IPS-	AGTCCTTCCCTTTCTTA
Niben101Scf00897g03002	probable glutathione S-transferase	NbGST	GST+	ATGGTTTCCTGCCTAT
			GST-	CCACTCTAAATCCGTC
Niben101Scf01685g09002	calcium-binding protein PBP1-like	NbCAM	CAM+	AACAGCATCCCCATT
			CAM-	TCACCTAGTTGGATTA
Niben101Scf01752g05003	ethylene-responsive transcription factor 3-like	NbERF3	ERF3+	CTTTACCACCGTATTCTCA
			ERF3-	AACACCGTCGTTTGCT
Niben101Scf00726g02017	GDP-L-galactose phosphorylase 1-like	NbGGP1	GGP1+	AAGGCACCTCAAGAAGA
			GGP1-	TGATGGCAACGACACT
Niben101Scf01696g06050	GDP-mannose 3,5-epimerase 1-like	NbGME1	GME1+	AATAAACGGGTGGTCT
			GME1-	GAGTGAGGCAGTGGAG
Niben101Scf06385g02016	peroxiredoxin Q, chloroplastic-like	NbPrx Q	Prx Q+	CAGTGCCTCCACCATT
			Prx Q-	CATCAGCAGGATAGAAATAA
Niben101Scf01372g00003	2-Cys peroxiredoxin BAS1, chloroplastic-like	NbBAS1	BAS1+	AGTCGCTGCTTTGAGA
			BAS1-	GAATAATACTTACCCATCCT
Niben101Scf03865g00006	phospholipase D delta-like	NbPLD-delta	PLD-delta+	AAACCCTGCTTCCTCA
			PLD-delta-	GTGCCTGTCTTATTGC
AY179605.1	Nicotiana benthamiana actin gene	NbActin	Actin+	CCGTGGAGAAGAGCTACGAG
			Actin-	CAGCAGCTTCCATTCCGATC
Primers used for TRV-based VIGS assays in Nicotiana benthamiana.
Gene ID	Gene description	Gene abbreviation	Fragment size	Primer name	Primer sequences
Niben101Ctg10591g00003	catalase isozyme 1	NbCat1	221bp	TRV-Cat1+	AGAAGGCCTCCATGGGGATCCTTTCCCAGTCTTGTTGA
				TRV-Cat1-	GGGACATGCCCGGGCCTCGAGTCCGTGATGGAATGAA
Niben101Scf16254g00008	inositol-3-phosphate synthase	NbIPS	361bp	TRV-IPS+	AGAAGGCCTCCATGGGGATCCGTTTACTCATAGCGTGTT
				TRV-IPS-	GGGACATGCCCGGGCCTCGAGCCTTATCTTTGGTGGC
Niben101Scf00897g03002	probable glutathione S-transferase	NbGST	245bp	TRV-GST+	AGAAGGCCTCCATGGGGATCCTCAGGGTCAGCAAGAG
				TRV-GST-	GGGACATGCCCGGGCCTCGAGGAAGCAGCCAATAAAG
Niben101Scf01685g09002	calcium-binding protein PBP1-like	NbCAM	221bp	TRV-CAM+	AGAAGGCCTCCATGGGGATCCGTAACGGGTTTCAGC
				TRV-CAM-	GGGACATGCCCGGGCCTCGAGATCTTCAGATTCTTCCA
Niben101Scf01752g05003	ethylene-responsive transcription factor 3-like	NbERF3	260bp	TRV-ERF3+	AGAAGGCCTCCATGGGGATCCCTTTACCACCGTATTCTCA
				TRV-ERF3-	GGGACATGCCCGGGCCTCGAGCGCCGTCTTCAACAAC
Niben101Scf00726g02017	GDP-L-galactose phosphorylase 1-like	NbGGP1	376bp	TRV-GGP1+	AGAAGGCCTCCATGGGGATCCTTGGTCAGGAGGAGTTG
				TRV-GGP1-	GGGACATGCCCGGGCCTCGAGATCACGCCAGCATCAG
Niben101Scf01696g06050	GDP-mannose 3,5-epimerase 1-like	NbGME1	251bp	TRV-GME1+	AGAAGGCCTCCATGGGGATCCTTTCCATCAGCAGCAC
				TRV-GME1-	GGGACATGCCCGGGCCTCGAGCCCATCCACCACATTC
Niben101Scf06385g02016	peroxiredoxin Q, chloroplastic-like	NbPrx Q	317bp	TRV-Prx Q+	AGAAGGCCTCCATGGGGATCCCCCCATTTCTCATAACC
				TRV-Prx Q-	GGGACATGCCCGGGCCTCGAGCAGCTCCTGCTTTCTT
Niben101Scf03865g00006	phospholipase D delta-like	NbPLD-delta	271bp	TRV-PLD-delta+	AGAAGGCCTCCATGGGGATCCTTAGAAAGCTGGAAGAGT
				TRV-PLD-delta-	GGGACATGCCCGGGCCTCGAGGGCAAGTTAGACGATT
MN443913.1	green fluorescent protein	GFP	311bp	GFP+	AGAAGGCCTCCATGGGGATCCCACCTTGATGCCGTTCTT
				GFP-	GGGACATGCCCGGGCCTCGAGTCGTGACCACCCTGACC
Niben101Scf14708g00023	15-cis-phytoene desaturase, chloroplastic/chromoplastic	NbPDS	409bp	TRV-PDS+	AGAAGGCCTCCATGGGGATCCGGCACTTAACTTCATA
				TRV-PDS-	GGGACATGCCCGGGCCTCGAGCTTCAGTTTTCTGTCA
Primers used for CGMMV-based VIGS assays in watermelon.
Gene ID	Gene description	Gene abbreviation	Fragment size	Primer name	Primer sequences
Cla021932	catalase	ClaCat	358bp	P190-Cat+	CCCGTCAGGACTTTACTTAATGGATCCAGCCTTCTGTCTTTCGC
				P190-Cat-	CGACCTAGACCTATAACTGGATCCGCAACGGTATCACATCCT
Cla014674	probable glutathione S-transferase	ClaGST	215bp	P190-GST+	CCCGTCAGGACTTTACTTAATGGATCCTTCTACCTCCGTCGTT
				P190-GST-	CGACCTAGACCTATAACTGGATCCAGATGGCACCTTGTTT
Cla005003	Calmodulin-like protein 1	ClaCAM	169bp	P190-CAM+	CCCGTCAGGACTTTACTTAATGGATCCTTTCTTCAAGCCTAACTCCA
				P190-CAM-	CGACCTAGACCTATAACTGGATCCCAGCATCATCGCAACCT
Cla017646	Peroxiredoxin	ClaPrx	274bp	P190-Prx+	CCCGTCAGGACTTTACTTAATGGATCCTGCGTGGGTCCAAACT
				P190-Prx-	CGACCTAGACCTATAACTGGATCCAGCAGGGCAGACTTCG
Cla010898	Phytoene desaturase	ClaPDS	300bp	P190-PDS+	CCCGTCAGGACTTTACTTAATGGATCCTTTGGGGCTTATCCCAA
				P190-PDS-	CGACCTAGACCTATAACTGGATCCTCTCATCCACTCTTGC
MN443913.1	green fluorescent protein	GFP	263bp	PV190-GFP+	AGGACTTTACTTAATGGATCCTGCTTCAGCCGCTACCC
				PV190-GFP-	CCTAGACCTATAACTGGATCCTGCTTGTCGGCCATGATAT
Primers used for detecting silencing efficiencies in Nicotiana benthamiana.
Gene ID	Gene description	Gene abbreviation	Primer name	Primer sequences
Niben101Ctg10591g00003	catalase isozyme 1	NbCat1	q-NbCat1+	ATGGACGGTTCTGGTG
			q-NbCat1-	GTGGCTGTGATTTGCTC
Niben101Scf16254g00008	inositol-3-phosphate synthase	NbIPS	q-NbIPS+	TGGCTACCATCCTCAG
			q-NbIPS-	AGTCCTTCCCTTTCTTA
Niben101Scf00897g03002	probable glutathione S-transferase	NbGST	q-NbGST+	ATGGTTTCCTGCCTAT
			q-NbGST-	CCACTCTAAATCCGTC
Niben101Scf01685g09002	calcium-binding protein PBP1-like	NbCAM	q-NbCAM+	AACAGCATCCCCATT
			q-NbCAM-	TCACCTAGTTGGATTA
Niben101Scf01752g05003	ethylene-responsive transcription factor 3-like	NbERF3	q-NbERF3+	CTTTACCACCGTATTCTCA
			q-NbERF3-	AACACCGTCGTTTGCT
Niben101Scf00726g02017	GDP-L-galactose phosphorylase 1-like	NbGGP1	q-NbGGP1+	AAGGCACCTCAAGAAGA
			q-NbGGP1-	TGATGGCAACGACACT
Niben101Scf01696g06050	GDP-mannose 3,5-epimerase 1-like	NbGME1	q-NbGME1+	AATAAACGGGTGGTCT
			q-NbGME1-	GAGTGAGGCAGTGGAG
Niben101Scf06385g02016	peroxiredoxin Q, chloroplastic-like	NbPrx Q	q-NbPrx Q+	CAGTGCCTCCACCATT
			q-NbPrx Q-	CATCAGCAGGATAGAAATAA
Niben101Scf03865g00006	phospholipase D delta-like	NbPLD-delta	q-NbPLD-delta+	AAACCCTGCTTCCTCA
			q-NbPLD-delta-	GTGCCTGTCTTATTGC
Primers used for detecting silencing efficiencies in watermelon.
Gene ID	Gene description	Gene abbreviation	Primer name	Primer sequences
Cla021932	catalase	ClaCat	q-Cat+	TTGAACCGTTAGATACCA
			q-Cat-	AGGACATTTAGGAGCATT
Cla014674	probable glutathione S-transferase	ClaGST	q-GST+	ATGGGAAAGTTATTGG
			q-GST-	AAGCTACTGCGATGTT
Cla005003	Calmodulin-like protein 1	ClaCAM	q-CAM+	AGGTTGCGATGATGCTG
			q-CAM-	CACCGCTCGTCTCCAA
Cla017646	Peroxiredoxin	ClaPrx	q-Prx+	TCTCCAAGCCTTACAATACG
			q-Prx-	TGTGGCTAAGATTCCAAAGT
Cla007792	ACTIN gene	ACTIN	q-Actin+	GTATCGCTGACCGTATGAG
			q-Actin-	CTCCAATCCAGACACTGTATT
KC851866.1	Cucumber green mottle mosaic virus isolate hn	CGMMV-hn	CGMMV-hn-165+	CCTAGCAATCCCACGAC
			CGMMV-hn-165-	TGACCAGACTACCGAAAA
