# Supplementary material for: Reactive oxygen species-related genes participate in resistance to cucumber green mottle mosaic virus infection regulated by boron in Nicotiana benthamiana and watermelon
Source: Front Plant Sci. 2022 Nov 11;13:1027404. doi: 10.3389/fpls.2022.1027404 (PMC9691971; doi:10.3389/fpls.2022.1027404)
Supplement: Supplementary file 3 [file Table_2.xlsx]

## Sheet: Sheet1
Supplementary Table 2. Summary of sequencing reads after filtering.
Samples	Clean reads	Clean bases	GC Content	Q30
P+B-1	23365526	6986630642	0.4383	0.9422
P+B-2	21717174	6496627088	0.4389	0.9378
P+B-3	22137050	6587044304	0.4378	0.9374
C+H-1	23430317	7003036230	0.4387	0.9354
C+H-2	20725173	6194392798	0.4374	0.9421
C+H-3	27633477	8258688498	0.437	0.9418
C+B-1	19890648	5954619032	0.4343	0.9371
C+B-2	19364594	5786378628	0.4378	0.9436
C+B-3	22006605	6583269194	0.4376	0.9426
P+H-1	19465136	5816640994	0.441	0.9418
P+H-2	24065298	7191186078	0.4396	0.9433
P+H-3	22592137	6755757772	0.4413	0.9376
note: P+H, PBS solution + H2O; P+B, PBS solution + boron; C+H, CGMMV + H2O; C+B, CGMMV + boron.
