# Supplementary material for: Reactive oxygen species-related genes participate in resistance to cucumber green mottle mosaic virus infection regulated by boron in Nicotiana benthamiana and watermelon
Source: Front Plant Sci. 2022 Nov 11;13:1027404. doi: 10.3389/fpls.2022.1027404 (PMC9691971; doi:10.3389/fpls.2022.1027404)
Supplement: Supplementary file 4 [file Table_3.xlsx]

## Sheet: Sheet1
Supplementary Table 3. Reads mapped onto the N. benthamiana reference genome.
BMK-ID	Total Reads	Mapped Reads	Unique Mapped Reads	Multiple Map Reads	Reads Map to '+'	Reads Map to '-'
P+B-1	46731052	44,615,095 (95.47%)	40,633,624 (86.95%)	3,981,471 (8.52%)	21,325,783 (45.64%)	21,647,817 (46.32%)
P+B-2	43434348	41,386,007 (95.28%)	37,638,962 (86.66%)	3,747,045 (8.63%)	19,722,968 (45.41%)	20,046,345 (46.15%)
P+B-3	44274100	41,784,402 (94.38%)	37,905,983 (85.62%)	3,878,419 (8.76%)	19,825,324 (44.78%)	20,193,298 (45.61%)
C+H-1	46860634	44,663,106 (95.31%)	40,981,519 (87.45%)	3,681,587 (7.86%)	21,455,618 (45.79%)	21,731,605 (46.37%)
C+H-2	41450346	39,396,595 (95.05%)	36,204,274 (87.34%)	3,192,321 (7.70%)	18,969,243 (45.76%)	19,160,131 (46.22%)
C+H-3	55266954	52,726,172 (95.40%)	48,577,765 (87.90%)	4,148,407 (7.51%)	25,442,970 (46.04%)	25,686,274 (46.48%)
C+B-1	39781296	37,905,189 (95.28%)	35,027,547 (88.05%)	2,877,642 (7.23%)	18,334,238 (46.09%)	18,519,190 (46.55%)
C+B-2	38729188	36,910,568 (95.30%)	33,971,549 (87.72%)	2,939,019 (7.59%)	17,789,269 (45.93%)	17,998,371 (46.47%)
C+B-3	44013210	41,943,317 (95.30%)	38,576,433 (87.65%)	3,366,884 (7.65%)	20,189,492 (45.87%)	20,435,810 (46.43%)
P+H-1	38930272	37,255,932 (95.70%)	33,695,550 (86.55%)	3,560,382 (9.15%)	17,644,771 (45.32%)	17,993,439 (46.22%)
P+H-2	48130596	46,028,233 (95.63%)	41,927,598 (87.11%)	4,100,635 (8.52%)	21,977,584 (45.66%)	22,327,251 (46.39%)
P+H-3	45184274	43,188,330 (95.58%)	39,268,656 (86.91%)	3,919,674 (8.67%)	20,576,711 (45.54%)	20,934,023 (46.33%)
note: P+H, PBS solution + H2O; P+B, PBS solution + boron; C+H, CGMMV + H2O; C+B, CGMMV + boron.
