# Supplementary material for: Reactive oxygen species-related genes participate in resistance to cucumber green mottle mosaic virus infection regulated by boron in Nicotiana benthamiana and watermelon
Source: Front Plant Sci. 2022 Nov 11;13:1027404. doi: 10.3389/fpls.2022.1027404 (PMC9691971; doi:10.3389/fpls.2022.1027404)
Supplement: Supplementary file 5 [file Table_4.xlsx]

## Sheet: Sheet1
Supplementary Table 4. All DEGs identified in this study.
#Gene ID	Gene_name	P+B-1	P+B-2	P+B-3	C+H-1	C+H-2	C+H-3	C+B-1	C+B-2	C+B-3	P+H-1	P+H-2	P+H-3	P+B-1_P+B-2_P+B-3_vs_C+B-1_C+B-2_C+B-3_DESeq2_FDR	P+B-1_P+B-2_P+B-3_vs_C+B-1_C+B-2_C+B-3_DESeq2_log2FC	P+B-1_P+B-2_P+B-3_vs_C+B-1_C+B-2_C+B-3_DESeq2_(FDR_0.05_FC_2)_regulated	C+H-1_C+H-2_C+H-3_vs_C+B-1_C+B-2_C+B-3_DESeq2_FDR	C+H-1_C+H-2_C+H-3_vs_C+B-1_C+B-2_C+B-3_DESeq2_log2FC	C+H-1_C+H-2_C+H-3_vs_C+B-1_C+B-2_C+B-3_DESeq2_(FDR_0.05_FC_2)_regulated	P+H-1_P+H-2_P+H-3_vs_P+B-1_P+B-2_P+B-3_DESeq2_FDR	P+H-1_P+H-2_P+H-3_vs_P+B-1_P+B-2_P+B-3_DESeq2_log2FC	P+H-1_P+H-2_P+H-3_vs_P+B-1_P+B-2_P+B-3_DESeq2_(FDR_0.05_FC_2)_regulated	P+H-1_P+H-2_P+H-3_vs_C+H-1_C+H-2_C+H-3_DESeq2_FDR	P+H-1_P+H-2_P+H-3_vs_C+H-1_C+H-2_C+H-3_DESeq2_log2FC	P+H-1_P+H-2_P+H-3_vs_C+H-1_C+H-2_C+H-3_DESeq2_(FDR_0.05_FC_2)_regulated	P+H-1_P+H-2_P+H-3_vs_C+B-1_C+B-2_C+B-3_DESeq2_FDR	P+H-1_P+H-2_P+H-3_vs_C+B-1_C+B-2_C+B-3_DESeq2_log2FC	P+H-1_P+H-2_P+H-3_vs_C+B-1_C+B-2_C+B-3_DESeq2_(FDR_0.05_FC_2)_regulated	COG_class	COG_class_annotation	GO_annotation	KEGG_annotation	KEGG_pathway_annotation	KOG_class	KOG_class_annotation	Pfam_annotation	Swiss_Prot_annotation	eggNOG_class	eggNOG_class_annotation	NR_annotation	GO_second_level_annotation
Niben101Ctg03201g00001	Niben101Ctg03201g00001	2.10425	1.10591	1.79421	1.15626	2.65012	2.36659	6.55177	5.0484	4.7253	1.89424	3.44666	1.9589	0.004945	1.03212	up	0.006318	1.127	up	--	--	--	--	--	--	0.100566	0.650587	normal	--	--	Molecular Function: transcription factor activity, sequence-specific DNA binding (GO:0003700);; Cellular Component: nucleus (GO:0005634);; Biological Process: regulation of transcription, DNA-templated (GO:0006355);; Molecular Function: sequence-specific DNA binding (GO:0043565);;	--	--	--	--	GRAS domain family	Scarecrow-like protein 31 OS=Arabidopsis thaliana OX=3702 GN=SCL31 PE=2 SV=3	K	Transcription	PREDICTED: scarecrow-like protein 14 [Nicotiana tabacum]	biological process: biological regulation (GO:0065007);; molecular function: nucleic acid binding transcription factor activity (GO:0001071);; cellular component: cell (GO:0005623);; cellular component: organelle (GO:0043226);; cellular component: cell part (GO:0044464);; molecular function: binding (GO:0005488)
Niben101Ctg03382g00001	Niben101Ctg03382g00001	3.40931	4.39457	2.07494	2.47986	2.04049	2.18991	4.28087	2.61099	3.60138	3.41571	3.82701	4.55663	0.878248	-0.1036	normal	0.23043	0.573089	normal	0.788439	-0.18339	normal	0.001782	-1.10093	down	0.310624	-0.40765	normal	--	--	Cellular Component: integral component of membrane (GO:0016021);;	--	--	[S]	Function unknown	--	--	S	Function unknown	PREDICTED: uncharacterized protein LOC104112429 isoform X5 [Nicotiana tomentosiformis]	cellular component: membrane (GO:0016020);; cellular component: membrane part (GO:0044425)
Niben101Ctg03632g00004	Niben101Ctg03632g00004	19.8023	16.8499	17.8335	14.1542	4.99769	10.7991	10.6423	4.63371	5.70215	5.13354	15.2518	17.5535	8.92e-06	-1.3112	down	0.627174	-0.32582	normal	0.634456	0.261011	normal	0.248113	-0.59666	normal	0.031335	-0.86949	normal	--	--	Molecular Function: glutamate-ammonia ligase activity (GO:0004356);; Molecular Function: ATP binding (GO:0005524);; Biological Process: glutamine biosynthetic process (GO:0006542);;	K01915|4.30874e-54|spen:107002042|K01915 glutamine synthetase [EC:6.3.1.2] | (RefSeq) glutamine synthetase, chloroplastic	Arginine biosynthesis (ko00220);; Alanine, aspartate and glutamate metabolism (ko00250);; Glyoxylate and dicarboxylate metabolism (ko00630);; Nitrogen metabolism (ko00910);; Biosynthesis of amino acids (ko01230)	[E]	Amino acid transport and metabolism	--	Glutamine synthetase, chloroplastic OS=Daucus carota OX=4039 GN=GLN2 PE=2 SV=1	E	Amino acid transport and metabolism	PREDICTED: glutamine synthetase, chloroplastic [Nicotiana tomentosiformis]	molecular function: catalytic activity (GO:0003824);; molecular function: binding (GO:0005488);; biological process: metabolic process (GO:0008152);; biological process: cellular process (GO:0009987);; biological process: single-organism process (GO:0044699)
Niben101Ctg05133g00002	Niben101Ctg05133g00002	159.987	146.17	180.13	100.449	75.5754	93.4565	147.822	136.258	97.9052	216.259	224.87	230.348	0.014453	-0.55077	normal	0.080767	0.523188	normal	0.004249	-0.48981	normal	2.86e-21	-1.69058	down	7.48e-10	-1.09197	down	[H]	Coenzyme transport and metabolism	Molecular Function: catalytic activity (GO:0003824);; Cellular Component: cytosol (GO:0005829);; Cellular Component: plasma membrane (GO:0005886);; Biological Process: cellular amino acid metabolic process (GO:0006520);; Biological Process: response to lipid hydroperoxide (GO:0006982);; Biological Process: response to UV-B (GO:0010224);; Biological Process: response to non-ionic osmotic stress (G…	K06215|6.45484e-108|spen:107023284|K06215 pyridoxal 5'-phosphate synthase pdxS subunit [EC:4.3.3.6] | (RefSeq) probable pyridoxal 5'-phosphate synthase subunit PDX1	Vitamin B6 metabolism (ko00750)	[H]	Coenzyme transport and metabolism	SOR/SNZ family	Pyridoxal 5&apos;-phosphate synthase subunit PDX1.1 OS=Arabidopsis thaliana OX=3702 GN=PDX11 PE=1 SV=1	H	Coenzyme transport and metabolism	PREDICTED: probable pyridoxal 5&apos;-phosphate synthase subunit PDX1 [Nicotiana tomentosiformis]	molecular function: catalytic activity (GO:0003824);; cellular component: cell (GO:0005623);; cellular component: cell part (GO:0044464);; cellular component: membrane (GO:0016020);; biological process: metabolic process (GO:0008152);; biological process: cellular process (GO:0009987);; biological process: single-organism process (GO:0044699);; biological process: response to stimulus (GO:0050896…
Niben101Ctg06879g00004	Niben101Ctg06879g00004	932.689	1019.44	940.808	704.314	489.492	479.385	671.138	748.236	747.962	1076.72	862.48	961.245	1.2e-07	-0.64535	normal	0.18597	0.40111	normal	0.870367	-0.08069	normal	5.51e-07	-1.16446	down	6.51e-06	-0.73862	normal	--	--	Biological Process: response to light stimulus (GO:0009416);; Cellular Component: photosystem I (GO:0009522);; Cellular Component: photosystem II (GO:0009523);; Cellular Component: chloroplast thylakoid membrane (GO:0009535);; Biological Process: photosynthesis, light harvesting in photosystem I (GO:0009768);; Cellular Component: chloroplast envelope (GO:0009941);; Cellular Component: plastoglobu…	K08908|5.79253e-123|egr:104433673|K08908 light-harvesting complex I chlorophyll a/b binding protein 2 | (RefSeq) chlorophyll a-b binding protein 7, chloroplastic	Photosynthesis - antenna proteins (ko00196)	--	--	Chlorophyll A-B binding protein	Chlorophyll a-b binding protein 7, chloroplastic OS=Solanum lycopersicum OX=4081 GN=CAB7 PE=3 SV=1	S	Function unknown	PREDICTED: chlorophyll a-b binding protein 7, chloroplastic isoform X1 [Ipomoea nil]	biological process: response to stimulus (GO:0050896);; cellular component: cell (GO:0005623);; cellular component: membrane (GO:0016020);; cellular component: macromolecular complex (GO:0032991);; cellular component: membrane part (GO:0044425);; cellular component: cell part (GO:0044464);; cellular component: organelle (GO:0043226);; cellular component: organelle part (GO:0044422);; biological p…
Niben101Ctg06906g00002	Niben101Ctg06906g00002	74.562	77.1295	87.5255	57.199	46.4805	54.2592	67.7138	64.9341	57.4701	83.9699	79.0451	83.5089	0.002649	-0.54957	normal	0.257772	0.315128	normal	0.814972	-0.10842	normal	2.84e-08	-1.03905	down	2.07e-05	-0.68987	normal	[O]	Posttranslational modification, protein turnover, chaperones	Molecular Function: metalloendopeptidase activity (GO:0004222);; Molecular Function: ATP binding (GO:0005524);; Biological Process: proteolysis (GO:0006508);; Cellular Component: integral component of membrane (GO:0016021);; Biological Process: cell division (GO:0051301);;	K03798|1.7575e-63|mdm:103444059|K03798 cell division protease FtsH [EC:3.4.24.-] | (RefSeq) ATP-dependent zinc metalloprotease FTSH 2, chloroplastic-like	--	[O]	Posttranslational modification, protein turnover, chaperones	Peptidase family M41	ATP-dependent zinc metalloprotease FTSH 2, chloroplastic OS=Oryza sativa subsp. japonica OX=39947 GN=FTSH2 PE=3 SV=1	O	Posttranslational modification, protein turnover, chaperones	ATP-dependent zinc metalloprotease FTSH 2, chloroplastic-like [Ananas comosus]	biological process: metabolic process (GO:0008152);; molecular function: catalytic activity (GO:0003824);; molecular function: binding (GO:0005488);; cellular component: membrane (GO:0016020);; cellular component: membrane part (GO:0044425);; biological process: cellular process (GO:0009987);; biological process: single-organism process (GO:0044699)
Niben101Ctg07034g00003	Niben101Ctg07034g00003	64.7319	71.6126	145.678	7.3508	73.5077	48.7626	13.0389	99.3014	88.7427	159.377	137.904	155.811	0.666156	-0.27155	normal	0.757929	0.232745	normal	0.508209	-0.31856	normal	0.020742	-1.36712	down	0.177731	-0.67686	normal	[G]	Carbohydrate transport and metabolism	Molecular Function: transporter activity (GO:0005215);; Biological Process: transport (GO:0006810);; Cellular Component: integral component of membrane (GO:0016021);;	K09872|2.05686e-142|spen:107031663|K09872 aquaporin PIP | (RefSeq) aquaporin PIP2-1-like	--	[G]	Carbohydrate transport and metabolism	Major intrinsic protein	Aquaporin PIP2-1 OS=Arabidopsis thaliana OX=3702 GN=PIP2-1 PE=1 SV=1	G	Carbohydrate transport and metabolism	PREDICTED: aquaporin PIP2-1-like [Nicotiana tomentosiformis]	molecular function: transporter activity (GO:0005215);; biological process: localization (GO:0051179);; cellular component: membrane (GO:0016020);; cellular component: membrane part (GO:0044425)
Niben101Ctg07107g00002	Niben101Ctg07107g00002	5.41407	5.1414	5.13542	5.96537	0	6.10589	7.29378	0	0	0	0	0	0.824345	-0.08153	normal	0.950073	-0.02487	normal	1.05e-11	1.44528	up	--	--	--	--	--	--	[J]	Translation, ribosomal structure and biogenesis	Molecular Function: nucleotide binding (GO:0000166);; Molecular Function: translation elongation factor activity (GO:0003746);; Molecular Function: GTPase activity (GO:0003924);; Cellular Component: mitochondrion (GO:0005739);; Biological Process: mitochondrial translational elongation (GO:0070125);;	K02355|3.62267e-53|spen:107006383|K02355 elongation factor G | (RefSeq) elongation factor G-2, mitochondrial	--	[J]	Translation, ribosomal structure and biogenesis	Elongation Factor G, domain II	Elongation factor G, mitochondrial OS=Oryza sativa subsp. japonica OX=39947 GN=Os03g0565500 PE=2 SV=2	J	Translation, ribosomal structure and biogenesis	PREDICTED: elongation factor G-2, mitochondrial-like [Nicotiana sylvestris]	molecular function: binding (GO:0005488);; biological process: metabolic process (GO:0008152);; biological process: cellular process (GO:0009987);; molecular function: catalytic activity (GO:0003824);; cellular component: cell (GO:0005623);; cellular component: organelle (GO:0043226);; cellular component: cell part (GO:0044464)
Niben101Ctg08693g00002	Niben101Ctg08693g00002	2.7387	2.34798	2.65134	2.56397	4.17456	2.75057	8.90626	4.42883	5.65054	1.79397	2.42006	1.06123	0.006912	0.856584	normal	0.017978	0.898199	normal	0.616008	0.270668	normal	0.424017	0.359797	normal	0.000163	1.22331	up	--	--	Cellular Component: nucleus (GO:0005634);; Cellular Component: cytosol (GO:0005829);; Cellular Component: plasma membrane (GO:0005886);; Cellular Component: integral component of membrane (GO:0016021);;	--	--	--	--	Cotton fibre expressed protein	--	S	Function unknown	PREDICTED: pollen-specific leucine-rich repeat extensin-like protein 1 [Nicotiana attenuata]	cellular component: cell (GO:0005623);; cellular component: organelle (GO:0043226);; cellular component: cell part (GO:0044464);; cellular component: membrane (GO:0016020);; cellular component: membrane part (GO:0044425)
Niben101Ctg09170g00001	Niben101Ctg09170g00001	5.73946	9.72306	4.79401	1.03986	4.91629	14.5994	1.55173	2.69927	1.68202	1.67527	0.69286	2.80197	0.000749	-1.28015	down	--	--	--	0.044922	0.609214	normal	--	--	--	--	--	--	--	--	Molecular Function: serine-type endopeptidase inhibitor activity (GO:0004867);; Biological Process: response to wounding (GO:0009611);; Biological Process: negative regulation of endopeptidase activity (GO:0010951);;	--	--	--	--	Potato inhibitor I family	Ethylene-responsive proteinase inhibitor 1 OS=Solanum lycopersicum OX=4081 PE=3 SV=1	--	--	PREDICTED: proteinase inhibitor I-B-like [Nicotiana tabacum]	biological process: biological regulation (GO:0065007);; molecular function: molecular function regulator (GO:0098772);; biological process: response to stimulus (GO:0050896)
Niben101Ctg09403g00001	Niben101Ctg09403g00001	16.7894	28.0037	19.717	39.1392	49.6369	39.4635	47.1243	55.9256	45.2856	13.2288	15.0108	12.8126	0.000917	0.845131	normal	0.382564	0.270371	normal	0.309653	0.392058	normal	8.07e-08	1.15234	up	2.87e-12	1.40018	up	--	--	--	--	--	--	--	--	--	--	--	--	--
Niben101Ctg09679g00001	Niben101Ctg09679g00001	1.10133	1.66016	1.90548	0.510688	1.09684	1.08129	2.32087	1.38545	2.74355	2.06724	3.05162	1.74082	0.815371	0.155356	normal	0.036751	0.973832	normal	0.504209	-0.32443	normal	9.52e-05	-1.53447	down	0.464425	-0.33411	normal	[P]	Inorganic ion transport and metabolism	Cellular Component: integral component of plasma membrane (GO:0005887);; Molecular Function: ammonium transmembrane transporter activity (GO:0008519);; Biological Process: organic cation transport (GO:0015695);; Biological Process: nitrogen utilization (GO:0019740);; Biological Process: ammonium transmembrane transport (GO:0072488);;	K03320|1.90011e-145|spen:107031345|K03320 ammonium transporter, Amt family | (RefSeq) ammonium transporter 1 member 1	--	[P]	Inorganic ion transport and metabolism	Ammonium Transporter Family	Ammonium transporter 1 member 1 OS=Solanum lycopersicum OX=4081 GN=AMT1-1 PE=2 SV=1	P	Inorganic ion transport and metabolism	PREDICTED: ammonium transporter 1 member 1 [Nicotiana attenuata]	cellular component: cell (GO:0005623);; cellular component: membrane (GO:0016020);; cellular component: membrane part (GO:0044425);; cellular component: cell part (GO:0044464);; biological process: localization (GO:0051179);; molecular function: transporter activity (GO:0005215);; biological process: single-organism process (GO:0044699)
Niben101Ctg10016g00001	Niben101Ctg10016g00001	0.793412	1.30127	0.267306	2.32753	3.42122	2.27253	0.745678	1.5958	1.44458	0.519742	0.750628	0.476827	0.714649	0.246558	normal	0.086288	-0.77549	normal	--	--	--	7.35e-05	1.51447	up	--	--	--	--	--	--	--	--	--	--	--	--	S	Function unknown	PREDICTED: uncharacterized protein At3g17950-like [Nicotiana tomentosiformis]	--
Niben101Ctg10591g00003	Niben101Ctg10591g00003	246.516	207.675	293.858	101.037	71.7508	85.6153	299.774	199.522	168.602	401.55	322.299	400.007	0.240964	-0.36884	normal	1.78e-06	1.28029	up	0.008516	-0.56526	normal	1.37e-31	-2.44464	down	8.61e-06	-1.00722	down	[P]	Inorganic ion transport and metabolism	Biological Process: amino acid transmembrane transport (GO:0003333);; Molecular Function: catalase activity (GO:0004096);; Cellular Component: peroxisome (GO:0005777);; Molecular Function: amino acid transmembrane transporter activity (GO:0015171);; Cellular Component: integral component of membrane (GO:0016021);; Molecular Function: heme binding (GO:0020037);; Biological Process: response to hyd…	K03781|1.23544e-133|sot:102577720|K03781 catalase [EC:1.11.1.6] | (RefSeq) catalase isozyme 2	Tryptophan metabolism (ko00380);; Glyoxylate and dicarboxylate metabolism (ko00630);; Carbon metabolism (ko01200);; Peroxisome (ko04146)	[P]	Inorganic ion transport and metabolism	Catalase	Catalase isozyme 1 (Fragment) OS=Nicotiana plumbaginifolia OX=4092 GN=CAT1 PE=2 SV=1	P	Inorganic ion transport and metabolism	PREDICTED: catalase isozyme 1 [Nicotiana sylvestris]	biological process: single-organism process (GO:0044699);; biological process: localization (GO:0051179);; biological process: metabolic process (GO:0008152);; biological process: cellular process (GO:0009987);; biological process: response to stimulus (GO:0050896);; biological process: detoxification (GO:0098754);; molecular function: catalytic activity (GO:0003824);; molecular function: antioxi…
Niben101Ctg10718g00002	Niben101Ctg10718g00002	4770.24	5250.22	5699.13	3904.37	2884.65	2766.81	3330.32	3794.08	3910.6	5821.11	4974.98	5307.71	1.02e-06	-0.72974	normal	0.446469	0.250821	normal	0.815786	-0.10427	normal	1.21e-07	-1.1338	down	1.08e-08	-0.86083	normal	[G]	Carbohydrate transport and metabolism	Molecular Function: monooxygenase activity (GO:0004497);; Cellular Component: chloroplast (GO:0009507);; Biological Process: photorespiration (GO:0009853);; Molecular Function: ribulose-bisphosphate carboxylase activity (GO:0016984);; Biological Process: reductive pentose-phosphate cycle (GO:0019253);; Biological Process: oxidation-reduction process (GO:0055114);;	K01602|3.46589e-119|sly:101268337|K01602 ribulose-bisphosphate carboxylase small chain [EC:4.1.1.39] | (RefSeq) Rbcs-3B, rbcS3B; ribulose bisphosphate carboxylase small chain 3B, chloroplastic-like	Glyoxylate and dicarboxylate metabolism (ko00630);; Carbon fixation in photosynthetic organisms (ko00710);; Carbon metabolism (ko01200)	--	--	Ribulose bisphosphate carboxylase, small chain;; Ribulose-1,5-bisphosphate carboxylase small subunit	Ribulose bisphosphate carboxylase small chain 8B, chloroplastic OS=Nicotiana plumbaginifolia OX=4092 GN=RBCS-8B PE=3 SV=1	C	Energy production and conversion	RecName: Full=Ribulose bisphosphate carboxylase small chain 8B, chloroplastic; Short=RuBisCO small subunit 8B; Flags: Precursor	biological process: metabolic process (GO:0008152);; biological process: single-organism process (GO:0044699);; molecular function: catalytic activity (GO:0003824);; cellular component: cell (GO:0005623);; cellular component: organelle (GO:0043226);; cellular component: cell part (GO:0044464);; biological process: cellular process (GO:0009987)
Niben101Ctg10862g00003	Niben101Ctg10862g00003	35.5654	33.7443	32.3045	25.7337	15.3127	18.1384	24.7961	22.5787	25.2992	36.0181	31.7211	32.8479	8.6e-08	-0.70508	normal	0.40371	0.319662	normal	0.904761	-0.0622	normal	8.49e-06	-1.12208	down	5.78e-07	-0.7831	normal	--	--	Cellular Component: chloroplast thylakoid membrane (GO:0009535);; Cellular Component: NAD(P)H dehydrogenase complex (plastoquinone) (GO:0010598);;	--	--	--	--	--	Photosynthetic NDH subunit of subcomplex B 4, chloroplastic OS=Arabidopsis thaliana OX=3702 GN=PNSB4 PE=2 SV=1	S	Function unknown	PREDICTED: uncharacterized protein LOC104210145 [Nicotiana sylvestris]	cellular component: cell (GO:0005623);; cellular component: membrane (GO:0016020);; cellular component: organelle (GO:0043226);; cellular component: organelle part (GO:0044422);; cellular component: cell part (GO:0044464);; cellular component: macromolecular complex (GO:0032991);; cellular component: membrane part (GO:0044425)
Niben101Ctg11026g00001	Niben101Ctg11026g00001	6.24215	8.21122	7.16093	5.50781	4.16166	5.10193	6.05446	6.15621	7.18692	8.43623	7.25162	8.07861	0.152797	-0.37038	normal	0.186999	0.418084	normal	0.713498	-0.17733	normal	7.13e-06	-1.05876	down	0.004665	-0.59717	normal	[G]	Carbohydrate transport and metabolism	Cellular Component: cytosol (GO:0005829);; Cellular Component: chloroplast (GO:0009507);; Biological Process: dephosphorylation (GO:0016311);; Molecular Function: phosphatase activity (GO:0016791);;	K15634|2.36407e-70|sly:101247926|K15634 probable phosphoglycerate mutase [EC:5.4.2.12] | (RefSeq) probable 2-carboxy-D-arabinitol-1-phosphatase	Glycolysis / Gluconeogenesis (ko00010);; Glycine, serine and threonine metabolism (ko00260);; Carbon metabolism (ko01200);; Biosynthesis of amino acids (ko01230)	[G]	Carbohydrate transport and metabolism	--	Probable 2-carboxy-D-arabinitol-1-phosphatase OS=Arabidopsis thaliana OX=3702 GN=At5g22620 PE=1 SV=1	G	Carbohydrate transport and metabolism	PREDICTED: probable 2-carboxy-D-arabinitol-1-phosphatase [Nicotiana tomentosiformis]	cellular component: cell (GO:0005623);; cellular component: cell part (GO:0044464);; cellular component: organelle (GO:0043226);; biological process: metabolic process (GO:0008152);; biological process: cellular process (GO:0009987);; molecular function: catalytic activity (GO:0003824)
Niben101Ctg11091g00003	Niben101Ctg11091g00003	8.62193	3.31759	10.5422	3.92006	8.782	4.00587	43.2941	40.2852	41.2518	3.44687	1.92006	6.79532	5.41e-10	1.77867	up	4.07e-23	2.60327	up	0.74702	0.172188	normal	0.977776	-0.02059	normal	7.43e-07	1.89712	up	[G]	Carbohydrate transport and metabolism	Molecular Function: hydrolase activity, hydrolyzing O-glycosyl compounds (GO:0004553);; Cellular Component: cell wall (GO:0005618);; Biological Process: xyloglucan metabolic process (GO:0010411);; Molecular Function: xyloglucan:xyloglucosyl transferase activity (GO:0016762);; Biological Process: cell wall biogenesis (GO:0042546);; Cellular Component: apoplast (GO:0048046);; Biological Process: ce…	K08235|1.78914e-91|sot:102598758|K08235 xyloglucan:xyloglucosyl transferase [EC:2.4.1.207] | (RefSeq) probable xyloglucan endotransglucosylase/hydrolase protein 23	--	--	--	Glycosyl hydrolases family 16	Probable xyloglucan endotransglucosylase/hydrolase protein 25 OS=Arabidopsis thaliana OX=3702 GN=XTH25 PE=2 SV=2	G	Carbohydrate transport and metabolism	senescence 4-like protein [Nicotiana benthamiana]	molecular function: catalytic activity (GO:0003824);; cellular component: cell (GO:0005623);; cellular component: cell part (GO:0044464);; biological process: metabolic process (GO:0008152);; biological process: cellular process (GO:0009987);; biological process: cellular component organization or biogenesis (GO:0071840);; cellular component: extracellular region (GO:0005576)
Niben101Ctg12033g00001	Niben101Ctg12033g00001	20.5134	8.46164	3.74735	14.3595	4.36674	7.5501	67.8906	69.168	27.0545	48.0146	4.75288	7.02289	0.048701	0.868024	normal	6.77e-07	1.9166	up	0.826871	-0.09457	normal	0.290182	-0.71336	normal	0.56819	0.317051	normal	[O]	Posttranslational modification, protein turnover, chaperones	Molecular Function: peroxidase activity (GO:0004601);; Cellular Component: extracellular region (GO:0005576);; Biological Process: response to oxidative stress (GO:0006979);; Molecular Function: heme binding (GO:0020037);; Biological Process: hydrogen peroxide catabolic process (GO:0042744);; Molecular Function: metal ion binding (GO:0046872);; Molecular Function: peroxiredoxin activity (GO:00519…	--	--	[O]	Posttranslational modification, protein turnover, chaperones	Redoxin;; AhpC/TSA family	Peroxiredoxin-2B OS=Arabidopsis thaliana OX=3702 GN=PRXIIB PE=1 SV=1	O	Posttranslational modification, protein turnover, chaperones	PREDICTED: peroxiredoxin-2B-like [Nicotiana tabacum]	biological process: metabolic process (GO:0008152);; biological process: cellular process (GO:0009987);; biological process: single-organism process (GO:0044699);; biological process: response to stimulus (GO:0050896);; biological process: detoxification (GO:0098754);; molecular function: catalytic activity (GO:0003824);; molecular function: antioxidant activity (GO:0016209);; cellular component:…
Niben101Ctg12072g00001	Niben101Ctg12072g00001	5.7654	7.74854	6.12986	15.7054	24.761	16.9128	6.82191	7.39507	10.5984	4.8789	5.95898	4.35728	0.915506	0.068201	normal	0.003306	-0.96781	normal	0.817409	0.165051	normal	3.95e-06	1.35034	up	0.493291	0.299183	normal	[G]	Carbohydrate transport and metabolism	Molecular Function: ribokinase activity (GO:0004747);; Molecular Function: ATP binding (GO:0005524);; Biological Process: D-ribose metabolic process (GO:0006014);; Molecular Function: fructokinase activity (GO:0008865);; Biological Process: starch biosynthetic process (GO:0019252);; Biological Process: carbohydrate phosphorylation (GO:0046835);;	K00847|8.74175e-46|sot:102577816|K00847 fructokinase [EC:2.7.1.4] | (RefSeq) fructokinase-like	Fructose and mannose metabolism (ko00051);; Starch and sucrose metabolism (ko00500);; Amino sugar and nucleotide sugar metabolism (ko00520)	[G]	Carbohydrate transport and metabolism	pfkB family carbohydrate kinase	Fructokinase OS=Solanum tuberosum OX=4113 PE=2 SV=1	G	Carbohydrate transport and metabolism	fructokinase, partial [Nicotiana tabacum]	biological process: metabolic process (GO:0008152);; biological process: cellular process (GO:0009987);; molecular function: catalytic activity (GO:0003824);; molecular function: binding (GO:0005488);; biological process: single-organism process (GO:0044699)
Niben101Ctg12306g00003	Niben101Ctg12306g00003	4.66212	4.27734	5.62198	3.59752	2.769	3.61659	6.36911	5.10549	4.28838	5.33528	5.23399	5.7839	0.791489	-0.12087	normal	0.048303	0.646555	normal	0.683664	-0.19453	normal	4.72e-06	-1.08359	down	0.180025	-0.36503	normal	--	--	--	--	--	--	--	--	MACPF domain-containing protein NSL1 OS=Arabidopsis thaliana OX=3702 GN=NSL1 PE=2 SV=1	S	Function unknown	PREDICTED: MACPF domain-containing protein NSL1 [Nicotiana sylvestris]	--
Niben101Ctg12456g00002	Niben101Ctg12456g00002	448.322	437.764	442.694	322.768	249.452	276.888	368.399	342.274	315.849	488.526	429.5	490.74	7.86e-06	-0.59896	normal	0.237894	0.320375	normal	0.642113	-0.15255	normal	1.03e-08	-1.12207	down	8.81e-07	-0.77211	normal	--	--	Cellular Component: cell (GO:0005623);; Biological Process: glycerol ether metabolic process (GO:0006662);; Molecular Function: protein disulfide oxidoreductase activity (GO:0015035);; Biological Process: cell redox homeostasis (GO:0045454);; Biological Process: oxidation-reduction process (GO:0055114);;	K03671|7.02285e-08|sot:102588026|K03671 thioredoxin 1 | (RefSeq) thioredoxin-1-like	--	--	--	--	--	O	Posttranslational modification, protein turnover, chaperones	PREDICTED: uncharacterized protein LOC109228938 [Nicotiana attenuata]	cellular component: cell (GO:0005623);; biological process: metabolic process (GO:0008152);; biological process: single-organism process (GO:0044699);; molecular function: catalytic activity (GO:0003824);; biological process: cellular process (GO:0009987);; biological process: biological regulation (GO:0065007)
Niben101Ctg12626g00002	Niben101Ctg12626g00002	14.2247	7.53212	5.4059	12.7524	18.4164	44.9586	15.4862	8.56133	8.33812	6.846	6.056	5.90723	0.983095	0.015966	normal	0.086806	-0.8317	normal	0.6807	0.241013	normal	0.000889	1.33668	up	0.368599	0.365323	normal	--	--	--	--	--	--	--	Ankyrin repeats (many copies);; Ankyrin repeat;; Ankyrin repeat	Putative E3 ubiquitin-protein ligase XBAT31 OS=Arabidopsis thaliana OX=3702 GN=XBAT31 PE=2 SV=1	S	Function unknown	PREDICTED: putative E3 ubiquitin-protein ligase XBAT31 [Nicotiana sylvestris]	--
Niben101Ctg12683g00001	Niben101Ctg12683g00001	41.5059	27.1747	67.4496	23.8713	50.2598	30.809	246.282	139.136	161.897	27.731	56.7785	31.1667	0.004315	1.12088	up	2.87e-15	2.14436	up	0.932255	0.07653	normal	0.109283	-0.52697	normal	8.31e-13	1.71849	up	--	--	Molecular Function: metal ion binding (GO:0046872);;	--	--	[R]	General function prediction only	Ankyrin repeat;; Ankyrin repeats (many copies);; Ankyrin repeats (3 copies);; Ankyrin repeat	Zinc finger CCCH domain-containing protein 29 OS=Arabidopsis thaliana OX=3702 GN=At2g40140 PE=1 SV=1	S	Function unknown	PREDICTED: zinc finger CCCH domain-containing protein 29-like [Nicotiana attenuata]	molecular function: binding (GO:0005488)
Niben101Ctg12826g00003	Niben101Ctg12826g00003	0.676128	2.07633	1.08792	2.06997	2.9866	1.50027	0.831064	1.1068	1.59615	0.428649	0.767135	0.712277	--	--	--	0.301261	-0.57123	normal	--	--	--	0.027763	1.04511	up	--	--	--	[T]	Signal transduction mechanisms	--	--	--	[R]	General function prediction only	Ankyrin repeats (3 copies);; Ankyrin repeat;; Ankyrin repeats (many copies);; Ankyrin repeats (many copies);; Ankyrin repeat	Ankyrin repeat domain-containing protein EMB506, chloroplastic OS=Arabidopsis thaliana OX=3702 GN=EMB506 PE=1 SV=1	S	Function unknown	PREDICTED: ankyrin repeat domain-containing protein EMB506, chloroplastic-like isoform X1 [Nicotiana tabacum]	--
Niben101Ctg12975g00002	Niben101Ctg12975g00002	1.57333	3.13596	1.42856	3.08278	2.50275	3.59093	4.55967	2.67589	2.9874	1.1365	0.753441	1.12444	0.519583	0.346416	normal	0.785486	0.179756	normal	--	--	--	0.031428	0.951692	normal	0.008812	1.01278	up	--	--	Molecular Function: serine-type endopeptidase activity (GO:0004252);; Biological Process: proteolysis (GO:0006508);;	--	--	[R]	General function prediction only	--	Protease Do-like 7 OS=Arabidopsis thaliana OX=3702 GN=DEGP7 PE=2 SV=1	O	Posttranslational modification, protein turnover, chaperones	PREDICTED: protease Do-like 7 [Nicotiana tabacum]	biological process: metabolic process (GO:0008152);; molecular function: catalytic activity (GO:0003824)
Niben101Ctg13028g00004	Niben101Ctg13028g00004	20.7766	17.1415	21.2495	13.8676	11.2833	11.9006	27.2466	16.6948	16.0714	20.4219	20.0167	22.1656	0.619815	-0.20045	normal	0.045102	0.673317	normal	0.774673	-0.13764	normal	2.88e-08	-1.13989	down	0.205376	-0.36925	normal	[D]	Cell cycle control, cell division, chromosome partitioning	Molecular Function: 5'-nucleotidase activity (GO:0008253);; Biological Process: dephosphorylation (GO:0016311);;	--	--	[F]	Nucleotide transport and metabolism	5' nucleotidase family	--	S	Function unknown	PREDICTED: 5&apos;-nucleotidase domain-containing protein 4 isoform X3 [Nicotiana tomentosiformis]	biological process: metabolic process (GO:0008152);; biological process: cellular process (GO:0009987);; molecular function: catalytic activity (GO:0003824)
Niben101Ctg13030g00001	Niben101Ctg13030g00001	3.34418	3.02162	3.77003	2.83015	1.27248	2.44739	7.31114	6.65352	7.27223	6.4885	5.03911	5.8238	0.103953	0.634576	normal	0.001295	1.29935	up	0.298506	-0.42991	normal	0.00036	-1.5064	down	0.939899	-0.04473	normal	--	--	Molecular Function: iron ion binding (GO:0005506);; Cellular Component: membrane (GO:0016020);; Molecular Function: oxidoreductase activity, acting on paired donors, with incorporation or reduction of molecular oxygen, NAD(P)H as one donor, and incorporation of one atom of oxygen (GO:0016709);; Molecular Function: heme binding (GO:0020037);; Biological Process: secondary metabolite biosynthetic p…	--	--	[Q]	Secondary metabolites biosynthesis, transport and catabolism	Cytochrome P450	Cytochrome P450 71D7 OS=Solanum chacoense OX=4108 GN=CYP71D7 PE=3 SV=1	Q	Secondary metabolites biosynthesis, transport and catabolism	PREDICTED: premnaspirodiene oxygenase-like [Nicotiana attenuata]	molecular function: binding (GO:0005488);; cellular component: membrane (GO:0016020);; biological process: metabolic process (GO:0008152);; biological process: single-organism process (GO:0044699);; molecular function: catalytic activity (GO:0003824)
Niben101Ctg13288g00002	Niben101Ctg13288g00002	5.21101	0	0.744054	0.61561	2.51306	4.11326	0.249916	1.8798	0	5.20088	5.51269	3.27622	--	--	--	--	--	--	0.853399	-0.06175	normal	0.026766	-1.10143	down	0.239313	-0.47911	normal	--	--	--	--	--	[Z]	Cytoskeleton	Interferon-related developmental regulator (IFRD)	--	K	Transcription	PREDICTED: interferon-related developmental regulator 2 [Solanum tuberosum]	--
Niben101Ctg13666g00001	Niben101Ctg13666g00001	1.56087	1.03499	1.41631	1.3495	1.75896	2.01319	1.69632	2.35215	1.51374	0	0	0	0.825679	0.149597	normal	0.846073	0.143884	normal	--	--	--	--	--	--	4.78e-10	2.43725	up	--	--	Molecular Function: ubiquitin-protein transferase activity (GO:0004842);; Biological Process: mitochondrion organization (GO:0007005);; Molecular Function: zinc ion binding (GO:0008270);; Cellular Component: integral component of membrane (GO:0016021);; Biological Process: protein ubiquitination (GO:0016567);; Molecular Function: ligase activity (GO:0016874);;	K15688|1.16571e-14|sot:102586439|K15688 E3 ubiquitin-protein ligase MUL1 [EC:2.3.2.27] | (RefSeq) mitochondrial ubiquitin ligase activator of nfkb 1-like	--	--	--	--	--	O	Posttranslational modification, protein turnover, chaperones	PREDICTED: mitochondrial ubiquitin ligase activator of NFKB 1-like [Nicotiana tabacum]	molecular function: catalytic activity (GO:0003824);; biological process: cellular process (GO:0009987);; biological process: cellular component organization or biogenesis (GO:0071840);; molecular function: binding (GO:0005488);; cellular component: membrane (GO:0016020);; cellular component: membrane part (GO:0044425);; biological process: metabolic process (GO:0008152)
Niben101Ctg13703g00001	Niben101Ctg13703g00001	8.92746	12.6313	7.10603	25.9275	27.3984	21.0493	4.84529	9.74227	15.4535	5.31016	8.12721	4.65113	0.828231	-0.13653	normal	0.007521	-1.01322	down	0.238286	0.421036	normal	9.23e-12	1.54506	up	0.462265	0.327698	normal	[G]	Carbohydrate transport and metabolism	Biological Process: flavonoid biosynthetic process (GO:0009813);; Cellular Component: intracellular membrane-bounded organelle (GO:0043231);; Biological Process: flavonoid glucuronidation (GO:0052696);; Molecular Function: quercetin 3-O-glucosyltransferase activity (GO:0080043);; Molecular Function: quercetin 7-O-glucosyltransferase activity (GO:0080044);;	--	--	[GC]	Carbohydrate transport and metabolism;; Energy production and conversion	UDP-glucoronosyl and UDP-glucosyl transferase	Scopoletin glucosyltransferase OS=Nicotiana tabacum OX=4097 GN=TOGT1 PE=1 SV=1	S	Function unknown	PREDICTED: scopoletin glucosyltransferase-like isoform X2 [Nicotiana tomentosiformis]	biological process: metabolic process (GO:0008152);; cellular component: cell (GO:0005623);; cellular component: organelle (GO:0043226);; cellular component: cell part (GO:0044464);; biological process: cellular process (GO:0009987);; biological process: single-organism process (GO:0044699);; molecular function: catalytic activity (GO:0003824)
Niben101Ctg13736g00004	Niben101Ctg13736g00004	1.29123	1.9169	2.00349	24.7085	4.9813	15.0847	5.68153	48.6925	18.3118	0.716971	4.31841	2.11076	0.002813	1.17596	up	0.735768	0.256627	normal	0.740454	-0.20916	normal	0.038116	1.26479	up	0.033045	0.929729	normal	--	--	Cellular Component: proteinaceous extracellular matrix (GO:0005578);; Cellular Component: extracellular space (GO:0005615);; Biological Process: carbohydrate metabolic process (GO:0005975);; Biological Process: response to biotic stimulus (GO:0009607);; Biological Process: plant-type hypersensitive response (GO:0009626);; Molecular Function: glucan endo-1,3-beta-D-glucosidase activity (GO:0042973…	--	--	--	--	Glycosyl hydrolases family 17	Glucan endo-1,3-beta-glucosidase, acidic isoform GI9 OS=Nicotiana tabacum OX=4097 GN=PR2 PE=1 SV=1	G	Carbohydrate transport and metabolism	PREDICTED: glucan endo-1,3-beta-glucosidase, acidic isoform GI9-like [Nicotiana sylvestris]	cellular component: extracellular region (GO:0005576);; cellular component: extracellular region part (GO:0044421);; biological process: metabolic process (GO:0008152);; biological process: response to stimulus (GO:0050896);; biological process: immune system process (GO:0002376);; biological process: cellular process (GO:0009987);; biological process: single-organism process (GO:0044699);; molec…
Niben101Ctg13774g00001	Niben101Ctg13774g00001	0.593299	0.544026	0.765556	1.00073	1.5036	1.59865	0.592024	0.69912	0.645264	0.32848	0.582187	0.17357	--	--	--	0.067756	-0.78307	normal	--	--	--	0.008185	1.19854	up	--	--	--	--	--	Molecular Function: DNA binding (GO:0003677);; Cellular Component: nucleus (GO:0005634);; Biological Process: regulation of transcription, DNA-templated (GO:0006355);; Biological Process: xylem development (GO:0010089);; Biological Process: regulation of programmed cell death (GO:0043067);; Biological Process: shoot system development (GO:0048367);;	--	--	--	--	No apical meristem (NAM) protein	NAC domain-containing protein 104 OS=Arabidopsis thaliana OX=3702 GN=NAC104 PE=2 SV=1	S	Function unknown	PREDICTED: NAC transcription factor 25 isoform X1 [Nicotiana sylvestris]	molecular function: binding (GO:0005488);; cellular component: cell (GO:0005623);; cellular component: organelle (GO:0043226);; cellular component: cell part (GO:0044464);; biological process: biological regulation (GO:0065007);; biological process: developmental process (GO:0032502);; biological process: multicellular organismal process (GO:0032501);; biological process: single-organism process …
Niben101Ctg13781g00001	Niben101Ctg13781g00001	2.0398	0.248966	0.076393	1.05067	22.9289	4.89477	1.07437	0.376549	0.476261	0.0807	0.062524	0.218191	--	--	--	0.061247	-0.91351	normal	--	--	--	0.001526	1.81174	up	--	--	--	--	--	Molecular Function: transferase activity, transferring acyl groups other than amino-acyl groups (GO:0016747);;	--	--	--	--	Transferase family	Acetyl-CoA-benzylalcohol acetyltransferase OS=Clarkia breweri OX=36903 GN=BEAT PE=1 SV=1	--	--	PREDICTED: pelargonidin 3-O-(6-caffeoylglucoside) 5-O-(6-O-malonylglucoside) 4&apos;&apos;&apos;-malonyltransferase-like [Nicotiana sylvestris]	molecular function: catalytic activity (GO:0003824)
Niben101Ctg13782g00003	Niben101Ctg13782g00003	4.15156	1.55674	3.23651	1.50257	4.05032	1.65236	13.6185	10.1012	11.7364	1.60817	1.87663	2.65863	5.87e-07	1.42361	up	7.88e-10	1.95838	up	0.654848	0.253675	normal	0.718378	-0.20029	normal	2.06e-18	1.97117	up	--	--	Molecular Function: hydrolase activity, hydrolyzing O-glycosyl compounds (GO:0004553);; Cellular Component: cell wall (GO:0005618);; Biological Process: xyloglucan metabolic process (GO:0010411);; Molecular Function: xyloglucan:xyloglucosyl transferase activity (GO:0016762);; Biological Process: cell wall biogenesis (GO:0042546);; Cellular Component: apoplast (GO:0048046);; Biological Process: ce…	K08235|1.11194e-145|spen:107015042|K08235 xyloglucan:xyloglucosyl transferase [EC:2.4.1.207] | (RefSeq) probable xyloglucan endotransglucosylase/hydrolase protein 23	--	--	--	Glycosyl hydrolases family 16;; Xyloglucan endo-transglycosylase (XET) C-terminus;; Glycosyl hydrolases family 16	Probable xyloglucan endotransglucosylase/hydrolase protein 23 OS=Arabidopsis thaliana OX=3702 GN=XTH23 PE=2 SV=1	G	Carbohydrate transport and metabolism	senescence 4-like protein [Nicotiana benthamiana]	molecular function: catalytic activity (GO:0003824);; cellular component: cell (GO:0005623);; cellular component: cell part (GO:0044464);; biological process: metabolic process (GO:0008152);; biological process: cellular process (GO:0009987);; biological process: cellular component organization or biogenesis (GO:0071840);; cellular component: extracellular region (GO:0005576)
Niben101Ctg13927g00002	Niben101Ctg13927g00002	15.247	32.4768	21.6849	9.43651	5.89835	4.70761	20.9772	17.9057	29.3366	13.8609	10.5769	26.0711	0.637815	-0.22724	normal	6.48e-06	1.49839	up	0.739004	0.209582	normal	0.000138	-1.51109	down	0.920083	0.059024	normal	--	--	Biological Process: response to light stimulus (GO:0009416);; Cellular Component: chloroplast thylakoid membrane (GO:0009535);; Biological Process: photosynthesis, light harvesting in photosystem I (GO:0009768);; Cellular Component: chloroplast envelope (GO:0009941);; Cellular Component: plastoglobule (GO:0010287);; Cellular Component: integral component of membrane (GO:0016021);; Molecular Funct…	K08912|1.78626e-64|nnu:104587698|K08912 light-harvesting complex II chlorophyll a/b binding protein 1 | (RefSeq) chlorophyll a-b binding protein 1D	Photosynthesis - antenna proteins (ko00196)	--	--	Chlorophyll A-B binding protein	Chlorophyll a-b binding protein 1D (Fragment) OS=Solanum lycopersicum OX=4081 GN=CAB1D PE=3 SV=1	--	--	PREDICTED: chlorophyll a-b binding protein 1D [Nicotiana tomentosiformis]	biological process: response to stimulus (GO:0050896);; cellular component: cell (GO:0005623);; cellular component: membrane (GO:0016020);; cellular component: organelle (GO:0043226);; cellular component: organelle part (GO:0044422);; cellular component: cell part (GO:0044464);; biological process: metabolic process (GO:0008152);; biological process: cellular process (GO:0009987);; cellular compo…
Niben101Ctg14049g00002	Niben101Ctg14049g00002	31.0342	63.1844	44.8191	26.1511	15.6188	9.97246	43.0677	32.5049	52.4618	64.1274	103.628	48.3347	0.400397	-0.31887	normal	0.002686	1.10709	up	0.503384	-0.32457	normal	4.71e-11	-2.18856	down	9.95e-05	-0.96934	normal	--	--	Cellular Component: photosystem I (GO:0009522);; Cellular Component: photosystem II (GO:0009523);; Cellular Component: chloroplast thylakoid membrane (GO:0009535);; Biological Process: photosynthesis, light harvesting (GO:0009765);; Cellular Component: integral component of membrane (GO:0016021);; Molecular Function: chlorophyll binding (GO:0016168);; Biological Process: protein-chromophore linka…	K08912|2.67946e-112|sot:102586241|K08912 light-harvesting complex II chlorophyll a/b binding protein 1 | (RefSeq) chlorophyll a-b binding protein 40, chloroplastic	Photosynthesis - antenna proteins (ko00196)	--	--	Chlorophyll A-B binding protein	Chlorophyll a-b binding protein 7, chloroplastic OS=Nicotiana tabacum OX=4097 GN=CAB7 PE=3 SV=1	J	Translation, ribosomal structure and biogenesis	PREDICTED: chlorophyll a-b binding protein 7, chloroplastic-like [Nicotiana sylvestris]	cellular component: cell (GO:0005623);; cellular component: membrane (GO:0016020);; cellular component: macromolecular complex (GO:0032991);; cellular component: membrane part (GO:0044425);; cellular component: cell part (GO:0044464);; cellular component: organelle (GO:0043226);; cellular component: organelle part (GO:0044422);; biological process: metabolic process (GO:0008152);; biological proc…
Niben101Ctg14184g00002	Niben101Ctg14184g00002	14.5668	12.8627	17.057	9.74114	7.02191	7.24668	8.98987	9.0976	9.49346	12.7922	13.9154	16.1225	0.000534	-0.83949	normal	0.63295	0.228056	normal	0.98716	-0.01803	normal	1.48e-05	-1.17485	down	6.8e-05	-0.89752	normal	[H]	Coenzyme transport and metabolism	Molecular Function: glutaminase activity (GO:0004359);; Cellular Component: cytosol (GO:0005829);; Biological Process: pyridoxine metabolic process (GO:0008614);; Biological Process: vitamin B6 biosynthetic process (GO:0042819);; Biological Process: pyridoxal phosphate biosynthetic process (GO:0042823);; Molecular Function: protein heterodimerization activity (GO:0046982);; Cellular Component: gl…	K08681|4.66764e-51|sot:102605133|K08681 5'-phosphate synthase pdxT subunit [EC:4.3.3.6] | (RefSeq) probable pyridoxal 5'-phosphate synthase subunit PDX2	Vitamin B6 metabolism (ko00750)	[H]	Coenzyme transport and metabolism	SNO glutamine amidotransferase family	Probable pyridoxal 5&apos;-phosphate synthase subunit PDX2 OS=Arabidopsis thaliana OX=3702 GN=PDX2 PE=1 SV=1	H	Coenzyme transport and metabolism	PREDICTED: probable pyridoxal 5&apos;-phosphate synthase subunit PDX2 [Nicotiana tabacum]	molecular function: catalytic activity (GO:0003824);; cellular component: cell (GO:0005623);; cellular component: cell part (GO:0044464);; biological process: metabolic process (GO:0008152);; biological process: cellular process (GO:0009987);; biological process: single-organism process (GO:0044699);; molecular function: binding (GO:0005488);; cellular component: macromolecular complex (GO:003299…
Niben101Ctg14450g00003	Niben101Ctg14450g00003	3.18072	1.53717	3.90391	0.790312	1.06128	0.623376	4.37468	3.93212	1.5963	2.44955	3.27555	4.60027	0.966504	-0.03428	normal	0.00041	1.46686	up	0.799734	-0.1764	normal	1.07e-09	-2.18073	down	0.537405	-0.30734	normal	--	--	--	--	--	--	--	--	--	--	--	PREDICTED: keratin-associated protein 21-1-like [Nicotiana tabacum]	--
Niben101Ctg14566g00003	Niben101Ctg14566g00003	35.931	32.6936	32.5496	115.493	103.899	132.487	60.5217	97.0581	97.5276	41.0158	43.3955	36.1316	5.87e-07	1.00145	up	0.267039	-0.36462	normal	0.142778	-0.30115	normal	4.43e-11	1.09068	up	0.000906	0.692739	normal	[P]	Inorganic ion transport and metabolism	Molecular Function: superoxide dismutase activity (GO:0004784);; Molecular Function: copper ion binding (GO:0005507);; Cellular Component: nucleus (GO:0005634);; Cellular Component: cytosol (GO:0005829);; Molecular Function: zinc ion binding (GO:0008270);; Biological Process: removal of superoxide radicals (GO:0019430);; Biological Process: oxidation-reduction process (GO:0055114);;	K04565|2.33338e-54|spen:107007989|K04565 superoxide dismutase, Cu-Zn family [EC:1.15.1.1] | (RefSeq) superoxide dismutase [Cu-Zn] 2	Peroxisome (ko04146)	[P]	Inorganic ion transport and metabolism	Copper/zinc superoxide dismutase (SODC)	Superoxide dismutase [Cu-Zn] OS=Nicotiana plumbaginifolia OX=4092 GN=SODCC PE=2 SV=2	P	Inorganic ion transport and metabolism	PREDICTED: superoxide dismutase [Cu-Zn] isoform X1 [Nicotiana tabacum]	biological process: metabolic process (GO:0008152);; biological process: cellular process (GO:0009987);; biological process: single-organism process (GO:0044699);; biological process: response to stimulus (GO:0050896);; biological process: detoxification (GO:0098754);; molecular function: catalytic activity (GO:0003824);; molecular function: antioxidant activity (GO:0016209);; molecular function:…
Niben101Ctg14678g00001	Niben101Ctg14678g00001	1.86268	1.20107	0.572166	1.96323	2.04444	1.41118	1.11694	1.10261	1.69167	0.341731	0.920558	0.393921	0.918009	-0.07973	normal	0.620816	-0.29887	normal	--	--	--	0.031523	1.03212	up	--	--	--	[C]	Energy production and conversion	Cellular Component: mitochondrial intermembrane space (GO:0005758);; Molecular Function: oxidoreductase activity (GO:0016491);; Biological Process: oxidation-reduction process (GO:0055114);;	K17871|2.89326e-98|sot:102591773|K17871 NADH:ubiquinone reductase (non-electrogenic) [EC:1.6.5.9] | (RefSeq) ndb1; external alternative NAD(P)H-ubiquinone oxidoreductase B1, mitochondrial-like	--	[C]	Energy production and conversion	Pyridine nucleotide-disulphide oxidoreductase	External alternative NAD(P)H-ubiquinone oxidoreductase B1, mitochondrial OS=Solanum tuberosum OX=4113 GN=NDB1 PE=1 SV=1	C	Energy production and conversion	PREDICTED: external alternative NAD(P)H-ubiquinone oxidoreductase B1, mitochondrial [Nicotiana sylvestris]	cellular component: cell (GO:0005623);; cellular component: membrane-enclosed lumen (GO:0031974);; cellular component: organelle (GO:0043226);; cellular component: organelle part (GO:0044422);; cellular component: cell part (GO:0044464);; molecular function: catalytic activity (GO:0003824);; biological process: metabolic process (GO:0008152);; biological process: single-organism process (GO:00446…
Niben101Ctg14682g00001	Niben101Ctg14682g00001	48.2784	51.9106	53.7976	34.7586	21.8775	24.9671	52.4076	33.0504	47.3397	72.3517	61.8717	76.59	0.097473	-0.42518	normal	0.052366	0.669485	normal	0.039863	-0.45838	normal	7.38e-12	-1.69418	down	1.14e-05	-0.9401	normal	--	--	Cellular Component: chloroplast thylakoid membrane (GO:0009535);; Cellular Component: chloroplast envelope (GO:0009941);;	--	--	--	--	Thylakoid soluble phosphoprotein TSP9	--	S	Function unknown	PREDICTED: uncharacterized protein LOC109205410 [Nicotiana attenuata]	cellular component: cell (GO:0005623);; cellular component: membrane (GO:0016020);; cellular component: organelle (GO:0043226);; cellular component: organelle part (GO:0044422);; cellular component: cell part (GO:0044464)
Niben101Ctg14686g00002	Niben101Ctg14686g00002	6.92485	10.2111	9.46603	7.77668	12.6654	12.022	24.903	13.8415	16.2182	4.73137	5.50844	5.03712	0.042463	0.660404	normal	0.049955	0.721507	normal	0.170846	0.48031	normal	0.057048	0.597913	normal	1.09e-06	1.30823	up	--	--	--	--	--	--	--	--	Nodulin-related protein 1 OS=Arabidopsis thaliana OX=3702 GN=NRP1 PE=1 SV=1	S	Function unknown	PREDICTED: nodulin-related protein 1-like [Nicotiana tomentosiformis]	--
Niben101Ctg14751g00004	Niben101Ctg14751g00004	1.67049	1.11691	1.07743	3.90255	3.42436	3.94606	1.09615	2.2023	2.35629	1.13479	0.688167	0.432968	0.72109	0.219336	normal	0.069907	-0.75218	normal	0.607719	0.271215	normal	1.5e-05	1.63148	up	0.139489	0.674679	normal	--	--	Biological Process: transcription from plastid promoter (GO:0042793);;	--	--	--	--	--	Pentatricopeptide repeat-containing protein At5g67570, chloroplastic OS=Arabidopsis thaliana OX=3702 GN=DG1 PE=1 SV=2	S	Function unknown	PREDICTED: pentatricopeptide repeat-containing protein At5g67570, chloroplastic isoform X2 [Nicotiana attenuata]	biological process: metabolic process (GO:0008152);; biological process: cellular process (GO:0009987)
Niben101Ctg14777g00001	Niben101Ctg14777g00001	56.1412	51.5064	68.13	20.1927	9.36021	13.3706	28.8404	32.2715	25.3169	79.5227	65.6284	87.8451	4.59e-10	-1.17964	down	0.01056	0.903535	normal	0.132729	-0.40588	normal	2.02e-20	-2.63267	down	4.74e-19	-1.66596	down	[G]	Carbohydrate transport and metabolism	Biological Process: glucose metabolic process (GO:0006006);; Cellular Component: chloroplast (GO:0009507);; Molecular Function: oxidoreductase activity, acting on the aldehyde or oxo group of donors, NAD or NADP as acceptor (GO:0016620);; Molecular Function: NADP binding (GO:0050661);; Molecular Function: NAD binding (GO:0051287);; Biological Process: oxidation-reduction process (GO:0055114);;	K05298|1.28918e-75|sot:102606161|K05298 glyceraldehyde-3-phosphate dehydrogenase (NADP+) (phosphorylating) [EC:1.2.1.13] | (RefSeq) glyceraldehyde-3-phosphate dehydrogenase B, chloroplastic	Carbon fixation in photosynthetic organisms (ko00710);; Carbon metabolism (ko01200)	[G]	Carbohydrate transport and metabolism	Glyceraldehyde 3-phosphate dehydrogenase, NAD binding domain	Glyceraldehyde-3-phosphate dehydrogenase B, chloroplastic OS=Pisum sativum OX=3888 GN=GAPB PE=1 SV=2	G	Carbohydrate transport and metabolism	PREDICTED: glyceraldehyde-3-phosphate dehydrogenase B, chloroplastic-like [Nicotiana sylvestris]	biological process: metabolic process (GO:0008152);; biological process: single-organism process (GO:0044699);; cellular component: cell (GO:0005623);; cellular component: organelle (GO:0043226);; cellular component: cell part (GO:0044464);; molecular function: catalytic activity (GO:0003824);; molecular function: binding (GO:0005488)
Niben101Ctg14895g00002	Niben101Ctg14895g00002	0.051198	14.1206	16.0658	10.82	10.2351	12.0321	0.124354	0	0.047532	12.5932	0	14.5011	--	--	--	4.43e-39	-4.39827	down	0.996411	0.001241	normal	0.955325	-0.0462	normal	--	--	--	--	--	Molecular Function: GTP binding (GO:0005525);;	--	--	--	--	--	--	S	Function unknown	plastid GTPase Der [Nicotiana benthamiana]	molecular function: binding (GO:0005488)
Niben101Ctg15010g00002	Niben101Ctg15010g00002	0.140112	0	0.208376	0.176123	0	0.195373	2.10438	1.1719	1.09782	0.084789	1.13949	0.263089	9.38e-06	1.67243	up	2.01e-05	1.86521	up	--	--	--	--	--	--	0.139896	0.722134	normal	--	--	Biological Process: transcription, DNA-templated (GO:0006351);;	--	--	--	--	AP2 domain	Ethylene-responsive transcription factor ABR1 OS=Arabidopsis thaliana OX=3702 GN=ABR1 PE=2 SV=1	K	Transcription	PREDICTED: ethylene-responsive transcription factor ABR1-like isoform X1 [Nicotiana sylvestris]	biological process: metabolic process (GO:0008152);; biological process: cellular process (GO:0009987)
Niben101Ctg15110g00004	Niben101Ctg15110g00004	0.106284	0.655798	0.226782	0.475994	1.25965	0.70657	0.126962	0.222435	0.409792	0.269787	0.294661	0.107709	--	--	--	0.037631	-1.02841	down	--	--	--	0.020688	1.11645	up	--	--	--	--	--	Molecular Function: beta-galactosidase activity (GO:0004565);; Cellular Component: vacuole (GO:0005773);; Biological Process: carbohydrate metabolic process (GO:0005975);; Cellular Component: plant-type cell wall (GO:0009505);; Molecular Function: carbohydrate binding (GO:0030246);;	--	--	[G]	Carbohydrate transport and metabolism	--	Beta-galactosidase 10 OS=Arabidopsis thaliana OX=3702 GN=BGAL10 PE=2 SV=1	G	Carbohydrate transport and metabolism	PREDICTED: beta-galactosidase 3-like [Nicotiana attenuata]	molecular function: catalytic activity (GO:0003824);; cellular component: cell (GO:0005623);; cellular component: organelle (GO:0043226);; cellular component: cell part (GO:0044464);; biological process: metabolic process (GO:0008152);; molecular function: binding (GO:0005488)
Niben101Ctg15114g00004	Niben101Ctg15114g00004	11.4141	14.6359	9.82803	20.2726	33.0201	19.9857	6.48295	9.99069	14.2178	7.38086	8.32282	7.1696	0.249826	-0.4056	normal	0.001814	-1.01515	down	0.037236	0.479813	normal	2.27e-08	1.1872	up	0.871284	0.073454	normal	[O]	Posttranslational modification, protein turnover, chaperones	Molecular Function: serine-type endopeptidase activity (GO:0004252);; Cellular Component: cell wall (GO:0005618);; Biological Process: proteolysis (GO:0006508);;	--	--	--	--	Subtilase family;; PA domain	Subtilisin-like protease SBT1.8 OS=Arabidopsis thaliana OX=3702 GN=SBT1.8 PE=1 SV=1	O	Posttranslational modification, protein turnover, chaperones	PREDICTED: subtilisin-like protease [Nicotiana sylvestris]	biological process: metabolic process (GO:0008152);; molecular function: catalytic activity (GO:0003824);; cellular component: cell (GO:0005623);; cellular component: cell part (GO:0044464)
Niben101Ctg15201g00002	Niben101Ctg15201g00002	3.09377	2.43869	1.82799	5.42121	8.09084	5.34155	2.57434	3.57977	3.90462	1.7186	1.93612	1.57706	0.653703	0.186584	normal	0.008086	-0.74937	normal	0.420239	0.312288	normal	2.13e-10	1.3514	up	0.02217	0.558137	normal	--	--	--	--	--	--	--	Sin3 binding region of histone deacetylase complex subunit SAP30	--	S	Function unknown	PREDICTED: uncharacterized protein LOC104220816 [Nicotiana sylvestris]	--
Niben101Ctg15252g00002	Niben101Ctg15252g00002	95.8698	74.4411	78.8008	47.1587	42.6514	69.2327	119.533	80.9998	61.4353	85.3101	84.0818	121.264	0.729669	-0.15088	normal	0.055064	0.690067	normal	0.476839	-0.25519	normal	8.55e-07	-1.23674	down	0.148684	-0.44293	normal	--	--	--	K09422|4.53051e-31|spen:107003095|K09422 myb proto-oncogene protein, plant | (RefSeq) transcription factor MYB48	--	--	--	--	--	K	Transcription	PREDICTED: transcription factor MYB48-like [Nicotiana tabacum]	--
Niben101Ctg15426g00003	Niben101Ctg15426g00003	4.82737	2.63027	4.45019	4.64137	0	0.192938	2.28481	0.157512	0	0.084772	0.073404	0.233763	0.446033	-0.29413	normal	--	--	--	1.72e-11	1.46081	up	--	--	--	--	--	--	--	--	--	--	--	[R]	General function prediction only	--	--	S	Function unknown	PREDICTED: uncharacterized protein LOC107807443 [Nicotiana tabacum]	--
Niben101Ctg15435g00001	Niben101Ctg15435g00001	11.1576	10.0686	11.9357	8.82341	6.38372	4.83748	4.62638	7.40248	7.02136	12.9719	10.1125	11.2423	0.000273	-0.92145	normal	0.992451	-0.00763	normal	0.875321	-0.10444	normal	0.000279	-1.1126	down	2.25e-05	-1.06932	down	--	--	Molecular Function: magnesium ion binding (GO:0000287);; Molecular Function: inorganic diphosphatase activity (GO:0004427);; Cellular Component: cytoplasm (GO:0005737);; Biological Process: phosphate-containing compound metabolic process (GO:0006796);;	K01507|8.03933e-35|vvi:100253976|K01507 inorganic pyrophosphatase [EC:3.6.1.1] | (RefSeq) soluble inorganic pyrophosphatase 6, chloroplastic	Oxidative phosphorylation (ko00190)	[C]	Energy production and conversion	Inorganic pyrophosphatase	Soluble inorganic pyrophosphatase 6, chloroplastic OS=Arabidopsis thaliana OX=3702 GN=PPA6 PE=1 SV=1	C	Energy production and conversion	hypothetical protein CRG98_041741 [Punica granatum]	molecular function: binding (GO:0005488);; molecular function: catalytic activity (GO:0003824);; cellular component: cell (GO:0005623);; cellular component: cell part (GO:0044464);; biological process: metabolic process (GO:0008152);; biological process: cellular process (GO:0009987)
Niben101Ctg15635g00003	Niben101Ctg15635g00003	2.08269	1.37697	1.84952	1.31454	3.49582	2.16113	7.84554	6.45615	3.90217	0.636326	0.577856	1.02857	0.001461	1.11292	up	0.011266	1.09764	up	--	--	--	--	--	--	3.93e-08	1.9085	up	--	--	--	--	--	[R]	General function prediction only	C2H2-type zinc finger;; C2H2-type zinc finger;; Zinc-finger double-stranded RNA-binding	Zinc finger protein ZAT11 OS=Arabidopsis thaliana OX=3702 GN=ZAT11 PE=2 SV=1	S	Function unknown	PREDICTED: zinc finger protein ZAT11-like [Nicotiana sylvestris]	--
Niben101Ctg15651g00003	Niben101Ctg15651g00003	3.6886	3.59472	3.86893	3.4484	2.81061	2.88014	1.70711	1.5793	2.99713	3.73181	4.0072	4.27875	0.006373	-0.8762	normal	0.447469	-0.38999	normal	0.835521	-0.13622	normal	0.006274	-0.76884	normal	0.000242	-1.08624	down	[M]	Cell wall/membrane/envelope biogenesis	Molecular Function: cinnamoyl-CoA reductase activity (GO:0016621);; Molecular Function: coenzyme binding (GO:0050662);; Biological Process: oxidation-reduction process (GO:0055114);;	K09753|0|sly:778359|K09753 cinnamoyl-CoA reductase [EC:1.2.1.44] | (RefSeq) CCR2; cinnamoyl-CoA reductase	Phenylpropanoid biosynthesis (ko00940)	[V]	Defense mechanisms	NAD dependent epimerase/dehydratase family;; 3-beta hydroxysteroid dehydrogenase/isomerase family;; NAD(P)H-binding;; GDP-mannose 4,6 dehydratase;; NmrA-like family;; Male sterility protein;; Polysaccharide biosynthesis protein;; KR domain	Cinnamoyl-CoA reductase 1 OS=Arabidopsis thaliana OX=3702 GN=CCR1 PE=1 SV=1	M	Cell wall/membrane/envelope biogenesis	PREDICTED: cinnamoyl-CoA reductase 1-like [Nicotiana tabacum]	biological process: metabolic process (GO:0008152);; biological process: single-organism process (GO:0044699);; molecular function: catalytic activity (GO:0003824);; molecular function: binding (GO:0005488)
Niben101Ctg15694g00007	Niben101Ctg15694g00007	8.04349	7.89096	9.7005	6.29773	5.81793	3.9083	8.80057	8.23788	7.04078	10.0491	11.0558	11.9114	0.257148	-0.31277	normal	0.077483	0.586443	normal	0.179707	-0.36893	normal	6.33e-09	-1.39329	down	5.44e-05	-0.75176	normal	--	--	--	--	--	--	--	Putative quorum-sensing-regulated virulence factor	--	S	Function unknown	PREDICTED: uncharacterized protein LOC107788870 [Nicotiana tabacum]	--
Niben101Ctg15717g00003	Niben101Ctg15717g00003	0.287158	1.04904	0.623009	2.41509	6.06422	2.52623	0.192865	0.618151	0.85505	0.347703	0.547069	0.160571	0.683046	-0.26913	normal	7.53e-06	-1.80257	down	0.577426	0.274507	normal	1.09e-09	2.44047	up	0.767823	0.19595	normal	[R]	General function prediction only	Biological Process: lipid catabolic process (GO:0016042);; Molecular Function: hydrolase activity (GO:0016787);;	--	--	[I]	Lipid transport and metabolism	Patatin-like phospholipase	Patatin-like protein 7 OS=Arabidopsis thaliana OX=3702 GN=PLP7 PE=2 SV=1	S	Function unknown	PREDICTED: patatin-like protein 3 [Nicotiana sylvestris]	biological process: metabolic process (GO:0008152);; biological process: single-organism process (GO:0044699);; molecular function: catalytic activity (GO:0003824)
Niben101Ctg15807g00002	Niben101Ctg15807g00002	22.0385	12.0897	11.7582	9.69104	6.67356	25.1755	8.60826	4.56003	8.41504	13.9337	14.3833	14.198	0.000126	-1.10558	down	0.221635	-0.64032	normal	0.985715	0.019085	normal	0.380472	-0.40741	normal	1.82e-07	-1.19795	down	--	--	Molecular Function: (R,R)-butanediol dehydrogenase activity (GO:0000721);; Molecular Function: DNA binding (GO:0003677);; Cellular Component: nucleus (GO:0005634);; Biological Process: regulation of transcription, DNA-templated (GO:0006355);; Biological Process: oxidation-reduction process (GO:0055114);;	--	--	--	--	No apical meristem (NAM) protein	NAC domain-containing protein 72 OS=Arabidopsis thaliana OX=3702 GN=NAC072 PE=2 SV=1	K	Transcription	PREDICTED: NAC domain-containing protein 72-like [Nicotiana tomentosiformis]	biological process: metabolic process (GO:0008152);; biological process: single-organism process (GO:0044699);; molecular function: catalytic activity (GO:0003824);; molecular function: binding (GO:0005488);; cellular component: cell (GO:0005623);; cellular component: organelle (GO:0043226);; cellular component: cell part (GO:0044464);; biological process: biological regulation (GO:0065007)
Niben101Ctg15836g00002	Niben101Ctg15836g00002	0.985376	1.229	0.87166	0.964757	1.22061	1.2768	0.302834	0.471371	0.917359	0.40269	0.295733	0.356642	0.047593	-0.79204	normal	0.140536	-0.71736	normal	0.005868	0.796107	normal	0.001265	1.12694	up	--	--	--	--	--	Molecular Function: transcription cofactor activity (GO:0003712);; Molecular Function: histone acetyltransferase activity (GO:0004402);; Cellular Component: nucleus (GO:0005634);; Biological Process: regulation of transcription, DNA-templated (GO:0006355);; Molecular Function: zinc ion binding (GO:0008270);; Biological Process: histone acetylation (GO:0016573);;	--	--	[K]	Transcription	TAZ zinc finger;; BTB/POZ domain	BTB/POZ and TAZ domain-containing protein 1 OS=Arabidopsis thaliana OX=3702 GN=BT1 PE=1 SV=1	BK	Chromatin structure and dynamics;; Transcription	PREDICTED: BTB/POZ and TAZ domain-containing protein 1 [Nicotiana sylvestris]	biological process: biological regulation (GO:0065007);; molecular function: transcription factor activity, protein binding (GO:0000988);; molecular function: catalytic activity (GO:0003824);; cellular component: cell (GO:0005623);; cellular component: organelle (GO:0043226);; cellular component: cell part (GO:0044464);; molecular function: binding (GO:0005488);; biological process: metabolic pro…
Niben101Ctg15964g00001	Niben101Ctg15964g00001	2.63093	2.68548	3.63965	1.68095	1.8278	0.629986	0.638718	1.91889	1.80764	2.03533	2.88948	2.33185	0.034347	-0.86278	normal	0.9333	0.083317	normal	0.875925	0.125206	normal	0.027195	-1.01532	down	0.0659	-0.77358	normal	--	--	--	--	--	--	--	--	--	S	Function unknown	PREDICTED: methyl-CpG-binding domain-containing protein 7-like isoform X2 [Nicotiana tabacum]	--
Niben101Ctg16016g00003	Niben101Ctg16016g00003	10.7629	8.98601	8.83152	5.87421	3.57117	4.00476	7.20241	5.19284	7.41661	6.7912	12.416	9.40019	0.001191	-0.70943	normal	0.169748	0.5357	normal	0.940884	-0.05657	normal	1.36e-06	-1.38159	down	0.001207	-0.78134	normal	--	--	--	--	--	--	--	Protein of unknown function (DUF1635)	--	S	Function unknown	PREDICTED: uncharacterized protein LOC107803406 isoform X2 [Nicotiana tabacum]	--
Niben101Ctg16098g00002	Niben101Ctg16098g00002	250.149	253.946	256.744	137.005	118.795	148.425	162.398	149.776	135.688	244.834	267.113	274.182	7.03e-14	-0.97649	normal	0.462533	0.207331	normal	0.696662	-0.11689	normal	6.53e-18	-1.35689	down	1.07e-17	-1.11797	down	[G]	Carbohydrate transport and metabolism	Molecular Function: transporter activity (GO:0005215);; Biological Process: transport (GO:0006810);; Cellular Component: integral component of membrane (GO:0016021);;	K09872|1.67115e-142|sind:105160904|K09872 aquaporin PIP | (RefSeq) probable aquaporin PIP1-5	--	[G]	Carbohydrate transport and metabolism	Major intrinsic protein	Probable aquaporin PIP1-5 OS=Arabidopsis thaliana OX=3702 GN=PIP1-5 PE=1 SV=2	G	Carbohydrate transport and metabolism	probable aquaporin PIP1-2 [Nicotiana tabacum]	molecular function: transporter activity (GO:0005215);; biological process: localization (GO:0051179);; cellular component: membrane (GO:0016020);; cellular component: membrane part (GO:0044425)
Niben101Ctg16115g00003	Niben101Ctg16115g00003	15.9707	14.1135	21.9445	11.0934	12.8064	10.232	49.7337	31.0148	39.0264	12.2766	22.2081	11.6546	0.000523	0.84627	normal	2.2e-17	1.74876	up	0.901844	0.090062	normal	0.000923	-0.80773	normal	5.56e-05	0.958644	normal	--	--	Molecular Function: transcription factor activity, sequence-specific DNA binding (GO:0003700);; Biological Process: regulation of transcription, DNA-templated (GO:0006355);; Molecular Function: sequence-specific DNA binding (GO:0043565);;	--	--	--	--	WRKY DNA -binding domain	Probable WRKY transcription factor 40 OS=Arabidopsis thaliana OX=3702 GN=WRKY40 PE=1 SV=1	K	Transcription	probable WRKY transcription factor 40 [Nicotiana tabacum]	biological process: biological regulation (GO:0065007);; molecular function: nucleic acid binding transcription factor activity (GO:0001071);; molecular function: binding (GO:0005488)
Niben101Ctg16216g00002	Niben101Ctg16216g00002	22.0099	22.0257	28.2211	94.8451	106.855	133.345	59.6178	130.009	118.275	21.2458	22.1627	21.8918	1.66e-10	1.58524	up	0.950523	-0.04274	normal	0.917997	0.062068	normal	1.15e-32	1.87638	up	2.11e-13	1.70457	up	[J]	Translation, ribosomal structure and biogenesis	Molecular Function: structural constituent of ribosome (GO:0003735);; Cellular Component: ribosome (GO:0005840);; Biological Process: translation (GO:0006412);;	--	--	--	--	Ribosomal protein S21	30S ribosomal protein S21, chloroplastic OS=Spinacia oleracea OX=3562 GN=rps21 PE=1 SV=2	S	Function unknown	PREDICTED: uncharacterized protein LOC109216575 [Nicotiana attenuata]	molecular function: structural molecule activity (GO:0005198);; cellular component: cell (GO:0005623);; cellular component: macromolecular complex (GO:0032991);; cellular component: organelle (GO:0043226);; cellular component: cell part (GO:0044464);; biological process: metabolic process (GO:0008152);; biological process: cellular process (GO:0009987)
Niben101Ctg16222g00005	Niben101Ctg16222g00005	0.624483	0.730769	0.262323	0.750119	0.935341	1.27671	0.681726	1.01106	0.701588	0.119675	0.544467	0.250669	0.727512	0.222361	normal	0.771437	-0.18856	normal	0.66121	0.233431	normal	0.040481	1.01561	up	0.121438	0.713366	normal	[T]	Signal transduction mechanisms	Biological Process: signal transduction (GO:0007165);; Cellular Component: integral component of membrane (GO:0016021);;	--	--	[R]	General function prediction only	Ankyrin repeats (3 copies);; Ankyrin repeats (many copies);; Ankyrin repeat;; Domain of unknown function;; Ankyrin repeats (many copies);; Ankyrin repeat	Ankyrin repeat-containing protein ITN1 OS=Arabidopsis thaliana OX=3702 GN=ITN1 PE=1 SV=1	S	Function unknown	PREDICTED: protein ACCELERATED CELL DEATH 6-like [Nicotiana tabacum]	biological process: cellular process (GO:0009987);; biological process: biological regulation (GO:0065007);; cellular component: membrane (GO:0016020);; cellular component: membrane part (GO:0044425)
Niben101Ctg16278g00003	Niben101Ctg16278g00003	14.312	6.91309	5.48363	10.9231	15.0076	42.7497	12.7852	9.73444	8.65298	5.52894	6.23033	8.00474	0.990842	-0.00824	normal	0.108317	-0.7802	normal	0.739004	0.207344	normal	0.005949	1.14797	up	0.407154	0.280915	normal	[T]	Signal transduction mechanisms	Molecular Function: zinc ion binding (GO:0008270);;	--	--	--	--	Ankyrin repeats (many copies);; Ankyrin repeats (3 copies);; Ankyrin repeat;; Ankyrin repeat;; Ankyrin repeats (many copies)	Putative E3 ubiquitin-protein ligase XBAT31 OS=Arabidopsis thaliana OX=3702 GN=XBAT31 PE=2 SV=1	S	Function unknown	PREDICTED: putative E3 ubiquitin-protein ligase XBAT31 [Nicotiana attenuata]	molecular function: binding (GO:0005488)
Niben101Ctg16306g00002	Niben101Ctg16306g00002	3.5866	2.65	4.09284	2.51911	1.24635	1.54899	2.69957	2.45203	1.5276	3.86682	3.46735	4.34721	0.014916	-0.74348	normal	0.591741	0.308025	normal	0.707644	-0.19412	normal	5.69e-06	-1.41433	down	6.66e-05	-1.02406	down	[G]	Carbohydrate transport and metabolism	--	K05350|0|sot:102582742|K05350 beta-glucosidase [EC:3.2.1.21] | (RefSeq) beta-glucosidase 18-like	Cyanoamino acid metabolism (ko00460);; Starch and sucrose metabolism (ko00500);; Phenylpropanoid biosynthesis (ko00940)	[G]	Carbohydrate transport and metabolism	Glycosyl hydrolase family 1;; Cellulase (glycosyl hydrolase family 5)	Beta-glucosidase 18 OS=Oryza sativa subsp. japonica OX=39947 GN=BGLU18 PE=3 SV=2	G	Carbohydrate transport and metabolism	PREDICTED: beta-glucosidase 18-like [Nicotiana sylvestris]	--
Niben101Ctg16325g00005	Niben101Ctg16325g00005	0.470572	0.477915	0.272559	0.521874	3.50693	0.755377	0.318491	0.32355	0.530423	0.264777	0.457643	0.370331	0.744327	-0.2015	normal	0.025882	-1.11957	down	0.974147	0.03483	normal	0.016285	1.24099	up	0.756872	-0.17292	normal	--	--	Molecular Function: microtubule motor activity (GO:0003777);; Molecular Function: ATP binding (GO:0005524);; Cellular Component: kinesin complex (GO:0005871);; Cellular Component: microtubule (GO:0005874);; Biological Process: microtubule-based movement (GO:0007018);; Molecular Function: microtubule binding (GO:0008017);; Molecular Function: ATPase activity (GO:0016887);;	K10401|0|sot:102598036|K10401 kinesin family member 18/19 | (RefSeq) kinesin-like protein KIF18B	--	[Z]	Cytoskeleton	Kinesin motor domain;; Microtubule binding	Kinesin-like protein KIN-8A OS=Arabidopsis thaliana OX=3702 GN=KIN8A PE=3 SV=1	Z	Cytoskeleton	PREDICTED: kinesin-like protein KIF22 isoform X1 [Nicotiana tabacum]	molecular function: catalytic activity (GO:0003824);; molecular function: binding (GO:0005488);; cellular component: cell (GO:0005623);; cellular component: macromolecular complex (GO:0032991);; cellular component: organelle (GO:0043226);; cellular component: organelle part (GO:0044422);; cellular component: cell part (GO:0044464);; cellular component: supramolecular complex (GO:0099080);; biolog…
Niben101Ctg16346g00003	Niben101Ctg16346g00003	5.34866	3.91782	5.2687	3.85636	2.26409	0.517311	1.33621	1.46775	2.47468	7.53795	7.13847	5.17466	4.76e-08	-1.44092	down	0.843089	-0.16982	normal	0.195303	-0.40853	normal	0.040818	-1.22108	down	1.46e-15	-1.97762	down	[T]	Signal transduction mechanisms	Molecular Function: acid phosphatase activity (GO:0003993);; Biological Process: dephosphorylation (GO:0016311);; Molecular Function: metal ion binding (GO:0046872);;	--	--	[G]	Carbohydrate transport and metabolism	Calcineurin-like phosphoesterase;; Purple acid Phosphatase, N-terminal domain;; Iron/zinc purple acid phosphatase-like protein C	Purple acid phosphatase 2 OS=Ipomoea batatas OX=4120 GN=PAP2 PE=1 SV=1	S	Function unknown	PREDICTED: purple acid phosphatase 2-like [Nicotiana sylvestris]	biological process: metabolic process (GO:0008152);; biological process: cellular process (GO:0009987);; molecular function: catalytic activity (GO:0003824);; molecular function: binding (GO:0005488)
Niben101Ctg16385g00003	Niben101Ctg16385g00003	1.57077	0.630627	1.00753	0.365062	1.41549	1.10164	10.7737	5.63173	5.30697	0.042307	0.068617	0.313698	2.24e-08	1.80984	up	7.03e-09	2.1545	up	--	--	--	--	--	--	5.28e-23	3.40392	up	--	--	Molecular Function: DNA binding (GO:0003677);; Molecular Function: transcription factor activity, sequence-specific DNA binding (GO:0003700);; Cellular Component: nucleus (GO:0005634);; Biological Process: regulation of transcription, DNA-templated (GO:0006355);;	K09286|4.96747e-80|spen:107013877|K09286 EREBP-like factor | (RefSeq) dehydration-responsive element-binding protein 1A-like	--	--	--	AP2 domain	Dehydration-responsive element-binding protein 1A OS=Arabidopsis thaliana OX=3702 GN=DREB1A PE=1 SV=2	K	Transcription	PREDICTED: dehydration-responsive element-binding protein 1A-like [Nicotiana sylvestris]	molecular function: binding (GO:0005488);; biological process: biological regulation (GO:0065007);; molecular function: nucleic acid binding transcription factor activity (GO:0001071);; cellular component: cell (GO:0005623);; cellular component: organelle (GO:0043226);; cellular component: cell part (GO:0044464)
Niben101Ctg16445g00004	Niben101Ctg16445g00004	2.1297	2.57503	1.13858	2.92763	4.98217	4.88747	1.56711	1.75741	2.32037	0.624796	0.852879	0.837812	0.683802	-0.22716	normal	0.00556	-0.94147	normal	0.059258	0.617529	normal	7.2e-09	1.82012	up	0.038742	0.752073	normal	--	--	--	--	--	--	--	--	--	S	Function unknown	PREDICTED: uncharacterized protein At3g17950-like [Nicotiana attenuata]	--
Niben101Scf00005g01008	Niben101Scf00005g01008	0.998438	0.880076	0.966939	2.77001	3.81913	2.71232	1.96732	1.61087	2.41238	0.669002	1.49955	0.859776	0.002221	0.742166	normal	0.091813	-0.50853	normal	0.90112	-0.09931	normal	7.21e-05	1.11815	up	0.062463	0.580795	normal	--	--	Cellular Component: cytosol (GO:0005829);; Biological Process: rRNA processing (GO:0006364);; Biological Process: tRNA export from nucleus (GO:0006409);; Cellular Component: small-subunit processome (GO:0032040);; Cellular Component: CURI complex (GO:0032545);; Cellular Component: UTP-C complex (GO:0034456);;	K14544|0|spen:107008763|K14544 U3 small nucleolar RNA-associated protein 22 | (RefSeq) nucleolar protein 6	Ribosome biogenesis in eukaryotes (ko03008)	[S]	Function unknown	Nrap protein PAP/OAS1-like domain 5;; Nrap protein nucleotidyltransferase domain 4;; Nrap protein domain 1;; Nrap protein PAP/OAS-like domain;; Nrap protein domain 3;; Nrap protein domain 6	--	S	Function unknown	PREDICTED: nucleolar protein 6 [Nicotiana tabacum]	cellular component: cell (GO:0005623);; cellular component: cell part (GO:0044464);; biological process: metabolic process (GO:0008152);; biological process: cellular process (GO:0009987);; biological process: single-organism process (GO:0044699);; biological process: localization (GO:0051179);; cellular component: macromolecular complex (GO:0032991);; cellular component: organelle (GO:0043226);;…
Niben101Scf00013g01005	Niben101Scf00013g01005	1.58186	2.00257	1.49122	3.5909	5.0283	3.41317	2.86431	2.81114	2.93314	1.06391	1.34065	1.11176	0.028826	0.480527	normal	0.174398	-0.37845	normal	0.289092	0.355992	normal	6.63e-10	1.2847	up	2.82e-07	0.903286	normal	--	--	Molecular Function: DNA binding (GO:0003677);; Cellular Component: nucleus (GO:0005634);; Molecular Function: lipid binding (GO:0008289);;	K09338|0|sly:101246802|K09338 homeobox-leucine zipper protein | (RefSeq) homeobox-leucine zipper protein ATHB-15	--	--	--	START domain;; MEKHLA domain;; Homeobox domain	Homeobox-leucine zipper protein ATHB-15 OS=Arabidopsis thaliana OX=3702 GN=ATHB-15 PE=1 SV=1	K	Transcription	PREDICTED: homeobox-leucine zipper protein ATHB-15-like [Nicotiana attenuata]	molecular function: binding (GO:0005488);; cellular component: cell (GO:0005623);; cellular component: organelle (GO:0043226);; cellular component: cell part (GO:0044464)
Niben101Scf00021g01007	Niben101Scf00021g01007	0.534471	0.750388	0.278968	2.86107	1.48039	2.18433	1.10255	0.655012	1.34275	0.128873	0.220016	0.244151	0.327563	0.491057	normal	0.090513	-0.77693	normal	--	--	--	1.75e-09	2.46986	up	0.000586	1.35221	up	--	--	--	--	--	--	--	MYB-CC type transfactor, LHEQLE motif;; Myb-like DNA-binding domain	Myb-related protein 2 OS=Arabidopsis thaliana OX=3702 GN=MYR2 PE=1 SV=1	K	Transcription	PREDICTED: uncharacterized protein LOC104231721 [Nicotiana sylvestris]	--
Niben101Scf00021g01016	Niben101Scf00021g01016	0.55196	1.09199	0.576565	1.94369	2.91074	2.19276	0.719989	0.585927	0.709997	0.422348	0.480318	0.793759	--	--	--	0.00076	-1.30644	down	--	--	--	0.001804	1.33497	up	--	--	--	--	--	--	--	--	--	--	ZF-HD protein dimerisation region	Zinc-finger homeodomain protein 11 OS=Arabidopsis thaliana OX=3702 GN=ZHD11 PE=1 SV=1	S	Function unknown	PREDICTED: zinc-finger homeodomain protein 9-like [Nicotiana sylvestris]	--
Niben101Scf00022g04003	Niben101Scf00022g04003	9.37353	8.37351	7.80735	5.7657	5.24991	6.43616	5.71198	5.54678	4.99496	11.2698	8.22731	8.18003	1.89e-06	-0.84369	normal	0.951342	-0.03139	normal	0.744012	-0.16432	normal	1.01e-05	-1.05075	down	1.75e-06	-1.03053	down	[C]	Energy production and conversion	Biological Process: cytokinin metabolic process (GO:0009690);; Molecular Function: oxidoreductase activity, acting on CH-OH group of donors (GO:0016614);; Molecular Function: cytokinin dehydrogenase activity (GO:0019139);; Molecular Function: flavin adenine dinucleotide binding (GO:0050660);; Biological Process: oxidation-reduction process (GO:0055114);;	K00279|0|spen:107026651|K00279 cytokinin dehydrogenase [EC:1.5.99.12] | (RefSeq) cytokinin dehydrogenase 7-like	Zeatin biosynthesis (ko00908)	[C]	Energy production and conversion	Cytokinin dehydrogenase 1, FAD and cytokinin binding	Cytokinin dehydrogenase 7 OS=Arabidopsis thaliana OX=3702 GN=CKX7 PE=1 SV=1	C	Energy production and conversion	PREDICTED: cytokinin dehydrogenase 7 [Nicotiana attenuata]	biological process: metabolic process (GO:0008152);; biological process: cellular process (GO:0009987);; biological process: biological regulation (GO:0065007);; biological process: single-organism process (GO:0044699);; molecular function: catalytic activity (GO:0003824);; molecular function: binding (GO:0005488)
Niben101Scf00023g03015	Niben101Scf00023g03015	2.09906	1.49388	2.54848	0.853304	1.06928	0.740094	1.30697	1.10584	0.814891	3.07742	2.27319	2.26178	0.002798	-0.95355	normal	0.604282	0.286775	normal	0.605429	-0.26056	normal	3.3e-10	-1.80342	down	6e-07	-1.36732	down	[IR]	Lipid transport and metabolism;; General function prediction only	Molecular Function: hydrolase activity, acting on ester bonds (GO:0016788);;	--	--	--	--	GDSL-like Lipase/Acylhydrolase	GDSL esterase/lipase At5g55050 OS=Arabidopsis thaliana OX=3702 GN=At5g55050 PE=2 SV=1	S	Function unknown	PREDICTED: GDSL esterase/lipase At5g55050-like [Nicotiana sylvestris]	molecular function: catalytic activity (GO:0003824)
Niben101Scf00023g05010	Niben101Scf00023g05010	0.229369	1.46844	0.058468	1.27952	2.66921	2.60793	0	0.14259	0.671817	0.062877	0.121626	0.028027	--	--	--	0.317221	-0.49817	normal	--	--	--	2.18e-17	3.47195	up	--	--	--	[G]	Carbohydrate transport and metabolism	Molecular Function: cellulase activity (GO:0008810);; Biological Process: cellulose catabolic process (GO:0030245);;	--	--	--	--	Glycosyl hydrolase family 9	Endoglucanase 11 OS=Arabidopsis thaliana OX=3702 GN=At2g32990 PE=2 SV=1	G	Carbohydrate transport and metabolism	PREDICTED: endoglucanase 11-like [Nicotiana attenuata]	molecular function: catalytic activity (GO:0003824);; biological process: metabolic process (GO:0008152);; biological process: cellular process (GO:0009987)
Niben101Scf00028g03005	Niben101Scf00028g03005	1.82563	1.4371	1.55232	0.800752	0.432952	0.835516	1.10279	1.14467	0	0.582977	0.516872	0.486891	0.719852	-0.16407	normal	0.968052	0.029602	normal	4.31e-07	1.08097	up	0.963707	-0.02823	normal	0.965752	0.025349	normal	--	--	Molecular Function: zinc ion binding (GO:0008270);;	--	--	[R]	General function prediction only	PPR repeat;; DYW family of nucleic acid deaminases;; PPR repeat family;; PPR repeat;; Pentatricopeptide repeat domain;; Pentacotripeptide-repeat region of PRORP	Pentatricopeptide repeat-containing protein At4g14820 OS=Arabidopsis thaliana OX=3702 GN=PCMP-H3 PE=2 SV=1	S	Function unknown	PREDICTED: pentatricopeptide repeat-containing protein At4g14820 [Nicotiana attenuata]	molecular function: binding (GO:0005488)
Niben101Scf00037g02016	Niben101Scf00037g02016	3.6795	3.57097	2.38712	11.2489	13.5267	12.5727	5.52747	5.45563	8.08906	3.29276	2.16433	2.4864	0.012529	0.659359	normal	0.000198	-0.83616	normal	0.848902	0.132084	normal	1.48e-14	1.70405	up	0.002121	0.811777	normal	--	--	Molecular Function: DNA binding (GO:0003677);; Cellular Component: nucleus (GO:0005634);;	--	--	--	--	SBP domain	Squamosa promoter-binding-like protein 9 OS=Arabidopsis thaliana OX=3702 GN=SPL9 PE=2 SV=2	K	Transcription	PREDICTED: squamosa promoter-binding-like protein 9 [Nicotiana attenuata]	molecular function: binding (GO:0005488);; cellular component: cell (GO:0005623);; cellular component: organelle (GO:0043226);; cellular component: cell part (GO:0044464)
Niben101Scf00046g02008	Niben101Scf00046g02008	1.72442	2.33681	1.68523	26.4823	20.4085	25.0692	7.02044	5.91591	15.6443	1.31295	2.97884	1.32299	4.3e-08	1.6289	up	0.003346	-1.0569	down	0.988408	-0.0186	normal	6.22e-30	3.03787	up	4.52e-07	1.61226	up	--	--	Molecular Function: DNA binding (GO:0003677);; Cellular Component: nucleus (GO:0005634);; Biological Process: regulation of transcription, DNA-templated (GO:0006355);;	--	--	--	--	No apical meristem (NAM) protein	SUPPRESSOR OF GAMMA RESPONSE 1 OS=Arabidopsis thaliana OX=3702 GN=SOG1 PE=1 SV=1	S	Function unknown	PREDICTED: NAC domain-containing protein 8-like [Nicotiana sylvestris]	molecular function: binding (GO:0005488);; cellular component: cell (GO:0005623);; cellular component: organelle (GO:0043226);; cellular component: cell part (GO:0044464);; biological process: biological regulation (GO:0065007)
Niben101Scf00046g05006	Niben101Scf00046g05006	1.24158	0.620497	1.90209	0.819367	0.30808	0.46043	3.68291	1.61715	2.25205	1.36777	3.93341	1.39164	0.308633	0.498545	normal	0.00014	1.5769	up	0.42492	-0.35908	normal	2.42e-05	-1.91046	down	0.880347	-0.09777	normal	--	--	Molecular Function: zinc ion binding (GO:0008270);; Cellular Component: integral component of membrane (GO:0016021);;	K10664|3.26273e-129|sot:102578856|K10664 E3 ubiquitin-protein ligase ATL6/9/15/31/42/55 [EC:2.3.2.27] | (RefSeq) E3 ubiquitin-protein ligase ATL6-like	--	[O]	Posttranslational modification, protein turnover, chaperones	Ring finger domain;; RING-like zinc finger;; Zinc finger, C3HC4 type (RING finger);; RING-H2 zinc finger domain;; Zinc finger, C3HC4 type (RING finger);; RING-type zinc-finger;; Anaphase-promoting complex subunit 11 RING-H2 finger	E3 ubiquitin-protein ligase ATL31 OS=Arabidopsis thaliana OX=3702 GN=ATL31 PE=1 SV=2	O	Posttranslational modification, protein turnover, chaperones	PREDICTED: E3 ubiquitin-protein ligase ATL31-like [Nicotiana tomentosiformis]	molecular function: binding (GO:0005488);; cellular component: membrane (GO:0016020);; cellular component: membrane part (GO:0044425)
Niben101Scf00046g08005	Niben101Scf00046g08005	2.07204	3.31186	2.38647	22.7436	11.0149	17.5146	5.80783	8.83319	22.1846	3.64465	4.27257	1.90413	9.15e-05	1.38358	up	0.634456	-0.3126	normal	0.719595	-0.22219	normal	3.98e-07	1.75438	up	0.002177	1.1543	up	--	--	--	--	--	--	--	--	--	S	Function unknown	PREDICTED: uncharacterized protein LOC109220509 [Nicotiana attenuata]	--
Niben101Scf00048g01007	Niben101Scf00048g01007	0.728051	0.692437	0.493338	0.995142	2.38301	1.01247	0.315785	0.780786	0.964544	0.273627	0.506225	0.471833	--	--	--	0.271253	-0.6379	normal	--	--	--	0.033509	1.04267	up	--	--	--	--	--	Biological Process: protein metabolic process (GO:0019538);;	--	--	[O]	Posttranslational modification, protein turnover, chaperones	Xylanase inhibitor N-terminal;; Xylanase inhibitor C-terminal	Probable aspartyl protease At4g16563 OS=Arabidopsis thaliana OX=3702 GN=At4g16563 PE=2 SV=1	O	Posttranslational modification, protein turnover, chaperones	PREDICTED: probable aspartyl protease At4g16563 [Nicotiana attenuata]	biological process: metabolic process (GO:0008152)
Niben101Scf00050g03001	Niben101Scf00050g03001	37.0039	26.133	32.5384	21.9576	17.8446	26.2545	37.5377	21.8544	21.5422	34.6447	31.9571	51.5333	0.212407	-0.42324	normal	0.50383	0.313445	normal	0.468408	-0.29443	normal	1.27e-05	-1.19286	down	0.007321	-0.78238	normal	[O]	Posttranslational modification, protein turnover, chaperones	--	--	--	[O]	Posttranslational modification, protein turnover, chaperones	Ubiquitin-conjugating enzyme	Ubiquitin-conjugating enzyme E2 8 OS=Arabidopsis thaliana OX=3702 GN=UBC8 PE=1 SV=1	O	Posttranslational modification, protein turnover, chaperones	PREDICTED: ubiquitin-conjugating enzyme E2 5B-like [Nicotiana tomentosiformis]	--
Niben101Scf00051g04021	Niben101Scf00051g04021	1.79944	3.24023	4.05929	2.62683	1.85885	1.02905	2.66768	2.11445	1.11828	4.1615	2.80079	3.33696	0.285597	-0.53711	normal	--	--	--	0.898837	-0.10772	normal	0.027348	-1.05845	down	0.059279	-0.80389	normal	--	--	--	--	--	--	--	Senescence regulator	--	S	Function unknown	PREDICTED: uncharacterized protein LOC104220620 [Nicotiana sylvestris]	--
Niben101Scf00057g00032	Niben101Scf00057g00032	56.5884	44.3481	41.2002	33.3313	33.0804	28.8911	36.4889	37.8829	37.4801	54.9365	47.3922	65.2495	0.000294	-0.56403	normal	0.139322	0.291434	normal	0.360395	-0.2798	normal	4.02e-10	-1.21268	down	2.14e-07	-0.88863	normal	[T]	Signal transduction mechanisms	Molecular Function: calmodulin-dependent protein kinase activity (GO:0004683);; Molecular Function: calcium ion binding (GO:0005509);; Molecular Function: calmodulin binding (GO:0005516);; Molecular Function: ATP binding (GO:0005524);; Cellular Component: nucleus (GO:0005634);; Cellular Component: cytoplasm (GO:0005737);; Cellular Component: plasma membrane (GO:0005886);; Biological Process: absc…	K13412|0|sly:101246133|K13412 calcium-dependent protein kinase [EC:2.7.11.1] | (RefSeq) calcium-dependent protein kinase 29	Plant-pathogen interaction (ko04626)	[T]	Signal transduction mechanisms	Protein kinase domain;; EF hand;; Protein tyrosine kinase;; EF-hand domain pair;; EF-hand domain;; EF-hand domain pair;; EF hand;; Cytoskeletal-regulatory complex EF hand;; Secreted protein acidic and rich in cysteine Ca binding region;; Copper binding proteins, plastocyanin/azurin family;; Cupredoxin-like domain	Calcium-dependent protein kinase 29 OS=Arabidopsis thaliana OX=3702 GN=CPK29 PE=2 SV=2	T	Signal transduction mechanisms	PREDICTED: calcium-dependent protein kinase 29-like [Nicotiana attenuata]	biological process: metabolic process (GO:0008152);; biological process: cellular process (GO:0009987);; molecular function: catalytic activity (GO:0003824);; molecular function: binding (GO:0005488);; cellular component: cell (GO:0005623);; cellular component: organelle (GO:0043226);; cellular component: cell part (GO:0044464);; cellular component: membrane (GO:0016020);; biological process: sig…
Niben101Scf00057g00035	Niben101Scf00057g00035	2.13272	0.805376	1.25959	1.1427	0.964213	1.59216	3.76605	3.35198	1.44301	1.1506	0.941132	1.65233	0.192732	0.572653	normal	0.014626	1.00401	up	0.970682	0.038315	normal	0.319463	-0.41012	normal	0.07938	0.671069	normal	--	--	--	--	--	[M]	Cell wall/membrane/envelope biogenesis	Mechanosensitive ion channel	Mechanosensitive ion channel protein 8 OS=Arabidopsis thaliana OX=3702 GN=MSL8 PE=2 SV=2	M	Cell wall/membrane/envelope biogenesis	PREDICTED: mechanosensitive ion channel protein 6-like [Nicotiana sylvestris]	--
Niben101Scf00058g08006	Niben101Scf00058g08006	4.31518	4.06137	4.28454	9.35791	12.2761	13.2155	5.40673	7.82456	9.94366	3.29939	3.48801	3.44634	0.034416	0.560274	normal	0.165916	-0.46441	normal	0.596081	0.195609	normal	7.4e-14	1.2911	up	0.001145	0.765218	normal	--	--	Molecular Function: ribonuclease P activity (GO:0004526);; Cellular Component: nucleolar ribonuclease P complex (GO:0005655);; Biological Process: gene silencing by RNA (GO:0031047);; Biological Process: RNA phosphodiester bond hydrolysis, endonucleolytic (GO:0090502);;	--	--	--	--	XS domain	Protein SUPPRESSOR OF GENE SILENCING 3 homolog OS=Oryza sativa subsp. japonica OX=39947 GN=SGS3 PE=3 SV=1	S	Function unknown	PREDICTED: uncharacterized protein LOC109225173 [Nicotiana attenuata]	biological process: metabolic process (GO:0008152);; biological process: cellular process (GO:0009987);; molecular function: catalytic activity (GO:0003824);; cellular component: cell (GO:0005623);; cellular component: membrane-enclosed lumen (GO:0031974);; cellular component: macromolecular complex (GO:0032991);; cellular component: organelle (GO:0043226);; cellular component: organelle part (GO…
Niben101Scf00059g03006	Niben101Scf00059g03006	1.84061	0.460875	1.02805	4.3684	3.61757	1.75151	0.68974	1.63711	1.89107	0.789316	0.961329	1.00996	0.947407	0.055425	normal	0.166123	-0.74939	normal	--	--	--	0.016285	1.11186	up	--	--	--	--	--	Molecular Function: metal ion binding (GO:0046872);;	--	--	--	--	--	--	S	Function unknown	PREDICTED: protein SODIUM POTASSIUM ROOT DEFECTIVE 3-like [Nicotiana attenuata]	molecular function: binding (GO:0005488)
Niben101Scf00062g01025	Niben101Scf00062g01025	1.3579	1.62593	2.36373	4.55822	5.0003	3.54753	3.48723	1.72299	2.26063	1.30126	1.52901	1.19053	0.765976	0.176489	normal	0.120101	-0.62019	normal	0.74339	0.205096	normal	6.84e-06	1.19013	up	0.215399	0.466462	normal	[F]	Nucleotide transport and metabolism	Cellular Component: cytosol (GO:0005829);; Biological Process: proteolysis (GO:0006508);; Molecular Function: peptidase activity (GO:0008233);; Biological Process: glucosinolate metabolic process (GO:0019760);;	--	--	[F]	Nucleotide transport and metabolism	Glutamine amidotransferase class-I;; Peptidase C26	Gamma-glutamyl peptidase 5 OS=Arabidopsis thaliana OX=3702 GN=GGP5 PE=2 SV=1	F	Nucleotide transport and metabolism	PREDICTED: gamma-glutamyl peptidase 5-like [Nicotiana attenuata]	cellular component: cell (GO:0005623);; cellular component: cell part (GO:0044464);; biological process: metabolic process (GO:0008152);; molecular function: catalytic activity (GO:0003824);; biological process: cellular process (GO:0009987);; biological process: single-organism process (GO:0044699)
Niben101Scf00063g01019	Niben101Scf00063g01019	8.7218	10.0695	11.6446	6.46364	7.32051	4.22617	8.54706	11.3112	7.73936	10.0601	10.8304	11.9194	0.203005	-0.35696	normal	0.0622	0.615864	normal	0.710054	-0.15845	normal	7.02e-08	-1.24002	down	0.007787	-0.55548	normal	--	--	Molecular Function: protein dimerization activity (GO:0046983);;	--	--	--	--	Helix-loop-helix DNA-binding domain	Transcription factor UNE10 OS=Arabidopsis thaliana OX=3702 GN=UNE10 PE=2 SV=1	--	--	PREDICTED: transcription factor UNE10-like isoform X2 [Nicotiana attenuata]	molecular function: binding (GO:0005488)
Niben101Scf00063g03008	Niben101Scf00063g03008	4.06816	6.35573	4.71838	9.13724	10.4333	7.16855	3.78196	4.00423	3.83155	3.90632	5.24946	3.34548	0.124427	-0.52508	normal	0.00038	-1.00166	down	0.866382	0.12627	normal	0.040397	0.617922	normal	0.259877	-0.38708	normal	--	--	--	--	--	--	--	Protein of unknown function, DUF538	Uncharacterized protein At5g01610 OS=Arabidopsis thaliana OX=3702 GN=At5g01610 PE=1 SV=1	S	Function unknown	PREDICTED: uncharacterized protein At5g01610-like [Nicotiana sylvestris]	--
Niben101Scf00063g06009	Niben101Scf00063g06009	0.334706	0.470607	0.385695	0.718486	1.24888	0.700981	0.555968	0.487745	0.749722	0.152296	0.307737	0.170392	0.589479	0.27126	normal	0.428922	-0.39492	normal	0.384756	0.382376	normal	0.000229	1.41131	up	0.015361	0.905655	normal	[TK]	Signal transduction mechanisms;; Transcription	Biological Process: phosphorelay signal transduction system (GO:0000160);; Cellular Component: intracellular (GO:0005622);;	K12127|0|sot:102593655|K12127 pseudo-response regulator 1 | (RefSeq) two-component response regulator-like APRR1	Circadian rhythm - plant (ko04712)	[K]	Transcription	Response regulator receiver domain	Two-component response regulator-like APRR1 OS=Arabidopsis thaliana OX=3702 GN=APRR1 PE=1 SV=1	K	Transcription	PREDICTED: two-component response regulator-like APRR1 [Nicotiana sylvestris]	biological process: cellular process (GO:0009987);; biological process: signaling (GO:0023052);; biological process: single-organism process (GO:0044699);; biological process: response to stimulus (GO:0050896);; biological process: biological regulation (GO:0065007);; cellular component: cell (GO:0005623);; cellular component: cell part (GO:0044464)
Niben101Scf00063g06042	Niben101Scf00063g06042	115.796	122.219	115.207	95.4645	76.6994	76.2982	95.8903	98.8053	93.7573	130.242	121.809	129.214	5.69e-06	-0.52606	normal	0.315468	0.266598	normal	0.483219	-0.17808	normal	4.08e-08	-1.01538	down	3.71e-08	-0.72685	normal	[G]	Carbohydrate transport and metabolism	Molecular Function: ribulose-phosphate 3-epimerase activity (GO:0004750);; Cellular Component: cytosol (GO:0005829);; Biological Process: pentose-phosphate shunt, non-oxidative branch (GO:0009052);; Cellular Component: chloroplast thylakoid membrane (GO:0009535);; Biological Process: reductive pentose-phosphate cycle (GO:0019253);; Biological Process: pentose catabolic process (GO:0019323);; Biol…	K01783|8.40858e-168|sot:102594969|K01783 ribulose-phosphate 3-epimerase [EC:5.1.3.1] | (RefSeq) PPE, RPE; ribulose-phosphate 3-epimerase, chloroplastic-like	Pentose phosphate pathway (ko00030);; Pentose and glucuronate interconversions (ko00040);; Carbon fixation in photosynthetic organisms (ko00710);; Carbon metabolism (ko01200);; Biosynthesis of amino acids (ko01230)	[G]	Carbohydrate transport and metabolism	Ribulose-phosphate 3 epimerase family	Ribulose-phosphate 3-epimerase, chloroplastic (Fragment) OS=Solanum tuberosum OX=4113 PE=1 SV=1	G	Carbohydrate transport and metabolism	PREDICTED: ribulose-phosphate 3-epimerase, chloroplastic [Nicotiana attenuata]	molecular function: catalytic activity (GO:0003824);; cellular component: cell (GO:0005623);; cellular component: cell part (GO:0044464);; biological process: metabolic process (GO:0008152);; biological process: cellular process (GO:0009987);; biological process: single-organism process (GO:0044699);; cellular component: membrane (GO:0016020);; cellular component: organelle (GO:0043226);; cellula…
Niben101Scf00063g08002	Niben101Scf00063g08002	2.10334	3.81521	2.83077	1.88325	9.20903	4.1508	1.25543	1.3105	2.58062	1.34229	1.44127	0.944085	0.03243	-0.77899	normal	0.040028	-0.9952	normal	0.015677	0.711152	normal	0.003218	1.288	up	0.862336	0.101697	normal	[O]	Posttranslational modification, protein turnover, chaperones	Biological Process: sulfate assimilation (GO:0000103);; Biological Process: protein folding (GO:0006457);; Biological Process: glycerol ether metabolic process (GO:0006662);; Cellular Component: chloroplast (GO:0009507);; Molecular Function: protein disulfide oxidoreductase activity (GO:0015035);; Molecular Function: oxidoreductase activity, acting on a sulfur group of donors, disulfide as accept…	--	--	[O]	Posttranslational modification, protein turnover, chaperones	Thioredoxin	Thioredoxin-like 1-2, chloroplastic OS=Arabidopsis thaliana OX=3702 GN=At5g61440 PE=2 SV=1	O	Posttranslational modification, protein turnover, chaperones	PREDICTED: thioredoxin-like 1-2, chloroplastic [Nicotiana attenuata]	biological process: metabolic process (GO:0008152);; biological process: cellular process (GO:0009987);; biological process: single-organism process (GO:0044699);; cellular component: cell (GO:0005623);; cellular component: organelle (GO:0043226);; cellular component: cell part (GO:0044464);; molecular function: catalytic activity (GO:0003824);; biological process: response to stimulus (GO:005089…
Niben101Scf00063g10001	Niben101Scf00063g10001	1.04931	1.1232	0.802417	2.48182	2.5282	2.51901	0.65568	0.980699	1.71446	0.362337	0.311397	0.535546	0.951002	-0.04819	normal	0.050722	-0.84804	normal	--	--	--	1.52e-07	1.89511	up	--	--	--	--	--	Cellular Component: extracellular region (GO:0005576);; Cellular Component: cell wall (GO:0005618);; Biological Process: plant-type cell wall organization (GO:0009664);; Cellular Component: membrane (GO:0016020);;	--	--	--	--	Pollen allergen;; Lytic transglycolase	Expansin-A15 OS=Arabidopsis thaliana OX=3702 GN=EXPA15 PE=2 SV=2	G	Carbohydrate transport and metabolism	PREDICTED: expansin-A15-like [Nicotiana sylvestris]	cellular component: extracellular region (GO:0005576);; cellular component: cell (GO:0005623);; cellular component: cell part (GO:0044464);; biological process: cellular process (GO:0009987);; biological process: cellular component organization or biogenesis (GO:0071840);; cellular component: membrane (GO:0016020)
Niben101Scf00063g10004	Niben101Scf00063g10004	853.77	929.09	905.479	602.307	437.505	400.366	651.494	555.619	627.234	990.697	748.992	926.058	1.31e-09	-0.77453	normal	0.221262	0.379423	normal	0.906418	-0.0663	normal	1.28e-07	-1.25466	down	1.56e-06	-0.84788	normal	--	--	Cellular Component: photosystem I (GO:0009522);; Cellular Component: chloroplast thylakoid membrane (GO:0009535);; Biological Process: photosynthesis, light harvesting (GO:0009765);; Cellular Component: integral component of membrane (GO:0016021);; Molecular Function: chlorophyll binding (GO:0016168);; Biological Process: protein-chromophore linkage (GO:0018298);; Molecular Function: metal ion bi…	K08910|4.78454e-126|sly:101268669|K08910 light-harvesting complex I chlorophyll a/b binding protein 4 | (RefSeq) CAB11; chlorophyll a-b binding protein CAB11	Photosynthesis - antenna proteins (ko00196)	--	--	Chlorophyll A-B binding protein	Chlorophyll a-b binding protein P4, chloroplastic OS=Pisum sativum OX=3888 GN=lhcA-P4 PE=1 SV=1	S	Function unknown	PREDICTED: chlorophyll a-b binding protein P4, chloroplastic [Nicotiana attenuata]	cellular component: cell (GO:0005623);; cellular component: membrane (GO:0016020);; cellular component: macromolecular complex (GO:0032991);; cellular component: membrane part (GO:0044425);; cellular component: cell part (GO:0044464);; cellular component: organelle (GO:0043226);; cellular component: organelle part (GO:0044422);; biological process: metabolic process (GO:0008152);; biological proc…
Niben101Scf00063g10008	Niben101Scf00063g10008	1156.54	1334.86	1249.09	751.937	605.498	565.434	871.238	786.725	840.766	1338.77	984.331	1203.51	1.76e-10	-0.80432	normal	0.087001	0.418555	normal	0.996109	-0.00322	normal	1.03e-08	-1.25578	down	5.97e-06	-0.80796	normal	--	--	Biological Process: response to light stimulus (GO:0009416);; Cellular Component: photosystem I (GO:0009522);; Cellular Component: chloroplast thylakoid membrane (GO:0009535);; Biological Process: photosynthesis, light harvesting in photosystem I (GO:0009768);; Cellular Component: chloroplast envelope (GO:0009941);; Cellular Component: plastoglobule (GO:0010287);; Cellular Component: integral com…	K08910|6.07923e-176|spen:107014513|K08910 light-harvesting complex I chlorophyll a/b binding protein 4 | (RefSeq) chlorophyll a-b binding protein 4, chloroplastic	Photosynthesis - antenna proteins (ko00196)	--	--	Chlorophyll A-B binding protein	Chlorophyll a-b binding protein P4, chloroplastic OS=Pisum sativum OX=3888 GN=lhcA-P4 PE=1 SV=1	S	Function unknown	PREDICTED: chlorophyll a-b binding protein P4, chloroplastic [Nicotiana attenuata]	biological process: response to stimulus (GO:0050896);; cellular component: cell (GO:0005623);; cellular component: membrane (GO:0016020);; cellular component: macromolecular complex (GO:0032991);; cellular component: membrane part (GO:0044425);; cellular component: cell part (GO:0044464);; cellular component: organelle (GO:0043226);; cellular component: organelle part (GO:0044422);; biological p…
Niben101Scf00063g13014	Niben101Scf00063g13014	609.912	713.174	701.62	583.36	450.698	404.325	473.442	502.743	533.277	829.142	662.435	767.5	3.77e-06	-0.64929	normal	0.753662	0.123089	normal	0.495311	-0.21411	normal	3.37e-06	-1.03683	down	2.13e-08	-0.89391	normal	[C]	Energy production and conversion	Biological Process: tRNA processing (GO:0008033);; Cellular Component: chloroplast (GO:0009507);; Biological Process: vitamin E biosynthetic process (GO:0010189);; Biological Process: photosynthesis (GO:0015979);; Biological Process: chlorophyll biosynthetic process (GO:0015995);; Molecular Function: oxidoreductase activity, acting on the CH-CH group of donors, NAD or NADP as acceptor (GO:0016628…	K10960|0|spen:107014180|K10960 geranylgeranyl diphosphate/geranylgeranyl-bacteriochlorophyllide a reductase [EC:1.3.1.83 1.3.1.111] | (RefSeq) geranylgeranyl diphosphate reductase, chloroplastic	Porphyrin and chlorophyll metabolism (ko00860);; Terpenoid backbone biosynthesis (ko00900)	--	--	FAD binding domain;; Pyridine nucleotide-disulphide oxidoreductase;; Lycopene cyclase protein;; Glucose inhibited division protein A	Geranylgeranyl diphosphate reductase, chloroplastic OS=Nicotiana tabacum OX=4097 GN=CHLP PE=2 SV=1	C	Energy production and conversion	geranylgeranyl reductase [Nicotiana benthamiana]	biological process: metabolic process (GO:0008152);; biological process: cellular process (GO:0009987);; cellular component: cell (GO:0005623);; cellular component: organelle (GO:0043226);; cellular component: cell part (GO:0044464);; biological process: single-organism process (GO:0044699);; molecular function: catalytic activity (GO:0003824);; molecular function: binding (GO:0005488)
Niben101Scf00069g02007	Niben101Scf00069g02007	2.99943	2.51342	3.02148	8.74305	10.5648	6.04415	2.70307	3.13395	4.5066	2.41356	2.79765	2.45764	0.967729	0.024128	normal	0.00053	-1.06394	down	0.942723	0.058539	normal	1.58e-06	1.21639	up	0.854957	0.081177	normal	--	--	--	--	--	[O]	Posttranslational modification, protein turnover, chaperones	CS domain	Uncharacterized protein OsI_027940 OS=Oryza sativa subsp. indica OX=39946 GN=OsI_027940 PE=1 SV=2	S	Function unknown	PREDICTED: uncharacterized protein OsI_027940 [Nicotiana sylvestris]	--
Niben101Scf00069g07004	Niben101Scf00069g07004	0.777343	0.341491	0.434857	0.402894	1.10985	2.39032	2.93047	4.4375	1.50408	0.048639	0.238987	0.221701	0.000142	1.41658	up	0.179108	0.761551	normal	--	--	--	--	--	--	2.06e-09	2.24097	up	--	--	Cellular Component: integral component of membrane (GO:0016021);;	--	--	--	--	--	Uncharacterized protein At5g65660 OS=Arabidopsis thaliana OX=3702 GN=At5g65660 PE=2 SV=1	S	Function unknown	PREDICTED: uncharacterized protein At5g65660-like [Nicotiana attenuata]	cellular component: membrane (GO:0016020);; cellular component: membrane part (GO:0044425)
Niben101Scf00069g10002	Niben101Scf00069g10002	2.34517	2.49261	1.902	2.78778	4.35192	3.63794	5.44456	5.5244	6.70054	1.30949	1.16092	1.82581	3.87e-05	1.01024	up	0.014222	0.717676	normal	0.513005	0.316738	normal	0.026309	0.78658	normal	3.11e-08	1.46509	up	--	--	--	--	--	--	--	PB1 domain	--	--	--	PREDICTED: uncharacterized protein LOC109211268 [Nicotiana attenuata]	--
Niben101Scf00069g12017	Niben101Scf00069g12017	106.312	94.6032	99.0868	56.8256	39.7186	48.0755	85.6831	68.4641	63.8704	115.205	99.2711	117.02	4.54e-05	-0.67218	normal	0.025366	0.60604	normal	0.467586	-0.20661	normal	8.39e-14	-1.56125	down	2.49e-07	-0.90453	normal	[E]	Amino acid transport and metabolism	Molecular Function: glycine hydroxymethyltransferase activity (GO:0004372);; Cellular Component: nucleus (GO:0005634);; Cellular Component: mitochondrion (GO:0005739);; Cellular Component: plasma membrane (GO:0005886);; Biological Process: glycine metabolic process (GO:0006544);; Biological Process: L-serine metabolic process (GO:0006563);; Molecular Function: methyltransferase activity (GO:00081…	K00600|0|sot:102591486|K00600 glycine hydroxymethyltransferase [EC:2.1.2.1] | (RefSeq) SHMT; serine hydroxymethyltransferase, mitochondrial-like	Glycine, serine and threonine metabolism (ko00260);; Cyanoamino acid metabolism (ko00460);; Glyoxylate and dicarboxylate metabolism (ko00630);; One carbon pool by folate (ko00670);; Carbon metabolism (ko01200);; Biosynthesis of amino acids (ko01230)	[E]	Amino acid transport and metabolism	Serine hydroxymethyltransferase	Serine hydroxymethyltransferase, mitochondrial OS=Solanum tuberosum OX=4113 PE=2 SV=1	E	Amino acid transport and metabolism	PREDICTED: serine hydroxymethyltransferase, mitochondrial-like [Nicotiana tabacum]	molecular function: catalytic activity (GO:0003824);; cellular component: cell (GO:0005623);; cellular component: organelle (GO:0043226);; cellular component: cell part (GO:0044464);; cellular component: membrane (GO:0016020);; biological process: metabolic process (GO:0008152);; biological process: cellular process (GO:0009987);; biological process: single-organism process (GO:0044699);; molecul…
Niben101Scf00069g15020	Niben101Scf00069g15020	13.684	11.3606	12.2638	12.2582	14.7368	11.5145	38.1014	34.9721	34.4331	11.2497	10.2227	9.85338	2.28e-13	1.205	up	3.05e-17	1.47654	up	0.809429	0.137843	normal	0.657995	-0.13557	normal	1.27e-15	1.36072	up	[T]	Signal transduction mechanisms	Molecular Function: calcium ion binding (GO:0005509);;	K13448|5.09208e-93|spen:107011246|K13448 calcium-binding protein CML | (RefSeq) calcium-binding protein CML24-like	Plant-pathogen interaction (ko04626)	[T]	Signal transduction mechanisms	EF hand;; EF-hand domain pair;; EF-hand domain;; EF hand;; EF-hand domain pair;; EF-hand domain;; Cytoskeletal-regulatory complex EF hand;; Secreted protein acidic and rich in cysteine Ca binding region	Probable calcium-binding protein CML23 OS=Arabidopsis thaliana OX=3702 GN=CML23 PE=2 SV=1	DTZ	Cell cycle control, cell division, chromosome partitioning;; Signal transduction mechanisms;; Cytoskeleton	PREDICTED: calcium-binding protein CML24-like [Nicotiana attenuata]	molecular function: binding (GO:0005488)
Niben101Scf00072g05004	Niben101Scf00072g05004	1.34591	1.24079	1.25296	1.11255	0.485866	0.812071	0.722906	0.43931	1.08464	1.28497	1.70627	1.14857	0.04143	-0.76625	normal	0.967858	-0.03783	normal	0.866196	-0.1249	normal	0.008903	-1.02463	down	0.005524	-0.96728	normal	[QV]	Secondary metabolites biosynthesis, transport and catabolism;; Defense mechanisms	Molecular Function: iron ion binding (GO:0005506);; Cellular Component: integral component of membrane (GO:0016021);; Molecular Function: oxidoreductase activity, acting on paired donors, with incorporation or reduction of molecular oxygen, NAD(P)H as one donor, and incorporation of one atom of oxygen (GO:0016709);; Molecular Function: heme binding (GO:0020037);; Biological Process: secondary met…	--	--	[Q]	Secondary metabolites biosynthesis, transport and catabolism	Cytochrome P450	5-epiaristolochene 1,3-dihydroxylase OS=Nicotiana tabacum OX=4097 GN=CYP71D20 PE=1 SV=2	Q	Secondary metabolites biosynthesis, transport and catabolism	PREDICTED: LOW QUALITY PROTEIN: 5-epiaristolochene 1,3-dihydroxylase-like [Nicotiana sylvestris]	molecular function: binding (GO:0005488);; cellular component: membrane (GO:0016020);; cellular component: membrane part (GO:0044425);; biological process: metabolic process (GO:0008152);; biological process: single-organism process (GO:0044699);; molecular function: catalytic activity (GO:0003824)
Niben101Scf00072g06001	Niben101Scf00072g06001	0.925649	0.739301	0.869758	0.757868	0.327586	0.498437	0.002193	0.332362	0.709858	0.789281	3.19228	0.722977	0.162028	-0.67433	normal	--	--	--	0.37999	-0.38129	normal	0.003366	-1.45305	down	0.214884	-0.55272	normal	[QV]	Secondary metabolites biosynthesis, transport and catabolism;; Defense mechanisms	Molecular Function: iron ion binding (GO:0005506);; Cellular Component: integral component of membrane (GO:0016021);; Molecular Function: oxidoreductase activity, acting on paired donors, with incorporation or reduction of molecular oxygen, NAD(P)H as one donor, and incorporation of one atom of oxygen (GO:0016709);; Molecular Function: heme binding (GO:0020037);; Biological Process: secondary met…	--	--	[Q]	Secondary metabolites biosynthesis, transport and catabolism	Cytochrome P450	5-epiaristolochene 1,3-dihydroxylase OS=Nicotiana tabacum OX=4097 GN=CYP71D20 PE=1 SV=2	Q	Secondary metabolites biosynthesis, transport and catabolism	PREDICTED: LOW QUALITY PROTEIN: 5-epiaristolochene 1,3-dihydroxylase-like [Nicotiana sylvestris]	molecular function: binding (GO:0005488);; cellular component: membrane (GO:0016020);; cellular component: membrane part (GO:0044425);; biological process: metabolic process (GO:0008152);; biological process: single-organism process (GO:0044699);; molecular function: catalytic activity (GO:0003824)
Niben101Scf00073g04002	Niben101Scf00073g04002	2.67172	1.59879	2.71725	3.20242	2.65542	2.62799	6.5126	4.53341	5.5628	1.67023	2.63849	1.66631	0.00103	0.870298	normal	0.000131	0.947569	normal	0.883676	0.111493	normal	0.815415	0.089578	normal	2.52e-06	1.04808	up	--	--	Molecular Function: transcription factor activity, sequence-specific DNA binding (GO:0003700);; Cellular Component: nucleus (GO:0005634);; Biological Process: regulation of transcription, DNA-templated (GO:0006355);; Molecular Function: sequence-specific DNA binding (GO:0043565);;	K09419|0|sot:102593932|K09419 heat shock transcription factor, other eukaryote | (RefSeq) heat stress transcription factor A-4a	--	[K]	Transcription	HSF-type DNA-binding	Heat stress transcription factor A-4a OS=Arabidopsis thaliana OX=3702 GN=HSFA4A PE=2 SV=1	K	Transcription	PREDICTED: heat stress transcription factor A-4c-like [Nicotiana attenuata]	biological process: biological regulation (GO:0065007);; molecular function: nucleic acid binding transcription factor activity (GO:0001071);; cellular component: cell (GO:0005623);; cellular component: organelle (GO:0043226);; cellular component: cell part (GO:0044464);; molecular function: binding (GO:0005488)
Niben101Scf00077g05015	Niben101Scf00077g05015	63.3023	59.1757	66.5724	59.6243	46.2286	43.0287	66.4938	76.3563	58.6236	80.5801	84.1787	80.1005	0.572752	-0.1481	normal	0.099585	0.465332	normal	0.006385	-0.41732	normal	1.04e-08	-1.10344	down	0.000101	-0.59947	normal	[QV]	Secondary metabolites biosynthesis, transport and catabolism;; Defense mechanisms	Molecular Function: iron ion binding (GO:0005506);; Biological Process: lignin biosynthetic process (GO:0009809);; Cellular Component: integral component of membrane (GO:0016021);; Molecular Function: heme binding (GO:0020037);; Molecular Function: 5-O-(4-coumaroyl)-D-quinate 3'-monooxygenase activity (GO:0047083);; Biological Process: oxidation-reduction process (GO:0055114);;	K09754|0|sot:102578747|K09754 coumaroylquinate(coumaroylshikimate) 3'-monooxygenase [EC:1.14.13.36] | (RefSeq) cytochrome P450 98A2-like	Phenylpropanoid biosynthesis (ko00940);; Flavonoid biosynthesis (ko00941);; Stilbenoid, diarylheptanoid and gingerol biosynthesis (ko00945)	[Q]	Secondary metabolites biosynthesis, transport and catabolism	Cytochrome P450	Cytochrome P450 98A2 OS=Glycine max OX=3847 GN=CYP98A2 PE=2 SV=1	Q	Secondary metabolites biosynthesis, transport and catabolism	PREDICTED: cytochrome P450 98A2-like [Nicotiana sylvestris]	molecular function: binding (GO:0005488);; biological process: metabolic process (GO:0008152);; biological process: cellular process (GO:0009987);; biological process: single-organism process (GO:0044699);; cellular component: membrane (GO:0016020);; cellular component: membrane part (GO:0044425);; molecular function: catalytic activity (GO:0003824)
Niben101Scf00080g01007	Niben101Scf00080g01007	3.31063	2.46303	1.52891	0.929027	3.21085	0.476063	0.823645	0.483488	1.63087	2.10604	2.27613	1.0768	0.011793	-1.00376	down	--	--	--	0.807329	0.172624	normal	0.415861	-0.50943	normal	0.055498	-0.83157	normal	--	--	Cellular Component: cytoplasm (GO:0005737);; Cellular Component: plasma membrane (GO:0005886);; Biological Process: cytokinin metabolic process (GO:0009690);;	--	--	--	--	--	--	S	Function unknown	PREDICTED: uncharacterized protein LOC109211543 [Nicotiana attenuata]	cellular component: cell (GO:0005623);; cellular component: cell part (GO:0044464);; cellular component: membrane (GO:0016020);; biological process: metabolic process (GO:0008152);; biological process: cellular process (GO:0009987);; biological process: biological regulation (GO:0065007)
Niben101Scf00080g05006	Niben101Scf00080g05006	14.1057	12.4192	31.2838	13.8269	26.1585	20.2892	96.6988	47.9399	63.377	10.4682	39.1831	13.6559	0.028025	0.935678	normal	1.39e-08	1.62319	up	0.966682	-0.03634	normal	0.367514	-0.41388	normal	0.076178	0.832598	normal	--	--	Molecular Function: transcription factor activity, sequence-specific DNA binding (GO:0003700);; Cellular Component: nucleus (GO:0005634);; Biological Process: regulation of transcription, DNA-templated (GO:0006355);; Molecular Function: sequence-specific DNA binding (GO:0043565);; Molecular Function: transcription regulatory region DNA binding (GO:0044212);; Molecular Function: metal ion binding …	--	--	[R]	General function prediction only	C2H2-type zinc finger	Zinc finger protein ZAT10 OS=Arabidopsis thaliana OX=3702 GN=ZAT10 PE=2 SV=1	S	Function unknown	zinc finger protein PIF1 [Nicotiana benthamiana]	biological process: biological regulation (GO:0065007);; molecular function: nucleic acid binding transcription factor activity (GO:0001071);; cellular component: cell (GO:0005623);; cellular component: organelle (GO:0043226);; cellular component: cell part (GO:0044464);; molecular function: binding (GO:0005488)
Niben101Scf00082g05001	Niben101Scf00082g05001	5.74158	5.17431	4.92456	8.09306	3.18334	3.69577	7.6479	22.0539	7.27251	9.12651	6.4808	11.2941	0.114895	0.678772	normal	0.089953	0.880242	normal	0.142399	-0.5171	normal	0.015846	-1.05513	down	0.906466	0.078416	normal	[O]	Posttranslational modification, protein turnover, chaperones	Cellular Component: cell (GO:0005623);; Molecular Function: electron carrier activity (GO:0009055);; Molecular Function: protein disulfide oxidoreductase activity (GO:0015035);; Cellular Component: integral component of membrane (GO:0016021);; Biological Process: cell redox homeostasis (GO:0045454);; Biological Process: oxidation-reduction process (GO:0055114);;	K03676|9.87535e-65|sot:102598582|K03676 glutaredoxin 3 | (RefSeq) monothiol glutaredoxin-S3	--	[O]	Posttranslational modification, protein turnover, chaperones	Glutaredoxin	Monothiol glutaredoxin-S3 OS=Arabidopsis thaliana OX=3702 GN=GRXS3 PE=3 SV=1	O	Posttranslational modification, protein turnover, chaperones	PREDICTED: monothiol glutaredoxin-S2 [Nicotiana tomentosiformis]	cellular component: cell (GO:0005623);; molecular function: electron carrier activity (GO:0009055);; biological process: metabolic process (GO:0008152);; biological process: single-organism process (GO:0044699);; molecular function: catalytic activity (GO:0003824);; cellular component: membrane (GO:0016020);; cellular component: membrane part (GO:0044425);; biological process: cellular process (G…
Niben101Scf00089g04004	Niben101Scf00089g04004	13.3094	16.5693	18.2732	11.3979	9.28915	12.265	10.7014	9.79733	8.59192	17.6579	12.4723	21.2492	3.73e-05	-0.89299	normal	0.824009	-0.10325	normal	0.834845	-0.13467	normal	0.000252	-1.01445	down	1.48e-05	-1.05847	down	--	--	--	--	--	--	--	Dof domain, zinc finger	Dof zinc finger protein DOF5.3 OS=Arabidopsis thaliana OX=3702 GN=DOF5.3 PE=2 SV=1	S	Function unknown	PREDICTED: dof zinc finger protein DOF2.1-like isoform X2 [Nicotiana tomentosiformis]	--
Niben101Scf00090g08011	Niben101Scf00090g08011	0.953293	0.973986	0.686574	0.964055	5.87403	0.943509	0.252018	0.508804	0.639796	0.324421	0.616909	0.272356	0.039403	-0.80901	normal	0.008185	-1.29058	down	0.187744	0.496206	normal	0.002108	1.59119	up	0.916008	-0.07547	normal	--	--	Cellular Component: nucleus (GO:0005634);; Cellular Component: cytosol (GO:0005829);; Cellular Component: plasma membrane (GO:0005886);;	--	--	[U]	Intracellular trafficking, secretion, and vesicular transport	VID27 cytoplasmic protein	Protein CYPRO4 OS=Cynara cardunculus OX=4265 GN=CYPRO4 PE=2 SV=1	U	Intracellular trafficking, secretion, and vesicular transport	PREDICTED: protein CYPRO4-like [Nicotiana sylvestris]	cellular component: cell (GO:0005623);; cellular component: organelle (GO:0043226);; cellular component: cell part (GO:0044464);; cellular component: membrane (GO:0016020)
Niben101Scf00090g13009	Niben101Scf00090g13009	0.368306	0.935935	0.840744	3.75589	3.39538	5.41535	4.19168	7.57739	6.409	0.385746	0.584724	0.548821	1.44e-09	1.96297	up	0.270858	0.499526	normal	--	--	--	5.9e-08	2.1429	up	7.87e-14	2.41027	up	--	--	Cellular Component: mitochondrion (GO:0005739);;	--	--	--	--	--	--	S	Function unknown	hypothetical protein NitaMp105 [Nicotiana tabacum]	cellular component: cell (GO:0005623);; cellular component: organelle (GO:0043226);; cellular component: cell part (GO:0044464)
Niben101Scf00091g01025	Niben101Scf00091g01025	4.60792	4.83362	3.09585	6.92217	10.0687	8.37716	4.42089	4.79808	5.16129	2.24303	3.98501	2.76718	0.931786	-0.03987	normal	0.001067	-0.6984	normal	0.467586	0.30084	normal	7.55e-06	1.01876	up	0.248032	0.3197	normal	[M]	Cell wall/membrane/envelope biogenesis	Molecular Function: protein serine/threonine kinase activity (GO:0004674);; Molecular Function: ATP binding (GO:0005524);; Biological Process: protein phosphorylation (GO:0006468);; Cellular Component: integral component of membrane (GO:0016021);;	K04733|0|sot:102584374|K04733 interleukin-1 receptor-associated kinase 4 [EC:2.7.11.1] | (RefSeq) probable receptor-like serine/threonine-protein kinase At4g34500	--	[T]	Signal transduction mechanisms	Protein kinase domain;; Protein tyrosine kinase	Probable receptor-like serine/threonine-protein kinase At4g34500 OS=Arabidopsis thaliana OX=3702 GN=At4g34500 PE=2 SV=1	T	Signal transduction mechanisms	PREDICTED: probable receptor-like serine/threonine-protein kinase At4g34500 [Nicotiana tomentosiformis]	biological process: metabolic process (GO:0008152);; biological process: cellular process (GO:0009987);; molecular function: catalytic activity (GO:0003824);; molecular function: binding (GO:0005488);; cellular component: membrane (GO:0016020);; cellular component: membrane part (GO:0044425)
Niben101Scf00096g03005	Niben101Scf00096g03005	14.9451	10.9583	12.7509	8.42981	6.37671	8.13251	19.9966	11.6034	13.4497	15.3717	14.7741	18.0078	0.972138	-0.02163	normal	0.009901	0.889139	normal	0.431504	-0.30581	normal	3.59e-08	-1.40804	down	0.215735	-0.39463	normal	--	--	--	--	--	--	--	--	--	S	Function unknown	PREDICTED: probable plastid-lipid-associated protein 13, chloroplastic [Nicotiana attenuata]	--
Niben101Scf00096g03007	Niben101Scf00096g03007	17.2431	13.0969	14.4563	9.72816	7.89518	10.2662	19.4926	13.4979	13.4206	17.1564	16.8129	18.5208	0.593335	-0.17877	normal	0.006247	0.736683	normal	0.317446	-0.27322	normal	4.45e-12	-1.30006	down	0.023821	-0.49021	normal	--	--	--	--	--	--	--	PAP_fibrillin	Probable plastid-lipid-associated protein 9, chloroplastic OS=Arabidopsis thaliana OX=3702 GN=PAP9 PE=1 SV=1	S	Function unknown	PREDICTED: probable plastid-lipid-associated protein 13, chloroplastic [Nicotiana attenuata]	--
Niben101Scf00103g04008	Niben101Scf00103g04008	0.361217	0.382717	0.36079	0.338995	0.093164	0.377794	0.71049	0.530428	0.22155	0.576139	0.656942	0.939201	0.890249	0.102901	normal	0.413785	0.525235	normal	0.07181	-0.59517	normal	0.001098	-1.47184	down	0.106157	-0.683	normal	[T]	Signal transduction mechanisms	Molecular Function: protein serine/threonine kinase activity (GO:0004674);; Molecular Function: ATP binding (GO:0005524);; Cellular Component: cytosol (GO:0005829);; Biological Process: protein phosphorylation (GO:0006468);; Biological Process: intracellular signal transduction (GO:0035556);;	K08867|0|sot:102590406|K08867 WNK lysine deficient protein kinase [EC:2.7.11.1] | (RefSeq) probable serine/threonine-protein kinase WNK5	--	[R]	General function prediction only	Protein kinase domain;; Protein tyrosine kinase	Probable serine/threonine-protein kinase WNK5 OS=Arabidopsis thaliana OX=3702 GN=WNK5 PE=1 SV=2	T	Signal transduction mechanisms	PREDICTED: probable serine/threonine-protein kinase WNK5 [Nicotiana sylvestris]	biological process: metabolic process (GO:0008152);; biological process: cellular process (GO:0009987);; molecular function: catalytic activity (GO:0003824);; molecular function: binding (GO:0005488);; cellular component: cell (GO:0005623);; cellular component: cell part (GO:0044464);; biological process: signaling (GO:0023052);; biological process: single-organism process (GO:0044699);; biologic…
Niben101Scf00104g02012	Niben101Scf00104g02012	308.594	327.233	339.723	244.025	161.811	186.494	165.681	198.411	191.559	321.188	309.699	322.683	5.21e-14	-1.02116	down	0.955482	-0.03017	normal	0.930429	-0.04342	normal	7.75e-07	-1.0649	down	9.74e-16	-1.08832	down	--	--	Cellular Component: chloroplast (GO:0009507);; Cellular Component: photosystem II (GO:0009523);; Biological Process: photosynthesis (GO:0015979);; Cellular Component: integral component of membrane (GO:0016021);;	K02721|5.43954e-37|sot:102581428|K02721 photosystem II PsbW protein | (RefSeq) photosystem II reaction center W protein, chloroplastic	Photosynthesis (ko00195)	--	--	Photosystem II reaction centre W protein (PsbW)	Photosystem II reaction center W protein, chloroplastic OS=Arabidopsis thaliana OX=3702 GN=PSBW PE=1 SV=2	S	Function unknown	PREDICTED: photosystem II reaction center W protein, chloroplastic-like [Nicotiana sylvestris]	cellular component: cell (GO:0005623);; cellular component: organelle (GO:0043226);; cellular component: cell part (GO:0044464);; cellular component: membrane (GO:0016020);; cellular component: macromolecular complex (GO:0032991);; cellular component: membrane part (GO:0044425);; biological process: metabolic process (GO:0008152);; biological process: cellular process (GO:0009987)
Niben101Scf00104g02013	Niben101Scf00104g02013	2.91518	3.22777	2.77365	2.49035	3.90491	2.07272	1.10741	1.54313	1.97071	1.77303	1.88072	2.45839	2.54e-05	-1.04775	down	0.092345	-0.667	normal	0.29661	0.358707	normal	0.973242	0.01676	normal	0.030013	-0.65507	normal	--	--	--	--	--	--	--	F-box domain;; F-box-like	F-box/LRR-repeat protein 17 OS=Arabidopsis thaliana OX=3702 GN=FBL17 PE=1 SV=1	S	Function unknown	PREDICTED: F-box/LRR-repeat protein 17-like [Nicotiana attenuata]	--
Niben101Scf00107g02001	Niben101Scf00107g02001	3.66583	3.02909	8.60886	2.43263	3.43075	2.80603	18.7336	8.5861	9.862	2.65208	3.69608	3.65423	0.295523	0.542153	normal	1.38e-10	1.86386	up	0.748963	0.197083	normal	0.007873	-0.61843	normal	2.56e-07	1.36164	up	--	--	Molecular Function: calcium ion binding (GO:0005509);; Molecular Function: calcium-dependent phospholipid binding (GO:0005544);; Cellular Component: plasma membrane (GO:0005886);;	--	--	[R]	General function prediction only	--	--	S	Function unknown	PREDICTED: extensin-like isoform X2 [Nicotiana sylvestris]	molecular function: binding (GO:0005488);; cellular component: cell (GO:0005623);; cellular component: membrane (GO:0016020);; cellular component: cell part (GO:0044464)
Niben101Scf00107g03008	Niben101Scf00107g03008	0.432323	1.1073	0.380003	33.2126	6.59743	33.1994	7.36994	93.8798	10.8805	0.538696	1.39718	0.556698	0.020639	0.848452	normal	0.81515	0.17729	normal	--	--	--	1.31e-06	2.60373	up	0.010662	1.02483	up	[S]	Function unknown	Cellular Component: extracellular region (GO:0005576);; Cellular Component: vacuole (GO:0005773);; Biological Process: defense response (GO:0006952);; Biological Process: response to biotic stimulus (GO:0009607);;	K13449|3.82776e-89|sot:102595771|K13449 pathogenesis-related protein 1 | (RefSeq) pathogenesis-related protein 1C-like	Plant hormone signal transduction (ko04075);; Plant-pathogen interaction (ko04626)	[S]	Function unknown	Cysteine-rich secretory protein family	Pathogenesis-related protein 1B OS=Nicotiana tabacum OX=4097 PE=2 SV=1	S	Function unknown	PREDICTED: pathogenesis-related protein 1B [Nicotiana tabacum]	cellular component: extracellular region (GO:0005576);; cellular component: cell (GO:0005623);; cellular component: organelle (GO:0043226);; cellular component: cell part (GO:0044464);; biological process: response to stimulus (GO:0050896)
Niben101Scf00109g02027	Niben101Scf00109g02027	0.11505	0.033228	0.486521	0.25018	0.388262	0.163759	3.31191	1.00065	1.05678	0.809853	0.447197	0.127464	0.002782	1.21083	up	5.34e-05	1.73977	up	--	--	--	--	--	--	0.036589	0.947043	normal	--	--	Biological Process: transcription, DNA-templated (GO:0006351);;	--	--	--	--	No apical meristem (NAM) protein	NAC domain-containing protein 83 OS=Arabidopsis thaliana OX=3702 GN=NAC083 PE=1 SV=1	S	Function unknown	PREDICTED: NAC domain-containing protein 68-like isoform X2 [Nicotiana sylvestris]	biological process: metabolic process (GO:0008152);; biological process: cellular process (GO:0009987)
Niben101Scf00109g03008	Niben101Scf00109g03008	12.901	10.5766	32.5982	18.8326	8.43431	7.34007	39.5036	21.5848	18.2569	16.2763	21.4966	23.123	0.876532	0.120503	normal	0.174141	0.764417	normal	0.950641	-0.05707	normal	0.001781	-1.09022	down	0.934774	0.041288	normal	[I]	Lipid transport and metabolism	Molecular Function: magnesium ion binding (GO:0000287);; Molecular Function: glycerophosphodiester phosphodiesterase activity (GO:0008889);; Cellular Component: plastid (GO:0009536);; Biological Process: cellular phosphate ion homeostasis (GO:0030643);; Biological Process: glycerophospholipid catabolic process (GO:0046475);;	--	--	[R]	General function prediction only	Glycerophosphoryl diester phosphodiesterase family	Glycerophosphodiester phosphodiesterase GDPD2 OS=Arabidopsis thaliana OX=3702 GN=GDPD2 PE=2 SV=1	C	Energy production and conversion	PREDICTED: glycerophosphodiester phosphodiesterase GDPD1, chloroplastic-like [Nicotiana attenuata]	molecular function: binding (GO:0005488);; molecular function: catalytic activity (GO:0003824);; cellular component: cell (GO:0005623);; cellular component: organelle (GO:0043226);; cellular component: cell part (GO:0044464);; biological process: cellular process (GO:0009987);; biological process: single-organism process (GO:0044699);; biological process: biological regulation (GO:0065007);; biol…
Niben101Scf00109g05016	Niben101Scf00109g05016	1.01502	1.20205	1.20466	2.76763	2.35226	2.69913	1.85482	1.50975	2.7262	0.798097	1.04552	0.641342	0.139619	0.493259	normal	0.556615	-0.26158	normal	0.581745	0.268392	normal	4.71e-06	1.1624	up	0.004734	0.829875	normal	--	--	Cellular Component: nuclear chromosome (GO:0000228);; Biological Process: double-strand break repair (GO:0006302);;	K06670|0|sot:102599094|K06670 cohesin complex subunit SCC1 | (RefSeq) sister chromatid cohesion 1 protein 2	--	[D]	Cell cycle control, cell division, chromosome partitioning	Conserved region of Rad21 / Rec8 like protein;; N terminus of Rad21 / Rec8 like protein	Sister chromatid cohesion 1 protein 2 OS=Arabidopsis thaliana OX=3702 GN=SYN2 PE=2 SV=2	S	Function unknown	PREDICTED: sister chromatid cohesion 1 protein 2 isoform X2 [Nicotiana sylvestris]	cellular component: cell (GO:0005623);; cellular component: organelle (GO:0043226);; cellular component: organelle part (GO:0044422);; cellular component: cell part (GO:0044464);; biological process: metabolic process (GO:0008152);; biological process: cellular process (GO:0009987);; biological process: response to stimulus (GO:0050896)
Niben101Scf00109g05018	Niben101Scf00109g05018	0.838602	1.0115	0.56615	1.99191	3.12635	1.49657	1.10626	1.12729	1.44841	0.480032	0.546269	0.531977	0.457645	0.308044	normal	0.093553	-0.64911	normal	0.489379	0.32557	normal	2e-06	1.48671	up	0.005875	0.784928	normal	[T]	Signal transduction mechanisms	--	--	--	[R]	General function prediction only	Ankyrin repeats (3 copies);; Ankyrin repeat;; Ankyrin repeat;; Ankyrin repeats (many copies);; Ankyrin repeats (many copies)	Potassium channel AKT1 OS=Oryza sativa subsp. indica OX=39946 GN=AKT1 PE=2 SV=1	S	Function unknown	PREDICTED: ankyrin-3 isoform X1 [Nicotiana attenuata]	--
Niben101Scf00109g07005	Niben101Scf00109g07005	3.14784	0.037467	2.54033	0.893055	4.43682	0.474934	36.0727	11.7178	12.1406	0.678	1.30063	1.34375	0.163179	0.551815	normal	0.028105	1.08203	up	--	--	--	--	--	--	1.42e-15	2.71946	up	[T]	Signal transduction mechanisms	Molecular Function: calcium ion binding (GO:0005509);;	K13448|8.7506e-90|sot:102601867|K13448 calcium-binding protein CML | (RefSeq) putative calcium-binding protein CML19	Plant-pathogen interaction (ko04626)	[T]	Signal transduction mechanisms	EF hand;; EF-hand domain;; EF-hand domain pair;; EF-hand domain pair;; EF hand;; Cytoskeletal-regulatory complex EF hand	Putative calcium-binding protein CML19 OS=Oryza sativa subsp. japonica OX=39947 GN=CML19 PE=3 SV=1	DTZ	Cell cycle control, cell division, chromosome partitioning;; Signal transduction mechanisms;; Cytoskeleton	PREDICTED: putative calcium-binding protein CML19 [Nicotiana attenuata]	molecular function: binding (GO:0005488)
Niben101Scf00110g00006	Niben101Scf00110g00006	2.31168	2.15994	4.44298	2.05865	1.62951	1.64544	5.49765	2.24843	3.74492	2.29205	5.70978	2.50986	0.907805	0.078472	normal	0.008334	0.972652	normal	0.906367	-0.09594	normal	0.000156	-1.24164	down	0.779747	-0.14859	normal	--	--	Cellular Component: nucleus (GO:0005634);; Cellular Component: cytoplasm (GO:0005737);;	K08332|0|sot:102600239|K08332 vacuolar protein 8 | (RefSeq) U-box domain-containing protein 44-like	Regulation of autophagy (ko04140)	[S]	Function unknown	Armadillo/beta-catenin-like repeat;; Kinesin-associated protein (KAP)	U-box domain-containing protein 44 OS=Arabidopsis thaliana OX=3702 GN=PUB44 PE=1 SV=1	S	Function unknown	PREDICTED: U-box domain-containing protein 44-like [Nicotiana sylvestris]	cellular component: cell (GO:0005623);; cellular component: organelle (GO:0043226);; cellular component: cell part (GO:0044464)
Niben101Scf00110g03002	Niben101Scf00110g03002	78.975	74.8148	73.9045	41.7209	34.903	39.872	71.0509	65.7528	62.387	83.5363	70.9253	87.689	0.001291	-0.42661	normal	4.64e-06	0.805415	normal	0.651973	-0.1569	normal	1.07e-14	-1.44387	down	0.000416	-0.60394	normal	--	--	--	--	--	--	--	--	Protein LNK2 OS=Arabidopsis thaliana OX=3702 GN=LNK2 PE=1 SV=1	S	Function unknown	PREDICTED: protein LNK2 isoform X3 [Nicotiana attenuata]	--
Niben101Scf00110g05012	Niben101Scf00110g05012	0.459226	0.711868	0.259647	0.681304	2.06734	0.57933	0.118728	0.281365	0.431403	0.406445	0.338053	0.121477	0.252378	-0.57512	normal	0.023476	-1.12874	down	--	--	--	0.035831	1.1084	up	--	--	--	--	--	Molecular Function: zinc ion binding (GO:0008270);; Cellular Component: integral component of membrane (GO:0016021);; Molecular Function: protein-cysteine S-palmitoyltransferase activity (GO:0019706);;	K20027|0|spen:107013279|K20027 palmitoyltransferase ZDHHC1/11 [EC:2.3.1.225] | (RefSeq) protein S-acyltransferase 18	--	[R]	General function prediction only	DHHC palmitoyltransferase	Protein S-acyltransferase 18 OS=Arabidopsis thaliana OX=3702 GN=PAT18 PE=2 SV=2	S	Function unknown	PREDICTED: protein S-acyltransferase 18 isoform X1 [Nicotiana attenuata]	molecular function: binding (GO:0005488);; cellular component: membrane (GO:0016020);; cellular component: membrane part (GO:0044425);; molecular function: catalytic activity (GO:0003824)
Niben101Scf00113g06004	Niben101Scf00113g06004	0.830234	0.663585	0.256825	1.03405	3.05341	1.75203	0.991512	0.395478	1.01527	0.122713	0.190758	0.304425	0.864001	0.128857	normal	0.106707	-0.81895	normal	--	--	--	1.29e-06	2.14436	up	--	--	--	--	--	Biological Process: anthocyanin-containing compound biosynthetic process (GO:0009718);; Molecular Function: anthocyanidin 3-O-glucosyltransferase activity (GO:0047213);;	--	--	[GC]	Carbohydrate transport and metabolism;; Energy production and conversion	UDP-glucoronosyl and UDP-glucosyl transferase	Anthocyanidin 3-O-glucosyltransferase OS=Petunia hybrida OX=4102 GN=RT PE=2 SV=1	S	Function unknown	PREDICTED: anthocyanidin 3-O-glucosyltransferase [Nicotiana attenuata]	biological process: metabolic process (GO:0008152);; biological process: single-organism process (GO:0044699);; molecular function: catalytic activity (GO:0003824)
Niben101Scf00116g03003	Niben101Scf00116g03003	6.52447	7.8912	7.83352	3.78397	2.79697	2.74254	5.3481	3.66994	4.9706	6.6329	7.39645	7.79112	8.95e-05	-0.84004	normal	0.083439	0.579831	normal	0.950951	-0.04228	normal	1.12e-12	-1.57482	down	2.1e-06	-0.92085	normal	--	--	Molecular Function: protein serine/threonine kinase activity (GO:0004674);; Biological Process: protein autophosphorylation (GO:0046777);;	--	--	--	--	PB1 domain	--	S	Function unknown	PREDICTED: uncharacterized protein LOC104228647 [Nicotiana sylvestris]	biological process: metabolic process (GO:0008152);; biological process: cellular process (GO:0009987);; molecular function: catalytic activity (GO:0003824)
Niben101Scf00119g01002	Niben101Scf00119g01002	2.35401	3.00138	1.38309	3.89945	45.2368	6.5363	1.78788	2.26138	3.47014	0.98899	1.30046	0.898624	0.932327	-0.0592	normal	0.094649	-0.873	normal	0.133521	0.536022	normal	0.003583	1.70542	up	0.043863	0.728291	normal	--	--	Cellular Component: extracellular region (GO:0005576);; Cellular Component: plant-type cell wall (GO:0009505);; Cellular Component: plasmodesma (GO:0009506);;	--	--	--	--	Thaumatin family	Osmotin-like protein OS=Solanum lycopersicum OX=4081 PE=1 SV=1	S	Function unknown	PREDICTED: osmotin-like protein [Nicotiana sylvestris]	cellular component: extracellular region (GO:0005576);; cellular component: cell (GO:0005623);; cellular component: cell part (GO:0044464);; cellular component: cell junction (GO:0030054)
Niben101Scf00119g02012	Niben101Scf00119g02012	36.12	36.3345	39.3971	30.7977	24.2616	24.7638	33.4617	36.6585	30.4644	42.0055	39.8504	45.4468	0.023819	-0.38505	normal	0.15418	0.376038	normal	0.325875	-0.24258	normal	2.73e-08	-1.06665	down	2.72e-05	-0.65897	normal	[M]	Cell wall/membrane/envelope biogenesis	Cellular Component: integral component of membrane (GO:0016021);; Biological Process: protein insertion into membrane (GO:0051205);;	K03217|0|sot:102595772|K03217 YidC/Oxa1 family membrane protein insertase | (RefSeq) inner membrane protein PPF-1, chloroplastic	Protein export (ko03060)	[OU]	Posttranslational modification, protein turnover, chaperones;; Intracellular trafficking, secretion, and vesicular transport	60Kd inner membrane protein	Inner membrane protein PPF-1, chloroplastic OS=Pisum sativum OX=3888 GN=PPF-1 PE=2 SV=2	U	Intracellular trafficking, secretion, and vesicular transport	PREDICTED: inner membrane protein PPF-1, chloroplastic [Nicotiana attenuata]	cellular component: membrane (GO:0016020);; cellular component: membrane part (GO:0044425);; biological process: localization (GO:0051179)
Niben101Scf00121g00025	Niben101Scf00121g00025	6.9192	8.19469	7.21093	5.67922	4.1192	3.31212	5.13475	6.46478	5.4568	8.34849	7.61617	8.28323	0.0035	-0.59375	normal	0.328775	0.38886	normal	0.675102	-0.17206	normal	2.07e-06	-1.23404	down	2.07e-05	-0.80495	normal	--	--	Cellular Component: integral component of membrane (GO:0016021);;	--	--	--	--	--	Uncharacterized GPI-anchored protein At4g28100 OS=Arabidopsis thaliana OX=3702 GN=At4g28100 PE=1 SV=1	--	--	PREDICTED: uncharacterized GPI-anchored protein At4g28100-like [Nicotiana attenuata]	cellular component: membrane (GO:0016020);; cellular component: membrane part (GO:0044425)
Niben101Scf00123g04002	Niben101Scf00123g04002	19.8093	33.4963	8.46819	66.8259	101.369	79.3667	10.1957	17.5063	28.4573	5.17364	5.51924	4.84319	0.798773	-0.1865	normal	7.33e-09	-1.74706	down	0.041315	0.614858	normal	9.18e-101	3.45746	up	3.55e-06	1.29757	up	--	--	--	--	--	--	--	Protein of unknown function (DUF642)	--	S	Function unknown	PREDICTED: uncharacterized protein LOC104210873 [Nicotiana sylvestris]	--
Niben101Scf00123g06029	Niben101Scf00123g06029	2.00928	2.16803	1.75743	4.28281	5.56549	2.86729	1.5513	3.07882	2.42309	1.25166	1.27439	1.53978	0.995631	0.003666	normal	0.137432	-0.63638	normal	0.497935	0.308124	normal	0.000538	1.09649	up	0.343347	0.376568	normal	[R]	General function prediction only	Biological Process: protein depalmitoylation (GO:0002084);; Cellular Component: cytoplasm (GO:0005737);; Molecular Function: palmitoyl-(protein) hydrolase activity (GO:0008474);; Molecular Function: carboxylic ester hydrolase activity (GO:0052689);;	K06130|1.38779e-158|spen:107021518|K06130 lysophospholipase II [EC:3.1.1.5] | (RefSeq) acyl-protein thioesterase 2-like	Glycerophospholipid metabolism (ko00564)	[I]	Lipid transport and metabolism	Phospholipase/Carboxylesterase;; Serine hydrolase (FSH1)	Probable carboxylesterase Os04g0669500 OS=Oryza sativa subsp. japonica OX=39947 GN=Os04g0669500 PE=3 SV=1	S	Function unknown	PREDICTED: acyl-protein thioesterase 2-like isoform X1 [Nicotiana attenuata]	biological process: metabolic process (GO:0008152);; biological process: cellular process (GO:0009987);; cellular component: cell (GO:0005623);; cellular component: cell part (GO:0044464);; molecular function: catalytic activity (GO:0003824)
Niben101Scf00124g00012	Niben101Scf00124g00012	43.2911	38.1466	50.9541	33.9908	25.5893	25.2202	35.8528	38.026	30.678	48.556	47.2739	51.1307	0.006696	-0.5528	normal	0.280842	0.339534	normal	0.552868	-0.1999	normal	8.21e-09	-1.17437	down	3.03e-07	-0.80181	normal	--	--	Cellular Component: chloroplast thylakoid membrane (GO:0009535);; Cellular Component: integral component of membrane (GO:0016021);;	--	--	--	--	--	--	S	Function unknown	PREDICTED: uncharacterized protein LOC109228108 [Nicotiana attenuata]	cellular component: cell (GO:0005623);; cellular component: membrane (GO:0016020);; cellular component: organelle (GO:0043226);; cellular component: organelle part (GO:0044422);; cellular component: cell part (GO:0044464);; cellular component: membrane part (GO:0044425)
Niben101Scf00124g00014	Niben101Scf00124g00014	2.6757	2.7285	4.04352	2.47608	2.21883	3.16291	7.78684	4.7358	5.71671	2.87672	3.98962	3.72899	0.05389	0.596215	normal	4.92e-05	1.13965	up	0.766416	-0.17177	normal	0.001151	-0.81012	normal	0.141567	0.409101	normal	--	--	Molecular Function: aspartic-type endopeptidase activity (GO:0004190);; Biological Process: proteolysis (GO:0006508);; Cellular Component: integral component of membrane (GO:0016021);; Biological Process: protein catabolic process (GO:0030163);;	--	--	[O]	Posttranslational modification, protein turnover, chaperones	Xylanase inhibitor N-terminal;; Eukaryotic aspartyl protease	Aspartyl protease APCB1 OS=Arabidopsis thaliana OX=3702 GN=APCB1 PE=1 SV=1	O	Posttranslational modification, protein turnover, chaperones	PREDICTED: aspartyl protease APCB1 [Nicotiana attenuata]	biological process: metabolic process (GO:0008152);; molecular function: catalytic activity (GO:0003824);; cellular component: membrane (GO:0016020);; cellular component: membrane part (GO:0044425)
Niben101Scf00125g01016	Niben101Scf00125g01016	7.81319	7.73623	9.70554	6.85127	5.29677	6.27659	8.12365	9.33666	7.7892	10.782	9.58437	11.7264	0.369237	-0.23543	normal	0.053977	0.487859	normal	0.165659	-0.36299	normal	8.59e-09	-1.18544	down	0.000271	-0.65899	normal	[TK]	Signal transduction mechanisms;; Transcription	Molecular Function: GTP diphosphokinase activity (GO:0008728);; Molecular Function: guanosine-3',5'-bis(diphosphate) 3'-diphosphatase activity (GO:0008893);; Cellular Component: chloroplast (GO:0009507);; Biological Process: guanosine tetraphosphate metabolic process (GO:0015969);; Molecular Function: amino acid binding (GO:0016597);; Biological Process: response to starvation (GO:0042594);;	--	--	[T]	Signal transduction mechanisms	HD domain;; TGS domain;; Region found in RelA / SpoT proteins	Putative GTP diphosphokinase RSH1, chloroplastic OS=Arabidopsis thaliana OX=3702 GN=RSH1 PE=1 SV=1	KT	Transcription;; Signal transduction mechanisms	PREDICTED: putative GTP diphosphokinase RSH1, chloroplastic isoform X2 [Nicotiana tomentosiformis]	molecular function: catalytic activity (GO:0003824);; cellular component: cell (GO:0005623);; cellular component: organelle (GO:0043226);; cellular component: cell part (GO:0044464);; biological process: metabolic process (GO:0008152);; biological process: cellular process (GO:0009987);; biological process: single-organism process (GO:0044699);; molecular function: binding (GO:0005488);; biologic…
Niben101Scf00127g00008	Niben101Scf00127g00008	0.846964	2.26045	0.929462	2.92743	2.8008	3.31253	0.97497	0.097357	1.25764	0.627377	1.68318	0.915042	--	--	--	0.032019	-1.08904	down	--	--	--	0.054962	0.871449	normal	--	--	--	--	--	--	--	--	--	--	Domain of unknown function (DUF4228)	--	S	Function unknown	PREDICTED: uncharacterized protein LOC109244504 [Nicotiana attenuata]	--
Niben101Scf00128g03011	Niben101Scf00128g03011	6.7981	6.0441	7.87442	5.84614	9.01943	5.88584	16.1876	12.8334	13.1035	6.38457	5.97757	6.3556	0.000249	0.720003	normal	7.99e-06	1.02162	up	0.929094	0.058036	normal	0.262201	-0.28785	normal	4.61e-06	0.786351	normal	--	--	--	--	--	--	--	Protein of unknown function (DUF1336)	--	S	Function unknown	PREDICTED: uncharacterized protein LOC109230824 [Nicotiana attenuata]	--
Niben101Scf00128g04006	Niben101Scf00128g04006	0.066898	0.138806	0.283704	0.799094	0.34498	0.55052	3.06986	0.884254	1.28386	0.590537	0.654379	0.181363	9.09e-06	1.66774	up	0.027157	1.07876	up	--	--	--	0.90107	-0.09673	normal	0.02062	0.999532	normal	[MDT]	Cell wall/membrane/envelope biogenesis;; Cell cycle control, cell division, chromosome partitioning;; Signal transduction mechanisms	Molecular Function: ATP binding (GO:0005524);;	K08900|0|sot:102598548|K08900 mitochondrial chaperone BCS1 | (RefSeq) AAA-ATPase At3g28600-like	--	[O]	Posttranslational modification, protein turnover, chaperones	Domain associated at C-terminal with AAA;; ATPase family associated with various cellular activities (AAA);; AAA domain (dynein-related subfamily)	AAA-ATPase At3g28610 OS=Arabidopsis thaliana OX=3702 GN=At3g28610 PE=2 SV=1	O	Posttranslational modification, protein turnover, chaperones	PREDICTED: AAA-ATPase At3g28610-like [Nicotiana tabacum]	molecular function: binding (GO:0005488)
Niben101Scf00131g01018	Niben101Scf00131g01018	1.25513	1.71943	1.16205	5.9268	6.14403	6.85369	3.0263	4.20404	6.21634	1.09176	1.72598	1.32234	8.03e-06	1.22455	up	0.333225	-0.37759	normal	0.951208	-0.05491	normal	4.83e-18	1.69867	up	6.45e-06	1.19486	up	[S]	Function unknown	--	--	--	--	--	Protein of unknown function, DUF547;; Leucine-zipper of ternary complex factor MIP1;; Cysteine-rich secretory protein family	STS14 protein OS=Solanum tuberosum OX=4113 GN=STS14 PE=2 SV=1	S	Function unknown	PREDICTED: uncharacterized protein LOC104106708 isoform X1 [Nicotiana tomentosiformis]	--
Niben101Scf00132g02004	Niben101Scf00132g02004	34.6713	21.0347	38.0557	29.6929	26.334	36.1084	92.7495	57.3211	63.7691	41.3935	36.5179	26.6071	0.002269	0.819515	normal	1.33e-06	1.17406	up	0.740791	-0.17901	normal	0.014836	-0.58834	normal	0.009964	0.631251	normal	--	--	--	--	--	--	--	Development and cell death domain	B2 protein OS=Daucus carota OX=4039 PE=2 SV=1	S	Function unknown	PREDICTED: B2 protein-like [Nicotiana attenuata]	--
Niben101Scf00132g03003	Niben101Scf00132g03003	0.608251	0.883647	1.31598	1.82678	2.00525	2.01421	1.19082	0.869726	1.16825	0.464218	0.784037	0.362136	0.945356	-0.04772	normal	0.015945	-0.70721	normal	0.410697	0.370459	normal	1.95e-05	1.31499	up	0.150589	0.551102	normal	--	--	--	--	--	--	--	--	Protein ABIL3 OS=Arabidopsis thaliana OX=3702 GN=ABIL3 PE=2 SV=1	--	--	PREDICTED: protein ABIL2-like isoform X1 [Nicotiana tabacum]	--
Niben101Scf00138g03003	Niben101Scf00138g03003	0.310583	0.523332	0.316185	7.13299	6.37219	10.2264	2.92859	2.45018	7.64028	0.331149	0.891316	0.178513	3.09e-13	2.31788	up	0.190202	-0.62922	normal	0.880428	-0.1187	normal	9.06e-08	2.6275	up	0.003234	1.27167	up	[J]	Translation, ribosomal structure and biogenesis	Biological Process: mRNA splicing, via spliceosome (GO:0000398);; Molecular Function: ATP-dependent RNA helicase activity (GO:0004004);; Molecular Function: hydrolase activity, hydrolyzing O-glycosyl compounds (GO:0004553);; Molecular Function: ATP binding (GO:0005524);; Cellular Component: spliceosomal complex (GO:0005681);; Cellular Component: cytoplasm (GO:0005737);; Biological Process: carboh…	K12813|0|sly:101265017|K12813 pre-mRNA-splicing factor ATP-dependent RNA helicase DHX16 [EC:3.6.4.13] | (RefSeq) pre-mRNA-splicing factor ATP-dependent RNA helicase DEAH1-like	Spliceosome (ko03040)	[A]	RNA processing and modification	Helicase associated domain (HA2);; Oligonucleotide/oligosaccharide-binding (OB)-fold;; Helicase conserved C-terminal domain	Pre-mRNA-splicing factor ATP-dependent RNA helicase DEAH1 OS=Arabidopsis thaliana OX=3702 GN=ESP3 PE=1 SV=1	L	Replication, recombination and repair	PREDICTED: pre-mRNA-splicing factor ATP-dependent RNA helicase DEAH1-like [Nicotiana tabacum]	biological process: metabolic process (GO:0008152);; biological process: cellular process (GO:0009987);; molecular function: catalytic activity (GO:0003824);; molecular function: binding (GO:0005488);; cellular component: cell (GO:0005623);; cellular component: macromolecular complex (GO:0032991);; cellular component: organelle (GO:0043226);; cellular component: organelle part (GO:0044422);; cell…
Niben101Scf00143g03005	Niben101Scf00143g03005	1.67404	1.95589	1.93511	0.699902	0.064782	0.056004	0.852835	0.420692	0.388686	2.65239	2.05343	2.72582	4.49e-06	-1.48314	down	--	--	--	0.407001	-0.34475	normal	0.010425	-1.52313	down	1.28e-10	-1.99321	down	--	--	--	--	--	--	--	PB1 domain	--	S	Function unknown	PREDICTED: uncharacterized protein LOC104234173 [Nicotiana sylvestris]	--
Niben101Scf00146g00008	Niben101Scf00146g00008	2.06346	11.2302	1.1055	18.9503	45.7271	16.6854	0.323293	1.82694	4.59636	0.568229	0.941393	0.099438	0.586399	-0.27494	normal	0.023469	-1.11148	down	0.378233	0.226179	normal	2.76e-07	2.78639	up	0.349363	0.453788	normal	--	--	--	--	--	--	--	Gibberellin regulated protein	Snakin-2 OS=Solanum tuberosum OX=4113 GN=SN2 PE=1 SV=1	S	Function unknown	gibberellin-regulated protein 14 [Nicotiana benthamiana]	--
Niben101Scf00149g02017	Niben101Scf00149g02017	0.948711	0.535547	0.96947	21.6692	36.6347	46.3983	20.0524	29.8837	33.3659	0.733716	0.413614	0.28295	1.53e-53	3.88699	up	0.676654	-0.21488	normal	--	--	--	1.09e-50	4.97649	up	2.11e-59	4.44602	up	[C]	Energy production and conversion	Cellular Component: mitochondrial inner membrane (GO:0005743);; Molecular Function: NADH dehydrogenase (ubiquinone) activity (GO:0008137);; Biological Process: oxidation-reduction process (GO:0055114);; Cellular Component: respiratory chain (GO:0070469);;	K03936|3.50309e-119|csv:11123896|K03936 NADH dehydrogenase (ubiquinone) Fe-S protein 3 [EC:1.6.5.3 1.6.99.3] | (RefSeq) nad9, CusaM_p32; NADH dehydrogenase subunit 9	Oxidative phosphorylation (ko00190)	[C]	Energy production and conversion	Respiratory-chain NADH dehydrogenase, 30 Kd subunit	NADH dehydrogenase [ubiquinone] iron-sulfur protein 3 OS=Solanum tuberosum OX=4113 GN=NAD9 PE=1 SV=3	C	Energy production and conversion	NADH dehydrogenase subunit 9 (mitochondrion) [Physalis heterophylla]	cellular component: cell (GO:0005623);; cellular component: membrane (GO:0016020);; cellular component: organelle (GO:0043226);; cellular component: organelle part (GO:0044422);; cellular component: cell part (GO:0044464);; biological process: metabolic process (GO:0008152);; biological process: single-organism process (GO:0044699);; molecular function: catalytic activity (GO:0003824);; cellular …
Niben101Scf00149g03002	Niben101Scf00149g03002	0.449719	0.364671	0.554348	0.481333	0.466713	0.247897	1.20349	0.987859	0.88235	0.596548	0.423438	0.324111	0.083227	0.679359	normal	0.009613	1.08868	up	--	--	--	--	--	--	0.099663	0.660458	normal	--	--	Molecular Function: transcription factor activity, sequence-specific DNA binding (GO:0003700);; Cellular Component: nucleus (GO:0005634);; Biological Process: regulation of transcription, DNA-templated (GO:0006355);; Molecular Function: sequence-specific DNA binding (GO:0043565);;	--	--	[K]	Transcription	Myb/SANT-like DNA-binding domain	Trihelix transcription factor GT-3a OS=Arabidopsis thaliana OX=3702 GN=GT-3A PE=1 SV=1	K	Transcription	PREDICTED: trihelix transcription factor GT-3b-like [Nicotiana attenuata]	biological process: biological regulation (GO:0065007);; molecular function: nucleic acid binding transcription factor activity (GO:0001071);; cellular component: cell (GO:0005623);; cellular component: organelle (GO:0043226);; cellular component: cell part (GO:0044464);; molecular function: binding (GO:0005488)
Niben101Scf00151g10011	Niben101Scf00151g10011	12.5223	11.6408	13.0882	8.18918	5.50849	8.37733	16.5594	14.0334	13.8252	14.6037	14.2815	12.2711	0.989322	0.004767	normal	4.11e-05	0.987037	normal	0.477553	-0.20008	normal	7.72e-09	-1.26571	down	0.262025	-0.22346	normal	[F]	Nucleotide transport and metabolism	Molecular Function: aldehyde oxidase activity (GO:0004031);; Molecular Function: xanthine dehydrogenase activity (GO:0004854);; Molecular Function: iron ion binding (GO:0005506);; Cellular Component: cytosol (GO:0005829);; Molecular Function: electron carrier activity (GO:0009055);; Biological Process: xanthine catabolic process (GO:0009115);; Biological Process: auxin biosynthetic process (GO:00…	K09842|0|sot:102598224|K09842 abscisic-aldehyde oxidase [EC:1.2.3.14] | (RefSeq) abscisic-aldehyde oxidase-like	Carotenoid biosynthesis (ko00906)	[F]	Nucleotide transport and metabolism	Molybdopterin-binding domain of aldehyde dehydrogenase;; FAD binding domain in molybdopterin dehydrogenase;; Aldehyde oxidase and xanthine dehydrogenase, a/b hammerhead domain;; CO dehydrogenase flavoprotein C-terminal domain;; [2Fe-2S] binding domain;; 2Fe-2S iron-sulfur cluster binding domain	Abscisic-aldehyde oxidase OS=Arabidopsis thaliana OX=3702 GN=AAO3 PE=1 SV=1	F	Nucleotide transport and metabolism	PREDICTED: abscisic-aldehyde oxidase-like [Nicotiana attenuata]	biological process: metabolic process (GO:0008152);; biological process: single-organism process (GO:0044699);; molecular function: catalytic activity (GO:0003824);; molecular function: binding (GO:0005488);; cellular component: cell (GO:0005623);; cellular component: cell part (GO:0044464);; molecular function: electron carrier activity (GO:0009055);; biological process: cellular process (GO:000…
Niben101Scf00152g20002	Niben101Scf00152g20002	0.560022	0.755877	0.424019	1.62593	3.47942	2.10132	0.438492	0.58363	1.25295	0.19229	0.489498	0.142295	0.892731	0.096775	normal	0.002666	-1.20808	down	0.272213	0.441885	normal	5.88e-10	2.30657	up	0.083839	0.770269	normal	--	--	Cellular Component: nucleus (GO:0005634);; Biological Process: regulation of transcription, DNA-templated (GO:0006355);; Biological Process: auxin-activated signaling pathway (GO:0009734);; Biological Process: flower development (GO:0009908);; Biological Process: longitudinal axis specification (GO:0009942);; Biological Process: leaf vascular tissue pattern formation (GO:0010305);; Cellular Compo…	K14486|0|spen:107018132|K14486 auxin response factor | (RefSeq) auxin response factor 5	Plant hormone signal transduction (ko04075)	--	--	Auxin response factor;; B3 DNA binding domain;; AUX/IAA family	Auxin response factor 5 OS=Arabidopsis thaliana OX=3702 GN=ARF5 PE=1 SV=3	K	Transcription	PREDICTED: auxin response factor 5 [Nicotiana attenuata]	cellular component: cell (GO:0005623);; cellular component: organelle (GO:0043226);; cellular component: cell part (GO:0044464);; biological process: biological regulation (GO:0065007);; biological process: cellular process (GO:0009987);; biological process: signaling (GO:0023052);; biological process: single-organism process (GO:0044699);; biological process: response to stimulus (GO:0050896);; …
Niben101Scf00152g25020	Niben101Scf00152g25020	31.8415	32.9079	32.6587	30.7213	20.5991	17.3224	16.2608	23.4241	23.4054	38.6046	38.3414	43.5701	1.14e-05	-0.81802	normal	0.930006	-0.05727	normal	0.080225	-0.35015	normal	5.53e-06	-1.16249	down	2.65e-11	-1.20599	down	--	--	Molecular Function: protein disulfide isomerase activity (GO:0003756);; Biological Process: protein folding (GO:0006457);; Cellular Component: chloroplast thylakoid membrane (GO:0009535);; Cellular Component: chloroplast stroma (GO:0009570);; Biological Process: photosystem II repair (GO:0010206);; Cellular Component: integral component of membrane (GO:0016021);; Molecular Function: heat shock pr…	--	--	--	--	--	Protein SPA, chloroplastic OS=Solanum lycopersicum OX=4081 GN=SPA PE=2 SV=1	S	Function unknown	PREDICTED: protein SPA, chloroplastic [Nicotiana attenuata]	molecular function: catalytic activity (GO:0003824);; biological process: cellular process (GO:0009987);; cellular component: cell (GO:0005623);; cellular component: membrane (GO:0016020);; cellular component: organelle (GO:0043226);; cellular component: organelle part (GO:0044422);; cellular component: cell part (GO:0044464);; biological process: metabolic process (GO:0008152);; cellular compone…
Niben101Scf00153g00020	Niben101Scf00153g00020	1.51009	2.13761	1.31136	2.43651	5.31554	2.21455	1.16201	1.90789	1.32997	0.778301	1.57736	0.706367	0.405513	-0.3462	normal	0.036696	-0.8702	normal	0.406655	0.367728	normal	0.00474	1.10459	up	0.758797	0.161114	normal	--	--	Molecular Function: protein dimerization activity (GO:0046983);;	--	--	--	--	Helix-loop-helix DNA-binding domain	Transcription factor ICE1 OS=Arabidopsis thaliana OX=3702 GN=SCRM PE=1 SV=1	K	Transcription	PREDICTED: transcription factor ICE1-like, partial [Nicotiana tabacum]	molecular function: binding (GO:0005488)
Niben101Scf00157g07009	Niben101Scf00157g07009	7.38705	6.48337	6.18212	3.44708	2.56481	3.91539	9.84245	8.67887	5.6864	6.22293	5.69959	7.7571	0.961486	0.025788	normal	6.41e-05	1.18279	up	0.94839	-0.04816	normal	1.46e-07	-1.33613	down	0.926915	-0.04279	normal	--	--	Cellular Component: endoplasmic reticulum (GO:0005783);; Cellular Component: integral component of membrane (GO:0016021);;	--	--	[S]	Function unknown	DDRGK domain	DDRGK domain-containing protein 1 OS=Arabidopsis thaliana OX=3702 GN=At4g27120 PE=2 SV=1	S	Function unknown	PREDICTED: DDRGK domain-containing protein 1 [Nicotiana tomentosiformis]	cellular component: cell (GO:0005623);; cellular component: organelle (GO:0043226);; cellular component: cell part (GO:0044464);; cellular component: membrane (GO:0016020);; cellular component: membrane part (GO:0044425)
Niben101Scf00163g00010	Niben101Scf00163g00010	2.74854	4.05218	3.32854	3.71083	11.8762	4.21313	2.84999	1.93342	3.79848	1.75529	2.62062	2.03644	0.27164	-0.41188	normal	0.07676	-0.82888	normal	0.21795	0.424963	normal	0.010265	1.01579	up	0.885614	0.072359	normal	[M]	Cell wall/membrane/envelope biogenesis	Molecular Function: catalytic activity (GO:0003824);; Molecular Function: coenzyme binding (GO:0050662);;	--	--	[V]	Defense mechanisms	NAD dependent epimerase/dehydratase family;; 3-beta hydroxysteroid dehydrogenase/isomerase family;; GDP-mannose 4,6 dehydratase;; NAD(P)H-binding;; Male sterility protein;; NmrA-like family;; Polysaccharide biosynthesis protein	Cinnamoyl-CoA reductase 1 OS=Oryza sativa subsp. japonica OX=39947 GN=CCR1 PE=1 SV=1	M	Cell wall/membrane/envelope biogenesis	PREDICTED: cinnamoyl-CoA reductase 2-like [Nicotiana sylvestris]	molecular function: catalytic activity (GO:0003824);; molecular function: binding (GO:0005488)
Niben101Scf00163g04004	Niben101Scf00163g04004	1.10671	0.841343	0.499455	0.655215	1.78468	0.747732	2.46195	3.36032	2.14922	0.835928	1.19624	0.799162	1.72e-05	1.21885	up	0.003174	1.13248	up	0.787081	-0.17887	normal	0.618939	-0.2453	normal	2.36e-05	1.04392	up	--	--	Cellular Component: integral component of membrane (GO:0016021);; Biological Process: transmembrane transport (GO:0055085);;	--	--	[S]	Function unknown	Membrane transport protein;; Protein kinase domain	Protein PIN-LIKES 1 OS=Arabidopsis thaliana OX=3702 GN=PILS1 PE=2 SV=1	S	Function unknown	PREDICTED: protein PIN-LIKES 1-like isoform X1 [Nicotiana tomentosiformis]	cellular component: membrane (GO:0016020);; cellular component: membrane part (GO:0044425);; biological process: localization (GO:0051179)
Niben101Scf00163g08018	Niben101Scf00163g08018	1.88464	2.1498	2.36296	5.60402	8.33036	5.09132	1.76438	3.90647	4.69442	1.32254	2.26201	0.852497	0.462707	0.344522	normal	0.140141	-0.64883	normal	0.610645	0.272275	normal	3.15e-06	1.51343	up	0.084594	0.69406	normal	[P]	Inorganic ion transport and metabolism	Molecular Function: superoxide dismutase activity (GO:0004784);; Biological Process: removal of superoxide radicals (GO:0019430);; Molecular Function: metal ion binding (GO:0046872);; Biological Process: oxidation-reduction process (GO:0055114);;	K04564|2.10399e-155|sot:102594810|K04564 superoxide dismutase, Fe-Mn family [EC:1.15.1.1] | (RefSeq) superoxide dismutase [Fe], chloroplastic	Peroxisome (ko04146)	[P]	Inorganic ion transport and metabolism	Iron/manganese superoxide dismutases, C-terminal domain;; Iron/manganese superoxide dismutases, alpha-hairpin domain	Superoxide dismutase [Fe] 2, chloroplastic OS=Arabidopsis thaliana OX=3702 GN=FSD2 PE=1 SV=1	P	Inorganic ion transport and metabolism	PREDICTED: superoxide dismutase [Fe], chloroplastic-like [Nicotiana attenuata]	biological process: metabolic process (GO:0008152);; biological process: cellular process (GO:0009987);; biological process: single-organism process (GO:0044699);; biological process: response to stimulus (GO:0050896);; biological process: detoxification (GO:0098754);; molecular function: catalytic activity (GO:0003824);; molecular function: antioxidant activity (GO:0016209);; molecular function:…
Niben101Scf00163g13002	Niben101Scf00163g13002	48.9569	40.7718	43.7645	32.466	24.2308	34.0404	59.1813	45.231	40.0897	47.7041	47.0906	55.2629	0.716407	-0.12208	normal	0.014881	0.676749	normal	0.410223	-0.22555	normal	6.33e-08	-1.11232	down	0.093157	-0.37594	normal	--	--	Cellular Component: integral component of membrane (GO:0016021);; Molecular Function: heat shock protein binding (GO:0031072);; Molecular Function: unfolded protein binding (GO:0051082);;	--	--	--	--	--	Protein ORANGE, chloroplastic OS=Arabidopsis thaliana OX=3702 GN=OR PE=1 SV=1	S	Function unknown	PREDICTED: uncharacterized protein LOC104094979 [Nicotiana tomentosiformis]	cellular component: membrane (GO:0016020);; cellular component: membrane part (GO:0044425);; molecular function: binding (GO:0005488)
Niben101Scf00163g15003	Niben101Scf00163g15003	0.917706	0.723602	0.902796	0.921312	0.868882	0.949267	1.6958	1.90356	1.11309	1.90093	1.44301	2.20612	0.265846	0.484528	normal	0.12003	0.687478	normal	0.028167	-0.67655	normal	0.000128	-1.30972	down	0.220449	-0.48193	normal	--	--	Biological Process: regulation of cyclin-dependent protein serine/threonine kinase activity (GO:0000079);; Molecular Function: kinase activity (GO:0016301);; Molecular Function: protein kinase binding (GO:0019901);;	--	--	[R]	General function prediction only	Cyclin;; Cyclin, N-terminal domain	Cyclin-U4-1 OS=Arabidopsis thaliana OX=3702 GN=CYCU4-1 PE=1 SV=1	S	Function unknown	PREDICTED: cyclin-U4-1-like [Nicotiana tomentosiformis]	biological process: biological regulation (GO:0065007);; molecular function: catalytic activity (GO:0003824);; molecular function: binding (GO:0005488)
Niben101Scf00163g22002	Niben101Scf00163g22002	12.5496	4.78438	28.6864	5.14335	13.1923	3.57638	78.787	45.0344	44.4407	6.42228	13.0473	5.46638	0.161653	0.66984	normal	3.67e-11	2.30614	up	0.750806	0.16142	normal	0.282286	-0.52335	normal	3.37e-15	2.09819	up	--	--	Molecular Function: DNA binding (GO:0003677);; Molecular Function: transcription factor activity, sequence-specific DNA binding (GO:0003700);; Cellular Component: nucleus (GO:0005634);; Biological Process: regulation of transcription, DNA-templated (GO:0006355);; Biological Process: defense response (GO:0006952);; Biological Process: ethylene-activated signaling pathway (GO:0009873);;	K09286|4.14717e-90|sot:102585187|K09286 EREBP-like factor | (RefSeq) ethylene-responsive transcription factor 5-like	--	--	--	AP2 domain	Ethylene-responsive transcription factor 5 OS=Nicotiana sylvestris OX=4096 GN=ERF5 PE=2 SV=1	K	Transcription	PREDICTED: ethylene-responsive transcription factor 5-like [Nicotiana tabacum]	molecular function: binding (GO:0005488);; biological process: biological regulation (GO:0065007);; molecular function: nucleic acid binding transcription factor activity (GO:0001071);; cellular component: cell (GO:0005623);; cellular component: organelle (GO:0043226);; cellular component: cell part (GO:0044464);; biological process: response to stimulus (GO:0050896);; biological process: cellula…
Niben101Scf00163g22003	Niben101Scf00163g22003	0.433972	0.432412	0.292398	2.19586	1.93607	1.58157	10.0177	5.84352	8.28208	0	0.428089	0.061356	6.68e-21	2.87025	up	1.55e-08	1.76966	up	--	--	--	--	--	--	5.75e-23	3.36551	up	--	--	Biological Process: transcription, DNA-templated (GO:0006351);; Biological Process: regulation of cellular process (GO:0050794);;	K09286|4.36721e-33|sot:102585187|K09286 EREBP-like factor | (RefSeq) ethylene-responsive transcription factor 5-like	--	--	--	AP2 domain	Ethylene-responsive transcription factor 5 OS=Nicotiana tabacum OX=4097 GN=ERF5 PE=2 SV=1	K	Transcription	ethylene-responsive transcription factor 5 [Nicotiana tabacum]	biological process: metabolic process (GO:0008152);; biological process: cellular process (GO:0009987);; biological process: biological regulation (GO:0065007)
Niben101Scf00163g22004	Niben101Scf00163g22004	5.69689	1.26532	12.3588	1.28578	5.85808	1.58048	28.4379	22.3986	16.5455	1.88487	10.8126	2.52156	0.273272	0.541214	normal	1.05e-08	2.16502	up	0.950641	0.038356	normal	0.354161	-0.64075	normal	0.061747	0.880994	normal	--	--	Biological Process: transcription, DNA-templated (GO:0006351);; Biological Process: response to auxin (GO:0009733);; Biological Process: regulation of ethylene biosynthetic process (GO:0010364);;	K09286|1.23378e-71|spen:107015179|K09286 EREBP-like factor | (RefSeq) ethylene-responsive transcription factor 5-like	--	--	--	--	Ethylene-responsive transcription factor 5 OS=Nicotiana tabacum OX=4097 GN=ERF5 PE=2 SV=1	K	Transcription	ethylene-responsive transcription factor 5 [Nicotiana tabacum]	biological process: metabolic process (GO:0008152);; biological process: cellular process (GO:0009987);; biological process: response to stimulus (GO:0050896);; biological process: biological regulation (GO:0065007)
Niben101Scf00165g01004	Niben101Scf00165g01004	4.62845	3.07061	2.14479	8.19557	13.8818	5.81825	2.41514	3.09771	4.45377	1.24246	2.01006	1.0781	0.788552	-0.16476	normal	0.003788	-1.1152	down	0.114389	0.553858	normal	2.91e-08	1.97353	up	0.080092	0.685804	normal	--	--	Molecular Function: signal transducer activity (GO:0004871);; Biological Process: defense response (GO:0006952);; Biological Process: signal transduction (GO:0007165);; Cellular Component: plasmodesma (GO:0009506);; Cellular Component: integral component of membrane (GO:0016021);; Cellular Component: anchored component of plasma membrane (GO:0046658);;	--	--	--	--	Late embryogenesis abundant protein	NDR1/HIN1-like protein 1 OS=Arabidopsis thaliana OX=3702 GN=NHL1 PE=2 SV=1	S	Function unknown	PREDICTED: protein YLS9-like [Nicotiana sylvestris]	molecular function: signal transducer activity (GO:0004871);; biological process: response to stimulus (GO:0050896);; biological process: cellular process (GO:0009987);; biological process: biological regulation (GO:0065007);; cellular component: cell junction (GO:0030054);; cellular component: membrane (GO:0016020);; cellular component: membrane part (GO:0044425);; cellular component: cell (GO:0…
Niben101Scf00167g00014	Niben101Scf00167g00014	16.6096	12.4368	15.8673	9.49683	9.56924	9.41258	15.4006	10.1965	13.5217	18.9155	19.2004	20.8354	0.106137	-0.41227	normal	0.058175	0.493911	normal	0.060787	-0.41113	normal	3.21e-22	-1.45198	down	1.5e-06	-0.88477	normal	--	--	Cellular Component: vacuolar membrane (GO:0005774);; Molecular Function: L-cystine transmembrane transporter activity (GO:0015184);; Biological Process: L-cystine transport (GO:0015811);; Cellular Component: integral component of membrane (GO:0016021);;	K12386|1.41738e-161|sot:102589367|K12386 cystinosin | (RefSeq) cystinosin homolog	--	[E]	Amino acid transport and metabolism	PQ loop repeat	Cystinosin homolog OS=Arabidopsis thaliana OX=3702 GN=At5g40670 PE=2 SV=1	U	Intracellular trafficking, secretion, and vesicular transport	PREDICTED: cystinosin homolog [Nicotiana sylvestris]	cellular component: cell (GO:0005623);; cellular component: membrane (GO:0016020);; cellular component: organelle (GO:0043226);; cellular component: organelle part (GO:0044422);; cellular component: cell part (GO:0044464);; biological process: single-organism process (GO:0044699);; biological process: localization (GO:0051179);; molecular function: transporter activity (GO:0005215);; cellular com…
Niben101Scf00167g01003	Niben101Scf00167g01003	2.22472	1.24664	2.26693	5.62021	3.3614	3.68483	0.59195	0.652397	1.41726	0.377875	0.924604	1.57018	--	--	--	0.003493	-1.33914	down	--	--	--	0.014691	1.25253	up	--	--	--	--	--	Cellular Component: integral component of membrane (GO:0016021);;	--	--	--	--	Protein of unknown function (DUF3339)	--	S	Function unknown	PREDICTED: uncharacterized protein LOC104222265 [Nicotiana sylvestris]	cellular component: membrane (GO:0016020);; cellular component: membrane part (GO:0044425)
Niben101Scf00167g03003	Niben101Scf00167g03003	6.64335	6.16645	7.78246	3.55166	1.85881	3.82735	10.4145	8.0202	5.41462	7.78129	10.2134	9.67158	0.952816	-0.03226	normal	0.000571	1.18938	up	0.043849	-0.43254	normal	5.15e-12	-1.85898	down	0.059337	-0.49991	normal	[O]	Posttranslational modification, protein turnover, chaperones	Molecular Function: metalloendopeptidase activity (GO:0004222);; Biological Process: proteolysis (GO:0006508);;	--	--	--	--	Peptidase family M48	--	O	Posttranslational modification, protein turnover, chaperones	PREDICTED: protease HtpX homolog [Nicotiana tabacum]	biological process: metabolic process (GO:0008152);; molecular function: catalytic activity (GO:0003824)
Niben101Scf00167g04011	Niben101Scf00167g04011	6.43601	4.29159	8.05787	4.11481	2.84401	1.95898	3.9105	3.16586	3.04317	4.93389	6.23175	4.52389	0.000276	-0.98548	normal	0.724906	0.204878	normal	0.825606	0.141631	normal	0.000251	-1.1291	down	1.14e-05	-0.90178	normal	[C]	Energy production and conversion	Molecular Function: ATP binding (GO:0005524);; Cellular Component: plasma membrane (GO:0005886);; Cellular Component: chloroplast thylakoid membrane (GO:0009535);; Biological Process: ATP synthesis coupled proton transport (GO:0015986);; Biological Process: ATP hydrolysis coupled proton transport (GO:0015991);; Cellular Component: proton-transporting ATP synthase complex, catalytic core F(1) (GO:…	K02111|0|sot:4099854|K02111 F-type H+-transporting ATPase subunit alpha [EC:3.6.3.14] | (RefSeq) atpA, SotuCp006; ATP synthase CF1 alpha subunit	Oxidative phosphorylation (ko00190);; Photosynthesis (ko00195)	[C]	Energy production and conversion	ATP synthase alpha/beta family, nucleotide-binding domain;; ATP synthase alpha/beta chain, C terminal domain;; ATP synthase alpha/beta family, beta-barrel domain	ATP synthase subunit alpha, chloroplastic OS=Nicotiana sylvestris OX=4096 GN=atpA PE=3 SV=1	C	Energy production and conversion	ATP synthase CF1 alpha subunit [Nicotiana sylvestris]	molecular function: binding (GO:0005488);; cellular component: cell (GO:0005623);; cellular component: membrane (GO:0016020);; cellular component: cell part (GO:0044464);; cellular component: organelle (GO:0043226);; cellular component: organelle part (GO:0044422);; biological process: metabolic process (GO:0008152);; biological process: cellular process (GO:0009987);; biological process: single-…
Niben101Scf00167g04017	Niben101Scf00167g04017	3.66769	1.24119	3.39777	2.2014	1.32649	1.32695	3.56375	1.30902	1.83407	2.23855	3.69307	2.46159	0.480184	-0.37736	normal	0.5231	0.387468	normal	0.965731	-0.04383	normal	0.001494	-1.07242	down	0.194131	-0.52075	normal	[C]	Energy production and conversion	Molecular Function: DNA binding (GO:0003677);; Molecular Function: structural constituent of ribosome (GO:0003735);; Molecular Function: DNA-directed 5'-3' RNA polymerase activity (GO:0003899);; Cellular Component: plasma membrane (GO:0005886);; Biological Process: transcription, DNA-templated (GO:0006351);; Biological Process: translation (GO:0006412);; Cellular Component: chloroplast thylakoid …	K02108|0|mtr:MTR_0002s0530|K02108 F-type H+-transporting ATPase subunit a | (RefSeq) ATP synthase F0, A subunit	Oxidative phosphorylation (ko00190);; Photosynthesis (ko00195)	[C]	Energy production and conversion	Ribosomal protein S2;; ATP synthase A chain	ATP synthase subunit a, chloroplastic OS=Nicotiana tabacum OX=4097 GN=atpI PE=3 SV=1	C	Energy production and conversion	ATP synthase F0, A subunit [Medicago truncatula]	molecular function: binding (GO:0005488);; molecular function: structural molecule activity (GO:0005198);; molecular function: catalytic activity (GO:0003824);; cellular component: cell (GO:0005623);; cellular component: membrane (GO:0016020);; cellular component: cell part (GO:0044464);; biological process: metabolic process (GO:0008152);; biological process: cellular process (GO:0009987);; cell…
Niben101Scf00167g05001	Niben101Scf00167g05001	1.06222	0.847692	0	0.681005	0.592705	0.875389	1.2492	0.678258	0.889081	1.44506	1.01333	1.08449	0.927765	0.055373	normal	0.581621	0.341672	normal	0.87624	-0.06124	normal	0.011529	-1.00637	down	0.202286	-0.53524	normal	[T]	Signal transduction mechanisms	Molecular Function: voltage-gated potassium channel activity (GO:0005249);; Cellular Component: integral component of plasma membrane (GO:0005887);; Biological Process: regulation of membrane potential (GO:0042391);; Biological Process: potassium ion transmembrane transport (GO:0071805);;	--	--	[PT]	Inorganic ion transport and metabolism;; Signal transduction mechanisms	Cyclic nucleotide-binding domain;; Ion transport protein;; Ankyrin repeats (3 copies);; Ion channel;; Ankyrin repeats (many copies);; Ankyrin repeats (many copies);; Ankyrin repeat;; Ankyrin repeat	Potassium channel AKT2/3 OS=Arabidopsis thaliana OX=3702 GN=AKT2 PE=1 SV=1	U	Intracellular trafficking, secretion, and vesicular transport	PREDICTED: potassium channel AKT2/3-like [Nicotiana tabacum]	biological process: cellular process (GO:0009987);; biological process: single-organism process (GO:0044699);; biological process: localization (GO:0051179);; biological process: biological regulation (GO:0065007);; molecular function: transporter activity (GO:0005215);; cellular component: cell (GO:0005623);; cellular component: membrane (GO:0016020);; cellular component: membrane part (GO:00444…
Niben101Scf00168g07003	Niben101Scf00168g07003	4.52359	3.54388	7.12288	3.76644	3.08278	3.31192	10.785	6.55944	6.26969	4.59841	5.39492	4.59007	0.475016	0.311501	normal	8.33e-05	1.13362	up	0.996109	-0.00435	normal	1.13e-05	-0.90781	normal	0.277516	0.326667	normal	[D]	Cell cycle control, cell division, chromosome partitioning	Cellular Component: integral component of membrane (GO:0016021);;	--	--	[R]	General function prediction only	Ankyrin repeats (3 copies);; Ankyrin repeats (many copies);; Ankyrin repeats (many copies);; Ankyrin repeat;; Ankyrin repeat;; Domain of unknown function	Ankyrin repeat-containing protein At5g02620 OS=Arabidopsis thaliana OX=3702 GN=At5g02620 PE=1 SV=1	S	Function unknown	PREDICTED: ankyrin repeat-containing protein At5g02620-like isoform X1 [Nicotiana sylvestris]	cellular component: membrane (GO:0016020);; cellular component: membrane part (GO:0044425)
Niben101Scf00168g10008	Niben101Scf00168g10008	0.61841	0	0.178964	1.45622	1.06416	1.07273	0.165779	0.483859	0.616198	0.075949	0.129035	0.34581	--	--	--	0.072022	-0.92096	normal	--	--	--	0.001498	1.60485	up	--	--	--	[T]	Signal transduction mechanisms	Molecular Function: kinase activity (GO:0016301);; Biological Process: phosphorylation (GO:0016310);;	--	--	[T]	Signal transduction mechanisms	Protein kinase domain;; Protein tyrosine kinase	Mitogen-activated protein kinase kinase kinase 18 OS=Arabidopsis thaliana OX=3702 GN=MAPKKK18 PE=1 SV=1	T	Signal transduction mechanisms	PREDICTED: mitogen-activated protein kinase kinase kinase NPK1-like [Nicotiana sylvestris]	molecular function: catalytic activity (GO:0003824);; biological process: metabolic process (GO:0008152);; biological process: cellular process (GO:0009987)
Niben101Scf00173g00010	Niben101Scf00173g00010	44.715	48.4868	54.1767	24.5916	26.1149	29.0234	21.0321	31.3024	24.3366	23.0001	35.8406	20.1912	3.85e-09	-1.10662	down	0.973349	0.016044	normal	0.000504	0.697255	normal	0.096178	-0.38944	normal	0.214126	-0.33871	normal	[G]	Carbohydrate transport and metabolism	Molecular Function: transporter activity (GO:0005215);; Cellular Component: integral component of membrane (GO:0016021);; Biological Process: transmembrane transport (GO:0055085);;	--	--	[R]	General function prediction only	Major Facilitator Superfamily;; Major Facilitator Superfamily	--	G	Carbohydrate transport and metabolism	PREDICTED: hippocampus abundant transcript-like protein 1 isoform X2 [Nicotiana attenuata]	molecular function: transporter activity (GO:0005215);; cellular component: membrane (GO:0016020);; cellular component: membrane part (GO:0044425);; biological process: localization (GO:0051179)
Niben101Scf00176g05002	Niben101Scf00176g05002	8.62401	9.48001	8.46737	5.9596	5.6347	5.55929	5.96767	5.81648	6.42844	8.88185	8.99574	8.19137	4.76e-07	-0.75659	normal	0.61466	0.149401	normal	0.935092	-0.04646	normal	1.12e-09	-1.00886	down	2.82e-08	-0.82664	normal	--	--	Molecular Function: NAD+ ADP-ribosyltransferase activity (GO:0003950);; Molecular Function: metal ion binding (GO:0046872);;	--	--	--	--	--	--	S	Function unknown	PREDICTED: uncharacterized protein LOC109220407 [Nicotiana attenuata]	molecular function: catalytic activity (GO:0003824);; molecular function: binding (GO:0005488)
Niben101Scf00176g05004	Niben101Scf00176g05004	641.577	735.891	688.396	524.141	362.462	334.344	412.306	446.651	455.301	793.118	667.733	750.011	1.63e-12	-0.87318	normal	0.720315	0.152084	normal	0.622667	-0.16395	normal	1.88e-07	-1.22112	down	5.67e-13	-1.05924	down	--	--	Molecular Function: calcium ion binding (GO:0005509);; Cellular Component: photosystem II oxygen evolving complex (GO:0009654);; Biological Process: photosynthesis (GO:0015979);; Cellular Component: extrinsic component of membrane (GO:0019898);;	K08901|1.48563e-110|sot:102602034|K08901 photosystem II oxygen-evolving enhancer protein 3 | (RefSeq) oxygen-evolving enhancer protein 3-2, chloroplastic	Photosynthesis (ko00195)	--	--	Oxygen evolving enhancer protein 3 (PsbQ);; Protein of unknown function (DUF1218)	Oxygen-evolving enhancer protein 3, chloroplastic OS=Spinacia oleracea OX=3562 GN=PSBQ PE=1 SV=1	S	Function unknown	PREDICTED: oxygen-evolving enhancer protein 3-2, chloroplastic-like [Nicotiana sylvestris]	molecular function: binding (GO:0005488);; cellular component: cell (GO:0005623);; cellular component: membrane (GO:0016020);; cellular component: macromolecular complex (GO:0032991);; cellular component: membrane part (GO:0044425);; cellular component: cell part (GO:0044464);; biological process: metabolic process (GO:0008152);; biological process: cellular process (GO:0009987)
Niben101Scf00176g07004	Niben101Scf00176g07004	0.631364	0.265779	0.614707	0.305411	0.374182	0.496913	1.15978	0.655499	0.374162	0.811398	2.28684	0.798341	0.799157	0.180158	normal	0.226701	0.665694	normal	0.060424	-0.61165	normal	1.7e-05	-1.77	down	0.065457	-0.79452	normal	[T]	Signal transduction mechanisms	--	--	--	--	--	Salt stress response/antifungal;; Protein kinase domain;; Protein tyrosine kinase	Cysteine-rich receptor-like protein kinase 25 OS=Arabidopsis thaliana OX=3702 GN=CRK25 PE=3 SV=1	T	Signal transduction mechanisms	PREDICTED: putative receptor-like protein kinase At4g00960 [Nicotiana sylvestris]	--
Niben101Scf00176g08005	Niben101Scf00176g08005	3.15937	2.85236	3.85431	2.15815	1.96214	2.93395	5.5534	3.36252	2.34737	3.84778	4.62122	4.23875	0.938753	-0.04876	normal	0.148851	0.618961	normal	0.22102	-0.36058	normal	1.76e-08	-1.21911	down	0.184198	-0.44542	normal	--	--	Cellular Component: integral component of membrane (GO:0016021);;	--	--	--	--	--	--	S	Function unknown	PREDICTED: uncharacterized protein LOC107802193 isoform X2 [Nicotiana tabacum]	cellular component: membrane (GO:0016020);; cellular component: membrane part (GO:0044425)
Niben101Scf00176g09013	Niben101Scf00176g09013	0.277943	1.17438	0.251698	0.809191	2.33353	1.94479	0.194845	0.257687	0.964468	0.038355	0.20924	0.284911	--	--	--	0.048983	-1.02029	down	--	--	--	1.8e-05	2.04892	up	--	--	--	[G]	Carbohydrate transport and metabolism	Molecular Function: hydrolase activity, hydrolyzing O-glycosyl compounds (GO:0004553);; Cellular Component: cell wall (GO:0005618);; Biological Process: xyloglucan metabolic process (GO:0010411);; Molecular Function: xyloglucan:xyloglucosyl transferase activity (GO:0016762);; Biological Process: cell wall biogenesis (GO:0042546);; Cellular Component: apoplast (GO:0048046);; Biological Process: ce…	K08235|0|sly:101261871|K08235 xyloglucan:xyloglucosyl transferase [EC:2.4.1.207] | (RefSeq) probable xyloglucan endotransglucosylase/hydrolase protein 8	--	--	--	Glycosyl hydrolases family 16;; Xyloglucan endo-transglycosylase (XET) C-terminus	Probable xyloglucan endotransglucosylase/hydrolase protein 8 OS=Arabidopsis thaliana OX=3702 GN=XTH8 PE=2 SV=2	--	--	PREDICTED: probable xyloglucan endotransglucosylase/hydrolase protein 8 [Nicotiana attenuata]	molecular function: catalytic activity (GO:0003824);; cellular component: cell (GO:0005623);; cellular component: cell part (GO:0044464);; biological process: metabolic process (GO:0008152);; biological process: cellular process (GO:0009987);; biological process: cellular component organization or biogenesis (GO:0071840);; cellular component: extracellular region (GO:0005576)
Niben101Scf00176g09014	Niben101Scf00176g09014	2.09964	2.0108	2.07307	5.08405	4.72029	4.56802	3.02839	3.23966	4.3833	1.46801	1.72448	1.35537	0.077855	0.481243	normal	0.30401	-0.33714	normal	0.516569	0.27586	normal	3.31e-08	1.1838	up	0.000776	0.808401	normal	[O]	Posttranslational modification, protein turnover, chaperones	Cellular Component: endoplasmic reticulum (GO:0005783);;	K19371|0|sot:102583196|K19371 DnaJ homolog subfamily C member 25 | (RefSeq) chaperone protein dnaJ 50	--	[O]	Posttranslational modification, protein turnover, chaperones	DnaJ domain	DnaJ protein ERDJ7 OS=Oryza sativa subsp. japonica OX=39947 GN=ERDJ7 PE=3 SV=1	O	Posttranslational modification, protein turnover, chaperones	PREDICTED: chaperone protein dnaJ 50 [Nicotiana sylvestris]	cellular component: cell (GO:0005623);; cellular component: organelle (GO:0043226);; cellular component: cell part (GO:0044464)
Niben101Scf00177g06009	Niben101Scf00177g06009	9.96797	7.73529	8.94562	5.45251	4.93837	6.38016	10.6953	8.43969	7.106	10.5024	10.9921	11.962	0.390925	-0.24765	normal	0.011481	0.663269	normal	0.092799	-0.36263	normal	7.2e-16	-1.38915	down	0.000845	-0.65314	normal	[BQ]	Chromatin structure and dynamics;; Secondary metabolites biosynthesis, transport and catabolism	--	--	--	[B]	Chromatin structure and dynamics	Histone deacetylase domain;; Histone deacetylase domain	Histone deacetylase 14 OS=Arabidopsis thaliana OX=3702 GN=HDA14 PE=1 SV=1	BQ	Chromatin structure and dynamics;; Secondary metabolites biosynthesis, transport and catabolism	PREDICTED: histone deacetylase 14 isoform X1 [Nicotiana attenuata]	--
Niben101Scf00180g04010	Niben101Scf00180g04010	1.00412	1.02457	0.726604	1.4955	3.43539	1.91879	1.15161	1.00314	1.14889	0.671641	0.595528	0.609497	0.978148	0.015781	normal	0.02614	-0.81327	normal	0.492901	0.310875	normal	7.33e-05	1.27318	up	0.183468	0.416902	normal	[K]	Transcription	--	--	--	--	--	Protein tyrosine kinase;; Protein kinase domain;; Leucine rich repeat;; Protein tyrosine kinase;; Protein kinase domain	Protein STRUBBELIG-RECEPTOR FAMILY 3 OS=Arabidopsis thaliana OX=3702 GN=SRF3 PE=2 SV=1	T	Signal transduction mechanisms	PREDICTED: protein STRUBBELIG-RECEPTOR FAMILY 3-like [Nicotiana attenuata]	--
Niben101Scf00188g00003	Niben101Scf00188g00003	0.488572	1.00676	0.495049	1.69154	3.02011	2.24417	0.2712	0.434698	1.14496	0.261122	0.153587	0.224551	--	--	--	0.01056	-1.19124	down	--	--	--	1.22e-08	2.34686	up	--	--	--	--	--	--	--	--	--	--	Protein of unknown function (DUF642);; Protein of unknown function (DUF642);; Protein of unknown function (DUF642)	--	S	Function unknown	PREDICTED: uncharacterized protein LOC109227389 [Nicotiana attenuata]	--
Niben101Scf00189g03001	Niben101Scf00189g03001	3.29363	3.1874	3.48296	7.1924	7.77337	5.86065	9.28442	6.64879	10.149	1.49901	1.63087	0.165082	0.005301	0.904952	normal	0.462298	0.341183	normal	0.22264	0.434605	normal	0.000607	1.66735	up	4.65e-06	1.73279	up	--	--	--	--	--	--	--	--	--	S	Function unknown	PREDICTED: uncharacterized protein LOC104240541 [Nicotiana sylvestris]	--
Niben101Scf00189g06007	Niben101Scf00189g06007	2.64298	3.11455	5.19236	3.57969	4.47048	4.66936	11.9835	7.74591	6.3626	2.18533	3.61128	2.87432	0.022928	0.790545	normal	0.002596	0.967948	normal	0.813768	0.165117	normal	0.765899	0.11518	normal	0.000102	1.08962	up	--	--	Cellular Component: membrane (GO:0016020);; Molecular Function: metal ion binding (GO:0046872);;	--	--	[O]	Posttranslational modification, protein turnover, chaperones	Ring finger domain;; RING-like zinc finger;; RING-H2 zinc finger domain;; Zinc finger, C3HC4 type (RING finger);; Zinc finger, C3HC4 type (RING finger);; Anaphase-promoting complex subunit 11 RING-H2 finger	RING-H2 finger protein ATL54 OS=Arabidopsis thaliana OX=3702 GN=ATL54 PE=2 SV=2	O	Posttranslational modification, protein turnover, chaperones	PREDICTED: RING-H2 finger protein ATL52-like [Nicotiana sylvestris]	cellular component: membrane (GO:0016020);; molecular function: binding (GO:0005488)
Niben101Scf00193g01009	Niben101Scf00193g01009	1.97304	1.28858	1.8709	0.820549	0.809681	1.07265	2.2994	1.00208	1.35588	1.40982	1.77381	1.74244	0.546913	-0.30146	normal	0.152717	0.669451	normal	0.993549	-0.00967	normal	4.02e-05	-1.19237	down	0.40617	-0.34691	normal	--	--	Molecular Function: DNA binding (GO:0003677);; Cellular Component: nucleus (GO:0005634);; Biological Process: regulation of transcription, DNA-templated (GO:0006355);;	--	--	--	--	No apical meristem (NAM) protein	NAC transcription factor 29 OS=Arabidopsis thaliana OX=3702 GN=NAC029 PE=2 SV=1	K	Transcription	PREDICTED: NAC transcription factor 29-like [Nicotiana tomentosiformis]	molecular function: binding (GO:0005488);; cellular component: cell (GO:0005623);; cellular component: organelle (GO:0043226);; cellular component: cell part (GO:0044464);; biological process: biological regulation (GO:0065007)
Niben101Scf00193g03008	Niben101Scf00193g03008	13.2717	14.3826	14.1508	9.06924	10.2308	7.97025	11.4562	9.84289	11.104	13.0416	15.7675	12.9572	0.000127	-0.59136	normal	0.219499	0.306941	normal	0.893694	-0.06541	normal	1.79e-10	-1.02155	down	1.55e-06	-0.68107	normal	--	--	Molecular Function: structural constituent of ribosome (GO:0003735);; Biological Process: translation (GO:0006412);; Biological Process: transport (GO:0006810);; Cellular Component: integral component of membrane (GO:0016021);;	K13354|0|spen:107017952|K13354 solute carrier family 25 (peroxisomal adenine nucleotide transporter), member 17 | (RefSeq) peroxisomal nicotinamide adenine dinucleotide carrier-like	Peroxisome (ko04146)	[C]	Energy production and conversion	Mitochondrial carrier protein	Peroxisomal nicotinamide adenine dinucleotide carrier OS=Arabidopsis thaliana OX=3702 GN=PXN PE=1 SV=1	S	Function unknown	PREDICTED: peroxisomal nicotinamide adenine dinucleotide carrier-like [Nicotiana tabacum]	molecular function: structural molecule activity (GO:0005198);; biological process: metabolic process (GO:0008152);; biological process: cellular process (GO:0009987);; biological process: localization (GO:0051179);; cellular component: membrane (GO:0016020);; cellular component: membrane part (GO:0044425)
Niben101Scf00199g05004	Niben101Scf00199g05004	0.147282	0.288361	0.105732	0.579917	2.16126	0.993989	0.097218	0.261145	0.322363	0.11591	0.181569	0.02539	--	--	--	0.000617	-1.50244	down	--	--	--	2.19e-06	2.26482	up	--	--	--	--	--	Molecular Function: transcription factor activity, sequence-specific DNA binding (GO:0003700);; Cellular Component: nucleus (GO:0005634);; Biological Process: regulation of transcription, DNA-templated (GO:0006355);; Biological Process: asymmetric cell division (GO:0008356);; Biological Process: gravitropism (GO:0009630);; Biological Process: radial pattern formation (GO:0009956);; Molecular Func…	--	--	--	--	GRAS domain family	Protein SCARECROW OS=Ipomoea nil OX=35883 GN=SCR PE=1 SV=1	K	Transcription	PREDICTED: protein SCARECROW-like [Nicotiana attenuata]	biological process: biological regulation (GO:0065007);; molecular function: nucleic acid binding transcription factor activity (GO:0001071);; cellular component: cell (GO:0005623);; cellular component: organelle (GO:0043226);; cellular component: cell part (GO:0044464);; biological process: cellular process (GO:0009987);; biological process: single-organism process (GO:0044699);; biological proc…
Niben101Scf00203g00011	Niben101Scf00203g00011	0.78988	0.905707	0.534938	0.571734	2.87399	0.435706	0.237031	0.13368	0.48748	0.492816	0.456597	0.537379	0.004485	-1.0841	down	0.035182	-1.0902	down	0.53874	0.301289	normal	0.240937	0.675698	normal	0.058057	-0.80022	normal	--	--	--	--	--	--	--	Plant protein of unknown function (DUF936);; Plant protein of unknown function (DUF936)	--	S	Function unknown	PREDICTED: uncharacterized protein LOC104248419 isoform X1 [Nicotiana sylvestris]	--
Niben101Scf00207g02007	Niben101Scf00207g02007	0.352949	0.566853	0.55475	0.912703	1.12239	1.13495	0.809768	0.557749	0.645402	0.430418	0.333182	0.304466	0.807846	0.145788	normal	0.166717	-0.51293	normal	0.744012	0.208979	normal	0.000894	1.04396	up	0.234672	0.470954	normal	--	--	Molecular Function: calcium ion binding (GO:0005509);; Molecular Function: calcium-dependent phospholipid binding (GO:0005544);; Cellular Component: endoplasmic reticulum (GO:0005783);; Cellular Component: plasma membrane (GO:0005886);; Cellular Component: plasmodesma (GO:0009506);; Cellular Component: integral component of membrane (GO:0016021);;	--	--	--	--	Plant phosphoribosyltransferase C-terminal;; C2 domain	Protein QUIRKY OS=Arabidopsis thaliana OX=3702 GN=QKY PE=2 SV=1	S	Function unknown	PREDICTED: protein QUIRKY [Nicotiana attenuata]	molecular function: binding (GO:0005488);; cellular component: cell (GO:0005623);; cellular component: organelle (GO:0043226);; cellular component: cell part (GO:0044464);; cellular component: membrane (GO:0016020);; cellular component: cell junction (GO:0030054);; cellular component: membrane part (GO:0044425)
Niben101Scf00207g03002	Niben101Scf00207g03002	2.77005	1.44596	3.40709	1.34758	3.08073	2.16474	10.4862	5.86314	6.57088	2.02946	2.54285	2.14562	0.001521	1.04374	up	2.05e-06	1.55658	up	0.940315	0.069572	normal	0.267197	-0.43173	normal	1.23e-06	1.26151	up	--	--	--	--	--	--	--	--	--	--	--	PREDICTED: DNA ligase 1-like [Nicotiana attenuata]	--
Niben101Scf00212g01017	Niben101Scf00212g01017	26.3737	18.572	27.2342	7.52564	11.6609	10.4384	8.55433	11.0512	9.80545	13.8274	11.3859	4.59384	7.06e-13	-1.4166	down	0.893325	0.064825	normal	0.249101	0.443765	normal	0.324591	-0.40756	normal	0.469523	-0.30418	normal	--	--	--	--	--	--	--	Plant protein of unknown function (DUF641)	60S ribosomal protein L7-2 OS=Arabidopsis thaliana OX=3702 GN=RPL7B PE=1 SV=1	S	Function unknown	PREDICTED: IRK-interacting protein-like [Nicotiana attenuata]	--
Niben101Scf00214g00007	Niben101Scf00214g00007	2.0374	1.87232	0.562694	3.43622	5.43282	3.28292	1.29933	1.13956	1.75291	0.974771	1.09369	0.96753	0.74163	-0.2176	normal	0.000432	-1.20281	down	0.760482	0.196767	normal	1.39e-05	1.407	up	0.866263	0.101366	normal	--	--	--	--	--	--	--	--	--	S	Function unknown	PREDICTED: uncharacterized protein LOC109233933 [Nicotiana attenuata]	--
Niben101Scf00214g07004	Niben101Scf00214g07004	41.3975	14.7479	15.3555	20.7757	20.3028	49.5827	9.83133	8.79786	15.8655	13.6576	13.5131	7.99736	0.010019	-0.94687	normal	0.012297	-1.02918	down	0.15852	0.51317	normal	0.03888	0.820792	normal	0.453201	-0.30775	normal	--	--	--	--	--	--	--	Wound-induced protein	--	S	Function unknown	PREDICTED: uncharacterized protein LOC104215531 [Nicotiana sylvestris]	--
Niben101Scf00215g00024	Niben101Scf00215g00024	3.07803	2.05167	1.53075	3.82759	4.00346	3.94483	3.28458	2.34469	2.69334	1.15309	1.15558	1.45919	0.918691	0.063385	normal	0.25983	-0.3893	normal	0.289871	0.428575	normal	2.42e-05	1.12753	up	0.028016	0.684928	normal	[O]	Posttranslational modification, protein turnover, chaperones	Cellular Component: integral component of membrane (GO:0016021);;	--	--	[O]	Posttranslational modification, protein turnover, chaperones	DnaJ domain	Chaperone protein dnaJ 72 OS=Arabidopsis thaliana OX=3702 GN=ATJ72 PE=2 SV=1	O	Posttranslational modification, protein turnover, chaperones	PREDICTED: chaperone protein dnaJ 72 [Nicotiana sylvestris]	cellular component: membrane (GO:0016020);; cellular component: membrane part (GO:0044425)
Niben101Scf00215g05003	Niben101Scf00215g05003	8.48883	8.75258	7.16851	6.51171	4.91752	4.86224	6.91723	7.43864	5.9776	8.56524	8.26013	9.3804	0.011522	-0.48097	normal	0.283334	0.352306	normal	0.665087	-0.16339	normal	1.03e-06	-1.06595	down	0.000169	-0.6764	normal	[K]	Transcription	Molecular Function: plastid sigma factor activity (GO:0001053);; Molecular Function: DNA binding (GO:0003677);; Molecular Function: transcription factor activity, sequence-specific DNA binding (GO:0003700);; Biological Process: DNA-templated transcription, initiation (GO:0006352);; Biological Process: regulation of transcription, DNA-templated (GO:0006355);; Biological Process: tRNA metabolic pro…	--	--	--	--	Sigma-70 region 3;; Sigma-70 region 2;; Sigma-70, region 4	RNA polymerase sigma factor sigB OS=Arabidopsis thaliana OX=3702 GN=SIGB PE=2 SV=2	K	Transcription	PREDICTED: RNA polymerase sigma factor sigB-like isoform X1 [Nicotiana attenuata]	biological process: biological regulation (GO:0065007);; molecular function: transcription factor activity, protein binding (GO:0000988);; molecular function: binding (GO:0005488);; molecular function: nucleic acid binding transcription factor activity (GO:0001071);; biological process: metabolic process (GO:0008152);; biological process: cellular process (GO:0009987);; cellular component: cell (…
Niben101Scf00219g07014	Niben101Scf00219g07014	7.89512	6.05049	7.94125	5.2179	3.21629	3.80239	10.6798	7.49931	9.23178	9.67535	10.276	6.8712	0.866893	0.06963	normal	8.7e-05	1.09091	up	0.366848	-0.30137	normal	1.62e-08	-1.45339	down	0.278901	-0.2859	normal	--	--	Molecular Function: transporter activity (GO:0005215);; Cellular Component: intracellular (GO:0005622);; Biological Process: transport (GO:0006810);;	--	--	[I]	Lipid transport and metabolism	CRAL/TRIO domain;; CRAL/TRIO, N-terminal domain;; Divergent CRAL/TRIO domain	Phosphatidylinositol/phosphatidylcholine transfer protein SFH11 OS=Arabidopsis thaliana OX=3702 GN=SFH11 PE=3 SV=1	S	Function unknown	PREDICTED: random slug protein 5-like [Nicotiana attenuata]	molecular function: transporter activity (GO:0005215);; cellular component: cell (GO:0005623);; cellular component: cell part (GO:0044464);; biological process: localization (GO:0051179)
Niben101Scf00219g07016	Niben101Scf00219g07016	12.6154	13.1272	15.7908	53.5868	49.0124	61.9177	33.1935	80.1812	70.4914	14.1989	15.6311	16.9068	4.4e-10	1.6096	up	0.71353	0.197222	normal	0.512029	-0.21457	normal	3.88e-16	1.3502	up	9.46e-09	1.44543	up	--	--	Cellular Component: cytosol (GO:0005829);; Cellular Component: integral component of membrane (GO:0016021);; Molecular Function: hydroxypyruvate reductase activity (GO:0016618);; Molecular Function: glyoxylate reductase (NADP) activity (GO:0030267);;	--	--	--	--	--	Uncharacterized protein At1g01500 OS=Arabidopsis thaliana OX=3702 GN=At1g01500 PE=2 SV=1	S	Function unknown	PREDICTED: uncharacterized protein At1g01500-like [Nicotiana attenuata]	cellular component: cell (GO:0005623);; cellular component: cell part (GO:0044464);; cellular component: membrane (GO:0016020);; cellular component: membrane part (GO:0044425);; biological process: metabolic process (GO:0008152);; biological process: single-organism process (GO:0044699);; molecular function: catalytic activity (GO:0003824)
Niben101Scf00220g03014	Niben101Scf00220g03014	66.1669	73.9037	77.001	57.2976	50.599	39.8497	48.531	48.9584	54.6899	81.3289	74.5135	73.0124	3.41e-07	-0.73293	normal	0.800972	0.101137	normal	0.696296	-0.14078	normal	3.85e-07	-1.02404	down	5.96e-11	-0.90469	normal	--	--	Cellular Component: chloroplast thylakoid membrane (GO:0009535);; Cellular Component: integral component of membrane (GO:0016021);;	--	--	--	--	CAAD domains of cyanobacterial aminoacyl-tRNA synthetase	Protein CURVATURE THYLAKOID 1C, chloroplastic OS=Arabidopsis thaliana OX=3702 GN=CURT1C PE=1 SV=1	S	Function unknown	PREDICTED: protein CURVATURE THYLAKOID 1C, chloroplastic [Nicotiana sylvestris]	cellular component: cell (GO:0005623);; cellular component: membrane (GO:0016020);; cellular component: organelle (GO:0043226);; cellular component: organelle part (GO:0044422);; cellular component: cell part (GO:0044464);; cellular component: membrane part (GO:0044425)
Niben101Scf00220g04015	Niben101Scf00220g04015	186.423	200.672	180.237	132.972	94.2065	77.9109	112.978	120.09	119.305	194.042	164.899	179.454	3.06e-16	-0.90981	normal	0.536038	0.243621	normal	0.991432	-0.00907	normal	1.4e-06	-1.18023	down	3.07e-10	-0.92532	normal	--	--	Cellular Component: photosystem I reaction center (GO:0009538);; Biological Process: photosynthesis (GO:0015979);;	K02695|5.6952e-64|sot:102578347|K02695 photosystem I subunit VI | (RefSeq) photosystem I reaction center subunit VI-2, chloroplastic	Photosynthesis (ko00195)	--	--	Photosystem I reaction centre subunit VI	Photosystem I reaction center subunit VI, chloroplastic OS=Brassica campestris OX=3711 GN=PSAH PE=2 SV=1	S	Function unknown	PREDICTED: photosystem I reaction center subunit VI-1, chloroplastic [Nicotiana sylvestris]	cellular component: cell (GO:0005623);; cellular component: membrane (GO:0016020);; cellular component: macromolecular complex (GO:0032991);; cellular component: membrane part (GO:0044425);; cellular component: cell part (GO:0044464);; biological process: metabolic process (GO:0008152);; biological process: cellular process (GO:0009987)
Niben101Scf00220g05001	Niben101Scf00220g05001	0.304683	0.573786	0.457262	0.961907	1.28049	0.631851	0.120535	0.54354	0.674704	0.383824	0.217044	0.276454	0.844836	-0.14606	normal	0.242872	-0.66587	normal	0.681647	0.241513	normal	0.006747	1.08615	up	0.81702	0.157596	normal	[L]	Replication, recombination and repair	Molecular Function: DNA binding (GO:0003677);; Molecular Function: ATP-dependent DNA helicase activity (GO:0004003);; Molecular Function: ATP binding (GO:0005524);; Cellular Component: nucleus (GO:0005634);; Biological Process: nucleobase-containing compound metabolic process (GO:0006139);; Biological Process: DNA duplex unwinding (GO:0032508);;	K11273|0|sly:101246354|K11273 chromosome transmission fidelity protein 1 [EC:3.6.4.13] | (RefSeq) ATP-dependent DNA helicase DDX11	--	[L]	Replication, recombination and repair	DEAD_2;; Helicase C-terminal domain;; DEAD/DEAH box helicase;; Type III restriction enzyme, res subunit;; PhoH-like protein	Regulator of telomere elongation helicase 1 homolog OS=Arabidopsis thaliana OX=3702 GN=RTEL1 PE=3 SV=1	L	Replication, recombination and repair	PREDICTED: probable ATP-dependent RNA helicase DDX11 isoform X3 [Nicotiana sylvestris]	molecular function: binding (GO:0005488);; biological process: cellular process (GO:0009987);; biological process: cellular component organization or biogenesis (GO:0071840);; molecular function: catalytic activity (GO:0003824);; cellular component: cell (GO:0005623);; cellular component: organelle (GO:0043226);; cellular component: cell part (GO:0044464);; biological process: metabolic process (…
Niben101Scf00225g05002	Niben101Scf00225g05002	0.126783	0.274376	0.303516	0.663809	0.419163	0.755822	0.636292	0.476127	0.402317	0.167455	0.21008	0.134869	0.194652	0.587659	normal	0.799838	-0.17025	normal	--	--	--	0.002883	1.20791	up	0.01154	0.93757	normal	[TK]	Signal transduction mechanisms;; Transcription	Biological Process: phosphorelay signal transduction system (GO:0000160);; Cellular Component: intracellular (GO:0005622);;	K12130|0|spen:107015290|K12130 pseudo-response regulator 5 | (RefSeq) two-component response regulator-like APRR5	Circadian rhythm - plant (ko04712)	[K]	Transcription	Response regulator receiver domain;; CCT motif	Two-component response regulator-like APRR5 OS=Arabidopsis thaliana OX=3702 GN=APRR5 PE=1 SV=2	K	Transcription	PREDICTED: two-component response regulator-like APRR9 [Nicotiana attenuata]	biological process: cellular process (GO:0009987);; biological process: signaling (GO:0023052);; biological process: single-organism process (GO:0044699);; biological process: response to stimulus (GO:0050896);; biological process: biological regulation (GO:0065007);; cellular component: cell (GO:0005623);; cellular component: cell part (GO:0044464)
Niben101Scf00225g06013	Niben101Scf00225g06013	14.2182	5.4045	18.8179	5.11501	9.99056	14.8633	56.8642	22.6136	26.0434	9.43045	17.4815	6.90689	0.235449	0.59816	normal	0.000285	1.43007	up	0.966193	0.038914	normal	0.25959	-0.51936	normal	0.00211	1.05697	up	--	--	--	--	--	--	--	--	--	S	Function unknown	PREDICTED: uncharacterized protein LOC104099339 [Nicotiana tomentosiformis]	--
Niben101Scf00225g06014	Niben101Scf00225g06014	8.19119	2.66578	7.59712	4.5371	5.84835	9.90285	27.7736	15.3246	18.2388	3.10434	5.33864	3.0824	0.002204	1.08599	up	0.000127	1.35118	up	0.606004	0.276325	normal	0.502635	0.334693	normal	1.11e-09	1.73992	up	--	--	--	--	--	--	--	--	--	S	Function unknown	PREDICTED: uncharacterized protein LOC107808455 [Nicotiana tabacum]	--
Niben101Scf00225g07019	Niben101Scf00225g07019	12.5046	10.9118	10.9971	7.32193	6.97424	6.6145	13.7002	11.1015	11.5609	14.3545	13.7482	14.6565	0.63001	-0.15495	normal	0.00063	0.806388	normal	0.247835	-0.33245	normal	8.79e-13	-1.41135	down	0.007826	-0.54367	normal	--	--	--	--	--	--	--	Senescence regulator	--	S	Function unknown	PREDICTED: uncharacterized protein LOC109210135 [Nicotiana attenuata]	--
Niben101Scf00229g01002	Niben101Scf00229g01002	86.9332	75.7885	79.6292	32.4863	26.2691	37.0385	73.269	37.155	41.5801	98.7972	71.0975	91.7993	0.001397	-0.81415	normal	0.070418	0.644282	normal	0.674466	-0.17241	normal	2.45e-16	-1.80598	down	7.92e-05	-1.01425	down	[H]	Coenzyme transport and metabolism	Biological Process: metabolic process (GO:0008152);; Molecular Function: hydrolase activity (GO:0016787);;	K07025|0|spen:107031720|K07025 putative hydrolase of the HAD superfamily | (RefSeq) uncharacterized LOC107031720	--	[R]	General function prediction only	Haloacid dehalogenase-like hydrolase;; haloacid dehalogenase-like hydrolase;; HAD-hyrolase-like	--	S	Function unknown	PREDICTED: uncharacterized protein LOC109241417 [Nicotiana attenuata]	biological process: metabolic process (GO:0008152);; molecular function: catalytic activity (GO:0003824)
Niben101Scf00231g07011	Niben101Scf00231g07011	2.25435	2.91004	3.02303	1.15322	1.27845	0.685709	1.29878	1.2465	1.59768	2.71513	2.44442	3.86107	0.000147	-1.04294	down	0.463221	0.390873	normal	0.815786	-0.15591	normal	1.13e-07	-1.77153	down	5.32e-06	-1.26693	down	--	--	Cellular Component: integral component of plasma membrane (GO:0005887);; Biological Process: phospholipid metabolic process (GO:0006644);; Biological Process: signal transduction (GO:0007165);; Molecular Function: phosphatidate phosphatase activity (GO:0008195);; Biological Process: phospholipid dephosphorylation (GO:0046839);;	--	--	[I]	Lipid transport and metabolism	PAP2 superfamily;; PPR repeat family;; PPR repeat;; PPR repeat;; Pentatricopeptide repeat domain	Putative lipid phosphate phosphatase 3, chloroplastic OS=Arabidopsis thaliana OX=3702 GN=LPP3 PE=2 SV=1	I	Lipid transport and metabolism	PREDICTED: probable lipid phosphate phosphatase 4 [Nicotiana tabacum]	cellular component: cell (GO:0005623);; cellular component: membrane (GO:0016020);; cellular component: membrane part (GO:0044425);; cellular component: cell part (GO:0044464);; biological process: metabolic process (GO:0008152);; biological process: cellular process (GO:0009987);; biological process: single-organism process (GO:0044699);; biological process: biological regulation (GO:0065007);; …
Niben101Scf00231g07029	Niben101Scf00231g07029	1.9149	0.890842	3.88978	2.33512	3.7546	2.73074	12.1636	7.86455	6.71185	2.30378	5.80248	1.52612	0.001839	1.16944	up	7.98e-06	1.41629	up	0.74515	-0.20081	normal	0.384785	-0.45002	normal	0.02087	0.887033	normal	--	--	--	--	--	--	--	Protein of unknown function (DUF1645)	--	S	Function unknown	PREDICTED: uncharacterized protein LOC109241637 [Nicotiana attenuata]	--
Niben101Scf00233g00005	Niben101Scf00233g00005	43.8369	52.1784	61.9267	32.9848	27.7002	21.6952	23.246	30.7987	29.7292	54.1282	50.5822	51.6812	4.39e-08	-1.07697	down	0.874547	0.080766	normal	0.933145	-0.05389	normal	8.87e-10	-1.29893	down	1.43e-13	-1.18924	down	[R]	General function prediction only	Molecular Function: alditol:NADP+ 1-oxidoreductase activity (GO:0004032);; Cellular Component: chloroplast stroma (GO:0009570);; Cellular Component: chloroplast envelope (GO:0009941);; Biological Process: oxidation-reduction process (GO:0055114);;	--	--	[C]	Energy production and conversion	Aldo/keto reductase family	Probable voltage-gated potassium channel subunit beta OS=Arabidopsis thaliana OX=3702 GN=KAB1 PE=1 SV=1	C	Energy production and conversion	PREDICTED: protein tas-like, partial [Nicotiana tabacum]	biological process: metabolic process (GO:0008152);; biological process: single-organism process (GO:0044699);; molecular function: catalytic activity (GO:0003824);; cellular component: cell (GO:0005623);; cellular component: organelle (GO:0043226);; cellular component: organelle part (GO:0044422);; cellular component: cell part (GO:0044464)
Niben101Scf00233g00006	Niben101Scf00233g00006	16.7589	20.7571	22.6683	16.0576	11.5592	9.71943	9.60954	12.8333	12.2848	25.4918	24.3324	24.293	3.91e-05	-0.9413	normal	0.955453	-0.03823	normal	0.343161	-0.31039	normal	1.54e-07	-1.33205	down	7.79e-13	-1.34652	down	[R]	General function prediction only	Molecular Function: alditol:NADP+ 1-oxidoreductase activity (GO:0004032);; Cellular Component: chloroplast stroma (GO:0009570);; Cellular Component: chloroplast envelope (GO:0009941);; Biological Process: oxidation-reduction process (GO:0055114);;	--	--	[C]	Energy production and conversion	Aldo/keto reductase family	--	C	Energy production and conversion	PREDICTED: protein tas-like, partial [Nicotiana tabacum]	biological process: metabolic process (GO:0008152);; biological process: single-organism process (GO:0044699);; molecular function: catalytic activity (GO:0003824);; cellular component: cell (GO:0005623);; cellular component: organelle (GO:0043226);; cellular component: organelle part (GO:0044422);; cellular component: cell part (GO:0044464)
Niben101Scf00234g02026	Niben101Scf00234g02026	0.322955	0.37151	0.418324	0.483404	0.36862	0.732118	0.64057	0.465344	0.460657	0.138306	0.165563	0.123358	0.779267	0.176781	normal	0.963259	0.040559	normal	--	--	--	--	--	--	0.006851	1.07159	up	--	--	Molecular Function: acetylglucosaminyltransferase activity (GO:0008375);; Cellular Component: membrane (GO:0016020);;	--	--	[G]	Carbohydrate transport and metabolism	Core-2/I-Branching enzyme;; Core-2/I-Branching enzyme	Beta-glucuronosyltransferase GlcAT14A OS=Arabidopsis thaliana OX=3702 GN=GLCAT14A PE=2 SV=1	S	Function unknown	PREDICTED: beta-glucuronosyltransferase GlcAT14C-like [Nicotiana tomentosiformis]	molecular function: catalytic activity (GO:0003824);; cellular component: membrane (GO:0016020)
Niben101Scf00238g09004	Niben101Scf00238g09004	0.712731	0.688939	0.149969	1.08315	2.17165	0.837775	0.511757	0.302617	0.765025	0.207818	0.676813	0.329358	0.881399	-0.11573	normal	0.069148	-0.89362	normal	0.920881	0.083116	normal	0.028108	1.04883	up	0.971401	0.028784	normal	--	--	Cellular Component: nucleus (GO:0005634);; Biological Process: regulation of cell cycle (GO:0051726);;	K18812|2.53837e-136|sot:102586594|K18812 cyclin D6, plant | (RefSeq) putative cyclin-D6-1	--	[D]	Cell cycle control, cell division, chromosome partitioning	Cyclin, N-terminal domain;; Cyclin, C-terminal domain	Putative cyclin-D6-1 OS=Arabidopsis thaliana OX=3702 GN=CYCD6-1 PE=3 SV=1	D	Cell cycle control, cell division, chromosome partitioning	PREDICTED: putative cyclin-D6-1 [Nicotiana sylvestris]	cellular component: cell (GO:0005623);; cellular component: organelle (GO:0043226);; cellular component: cell part (GO:0044464);; biological process: biological regulation (GO:0065007)
Niben101Scf00244g01013	Niben101Scf00244g01013	1.23951	1.56924	1.10293	1.58349	3.71899	2.18978	0.722648	0.896414	1.29131	0.917875	0.668599	0.523429	0.134641	-0.54868	normal	0.008593	-1.0228	down	0.206515	0.474846	normal	0.001118	1.19731	up	0.884267	0.086998	normal	--	--	--	--	--	--	--	NPH3 family	BTB/POZ domain-containing protein At3g08570 OS=Arabidopsis thaliana OX=3702 GN=At3g08570 PE=2 SV=2	S	Function unknown	PREDICTED: BTB/POZ domain-containing protein At3g08570-like isoform X1 [Nicotiana tabacum]	--
Niben101Scf00245g03004	Niben101Scf00245g03004	198.046	231.954	219.472	160.219	107.108	71.4751	80.4104	146.655	127.023	255.195	208.253	261.224	2.54e-06	-1.0205	down	0.884508	0.099583	normal	0.495296	-0.21456	normal	1.08e-06	-1.40804	down	5.6e-09	-1.26926	down	--	--	Biological Process: response to light stimulus (GO:0009416);; Cellular Component: photosystem I (GO:0009522);; Cellular Component: chloroplast thylakoid membrane (GO:0009535);; Biological Process: photosynthesis, light harvesting in photosystem I (GO:0009768);; Cellular Component: chloroplast envelope (GO:0009941);; Cellular Component: plastoglobule (GO:0010287);; Cellular Component: integral com…	K08910|8.55839e-162|sot:102583646|K08910 light-harvesting complex I chlorophyll a/b binding protein 4 | (RefSeq) chlorophyll a-b binding protein 4, chloroplastic-like	Photosynthesis - antenna proteins (ko00196)	--	--	Chlorophyll A-B binding protein;; EF hand;; EF-hand domain;; EF-hand domain pair;; EF hand;; EF-hand domain pair	Chlorophyll a-b binding protein 4, chloroplastic OS=Arabidopsis thaliana OX=3702 GN=LHCA4 PE=1 SV=1	S	Function unknown	PREDICTED: chlorophyll a-b binding protein P4, chloroplastic-like [Nicotiana tomentosiformis]	biological process: response to stimulus (GO:0050896);; cellular component: cell (GO:0005623);; cellular component: membrane (GO:0016020);; cellular component: macromolecular complex (GO:0032991);; cellular component: membrane part (GO:0044425);; cellular component: cell part (GO:0044464);; cellular component: organelle (GO:0043226);; cellular component: organelle part (GO:0044422);; biological p…
Niben101Scf00245g05007	Niben101Scf00245g05007	3.19398	3.15279	1.76451	7.42526	10.1775	6.94044	1.54721	1.27134	4.63285	0.873238	1.44755	0.278529	0.700686	-0.24239	normal	0.003837	-1.21646	down	0.027257	0.68424	normal	4.69e-11	2.42942	up	0.116857	0.742956	normal	--	--	--	--	--	--	--	Gibberellin regulated protein	Gibberellin-regulated protein 6 OS=Arabidopsis thaliana OX=3702 GN=GASA6 PE=3 SV=1	S	Function unknown	gibberellin-regulated protein 6 [Nicotiana benthamiana]	--
Niben101Scf00246g06012	Niben101Scf00246g06012	0.452425	0.458632	0.263526	1.14813	1.84472	0.864427	0.215473	0.254695	0.768422	0.289746	0.360401	0.223044	--	--	--	0.050718	-0.9896	normal	--	--	--	0.000928	1.4008	up	--	--	--	--	--	--	--	--	--	--	--	--	S	Function unknown	hypothetical protein A4A49_19830 [Nicotiana attenuata]	--
Niben101Scf00248g00005	Niben101Scf00248g00005	63.5948	60.0988	70.3851	44.1716	28.8653	28.6806	43.7178	44.7626	41.6069	72.1177	67.5044	65.0783	2.77e-08	-0.79384	normal	0.265532	0.378298	normal	0.69458	-0.14066	normal	4.38e-09	-1.36101	down	6.73e-13	-0.96721	normal	--	--	Biological Process: response to oxidative stress (GO:0006979);; Cellular Component: chloroplast thylakoid membrane (GO:0009535);;	--	--	--	--	--	Photosynthetic NDH subunit of subcomplex B 5, chloroplastic OS=Arabidopsis thaliana OX=3702 GN=PNSB5 PE=2 SV=1	S	Function unknown	PREDICTED: uncharacterized protein LOC104248250 [Nicotiana sylvestris]	biological process: response to stimulus (GO:0050896);; cellular component: cell (GO:0005623);; cellular component: membrane (GO:0016020);; cellular component: organelle (GO:0043226);; cellular component: organelle part (GO:0044422);; cellular component: cell part (GO:0044464)
Niben101Scf00248g02007	Niben101Scf00248g02007	1.84105	1.62413	1.52591	2.58203	3.62532	3.71372	2.46	1.66682	2.40308	0.841654	1.30161	0.842387	0.770837	0.125636	normal	0.140426	-0.47655	normal	0.119252	0.487392	normal	3.53e-07	1.23095	up	0.009375	0.709349	normal	[E]	Amino acid transport and metabolism	--	--	--	[O]	Posttranslational modification, protein turnover, chaperones	Prolyl oligopeptidase family;; alpha/beta hydrolase fold;; alpha/beta hydrolase fold;; Dienelactone hydrolase family;; WD40-like Beta Propeller Repeat	Acylamino-acid-releasing enzyme OS=Arabidopsis thaliana OX=3702 GN=AARE PE=1 SV=1	E	Amino acid transport and metabolism	PREDICTED: acylamino-acid-releasing enzyme-like isoform X2 [Nicotiana sylvestris]	--
Niben101Scf00248g02011	Niben101Scf00248g02011	100.807	91.9649	93.723	54.728	41.0064	49.7219	78.2776	64.2973	60.3019	100.956	87.2965	99.1143	4.82e-06	-0.7107	normal	0.053518	0.509177	normal	0.861476	-0.0807	normal	6.97e-12	-1.3631	down	2.66e-06	-0.8095	normal	--	--	Cellular Component: chloroplast thylakoid membrane (GO:0009535);; Biological Process: defense response to fungus, incompatible interaction (GO:0009817);; Cellular Component: chloroplast envelope (GO:0009941);; Biological Process: NADH dehydrogenase complex (plastoquinone) assembly (GO:0010258);; Molecular Function: oxidoreductase activity, acting on NAD(P)H, quinone or similar compound as accepto…	--	--	--	--	NADH-quinone oxidoreductase cyanobacterial subunit N	NAD(P)H-quinone oxidoreductase subunit N, chloroplastic OS=Arabidopsis thaliana OX=3702 GN=ndhN PE=2 SV=1	C	Energy production and conversion	PREDICTED: uncharacterized protein LOC104223835 [Nicotiana sylvestris]	cellular component: cell (GO:0005623);; cellular component: membrane (GO:0016020);; cellular component: organelle (GO:0043226);; cellular component: organelle part (GO:0044422);; cellular component: cell part (GO:0044464);; biological process: immune system process (GO:0002376);; biological process: response to stimulus (GO:0050896);; biological process: multi-organism process (GO:0051704);; biol…
Niben101Scf00253g03001	Niben101Scf00253g03001	0.292167	0.440334	0.0629	0.632292	5.54524	1.30793	0.307168	0.254152	0.684973	0.098034	0.133531	0.131749	--	--	--	0.005719	-1.33795	down	--	--	--	4.22e-08	2.68851	up	--	--	--	[HJ]	Coenzyme transport and metabolism;; Translation, ribosomal structure and biogenesis	--	K14487|0|sot:102580803|K14487 auxin responsive GH3 gene family | (RefSeq) indole-3-acetic acid-amido synthetase GH3.6-like	Plant hormone signal transduction (ko04075)	--	--	GH3 auxin-responsive promoter	Indole-3-acetic acid-amido synthetase GH3.6 OS=Arabidopsis thaliana OX=3702 GN=GH3.6 PE=1 SV=1	S	Function unknown	PREDICTED: indole-3-acetic acid-amido synthetase GH3.6 [Nicotiana attenuata]	--
Niben101Scf00254g00005	Niben101Scf00254g00005	1.89783	1.10751	1.23796	0.876824	0.818146	0.872921	1.19934	2.11453	1.20459	1.64712	2.28759	1.60958	--	--	--	--	--	--	0.748821	-0.20558	normal	0.002671	-1.2642	down	0.313607	-0.46944	normal	--	--	Molecular Function: ATP binding (GO:0005524);; Cellular Component: mitochondrion (GO:0005739);; Cellular Component: chloroplast stroma (GO:0009570);; Cellular Component: stromule (GO:0010319);; Molecular Function: monodehydroascorbate reductase (NADH) activity (GO:0016656);; Biological Process: oxidation-reduction process (GO:0055114);;	K08232|5.79994e-37|sot:102583368|K08232 monodehydroascorbate reductase (NADH) [EC:1.6.5.4] | (RefSeq) monodehydroascorbate reductase 5, mitochondrial	Ascorbate and aldarate metabolism (ko00053)	[R]	General function prediction only	--	Monodehydroascorbate reductase, chloroplastic/mitochondrial OS=Arabidopsis thaliana OX=3702 GN=MDAR5 PE=1 SV=3	S	Function unknown	PREDICTED: monodehydroascorbate reductase, chloroplastic isoform X1 [Nicotiana sylvestris]	molecular function: binding (GO:0005488);; cellular component: cell (GO:0005623);; cellular component: organelle (GO:0043226);; cellular component: cell part (GO:0044464);; cellular component: organelle part (GO:0044422);; biological process: metabolic process (GO:0008152);; biological process: single-organism process (GO:0044699);; molecular function: catalytic activity (GO:0003824)
Niben101Scf00254g07001	Niben101Scf00254g07001	14.8809	9.42452	4.90002	14.3304	27.8861	28.5113	11.218	14.7168	9.0015	6.48267	5.666	3.30645	0.976787	0.021665	normal	0.02527	-0.79626	normal	0.262928	0.447724	normal	4.29e-07	1.58249	up	0.029623	0.708959	normal	--	--	Molecular Function: zinc ion binding (GO:0008270);; Cellular Component: integral component of membrane (GO:0016021);;	K16281|2.31512e-114|spen:107027944|K16281 RING-H2 zinc finger protein RHA1 | (RefSeq) E3 ubiquitin-protein ligase RHA1B-like	--	[O]	Posttranslational modification, protein turnover, chaperones	Ring finger domain;; RING-like zinc finger;; Zinc finger, C3HC4 type (RING finger);; zinc-RING finger domain;; RING-H2 zinc finger domain;; Zinc finger, C3HC4 type (RING finger);; RING-type zinc-finger;; Anaphase-promoting complex subunit 11 RING-H2 finger	E3 ubiquitin-protein ligase RHA1B OS=Arabidopsis thaliana OX=3702 GN=RHA1B PE=2 SV=1	O	Posttranslational modification, protein turnover, chaperones	PREDICTED: E3 ubiquitin-protein ligase RHA1B [Nicotiana sylvestris]	molecular function: binding (GO:0005488);; cellular component: membrane (GO:0016020);; cellular component: membrane part (GO:0044425)
Niben101Scf00262g01003	Niben101Scf00262g01003	9.26828	5.86208	10.1057	5.30307	7.87202	3.11381	48.5104	26.7999	25.3592	6.37989	4.89569	7.14848	3.4e-08	1.47024	up	1.68e-12	2.21207	up	0.550336	0.269389	normal	0.12402	-0.57379	normal	1.52e-13	1.84745	up	--	--	Molecular Function: uniporter activity (GO:0015292);; Cellular Component: integral component of membrane (GO:0016021);; Biological Process: transmembrane transport (GO:0055085);;	K20858|4.30785e-85|sot:102586929|K20858 calcium uniporter protein, mitochondrial | (RefSeq) calcium uniporter protein 6, mitochondrial-like	--	[R]	General function prediction only	Lateral organ boundaries (LOB) domain	Calcium uniporter protein 5, mitochondrial OS=Arabidopsis thaliana OX=3702 GN=At1g57610 PE=2 SV=1	S	Function unknown	PREDICTED: mitochondrial calcium uniporter regulatory subunit MCUb-like [Nicotiana sylvestris]	biological process: localization (GO:0051179);; molecular function: transporter activity (GO:0005215);; cellular component: membrane (GO:0016020);; cellular component: membrane part (GO:0044425)
Niben101Scf00262g04006	Niben101Scf00262g04006	0.734909	1.32083	2.90492	0.786928	1.07893	0.498946	0.70963	0.52173	1.51259	1.41997	3.34152	1.29821	0.218265	-0.6124	normal	--	--	--	0.881985	-0.11802	normal	0.001362	-1.44262	down	0.020595	-0.97827	normal	--	--	Molecular Function: DNA binding (GO:0003677);; Molecular Function: transcription factor activity, sequence-specific DNA binding (GO:0003700);; Cellular Component: nucleus (GO:0005634);; Biological Process: regulation of transcription, DNA-templated (GO:0006355);; Biological Process: defense response (GO:0006952);; Biological Process: response to auxin (GO:0009733);; Biological Process: regulation…	K13434|4.41018e-104|sot:102578223|K13434 pathogenesis-related genes transcriptional activator PTI6 | (RefSeq) pathogenesis-related genes transcriptional activator PTI6	Plant-pathogen interaction (ko04626)	--	--	AP2 domain	Pathogenesis-related genes transcriptional activator PTI6 OS=Solanum lycopersicum OX=4081 GN=PTI6 PE=2 SV=1	K	Transcription	PREDICTED: pathogenesis-related genes transcriptional activator PTI6-like [Nicotiana sylvestris]	molecular function: binding (GO:0005488);; biological process: biological regulation (GO:0065007);; molecular function: nucleic acid binding transcription factor activity (GO:0001071);; cellular component: cell (GO:0005623);; cellular component: organelle (GO:0043226);; cellular component: cell part (GO:0044464);; biological process: response to stimulus (GO:0050896)
Niben101Scf00262g05006	Niben101Scf00262g05006	45.6169	46.9011	52.4442	28.9466	34.8328	20.8888	42.1986	48.7393	34.5206	47.9703	56.7398	49.5962	0.045154	-0.42828	normal	0.046124	0.587888	normal	0.618709	-0.14957	normal	2.47e-10	-1.25225	down	0.000385	-0.60663	normal	[QV]	Secondary metabolites biosynthesis, transport and catabolism;; Defense mechanisms	Molecular Function: iron ion binding (GO:0005506);; Cellular Component: integral component of membrane (GO:0016021);; Molecular Function: trans-cinnamate 4-monooxygenase activity (GO:0016710);; Molecular Function: heme binding (GO:0020037);; Biological Process: oxidation-reduction process (GO:0055114);;	K00487|0|sot:102605644|K00487 trans-cinnamate 4-monooxygenase [EC:1.14.13.11] | (RefSeq) trans-cinnamate 4-monooxygenase	Ubiquinone and other terpenoid-quinone biosynthesis (ko00130);; Phenylalanine metabolism (ko00360);; Phenylpropanoid biosynthesis (ko00940);; Flavonoid biosynthesis (ko00941);; Stilbenoid, diarylheptanoid and gingerol biosynthesis (ko00945)	[Q]	Secondary metabolites biosynthesis, transport and catabolism	Cytochrome P450	Trans-cinnamate 4-monooxygenase OS=Catharanthus roseus OX=4058 GN=CYP73A4 PE=2 SV=1	Q	Secondary metabolites biosynthesis, transport and catabolism	PREDICTED: trans-cinnamate 4-monooxygenase [Nicotiana sylvestris]	molecular function: binding (GO:0005488);; cellular component: membrane (GO:0016020);; cellular component: membrane part (GO:0044425);; biological process: metabolic process (GO:0008152);; biological process: single-organism process (GO:0044699);; molecular function: catalytic activity (GO:0003824)
Niben101Scf00264g02002	Niben101Scf00264g02002	8.08201	4.07658	9.05092	8.12558	9.19223	6.31823	18.4861	13.3898	18.2581	4.39212	6.93589	5.16963	0.017629	0.793422	normal	0.000378	1.02815	up	0.821163	0.162748	normal	0.877088	0.074562	normal	1.07e-05	1.11818	up	--	--	--	--	--	--	--	Domain of unknown function (DUF4228)	--	S	Function unknown	PREDICTED: uncharacterized protein LOC104102697 [Nicotiana tomentosiformis]	--
Niben101Scf00264g03023	Niben101Scf00264g03023	2.47382	2.76355	5.1274	1.61729	0.648878	1.34627	1.74146	2.08894	1.19309	4.32365	3.47354	4.35787	0.008943	-0.95842	normal	0.568624	0.367768	normal	0.780855	-0.18441	normal	1.38e-07	-1.88853	down	2.07e-06	-1.37272	down	--	--	Cellular Component: chloroplast thylakoid membrane (GO:0009535);; Biological Process: photosynthesis, light harvesting (GO:0009765);; Cellular Component: integral component of membrane (GO:0016021);; Molecular Function: chlorophyll binding (GO:0016168);; Biological Process: protein-chromophore linkage (GO:0018298);;	K14172|1.97673e-65|sot:102590605|K14172 light-harvesting complex II chlorophyll a/b binding protein 7 | (RefSeq) chlorophyll a-b binding protein of LHCII type 1	Photosynthesis - antenna proteins (ko00196)	--	--	Chlorophyll A-B binding protein	Chlorophyll a-b binding protein 7, chloroplastic OS=Arabidopsis thaliana OX=3702 GN=LHCB7 PE=2 SV=1	S	Function unknown	PREDICTED: chlorophyll a-b binding protein of LHCII type 1 isoform X2 [Nicotiana sylvestris]	cellular component: cell (GO:0005623);; cellular component: membrane (GO:0016020);; cellular component: organelle (GO:0043226);; cellular component: organelle part (GO:0044422);; cellular component: cell part (GO:0044464);; biological process: metabolic process (GO:0008152);; biological process: cellular process (GO:0009987);; cellular component: membrane part (GO:0044425);; molecular function: b…
Niben101Scf00270g01015	Niben101Scf00270g01015	34.9931	43.0155	0	47.6542	46.4676	45.4206	0	0	0	0	39.0114	40.1666	--	--	--	1.43e-101	-6.45126	down	0.996109	-0.00134	normal	0.902176	0.0909	normal	--	--	--	--	--	--	--	--	--	--	--	--	--	--	--	--
Niben101Scf00270g15011	Niben101Scf00270g15011	0.02008	0.022948	1.58182	0.21556	0.083042	0.375478	3.01592	0.49108	1.38123	0.11472	4.80032	0.368528	0.735841	0.155508	normal	0.00076	1.55233	up	--	--	--	--	--	--	0.908129	-0.07106	normal	[G]	Carbohydrate transport and metabolism	Biological Process: flavonoid biosynthetic process (GO:0009813);; Cellular Component: intracellular membrane-bounded organelle (GO:0043231);; Biological Process: flavonoid glucuronidation (GO:0052696);; Molecular Function: quercetin 3-O-glucosyltransferase activity (GO:0080043);; Molecular Function: quercetin 7-O-glucosyltransferase activity (GO:0080044);;	--	--	[GC]	Carbohydrate transport and metabolism;; Energy production and conversion	UDP-glucoronosyl and UDP-glucosyl transferase	UDP-glycosyltransferase 71E1 OS=Stevia rebaudiana OX=55670 GN=UGT71E1 PE=2 SV=1	S	Function unknown	PREDICTED: anthocyanidin 3-O-glucosyltransferase 2-like [Nicotiana sylvestris]	biological process: metabolic process (GO:0008152);; cellular component: cell (GO:0005623);; cellular component: organelle (GO:0043226);; cellular component: cell part (GO:0044464);; biological process: cellular process (GO:0009987);; biological process: single-organism process (GO:0044699);; molecular function: catalytic activity (GO:0003824)
Niben101Scf00271g04024	Niben101Scf00271g04024	356.755	421.928	378.633	300.788	209.675	182.633	247.708	263.397	292.428	444.952	357.098	423.588	4.05e-08	-0.74729	normal	0.519591	0.248227	normal	0.700259	-0.14963	normal	1.47e-06	-1.18446	down	1.65e-08	-0.91878	normal	--	--	Cellular Component: chloroplast (GO:0009507);; Cellular Component: photosystem I reaction center (GO:0009538);; Biological Process: photosynthesis (GO:0015979);; Cellular Component: integral component of membrane (GO:0016021);;	K02694|5.00725e-110|sot:102585281|K02694 photosystem I subunit III | (RefSeq) photosystem I reaction center subunit III, chloroplastic-like	Photosynthesis (ko00195)	--	--	Photosystem I reaction centre subunit III	Photosystem I reaction center subunit III, chloroplastic OS=Flaveria trinervia OX=4227 GN=PSAF PE=2 SV=1	S	Function unknown	PREDICTED: photosystem I reaction center subunit III, chloroplastic-like [Nicotiana sylvestris]	cellular component: cell (GO:0005623);; cellular component: organelle (GO:0043226);; cellular component: cell part (GO:0044464);; cellular component: membrane (GO:0016020);; cellular component: macromolecular complex (GO:0032991);; cellular component: membrane part (GO:0044425);; biological process: metabolic process (GO:0008152);; biological process: cellular process (GO:0009987)
Niben101Scf00271g04029	Niben101Scf00271g04029	0.494671	0.838238	0.442739	0.8543	3.14242	1.07971	0.896305	0.669191	1.03858	0.448021	0.412992	0.56889	0.69964	0.2224	normal	0.271001	-0.60826	normal	0.899129	0.107984	normal	0.018763	1.09186	up	0.340072	0.407179	normal	[C]	Energy production and conversion	Cellular Component: integral component of membrane (GO:0016021);; Molecular Function: oxidoreductase activity, acting on CH-OH group of donors (GO:0016614);; Molecular Function: flavin adenine dinucleotide binding (GO:0050660);; Biological Process: oxidation-reduction process (GO:0055114);;	K09828|0|spen:107011042|K09828 Delta24-sterol reductase [EC:1.3.1.72 1.3.1.-] | (RefSeq) delta(24)-sterol reductase-like	Steroid biosynthesis (ko00100)	[R]	General function prediction only	FAD binding domain	Delta(24)-sterol reductase OS=Pisum sativum OX=3888 GN=DIM PE=1 SV=1	C	Energy production and conversion	PREDICTED: delta(24)-sterol reductase-like [Nicotiana attenuata]	cellular component: membrane (GO:0016020);; cellular component: membrane part (GO:0044425);; biological process: metabolic process (GO:0008152);; biological process: single-organism process (GO:0044699);; molecular function: catalytic activity (GO:0003824);; molecular function: binding (GO:0005488)
Niben101Scf00271g05016	Niben101Scf00271g05016	1.01967	1.21995	0.244885	2.58695	3.44269	5.09014	1.63397	1.93741	1.90688	0.147956	0.146672	0.600415	0.313384	0.522723	normal	0.099215	-0.73572	normal	--	--	--	8.15e-07	2.31224	up	0.003208	1.25351	up	--	--	--	--	--	--	--	Protein of unknown function (DUF640)	Protein LIGHT-DEPENDENT SHORT HYPOCOTYLS 6 OS=Arabidopsis thaliana OX=3702 GN=LSH6 PE=1 SV=1	S	Function unknown	PREDICTED: protein LIGHT-DEPENDENT SHORT HYPOCOTYLS 4-like [Nicotiana tomentosiformis]	--
Niben101Scf00271g09020	Niben101Scf00271g09020	0.614997	0.513763	0.36621	1.10777	1.50973	0.890899	1.26546	1.15856	0.97747	0.301328	0.312485	0.495315	0.019451	0.767586	normal	0.962428	0.033213	normal	0.823951	0.162033	normal	0.004612	1.0613	up	0.001336	1.03749	up	--	--	--	--	--	--	--	--	--	--	--	hypothetical protein A4A49_36978 [Nicotiana attenuata]	--
Niben101Scf00276g04016	Niben101Scf00276g04016	0.75822	0.690515	0.541954	0.772232	3.69823	0.816921	0.323263	0.524585	0.73433	0.191095	0.630961	0.266757	0.278362	-0.45008	normal	0.037087	-1.04088	down	0.320878	0.418196	normal	0.077826	1.08764	normal	0.786596	0.165063	normal	--	--	Molecular Function: nucleotide binding (GO:0000166);;	K10395|0|spen:107017633|K10395 kinesin family member 4/21/27 | (RefSeq) kinesin-like protein BC2	--	[Z]	Cytoskeleton	Kinesin motor domain	Kinesin-like protein KIN-4C OS=Arabidopsis thaliana OX=3702 GN=KIN4C PE=2 SV=2	Z	Cytoskeleton	PREDICTED: kinesin-like protein KIN-4C [Nicotiana attenuata]	molecular function: binding (GO:0005488)
Niben101Scf00279g01014	Niben101Scf00279g01014	5.12712	6.35729	8.24429	4.96063	4.09987	2.02019	1.28062	2.74698	2.49519	8.22687	6.90298	10.8523	9.23e-09	-1.5484	down	0.261187	-0.55475	normal	0.307201	-0.36343	normal	3.18e-06	-1.50509	down	1.56e-15	-2.04511	down	[G]	Carbohydrate transport and metabolism	Molecular Function: xylan 1,4-beta-xylosidase activity (GO:0009044);; Cellular Component: plant-type cell wall (GO:0009505);; Biological Process: arabinan catabolic process (GO:0031222);; Biological Process: xylan catabolic process (GO:0045493);; Molecular Function: alpha-L-arabinofuranosidase activity (GO:0046556);;	K15920|0|sot:102598234|K15920 beta-D-xylosidase 4 [EC:3.2.1.37] | (RefSeq) beta-xylosidase/alpha-L-arabinofuranosidase 2-like	Starch and sucrose metabolism (ko00500);; Amino sugar and nucleotide sugar metabolism (ko00520)	--	--	Glycosyl hydrolase family 3 C-terminal domain;; Glycosyl hydrolase family 3 N terminal domain;; Fibronectin type III-like domain	Beta-xylosidase/alpha-L-arabinofuranosidase 2 OS=Medicago sativa subsp. varia OX=36902 GN=Xyl2 PE=2 SV=1	G	Carbohydrate transport and metabolism	PREDICTED: beta-xylosidase/alpha-L-arabinofuranosidase 2-like [Nicotiana sylvestris]	molecular function: catalytic activity (GO:0003824);; cellular component: cell (GO:0005623);; cellular component: cell part (GO:0044464);; biological process: metabolic process (GO:0008152);; biological process: single-organism process (GO:0044699);; biological process: cellular process (GO:0009987)
Niben101Scf00280g01007	Niben101Scf00280g01007	4.00512	4.41431	5.78865	2.67072	2.19718	2.27063	4.81581	3.91334	1.97358	4.43575	4.50617	5.66635	0.145771	-0.53896	normal	0.225844	0.541162	normal	0.894698	-0.09136	normal	4.14e-10	-1.3951	down	0.032478	-0.68041	normal	--	--	--	K09284|0|sly:100620057|K09284 AP2-like factor, euAP2 lineage | (RefSeq) AP2b, SlAP2b; AP2 transcription factor SlAP2b	--	--	--	AP2 domain	Floral homeotic protein APETALA 2 OS=Arabidopsis thaliana OX=3702 GN=AP2 PE=1 SV=1	K	Transcription	PREDICTED: floral homeotic protein APETALA 2-like isoform X2 [Nicotiana attenuata]	--
Niben101Scf00282g02006	Niben101Scf00282g02006	13.3147	7.02869	15.7357	4.17465	8.99486	3.80209	102.861	47.4205	43.1821	6.08196	6.3151	6.74548	0.001521	1.25542	up	1.01e-17	2.80523	up	0.072726	0.56269	normal	0.128119	-0.57023	normal	1.2e-22	2.57	up	--	--	Molecular Function: DNA binding (GO:0003677);; Molecular Function: transcription factor activity, sequence-specific DNA binding (GO:0003700);; Cellular Component: nucleus (GO:0005634);; Biological Process: regulation of transcription, DNA-templated (GO:0006355);;	K09286|5.39949e-98|sot:102577707|K09286 EREBP-like factor | (RefSeq) CBF3; AP2 domain CBF protein	--	--	--	AP2 domain	Dehydration-responsive element-binding protein 1B OS=Arabidopsis thaliana OX=3702 GN=DREB1B PE=1 SV=2	K	Transcription	PREDICTED: dehydration-responsive element-binding protein 1A-like [Nicotiana attenuata]	molecular function: binding (GO:0005488);; biological process: biological regulation (GO:0065007);; molecular function: nucleic acid binding transcription factor activity (GO:0001071);; cellular component: cell (GO:0005623);; cellular component: organelle (GO:0043226);; cellular component: cell part (GO:0044464)
Niben101Scf00282g02013	Niben101Scf00282g02013	10.6249	9.95312	10.985	6.27518	6.04107	6.20313	8.77454	7.58171	7.14141	12.1727	10.1933	12.3786	0.000106	-0.6411	normal	0.079903	0.395063	normal	0.576355	-0.19417	normal	9.37e-13	-1.30545	down	1.65e-06	-0.86449	normal	[V]	Defense mechanisms	Cellular Component: chloroplast (GO:0009507);;	--	--	--	--	--	ABC transporter B family member 28 OS=Arabidopsis thaliana OX=3702 GN=ABCB28 PE=2 SV=1	S	Function unknown	PREDICTED: uncharacterized protein LOC104235342 [Nicotiana sylvestris]	cellular component: cell (GO:0005623);; cellular component: organelle (GO:0043226);; cellular component: cell part (GO:0044464)
Niben101Scf00286g05014	Niben101Scf00286g05014	3.97215	6.05903	4.04496	8.64543	17.1283	10.0084	4.09771	4.75459	5.76523	2.75331	3.66338	2.0509	0.669789	-0.1701	normal	0.000163	-1.07072	down	0.110909	0.4881	normal	1.46e-08	1.53047	up	0.135952	0.416182	normal	[G]	Carbohydrate transport and metabolism	Molecular Function: beta-glucosidase activity (GO:0008422);; Biological Process: glucan catabolic process (GO:0009251);;	K05349|0|sot:102587222|K05349 beta-glucosidase [EC:3.2.1.21] | (RefSeq) beta-glucosidase BoGH3B-like	Cyanoamino acid metabolism (ko00460);; Starch and sucrose metabolism (ko00500);; Phenylpropanoid biosynthesis (ko00940)	--	--	Glycosyl hydrolase family 3 N terminal domain;; Glycosyl hydrolase family 3 C-terminal domain	Beta-xylosidase/alpha-L-arabinofuranosidase 2 OS=Medicago sativa subsp. varia OX=36902 GN=Xyl2 PE=2 SV=1	G	Carbohydrate transport and metabolism	PREDICTED: uncharacterized protein LOC109205647 [Nicotiana attenuata]	molecular function: catalytic activity (GO:0003824);; biological process: metabolic process (GO:0008152)
Niben101Scf00288g18012	Niben101Scf00288g18012	0.836805	0.669123	0.31396	0.543963	2.01099	0.800407	0.456475	0.445353	0.98153	0.159328	0.3017	0.223231	0.873992	-0.11704	normal	0.445343	-0.4802	normal	--	--	--	0.002688	1.43094	up	0.084998	0.766863	normal	--		Molecular Function: non-membrane spanning protein tyrosine kinase activity (GO:0004715);; Molecular Function: ATP binding (GO:0005524);; Biological Process: peptidyl-tyrosine phosphorylation (GO:0018108);;	--	--	[T]	Signal transduction mechanisms	Protein tyrosine kinase;; Protein kinase domain	Serine/threonine-protein kinase STY17 OS=Arabidopsis thaliana OX=3702 GN=STY17 PE=1 SV=1	T	Signal transduction mechanisms	PREDICTED: probable LIM domain-containing serine/threonine-protein kinase DDB_G0287001 [Nicotiana attenuata]	biological process: metabolic process (GO:0008152);; biological process: cellular process (GO:0009987);; molecular function: catalytic activity (GO:0003824);; molecular function: binding (GO:0005488)
Niben101Scf00288g18013	Niben101Scf00288g18013	10.5348	2.78442	2.1237	6.7235	6.49375	22.3452	9.82828	14.1596	6.90381	3.21876	3.50747	1.7482	0.581799	0.335056	normal	0.923027	-0.08756	normal	0.771869	0.155583	normal	0.002017	1.35149	up	3.53e-05	1.27059	up	[E]	Amino acid transport and metabolism	Cellular Component: mitochondrion (GO:0005739);; Molecular Function: alanine-glyoxylate transaminase activity (GO:0008453);; Molecular Function: pyridoxal phosphate binding (GO:0030170);; Molecular Function: identical protein binding (GO:0042802);;	K00827|5.63505e-115|pop:POPTR_0016s13970g|K00827 alanine-glyoxylate transaminase / (R)-3-amino-2-methylpropionate-pyruvate transaminase [EC:2.6.1.44 2.6.1.40] | (RefSeq) POPTRDRAFT_835604; alanine:glyoxylate aminotransferase 3 family protein	Alanine, aspartate and glutamate metabolism (ko00250);; Glycine, serine and threonine metabolism (ko00260);; Cysteine and methionine metabolism (ko00270);; Valine, leucine and isoleucine degradation (ko00280)	[E]	Amino acid transport and metabolism	Aminotransferase class-III	Alanine--glyoxylate aminotransferase 2 homolog 3, mitochondrial OS=Arabidopsis thaliana OX=3702 GN=At3g08860 PE=2 SV=1	E	Amino acid transport and metabolism	PREDICTED: alanine--glyoxylate aminotransferase 2 homolog 3, mitochondrial-like isoform X1 [Nicotiana sylvestris]	cellular component: cell (GO:0005623);; cellular component: organelle (GO:0043226);; cellular component: cell part (GO:0044464);; molecular function: catalytic activity (GO:0003824);; molecular function: binding (GO:0005488)
Niben101Scf00290g00017	Niben101Scf00290g00017	1080.06	1233.12	1079.05	859.884	587.911	463.24	622.689	659.959	694.116	1304.57	1095.94	1215.22	1.06e-16	-0.99582	normal	0.859783	0.095338	normal	0.637651	-0.15968	normal	9.08e-07	-1.26587	down	1.08e-15	-1.1751	down	--	--	Cellular Component: chloroplast (GO:0009507);; Cellular Component: photosynthetic membrane (GO:0034357);;	--	--	--	--	--	Photosystem II 5 kDa protein, chloroplastic OS=Petunia hybrida OX=4102 PE=1 SV=1	S	Function unknown	PREDICTED: photosystem II 5 kDa protein, chloroplastic-like [Nicotiana sylvestris]	cellular component: cell (GO:0005623);; cellular component: organelle (GO:0043226);; cellular component: cell part (GO:0044464);; cellular component: membrane (GO:0016020)
Niben101Scf00293g04005	Niben101Scf00293g04005	0.754259	0.698206	0.460883	1.20699	3.71436	1.26882	0.977782	0.850238	1.21683	0.410641	0.682065	0.491164	0.333497	0.361036	normal	0.141056	-0.70585	normal	0.869764	0.125632	normal	0.001058	1.29879	up	0.085455	0.53379	normal	[S]	Function unknown	--	K20093|0|sot:102599573|K20093 DNA excision repair protein ERCC-6-like [EC:3.6.4.12] | (RefSeq) protein CHROMATIN REMODELING 24	--	[KL]	Transcription;; Replication, recombination and repair	SNF2 family N-terminal domain;; Helicase conserved C-terminal domain;; Type III restriction enzyme, res subunit	Protein CHROMATIN REMODELING 24 OS=Arabidopsis thaliana OX=3702 GN=CHR24 PE=2 SV=1	L	Replication, recombination and repair	PREDICTED: protein CHROMATIN REMODELING 24 isoform X2 [Nicotiana tomentosiformis]	--
Niben101Scf00294g02016	Niben101Scf00294g02016	0.26821	0.175676	0.09445	0.444632	1.59562	0.545989	0.49977	0.613156	0.333454	0.193416	0.216651	0.191437	0.086183	0.756843	normal	0.436461	-0.4822	normal	--	--	--	0.006814	1.28915	up	0.101628	0.692817	normal	--	--	Molecular Function: phosphoprotein binding (GO:0051219);;	--	--	--	--	--	Interactor of constitutive active ROPs 2, chloroplastic OS=Arabidopsis thaliana OX=3702 GN=ICR2 PE=1 SV=1	S	Function unknown	PREDICTED: interactor of constitutive active ROPs 2, chloroplastic-like isoform X1 [Nicotiana sylvestris]	molecular function: binding (GO:0005488)
Niben101Scf00298g02018	Niben101Scf00298g02018	54.4567	58.5009	60.443	42.1619	28.6131	25.0752	42.0208	41.4705	41.0612	65.1611	63.2139	65.5451	1.1e-07	-0.7022	normal	0.250519	0.397082	normal	0.370908	-0.22014	normal	8.4e-09	-1.36552	down	4.98e-14	-0.95598	normal	--	--	Biological Process: response to light stimulus (GO:0009416);; Cellular Component: photosystem I (GO:0009522);; Cellular Component: chloroplast thylakoid membrane (GO:0009535);; Biological Process: photosynthesis, light harvesting in photosystem I (GO:0009768);; Cellular Component: chloroplast envelope (GO:0009941);; Cellular Component: plastoglobule (GO:0010287);; Cellular Component: integral com…	K08908|4.17019e-139|spen:107007462|K08908 light-harvesting complex I chlorophyll a/b binding protein 2 | (RefSeq) chlorophyll a-b binding protein, chloroplastic	Photosynthesis - antenna proteins (ko00196)	--	--	Chlorophyll A-B binding protein	Photosystem I chlorophyll a/b-binding protein 6, chloroplastic OS=Arabidopsis thaliana OX=3702 GN=LHCA6 PE=1 SV=1	S	Function unknown	PREDICTED: photosystem I chlorophyll a/b-binding protein 6, chloroplastic [Nicotiana attenuata]	biological process: response to stimulus (GO:0050896);; cellular component: cell (GO:0005623);; cellular component: membrane (GO:0016020);; cellular component: macromolecular complex (GO:0032991);; cellular component: membrane part (GO:0044425);; cellular component: cell part (GO:0044464);; cellular component: organelle (GO:0043226);; cellular component: organelle part (GO:0044422);; biological p…
Niben101Scf00302g03028	Niben101Scf00302g03028	0.467728	0.360141	0.391826	0.965064	2.69576	1.16534	0.969905	1.38212	0.817537	0.151783	0.336272	0.41469	0.009606	0.884809	normal	0.508448	-0.3861	normal	0.837206	0.151612	normal	0.00017	1.61134	up	0.001958	1.12284	up	[E]	Amino acid transport and metabolism	Cellular Component: mitochondrion (GO:0005739);; Molecular Function: alanine-glyoxylate transaminase activity (GO:0008453);; Molecular Function: pyridoxal phosphate binding (GO:0030170);; Molecular Function: identical protein binding (GO:0042802);;	K00827|0|sot:102589300|K00827 alanine-glyoxylate transaminase / (R)-3-amino-2-methylpropionate-pyruvate transaminase [EC:2.6.1.44 2.6.1.40] | (RefSeq) alanine--glyoxylate aminotransferase 2 homolog 2, mitochondrial	Alanine, aspartate and glutamate metabolism (ko00250);; Glycine, serine and threonine metabolism (ko00260);; Cysteine and methionine metabolism (ko00270);; Valine, leucine and isoleucine degradation (ko00280)	[E]	Amino acid transport and metabolism	Aminotransferase class-III;; WD domain, G-beta repeat	Alanine--glyoxylate aminotransferase 2 homolog 3, mitochondrial OS=Arabidopsis thaliana OX=3702 GN=At3g08860 PE=2 SV=1	E	Amino acid transport and metabolism	PREDICTED: alanine--glyoxylate aminotransferase 2 homolog 3, mitochondrial-like [Nicotiana attenuata]	cellular component: cell (GO:0005623);; cellular component: organelle (GO:0043226);; cellular component: cell part (GO:0044464);; molecular function: catalytic activity (GO:0003824);; molecular function: binding (GO:0005488)
Niben101Scf00306g01009	Niben101Scf00306g01009	30.9961	30.2527	31.38	21.972	15.6779	19.0476	24.4873	27.535	20.0964	31.0014	30.7293	34.5363	0.002227	-0.57214	normal	0.247449	0.378798	normal	0.747768	-0.12293	normal	4.24e-08	-1.14375	down	7.82e-05	-0.72002	normal	--	--	Cellular Component: chloroplast thylakoid membrane (GO:0009535);; Cellular Component: integral component of membrane (GO:0016021);;	--	--	--	--	--	--	S	Function unknown	PREDICTED: uncharacterized protein LOC109229195 [Nicotiana attenuata]	cellular component: cell (GO:0005623);; cellular component: membrane (GO:0016020);; cellular component: organelle (GO:0043226);; cellular component: organelle part (GO:0044422);; cellular component: cell part (GO:0044464);; cellular component: membrane part (GO:0044425)
Niben101Scf00307g03011	Niben101Scf00307g03011	25.2982	23.7882	30.9115	11.656	10.5431	12.8616	13.8838	15.8506	12.5574	17.0932	19.5777	12.8409	3.09e-10	-1.09773	down	0.200934	0.323786	normal	0.013344	0.530278	normal	3.4e-06	-0.89205	normal	0.006228	-0.53235	normal	--	--	Molecular Function: zinc ion binding (GO:0008270);;	K16276|0|sot:102582364|K16276 zinc finger protein-like protein | (RefSeq) uncharacterized LOC102582364	--	[R]	General function prediction only	Hemerythrin HHE cation binding domain;; Zinc-ribbon;; CHY zinc finger	Zinc finger protein BRUTUS OS=Arabidopsis thaliana OX=3702 GN=BTS PE=1 SV=1	S	Function unknown	PREDICTED: uncharacterized protein LOC104218266 isoform X1 [Nicotiana sylvestris]	molecular function: binding (GO:0005488)
Niben101Scf00308g01002	Niben101Scf00308g01002	1.70605	4.76806	0.929774	5.13839	7.51711	5.85549	1.50159	1.19379	2.28088	0.670962	0.935589	0.621433	0.287487	-0.52555	normal	2.44e-09	-1.599	down	0.288509	0.371762	normal	1.06e-26	2.46581	up	0.052822	0.675621	normal	--	--	Cellular Component: cytoplasm (GO:0005737);; Biological Process: metal ion transport (GO:0030001);; Molecular Function: transition metal ion binding (GO:0046914);; Biological Process: cellular transition metal ion homeostasis (GO:0046916);;	--	--	[P]	Inorganic ion transport and metabolism	Heavy-metal-associated domain	Heavy metal-associated isoprenylated plant protein 9 OS=Arabidopsis thaliana OX=3702 GN=HIPP09 PE=2 SV=1	S	Function unknown	PREDICTED: heavy metal-associated isoprenylated plant protein 3 [Nicotiana tomentosiformis]	cellular component: cell (GO:0005623);; cellular component: cell part (GO:0044464);; biological process: localization (GO:0051179);; molecular function: binding (GO:0005488);; biological process: cellular process (GO:0009987);; biological process: single-organism process (GO:0044699);; biological process: biological regulation (GO:0065007)
Niben101Scf00308g01003	Niben101Scf00308g01003	16.6198	11.4615	14.8618	13.9243	16.2888	16.1045	42.4218	29.7024	28.1684	12.3731	12.9377	12.8377	4.23e-05	0.891023	normal	1.08e-07	1.11354	up	0.887323	0.079706	normal	0.360372	-0.15428	normal	5.66e-08	0.993668	normal	--	--	Molecular Function: DNA binding (GO:0003677);; Cellular Component: nucleus (GO:0005634);; Biological Process: regulation of transcription, DNA-templated (GO:0006355);; Cellular Component: integral component of membrane (GO:0016021);;	--	--	--	--	No apical meristem (NAM) protein	NAC domain-containing protein 62 OS=Arabidopsis thaliana OX=3702 GN=NAC062 PE=1 SV=1	S	Function unknown	putative membrane bound NAC transcription factor 1 [Nicotiana benthamiana]	molecular function: binding (GO:0005488);; cellular component: cell (GO:0005623);; cellular component: organelle (GO:0043226);; cellular component: cell part (GO:0044464);; biological process: biological regulation (GO:0065007);; cellular component: membrane (GO:0016020);; cellular component: membrane part (GO:0044425)
Niben101Scf00308g01005	Niben101Scf00308g01005	23.076	23.2512	28.3937	19.3072	15.4532	16.9953	31.2823	28.2126	17.8645	28.1092	28.9142	32.1855	0.645826	-0.17854	normal	0.065991	0.585403	normal	0.248347	-0.29409	normal	7.74e-11	-1.17763	down	0.038371	-0.50553	normal	--	--	Molecular Function: calcium ion binding (GO:0005509);;	--	--	[K]	Transcription	Endonuclease/Exonuclease/phosphatase family	Uncharacterized calcium-binding protein At1g02270 OS=Arabidopsis thaliana OX=3702 GN=At1g02270 PE=2 SV=2	S	Function unknown	PREDICTED: uncharacterized calcium-binding protein At1g02270 isoform X2 [Nicotiana sylvestris]	molecular function: binding (GO:0005488)
Niben101Scf00309g02001	Niben101Scf00309g02001	0.47904	1.14897	0.25221	0.995741	1.34178	1.15629	0.133791	0.195666	0.352879	0.031904	0.185374	0.168399	0.033867	-0.921	normal	6.86e-07	-1.74928	down	--	--	--	1.47e-08	2.26424	up	--	--	--	--	--	--	--	--	--	--	IQ calmodulin-binding motif;; Protein of unknown function (DUF4005);; Protein of unknown function (DUF3306)	Protein IQ-DOMAIN 31 OS=Arabidopsis thaliana OX=3702 GN=IQD31 PE=1 SV=1	S	Function unknown	PREDICTED: protein IQ-DOMAIN 14-like [Nicotiana tabacum]	--
Niben101Scf00311g02004	Niben101Scf00311g02004	1.32105	2.45576	2.25168	1.88145	1.89766	1.65511	0.728059	0.654278	0.647464	1.18422	1.91219	1.76439	2.39e-05	-1.37216	down	0.001396	-1.11321	down	0.853855	0.13982	normal	0.527648	-0.24896	normal	3.81e-05	-1.29812	down	[M]	Cell wall/membrane/envelope biogenesis	Molecular Function: protein serine/threonine kinase activity (GO:0004674);; Molecular Function: ATP binding (GO:0005524);; Biological Process: protein phosphorylation (GO:0006468);; Cellular Component: membrane (GO:0016020);;	--	--	[T]	Signal transduction mechanisms	Protein kinase domain;; Protein tyrosine kinase	Mitogen-activated protein kinase kinase kinase 18 OS=Arabidopsis thaliana OX=3702 GN=MAPKKK18 PE=1 SV=1	T	Signal transduction mechanisms	PREDICTED: mitogen-activated protein kinase kinase kinase 2-like [Nicotiana tabacum]	biological process: metabolic process (GO:0008152);; biological process: cellular process (GO:0009987);; molecular function: catalytic activity (GO:0003824);; molecular function: binding (GO:0005488);; cellular component: membrane (GO:0016020)
Niben101Scf00313g04006	Niben101Scf00313g04006	0.515855	0.646246	0.878706	0.740996	0.673943	0.417022	0.414732	0.455144	0.286159	0.719877	0.776808	0.894313	--	--	--	--	--	--	0.830095	-0.15823	normal	0.098415	-0.71479	normal	0.003856	-1.06534	down	--	--	--	K14790|5.61575e-79|cit:102619433|K14790 nucleolar protein 9 | (RefSeq) pumilio homolog 23	--	[J]	Translation, ribosomal structure and biogenesis	Vacuolar protein sorting-associated protein 35	Pumilio homolog 23 OS=Arabidopsis thaliana OX=3702 GN=APUM23 PE=1 SV=1	J	Translation, ribosomal structure and biogenesis	PREDICTED: pumilio homolog 23-like isoform X1 [Nicotiana sylvestris]	--
Niben101Scf00317g00008	Niben101Scf00317g00008	3.19831	3.26392	3.97595	14.7331	17.3871	20.5677	6.41409	11.4738	13.638	2.90233	3.50981	2.70333	0.000592	1.07692	up	0.135797	-0.57498	normal	0.940078	0.069467	normal	1.32e-16	1.97493	up	5.72e-05	1.21215	up	--	--	Cellular Component: integral component of membrane (GO:0016021);;	--	--	--	--	--	--	S	Function unknown	PREDICTED: uncharacterized protein LOC104099555 isoform X1 [Nicotiana tomentosiformis]	cellular component: membrane (GO:0016020);; cellular component: membrane part (GO:0044425)
Niben101Scf00317g01004	Niben101Scf00317g01004	1.43403	2.10525	0.949926	3.12717	5.2578	3.33983	1.78372	2.64405	2.32691	1.55466	1.36351	1.06816	0.575687	0.278042	normal	0.094887	-0.61658	normal	0.962641	0.047353	normal	0.000905	1.02151	up	0.33918	0.361447	normal	--	--	--	--	--	--	--	Auxin canalisation;; Plant pleckstrin homology-like region	--	S	Function unknown	PREDICTED: VAN3-binding protein [Nicotiana attenuata]	--
Niben101Scf00317g07014	Niben101Scf00317g07014	2.43048	1.12844	2.41529	1.02223	0.619289	1.18608	3.04561	2.35896	1.24513	2.70535	4.08419	4.42671	0.919532	-0.07149	normal	0.019855	0.995352	normal	0.033941	-0.63462	normal	1.01e-13	-2.19553	down	0.003448	-0.91628	normal	[M]	Cell wall/membrane/envelope biogenesis	Biological Process: protein glycosylation (GO:0006486);; Cellular Component: integral component of membrane (GO:0016021);; Molecular Function: transferase activity, transferring glycosyl groups (GO:0016757);;	--	--	[G]	Carbohydrate transport and metabolism	--	Putative glucuronosyltransferase PGSIP8 OS=Arabidopsis thaliana OX=3702 GN=PGSIP8 PE=2 SV=1	O	Posttranslational modification, protein turnover, chaperones	PREDICTED: putative glucuronosyltransferase PGSIP8 [Nicotiana attenuata]	biological process: metabolic process (GO:0008152);; biological process: cellular process (GO:0009987);; biological process: single-organism process (GO:0044699);; cellular component: membrane (GO:0016020);; cellular component: membrane part (GO:0044425);; molecular function: catalytic activity (GO:0003824)
Niben101Scf00317g08002	Niben101Scf00317g08002	0.659113	0.660633	0.321318	1.31134	1.30883	1.27771	0.161649	0.46138	0.996794	0.338174	0.319966	0.468686	0.862845	-0.13217	normal	0.158509	-0.76773	normal	--	--	--	0.002546	1.15647	up	--	--	--	--	--	--	--	--	[I]	Lipid transport and metabolism	CRAL/TRIO domain	Phosphatidylinositol/phosphatidylcholine transfer protein SFH11 OS=Arabidopsis thaliana OX=3702 GN=SFH11 PE=3 SV=1	S	Function unknown	PREDICTED: phosphatidylinositol/phosphatidylcholine transfer protein SFH11 isoform X1 [Nicotiana attenuata]	--
Niben101Scf00317g09001	Niben101Scf00317g09001	4.61712	3.5174	3.99295	3.33894	3.00119	4.09293	10.1493	9.0956	10.8017	4.89972	3.38594	3.62492	1.25e-08	0.996681	normal	1.32e-14	1.49079	up	0.954985	-0.04722	normal	0.04066	-0.59112	normal	2.24e-05	0.909561	normal	[O]	Posttranslational modification, protein turnover, chaperones	--	K13993|2.50016e-84|spen:107027125|K13993 HSP20 family protein | (RefSeq) small heat shock protein, chloroplastic-like	Protein processing in endoplasmic reticulum (ko04141)	[O]	Posttranslational modification, protein turnover, chaperones	Hsp20/alpha crystallin family	Small heat shock protein, chloroplastic OS=Oxybasis rubra OX=3560 GN=HSP23 PE=2 SV=1	O	Posttranslational modification, protein turnover, chaperones	PREDICTED: small heat shock protein, chloroplastic-like [Nicotiana attenuata]	--
Niben101Scf00318g03014	Niben101Scf00318g03014	2.22258	2.88317	3.31455	1.39915	1.13837	1.10778	3.97868	2.10716	2.78551	2.85968	3.80246	2.52439	0.77048	-0.15032	normal	0.000328	1.15457	up	0.810981	-0.14688	normal	1.27e-11	-1.65646	down	0.305281	-0.34228	normal	--		Molecular Function: nucleotide binding (GO:0000166);; Molecular Function: protein kinase activity (GO:0004672);; Biological Process: phosphorylation (GO:0016310);;	--	--	[T]	Signal transduction mechanisms	Protein kinase domain;; Protein tyrosine kinase;; Regulator of chromosome condensation (RCC1) repeat	Putative serine/threonine-protein kinase-like protein CCR3 OS=Arabidopsis thaliana OX=3702 GN=CCR3 PE=2 SV=1	T	Signal transduction mechanisms	PREDICTED: putative serine/threonine-protein kinase-like protein CCR3 [Solanum tuberosum]	molecular function: binding (GO:0005488);; biological process: metabolic process (GO:0008152);; biological process: cellular process (GO:0009987);; molecular function: catalytic activity (GO:0003824)
Niben101Scf00318g09010	Niben101Scf00318g09010	1.11107	0.498734	1.03668	0.41038	0.411624	0.23628	0.629685	0.821028	0.357798	0.981158	0.863674	0.743599	0.304631	-0.51397	normal	--	--	--	0.990061	-0.01694	normal	0.001087	-1.41496	down	0.155231	-0.62781	normal	[Q]	Secondary metabolites biosynthesis, transport and catabolism	Molecular Function: metal ion binding (GO:0046872);; Molecular Function: dioxygenase activity (GO:0051213);;	--	--	[QR]	Secondary metabolites biosynthesis, transport and catabolism;; General function prediction only	non-haem dioxygenase in morphine synthesis N-terminal;; 2OG-Fe(II) oxygenase superfamily	Probable 2-oxoglutarate-dependent dioxygenase At5g05600 OS=Arabidopsis thaliana OX=3702 GN=At5g05600 PE=2 SV=1	S	Function unknown	PREDICTED: protein DOWNY MILDEW RESISTANCE 6-like [Nicotiana attenuata]	molecular function: binding (GO:0005488);; biological process: metabolic process (GO:0008152);; biological process: single-organism process (GO:0044699);; molecular function: catalytic activity (GO:0003824)
Niben101Scf00318g10005	Niben101Scf00318g10005	111.319	124.223	119.612	91.102	63.5765	63.9294	100.77	91.0096	93.59	139.204	124.11	138.738	3.71e-05	-0.54649	normal	0.159849	0.413535	normal	0.340349	-0.23775	normal	1.12e-08	-1.24976	down	1.36e-08	-0.81382	normal	[I]	Lipid transport and metabolism	Biological Process: unsaturated fatty acid biosynthetic process (GO:0006636);; Cellular Component: integral component of membrane (GO:0016021);; Molecular Function: oxidoreductase activity, acting on paired donors, with oxidation of a pair of donors resulting in the reduction of molecular oxygen to two molecules of water (GO:0016717);; Cellular Component: chloroplast membrane (GO:0031969);; Biolo…	K10257|0|sot:102597672|K10257 acyl-lipid omega-3 desaturase [EC:1.14.19.25 1.14.19.35 1.14.19.36] | (RefSeq) omega-3 fatty acid desaturase, chloroplastic-like	--	--	--	Domain of unknown function (DUF3474);; Fatty acid desaturase	Omega-3 fatty acid desaturase, chloroplastic OS=Sesamum indicum OX=4182 GN=FAD7 PE=2 SV=1	I	Lipid transport and metabolism	PREDICTED: omega-3 fatty acid desaturase, chloroplastic [Nicotiana attenuata]	biological process: metabolic process (GO:0008152);; biological process: cellular process (GO:0009987);; biological process: single-organism process (GO:0044699);; cellular component: membrane (GO:0016020);; cellular component: membrane part (GO:0044425);; molecular function: catalytic activity (GO:0003824);; cellular component: cell (GO:0005623);; cellular component: organelle (GO:0043226);; cel…
Niben101Scf00321g04010	Niben101Scf00321g04010	42.9601	51.0368	45.8721	36.1456	28.4121	29.4542	34.741	33.8825	40.6726	51.008	43.5012	51.0876	0.000126	-0.58078	normal	0.354874	0.265014	normal	0.757834	-0.1268	normal	3.66e-07	-1.02565	down	7.56e-06	-0.7321	normal	[R]	General function prediction only	Cellular Component: chloroplast thylakoid membrane (GO:0009535);; Cellular Component: chloroplast envelope (GO:0009941);;	--	--	[G]	Carbohydrate transport and metabolism	NAD(P)H-binding;; NmrA-like family;; 3-beta hydroxysteroid dehydrogenase/isomerase family;; NAD dependent epimerase/dehydratase family	Protein TIC 62, chloroplastic OS=Pisum sativum OX=3888 GN=TIC62 PE=1 SV=2	GM	Carbohydrate transport and metabolism;; Cell wall/membrane/envelope biogenesis	PREDICTED: protein TIC 62, chloroplastic isoform X1 [Nicotiana sylvestris]	cellular component: cell (GO:0005623);; cellular component: membrane (GO:0016020);; cellular component: organelle (GO:0043226);; cellular component: organelle part (GO:0044422);; cellular component: cell part (GO:0044464)
Niben101Scf00321g05001	Niben101Scf00321g05001	3.88828	2.60944	2.46474	5.17031	7.41405	10.016	6.08266	5.56757	6.09477	2.06739	2.90872	1.72392	0.001525	0.684531	normal	0.538672	-0.24403	normal	0.543684	0.262495	normal	1.69e-06	1.24503	up	1.08e-07	1.00911	up	--	--	--	--	--	--	--	Cytosine specific DNA methyltransferase replication foci domain	Protein ENHANCED DOWNY MILDEW 2 OS=Arabidopsis thaliana OX=3702 GN=EDM2 PE=1 SV=1	--	--	PREDICTED: uncharacterized protein LOC104242669 isoform X1 [Nicotiana sylvestris]	--
Niben101Scf00324g02027	Niben101Scf00324g02027	1.13922	0.873343	0.943684	0.610667	0.801135	0.700349	1.20568	0.862922	1.36547	0.747536	1.36662	1.66398	0.973521	-0.02334	normal	0.121622	0.64688	normal	0.66121	-0.24912	normal	0.002125	-1.12994	down	0.355941	-0.38962	normal	--	--	Molecular Function: hydrolase activity (GO:0016787);;	--	--	--	--	--	GDSL esterase/lipase At5g08460 OS=Arabidopsis thaliana OX=3702 GN=At5g08460 PE=2 SV=1	S	Function unknown	PREDICTED: GDSL esterase/lipase At5g08460-like [Nicotiana attenuata]	molecular function: catalytic activity (GO:0003824)
Niben101Scf00327g00001	Niben101Scf00327g00001	1.19622	1.13949	0.34164	2.32976	2.60699	2.16134	1.40963	1.18191	2.04557	0.424718	0.755194	0.7268	--	--	--	0.476776	-0.39684	normal	--	--	--	0.007136	1.18786	up	--	--	--	[M]	Cell wall/membrane/envelope biogenesis	Molecular Function: catalytic activity (GO:0003824);; Molecular Function: coenzyme binding (GO:0050662);;	--	--	[V]	Defense mechanisms	--	Putative anthocyanidin reductase OS=Ginkgo biloba OX=3311 PE=2 SV=1	M	Cell wall/membrane/envelope biogenesis	PREDICTED: cinnamoyl-CoA reductase 1-like [Nicotiana tomentosiformis]	molecular function: catalytic activity (GO:0003824);; molecular function: binding (GO:0005488)
Niben101Scf00327g00011	Niben101Scf00327g00011	34.7897	19.85	26.5659	13.4164	14.3528	17.6042	42.597	27.2854	31.8665	29.644	30.0835	43.6716	0.880841	0.072207	normal	2.85e-07	1.14728	up	0.331903	-0.34015	normal	1.85e-13	-1.56217	down	0.22428	-0.34084	normal	[EH]	Amino acid transport and metabolism;; Coenzyme transport and metabolism	Cellular Component: cell (GO:0005623);; Molecular Function: oxidoreductase activity, acting on a sulfur group of donors, disulfide as acceptor (GO:0016671);; Biological Process: sulfate reduction (GO:0019419);; Biological Process: cell redox homeostasis (GO:0045454);;	K05907|3.42739e-70|sot:102579112|K05907 adenylyl-sulfate reductase (glutathione) [EC:1.8.4.9] | (RefSeq) 5'-adenylylsulfate reductase 3, chloroplastic-like	Sulfur metabolism (ko00920)	[E]	Amino acid transport and metabolism	Phosphoadenosine phosphosulfate reductase family	5&apos;-adenylylsulfate reductase 1, chloroplastic OS=Arabidopsis thaliana OX=3702 GN=APR1 PE=1 SV=2	P	Inorganic ion transport and metabolism	PREDICTED: 5&apos;-adenylylsulfate reductase 3, chloroplastic-like isoform X2 [Nicotiana sylvestris]	cellular component: cell (GO:0005623);; biological process: metabolic process (GO:0008152);; biological process: single-organism process (GO:0044699);; molecular function: catalytic activity (GO:0003824);; biological process: cellular process (GO:0009987);; biological process: biological regulation (GO:0065007)
Niben101Scf00332g04003	Niben101Scf00332g04003	3.14099	3.68808	2.96476	7.46637	10.7107	7.52681	2.32965	3.67696	4.97198	2.10276	2.47742	2.7984	0.905332	-0.06986	normal	0.002016	-0.99577	normal	0.604322	0.243046	normal	1.71e-08	1.292	up	0.654821	0.195865	normal	--	--	--	--	--	--	--	Protein of unknown function (DUF1645)	--	S	Function unknown	PREDICTED: uncharacterized protein LOC104210359 [Nicotiana sylvestris]	--
Niben101Scf00332g09009	Niben101Scf00332g09009	17.3247	8.20542	16.9584	4.07182	4.13401	6.19218	28.7992	24.429	11.2615	17.7497	22.7345	28.6818	0.753522	0.216041	normal	5.13e-09	1.85021	up	0.404236	-0.37428	normal	2.2e-28	-2.55531	down	0.560575	-0.31436	normal	[O]	Posttranslational modification, protein turnover, chaperones	Biological Process: ferrous iron transport (GO:0015684);; Molecular Function: nicotianamine synthase activity (GO:0030410);; Biological Process: nicotianamine biosynthetic process (GO:0030418);;	K05953|0|sot:102578513|K05953 nicotianamine synthase [EC:2.5.1.43] | (RefSeq) nicotianamine synthase	--	--	--	Nicotianamine synthase protein	Nicotianamine synthase OS=Solanum lycopersicum OX=4081 GN=CHLN PE=2 SV=1	E	Amino acid transport and metabolism	PREDICTED: nicotianamine synthase [Nicotiana attenuata]	biological process: localization (GO:0051179);; molecular function: catalytic activity (GO:0003824);; biological process: metabolic process (GO:0008152);; biological process: cellular process (GO:0009987);; biological process: single-organism process (GO:0044699)
Niben101Scf00337g03002	Niben101Scf00337g03002	3.13837	3.09822	1.762	5.09384	7.95205	5.00508	2.76455	3.47892	3.88477	2.13826	2.32254	1.86029	0.875482	0.08403	normal	0.029051	-0.67636	normal	0.775524	0.176347	normal	5.56e-05	1.00987	up	0.31315	0.306339	normal	--	--	Biological Process: response to stress (GO:0006950);; Biological Process: cellular process (GO:0009987);; Biological Process: single-organism process (GO:0044699);;	--	--	--	--	--	Protein MICROTUBULE BINDING PROTEIN 2C OS=Nicotiana tabacum OX=4097 GN=MBP2C PE=1 SV=1	S	Function unknown	MPB2C-like protein [Nicotiana benthamiana]	biological process: response to stimulus (GO:0050896);; biological process: cellular process (GO:0009987);; biological process: single-organism process (GO:0044699)
Niben101Scf00337g07012	Niben101Scf00337g07012	47.7096	52.1537	54.3174	38.3328	32.6933	24.11	30.3043	35.0391	37.0961	53.0753	51.8067	57.8622	1.05e-07	-0.8028	normal	0.709216	0.156848	normal	0.68696	-0.14258	normal	1.68e-07	-1.15198	down	3.54e-11	-0.97605	normal	--	--	Molecular Function: calcium ion binding (GO:0005509);; Cellular Component: chloroplast (GO:0009507);; Cellular Component: photosystem II oxygen evolving complex (GO:0009654);; Biological Process: photosynthesis (GO:0015979);; Cellular Component: extrinsic component of membrane (GO:0019898);; Cellular Component: thylakoid lumen (GO:0031977);;	K02717|8.17753e-132|sot:102585358|K02717 photosystem II oxygen-evolving enhancer protein 2 | (RefSeq) psbP-like protein 1, chloroplastic	Photosynthesis (ko00195)	--	--	PsbP	PsbP-like protein 1, chloroplastic OS=Arabidopsis thaliana OX=3702 GN=PPL1 PE=1 SV=1	G	Carbohydrate transport and metabolism	PREDICTED: psbP-like protein 1, chloroplastic [Nicotiana attenuata]	molecular function: binding (GO:0005488);; cellular component: cell (GO:0005623);; cellular component: organelle (GO:0043226);; cellular component: cell part (GO:0044464);; cellular component: membrane (GO:0016020);; cellular component: macromolecular complex (GO:0032991);; cellular component: membrane part (GO:0044425);; biological process: metabolic process (GO:0008152);; biological process: ce…
Niben101Scf00338g03002	Niben101Scf00338g03002	33.9761	39.7398	43.425	32.6238	29.4551	25.468	33.7671	35.4206	33.9324	45.6287	41.9191	47.6806	0.032061	-0.41268	normal	0.264731	0.289173	normal	0.405472	-0.25033	normal	6.62e-08	-1.02744	down	2.5e-06	-0.71107	normal	--	--	Cellular Component: chloroplast (GO:0009507);; Cellular Component: thylakoid lumen (GO:0031977);;	--	--	--	--	--	Thylakoid lumenal 17.9 kDa protein, chloroplastic OS=Arabidopsis thaliana OX=3702 GN=At4g24930 PE=1 SV=1	S	Function unknown	PREDICTED: thylakoid lumenal 17.9 kDa protein, chloroplastic [Nicotiana sylvestris]	cellular component: cell (GO:0005623);; cellular component: organelle (GO:0043226);; cellular component: cell part (GO:0044464)
Niben101Scf00338g03020	Niben101Scf00338g03020	49.054	48.9639	58.4518	41.6288	37.9342	36.074	48.0776	44.6021	46.3522	64.2503	56.5504	64.4812	0.055178	-0.39756	normal	0.208193	0.317871	normal	0.374998	-0.27608	normal	2.49e-08	-1.0781	down	2.27e-05	-0.72626	normal	--	--	Cellular Component: intracellular part (GO:0044424);;	--	--	--	--	--	--	S	Function unknown	PREDICTED: thylakoid lumenal 17.9 kDa protein, chloroplastic-like isoform X2 [Nicotiana tabacum]	cellular component: cell (GO:0005623);; cellular component: cell part (GO:0044464)
Niben101Scf00338g09028	Niben101Scf00338g09028	0.779109	0.706977	0.609318	1.21157	1.79334	1.35604	1.09709	1.27195	1.03361	0.240213	0.521858	0.356451	0.373435	0.36611	normal	0.627791	-0.23597	normal	0.361777	0.3947	normal	0.00018	1.33735	up	0.003711	1.00536	up	--	--	--	--	--	--	--	--	--	S	Function unknown	PREDICTED: uncharacterized protein LOC109216102 isoform X2 [Nicotiana attenuata]	--
Niben101Scf00338g10009	Niben101Scf00338g10009	0.703955	1.05379	0.643187	1.82367	3.0681	1.81509	0.456407	0.583064	1.12592	0.358678	0.399564	0.330029	0.574844	-0.29527	normal	0.000677	-1.24383	down	0.044504	0.628019	normal	1.33e-12	2.0022	up	0.239846	0.503134	normal	[G]	Carbohydrate transport and metabolism	Molecular Function: beta-galactosidase activity (GO:0004565);; Cellular Component: vacuole (GO:0005773);; Biological Process: carbohydrate metabolic process (GO:0005975);; Cellular Component: plant-type cell wall (GO:0009505);; Molecular Function: carbohydrate binding (GO:0030246);;	--	--	[G]	Carbohydrate transport and metabolism	Glycosyl hydrolases family 35;; Glycosyl hydrolases family 35	Beta-galactosidase 10 OS=Arabidopsis thaliana OX=3702 GN=BGAL10 PE=2 SV=1	G	Carbohydrate transport and metabolism	beta-galactosidase 10 [Nicotiana attenuata]	molecular function: catalytic activity (GO:0003824);; cellular component: cell (GO:0005623);; cellular component: organelle (GO:0043226);; cellular component: cell part (GO:0044464);; biological process: metabolic process (GO:0008152);; molecular function: binding (GO:0005488)
Niben101Scf00339g00001	Niben101Scf00339g00001	0.857624	0.485068	0.971599	1.57427	1.05114	1.08393	4.86061	2.82864	3.76278	1.02383	1.00648	1.04586	2.79e-06	1.52149	up	0.000136	1.35118	up	--	--	--	0.811372	-0.14125	normal	4.82e-05	1.25924	up	--	--	--	--	--	--	--	Protein of unknown function (DUF1645)	--	--	--	PREDICTED: uncharacterized protein LOC104223151 [Nicotiana sylvestris]	--
Niben101Scf00340g00006	Niben101Scf00340g00006	0.095879	0.227537	0	0.539862	2.77193	0.622777	0.044197	0	0.253043	0	0.042919	0	--	--	--	0.22994	-0.57715	normal	--	--	--	0.006705	1.55152	up	--	--	--	--	--	Molecular Function: DNA binding (GO:0003677);; Cellular Component: nucleus (GO:0005634);;	--	--	--	--	SBP domain	Squamosa promoter-binding-like protein 15 OS=Arabidopsis thaliana OX=3702 GN=SPL15 PE=1 SV=1	K	Transcription	PREDICTED: squamosa promoter-binding-like protein 9 [Nicotiana attenuata]	molecular function: binding (GO:0005488);; cellular component: cell (GO:0005623);; cellular component: organelle (GO:0043226);; cellular component: cell part (GO:0044464)
Niben101Scf00341g02007	Niben101Scf00341g02007	12.5913	12.219	13.6393	8.29539	5.65781	4.4516	6.35503	7.02942	8.67286	14.0976	11.323	12.3894	9.49e-06	-0.95497	normal	0.605923	0.271011	normal	0.953016	-0.04606	normal	7.13e-06	-1.34835	down	5.54e-06	-1.0276	down	--	--	Cellular Component: nucleus (GO:0005634);; Biological Process: regulation of transcription, DNA-templated (GO:0006355);; Molecular Function: sequence-specific DNA binding (GO:0043565);; Molecular Function: protein heterodimerization activity (GO:0046982);;	K08065|8.86784e-93|sot:102584379|K08065 nuclear transcription Y subunit beta | (RefSeq) nuclear transcription factor Y subunit B-3-like	--	[K]	Transcription	Histone-like transcription factor (CBF/NF-Y) and archaeal histone;; Core histone H2A/H2B/H3/H4	Nuclear transcription factor Y subunit B-3 OS=Arabidopsis thaliana OX=3702 GN=NFYB3 PE=1 SV=1	B	Chromatin structure and dynamics	PREDICTED: nuclear transcription factor Y subunit B-3-like [Nicotiana sylvestris]	cellular component: cell (GO:0005623);; cellular component: organelle (GO:0043226);; cellular component: cell part (GO:0044464);; biological process: biological regulation (GO:0065007);; molecular function: binding (GO:0005488)
Niben101Scf00344g03007	Niben101Scf00344g03007	1.82196	1.67075	1.94371	1.36105	0.643149	0.304368	2.15165	0.919484	1.59616	1.46234	1.84338	1.33699	0.401666	-0.37499	normal	0.247467	0.668916	normal	0.889159	0.108283	normal	0.017811	-1.12843	down	0.557243	-0.26994	normal	--	--	--	--	--	--	--	Fantastic Four meristem regulator	Protein FAF-like, chloroplastic OS=Arabidopsis thaliana OX=3702 GN=At5g22090 PE=2 SV=1	--	--	PREDICTED: protein FAF-like, chloroplastic [Nicotiana tomentosiformis]	--
Niben101Scf00347g00011	Niben101Scf00347g00011	2.43093	2.07869	1.36246	4.84776	10.2157	7.63351	3.20609	3.28632	5.10772	1.25511	1.65149	1.3326	0.035278	0.636923	normal	0.024927	-0.76866	normal	0.540417	0.277918	normal	2.01e-13	1.85557	up	2.54e-05	1.00755	up	--	--	--	K16812|5.37303e-57|sot:102594438|K16812 targeting protein for Xklp2 | (RefSeq) protein TPX2-like	--	--	--	SBP domain	Squamosa promoter-binding-like protein 5 OS=Arabidopsis thaliana OX=3702 GN=SPL5 PE=2 SV=1	S	Function unknown	PREDICTED: squamosa promoter-binding-like protein 3 [Nicotiana attenuata]	--
Niben101Scf00349g01014	Niben101Scf00349g01014	1.55662	2.60877	1.00374	3.43284	7.46615	2.97029	0.468418	0.777928	2.37184	0.904263	1.0482	0.51919	0.414855	-0.44313	normal	0.011589	-1.19444	down	0.216698	0.47807	normal	2.16e-06	1.76865	up	0.835435	0.142853	normal	--	--	--	--	--	[R]	General function prediction only	Zn-finger in Ran binding protein and others	--	S	Function unknown	PREDICTED: RNA-binding protein cabeza isoform X1 [Nicotiana tomentosiformis]	--
Niben101Scf00349g03001	Niben101Scf00349g03001	0.670412	0.544997	0.547933	0.869498	2.3425	0.979702	0.513843	0.715813	0.665594	0.289073	0.448189	0.274735	0.828857	-0.11627	normal	0.064678	-0.8158	normal	0.275987	0.433409	normal	0.00034	1.37992	up	0.201175	0.478798	normal	--	--	--	--	--	[P]	Inorganic ion transport and metabolism	Tesmin/TSO1-like CXC domain, cysteine-rich domain	CRC domain-containing protein TSO1 OS=Arabidopsis thaliana OX=3702 GN=TSO1 PE=1 SV=1	S	Function unknown	PREDICTED: CRC domain-containing protein TSO1-like [Nicotiana sylvestris]	--
Niben101Scf00352g00001	Niben101Scf00352g00001	6.66461	5.97511	5.45338	9.44235	11.238	14.2703	9.82497	5.70604	8.26306	3.60253	4.26782	2.97655	0.745406	0.133965	normal	0.2246	-0.43105	normal	0.0192	0.545887	normal	1.51e-08	1.20535	up	0.003393	0.724098	normal	--	--	--	--	--	--	--	Dof domain, zinc finger	Cyclic dof factor 2 OS=Arabidopsis thaliana OX=3702 GN=CDF2 PE=1 SV=2	T	Signal transduction mechanisms	PREDICTED: cyclic dof factor 1-like [Nicotiana sylvestris]	--
Niben101Scf00355g02001	Niben101Scf00355g02001	0.395605	0.956008	0.490538	2.33465	2.04436	2.50928	0.064442	0.168504	0.510889	0.355514	0	0.122404	--	--	--	3.67e-06	-1.92007	down	--	--	--	9.25e-06	2.25408	up	--	--	--	--	--	--	--	--	--	--	--	--	--	--	hypothetical protein A4A49_41077 [Nicotiana attenuata]	--
Niben101Scf00355g03001	Niben101Scf00355g03001	1.37388	0.883112	1.00819	0.60847	0.76103	0.703485	1.88152	1.25632	1.23637	1.49054	1.28413	1.52248	0.841229	0.130761	normal	0.041565	0.887281	normal	0.647821	-0.25751	normal	0.000411	-1.30861	down	0.571694	-0.26511	normal	--	--	Biological Process: flavonoid biosynthetic process (GO:0009813);; Cellular Component: intracellular membrane-bounded organelle (GO:0043231);; Biological Process: flavonoid glucuronidation (GO:0052696);; Molecular Function: quercetin 3-O-glucosyltransferase activity (GO:0080043);; Molecular Function: quercetin 7-O-glucosyltransferase activity (GO:0080044);;	--	--	[GC]	Carbohydrate transport and metabolism;; Energy production and conversion	--	Crocetin glucosyltransferase, chloroplastic OS=Gardenia jasminoides OX=114476 GN=UGT75L6 PE=1 SV=1	S	Function unknown	PREDICTED: crocetin glucosyltransferase, chloroplastic-like [Nicotiana sylvestris]	biological process: metabolic process (GO:0008152);; cellular component: cell (GO:0005623);; cellular component: organelle (GO:0043226);; cellular component: cell part (GO:0044464);; biological process: cellular process (GO:0009987);; biological process: single-organism process (GO:0044699);; molecular function: catalytic activity (GO:0003824)
Niben101Scf00361g02004	Niben101Scf00361g02004	16.0886	13.776	14.9681	9.82619	8.99673	10.068	16.1828	12.0579	11.8333	17.5416	13.9757	16.6771	0.088023	-0.38266	normal	0.047364	0.507883	normal	0.688606	-0.16409	normal	6.04e-09	-1.13718	down	0.008383	-0.57586	normal	[C]	Energy production and conversion	Biological Process: cytokinin metabolic process (GO:0009690);; Molecular Function: oxidoreductase activity, acting on CH-OH group of donors (GO:0016614);; Molecular Function: cytokinin dehydrogenase activity (GO:0019139);; Molecular Function: flavin adenine dinucleotide binding (GO:0050660);; Biological Process: oxidation-reduction process (GO:0055114);;	K00279|0|spen:107026651|K00279 cytokinin dehydrogenase [EC:1.5.99.12] | (RefSeq) cytokinin dehydrogenase 7-like	Zeatin biosynthesis (ko00908)	[C]	Energy production and conversion	Cytokinin dehydrogenase 1, FAD and cytokinin binding;; FAD binding domain	Cytokinin dehydrogenase 7 OS=Arabidopsis thaliana OX=3702 GN=CKX7 PE=1 SV=1	C	Energy production and conversion	PREDICTED: cytokinin dehydrogenase 7 [Nicotiana attenuata]	biological process: metabolic process (GO:0008152);; biological process: cellular process (GO:0009987);; biological process: biological regulation (GO:0065007);; biological process: single-organism process (GO:0044699);; molecular function: catalytic activity (GO:0003824);; molecular function: binding (GO:0005488)
Niben101Scf00367g02013	Niben101Scf00367g02013	37.6627	36.3434	45.3416	21.9061	17.9556	19.6916	36.6302	29.0089	23.8526	41.6681	43.5408	42.0911	0.006711	-0.61164	normal	0.026637	0.605474	normal	0.676262	-0.15065	normal	1.16e-19	-1.48439	down	1.27e-05	-0.80298	normal	--	--	Cellular Component: nucleus (GO:0005634);; Cellular Component: plasma membrane (GO:0005886);; Cellular Component: chloroplast thylakoid membrane (GO:0009535);; Biological Process: chloroplast organization (GO:0009658);; Cellular Component: chloroplast envelope (GO:0009941);; Biological Process: response to ozone (GO:0010193);; Cellular Component: plastoglobule (GO:0010287);; Cellular Component: t…	--	--	--	--	PAP_fibrillin	Plastid-lipid-associated protein 6, chloroplastic OS=Arabidopsis thaliana OX=3702 GN=PAP6 PE=1 SV=1	S	Function unknown	harpin binding protein 1, partial [Nicotiana benthamiana]	cellular component: cell (GO:0005623);; cellular component: organelle (GO:0043226);; cellular component: cell part (GO:0044464);; cellular component: membrane (GO:0016020);; cellular component: organelle part (GO:0044422);; biological process: cellular process (GO:0009987);; biological process: cellular component organization or biogenesis (GO:0071840);; biological process: response to stimulus (…
Niben101Scf00367g03013	Niben101Scf00367g03013	0.302045	1.30012	0.37525	1.0268	1.25997	1.38243	0.252622	0.287621	0.515435	0.112146	0.060355	0.083439	0.176781	-0.65136	normal	5.38e-05	-1.38884	down	--	--	--	1.67e-15	2.85865	up	--	--	--	--	--	Cellular Component: trans-Golgi network (GO:0005802);; Cellular Component: plasma membrane (GO:0005886);; Molecular Function: phosphate ion transmembrane transporter activity (GO:0015114);; Cellular Component: integral component of membrane (GO:0016021);; Biological Process: phosphate ion transmembrane transport (GO:0035435);;	--	--	[U]	Intracellular trafficking, secretion, and vesicular transport	EXS family;; SPX domain;; SPX domain	Phosphate transporter PHO1 OS=Arabidopsis thaliana OX=3702 GN=PHO1 PE=1 SV=1	T	Signal transduction mechanisms	PREDICTED: phosphate transporter PHO1 [Nicotiana tomentosiformis]	cellular component: cell (GO:0005623);; cellular component: organelle (GO:0043226);; cellular component: organelle part (GO:0044422);; cellular component: cell part (GO:0044464);; cellular component: membrane (GO:0016020);; biological process: localization (GO:0051179);; molecular function: transporter activity (GO:0005215);; cellular component: membrane part (GO:0044425)
Niben101Scf00367g03017	Niben101Scf00367g03017	0.588577	0.705831	0.345127	1.08962	4.36988	0.690525	0.251452	0.202247	0.412625	0.368743	0.231116	0.218368	0.039146	-0.81747	normal	0.000258	-1.6226	down	0.292889	0.433195	normal	0.000148	1.82774	up	--	--	--	--	--	--	--	--	--	--	--	KIN14B-interacting protein At4g14310 OS=Arabidopsis thaliana OX=3702 GN=At4g14310 PE=1 SV=1	S	Function unknown	PREDICTED: uncharacterized protein LOC109232370 [Nicotiana attenuata]	--
Niben101Scf00367g08003	Niben101Scf00367g08003	0.700979	1.52228	2.08013	2.06918	3.15884	4.5444	0.873112	1.12976	1.49052	1.00405	1.01874	0.756854	0.547178	-0.34922	normal	0.013128	-1.05327	down	--	--	--	0.004365	1.15902	up	--	--	--	--	--	--	--	--	--	--	--	--	--	--	PREDICTED: glycine-rich cell wall structural protein [Nicotiana attenuata]	--
Niben101Scf00369g02005	Niben101Scf00369g02005	36.4661	24.997	43.8523	25.9428	40.3474	34.8341	200.669	101.706	113.654	24.4843	28.7132	23.7977	2.15e-08	1.46739	up	1.61e-12	1.86801	up	0.377954	0.307407	normal	0.86956	-0.0459	normal	9.33e-18	1.90301	up	--	--	--	--	--	--	--	C2 domain	Protein SRC2 OS=Glycine max OX=3847 GN=SRC2 PE=2 SV=1	S	Function unknown	SRC2-like protein [Nicotiana benthamiana]	--
Niben101Scf00369g02017	Niben101Scf00369g02017	0.434187	0.405277	0.582123	0.752458	0.764524	0.715155	1.02977	0.850844	0.931608	0.15815	0.306003	0.336956	0.123601	0.582278	normal	0.41935	0.351705	normal	0.526281	0.310526	normal	0.033967	0.881694	normal	0.000823	1.1412	up	--	--	--	--	--	--	--	--	--	L	Replication, recombination and repair	PREDICTED: replication protein A 70 kDa DNA-binding subunit D-like, partial [Nicotiana attenuata]	--
Niben101Scf00369g05011	Niben101Scf00369g05011	12.667	51.5534	9.80646	64.1092	123.786	80.9284	6.35154	16.0162	28.3147	10.0555	8.33074	10.4288	0.667294	-0.26703	normal	0.00262	-1.40056	down	0.529568	0.252452	normal	9.81e-32	2.62752	up	0.666095	0.269792	normal	[G]	Carbohydrate transport and metabolism	Molecular Function: hydrolase activity, hydrolyzing O-glycosyl compounds (GO:0004553);; Cellular Component: cell wall (GO:0005618);; Biological Process: xyloglucan metabolic process (GO:0010411);; Cellular Component: integral component of membrane (GO:0016021);; Molecular Function: xyloglucan:xyloglucosyl transferase activity (GO:0016762);; Biological Process: cell wall biogenesis (GO:0042546);; …	K08235|0|sot:102603929|K08235 xyloglucan:xyloglucosyl transferase [EC:2.4.1.207] | (RefSeq) probable xyloglucan endotransglucosylase/hydrolase 1	--	--	--	Glycosyl hydrolases family 16;; Xyloglucan endo-transglycosylase (XET) C-terminus	Probable xyloglucan endotransglucosylase/hydrolase protein OS=Nicotiana tabacum OX=4097 GN=XTH PE=2 SV=1	--	--	probable xyloglucan endotransglucosylase/hydrolase protein precursor [Nicotiana tabacum]	molecular function: catalytic activity (GO:0003824);; cellular component: cell (GO:0005623);; cellular component: cell part (GO:0044464);; biological process: metabolic process (GO:0008152);; biological process: cellular process (GO:0009987);; cellular component: membrane (GO:0016020);; cellular component: membrane part (GO:0044425);; biological process: cellular component organization or biogene…
Niben101Scf00369g07016	Niben101Scf00369g07016	0.508284	0.693197	0.20079	0.9539	1.21001	0.972388	0.758114	0.878939	0.592199	0.372572	0.347264	0.285013	0.595697	0.302235	normal	0.41289	-0.35819	normal	0.826585	0.158766	normal	0.000738	1.08388	up	0.07939	0.648387	normal	[O]	Posttranslational modification, protein turnover, chaperones	Molecular Function: ATP binding (GO:0005524);; Cellular Component: mediator complex (GO:0016592);;	K09490|0|sot:102604599|K09490 heat shock 70kDa protein 5 | (RefSeq) luminal-binding protein 5	Protein export (ko03060);; Protein processing in endoplasmic reticulum (ko04141)	[O]	Posttranslational modification, protein turnover, chaperones	Hsp70 protein;; MreB/Mbl protein;; Erv1 / Alr family;; Hsp20/alpha crystallin family	Mediator of RNA polymerase II transcription subunit 37f OS=Arabidopsis thaliana OX=3702 GN=MED37F PE=1 SV=2	O	Posttranslational modification, protein turnover, chaperones	PREDICTED: luminal-binding protein 5-like [Nicotiana sylvestris]	molecular function: binding (GO:0005488);; cellular component: cell (GO:0005623);; cellular component: membrane-enclosed lumen (GO:0031974);; cellular component: macromolecular complex (GO:0032991);; cellular component: organelle (GO:0043226);; cellular component: organelle part (GO:0044422);; cellular component: cell part (GO:0044464)
Niben101Scf00369g15012	Niben101Scf00369g15012	2.9298	3.74191	2.6704	5.78833	7.5671	3.44806	1.26739	2.48949	2.4055	3.76372	3.31672	3.65011	0.12232	-0.62933	normal	0.015525	-1.03392	down	0.793986	-0.17581	normal	0.718718	0.176126	normal	0.008295	-0.91864	normal	--	--	Cellular Component: integral component of membrane (GO:0016021);; Biological Process: carbohydrate transmembrane transport (GO:0034219);; Molecular Function: sugar transmembrane transporter activity (GO:0051119);;	K15382|2.15878e-58|sot:102584588|K15382 solute carrier family 50 (sugar transporter) | (RefSeq) bidirectional sugar transporter SWEET16-like	--	[R]	General function prediction only	Sugar efflux transporter for intercellular exchange	Bidirectional sugar transporter SWEET17 OS=Arabidopsis thaliana OX=3702 GN=SWEET17 PE=1 SV=2	U	Intracellular trafficking, secretion, and vesicular transport	PREDICTED: bidirectional sugar transporter SWEET16-like [Nicotiana sylvestris]	cellular component: membrane (GO:0016020);; cellular component: membrane part (GO:0044425);; biological process: single-organism process (GO:0044699);; biological process: localization (GO:0051179);; molecular function: transporter activity (GO:0005215)
Niben101Scf00369g21005	Niben101Scf00369g21005	1.68071	0.948988	2.62999	0.97464	1.43873	0.989335	6.85172	4.69374	3.40737	1.53231	3.09475	1.78294	0.010212	0.933538	normal	1.86e-09	1.84841	up	0.795438	-0.17963	normal	0.00027	-1.20874	down	0.02064	0.758729	normal	--	--	--	--	--	--	--	Phloem protein 2;; F-box-like;; F-box domain	F-box protein PP2-B15 OS=Arabidopsis thaliana OX=3702 GN=PP2B15 PE=2 SV=2	--	--	PREDICTED: F-box protein PP2-B15-like [Nicotiana tomentosiformis]	--
Niben101Scf00369g21009	Niben101Scf00369g21009	3.42814	3.55183	2.66336	5.18214	22.92	2.60776	2.06207	2.54797	2.96388	1.89983	2.07974	2.10159	0.201588	-0.48143	normal	0.027717	-1.11213	down	0.437025	0.348956	normal	0.095261	1.0457	normal	0.968482	-0.02451	normal	--	--	Molecular Function: dUTP diphosphatase activity (GO:0004170);; Biological Process: dUMP biosynthetic process (GO:0006226);; Biological Process: dUTP metabolic process (GO:0046080);; Molecular Function: metal ion binding (GO:0046872);;	K01520|2.08196e-50|spen:107010612|K01520 dUTP pyrophosphatase [EC:3.6.1.23] | (RefSeq) deoxyuridine 5'-triphosphate nucleotidohydrolase	Pyrimidine metabolism (ko00240)	[F]	Nucleotide transport and metabolism	dUTPase	Deoxyuridine 5&apos;-triphosphate nucleotidohydrolase OS=Solanum lycopersicum OX=4081 PE=2 SV=1	F	Nucleotide transport and metabolism	PREDICTED: deoxyuridine 5&apos;-triphosphate nucleotidohydrolase [Nicotiana attenuata]	molecular function: catalytic activity (GO:0003824);; biological process: metabolic process (GO:0008152);; biological process: cellular process (GO:0009987);; biological process: single-organism process (GO:0044699);; molecular function: binding (GO:0005488)
Niben101Scf00370g03002	Niben101Scf00370g03002	1.44312	0.941764	1.38536	0.711638	0.600109	0.956755	2.26538	1.63702	1.23818	1.33127	1.05582	1.1433	0.783207	0.157022	normal	0.00865	1.0078	up	0.994526	0.007834	normal	0.005774	-0.96309	normal	0.735827	0.160822	normal	--	--	Cellular Component: nucleus (GO:0005634);; Biological Process: histone H3-K18 acetylation (GO:0043971);; Biological Process: DNA demethylation (GO:0080111);;	--	--	--	--	--	Alpha-crystallin domain-containing protein 22.3 OS=Arabidopsis thaliana OX=3702 GN=ACD22.3 PE=1 SV=1	S	Function unknown	PREDICTED: increased DNA methylation 2-like [Nicotiana attenuata]	cellular component: cell (GO:0005623);; cellular component: organelle (GO:0043226);; cellular component: cell part (GO:0044464);; biological process: metabolic process (GO:0008152);; biological process: cellular process (GO:0009987);; biological process: cellular component organization or biogenesis (GO:0071840);; biological process: single-organism process (GO:0044699)
Niben101Scf00370g03034	Niben101Scf00370g03034	0.75787	0.308249	0.28424	0.306642	0.431396	2.50209	5.17682	1.6669	1.25499	0.233302	0.869831	0.572666	0.000229	1.40236	up	0.479349	0.449142	normal	0.859099	-0.13262	normal	0.608933	0.364177	normal	0.060829	0.881601	normal	[IQR]	Lipid transport and metabolism;; Secondary metabolites biosynthesis, transport and catabolism;; General function prediction only	Molecular Function: oxidoreductase activity (GO:0016491);; Biological Process: oxidation-reduction process (GO:0055114);;	--	--	[R]	General function prediction only	Enoyl-(Acyl carrier protein) reductase;; short chain dehydrogenase;; KR domain	NADPH-dependent aldehyde reductase 1, chloroplastic OS=Arabidopsis thaliana OX=3702 GN=ChlADR1 PE=1 SV=1	S	Function unknown	PREDICTED: glucose and ribitol dehydrogenase homolog 1 isoform X1 [Solanum tuberosum]	molecular function: catalytic activity (GO:0003824);; biological process: metabolic process (GO:0008152);; biological process: single-organism process (GO:0044699)
Niben101Scf00371g01007	Niben101Scf00371g01007	12.7	15.6473	12.8285	13.4012	13.1721	8.52598	5.81722	7.1175	9.31345	10.391	11.2461	10.3789	4.88e-07	-1.03848	down	0.133589	-0.5262	normal	0.372424	0.251033	normal	0.309144	-0.28237	normal	5.16e-05	-0.81049	normal	--	--	Cellular Component: integral component of membrane (GO:0016021);;	--	--	--	--	Protein of unknown function (DUF1218)	--	S	Function unknown	PREDICTED: uncharacterized protein LOC109228955 [Nicotiana attenuata]	cellular component: membrane (GO:0016020);; cellular component: membrane part (GO:0044425)
Niben101Scf00378g04001	Niben101Scf00378g04001	6.57031	9.47141	6.59613	5.39731	4.27295	4.42546	4.71904	5.2217	7.14289	7.50861	7.11552	7.42169	0.046885	-0.57251	normal	0.462056	0.305676	normal	0.967192	-0.0343	normal	1.21e-05	-1.0225	down	0.006441	-0.65225	normal	--	--	Biological Process: negative regulation of cellular process (GO:0048523);;	--	--	--	--	--	--	T	Signal transduction mechanisms	PREDICTED: cyclin-dependent kinase inhibitor 7-like [Nicotiana sylvestris]	biological process: biological regulation (GO:0065007)
Niben101Scf00380g01005	Niben101Scf00380g01005	27.7852	26.4134	29.3194	15.1356	11.0397	14.1309	24.6251	20.466	18.8777	32.7066	30.5066	34.5886	0.000509	-0.60095	normal	0.007222	0.678902	normal	0.233122	-0.27882	normal	7.25e-17	-1.6461	down	2.98e-08	-0.91486	normal	[IQ]	Lipid transport and metabolism;; Secondary metabolites biosynthesis, transport and catabolism	Molecular Function: catalytic activity (GO:0003824);; Biological Process: metabolic process (GO:0008152);;	--	--	[I]	Lipid transport and metabolism	AMP-binding enzyme;; AMP-binding enzyme C-terminal domain	Acetate/butyrate--CoA ligase AAE7, peroxisomal OS=Arabidopsis thaliana OX=3702 GN=AAE7 PE=1 SV=1	IQ	Lipid transport and metabolism;; Secondary metabolites biosynthesis, transport and catabolism	PREDICTED: acetate/butyrate--CoA ligase AAE7, peroxisomal-like [Nicotiana sylvestris]	molecular function: catalytic activity (GO:0003824);; biological process: metabolic process (GO:0008152)
Niben101Scf00381g06004	Niben101Scf00381g06004	2.96698	1.83247	3.99136	6.29312	5.73015	7.91413	12.5688	9.71876	21.5491	4.06384	10.8476	3.28926	1.11e-08	1.65161	up	0.001067	1.03986	up	0.467586	-0.31389	normal	0.631328	-0.22977	normal	0.254811	0.581061	normal	--	--	Cellular Component: membrane (GO:0016020);;	--	--	[S]	Function unknown	Membrane transport protein	Protein PIN-LIKES 7 OS=Arabidopsis thaliana OX=3702 GN=PILS7 PE=2 SV=1	S	Function unknown	PREDICTED: uncharacterized transporter C5D6.04-like isoform X2 [Nicotiana tabacum]	cellular component: membrane (GO:0016020)
Niben101Scf00383g03001	Niben101Scf00383g03001	0.944561	0.603632	0.482698	6.6218	6.41782	9.45212	2.94556	2.87003	6.1514	1.49225	1.39952	0.431725	7.71e-10	1.8139	up	0.062588	-0.71538	normal	0.408423	-0.37193	normal	3.93e-09	2.05789	up	0.069205	0.853558	normal	[MDT]	Cell wall/membrane/envelope biogenesis;; Cell cycle control, cell division, chromosome partitioning;; Signal transduction mechanisms	Molecular Function: ATP binding (GO:0005524);; Cellular Component: integral component of membrane (GO:0016021);;	K08900|0|spen:107009406|K08900 mitochondrial chaperone BCS1 | (RefSeq) AAA-ATPase At2g18193-like	--	[O]	Posttranslational modification, protein turnover, chaperones	ATPase family associated with various cellular activities (AAA);; Domain associated at C-terminal with AAA;; Holliday junction DNA helicase ruvB N-terminus;; Protein of unknown function (DUF815);; AAA ATPase domain;; RNA helicase;; P-loop containing region of AAA domain;; AAA domain;; AAA domain (dynein-related subfamily);; AAA domain;; ABC transporter;; 50S ribosome-binding GTPase;; Magnesium ch…	AAA-ATPase At2g18193 OS=Arabidopsis thaliana OX=3702 GN=At2g18193 PE=2 SV=1	O	Posttranslational modification, protein turnover, chaperones	PREDICTED: AAA-ATPase At2g18193-like [Nicotiana attenuata]	molecular function: binding (GO:0005488);; cellular component: membrane (GO:0016020);; cellular component: membrane part (GO:0044425)
Niben101Scf00389g01002	Niben101Scf00389g01002	21.5864	20.7405	23.549	15.0682	15.6385	12.8879	15.272	18.6157	18.0759	22.3649	25.791	24.2711	0.001565	-0.56104	normal	0.236386	0.308226	normal	0.513005	-0.19079	normal	7.2e-13	-1.13639	down	7.14e-08	-0.78902	normal	[S]	Function unknown	Cellular Component: chloroplast thylakoid membrane (GO:0009535);; Cellular Component: chloroplast thylakoid lumen (GO:0009543);;	--	--	--	--	Pentapeptide repeats (8 copies);; Pentapeptide repeats (9 copies);; Pentapeptide repeats (9 copies)	Thylakoid lumenal 15 kDa protein 1, chloroplastic OS=Arabidopsis thaliana OX=3702 GN=At2g44920 PE=1 SV=2	S	Function unknown	PREDICTED: thylakoid lumenal 15 kDa protein 1, chloroplastic isoform X1 [Nicotiana sylvestris]	cellular component: cell (GO:0005623);; cellular component: membrane (GO:0016020);; cellular component: organelle (GO:0043226);; cellular component: organelle part (GO:0044422);; cellular component: cell part (GO:0044464)
Niben101Scf00395g02018	Niben101Scf00395g02018	1.84944	1.49112	2.0576	1.65497	4.94259	2.05297	5.51669	2.65269	3.06543	1.32951	1.48026	1.19406	0.036891	0.675431	normal	0.532835	0.366276	normal	0.507647	0.272868	normal	0.150872	0.577656	normal	0.000296	1.00345	up	[K]	Transcription	Molecular Function: protein kinase activity (GO:0004672);; Molecular Function: ATP binding (GO:0005524);; Cellular Component: plasma membrane (GO:0005886);; Biological Process: protein phosphorylation (GO:0006468);; Cellular Component: plant-type cell wall (GO:0009505);; Cellular Component: plasmodesma (GO:0009506);; Cellular Component: integral component of membrane (GO:0016021);;	--	--	--	--	Protein tyrosine kinase;; Protein kinase domain;; Leucine rich repeat;; Leucine Rich repeats (2 copies);; Leucine Rich Repeat;; Leucine Rich repeat;; Leucine rich repeat N-terminal domain	Probably inactive leucine-rich repeat receptor-like protein kinase IMK2 OS=Arabidopsis thaliana OX=3702 GN=IMK2 PE=1 SV=1	S	Function unknown	PREDICTED: probably inactive leucine-rich repeat receptor-like protein kinase IMK2 [Nicotiana sylvestris]	biological process: metabolic process (GO:0008152);; biological process: cellular process (GO:0009987);; molecular function: catalytic activity (GO:0003824);; molecular function: binding (GO:0005488);; cellular component: cell (GO:0005623);; cellular component: membrane (GO:0016020);; cellular component: cell part (GO:0044464);; cellular component: cell junction (GO:0030054);; cellular component:…
Niben101Scf00397g06001	Niben101Scf00397g06001	2.34975	3.93375	2.63351	8.51485	11.574	5.19407	4.80833	5.37313	7.14417	2.92927	2.93535	1.63143	0.042963	0.614407	normal	0.373037	-0.40012	normal	0.889717	0.110935	normal	0.00034	1.19234	up	0.007174	0.766523	normal	--	--	--	--	--	[R]	General function prediction only	Cyclin;; Cyclin, N-terminal domain	Cyclin-U2-2 OS=Arabidopsis thaliana OX=3702 GN=CYCU2-2 PE=1 SV=1	S	Function unknown	PREDICTED: cyclin-U2-2-like [Nicotiana attenuata]	--
Niben101Scf00398g00002	Niben101Scf00398g00002	1.16598	1.08565	1.21388	6.7904	7.06266	6.61606	4.47034	5.14246	6.77649	0.831262	0.984476	0.91272	1.39e-10	1.66865	up	0.558015	-0.2293	normal	0.87364	0.127753	normal	9.47e-20	2.29526	up	4.78e-13	1.91143	up	--	--	Cellular Component: mitochondrion (GO:0005739);;	--	--	--	--	--	--	S	Function unknown	hypothetical protein NitaMp041 [Nicotiana tabacum]	cellular component: cell (GO:0005623);; cellular component: organelle (GO:0043226);; cellular component: cell part (GO:0044464)
Niben101Scf00402g01007	Niben101Scf00402g01007	0.550683	0.441899	0.226643	0.700194	2.51731	0.45956	0.19306	0.331413	0.256381	0.792754	0.448862	0.375077	--	--	--	0.009478	-1.25483	down	0.738888	-0.21039	normal	0.380496	0.526237	normal	0.01467	-0.98764	normal	--	--	Molecular Function: ATP binding (GO:0005524);; Cellular Component: nucleus (GO:0005634);; Cellular Component: cytoplasm (GO:0005737);; Biological Process: mitotic cell cycle (GO:0007067);; Molecular Function: histone kinase activity (H3-T11 specific) (GO:0035402);; Biological Process: histone H3-T11 phosphorylation (GO:0035407);; Biological Process: intracellular signal transduction (GO:0035556);…	K16315|0|sot:102585417|K16315 serine/threonine-protein kinase haspin [EC:2.7.11.1] | (RefSeq) putative serine/threonine-protein kinase haspin homolog	--	[D]	Cell cycle control, cell division, chromosome partitioning	Haspin like kinase domain	Serine/threonine-protein kinase haspin homolog OS=Arabidopsis thaliana OX=3702 GN=HASPIN PE=1 SV=1	D	Cell cycle control, cell division, chromosome partitioning	PREDICTED: serine/threonine-protein kinase haspin homolog [Nicotiana attenuata]	molecular function: binding (GO:0005488);; cellular component: cell (GO:0005623);; cellular component: organelle (GO:0043226);; cellular component: cell part (GO:0044464);; biological process: metabolic process (GO:0008152);; biological process: cellular process (GO:0009987);; biological process: cellular component organization or biogenesis (GO:0071840);; molecular function: catalytic activity (…
Niben101Scf00404g03003	Niben101Scf00404g03003	0.398267	0.539488	0.324212	0.808358	1.20636	1.21458	0.948259	0.73224	1.00663	0.201588	0.3263	0.287442	0.063525	0.669139	normal	0.772511	-0.15783	normal	0.661515	0.251169	normal	5.11e-05	1.36701	up	0.00054	1.11578	up	--	--	Molecular Function: calmodulin binding (GO:0005516);; Biological Process: response to stress (GO:0006950);;	--	--	--	--	Calmodulin binding protein-like	Calmodulin-binding protein 60 C OS=Arabidopsis thaliana OX=3702 GN=CBP60C PE=2 SV=1	S	Function unknown	PREDICTED: uncharacterized protein LOC104213840 isoform X1 [Nicotiana sylvestris]	molecular function: binding (GO:0005488);; biological process: response to stimulus (GO:0050896)
Niben101Scf00406g00015	Niben101Scf00406g00015	11.2961	12.6416	13.8118	9.30571	7.43991	6.91867	10.3284	9.86128	10.6619	14.6557	13.8399	15.6086	0.002373	-0.51666	normal	0.109015	0.420182	normal	0.325875	-0.26839	normal	1.96e-10	-1.27918	down	8.96e-09	-0.83172	normal	[EH]	Amino acid transport and metabolism;; Coenzyme transport and metabolism	Biological Process: glutamine metabolic process (GO:0006541);; Cellular Component: chloroplast (GO:0009507);; Molecular Function: oxo-acid-lyase activity (GO:0016833);; Biological Process: chorismate metabolic process (GO:0046417);; Biological Process: tetrahydrofolate biosynthetic process (GO:0046654);; Biological Process: folic acid biosynthetic process (GO:0046656);; Molecular Function: 4-amin…	K13950|0|sot:102586660|K13950 para-aminobenzoate synthetase [EC:2.6.1.85] | (RefSeq) aminodeoxychorismate synthase, chloroplastic	Folate biosynthesis (ko00790)	[J]	Translation, ribosomal structure and biogenesis	chorismate binding enzyme;; Anthranilate synthase component I, N terminal region;; Glutamine amidotransferase class-I	Aminodeoxychorismate synthase, chloroplastic OS=Solanum lycopersicum OX=4081 GN=ADCS PE=2 SV=1	E	Amino acid transport and metabolism	PREDICTED: aminodeoxychorismate synthase, chloroplastic [Nicotiana sylvestris]	biological process: metabolic process (GO:0008152);; biological process: cellular process (GO:0009987);; biological process: single-organism process (GO:0044699);; cellular component: cell (GO:0005623);; cellular component: organelle (GO:0043226);; cellular component: cell part (GO:0044464);; molecular function: catalytic activity (GO:0003824)
Niben101Scf00406g03001	Niben101Scf00406g03001	880.651	963.938	854.656	629.928	448.455	453.787	658.524	645.509	644.436	982.355	769.542	842.763	2.68e-10	-0.69936	normal	0.182924	0.381379	normal	0.966193	-0.02737	normal	5.6e-07	-1.13662	down	8.76e-06	-0.73184	normal	--	--	Biological Process: response to light stimulus (GO:0009416);; Cellular Component: photosystem I (GO:0009522);; Cellular Component: photosystem II (GO:0009523);; Cellular Component: chloroplast thylakoid membrane (GO:0009535);; Biological Process: photosynthesis, light harvesting in photosystem I (GO:0009768);; Cellular Component: chloroplast envelope (GO:0009941);; Cellular Component: plastoglobu…	K08907|7.35977e-149|spen:107020333|K08907 light-harvesting complex I chlorophyll a/b binding protein 1 | (RefSeq) chlorophyll a-b binding protein 6A, chloroplastic	Photosynthesis - antenna proteins (ko00196)	--	--	Chlorophyll A-B binding protein	Chlorophyll a-b binding protein 6A, chloroplastic OS=Solanum lycopersicum OX=4081 GN=CAB6A PE=2 SV=1	O	Posttranslational modification, protein turnover, chaperones	PREDICTED: chlorophyll a-b binding protein 6A, chloroplastic-like [Nicotiana sylvestris]	biological process: response to stimulus (GO:0050896);; cellular component: cell (GO:0005623);; cellular component: membrane (GO:0016020);; cellular component: macromolecular complex (GO:0032991);; cellular component: membrane part (GO:0044425);; cellular component: cell part (GO:0044464);; cellular component: organelle (GO:0043226);; cellular component: organelle part (GO:0044422);; biological p…
Niben101Scf00408g00002	Niben101Scf00408g00002	0.453662	0.829263	1.09423	1.12124	3.29576	1.04485	0.358794	0.467462	0.521369	0.370504	0.549682	0.374993	0.058754	-0.76188	normal	0.00107	-1.36815	down	0.363162	0.394472	normal	0.001473	1.34764	up	0.672102	-0.218	normal	[K]	Transcription	Molecular Function: protein kinase activity (GO:0004672);; Molecular Function: ATP binding (GO:0005524);; Biological Process: protein phosphorylation (GO:0006468);; Cellular Component: integral component of membrane (GO:0016021);; Molecular Function: oxidoreductase activity (GO:0016491);;	--	--	--	--	Protein tyrosine kinase;; Protein kinase domain;; Leucine rich repeat N-terminal domain;; Leucine rich repeat;; Leucine Rich repeats (2 copies)	Probable inactive receptor kinase At5g58300 OS=Arabidopsis thaliana OX=3702 GN=At5g58300 PE=2 SV=1	S	Function unknown	PREDICTED: probable inactive leucine-rich repeat receptor-like protein kinase At1g66830 [Nicotiana sylvestris]	biological process: metabolic process (GO:0008152);; biological process: cellular process (GO:0009987);; molecular function: catalytic activity (GO:0003824);; molecular function: binding (GO:0005488);; cellular component: membrane (GO:0016020);; cellular component: membrane part (GO:0044425)
Niben101Scf00409g00002	Niben101Scf00409g00002	73.564	78.4635	88.9395	63.1552	52.1163	53.6738	72.7684	66.3327	70.3178	94.1667	94.6326	101.201	0.00905	-0.43468	normal	0.114063	0.359127	normal	0.148824	-0.31153	normal	6.21e-12	-1.17619	down	3.42e-10	-0.79228	normal	[E]	Amino acid transport and metabolism	Molecular Function: chorismate synthase activity (GO:0004107);; Cellular Component: nucleolus (GO:0005730);; Cellular Component: cytosol (GO:0005829);; Biological Process: aromatic amino acid family biosynthetic process (GO:0009073);; Biological Process: chorismate biosynthetic process (GO:0009423);; Cellular Component: chloroplast stroma (GO:0009570);; Molecular Function: FMN binding (GO:0010181…	K01736|0|sot:102589491|K01736 chorismate synthase [EC:4.2.3.5] | (RefSeq) chorismate synthase 1, chloroplastic	Phenylalanine, tyrosine and tryptophan biosynthesis (ko00400);; Biosynthesis of amino acids (ko01230)	[E]	Amino acid transport and metabolism	Chorismate synthase	Chorismate synthase 1, chloroplastic OS=Solanum lycopersicum OX=4081 GN=CS1 PE=2 SV=1	E	Amino acid transport and metabolism	PREDICTED: chorismate synthase 1, chloroplastic [Nicotiana sylvestris]	molecular function: catalytic activity (GO:0003824);; cellular component: cell (GO:0005623);; cellular component: organelle (GO:0043226);; cellular component: organelle part (GO:0044422);; cellular component: cell part (GO:0044464);; biological process: metabolic process (GO:0008152);; biological process: cellular process (GO:0009987);; biological process: single-organism process (GO:0044699);; m…
Niben101Scf00410g01018	Niben101Scf00410g01018	1.19421	3.04538	2.26525	2.50631	5.30271	2.02179	0.088758	0.401258	1.26115	0.603466	1.36908	1.42919	--	--	--	0.014517	-1.2237	down	--	--	--	0.074884	0.867679	normal	--	--	--	--	--	Cellular Component: integral component of membrane (GO:0016021);;	--	--	--	--	Late embryogenesis abundant protein	--	S	Function unknown	PREDICTED: uncharacterized protein LOC107827457 [Nicotiana tabacum]	cellular component: membrane (GO:0016020);; cellular component: membrane part (GO:0044425)
Niben101Scf00414g10003	Niben101Scf00414g10003	0.448342	0.338796	0.177981	0.951387	2.29388	0.668729	0.312434	0.43256	0.464078	0.276857	0.3083	0.161741	--	--	--	0.02921	-1.05458	down	--	--	--	0.002193	1.4712	up	--	--	--	--	--	Cellular Component: endoplasmic reticulum membrane (GO:0005789);; Biological Process: transport (GO:0006810);; Cellular Component: integral component of membrane (GO:0016021);;	K20347|6.38669e-121|spen:107007212|K20347 p24 family protein beta-1 | (RefSeq) transmembrane emp24 domain-containing protein p24beta2-like	--	[U]	Intracellular trafficking, secretion, and vesicular transport	emp24/gp25L/p24 family/GOLD	Transmembrane emp24 domain-containing protein p24beta2 OS=Arabidopsis thaliana OX=3702 GN=At3g07680 PE=1 SV=1	U	Intracellular trafficking, secretion, and vesicular transport	transmembrane emp24 domain-containing protein p24beta2, partial [Nicotiana attenuata]	cellular component: cell (GO:0005623);; cellular component: membrane (GO:0016020);; cellular component: organelle (GO:0043226);; cellular component: organelle part (GO:0044422);; cellular component: membrane part (GO:0044425);; cellular component: cell part (GO:0044464);; biological process: localization (GO:0051179)
Niben101Scf00416g00007	Niben101Scf00416g00007	0.754776	0.763084	0.580926	1.36508	1.09205	1.04494	0.492446	0.379964	1.1795	0.33408	0.369366	0.308576	0.801416	-0.17697	normal	0.409526	-0.49213	normal	--	--	--	0.004436	1.1616	up	--	--	--	--	--	--	--	--	[T]	Signal transduction mechanisms	Protein of unknown function (DUF568)	Cytochrome b561 and DOMON domain-containing protein At5g35735 OS=Arabidopsis thaliana OX=3702 GN=At5g35735 PE=2 SV=1	S	Function unknown	PREDICTED: cytochrome b561 and DOMON domain-containing protein At3g25290-like [Nicotiana sylvestris]	--
Niben101Scf00417g00008	Niben101Scf00417g00008	4.03478	4.62842	2.27356	9.77019	15.3361	10.935	3.19667	3.737	6.02651	2.63545	3.08608	2.11957	0.995234	0.004217	normal	1.01e-05	-1.23454	down	0.539875	0.281025	normal	1.27e-15	1.68972	up	0.308741	0.344719	normal	[T]	Signal transduction mechanisms	Molecular Function: magnesium ion binding (GO:0000287);; Molecular Function: pyruvate kinase activity (GO:0004743);; Biological Process: glycolytic process (GO:0006096);; Molecular Function: kinase activity (GO:0016301);; Molecular Function: potassium ion binding (GO:0030955);;	K00873|0|sly:101248036|K00873 pyruvate kinase [EC:2.7.1.40] | (RefSeq) pyruvate kinase 1, cytosolic	Glycolysis / Gluconeogenesis (ko00010);; Purine metabolism (ko00230);; Pyruvate metabolism (ko00620);; Carbon metabolism (ko01200);; Biosynthesis of amino acids (ko01230)	[G]	Carbohydrate transport and metabolism	Pyruvate kinase, barrel domain;; Pyruvate kinase, alpha/beta domain	Pyruvate kinase 1, cytosolic OS=Oryza sativa subsp. japonica OX=39947 GN=Os11g0148500 PE=1 SV=1	G	Carbohydrate transport and metabolism	PREDICTED: pyruvate kinase, cytosolic isozyme-like isoform X2 [Nicotiana sylvestris]	molecular function: binding (GO:0005488);; molecular function: catalytic activity (GO:0003824);; biological process: metabolic process (GO:0008152);; biological process: cellular process (GO:0009987);; biological process: single-organism process (GO:0044699)
Niben101Scf00418g02008	Niben101Scf00418g02008	1.14709	1.03269	0.228412	1.44855	6.14947	0.9363	0.191648	0.47715	0.52275	0.7452	0.408244	0.329642	--	--	--	0.00102	-1.51691	down	0.756357	0.190547	normal	0.004455	1.47158	up	--	--	--	--	--	Molecular Function: microtubule binding (GO:0008017);;	K10436|2.0716e-174|sot:102603900|K10436 microtubule-associated protein, RP/EB family | (RefSeq) microtubule-associated protein RP/EB family member 1C	--	[DZ]	Cell cycle control, cell division, chromosome partitioning;; Cytoskeleton	EB1-like C-terminal motif	Microtubule-associated protein RP/EB family member 1C OS=Arabidopsis thaliana OX=3702 GN=EB1C PE=1 SV=1	Z	Cytoskeleton	PREDICTED: microtubule-associated protein RP/EB family member 1C [Nicotiana attenuata]	molecular function: binding (GO:0005488)
Niben101Scf00421g01025	Niben101Scf00421g01025	23.2587	30.4729	23.4084	57.9989	65.8864	54.1267	19.9436	22.2728	42.088	16.2386	16.145	11.075	0.836191	-0.10659	normal	0.003986	-0.89248	normal	0.003748	0.62369	normal	9.11e-17	1.55051	up	0.078005	0.539316	normal	[G]	Carbohydrate transport and metabolism	Molecular Function: polygalacturonase activity (GO:0004650);; Biological Process: carbohydrate metabolic process (GO:0005975);; Cellular Component: integral component of membrane (GO:0016021);;	--	--	--	--	Glycosyl hydrolases family 28;; Pectate lyase superfamily protein	Probable polygalacturonase OS=Vitis vinifera OX=29760 GN=GSVIVT00026920001 PE=1 SV=1	M	Cell wall/membrane/envelope biogenesis	PREDICTED: probable polygalacturonase [Nicotiana sylvestris]	molecular function: catalytic activity (GO:0003824);; biological process: metabolic process (GO:0008152);; cellular component: membrane (GO:0016020);; cellular component: membrane part (GO:0044425)
Niben101Scf00422g01021	Niben101Scf00422g01021	3.10856	2.17109	2.13187	3.74134	4.79259	8.65502	7.64787	4.46781	4.19141	1.28653	2.16773	1.97263	0.006245	0.774124	normal	0.99454	0.005532	normal	0.490855	0.28326	normal	0.000286	1.12861	up	1.85e-05	1.11074	up	[G]	Carbohydrate transport and metabolism	Molecular Function: beta-galactosidase activity (GO:0004565);; Cellular Component: cell wall (GO:0005618);; Cellular Component: vacuole (GO:0005773);; Biological Process: carbohydrate metabolic process (GO:0005975);;	--	--	[G]	Carbohydrate transport and metabolism	Glycosyl hydrolases family 35;; Glycosyl hydrolases family 35;; Beta-galactosidase	Beta-galactosidase OS=Malus domestica OX=3750 PE=1 SV=1	G	Carbohydrate transport and metabolism	PREDICTED: beta-galactosidase-like [Nicotiana sylvestris]	molecular function: catalytic activity (GO:0003824);; cellular component: cell (GO:0005623);; cellular component: cell part (GO:0044464);; cellular component: organelle (GO:0043226);; biological process: metabolic process (GO:0008152)
Niben101Scf00425g03002	Niben101Scf00425g03002	1.05726	0.352835	0.340371	1.10655	1.19518	2.64187	1.69822	1.36979	0.82824	0.409578	0.799252	0.37683	0.148666	0.637961	normal	0.762319	-0.20468	normal	0.97691	0.031497	normal	0.008093	1.05776	up	0.025614	0.790539	normal	--	--	Cellular Component: integral component of membrane (GO:0016021);;	--	--	--	--	Zein-binding	Probable myosin-binding protein 6 OS=Arabidopsis thaliana OX=3702 GN=MYOB6 PE=2 SV=1	S	Function unknown	PREDICTED: probable myosin-binding protein 5 [Nicotiana attenuata]	cellular component: membrane (GO:0016020);; cellular component: membrane part (GO:0044425)
Niben101Scf00426g01004	Niben101Scf00426g01004	18.2152	18.3165	17.6965	26.5272	44.7835	27.0464	19.0391	15.885	27.3961	12.8292	11.32	10.455	0.924487	-0.04423	normal	0.153743	-0.51324	normal	0.021337	0.488029	normal	2e-05	1.0056	up	0.083305	0.457795	normal	--	--	Molecular Function: electron carrier activity (GO:0009055);; Cellular Component: anchored component of plasma membrane (GO:0046658);;	--	--	--	--	Plastocyanin-like domain	Uclacyanin 1 OS=Arabidopsis thaliana OX=3702 GN=UCC1 PE=1 SV=1	S	Function unknown	PREDICTED: mavicyanin-like [Nicotiana attenuata]	molecular function: electron carrier activity (GO:0009055);; cellular component: cell (GO:0005623);; cellular component: membrane (GO:0016020);; cellular component: membrane part (GO:0044425);; cellular component: cell part (GO:0044464)
Niben101Scf00428g08008	Niben101Scf00428g08008	0.801679	0.407561	0.278286	0.59213	4.00332	0.518174	0.332875	0.189869	0.392975	0.217242	0.417432	0.22908	0.195646	-0.60482	normal	0.011039	-1.25614	down	0.551292	0.298567	normal	0.078758	1.10311	normal	0.782261	-0.16869	normal	--	--	Biological Process: cell plate assembly (GO:0000919);; Molecular Function: microtubule motor activity (GO:0003777);; Molecular Function: ATP binding (GO:0005524);; Cellular Component: nucleus (GO:0005634);; Cellular Component: kinesin complex (GO:0005871);; Cellular Component: microtubule (GO:0005874);; Biological Process: microtubule-based movement (GO:0007018);; Molecular Function: microtubule …	K11498|0|spen:107012084|K11498 centromeric protein E | (RefSeq) kinesin-like protein NACK1	--	[Z]	Cytoskeleton	Kinesin motor domain;; Domain of unknown function (DUF3490);; Microtubule binding	Kinesin-like protein NACK1 OS=Nicotiana tabacum OX=4097 GN=NACK1 PE=1 SV=1	Z	Cytoskeleton	kinesin-like protein NACK1 [Nicotiana tabacum]	biological process: cellular process (GO:0009987);; biological process: single-organism process (GO:0044699);; biological process: cellular component organization or biogenesis (GO:0071840);; molecular function: catalytic activity (GO:0003824);; molecular function: binding (GO:0005488);; cellular component: cell (GO:0005623);; cellular component: organelle (GO:0043226);; cellular component: cell …
Niben101Scf00428g08011	Niben101Scf00428g08011	12.7617	15.8261	12.4819	31.3565	33.7479	35.3685	20.3086	30.6567	26.9315	13.1833	10.4792	12.0245	0.025413	0.603458	normal	0.430125	-0.27117	normal	0.911222	0.086168	normal	6.07e-06	1.00878	up	0.00773	0.702008	normal	--	--	--	--	--	--	--	Probable lipid transfer	Non-specific lipid-transfer protein 2 OS=Apium graveolens var. rapaceum OX=278110 PE=1 SV=1	U	Intracellular trafficking, secretion, and vesicular transport	PREDICTED: non-specific lipid-transfer protein 2-like [Nicotiana tomentosiformis]	--
Niben101Scf00428g09005	Niben101Scf00428g09005	3.6235	2.22752	7.93278	5.25034	5.86457	9.21805	25.6143	11.2839	20.1832	2.67715	5.63423	2.71512	0.050046	0.873311	normal	4.11e-05	1.32079	up	0.925542	0.075477	normal	0.240611	0.432636	normal	3.25e-10	1.74806	up	--	--	Molecular Function: calmodulin binding (GO:0005516);; Biological Process: response to stress (GO:0006950);;	--	--	--	--	Calmodulin binding protein-like	Protein SAR DEFICIENT 1 OS=Arabidopsis thaliana OX=3702 GN=SARD1 PE=1 SV=1	S	Function unknown	PREDICTED: protein SAR DEFICIENT 1-like [Nicotiana tabacum]	molecular function: binding (GO:0005488);; biological process: response to stimulus (GO:0050896)
Niben101Scf00428g12017	Niben101Scf00428g12017	0.585779	0.578258	0.576932	0.258309	0.47855	0.39109	0.662323	0.515516	0.645094	0.806689	1.17232	0.553485	0.73805	-0.15871	normal	0.104574	0.653062	normal	0.348976	-0.38583	normal	2.04e-05	-1.43025	down	0.034448	-0.6816	normal	[HC]	Coenzyme transport and metabolism;; Energy production and conversion	Molecular Function: monooxygenase activity (GO:0004497);; Biological Process: secondary metabolite biosynthetic process (GO:0044550);; Biological Process: oxidation-reduction process (GO:0055114);; Molecular Function: FAD binding (GO:0071949);;	--	--	[CR]	Energy production and conversion;; General function prediction only	FAD binding domain	Monooxygenase 3 OS=Arabidopsis thaliana OX=3702 GN=MO3 PE=2 SV=1	CH	Energy production and conversion;; Coenzyme transport and metabolism	PREDICTED: uncharacterized protein LOC109231275 [Nicotiana attenuata]	biological process: metabolic process (GO:0008152);; biological process: single-organism process (GO:0044699);; molecular function: catalytic activity (GO:0003824);; molecular function: binding (GO:0005488)
Niben101Scf00428g12019	Niben101Scf00428g12019	3.00535	2.88113	4.03451	2.90653	2.87427	1.7487	8.55527	6.07972	7.09663	4.89091	5.58311	3.21936	0.000398	0.797706	normal	2.09e-08	1.43335	up	0.195303	-0.41089	normal	1.11e-05	-1.20121	down	0.273783	0.306458	normal	[HC]	Coenzyme transport and metabolism;; Energy production and conversion	Molecular Function: monooxygenase activity (GO:0004497);; Biological Process: secondary metabolite biosynthetic process (GO:0044550);; Biological Process: oxidation-reduction process (GO:0055114);; Molecular Function: FAD binding (GO:0071949);;	--	--	[CR]	Energy production and conversion;; General function prediction only	FAD binding domain;; FAD binding domain;; Lycopene cyclase protein;; FAD binding domain;; NAD(P)-binding Rossmann-like domain	Monooxygenase 2 OS=Arabidopsis thaliana OX=3702 GN=MO2 PE=2 SV=1	CH	Energy production and conversion;; Coenzyme transport and metabolism	PREDICTED: uncharacterized protein LOC109231275 [Nicotiana attenuata]	biological process: metabolic process (GO:0008152);; biological process: single-organism process (GO:0044699);; molecular function: catalytic activity (GO:0003824);; molecular function: binding (GO:0005488)
Niben101Scf00428g15008	Niben101Scf00428g15008	0.496659	0.435374	0.380941	0.623261	2.40896	0.545145	0.39586	0.32663	0.599279	0.213782	0.198661	0.204908	0.764355	-0.17979	normal	0.110144	-0.84941	normal	0.183223	0.499139	normal	0.000843	1.58915	up	0.190304	0.570676	normal	[T]	Signal transduction mechanisms	Biological Process: double-strand break repair via break-induced replication (GO:0000727);; Molecular Function: protein serine/threonine kinase activity (GO:0004674);; Molecular Function: ATP binding (GO:0005524);; Cellular Component: nucleus (GO:0005634);; Cellular Component: cytoplasm (GO:0005737);; Biological Process: DNA replication initiation (GO:0006270);; Biological Process: phagocytosis (…	K02214|0|sot:102594272|K02214 cell division control protein 7 [EC:2.7.11.1] | (RefSeq) uncharacterized LOC102594272	--	[L]	Replication, recombination and repair	Protein kinase domain;; Protein tyrosine kinase	Calcium-dependent protein kinase 22 OS=Arabidopsis thaliana OX=3702 GN=CPK22 PE=3 SV=2	D	Cell cycle control, cell division, chromosome partitioning	PREDICTED: probable serine/threonine-protein kinase cdc7 [Nicotiana attenuata]	biological process: metabolic process (GO:0008152);; biological process: cellular process (GO:0009987);; biological process: response to stimulus (GO:0050896);; molecular function: catalytic activity (GO:0003824);; molecular function: binding (GO:0005488);; cellular component: cell (GO:0005623);; cellular component: organelle (GO:0043226);; cellular component: cell part (GO:0044464);; biological …
Niben101Scf00432g02007	Niben101Scf00432g02007	3.45213	3.32948	2.29269	4.96391	7.68186	4.70025	1.92437	2.01606	4.20475	1.64653	2.15295	1.61276	0.453491	-0.32758	normal	0.026976	-0.84403	normal	0.078019	0.505744	normal	1.02e-06	1.17529	up	0.634881	0.211373	normal	[M]	Cell wall/membrane/envelope biogenesis	Cellular Component: integral component of membrane (GO:0016021);; Molecular Function: UDP-glucuronate decarboxylase activity (GO:0048040);;	K08678|0|sot:102592280|K08678 UDP-glucuronate decarboxylase [EC:4.1.1.35] | (RefSeq) UDP-glucuronic acid decarboxylase 2	Starch and sucrose metabolism (ko00500);; Amino sugar and nucleotide sugar metabolism (ko00520)	[GM]	Carbohydrate transport and metabolism;; Cell wall/membrane/envelope biogenesis	GDP-mannose 4,6 dehydratase;; NAD dependent epimerase/dehydratase family;; Male sterility protein;; 3-beta hydroxysteroid dehydrogenase/isomerase family;; Polysaccharide biosynthesis protein;; RmlD substrate binding domain	UDP-glucuronic acid decarboxylase 2 OS=Arabidopsis thaliana OX=3702 GN=UXS2 PE=1 SV=1	M	Cell wall/membrane/envelope biogenesis	PREDICTED: UDP-glucuronic acid decarboxylase 2-like [Nicotiana attenuata]	cellular component: membrane (GO:0016020);; cellular component: membrane part (GO:0044425);; molecular function: catalytic activity (GO:0003824)
Niben101Scf00435g01006	Niben101Scf00435g01006	0.805011	1.6852	1.37272	3.0176	5.06093	2.83044	1.14356	1.99952	1.23142	1.13034	1.25852	0.810477	0.942603	-0.05319	normal	0.00654	-1.01511	down	0.906066	0.101161	normal	0.000207	1.2026	up	0.881785	0.087666	normal	--	--	Molecular Function: zinc ion binding (GO:0008270);; Cellular Component: integral component of membrane (GO:0016021);;	--	--	[O]	Posttranslational modification, protein turnover, chaperones	Ring finger domain;; RING-like zinc finger;; Zinc finger, C3HC4 type (RING finger);; RING-H2 zinc finger domain;; RING-type zinc-finger;; Zinc finger, C3HC4 type (RING finger);; Anaphase-promoting complex subunit 11 RING-H2 finger	NEP1-interacting protein 1 OS=Arabidopsis thaliana OX=3702 GN=NIP1 PE=1 SV=2	O	Posttranslational modification, protein turnover, chaperones	PREDICTED: NEP1-interacting protein-like 1 [Nicotiana attenuata]	molecular function: binding (GO:0005488);; cellular component: membrane (GO:0016020);; cellular component: membrane part (GO:0044425)
Niben101Scf00436g00003	Niben101Scf00436g00003	0.957077	0.827629	0.548009	1.11126	4.56049	1.2753	0.266317	0.219542	0.884502	0.345809	0.705773	0.382125	0.251082	-0.57569	normal	0.011808	-1.23992	down	0.604322	0.276041	normal	0.003832	1.40497	up	--	--	--	--	--	Cellular Component: chromosome, centromeric region (GO:0000775);; Cellular Component: nucleus (GO:0005634);; Biological Process: meiotic chromosome segregation (GO:0045132);;	--	--	--	--	Shugoshin C terminus	SHUGOSHIN 2 OS=Arabidopsis thaliana OX=3702 GN=SGO2 PE=2 SV=1	S	Function unknown	PREDICTED: coiled-coil domain-containing protein 18 [Nicotiana sylvestris]	cellular component: cell (GO:0005623);; cellular component: organelle (GO:0043226);; cellular component: organelle part (GO:0044422);; cellular component: cell part (GO:0044464);; biological process: reproduction (GO:0000003);; biological process: cellular process (GO:0009987);; biological process: reproductive process (GO:0022414);; biological process: single-organism process (GO:0044699)
Niben101Scf00436g04003	Niben101Scf00436g04003	0.182315	0.826662	0.045451	1.06313	9.84663	1.03464	0	0	0.423667	0.058773	0.119195	0.103719	--	--	--	0.46935	-0.29324	normal	--	--	--	2.59e-07	2.74391	up	--	--	--	[G]	Carbohydrate transport and metabolism	Cellular Component: integral component of plasma membrane (GO:0005887);; Biological Process: water transport (GO:0006833);; Cellular Component: plant-type vacuole membrane (GO:0009705);; Biological Process: cellular water homeostasis (GO:0009992);; Molecular Function: water channel activity (GO:0015250);; Molecular Function: glycerol channel activity (GO:0015254);; Biological Process: glycerol tr…	K09873|5.78944e-148|sly:778315|K09873 aquaporin TIP | (RefSeq) aquaporin-like	--	[G]	Carbohydrate transport and metabolism	Major intrinsic protein	Aquaporin TIP1-1 OS=Arabidopsis thaliana OX=3702 GN=TIP1-1 PE=1 SV=1	G	Carbohydrate transport and metabolism	PREDICTED: probable aquaporin TIP1-1 [Nicotiana tomentosiformis]	cellular component: cell (GO:0005623);; cellular component: membrane (GO:0016020);; cellular component: membrane part (GO:0044425);; cellular component: cell part (GO:0044464);; biological process: single-organism process (GO:0044699);; biological process: localization (GO:0051179);; cellular component: organelle (GO:0043226);; cellular component: organelle part (GO:0044422);; biological process:…
Niben101Scf00436g05003	Niben101Scf00436g05003	4.389	6.17117	4.79114	84.6548	56.8145	59.9099	19.2772	52.3947	46.1299	5.63049	4.58073	5.25049	1.57e-15	2.19024	up	0.179685	-0.59067	normal	0.927523	-0.0708	normal	4.51e-42	3.10687	up	9.65e-16	2.19455	up	[P]	Inorganic ion transport and metabolism	Molecular Function: peroxidase activity (GO:0004601);; Molecular Function: superoxide dismutase activity (GO:0004784);; Molecular Function: copper ion binding (GO:0005507);; Molecular Function: zinc ion binding (GO:0008270);; Cellular Component: chloroplast stroma (GO:0009570);; Cellular Component: thylakoid (GO:0009579);; Biological Process: removal of superoxide radicals (GO:0019430);; Cellular…	K04565|6.10787e-99|spen:107004942|K04565 superoxide dismutase, Cu-Zn family [EC:1.15.1.1] | (RefSeq) superoxide dismutase [Cu-Zn], chloroplastic	Peroxisome (ko04146)	[P]	Inorganic ion transport and metabolism	Copper/zinc superoxide dismutase (SODC)	Superoxide dismutase [Cu-Zn], chloroplastic OS=Petunia hybrida OX=4102 GN=SODCP PE=2 SV=1	P	Inorganic ion transport and metabolism	PREDICTED: superoxide dismutase [Cu-Zn], chloroplastic [Nicotiana tabacum]	biological process: metabolic process (GO:0008152);; biological process: cellular process (GO:0009987);; biological process: single-organism process (GO:0044699);; biological process: response to stimulus (GO:0050896);; biological process: detoxification (GO:0098754);; molecular function: catalytic activity (GO:0003824);; molecular function: antioxidant activity (GO:0016209);; molecular function:…
Niben101Scf00439g06003	Niben101Scf00439g06003	3.56515	2.92279	3.83734	4.03684	3.48634	4.08654	14.1736	7.40092	8.13147	2.50391	3.77433	2.44913	4.68e-05	1.09272	up	2.44e-05	1.24327	up	0.841214	0.129628	normal	0.987108	-0.0066	normal	1.08e-06	1.26494	up	--	--	--	--	--	[L]	Replication, recombination and repair	DDE superfamily endonuclease	Protein ALP1-like OS=Arabidopsis thaliana OX=3702 GN=At3g55350 PE=2 SV=1	S	Function unknown	PREDICTED: uncharacterized protein LOC104114070 [Nicotiana tomentosiformis]	--
Niben101Scf00442g04002	Niben101Scf00442g04002	0.162049	0.663841	0.455071	1.76744	3.30605	0.613003	0.480961	0.617438	0.364431	0.255018	0.460523	0.130086	--	--	--	0.018428	-1.15069	down	--	--	--	0.000954	1.67088	up	--	--	--	--	--	--	--	--	--	--	Purine nucleobase transmembrane transport	Purine permease 1 OS=Arabidopsis thaliana OX=3702 GN=PUP1 PE=1 SV=1	--	--	PREDICTED: purine permease 1-like [Nicotiana sylvestris]	--
Niben101Scf00444g01008	Niben101Scf00444g01008	1.81968	2.22695	1.77836	1.43841	1.53622	1.08244	1.2884	1.22804	1.5393	2.03947	2.44604	2.0632	0.018552	-0.6721	normal	0.934294	0.057019	normal	0.738208	-0.18482	normal	7.92e-05	-1.05289	down	0.000119	-0.93483	normal	[Z]	Cytoskeleton	Molecular Function: ATP binding (GO:0005524);; Cellular Component: cytoplasm (GO:0005737);; Cellular Component: cytoskeleton (GO:0005856);;	K10355|0|sot:102593904|K10355 actin, other eukaryote | (RefSeq) Pot82, actin; actin-82	--	[Z]	Cytoskeleton	Actin	Actin OS=Nicotiana tabacum OX=4097 PE=3 SV=1	Z	Cytoskeleton	PREDICTED: actin-like [Nicotiana sylvestris]	molecular function: binding (GO:0005488);; cellular component: cell (GO:0005623);; cellular component: cell part (GO:0044464);; cellular component: organelle (GO:0043226)
Niben101Scf00446g02007	Niben101Scf00446g02007	0.553616	0.915973	0.531127	1.10165	3.37283	0.761314	0.088887	0.190574	0.851064	0.341005	0.369033	0.298686	0.337725	-0.50911	normal	0.050055	-1.03634	normal	0.367377	0.390409	normal	0.001991	1.47625	up	--	--	--	[R]	General function prediction only	Biological Process: double-strand break repair via homologous recombination (GO:0000724);; Cellular Component: nucleus (GO:0005634);; Biological Process: nucleosome assembly (GO:0006334);; Biological Process: cell proliferation (GO:0008283);; Biological Process: pollen development (GO:0009555);; Biological Process: meristem structural organization (GO:0009933);; Biological Process: trichome diffe…	K10751|0|spen:107003173|K10751 chromatin assembly factor 1 subunit B | (RefSeq) chromatin assembly factor 1 subunit FAS2	--	[BL]	Chromatin structure and dynamics;; Replication, recombination and repair	WD domain, G-beta repeat;; Anaphase-promoting complex subunit 4 WD40 domain	Chromatin assembly factor 1 subunit FAS2 OS=Arabidopsis thaliana OX=3702 GN=FAS2 PE=1 SV=1	S	Function unknown	PREDICTED: chromatin assembly factor 1 subunit FAS2 [Nicotiana attenuata]	biological process: metabolic process (GO:0008152);; biological process: cellular process (GO:0009987);; biological process: response to stimulus (GO:0050896);; cellular component: cell (GO:0005623);; cellular component: organelle (GO:0043226);; cellular component: cell part (GO:0044464);; biological process: cellular component organization or biogenesis (GO:0071840);; biological process: single-…
Niben101Scf00447g00019	Niben101Scf00447g00019	1.30252	1.03307	0.842269	0.528442	0.445745	0.602626	1.32667	1.07385	1.00835	0.972328	1.48374	0.879542	0.835847	-0.11609	normal	0.00701	0.974378	normal	0.914654	-0.09143	normal	7.44e-05	-1.33422	down	0.528146	-0.25856	normal	--	--	--	--	--	--	--	BAG domain	BAG family molecular chaperone regulator 6 OS=Arabidopsis thaliana OX=3702 GN=BAG6 PE=1 SV=1	S	Function unknown	PREDICTED: BAG family molecular chaperone regulator 6 [Nicotiana sylvestris]	--
Niben101Scf00448g07005	Niben101Scf00448g07005	4.62258	1.79983	1.37969	1.17291	1.01768	1.71584	1.32958	0.576552	1.01635	1.37643	1.23523	0.525871	0.005474	-1.08252	down	0.701598	-0.25804	normal	0.151587	0.519563	normal	0.875164	-0.10106	normal	0.555438	-0.31938	normal	[T]	Signal transduction mechanisms	Molecular Function: signal transducer, downstream of receptor, with serine/threonine kinase activity (GO:0004702);; Molecular Function: ATP binding (GO:0005524);; Cellular Component: cytoplasm (GO:0005737);; Biological Process: protein phosphorylation (GO:0006468);;	--	--	[T]	Signal transduction mechanisms	Protein kinase domain;; Protein tyrosine kinase	Mitogen-activated protein kinase kinase kinase 18 OS=Arabidopsis thaliana OX=3702 GN=MAPKKK18 PE=1 SV=1	T	Signal transduction mechanisms	PREDICTED: mitogen-activated protein kinase kinase kinase A-like [Nicotiana attenuata]	biological process: metabolic process (GO:0008152);; biological process: cellular process (GO:0009987);; biological process: signaling (GO:0023052);; biological process: single-organism process (GO:0044699);; biological process: response to stimulus (GO:0050896);; biological process: biological regulation (GO:0065007);; molecular function: catalytic activity (GO:0003824);; molecular function: sig…
Niben101Scf00448g18001	Niben101Scf00448g18001	0.266515	0.869159	0.411127	0.90866	1.35522	0.783633	0.309253	1.35574	0.629451	0.241225	0.345332	0.259932	0.828481	0.162342	normal	0.782583	-0.21773	normal	--	--	--	0.008122	1.15638	up	--	--	--	--	--	Biological Process: phenylpropanoid biosynthetic process (GO:0009699);; Molecular Function: guiding stereospecific synthesis activity (GO:0042349);; Biological Process: regulation of catalytic activity (GO:0050790);;	--	--	--	--	Dirigent-like protein	Dirigent protein 23 OS=Arabidopsis thaliana OX=3702 GN=DIR23 PE=2 SV=1	S	Function unknown	PREDICTED: dirigent protein 22-like [Nicotiana tomentosiformis]	biological process: metabolic process (GO:0008152);; biological process: cellular process (GO:0009987);; biological process: single-organism process (GO:0044699);; biological process: biological regulation (GO:0065007);; molecular function: molecular function regulator (GO:0098772)
Niben101Scf00449g00004	Niben101Scf00449g00004	3.65272	3.50086	6.31506	2.30211	1.62891	1.39721	7.90602	4.51757	3.24028	5.11545	5.81013	5.14606	0.967013	-0.03015	normal	0.000612	1.28157	up	0.647344	-0.23164	normal	1.62e-13	-1.88527	down	0.399929	-0.32165	normal	[I]	Lipid transport and metabolism	Biological Process: lipid metabolic process (GO:0006629);; Cellular Component: membrane (GO:0016020);; Molecular Function: lipase activity (GO:0016298);;	K01054|0|spen:107018363|K01054 acylglycerol lipase [EC:3.1.1.23] | (RefSeq) caffeoylshikimate esterase-like	--	[I]	Lipid transport and metabolism	Serine aminopeptidase, S33;; alpha/beta hydrolase fold;; Alpha/beta hydrolase family;; Prolyl oligopeptidase family;; Dienelactone hydrolase family	Caffeoylshikimate esterase OS=Arabidopsis thaliana OX=3702 GN=CSE PE=1 SV=1	I	Lipid transport and metabolism	PREDICTED: caffeoylshikimate esterase-like [Nicotiana attenuata]	biological process: metabolic process (GO:0008152);; biological process: single-organism process (GO:0044699);; cellular component: membrane (GO:0016020);; molecular function: catalytic activity (GO:0003824)
Niben101Scf00449g06008	Niben101Scf00449g06008	37.9916	6.64057	7.85814	14.8647	15.5461	93.8865	104.924	106.281	60.9178	33.1624	35.8183	29.3157	0.067381	0.809715	normal	0.452106	0.49298	normal	0.689813	-0.18735	normal	0.948459	-0.06146	normal	1.17e-06	1.04501	up	[O]	Posttranslational modification, protein turnover, chaperones	Molecular Function: ATP binding (GO:0005524);;	K03283|0|jcu:105647830|K03283 heat shock 70kDa protein 1/8 | (RefSeq) probable mediator of RNA polymerase II transcription subunit 37c	Spliceosome (ko03040);; Protein processing in endoplasmic reticulum (ko04141);; Endocytosis (ko04144)	[O]	Posttranslational modification, protein turnover, chaperones	Hsp70 protein;; MreB/Mbl protein	Probable mediator of RNA polymerase II transcription subunit 37e OS=Arabidopsis thaliana OX=3702 GN=MED37E PE=1 SV=3	O	Posttranslational modification, protein turnover, chaperones	PREDICTED: heat shock cognate 70 kDa protein 2-like [Nicotiana attenuata]	molecular function: binding (GO:0005488)
Niben101Scf00453g03019	Niben101Scf00453g03019	1.7814	3.42445	1.32005	3.85009	5.93349	4.03873	2.6432	2.47784	3.43261	1.46425	1.75567	1.54934	0.849337	0.117413	normal	0.086811	-0.55111	normal	0.721873	0.217872	normal	2.17e-05	1.03485	up	0.102665	0.455577	normal	--	--	Molecular Function: calmodulin binding (GO:0005516);;	--	--	--	--	Protein of unknown function (DUF4005)	--	S	Function unknown	PREDICTED: protein IQ-DOMAIN 14-like [Nicotiana tomentosiformis]	molecular function: binding (GO:0005488)
Niben101Scf00453g07011	Niben101Scf00453g07011	51.9784	58.4233	60.7012	25.4496	20.2542	14.4058	29.307	28.6915	26.939	77.9415	66.0572	72.8152	3.24e-18	-1.20877	down	0.112504	0.509908	normal	0.078019	-0.37626	normal	3.42e-20	-2.16063	down	6.53e-29	-1.63311	down	--	--	Molecular Function: structural constituent of ribosome (GO:0003735);; Biological Process: translation (GO:0006412);; Biological Process: transport (GO:0006810);; Cellular Component: integral component of membrane (GO:0016021);;	K15109|0|sot:102588587|K15109 solute carrier family 25 (mitochondrial carnitine/acylcarnitine transporter), member 20/29 | (RefSeq) mitochondrial carnitine/acylcarnitine carrier-like protein	--	[C]	Energy production and conversion	Mitochondrial carrier protein	Mitochondrial carnitine/acylcarnitine carrier-like protein OS=Arabidopsis thaliana OX=3702 GN=BOU PE=1 SV=1	S	Function unknown	PREDICTED: mitochondrial carnitine/acylcarnitine carrier-like protein [Nicotiana sylvestris]	molecular function: structural molecule activity (GO:0005198);; biological process: metabolic process (GO:0008152);; biological process: cellular process (GO:0009987);; biological process: localization (GO:0051179);; cellular component: membrane (GO:0016020);; cellular component: membrane part (GO:0044425)
Niben101Scf00454g03001	Niben101Scf00454g03001	17.6064	7.13245	31.1767	13.0003	23.2718	10.4906	100.661	60.4051	79.2856	11.1976	20.8036	10.5854	0.023875	0.971646	normal	3.7e-14	2.10675	up	0.904338	0.089282	normal	0.516178	-0.26638	normal	1.61e-17	1.95789	up	--	--	Biological Process: transcription, DNA-templated (GO:0006351);; Biological Process: regulation of cellular process (GO:0050794);;	K09286|2.01436e-78|sot:102587899|K09286 EREBP-like factor | (RefSeq) ERF3; ethylene-responsive transcription factor 5-like	--	--	--	AP2 domain	Ethylene-responsive transcription factor 5 OS=Nicotiana tabacum OX=4097 GN=ERF5 PE=2 SV=1	S	Function unknown	PREDICTED: ethylene-responsive transcription factor 5-like [Nicotiana tabacum]	biological process: metabolic process (GO:0008152);; biological process: cellular process (GO:0009987);; biological process: biological regulation (GO:0065007)
Niben101Scf00454g04003	Niben101Scf00454g04003	8.07862	6.10374	16.6146	9.47325	13.0463	12.9818	42.0728	20.3961	26.9301	4.22255	17.4959	8.36508	0.107145	0.741356	normal	2.36e-05	1.23485	up	0.998179	0.001776	normal	0.794337	-0.14151	normal	0.1217	0.746452	normal	--	--	Molecular Function: DNA binding (GO:0003677);; Molecular Function: transcription factor activity, sequence-specific DNA binding (GO:0003700);; Cellular Component: nucleus (GO:0005634);; Biological Process: regulation of transcription, DNA-templated (GO:0006355);; Biological Process: defense response (GO:0006952);; Biological Process: ethylene-activated signaling pathway (GO:0009873);;	--	--	--	--	AP2 domain	Ethylene-responsive transcription factor 1 OS=Nicotiana tabacum OX=4097 GN=ERF1 PE=2 SV=1	K	Transcription	ethylene response factor, partial [Nicotiana umbratica]	molecular function: binding (GO:0005488);; biological process: biological regulation (GO:0065007);; molecular function: nucleic acid binding transcription factor activity (GO:0001071);; cellular component: cell (GO:0005623);; cellular component: organelle (GO:0043226);; cellular component: cell part (GO:0044464);; biological process: response to stimulus (GO:0050896);; biological process: cellula…
Niben101Scf00456g00003	Niben101Scf00456g00003	0.097586	0.303172	0.300548	1.17227	1.43537	1.74407	0.404927	1.16294	0.953739	0.131073	0.506356	0.092438	--	--	--	0.314075	-0.53115	normal	--	--	--	0.000416	1.65875	up	--	--	--	[G]	Carbohydrate transport and metabolism	Biological Process: carbohydrate metabolic process (GO:0005975);; Molecular Function: beta-glucosidase activity (GO:0008422);; Biological Process: glycosyl compound metabolic process (GO:1901657);;	K05350|0|sot:102579818|K05350 beta-glucosidase [EC:3.2.1.21] | (RefSeq) beta-glucosidase 44-like	Cyanoamino acid metabolism (ko00460);; Starch and sucrose metabolism (ko00500);; Phenylpropanoid biosynthesis (ko00940)	[G]	Carbohydrate transport and metabolism	Glycosyl hydrolase family 1	Beta-glucosidase 44 OS=Arabidopsis thaliana OX=3702 GN=BGLU44 PE=2 SV=1	G	Carbohydrate transport and metabolism	PREDICTED: beta-glucosidase 44-like [Nicotiana tabacum]	biological process: metabolic process (GO:0008152);; molecular function: catalytic activity (GO:0003824);; biological process: single-organism process (GO:0044699)
Niben101Scf00456g00010	Niben101Scf00456g00010	0.885323	0.535802	0.328092	0.929826	7.01596	1.35189	0.670065	0.410861	0.980027	0.202491	0.829213	0.402713	0.996263	-0.00406	normal	0.023793	-1.14395	down	0.937131	0.069807	normal	0.068704	1.13814	normal	0.864604	0.119362	normal	[G]	Carbohydrate transport and metabolism	Biological Process: carbohydrate metabolic process (GO:0005975);; Molecular Function: beta-glucosidase activity (GO:0008422);; Biological Process: glycosyl compound metabolic process (GO:1901657);;	K05350|0|sot:102579818|K05350 beta-glucosidase [EC:3.2.1.21] | (RefSeq) beta-glucosidase 44-like	Cyanoamino acid metabolism (ko00460);; Starch and sucrose metabolism (ko00500);; Phenylpropanoid biosynthesis (ko00940)	[G]	Carbohydrate transport and metabolism	Glycosyl hydrolase family 1	Beta-glucosidase 44 OS=Arabidopsis thaliana OX=3702 GN=BGLU44 PE=2 SV=1	G	Carbohydrate transport and metabolism	PREDICTED: beta-glucosidase 44-like [Nicotiana attenuata]	biological process: metabolic process (GO:0008152);; molecular function: catalytic activity (GO:0003824);; biological process: single-organism process (GO:0044699)
Niben101Scf00457g09007	Niben101Scf00457g09007	0.664006	0.852164	0.53331	0.984427	3.92203	0.86861	0.217844	0.321415	0.596575	0.515063	0.782399	0.37791	0.092197	-0.72816	normal	0.005247	-1.32628	down	0.900675	0.105759	normal	0.044732	1.02421	up	0.1848	-0.6159	normal	[G]	Carbohydrate transport and metabolism	Cellular Component: integral component of membrane (GO:0016021);; Molecular Function: pectate lyase activity (GO:0030570);; Biological Process: pectin catabolic process (GO:0045490);; Molecular Function: metal ion binding (GO:0046872);;	K01728|0|sot:102590902|K01728 pectate lyase [EC:4.2.2.2] | (RefSeq) probable pectate lyase 12	Pentose and glucuronate interconversions (ko00040)	--	--	Pectate lyase;; Right handed beta helix region	Probable pectate lyase 12 OS=Arabidopsis thaliana OX=3702 GN=At3g53190 PE=2 SV=2	G	Carbohydrate transport and metabolism	PREDICTED: probable pectate lyase 12 [Nicotiana tabacum]	cellular component: membrane (GO:0016020);; cellular component: membrane part (GO:0044425);; molecular function: catalytic activity (GO:0003824);; biological process: metabolic process (GO:0008152);; molecular function: binding (GO:0005488)
Niben101Scf00458g04002	Niben101Scf00458g04002	62.5992	60.9113	53.8587	285.964	295.235	400.198	141.5	340.775	316.671	58.7095	62.1308	62.0287	3.7e-11	1.65399	up	0.725185	-0.19371	normal	0.718033	-0.11579	normal	5e-32	1.93763	up	1.58e-10	1.58292	up	--	--	Cellular Component: cytoplasm (GO:0005737);;	--	--	[DZ]	Cell cycle control, cell division, chromosome partitioning;; Cytoskeleton	Translationally controlled tumour protein;; Translationally controlled tumour protein	Translationally-controlled tumor protein homolog OS=Solanum tuberosum OX=4113 GN=TCTP PE=2 SV=2	S	Function unknown	PREDICTED: translationally-controlled tumor protein homolog [Nicotiana sylvestris]	cellular component: cell (GO:0005623);; cellular component: cell part (GO:0044464)
Niben101Scf00461g01007	Niben101Scf00461g01007	0.849905	1.03813	1.1482	0.653062	0.216948	0.688652	1.03178	1.21769	0.926771	0.941847	1.11061	1.11229	0.75049	-0.15765	normal	0.104789	0.788955	normal	0.901218	-0.09686	normal	0.002993	-1.21623	down	0.369225	-0.30285	normal	--	--	--	--	--	[P]	Inorganic ion transport and metabolism	HCO3- transporter family	Boron transporter 4 OS=Arabidopsis thaliana OX=3702 GN=BOR4 PE=2 SV=1	U	Intracellular trafficking, secretion, and vesicular transport	PREDICTED: boron transporter 4-like isoform X2 [Nicotiana tabacum]	--
Niben101Scf00461g07003	Niben101Scf00461g07003	7.01475	7.47234	9.48116	5.46137	6.33546	5.28153	15.8114	11.4886	9.91842	9.91494	9.05286	7.57678	0.340793	0.33423	normal	6.27e-05	1.07742	up	0.761578	-0.16922	normal	7.67e-06	-1.02444	down	0.731927	0.131456	normal	--	--	--	--	--	--	--	Cotton fibre expressed protein;; Domain of unknown function (DUF4408)	--	S	Function unknown	PREDICTED: uncharacterized protein LOC104247231 [Nicotiana sylvestris]	--
Niben101Scf00463g00016	Niben101Scf00463g00016	50.8507	47.3752	53.4985	36.7061	28.7841	33.8455	45.1402	41.8942	35.742	53.1266	52.2529	54.4184	0.001803	-0.52778	normal	0.2004	0.350629	normal	0.65356	-0.1415	normal	1.25e-09	-1.08253	down	5.23e-06	-0.69681	normal	[O]	Posttranslational modification, protein turnover, chaperones	Molecular Function: ATP-dependent peptidase activity (GO:0004176);; Molecular Function: metalloendopeptidase activity (GO:0004222);; Molecular Function: ATP binding (GO:0005524);; Cellular Component: mitochondrion (GO:0005739);; Biological Process: proteolysis (GO:0006508);; Cellular Component: chloroplast thylakoid membrane (GO:0009535);; Cellular Component: chloroplast envelope (GO:0009941);; B…	K03798|0|sly:101266739|K03798 cell division protease FtsH [EC:3.4.24.-] | (RefSeq) ATP-dependent zinc metalloprotease FTSH 2, chloroplastic	--	[O]	Posttranslational modification, protein turnover, chaperones	Peptidase family M41;; ATPase family associated with various cellular activities (AAA);; TIP49 C-terminus;; Holliday junction DNA helicase ruvB N-terminus	ATP-dependent zinc metalloprotease FTSH 2, chloroplastic OS=Arabidopsis thaliana OX=3702 GN=FTSH2 PE=1 SV=1	O	Posttranslational modification, protein turnover, chaperones	PREDICTED: ATP-dependent zinc metalloprotease FTSH 2, chloroplastic [Nicotiana attenuata]	biological process: metabolic process (GO:0008152);; molecular function: catalytic activity (GO:0003824);; molecular function: binding (GO:0005488);; cellular component: cell (GO:0005623);; cellular component: organelle (GO:0043226);; cellular component: cell part (GO:0044464);; cellular component: membrane (GO:0016020);; cellular component: organelle part (GO:0044422);; biological process: cellu…
Niben101Scf00466g00012	Niben101Scf00466g00012	1369.99	1322.13	1460.62	1168.92	766.262	909.55	1459.84	1566.29	1412.53	1939.38	1450.47	1933.78	0.463936	-0.14746	normal	0.010982	0.651955	normal	0.10515	-0.38574	normal	1.54e-07	-1.26735	down	0.002654	-0.583	normal	[G]	Carbohydrate transport and metabolism	Molecular Function: fructose-bisphosphate aldolase activity (GO:0004332);; Biological Process: glycolytic process (GO:0006096);;	K01623|0|spen:107001184|K01623 fructose-bisphosphate aldolase, class I [EC:4.1.2.13] | (RefSeq) fructose-bisphosphate aldolase 1, chloroplastic	Glycolysis / Gluconeogenesis (ko00010);; Pentose phosphate pathway (ko00030);; Fructose and mannose metabolism (ko00051);; Carbon fixation in photosynthetic organisms (ko00710);; Carbon metabolism (ko01200);; Biosynthesis of amino acids (ko01230)	[G]	Carbohydrate transport and metabolism	Fructose-bisphosphate aldolase class-I	Fructose-bisphosphate aldolase 1, chloroplastic OS=Arabidopsis thaliana OX=3702 GN=FBA1 PE=1 SV=2	G	Carbohydrate transport and metabolism	PREDICTED: fructose-bisphosphate aldolase 1, chloroplastic-like [Nicotiana sylvestris]	molecular function: catalytic activity (GO:0003824);; biological process: metabolic process (GO:0008152);; biological process: cellular process (GO:0009987);; biological process: single-organism process (GO:0044699)
Niben101Scf00471g00013	Niben101Scf00471g00013	30.6217	36.5032	37.9096	25.0767	23.3724	18.5265	22.6581	24.5069	23.2209	36.0483	32.5028	34.8199	3.6e-07	-0.78976	normal	0.703109	0.132008	normal	0.930089	-0.0509	normal	1.01e-07	-1.02528	down	8.24e-10	-0.87048	normal	[K]	Transcription	Molecular Function: plastid sigma factor activity (GO:0001053);; Molecular Function: DNA binding (GO:0003677);; Molecular Function: transcription factor activity, sequence-specific DNA binding (GO:0003700);; Biological Process: DNA-templated transcription, initiation (GO:0006352);; Biological Process: regulation of transcription, DNA-templated (GO:0006355);; Biological Process: tRNA metabolic pro…	--	--	--	--	Sigma-70, region 4;; Sigma-70 region 3;; Sigma-70 region 2;; Sigma-70 factor, region 1.2	RNA polymerase sigma factor sigB OS=Arabidopsis thaliana OX=3702 GN=SIGB PE=2 SV=2	K	Transcription	PREDICTED: RNA polymerase sigma factor sigB-like [Nicotiana attenuata]	biological process: biological regulation (GO:0065007);; molecular function: transcription factor activity, protein binding (GO:0000988);; molecular function: binding (GO:0005488);; molecular function: nucleic acid binding transcription factor activity (GO:0001071);; biological process: metabolic process (GO:0008152);; biological process: cellular process (GO:0009987);; cellular component: cell (…
Niben101Scf00472g05017	Niben101Scf00472g05017	29.693	27.2392	28.1609	20.8503	18.8881	25.1274	30.7128	27.286	23.1478	32.2225	36.1107	33.7756	0.142275	-0.2992	normal	0.179254	0.37088	normal	0.04692	-0.31758	normal	1.22e-10	-1.05742	down	3.44e-05	-0.64499	normal	[T]	Signal transduction mechanisms	Molecular Function: voltage-gated potassium channel activity (GO:0005249);; Cellular Component: integral component of plasma membrane (GO:0005887);; Biological Process: regulation of membrane potential (GO:0042391);; Biological Process: potassium ion transmembrane transport (GO:0071805);;	--	--	[PT]	Inorganic ion transport and metabolism;; Signal transduction mechanisms	Ion transport protein;; KHA, dimerisation domain of potassium ion channel;; Ion channel	Potassium channel AKT2/3 OS=Arabidopsis thaliana OX=3702 GN=AKT2 PE=1 SV=1	U	Intracellular trafficking, secretion, and vesicular transport	PREDICTED: potassium channel AKT2/3-like [Nicotiana tabacum]	biological process: cellular process (GO:0009987);; biological process: single-organism process (GO:0044699);; biological process: localization (GO:0051179);; biological process: biological regulation (GO:0065007);; molecular function: transporter activity (GO:0005215);; cellular component: cell (GO:0005623);; cellular component: membrane (GO:0016020);; cellular component: membrane part (GO:00444…
Niben101Scf00472g08006	Niben101Scf00472g08006	1.84361	2.70896	1.17504	2.87448	10.5521	3.37321	1.4361	1.93324	3.45837	1.69251	1.44297	1.55772	0.987885	0.01113	normal	0.095355	-0.83784	normal	0.883328	0.118562	normal	0.006046	1.15456	up	0.756293	0.159704	normal	[Q]	Secondary metabolites biosynthesis, transport and catabolism	--	--	--	--	--	Glyoxalase/Bleomycin resistance protein/Dioxygenase superfamily;; Glyoxalase-like domain	--	S	Function unknown	PREDICTED: uncharacterized protein LOC109231139 [Nicotiana attenuata]	--
Niben101Scf00474g05001	Niben101Scf00474g05001	40.7296	36.3185	19.5164	40.1897	72.9681	51.0689	49.3698	47.3276	64.1136	22.0564	20.717	15.2597	0.173632	0.436515	normal	0.932621	0.04832	normal	0.158363	0.464062	normal	5.85e-05	0.997457	normal	2.06e-07	1.04938	up	--	--	--	--	--	--	--	--	--	--	--	--	--
Niben101Scf00474g11008	Niben101Scf00474g11008	3.29219	4.0032	2.28456	7.25648	7.51615	5.28067	2.40449	1.70223	3.96213	2.71116	3.04017	2.36297	0.362372	-0.39209	normal	0.002657	-1.04548	down	0.876334	0.11313	normal	0.00072	0.830542	normal	0.462499	-0.29797	normal	--	--	Molecular Function: transcription factor activity, sequence-specific DNA binding (GO:0003700);; Cellular Component: nucleus (GO:0005634);; Biological Process: regulation of transcription, DNA-templated (GO:0006355);; Molecular Function: sequence-specific DNA binding (GO:0043565);;	K09338|1.22985e-119|sot:102587462|K09338 homeobox-leucine zipper protein | (RefSeq) homeobox-leucine zipper protein ATHB-6-like	--	[K]	Transcription	Homeobox domain;; Homeobox associated leucine zipper	Homeobox-leucine zipper protein ATHB-16 OS=Arabidopsis thaliana OX=3702 GN=ATHB-16 PE=2 SV=2	K	Transcription	PREDICTED: homeobox-leucine zipper protein ATHB-6-like [Nicotiana tabacum]	biological process: biological regulation (GO:0065007);; molecular function: nucleic acid binding transcription factor activity (GO:0001071);; cellular component: cell (GO:0005623);; cellular component: organelle (GO:0043226);; cellular component: cell part (GO:0044464);; molecular function: binding (GO:0005488)
Niben101Scf00479g02013	Niben101Scf00479g02013	1.01221	1.25223	0.740681	1.08868	0.469203	0.600358	0.764217	0.659845	0.746095	1.88324	1.34104	1.12411	--	--	--	--	--	--	0.531548	-0.31113	normal	0.008739	-1.16778	down	0.003821	-1.03331	down	--	--	Molecular Function: kinase activity (GO:0016301);; Biological Process: phosphorylation (GO:0016310);;	--	--	--	--	bHLH-MYC and R2R3-MYB transcription factors N-terminal	Protein RICE SALT SENSITIVE 3 OS=Oryza sativa subsp. japonica OX=39947 GN=RSS3 PE=1 SV=1	S	Function unknown	PREDICTED: transcription factor LHW-like [Nicotiana sylvestris]	molecular function: catalytic activity (GO:0003824);; biological process: metabolic process (GO:0008152);; biological process: cellular process (GO:0009987)
Niben101Scf00480g00002	Niben101Scf00480g00002	139.942	146.94	154.333	111.532	80.6341	82.0562	103.089	108.957	105.161	178.162	152.811	163.362	3.2e-08	-0.70271	normal	0.428129	0.25436	normal	0.41124	-0.2222	normal	8.38e-09	-1.22675	down	3.86e-11	-0.95341	normal	[PQ]	Inorganic ion transport and metabolism;; Secondary metabolites biosynthesis, transport and catabolism	Molecular Function: nitrite reductase [NAD(P)H] activity (GO:0008942);; Cellular Component: chloroplast thylakoid membrane (GO:0009535);; Cellular Component: chloroplast envelope (GO:0009941);; Biological Process: nitrate assimilation (GO:0042128);; Molecular Function: 2 iron, 2 sulfur cluster binding (GO:0051537);; Biological Process: oxidation-reduction process (GO:0055114);;	--	--	--	--	Rieske-like [2Fe-2S] domain	--	C	Energy production and conversion	PREDICTED: uncharacterized protein LOC104218509 [Nicotiana sylvestris]	biological process: metabolic process (GO:0008152);; biological process: single-organism process (GO:0044699);; molecular function: catalytic activity (GO:0003824);; cellular component: cell (GO:0005623);; cellular component: membrane (GO:0016020);; cellular component: organelle (GO:0043226);; cellular component: organelle part (GO:0044422);; cellular component: cell part (GO:0044464);; biologica…
Niben101Scf00480g01009	Niben101Scf00480g01009	22.4373	20.5154	29.9706	14.8709	10.6534	12.5063	34.8257	31.1296	20.5123	25.9182	24.5089	37.5122	0.993003	-0.00497	normal	4.02e-05	1.1192	up	0.479453	-0.27564	normal	2.07e-10	-1.55083	down	0.281448	-0.3353	normal	--	--	--	--	--	--	--	PDDEXK-like family of unknown function	--	S	Function unknown	PREDICTED: uncharacterized protein LOC104209980 [Nicotiana sylvestris]	--
Niben101Scf00482g07005	Niben101Scf00482g07005	2.02969	0.65206	2.34463	12.0875	7.18569	14.8709	5.31426	6.09304	10.4816	3.56431	4.576	1.51825	0.004751	1.12706	up	0.430125	-0.44034	normal	--	--	--	0.009858	1.15388	up	0.197023	0.594483	normal	--	--	--	--	--	--	--	--	--	--	--	hypothetical protein A4A49_06179 [Nicotiana attenuata]	--
Niben101Scf00482g07009	Niben101Scf00482g07009	15.2439	11.2059	9.59862	7.4342	3.39675	4.26145	17.2078	11.4184	7.3901	19.7164	15.9958	15.2017	0.675488	-0.20156	normal	0.010355	1.033	up	0.061931	-0.47744	normal	3.48e-11	-1.98402	down	0.010863	-0.74195	normal	[T]	Signal transduction mechanisms	Molecular Function: protein serine/threonine kinase activity (GO:0004674);; Molecular Function: ATP binding (GO:0005524);; Biological Process: protein phosphorylation (GO:0006468);;	K18873|0|sot:102594996|K18873 pathogen-induced protein kinase | (RefSeq) serine/threonine-protein kinase CDL1	Plant-pathogen interaction (ko04626)	[T]	Signal transduction mechanisms	Protein tyrosine kinase;; Protein kinase domain	Probable serine/threonine-protein kinase PBL5 OS=Arabidopsis thaliana OX=3702 GN=PBL5 PE=2 SV=1	T	Signal transduction mechanisms	PREDICTED: serine/threonine-protein kinase CDL1-like [Nicotiana attenuata]	biological process: metabolic process (GO:0008152);; biological process: cellular process (GO:0009987);; molecular function: catalytic activity (GO:0003824);; molecular function: binding (GO:0005488)
Niben101Scf00484g03011	Niben101Scf00484g03011	12.3954	15.7902	16.884	10.8274	9.28269	7.11703	7.16805	9.95917	9.87627	15.6609	15.0502	13.4993	1.74e-05	-0.90694	normal	0.935063	0.047902	normal	0.952717	-0.04156	normal	9.08e-07	-1.07906	down	2.82e-08	-0.99644	normal	[H]	Coenzyme transport and metabolism	Cellular Component: chloroplast envelope (GO:0009941);; Biological Process: plastoquinone biosynthetic process (GO:0010236);; Molecular Function: homogentisate farnesyltransferase activity (GO:0010355);; Molecular Function: homogentisate geranylgeranyltransferase activity (GO:0010356);; Molecular Function: homogentisate solanesyltransferase activity (GO:0010357);; Cellular Component: integral com…	K12501|0|sot:102594989|K12501 homogentisate solanesyltransferase [EC:2.5.1.117] | (RefSeq) homogentisate solanesyltransferase, chloroplastic	Ubiquinone and other terpenoid-quinone biosynthesis (ko00130)	--	--	UbiA prenyltransferase family	Homogentisate solanesyltransferase, chloroplastic OS=Arabidopsis thaliana OX=3702 GN=HST PE=1 SV=1	H	Coenzyme transport and metabolism	PREDICTED: homogentisate solanesyltransferase, chloroplastic [Nicotiana sylvestris]	cellular component: cell (GO:0005623);; cellular component: organelle (GO:0043226);; cellular component: organelle part (GO:0044422);; cellular component: cell part (GO:0044464);; biological process: metabolic process (GO:0008152);; biological process: cellular process (GO:0009987);; biological process: single-organism process (GO:0044699);; molecular function: catalytic activity (GO:0003824);; c…
Niben101Scf00487g06021	Niben101Scf00487g06021	20.2974	21.0069	24.9016	24.2787	19.961	21.1993	29.1989	33.6955	27.9097	33.1615	31.3773	39.2328	0.441347	0.194301	normal	0.021046	0.51185	normal	0.000386	-0.6344	normal	3.58e-08	-1.06122	down	0.004637	-0.51439	normal	[P]	Inorganic ion transport and metabolism	Molecular Function: DNA binding (GO:0003677);; Molecular Function: copper ion binding (GO:0005507);; Biological Process: regulation of DNA replication (GO:0006275);; Biological Process: DNA packaging (GO:0006323);; Cellular Component: chloroplast envelope (GO:0009941);; Cellular Component: stromule (GO:0010319);; Molecular Function: sulfite reductase activity (GO:0016002);; Cellular Component: me…	K00392|0|spen:107004509|K00392 sulfite reductase (ferredoxin) [EC:1.8.7.1] | (RefSeq) sulfite reductase 1 [ferredoxin], chloroplastic	Sulfur metabolism (ko00920)	[P]	Inorganic ion transport and metabolism	Nitrite and sulphite reductase 4Fe-4S domain;; Nitrite/Sulfite reductase ferredoxin-like half domain	Sulfite reductase 1 [ferredoxin], chloroplastic OS=Nicotiana tabacum OX=4097 GN=SIR1 PE=1 SV=1	C	Energy production and conversion	sulfite reductase [Nicotiana benthamiana]	molecular function: binding (GO:0005488);; biological process: biological regulation (GO:0065007);; biological process: cellular process (GO:0009987);; biological process: cellular component organization or biogenesis (GO:0071840);; cellular component: cell (GO:0005623);; cellular component: organelle (GO:0043226);; cellular component: organelle part (GO:0044422);; cellular component: cell part (…
Niben101Scf00488g01002	Niben101Scf00488g01002	1.72877	1.2615	1.66962	1.26361	0.901957	1.14793	3.15264	2.77704	1.39727	1.86596	1.9633	2.51345	0.471846	0.326711	normal	0.011987	0.979147	normal	0.320878	-0.37631	normal	7.26e-06	-1.2646	down	0.824185	-0.11329	normal	[E]	Amino acid transport and metabolism	Molecular Function: transporter activity (GO:0005215);; Biological Process: transport (GO:0006810);; Cellular Component: integral component of membrane (GO:0016021);;	K14638|0|sly:101258964|K14638 solute carrier family 15 (peptide/histidine transporter), member 3/4 | (RefSeq) protein NRT1/ PTR FAMILY 2.9-like	--	[E]	Amino acid transport and metabolism	POT family	Protein NRT1/ PTR FAMILY 2.11 OS=Arabidopsis thaliana OX=3702 GN=NPF2.11 PE=1 SV=1	E	Amino acid transport and metabolism	PREDICTED: protein NRT1/ PTR FAMILY 2.11-like isoform X1 [Nicotiana attenuata]	molecular function: transporter activity (GO:0005215);; biological process: localization (GO:0051179);; cellular component: membrane (GO:0016020);; cellular component: membrane part (GO:0044425)
Niben101Scf00488g04027	Niben101Scf00488g04027	0.632896	0.566969	1.10097	0.343981	0	0.22762	0.49522	0.491997	0.393548	1.02428	0.752267	0.970128	0.07357	-0.72526	normal	--	--	--	0.795217	-0.17933	normal	0.147115	-0.90417	normal	0.000703	-1.09923	down	[G]	Carbohydrate transport and metabolism	Biological Process: carbohydrate metabolic process (GO:0005975);; Cellular Component: integral component of membrane (GO:0016021);; Molecular Function: oxidoreductase activity, acting on the CH-OH group of donors, quinone or similar compound as acceptor (GO:0016901);; Molecular Function: quinone binding (GO:0048038);; Biological Process: oxidation-reduction process (GO:0055114);;	--	--	--	--	Glucose / Sorbosone dehydrogenase	HIPL1 protein OS=Arabidopsis thaliana OX=3702 GN=HIPL1 PE=1 SV=2	G	Carbohydrate transport and metabolism	PREDICTED: HIPL1 protein-like [Nicotiana attenuata]	biological process: metabolic process (GO:0008152);; cellular component: membrane (GO:0016020);; cellular component: membrane part (GO:0044425);; biological process: single-organism process (GO:0044699);; molecular function: catalytic activity (GO:0003824);; molecular function: binding (GO:0005488)
Niben101Scf00490g01031	Niben101Scf00490g01031	1.0766	1.77333	1.90275	0.892163	0.808068	0.61455	0.945499	1.48651	0.764068	2.43735	1.67956	2.29211	0.189575	-0.58628	normal	--	--	--	0.581386	-0.28701	normal	4.09e-06	-1.66875	down	0.002361	-1.07094	down	--	--	--	--	--	[U]	Intracellular trafficking, secretion, and vesicular transport	Armadillo/beta-catenin-like repeat	Importin subunit alpha-1b OS=Oryza sativa subsp. japonica OX=39947 GN=Os05g0155601 PE=1 SV=2	U	Intracellular trafficking, secretion, and vesicular transport	PREDICTED: importin subunit alpha-4-like isoform X1 [Nicotiana tomentosiformis]	--
Niben101Scf00490g01036	Niben101Scf00490g01036	169.566	166.839	172.276	98.1959	70.2771	74.0339	114.633	100.792	94.6508	167.099	139.172	146.352	2.67e-12	-0.92717	normal	0.187512	0.388553	normal	0.876334	0.075454	normal	2.88e-09	-1.27452	down	1.44e-07	-0.85518	normal	--	--	Cellular Component: integral component of membrane (GO:0016021);;	--	--	--	--	--	PGR5-like protein 1A, chloroplastic OS=Arabidopsis thaliana OX=3702 GN=PGRL1A PE=1 SV=1	S	Function unknown	PREDICTED: PGR5-like protein 1A, chloroplastic [Nicotiana attenuata]	cellular component: membrane (GO:0016020);; cellular component: membrane part (GO:0044425)
Niben101Scf00491g04007	Niben101Scf00491g04007	113.812	104.103	102.068	67.4963	51.584	63.1569	102.689	91.8519	78.5821	121.703	111.501	115.088	0.007704	-0.45255	normal	0.011889	0.608978	normal	0.466565	-0.18907	normal	1.33e-12	-1.32113	down	5.86e-05	-0.66639	normal	[O]	Posttranslational modification, protein turnover, chaperones	Biological Process: protein catabolic process (GO:0030163);;	K06891|9.59829e-94|sot:102601216|K06891 ATP-dependent Clp protease adaptor protein ClpS | (RefSeq) ATP-dependent Clp protease adapter protein CLPS1, chloroplastic	--	--	--	ATP-dependent Clp protease adaptor protein ClpS	ATP-dependent Clp protease adapter protein CLPS1, chloroplastic OS=Arabidopsis thaliana OX=3702 GN=CPLS1 PE=1 SV=1	O	Posttranslational modification, protein turnover, chaperones	PREDICTED: uncharacterized protein LOC104214399 [Nicotiana sylvestris]	biological process: metabolic process (GO:0008152)
Niben101Scf00492g01003	Niben101Scf00492g01003	0.977201	0.952964	1.36546	0.635238	0.420974	0.253529	0.727806	0.564859	0.705629	1.4514	1.51439	1.38794	0.009651	-0.80569	normal	0.356619	0.506072	normal	0.39636	-0.34084	normal	2.5e-08	-1.91113	down	3.06e-08	-1.3105	down	[G]	Carbohydrate transport and metabolism	Molecular Function: UDP-glycosyltransferase activity (GO:0008194);; Biological Process: flavonoid biosynthetic process (GO:0009813);; Molecular Function: transferase activity, transferring hexosyl groups (GO:0016758);; Cellular Component: intracellular membrane-bounded organelle (GO:0043231);; Biological Process: flavonoid glucuronidation (GO:0052696);;	K13495|0|sly:101246295|K13495 cis-zeatin O-glucosyltransferase [EC:2.4.1.215] | (RefSeq) zeatin O-glucosyltransferase-like	Zeatin biosynthesis (ko00908)	[GC]	Carbohydrate transport and metabolism;; Energy production and conversion	UDP-glucoronosyl and UDP-glucosyl transferase;; Glycosyltransferase family 28 C-terminal domain	Zeatin O-glucosyltransferase OS=Phaseolus lunatus OX=3884 GN=ZOG1 PE=2 SV=1	S	Function unknown	PREDICTED: zeatin O-glucosyltransferase-like [Nicotiana sylvestris]	molecular function: catalytic activity (GO:0003824);; biological process: metabolic process (GO:0008152);; cellular component: cell (GO:0005623);; cellular component: organelle (GO:0043226);; cellular component: cell part (GO:0044464);; biological process: cellular process (GO:0009987);; biological process: single-organism process (GO:0044699)
Niben101Scf00493g00008	Niben101Scf00493g00008	3.81058	4.43713	4.23016	1.54358	2.88445	1.38224	1.37385	1.20182	1.32089	1.73144	1.53314	0.912061	7.55e-12	-1.6613	down	0.486662	-0.38547	normal	0.000113	0.957731	normal	0.980067	0.016252	normal	0.427495	-0.35763	normal	[HR]	Coenzyme transport and metabolism;; General function prediction only	Cellular Component: membrane (GO:0016020);;	--	--	[R]	General function prediction only	alpha/beta hydrolase fold;; Alpha/beta hydrolase family	1-acylglycerol-3-phosphate O-acyltransferase OS=Arabidopsis thaliana OX=3702 GN=At4g24160 PE=1 SV=1	S	Function unknown	PREDICTED: epoxide hydrolase 4-like [Nicotiana sylvestris]	cellular component: membrane (GO:0016020)
Niben101Scf00493g00020	Niben101Scf00493g00020	941.722	1198.08	1163.8	897.036	628.753	499.112	474.168	634.812	675.766	1128.18	1102.43	1159.47	3.86e-09	-1.06437	down	0.835218	-0.11204	normal	0.810063	-0.10428	normal	6.7e-06	-1.10397	down	3.13e-14	-1.21445	down	--	--	Cellular Component: extracellular region (GO:0005576);; Cellular Component: cell wall (GO:0005618);; Molecular Function: manganese ion binding (GO:0030145);; Biological Process: oxalate metabolic process (GO:0033609);; Molecular Function: nutrient reservoir activity (GO:0045735);; Molecular Function: oxalate decarboxylase activity (GO:0046564);;	--	--	--	--	Cupin;; Cupin domain	Auxin-binding protein ABP19a OS=Prunus persica OX=3760 GN=ABP19A PE=3 SV=1	S	Function unknown	PREDICTED: auxin-binding protein ABP19a-like [Nicotiana sylvestris]	cellular component: extracellular region (GO:0005576);; cellular component: cell (GO:0005623);; cellular component: cell part (GO:0044464);; molecular function: binding (GO:0005488);; biological process: metabolic process (GO:0008152);; biological process: cellular process (GO:0009987);; biological process: single-organism process (GO:0044699);; molecular function: nutrient reservoir activity (GO…
Niben101Scf00495g02007	Niben101Scf00495g02007	1.23316	1.16035	1.71923	0.728461	0.819772	1.08654	2.08841	1.29004	1.6708	1.44232	1.67987	1.85017	0.949578	0.04442	normal	0.063698	0.797916	normal	0.75026	-0.20243	normal	0.000717	-1.18681	down	0.557499	-0.25781	normal	--	--	--	--	--	--	--	--	--	K	Transcription	PREDICTED: transcription factor TCP17-like [Nicotiana tabacum]	--
Niben101Scf00496g00001	Niben101Scf00496g00001	130.391	118.209	122.652	82.1834	60.2578	76.2873	122.828	93.4486	90.7157	134.072	128.757	125.704	0.007338	-0.49333	normal	0.066826	0.513745	normal	0.647899	-0.13596	normal	1.84e-10	-1.21473	down	0.000144	-0.65292	normal	[O]	Posttranslational modification, protein turnover, chaperones	Cellular Component: chloroplast (GO:0009507);;	--	--	[S]	Function unknown	AhpC/TSA antioxidant enzyme	Thioredoxin-like protein AAED1, chloroplastic OS=Arabidopsis thaliana OX=3702 GN=At2g37240 PE=1 SV=2	O	Posttranslational modification, protein turnover, chaperones	PREDICTED: thioredoxin-like protein AAED1, chloroplastic [Nicotiana tabacum]	cellular component: cell (GO:0005623);; cellular component: organelle (GO:0043226);; cellular component: cell part (GO:0044464)
Niben101Scf00497g02005	Niben101Scf00497g02005	3.11256	1.66218	2.34475	1.51069	1.55903	1.22087	5.58369	4.74112	2.2798	2.10224	2.05003	1.80956	0.278348	0.457005	normal	0.000125	1.33196	up	0.866196	0.121478	normal	0.00103	-0.85969	normal	0.066718	0.624061	normal	[E]	Amino acid transport and metabolism	Molecular Function: transporter activity (GO:0005215);; Biological Process: transport (GO:0006810);; Cellular Component: integral component of membrane (GO:0016021);;	K14638|0|sot:102588731|K14638 solute carrier family 15 (peptide/histidine transporter), member 3/4 | (RefSeq) protein NRT1/ PTR FAMILY 7.3-like	--	[E]	Amino acid transport and metabolism	POT family	Protein NRT1/ PTR FAMILY 7.3 OS=Arabidopsis thaliana OX=3702 GN=NPF7.3 PE=1 SV=2	E	Amino acid transport and metabolism	PREDICTED: protein NRT1/ PTR FAMILY 7.3-like isoform X1 [Nicotiana sylvestris]	molecular function: transporter activity (GO:0005215);; biological process: localization (GO:0051179);; cellular component: membrane (GO:0016020);; cellular component: membrane part (GO:0044425)
Niben101Scf00503g01012	Niben101Scf00503g01012	2.25602	3.15887	2.91013	2.7068	3.4381	2.53493	0.755103	2.2942	1.72142	3.58982	2.84307	3.99321	0.034797	-0.79159	normal	0.20448	-0.6118	normal	0.511843	-0.2892	normal	0.018673	-0.66791	normal	0.000354	-1.18236	down	--	--	Cellular Component: Golgi apparatus (GO:0005794);; Cellular Component: membrane (GO:0016020);; Molecular Function: O-acetyltransferase activity (GO:0016413);; Biological Process: cell wall organization or biogenesis (GO:0071554);;	--	--	--	--	GDSL/SGNH-like Acyl-Esterase family found in Pmr5 and Cas1p;; PMR5 N terminal Domain	Protein trichome birefringence-like 25 OS=Arabidopsis thaliana OX=3702 GN=TBL25 PE=2 SV=1	S	Function unknown	PREDICTED: protein trichome birefringence-like 25 [Nicotiana sylvestris]	cellular component: cell (GO:0005623);; cellular component: organelle (GO:0043226);; cellular component: cell part (GO:0044464);; cellular component: membrane (GO:0016020);; molecular function: catalytic activity (GO:0003824);; biological process: cellular process (GO:0009987)
Niben101Scf00503g03007	Niben101Scf00503g03007	3.37816	5.53733	2.44401	2.73167	1.66043	2.4696	3.36987	3.39208	5.10809	4.53279	4.04286	5.36755	0.789211	-0.14691	normal	0.041757	0.732243	normal	0.594443	-0.2638	normal	1.31e-06	-1.34784	down	0.053135	-0.52605	normal	[HJ]	Coenzyme transport and metabolism;; Translation, ribosomal structure and biogenesis	--	K14506|0|spen:107007864|K14506 jasmonic acid-amino synthetase | (RefSeq) jasmonic acid-amido synthetase JAR1-like	Plant hormone signal transduction (ko04075)	--	--	GH3 auxin-responsive promoter	Jasmonic acid-amido synthetase JAR1 OS=Oryza sativa subsp. japonica OX=39947 GN=GH3.5 PE=2 SV=1	S	Function unknown	PREDICTED: probable indole-3-acetic acid-amido synthetase GH3.5 [Nicotiana sylvestris]	--
Niben101Scf00503g05016	Niben101Scf00503g05016	168.074	160.806	140.613	121.385	84.9106	109.97	129.678	160.535	123.944	162.534	179.287	155.243	0.035037	-0.40312	normal	0.175422	0.417476	normal	0.61624	-0.14794	normal	2.75e-07	-1.03374	down	0.000437	-0.57733	normal	--	--	--	--	--	--	--	--	--	S	Function unknown	PREDICTED: uncharacterized protein LOC104244657 [Nicotiana sylvestris]	--
Niben101Scf00503g06003	Niben101Scf00503g06003	5.50899	5.2336	5.66903	4.63469	2.88215	5.67366	10.9375	9.73377	8.08921	5.65654	8.04676	6.39277	0.011202	0.524708	normal	0.000617	1.04093	up	0.263035	-0.31148	normal	0.000681	-0.95223	normal	0.511313	0.175457	normal	--	--	Molecular Function: structural constituent of ribosome (GO:0003735);; Biological Process: translation (GO:0006412);; Cellular Component: integral component of membrane (GO:0016021);; Biological Process: transmembrane transport (GO:0055085);;	K15119|0|sot:102598884|K15119 solute carrier family 25, member 39/40 | (RefSeq) mitochondrial carrier protein MTM1-like	--	[C]	Energy production and conversion	Mitochondrial carrier protein;; Mitochondrial carrier protein	Mitochondrial carrier protein MTM1 OS=Arabidopsis thaliana OX=3702 GN=MTM1 PE=2 SV=1	S	Function unknown	PREDICTED: mitochondrial carrier protein MTM1-like [Nicotiana tabacum]	molecular function: structural molecule activity (GO:0005198);; biological process: metabolic process (GO:0008152);; biological process: cellular process (GO:0009987);; cellular component: membrane (GO:0016020);; cellular component: membrane part (GO:0044425);; biological process: localization (GO:0051179)
Niben101Scf00503g07005	Niben101Scf00503g07005	0.360222	0.25191	0.455723	1.19033	1.64098	1.83867	1.81729	1.68883	1.24102	0.294739	0.671339	0.299094	0.001074	1.22731	up	0.91664	0.081801	normal	--	--	--	0.012663	1.15329	up	0.006777	1.08184	up	--	--	Biological Process: transcription, DNA-templated (GO:0006351);;	--	--	--	--	AP2 domain	Ethylene-responsive transcription factor CRF4 OS=Arabidopsis thaliana OX=3702 GN=CRF4 PE=1 SV=2	--	--	PREDICTED: pathogenesis-related genes transcriptional activator PTI6-like [Nicotiana attenuata]	biological process: metabolic process (GO:0008152);; biological process: cellular process (GO:0009987)
Niben101Scf00504g02001	Niben101Scf00504g02001	12.6369	10.1795	13.5605	8.36797	6.47647	13.443	21.663	16.9813	15.9932	13.9148	18.1699	15.2995	0.241879	0.311888	normal	0.005648	0.892296	normal	0.092645	-0.39165	normal	3.91e-05	-1.0958	down	0.641501	-0.12276	normal	--	--	Cellular Component: cytoplasm (GO:0005737);; Biological Process: metal ion transport (GO:0030001);; Molecular Function: transition metal ion binding (GO:0046914);; Biological Process: cellular transition metal ion homeostasis (GO:0046916);;	--	--	[P]	Inorganic ion transport and metabolism	Heavy-metal-associated domain	Heavy metal-associated isoprenylated plant protein 3 OS=Arabidopsis thaliana OX=3702 GN=HIPP03 PE=1 SV=1	S	Function unknown	PREDICTED: heavy metal-associated isoprenylated plant protein 3-like [Nicotiana tomentosiformis]	cellular component: cell (GO:0005623);; cellular component: cell part (GO:0044464);; biological process: localization (GO:0051179);; molecular function: binding (GO:0005488);; biological process: cellular process (GO:0009987);; biological process: single-organism process (GO:0044699);; biological process: biological regulation (GO:0065007)
Niben101Scf00505g03002	Niben101Scf00505g03002	37.0487	35.612	35.5766	29.1575	24.7652	23.2221	29.3602	29.2785	25.825	40.1354	37.1646	44.9634	3.77e-05	-0.5827	normal	0.556746	0.187108	normal	0.395828	-0.23226	normal	7.11e-08	-1.05956	down	2.27e-07	-0.84188	normal	--	--	Cellular Component: chloroplast thylakoid (GO:0009534);; Cellular Component: chloroplast envelope (GO:0009941);;	--	--	--	--	PAP_fibrillin	Probable plastid-lipid-associated protein 8, chloroplastic OS=Arabidopsis thaliana OX=3702 GN=PAP8 PE=1 SV=1	S	Function unknown	PREDICTED: probable plastid-lipid-associated protein 8, chloroplastic [Nicotiana sylvestris]	cellular component: cell (GO:0005623);; cellular component: organelle (GO:0043226);; cellular component: organelle part (GO:0044422);; cellular component: cell part (GO:0044464)
Niben101Scf00508g00002	Niben101Scf00508g00002	585.065	538.697	568.383	401.642	328.493	271.29	438.306	390.787	414.262	765.361	580.13	712.454	2.07e-08	-0.67299	normal	0.22754	0.351837	normal	0.19224	-0.32493	normal	4.49e-10	-1.40716	down	1.46e-09	-1.02716	down	[C]	Energy production and conversion	Molecular Function: copper ion binding (GO:0005507);; Molecular Function: electron carrier activity (GO:0009055);; Cellular Component: chloroplast thylakoid membrane (GO:0009535);; Biological Process: oxidation-reduction process (GO:0055114);;	K02638|1.04876e-50|spen:107017609|K02638 plastocyanin | (RefSeq) plastocyanin, chloroplastic	Photosynthesis (ko00195)	--	--	EF hand;; EF-hand domain pair;; Copper binding proteins, plastocyanin/azurin family	Plastocyanin, chloroplastic OS=Solanum lycopersicum OX=4081 GN=PETE PE=2 SV=1	C	Energy production and conversion	PREDICTED: plastocyanin [Nicotiana attenuata]	molecular function: binding (GO:0005488);; molecular function: electron carrier activity (GO:0009055);; cellular component: cell (GO:0005623);; cellular component: membrane (GO:0016020);; cellular component: organelle (GO:0043226);; cellular component: organelle part (GO:0044422);; cellular component: cell part (GO:0044464);; biological process: metabolic process (GO:0008152);; biological process…
Niben101Scf00508g00007	Niben101Scf00508g00007	658.999	601.529	546.848	378.906	284.799	260.744	364.802	362.901	337.684	678.037	636.921	861.496	9.76e-17	-0.97785	normal	0.454549	0.249351	normal	0.22102	-0.31143	normal	1.69e-12	-1.5873	down	9.65e-16	-1.31337	down	[C]	Energy production and conversion	Molecular Function: copper ion binding (GO:0005507);; Molecular Function: electron carrier activity (GO:0009055);; Cellular Component: chloroplast thylakoid membrane (GO:0009535);; Biological Process: oxidation-reduction process (GO:0055114);;	K02638|5.49783e-78|spen:107017609|K02638 plastocyanin | (RefSeq) plastocyanin, chloroplastic	Photosynthesis (ko00195)	--	--	Copper binding proteins, plastocyanin/azurin family;; Cupredoxin-like domain	Plastocyanin, chloroplastic OS=Solanum lycopersicum OX=4081 GN=PETE PE=2 SV=1	C	Energy production and conversion	PREDICTED: plastocyanin [Nicotiana attenuata]	molecular function: binding (GO:0005488);; molecular function: electron carrier activity (GO:0009055);; cellular component: cell (GO:0005623);; cellular component: membrane (GO:0016020);; cellular component: organelle (GO:0043226);; cellular component: organelle part (GO:0044422);; cellular component: cell part (GO:0044464);; biological process: metabolic process (GO:0008152);; biological process…
Niben101Scf00509g01014	Niben101Scf00509g01014	5.38697	5.62247	5.45083	4.391	1.70082	2.28915	3.41776	3.90754	3.62329	5.26099	6.07724	4.52944	1.63e-06	-0.79133	normal	0.514658	0.350998	normal	0.980838	-0.01909	normal	0.000591	-1.18437	down	1.81e-06	-0.82827	normal	[R]	General function prediction only	Cellular Component: chloroplast (GO:0009507);; Cellular Component: membrane (GO:0016020);;	K14347|2.97185e-171|sot:102583020|K14347 solute carrier family 10 (sodium/bile acid cotransporter), member 7 | (RefSeq) probable sodium/metabolite cotransporter BASS4, chloroplastic	--	[R]	General function prediction only	SBF-like CPA transporter family (DUF4137);; Sodium Bile acid symporter family	Probable sodium/metabolite cotransporter BASS4, chloroplastic OS=Arabidopsis thaliana OX=3702 GN=BASS4 PE=3 SV=1	S	Function unknown	PREDICTED: probable sodium/metabolite cotransporter BASS4, chloroplastic [Nicotiana attenuata]	cellular component: cell (GO:0005623);; cellular component: organelle (GO:0043226);; cellular component: cell part (GO:0044464);; cellular component: membrane (GO:0016020)
Niben101Scf00520g12006	Niben101Scf00520g12006	2.87307	1.23423	0.85655	0.989735	0.77828	1.47466	0.545778	0.460755	0.712299	0.91183	0.851038	0.605512	0.003583	-1.13274	down	0.23055	-0.6266	normal	0.312809	0.419489	normal	0.973743	0.02222	normal	0.169158	-0.60017	normal	[T]	Signal transduction mechanisms	Molecular Function: signal transducer, downstream of receptor, with serine/threonine kinase activity (GO:0004702);; Molecular Function: ATP binding (GO:0005524);; Cellular Component: cytoplasm (GO:0005737);; Biological Process: protein phosphorylation (GO:0006468);;	--	--	[T]	Signal transduction mechanisms	Protein kinase domain;; Protein tyrosine kinase	Mitogen-activated protein kinase kinase kinase 17 OS=Arabidopsis thaliana OX=3702 GN=MAPKKK17 PE=1 SV=1	T	Signal transduction mechanisms	PREDICTED: mitogen-activated protein kinase kinase kinase A-like [Nicotiana attenuata]	biological process: metabolic process (GO:0008152);; biological process: cellular process (GO:0009987);; biological process: signaling (GO:0023052);; biological process: single-organism process (GO:0044699);; biological process: response to stimulus (GO:0050896);; biological process: biological regulation (GO:0065007);; molecular function: catalytic activity (GO:0003824);; molecular function: sig…
Niben101Scf00522g01017	Niben101Scf00522g01017	2.88776	0.780195	3.00624	0.636895	0.427859	0.982892	12.6747	6.07726	5.81045	1.69314	7.99349	1.69672	0.093246	0.775949	normal	2.79e-18	2.8379	up	0.818205	-0.11985	normal	0.001826	-1.74769	down	0.505265	0.388497	normal	--	--	Molecular Function: DNA binding (GO:0003677);;	K09422|2.16499e-77|sot:102589612|K09422 myb proto-oncogene protein, plant | (RefSeq) myb-related protein 305-like	--	[K]	Transcription	Myb-like DNA-binding domain;; Myb-like DNA-binding domain	Transcription factor MYB62 OS=Arabidopsis thaliana OX=3702 GN=MYB62 PE=2 SV=1	K	Transcription	PREDICTED: transcription factor MYB57-like [Nicotiana sylvestris]	molecular function: binding (GO:0005488)
Niben101Scf00522g01022	Niben101Scf00522g01022	2.80935	2.57178	3.66255	1.25993	0.975318	1.04073	2.10211	1.5257	1.53875	3.58593	4.45813	3.84002	0.003149	-0.88495	normal	0.177421	0.591922	normal	0.371347	-0.34337	normal	1.68e-16	-2.12678	down	4.76e-09	-1.38162	down	--	--	--	--	--	--	--	--	Transcription factor BEE 3 OS=Arabidopsis thaliana OX=3702 GN=BEE3 PE=2 SV=1	K	Transcription	PREDICTED: transcription factor BEE 3-like [Nicotiana tabacum]	--
Niben101Scf00525g04008	Niben101Scf00525g04008	14.9898	11.3853	15.3229	11.3553	10.9395	12.0977	28.836	25.9702	24.4664	15.5158	13.6378	12.997	0.000829	0.636216	normal	1.73e-15	1.22639	up	0.891317	-0.08166	normal	8.51e-05	-0.70973	normal	0.001849	0.54117	normal	--	--	Cellular Component: intracellular (GO:0005622);; Biological Process: vacuolar transport (GO:0007034);;	K12198|4.19122e-146|spen:107004824|K12198 charged multivesicular body protein 5 | (RefSeq) charged multivesicular body protein 5	Endocytosis (ko04144)	[U]	Intracellular trafficking, secretion, and vesicular transport	Snf7	Vacuolar protein sorting-associated protein 60.1 OS=Arabidopsis thaliana OX=3702 GN=VPS60-1 PE=1 SV=1	U	Intracellular trafficking, secretion, and vesicular transport	PREDICTED: charged multivesicular body protein 5-like [Nicotiana sylvestris]	cellular component: cell (GO:0005623);; cellular component: cell part (GO:0044464);; biological process: localization (GO:0051179)
Niben101Scf00526g01006	Niben101Scf00526g01006	3.36299	2.34704	5.00138	2.32298	2.00001	1.43487	2.85712	3.04216	1.93611	3.31352	3.59436	4.11154	0.278863	-0.50307	normal	0.524315	0.381967	normal	0.95442	-0.05626	normal	0.001489	-1.19112	down	0.067992	-0.6718	normal	--	--	Molecular Function: iron ion binding (GO:0005506);; Cellular Component: photosystem II (GO:0009523);; Cellular Component: chloroplast thylakoid membrane (GO:0009535);; Biological Process: response to herbicide (GO:0009635);; Biological Process: photosynthetic electron transport in photosystem II (GO:0009772);; Molecular Function: oxygen evolving activity (GO:0010242);; Cellular Component: integra…	K02703|1.65938e-80|eus:EUTSA_v10012367mg|K02703 photosystem II P680 reaction center D1 protein [EC:1.10.3.9] | (RefSeq) hypothetical protein	Photosynthesis (ko00195)	--	--	Photosynthetic reaction centre protein	Photosystem II protein D1 OS=Pisum sativum OX=3888 GN=psbA PE=1 SV=3	--	--	PsbA, partial (plastid) [Dianthus pygmaeus]	molecular function: binding (GO:0005488);; cellular component: cell (GO:0005623);; cellular component: membrane (GO:0016020);; cellular component: macromolecular complex (GO:0032991);; cellular component: membrane part (GO:0044425);; cellular component: cell part (GO:0044464);; cellular component: organelle (GO:0043226);; cellular component: organelle part (GO:0044422);; biological process: respo…
Niben101Scf00528g01006	Niben101Scf00528g01006	0.207533	0.152188	0.920344	0.712439	0.606848	0.715612	2.87945	1.6748	1.09581	0.298452	1.27551	0.237575	0.040204	0.904165	normal	0.017013	1.08752	up	--	--	--	--	--	--	0.090539	0.795618	normal	--	--	Molecular Function: protein kinase activity (GO:0004672);; Cellular Component: membrane (GO:0016020);; Biological Process: phosphorylation (GO:0016310);;	K04733|3.20837e-97|pop:POPTR_0001s23530g|K04733 interleukin-1 receptor-associated kinase 4 [EC:2.7.11.1] | (RefSeq) hypothetical protein	--	--	--	D-mannose binding lectin;; PAN-like domain	G-type lectin S-receptor-like serine/threonine-protein kinase LECRK1 OS=Oryza sativa subsp. japonica OX=39947 GN=LECRK1 PE=2 SV=1	--	--	PREDICTED: G-type lectin S-receptor-like serine/threonine-protein kinase LECRK4 [Nicotiana attenuata]	biological process: metabolic process (GO:0008152);; biological process: cellular process (GO:0009987);; molecular function: catalytic activity (GO:0003824);; cellular component: membrane (GO:0016020)
Niben101Scf00530g06018	Niben101Scf00530g06018	0.118479	1.20249	0.249983	1.40292	2.93487	1.09886	0.502459	0.154739	0.61158	0.212366	0.633536	0.123895	--	--	--	0.004177	-1.30312	down	--	--	--	0.001267	1.56508	up	--	--	--	--	--	Cellular Component: nucleus (GO:0005634);; Biological Process: stomatal complex development (GO:0010374);; Molecular Function: protein dimerization activity (GO:0046983);;	K20558|8.51794e-139|sot:102604858|K20558 transcription factor SPEECHLESS | (RefSeq) transcription factor SPEECHLESS	--	--	--	Helix-loop-helix DNA-binding domain	Transcription factor SPEECHLESS OS=Arabidopsis thaliana OX=3702 GN=SPCH PE=1 SV=1	K	Transcription	PREDICTED: transcription factor SPEECHLESS [Nicotiana sylvestris]	cellular component: cell (GO:0005623);; cellular component: organelle (GO:0043226);; cellular component: cell part (GO:0044464);; biological process: multicellular organismal process (GO:0032501);; biological process: developmental process (GO:0032502);; biological process: single-organism process (GO:0044699);; molecular function: binding (GO:0005488)
Niben101Scf00530g10010	Niben101Scf00530g10010	1.69122	0.132222	0.057283	0.564401	1.26994	3.64153	0.390162	0.473474	0.448926	0.593718	0.350414	0.059252	0.800297	-0.15191	normal	0.013192	-1.19993	down	--	--	--	0.160974	0.911241	normal	0.979903	0.021781	normal	[T]	Signal transduction mechanisms	Molecular Function: protein serine/threonine phosphatase activity (GO:0004722);; Biological Process: protein dephosphorylation (GO:0006470);; Molecular Function: metal ion binding (GO:0046872);;	K14497|9.68306e-178|sot:102582408|K14497 protein phosphatase 2C [EC:3.1.3.16] | (RefSeq) probable protein phosphatase 2C 51	Plant hormone signal transduction (ko04075)	[T]	Signal transduction mechanisms	Protein phosphatase 2C	Probable protein phosphatase 2C 8 OS=Oryza sativa subsp. japonica OX=39947 GN=Os01g0656200 PE=2 SV=1	T	Signal transduction mechanisms	PREDICTED: probable protein phosphatase 2C 51 [Nicotiana attenuata]	biological process: metabolic process (GO:0008152);; biological process: cellular process (GO:0009987);; molecular function: catalytic activity (GO:0003824);; molecular function: binding (GO:0005488)
Niben101Scf00536g04007	Niben101Scf00536g04007	4.24676	10.6321	5.46049	17.5409	18.8134	11.8189	4.47708	5.85733	6.49808	6.80226	5.07332	6.92022	0.30117	-0.42168	normal	2.03e-07	-1.30643	down	0.990515	0.015625	normal	0.001285	0.861646	normal	0.091912	-0.46524	normal	[G]	Carbohydrate transport and metabolism	Molecular Function: hydrolase activity, hydrolyzing O-glycosyl compounds (GO:0004553);; Cellular Component: cell wall (GO:0005618);; Biological Process: xyloglucan metabolic process (GO:0010411);; Molecular Function: xyloglucan:xyloglucosyl transferase activity (GO:0016762);; Biological Process: cell wall biogenesis (GO:0042546);; Cellular Component: apoplast (GO:0048046);; Biological Process: ce…	K08235|0|spen:107012559|K08235 xyloglucan:xyloglucosyl transferase [EC:2.4.1.207] | (RefSeq) probable xyloglucan endotransglucosylase/hydrolase protein 8	--	--	--	Glycosyl hydrolases family 16;; Xyloglucan endo-transglycosylase (XET) C-terminus	Probable xyloglucan endotransglucosylase/hydrolase protein 8 OS=Arabidopsis thaliana OX=3702 GN=XTH8 PE=2 SV=2	G	Carbohydrate transport and metabolism	PREDICTED: probable xyloglucan endotransglucosylase/hydrolase protein 8 [Nicotiana sylvestris]	molecular function: catalytic activity (GO:0003824);; cellular component: cell (GO:0005623);; cellular component: cell part (GO:0044464);; biological process: metabolic process (GO:0008152);; biological process: cellular process (GO:0009987);; biological process: cellular component organization or biogenesis (GO:0071840);; cellular component: extracellular region (GO:0005576)
Niben101Scf00536g05012	Niben101Scf00536g05012	161.589	164.541	185.86	107.921	79.6012	112.558	162.752	138.016	122.57	194.176	178.508	188.864	0.007659	-0.49583	normal	0.056125	0.52302	normal	0.492901	-0.19348	normal	7.65e-11	-1.28742	down	1.15e-05	-0.72098	normal	[HT]	Coenzyme transport and metabolism;; Signal transduction mechanisms	Molecular Function: protein kinase activity (GO:0004672);; Molecular Function: ATP binding (GO:0005524);; Biological Process: protein phosphorylation (GO:0006468);; Cellular Component: chloroplast (GO:0009507);;	K08869|0|sot:102581356|K08869 aarF domain-containing kinase | (RefSeq) uncharacterized protein sll0005	--	[R]	General function prediction only	ABC1 family;; Phosphotransferase enzyme family	Protein ACTIVITY OF BC1 COMPLEX KINASE 3, chloroplastic OS=Arabidopsis thaliana OX=3702 GN=ABC1K3 PE=1 SV=1	S	Function unknown	PREDICTED: uncharacterized aarF domain-containing protein kinase At1g79600, chloroplastic [Nicotiana sylvestris]	biological process: metabolic process (GO:0008152);; biological process: cellular process (GO:0009987);; molecular function: catalytic activity (GO:0003824);; molecular function: binding (GO:0005488);; cellular component: cell (GO:0005623);; cellular component: organelle (GO:0043226);; cellular component: cell part (GO:0044464)
Niben101Scf00536g12004	Niben101Scf00536g12004	0.684699	1.11598	0.711804	1.66321	2.21419	1.31645	0.542214	0.237783	0.824455	0.519874	0.243204	0.265904	0.244901	-0.56387	normal	0.008057	-1.15883	down	0.227396	0.462963	normal	0.000121	1.56056	up	--	--	--	--	--	Molecular Function: methyltransferase activity (GO:0008168);; Biological Process: methylation (GO:0032259);;	--	--	--	--	SAM dependent carboxyl methyltransferase	Salicylate carboxymethyltransferase OS=Clarkia breweri OX=36903 GN=SAMT PE=1 SV=1	S	Function unknown	salicylic acid methyl transferase [Nicotiana benthamiana]	molecular function: catalytic activity (GO:0003824);; biological process: metabolic process (GO:0008152)
Niben101Scf00536g15017	Niben101Scf00536g15017	2.49389	1.92309	0.822607	2.04951	2.05317	4.24337	1.87329	2.04657	2.62552	0.113131	0.575154	0.350577	0.922163	0.067996	normal	0.70438	-0.22664	normal	0.002125	0.84675	normal	1.28e-06	2.0756	up	5.41e-07	1.72142	up	[Q]	Secondary metabolites biosynthesis, transport and catabolism	Biological Process: flavonoid biosynthetic process (GO:0009813);; Molecular Function: naringenin-chalcone synthase activity (GO:0016210);;	K00660|0|sot:102577871|K00660 chalcone synthase [EC:2.3.1.74] | (RefSeq) CHS1A, CHS, CHS1B; chalcone synthase 1a	Flavonoid biosynthesis (ko00941);; Circadian rhythm - plant (ko04712)	--	--	Chalcone and stilbene synthases, N-terminal domain;; Chalcone and stilbene synthases, C-terminal domain;; 3-Oxoacyl-[acyl-carrier-protein (ACP)] synthase III C terminal;; 3-Oxoacyl-[acyl-carrier-protein (ACP)] synthase III;; FAE1/Type III polyketide synthase-like protein	Chalcone synthase A OS=Petunia hybrida OX=4102 GN=CHSA PE=2 SV=1	Q	Secondary metabolites biosynthesis, transport and catabolism	chalcone synthase [Nicotiana benthamiana]	biological process: metabolic process (GO:0008152);; molecular function: catalytic activity (GO:0003824)
Niben101Scf00537g02019	Niben101Scf00537g02019	0.511641	0.625149	0.660225	2.13223	1.19633	0.999535	0.548843	0.285933	0.988222	0.108211	0.207301	0.124229	--	--	--	0.176938	-0.74649	normal	--	--	--	1.64e-05	2.06385	up	--	--	--	--	--	--	--	--	--	--	--	--	S	Function unknown	PREDICTED: uncharacterized protein LOC107805085 [Nicotiana tabacum]	--
Niben101Scf00537g02021	Niben101Scf00537g02021	1.09916	2.01329	1.19908	2.7855	4.73506	3.24945	0.905502	0.916375	1.47199	0.472651	0.734928	0.554381	0.249317	-0.49039	normal	8.43e-06	-1.37778	down	0.041006	0.648794	normal	1.63e-11	1.97803	up	0.297221	0.446149	normal	--	--	--	--	--	--	--	Cleavage site for pathogenic type III effector avirulence factor Avr	--	S	Function unknown	PREDICTED: uncharacterized protein LOC104223434 [Nicotiana sylvestris]	--
Niben101Scf00537g02022	Niben101Scf00537g02022	17.0034	8.83097	4.64263	22.8177	54.7071	46.7197	17.8987	25.1543	18.1757	5.91353	7.71576	5.24075	0.118411	0.607903	normal	0.01924	-0.80516	normal	0.719305	0.213229	normal	1.39e-15	2.12116	up	2e-10	1.27021	up	--	--	--	--	--	--	--	--	Uncharacterized protein At5g48480 OS=Arabidopsis thaliana OX=3702 GN=At5g48480 PE=1 SV=1	S	Function unknown	PREDICTED: uncharacterized protein At5g48480-like [Nicotiana tabacum]	--
Niben101Scf00539g04003	Niben101Scf00539g04003	1.05527	1.04632	0.798906	2.19401	5.86148	7.59363	1.21269	1.13069	1.2576	1.0837	2.36411	1.42973	--	--	--	0.00122	-1.39137	down	--	--	--	0.036036	0.998673	normal	--	--	--	--	--	Molecular Function: zinc ion binding (GO:0008270);; Cellular Component: integral component of membrane (GO:0016021);; Biological Process: protein ubiquitination (GO:0016567);; Biological Process: proteasome-mediated ubiquitin-dependent protein catabolic process (GO:0043161);; Molecular Function: ubiquitin protein ligase activity (GO:0061630);;	K19037|1.64445e-76|sot:102579819|K19037 E3 ubiquitin-protein ligase ATL23 [EC:2.3.2.27] | (RefSeq) E3 ubiquitin-protein ligase ATL23	--	[O]	Posttranslational modification, protein turnover, chaperones	Ring finger domain;; RING-like zinc finger;; RING-H2 zinc finger domain;; Zinc finger, C3HC4 type (RING finger);; Zinc finger, C3HC4 type (RING finger);; Zinc finger, C3HC4 type (RING finger)	E3 ubiquitin-protein ligase ATL23 OS=Arabidopsis thaliana OX=3702 GN=ATL23 PE=1 SV=2	O	Posttranslational modification, protein turnover, chaperones	PREDICTED: E3 ubiquitin-protein ligase ATL23-like [Nicotiana sylvestris]	molecular function: binding (GO:0005488);; cellular component: membrane (GO:0016020);; cellular component: membrane part (GO:0044425);; biological process: metabolic process (GO:0008152);; biological process: cellular process (GO:0009987);; molecular function: catalytic activity (GO:0003824)
Niben101Scf00539g05008	Niben101Scf00539g05008	19.4065	4.31412	1.10056	14.3727	9.11779	31.7483	32.5531	23.0476	15.0579	5.18979	5.73236	3.43883	0.50114	0.350685	normal	0.607833	0.321918	normal	0.877856	0.080488	normal	0.000802	1.31185	up	2.35e-10	1.69459	up	[O]	Posttranslational modification, protein turnover, chaperones	--	K17609|2.73356e-98|spen:107015554|K17609 nucleoredoxin [EC:1.8.1.8] | (RefSeq) probable nucleoredoxin 2	--	[R]	General function prediction only	Thioredoxin-like;; AhpC/TSA family	Probable nucleoredoxin 2 OS=Oryza sativa subsp. japonica OX=39947 GN=Os01g0794400 PE=2 SV=1	O	Posttranslational modification, protein turnover, chaperones	PREDICTED: probable nucleoredoxin 2 [Nicotiana tabacum]	--
Niben101Scf00539g05009	Niben101Scf00539g05009	19.3234	3.20618	1.07203	14.5801	9.69314	34.145	28.9766	23.4647	15.589	4.87631	5.88769	3.91463	0.509669	0.340961	normal	0.750287	0.221365	normal	0.906298	0.063358	normal	0.000769	1.3403	up	8.06e-11	1.64545	up	[O]	Posttranslational modification, protein turnover, chaperones	--	K17609|1.44656e-96|sot:102580139|K17609 nucleoredoxin [EC:1.8.1.8] | (RefSeq) probable nucleoredoxin 2	--	[R]	General function prediction only	Thioredoxin-like;; C1 domain	Probable nucleoredoxin 2 OS=Oryza sativa subsp. japonica OX=39947 GN=Os01g0794400 PE=2 SV=1	O	Posttranslational modification, protein turnover, chaperones	PREDICTED: probable nucleoredoxin 2 [Nicotiana tabacum]	--
Niben101Scf00539g07005	Niben101Scf00539g07005	2.70013	0.871867	2.36448	1.86742	1.35467	1.93977	5.01115	4.76537	3.87171	1.39154	3.79846	1.94726	0.098037	0.683272	normal	0.000162	1.23244	up	0.868146	-0.12912	normal	0.110537	-0.73143	normal	0.222162	0.494026	normal	--	--	--	--	--	--	--	--	Uncharacterized protein At1g76070 OS=Arabidopsis thaliana OX=3702 GN=At1g76070 PE=1 SV=1	S	Function unknown	PREDICTED: uncharacterized protein At1g76070 [Nicotiana sylvestris]	--
Niben101Scf00539g07022	Niben101Scf00539g07022	61.1245	65.6359	56.7257	42.1822	37.7142	28.917	31.5216	37.4654	37.975	75.5985	71.8871	83.3915	2.73e-14	-0.98926	normal	0.940897	0.03767	normal	0.033925	-0.37901	normal	2.65e-13	-1.46159	down	1.91e-22	-1.40239	down	[I]	Lipid transport and metabolism	Molecular Function: phospholipase D activity (GO:0004630);; Molecular Function: calcium ion binding (GO:0005509);; Cellular Component: membrane (GO:0016020);; Biological Process: lipid catabolic process (GO:0016042);; Biological Process: phosphatidylcholine metabolic process (GO:0046470);; Molecular Function: N-acylphosphatidylethanolamine-specific phospholipase D activity (GO:0070290);;	K01115|0|sot:102583483|K01115 phospholipase D1/2 [EC:3.1.4.4] | (RefSeq) phospholipase D delta-like	Glycerophospholipid metabolism (ko00564);; Ether lipid metabolism (ko00565);; Endocytosis (ko04144)	[I]	Lipid transport and metabolism	Phospholipase D C terminal;; Phospholipase D Active site motif;; PLD-like domain;; Copper binding proteins, plastocyanin/azurin family;; Cupredoxin-like domain	Phospholipase D delta OS=Arabidopsis thaliana OX=3702 GN=PLDDELTA PE=1 SV=2	I	Lipid transport and metabolism	PREDICTED: phospholipase D delta-like [Nicotiana attenuata]	molecular function: catalytic activity (GO:0003824);; molecular function: binding (GO:0005488);; cellular component: membrane (GO:0016020);; biological process: metabolic process (GO:0008152);; biological process: single-organism process (GO:0044699);; biological process: cellular process (GO:0009987)
Niben101Scf00541g05003	Niben101Scf00541g05003	1.26718	1.48048	1.97311	0.972994	0.960528	0.738334	1.43562	1.38198	1.38009	1.46511	1.91142	1.55074	0.253061	-0.37197	normal	0.022464	0.658848	normal	0.889302	-0.09963	normal	6.87e-08	-1.24619	down	0.011656	-0.53265	normal	[K]	Transcription	Molecular Function: protein serine/threonine kinase activity (GO:0004674);; Molecular Function: ATP binding (GO:0005524);; Biological Process: protein phosphorylation (GO:0006468);; Cellular Component: integral component of membrane (GO:0016021);;	--	--	--	--	Leucine rich repeat;; Protein kinase domain;; Protein tyrosine kinase;; Leucine Rich repeats (2 copies);; Leucine Rich Repeat;; Leucine rich repeat N-terminal domain	Receptor-like protein kinase 2 OS=Arabidopsis thaliana OX=3702 GN=RCH2 PE=1 SV=1	S	Function unknown	PREDICTED: receptor-like protein kinase 2 [Nicotiana attenuata]	biological process: metabolic process (GO:0008152);; biological process: cellular process (GO:0009987);; molecular function: catalytic activity (GO:0003824);; molecular function: binding (GO:0005488);; cellular component: membrane (GO:0016020);; cellular component: membrane part (GO:0044425)
Niben101Scf00542g01003	Niben101Scf00542g01003	0.68647	0.490021	0.481687	0.909623	3.79754	0.758436	0.079479	0.444792	0.545721	0.282648	0.283345	0.256845	0.297221	-0.52979	normal	0.161439	-0.77309	normal	0.127642	0.535933	normal	0.000109	1.77213	up	0.979123	0.021966	normal	--	--	Cellular Component: condensin complex (GO:0000796);; Biological Process: mitotic chromosome condensation (GO:0007076);; Cellular Component: plasmodesma (GO:0009506);;	K06678|0|sly:101260195|K06678 condensin complex subunit 3 | (RefSeq) condensin complex subunit 3	--	[BD]	Chromatin structure and dynamics;; Cell cycle control, cell division, chromosome partitioning	Nuclear condensing complex subunits, C-term domain	--	BD	Chromatin structure and dynamics;; Cell cycle control, cell division, chromosome partitioning	PREDICTED: condensin complex subunit 3 [Nicotiana sylvestris]	cellular component: cell (GO:0005623);; cellular component: macromolecular complex (GO:0032991);; cellular component: organelle (GO:0043226);; cellular component: organelle part (GO:0044422);; cellular component: cell part (GO:0044464);; biological process: cellular process (GO:0009987);; biological process: single-organism process (GO:0044699);; biological process: cellular component organizatio…
Niben101Scf00542g04001	Niben101Scf00542g04001	1.13283	0.831431	1.689	0.404483	0.28372	0.204174	1.81467	0.588842	0.631791	2.0482	1.77802	2.17466	0.508935	-0.35853	normal	0.008632	1.21437	up	0.099446	-0.53287	normal	1.7e-22	-2.88739	down	0.00335	-1.0429	down	[T]	Signal transduction mechanisms	Molecular Function: voltage-gated potassium channel activity (GO:0005249);; Cellular Component: integral component of plasma membrane (GO:0005887);; Biological Process: regulation of membrane potential (GO:0042391);; Biological Process: potassium ion transmembrane transport (GO:0071805);;	--	--	[PT]	Inorganic ion transport and metabolism;; Signal transduction mechanisms	Ankyrin repeats (many copies);; Ion transport protein;; Ankyrin repeats (3 copies);; KHA, dimerisation domain of potassium ion channel;; Ankyrin repeats (many copies);; Ankyrin repeat;; Ankyrin repeat;; Cyclic nucleotide-binding domain;; Ion channel	Potassium channel SKOR OS=Arabidopsis thaliana OX=3702 GN=SKOR PE=1 SV=1	U	Intracellular trafficking, secretion, and vesicular transport	PREDICTED: potassium channel SKOR-like [Nicotiana tabacum]	biological process: cellular process (GO:0009987);; biological process: single-organism process (GO:0044699);; biological process: localization (GO:0051179);; biological process: biological regulation (GO:0065007);; molecular function: transporter activity (GO:0005215);; cellular component: cell (GO:0005623);; cellular component: membrane (GO:0016020);; cellular component: membrane part (GO:00444…
Niben101Scf00543g03005	Niben101Scf00543g03005	8.05885	6.72268	9.24621	5.68309	7.44116	7.15831	19.929	14.6907	13.7444	5.9836	8.13368	6.99382	0.002798	0.691064	normal	5.38e-09	1.23949	up	0.866382	0.097805	normal	0.010398	-0.47721	normal	3.01e-05	0.810359	normal	[M]	Cell wall/membrane/envelope biogenesis	Cellular Component: Golgi apparatus (GO:0005794);; Cellular Component: integral component of membrane (GO:0016021);;	--	--	--	--	Glycosyltransferase family 92;; Glycosyl transferase family 2	Glycosyltransferase family 92 protein RCOM_0530710 OS=Ricinus communis OX=3988 GN=RCOM_0699480 PE=3 SV=1	S	Function unknown	PREDICTED: glycosyltransferase family 92 protein RCOM_0530710-like [Nicotiana tabacum]	cellular component: cell (GO:0005623);; cellular component: organelle (GO:0043226);; cellular component: cell part (GO:0044464);; cellular component: membrane (GO:0016020);; cellular component: membrane part (GO:0044425)
Niben101Scf00546g06004	Niben101Scf00546g06004	55.6248	59.064	35.1571	94.0294	79.8662	82.7505	62.6474	46.2299	71.7166	30.6092	35.3069	26.8102	0.961823	0.025014	normal	0.155644	-0.41164	normal	0.034912	0.504455	normal	5.82e-09	1.01948	up	0.003617	0.586888	normal	--	--	--	--	--	--	--	--	--	--	--	PREDICTED: hydroxyproline-rich systemin-like [Nicotiana attenuata]	--
Niben101Scf00551g00006	Niben101Scf00551g00006	4.18812	4.34367	3.05116	7.51884	12.2293	11.6356	3.76613	4.99369	5.84471	2.87842	3.48297	2.60503	0.926416	0.06647	normal	0.032923	-0.83212	normal	--	--	--	0.000631	1.20363	up	0.586959	0.279064	normal	--	--	--	--	--	--	--	--	--	S	Function unknown	hypothetical protein A4A49_42093 [Nicotiana attenuata]	--
Niben101Scf00551g04013	Niben101Scf00551g04013	3.77516	4.26776	2.95837	7.69076	10.055	4.184	1.76132	2.87308	3.80431	2.91224	3.55847	2.52064	0.200737	-0.50108	normal	0.013626	-1.01458	down	0.831543	0.146398	normal	0.035748	0.765669	normal	0.386623	-0.35413	normal	--	--	Cellular Component: integral component of membrane (GO:0016021);;	--	--	--	--	Arabinogalactan peptide	Arabinogalactan protein 22 OS=Arabidopsis thaliana OX=3702 GN=AGP22 PE=1 SV=1	S	Function unknown	Arabinogalactan peptide 20 [Capsicum chinense]	cellular component: membrane (GO:0016020);; cellular component: membrane part (GO:0044425)
Niben101Scf00557g00008	Niben101Scf00557g00008	21.5907	22.0744	22.4296	16.0436	13.0072	14.1162	21.6871	19.4135	19.8383	25.0316	23.6497	27.1298	0.030966	-0.35226	normal	0.016364	0.533715	normal	0.338017	-0.25041	normal	2.32e-10	-1.20292	down	6.47e-05	-0.63582	normal	--	--	Cellular Component: chloroplast (GO:0009507);; Cellular Component: membrane (GO:0016020);;	--	--	--	--	Protein of unknown function (DUF3082)	--	S	Function unknown	PREDICTED: uncharacterized protein LOC104227702 isoform X2 [Nicotiana sylvestris]	cellular component: cell (GO:0005623);; cellular component: organelle (GO:0043226);; cellular component: cell part (GO:0044464);; cellular component: membrane (GO:0016020)
Niben101Scf00563g01003	Niben101Scf00563g01003	111.956	96.6977	100.193	66.6088	48.7024	73.0426	107.954	94.7536	79.1308	119.276	108.133	120.511	0.072689	-0.3578	normal	0.032186	0.597416	normal	0.348212	-0.23287	normal	1.31e-09	-1.2655	down	0.000551	-0.61904	normal	--	--	Cellular Component: integral component of membrane (GO:0016021);;	K13348|0|sot:102590255|K13348 protein Mpv17 | (RefSeq) uncharacterized LOC102590255	Peroxisome (ko04146)	[R]	General function prediction only	Mpv17 / PMP22 family	--	S	Function unknown	PREDICTED: uncharacterized protein LOC104220752 [Nicotiana sylvestris]	cellular component: membrane (GO:0016020);; cellular component: membrane part (GO:0044425)
[truncated: 4,153 more rows]
