# Supplementary material for: Reactive oxygen species-related genes participate in resistance to cucumber green mottle mosaic virus infection regulated by boron in Nicotiana benthamiana and watermelon
Source: Front Plant Sci. 2022 Nov 11;13:1027404. doi: 10.3389/fpls.2022.1027404 (PMC9691971; doi:10.3389/fpls.2022.1027404)
Supplement: Supplementary file 6 [file Table_5.xlsx]

## Sheet: Sheet1
Supplementary Table 5. GO analysis of DEGs in P+H vs C+H and C+H vs C+B.
GO analysis of DEGs in P+H vs C+H.
#GO_classify1	GO_classify2	All gene	DE gene	Genes
#Total_gene		36400	2434
cellular component	extracellular region	838	80	Niben101Scf01453g06003;Niben101Scf04869g03002;Niben101Scf06799g01001;Niben101Scf09711g00005;Niben101Scf02854g11002;Niben101Ctg13736g00004;Niben101Scf02575g02010;Niben101Scf15065g00001;Niben101Scf00487g06021;Niben101Scf39295g00002;Niben101Scf01789g03003;Niben101Scf00640g04021;Niben101Scf08637g00009;Niben101Scf01001g00005;Niben101Scf07073g02007;Niben101Scf00119g01002;Niben101Scf00176g09013;Niben101…
cellular component	cell	18827	1315	Niben101Scf00157g07009;Niben101Scf01634g07023;Niben101Scf02602g00001;Niben101Scf06913g00001;Niben101Scf00823g00002;Niben101Scf02433g00011;Niben101Scf03577g01001;Niben101Scf06120g00013;Niben101Scf05438g03004;Niben101Scf01719g08010;Niben101Scf01438g08004;Niben101Scf09127g01005;Niben101Scf01018g02004;Niben101Scf11604g00006;Niben101Ctg15435g00001;Niben101Scf02030g01004;Niben101Scf05688g08010;Niben101…
cellular component	nucleoid	52	6	Niben101Scf11670g01002;Niben101Scf07825g06017;Niben101Scf02026g02002;Niben101Scf08041g01021;Niben101Scf00487g06021;Niben101Scf05278g01015
cellular component	membrane	13595	996	Niben101Scf03481g00014;Niben101Scf08653g07017;Niben101Scf02832g04001;Niben101Scf05151g03019;Niben101Scf01954g01001;Niben101Scf01328g01012;Niben101Scf02039g00006;Niben101Scf10132g01027;Niben101Scf06919g00006;Niben101Scf13478g00001;Niben101Scf09960g01010;Niben101Scf04930g00006;Niben101Scf04141g01002;Niben101Scf01775g00007;Niben101Scf04786g01004;Niben101Scf02511g05004;Niben101Scf00290g00017;Niben101…
cellular component	virion	56	3	Niben101Scf10450g00012;Niben101Scf01782g05006;Niben101Scf03573g00017
cellular component	cell junction	499	36	Niben101Scf02395g02002;Niben101Scf03335g01010;Niben101Scf02264g05016;Niben101Scf13776g02016;Niben101Scf00207g02007;Niben101Scf03648g04010;Niben101Scf00165g01004;Niben101Scf07404g04001;Niben101Scf11814g00005;Niben101Scf03141g10006;Niben101Scf03565g00008;Niben101Scf00571g10002;Niben101Scf01781g01002;Niben101Scf01799g00001;Nicotiana_benthamiana_newGene_18521;Niben101Scf05804g02004;Niben101Scf04623g0…
cellular component	membrane-enclosed lumen	1215	55	Niben101Scf04760g00010;Niben101Scf06996g02040;Niben101Scf00663g02007;Niben101Scf05969g01002;Niben101Scf07048g02008;Niben101Scf02015g01022;Niben101Scf00005g01008;Niben101Scf01150g03001;Niben101Scf08137g03002;Niben101Scf10438g00008;Niben101Scf07026g00016;Niben101Scf01827g02008;Niben101Scf01343g00015;Niben101Scf03944g02014;Niben101Scf00780g02003;Niben101Scf09516g00022;Niben101Scf02395g02002;Niben101…
cellular component	macromolecular complex	4834	282	Niben101Scf16244g02026;Niben101Scf16437g00002;Niben101Ctg16216g00002;Niben101Scf04760g00010;Niben101Scf07510g00017;Niben101Scf07672g00015;Niben101Scf27876g00001;Niben101Scf08975g01010;Niben101Scf11852g00012;Niben101Scf01677g06002;Niben101Scf33716g00003;Niben101Scf00607g03013;Niben101Scf05047g04011;Niben101Ctg14049g00002;Niben101Scf02164g02003;Niben101Scf03961g00003;Niben101Scf03455g01006;Niben101…
cellular component	organelle	13527	946	Niben101Scf11767g01011;Niben101Scf02605g00002;Niben101Scf02749g01001;Niben101Scf09516g00022;Niben101Scf02147g01005;Niben101Scf00981g03004;Niben101Scf00505g03002;Niben101Scf05226g04004;Niben101Scf01827g02007;Niben101Scf14955g00009;Niben101Scf04028g02018;Niben101Scf04447g01001;Niben101Scf05307g00001;Niben101Scf07672g00014;Niben101Scf02702g00005;Niben101Scf02351g07005;Niben101Scf15372g00003;Niben101…
cellular component	extracellular region part	122	12	Niben101Scf01143g11007;Niben101Scf02023g02007;Niben101Scf01001g00004;Niben101Scf01001g00005;Niben101Scf04869g03002;Niben101Scf02422g01012;Niben101Scf02763g05012;Niben101Ctg13736g00004;Niben101Scf01001g00003;Niben101Scf02575g02010;Niben101Scf05035g01005;Niben101Scf02853g06021
cellular component	organelle part	6053	459	Niben101Scf06058g00016;Niben101Scf00167g04011;Niben101Scf08806g01007;Niben101Scf01827g02008;Nicotiana_benthamiana_newGene_18521;Niben101Scf00264g03023;Niben101Scf07728g02014;Niben101Scf02175g03014;Niben101Scf05989g00012;Niben101Scf36540g00003;Niben101Scf00005g01008;Niben101Scf04504g03012;Niben101Scf12318g00006;Niben101Scf01664g02022;Niben101Scf00369g07016;Niben101Scf07508g03004;Niben101Scf01478g0…
cellular component	virion part	56	3	Niben101Scf03573g00017;Niben101Scf01782g05006;Niben101Scf10450g00012
cellular component	membrane part	10950	792	Niben101Scf01192g00009;Niben101Scf06809g00033;Niben101Scf02110g00011;Niben101Scf04138g01012;Niben101Scf15187g03007;Niben101Scf01406g02008;Niben101Scf06397g02002;Niben101Scf05152g03001;Niben101Scf02459g10008;Niben101Ctg09679g00001;Niben101Scf04643g01003;Niben101Scf04529g00005;Niben101Scf00436g04003;Niben101Scf02513g07008;Niben101Scf15391g05004;Niben101Scf13530g01008;Niben101Scf00063g10008;Niben101…
cellular component	cell part	18697	1302	Niben101Scf01182g06005;Niben101Scf00398g00002;Niben101Scf07284g02002;Niben101Scf03169g05002;Niben101Scf06809g00030;Niben101Scf05395g04016;Niben101Scf00578g00008;Niben101Scf04276g04020;Niben101Scf05732g00014;Niben101Scf01978g01006;Niben101Scf08723g02015;Niben101Scf04329g02003;Niben101Scf08791g03011;Niben101Scf07023g00001;Niben101Scf03080g01015;Niben101Scf04529g00012;Niben101Scf13411g05020;Niben101…
cellular component	symplast	499	36	Niben101Scf00640g04021;Niben101Scf04711g00016;Niben101Scf39295g00002;Niben101Scf08653g07017;Niben101Scf00542g01003;Niben101Scf03396g07029;Niben101Scf34287g00002;Niben101Scf07451g01004;Niben101Scf00119g01002;Niben101Scf03422g01002;Niben101Scf03380g03005;Niben101Scf04386g04007;Niben101Scf01109g04005;Niben101Scf05385g02008;Niben101Scf09846g02023;Niben101Scf04623g01006;Niben101Scf02854g11002;Niben101…
cellular component	supramolecular complex	189	12	Niben101Scf02217g03003;Niben101Scf06172g04003;Niben101Ctg16325g00005;Niben101Scf01326g05008;Niben101Scf01235g00012;Niben101Scf01073g07011;Niben101Scf02836g03016;Niben101Scf16437g00002;Niben101Scf07645g00004;Niben101Scf06186g07020;Niben101Scf01191g02010;Niben101Scf09127g01001
molecular function	transcription factor activity, protein binding	171	15	Niben101Scf01696g06050;Niben101Scf00471g00013;Niben101Scf03426g00005;Niben101Scf02594g10016;Niben101Scf03253g01020;Niben101Scf05483g01007;Niben101Scf05063g04023;Niben101Scf02854g03003;Niben101Scf02511g05005;Niben101Scf01940g00011;Niben101Scf03154g00005;Niben101Scf00215g05003;Niben101Scf16613g04003;Niben101Scf08149g01007;Niben101Ctg15836g00002
molecular function	nucleic acid binding transcription factor activity	958	70	Niben101Scf04995g04005;Niben101Scf02439g00023;Niben101Scf01035g04005;Niben101Scf03614g00004;Niben101Scf02688g00009;Niben101Scf08149g01007;Niben101Scf07063g00001;Niben101Scf10191g01007;Niben101Scf00262g04006;Niben101Scf05483g01007;Niben101Scf00199g05004;Niben101Scf10974g01004;Niben101Scf01142g04009;Niben101Scf12841g03023;Niben101Scf00715g09001;Niben101Scf08791g03011;Niben101Scf01143g03005;Niben101…
molecular function	catalytic activity	16551	1164	Niben101Scf02927g04002;Niben101Scf02749g04008;Niben101Scf11684g00005;Niben101Scf01521g02013;Niben101Scf02348g00008;Niben101Scf02994g03003;Niben101Scf02537g02023;Niben101Scf05387g02004;Niben101Scf19423g00008;Niben101Scf05676g06014;Niben101Scf01006g03016;Niben101Scf04739g00001;Niben101Scf02381g04022;Niben101Scf00579g01004;Niben101Scf01143g07002;Niben101Scf02217g03003;Niben101Scf08797g00012;Niben101…
molecular function	signal transducer activity	329	15	Niben101Scf08855g02013;Niben101Scf00747g12035;Niben101Scf33716g00003;Niben101Scf05434g00017;Niben101Scf17398g00008;Niben101Scf05200g00003;Niben101Scf09260g03002;Niben101Scf00941g02003;Niben101Scf01018g02004;Niben101Scf00165g01004;Niben101Scf02217g06006;Niben101Scf13549g00004;Niben101Scf02280g02004;Niben101Scf01109g04005;Niben101Scf02171g00008
molecular function	structural molecule activity	1399	45	Niben101Scf05142g00023;Niben101Scf01164g00011;Niben101Scf04529g00011;Niben101Scf08030g00013;Niben101Scf03283g04012;Niben101Scf00966g01006;Niben101Scf01478g00014;Niben101Scf06172g04003;Niben101Scf03488g09019;Niben101Scf03595g10007;Niben101Scf00858g01009;Niben101Scf03236g02004;Niben101Scf01384g00008;Niben101Scf06171g00001;Niben101Scf09742g00031;Niben101Scf11178g02002;Niben101Scf03756g02016;Niben101…
molecular function	transporter activity	2513	194	Niben101Scf01510g00023;Niben101Scf06442g00032;Niben101Scf01323g02005;Niben101Scf01323g05008;Niben101Scf01951g01008;Niben101Scf00472g05017;Niben101Scf29015g00010;Niben101Scf27305g00001;Niben101Scf01791g00001;Niben101Scf05166g01022;Niben101Scf09392g00004;Niben101Scf16448g00006;Niben101Scf02572g02024;Niben101Scf02511g05004;Niben101Scf00167g04017;Niben101Scf08819g01014;Niben101Scf04529g00005;Niben101…
molecular function	binding	17307	1134	Niben101Scf06876g01028;Niben101Scf00920g09027;Niben101Scf04740g00007;Niben101Scf00683g03030;Niben101Scf13199g00011;Niben101Scf02164g02003;Niben101Scf11214g00007;Niben101Scf01402g00003;Niben101Scf04364g01003;Niben101Scf10032g00002;Niben101Scf03842g05002;Niben101Scf01369g05023;Niben101Scf13916g00008;Niben101Scf07640g01014;Niben101Scf02705g02021;Niben101Scf00417g00008;Niben101Scf02322g07001;Niben101…
molecular function	electron carrier activity	485	46	Niben101Scf01642g03011;Niben101Scf04763g02009;Niben101Scf02510g04002;Niben101Scf00901g06008;Nicotiana_benthamiana_newGene_6976;Niben101Scf04328g00044;Niben101Scf11684g03001;Niben101Scf03937g00009;Niben101Scf07170g02006;Niben101Scf00526g01006;Niben101Scf11178g01005;Niben101Scf15979g01004;Niben101Scf20325g00012;Niben101Scf09149g01005;Niben101Scf03929g04002;Niben101Scf19315g00010;Niben101Scf02995g00…
molecular function	antioxidant activity	304	32	Niben101Scf06799g01001;Nicotiana_benthamiana_newGene_18342;Niben101Scf01453g06003;Niben101Scf14996g00009;Niben101Scf06912g01020;Niben101Scf01721g07003;Niben101Scf02041g04015;Niben101Scf08020g01012;Niben101Scf10468g00012;Niben101Scf13916g00008;Niben101Scf05682g00011;Niben101Scf02367g05038;Niben101Scf01759g04008;Niben101Scf04174g01008;Niben101Scf11767g02018;Niben101Scf00163g08018;Niben101Scf02526g0…
molecular function	metallochaperone activity	8	3	Niben101Scf11604g00006;Niben101Scf02511g03013;Niben101Scf06912g01020
molecular function	protein tag	9	0
molecular function	nutrient reservoir activity	72	2	Niben101Scf02749g04008;Niben101Scf00493g00020
molecular function	molecular transducer activity	163	6	Niben101Scf01897g07006;Niben101Scf00941g02003;Niben101Scf09260g03002;Niben101Scf10735g00018;Niben101Scf14320g00010;Niben101Scf08855g02013
molecular function	molecular function regulator	591	33	Niben101Scf05385g01015;Niben101Scf09242g02014;Niben101Scf14320g00010;Niben101Scf00448g18001;Niben101Scf03595g10007;Niben101Scf01917g08001;Niben101Scf14955g00009;Niben101Scf10384g02008;Niben101Scf01478g00014;Niben101Scf02422g01012;Niben101Scf07672g00014;Niben101Scf11490g00015;Niben101Scf02658g01008;Niben101Scf07672g00015;Niben101Scf09817g02004;Niben101Scf03164g07004;Niben101Scf03733g01009;Niben101…
biological process	reproduction	743	48	Niben101Scf03147g02010;Niben101Scf05787g00005;Niben101Scf00780g01029;Niben101Scf07223g02009;Niben101Scf05193g00003;Niben101Scf04072g01001;Niben101Scf07451g01004;Niben101Scf07465g02002;Niben101Scf00436g00003;Niben101Scf08637g00009;Niben101Scf08653g07017;Niben101Scf00640g04021;Niben101Scf02509g05007;Niben101Scf02857g04002;Niben101Scf09458g00004;Niben101Scf04817g00017;Niben101Scf05231g02020;Niben101…
biological process	cell killing	23	2	Nicotiana_benthamiana_newGene_14017;Niben101Scf04016g00009
biological process	immune system process	138	10	Niben101Scf01189g00001;Niben101Scf01001g00004;Niben101Scf01001g00005;Niben101Scf04869g03002;Niben101Scf02763g05012;Niben101Scf04141g01002;Niben101Ctg13736g00004;Niben101Scf01001g00003;Niben101Scf09264g00009;Niben101Scf00248g02011
biological process	metabolic process	17915	1260	Niben101Scf04225g02007;Niben101Scf02461g04014;Niben101Scf01789g02015;Niben101Scf04738g03003;Niben101Scf03046g04015;Niben101Scf09561g00003;Niben101Scf12541g00004;Niben101Ctg15836g00002;Niben101Scf00409g00002;Niben101Scf05434g00017;Niben101Scf07187g01002;Niben101Ctg06906g00002;Niben101Scf00897g03002;Niben101Scf11685g00011;Niben101Scf06091g07004;Niben101Scf09321g01008;Niben101Scf01569g04006;Niben101…
biological process	cellular process	17318	1165	Niben101Scf04198g01001;Niben101Scf04941g03017;Niben101Scf00773g11002;Niben101Scf04793g01008;Niben101Scf04384g00010;Nicotiana_benthamiana_newGene_14225;Niben101Scf02511g05005;Niben101Scf11384g00027;Niben101Scf02764g05013;Niben101Scf11860g00007;Niben101Scf05972g02009;Niben101Scf08065g00002;Niben101Scf08133g00002;Niben101Scf01764g03018;Niben101Scf01054g02001;Niben101Scf00772g00003;Niben101Scf08819g0…
biological process	reproductive process	736	48	Niben101Scf00780g01029;Niben101Scf07223g02009;Niben101Scf05787g00005;Niben101Scf03147g02010;Niben101Scf00640g04021;Niben101Scf08653g07017;Niben101Scf07465g02002;Niben101Scf00436g00003;Niben101Scf08637g00009;Niben101Scf05193g00003;Niben101Scf04072g01001;Niben101Scf07451g01004;Niben101Scf04817g00017;Niben101Scf02857g04002;Niben101Scf02509g05007;Niben101Scf09458g00004;Niben101Scf00739g01009;Niben101…
biological process	biological adhesion	7	0
biological process	signaling	1427	83	Niben101Scf03809g02013;Niben101Scf08855g02013;Niben101Scf01677g02003;Niben101Scf04174g01008;Niben101Scf05434g00017;Niben101Scf05200g00003;Niben101Scf13411g01001;Niben101Scf06734g02027;Niben101Scf04104g05004;Niben101Scf12841g03023;Niben101Scf07465g02002;Niben101Scf01001g05001;Niben101Scf02445g10019;Niben101Scf01897g07006;Niben101Scf07019g01004;Niben101Scf04225g02002;Niben101Scf00103g04008;Niben101…
biological process	multicellular organismal process	1274	87	Niben101Scf01259g09006;Niben101Scf25069g01006;Niben101Scf20176g00007;Niben101Scf08791g03011;Niben101Scf08942g00013;Niben101Scf01611g00004;Niben101Scf12516g02006;Niben101Scf11126g02001;Niben101Scf02404g01007;Niben101Scf00679g07004;Niben101Scf03191g01013;Niben101Scf06101g00013;Nicotiana_benthamiana_newGene_18521;Niben101Scf00152g20002;Niben101Scf01692g01003;Niben101Scf02540g00013;Niben101Scf02348g0…
biological process	developmental process	1378	98	Niben101Scf01326g05006;Niben101Scf04217g02012;Niben101Scf02420g03014;Niben101Scf06906g00001;Niben101Scf07482g00003;Niben101Scf00831g02021;Niben101Scf02509g05007;Niben101Scf01035g04005;Niben101Scf08637g00009;Niben101Scf01255g00001;Niben101Scf07465g02002;Niben101Scf13393g00004;Niben101Scf00199g05004;Niben101Scf00640g04021;Niben101Scf08653g07017;Niben101Scf07206g01006;Niben101Scf00530g06018;Niben101…
biological process	growth	207	6	Niben101Scf05618g03008;Niben101Scf05060g07004;Niben101Scf02857g04002;Niben101Scf01259g09006;Niben101Scf08721g01032;Niben101Scf01500g01020
biological process	locomotion	18	1	Niben101Scf08942g00013
biological process	single-organism process	11890	939	Niben101Scf01235g00012;Niben101Scf03046g04015;Niben101Scf04072g01001;Niben101Scf00669g00008;Niben101Scf04738g03003;Niben101Scf04537g01009;Niben101Scf10468g00012;Niben101Scf01718g07005;Niben101Scf00530g06018;Niben101Scf11685g00011;Niben101Scf06091g07004;Niben101Scf00897g03002;Niben101Ctg06906g00002;Niben101Scf07187g01002;Niben101Scf00408g00002;Niben101Scf05434g00017;Niben101Scf00409g00002;Niben101…
biological process	rhythmic process	12	0
biological process	response to stimulus	4204	338	Niben101Scf09217g01009;Niben101Scf01001g05001;Niben101Scf18643g00022;Niben101Scf02445g10019;Niben101Scf08020g01012;Niben101Scf07465g02002;Niben101Ctg13927g00002;Niben101Scf03147g10015;Niben101Scf13411g01001;Niben101Scf05200g00003;Niben101Scf04174g01008;Niben101Scf01677g02003;Niben101Scf02367g05038;Niben101Scf05621g09002;Niben101Scf03263g03004;Niben101Scf05955g03041;Niben101Scf00887g00009;Niben101…
biological process	localization	4503	273	Niben101Scf09127g01005;Niben101Scf01719g08010;Niben101Scf13966g00013;Niben101Scf00193g03008;Niben101Scf06318g00005;Niben101Scf00488g01002;Niben101Scf02562g04001;Niben101Scf07168g00003;Niben101Scf02662g00003;Niben101Scf15366g00017;Niben101Scf14028g02012;Niben101Scf01384g00008;Niben101Scf05619g00015;Niben101Scf11604g00006;Niben101Scf02207g05012;Niben101Scf11978g04001;Niben101Scf13680g03001;Niben101…
biological process	multi-organism process	490	27	Niben101Scf09264g00009;Niben101Scf05730g00011;Niben101Scf00248g02011;Niben101Scf01259g09006;Niben101Scf06042g03021;Niben101Scf08942g00013;Niben101Scf04817g00017;Niben101Scf01555g02004;Niben101Scf04205g04013;Niben101Scf13776g02016;Niben101Scf06101g00013;Niben101Scf04016g00009;Niben101Scf14523g00003;Niben101Scf08855g02013;Niben101Scf03990g00010;Niben101Scf09260g03002;Niben101Scf00780g01029;Niben101…
biological process	biological regulation	5991	424	Niben101Scf00682g05009;Niben101Scf03300g02006;Niben101Scf03614g00004;Niben101Scf01372g05004;Niben101Scf06912g01020;Niben101Scf00679g08006;Niben101Scf07027g00009;Niben101Scf06094g06005;Niben101Scf02572g02024;Niben101Scf04796g00025;Niben101Scf00472g05017;Niben101Ctg12456g00002;Niben101Scf08465g02007;Niben101Scf00436g04003;Niben101Scf04104g05004;Niben101Scf06734g02027;Niben101Scf00022g04003;Niben101…
biological process	cellular component organization or biogenesis	3503	194	Niben101Scf00463g00016;Niben101Scf14650g00005;Niben101Scf05483g01007;Niben101Scf00176g09013;Niben101Scf06788g00019;Niben101Scf07034g08030;Niben101Scf02632g03006;Niben101Scf00436g04003;Niben101Scf00220g05001;Niben101Scf09711g00005;Niben101Scf29015g00010;Niben101Scf09467g02008;Niben101Scf08465g02007;Niben101Scf01453g06003;Niben101Scf04988g02019;Niben101Scf02572g02024;Niben101Scf06848g10001;Niben101…
biological process	detoxification	348	38	Niben101Scf01453g06003;Niben101Scf03263g03004;Nicotiana_benthamiana_newGene_18342;Niben101Scf06799g01001;Niben101Scf02041g04015;Niben101Scf01721g07003;Niben101Scf06912g01020;Niben101Scf14996g00009;Niben101Scf05682g00011;Niben101Scf13916g00008;Niben101Scf10468g00012;Niben101Scf08020g01012;Niben101Scf03147g10015;Niben101Scf04174g01008;Niben101Scf00897g03002;Niben101Scf01759g04008;Niben101Scf02367g0…
GO analysis of DEGs in C+H vs C+B.
#GO_classify1	GO_classify2	All gene	DE gene	Genes
#Total_gene		36400	841
cellular component	extracellular region	838	37	Niben101Scf07244g01004;Niben101Scf03128g07024;Niben101Scf02413g03022;Niben101Scf15972g02029;Niben101Scf08338g00001;Niben101Scf00974g02010;Niben101Scf00369g05011;Niben101Scf01685g12005;Niben101Ctg13782g00003;Niben101Scf23606g00005;Niben101Scf01781g01002;Niben101Scf15065g00001;Niben101Scf07244g00001;Niben101Scf14877g01011;Niben101Scf06275g03011;Niben101Scf03460g04004;Niben101Scf01143g11007;Niben101…
cellular component	cell	18827	386	Niben101Scf11232g01012;Niben101Scf05301g04003;Niben101Scf01750g15002;Niben101Scf00414g10003;Niben101Scf04003g01002;Niben101Scf08704g01003;Niben101Scf02182g03001;Niben101Scf01341g00002;Niben101Scf07162g03019;Niben101Scf11417g00013;Niben101Scf00897g03002;Niben101Scf01660g00007;Niben101Scf00080g05006;Niben101Scf08156g01001;Niben101Scf00713g04014;Niben101Scf03282g05005;Niben101Scf15979g02003;Niben101…
cellular component	nucleoid	52	0
cellular component	membrane	13595	303	Niben101Scf00381g06004;Niben101Scf04841g00035;Niben101Scf01870g03002;Niben101Scf01372g09018;Niben101Scf03693g05006;Niben101Scf03363g01019;Niben101Scf03913g01045;Niben101Scf01738g02011;Niben101Scf06999g01006;Niben101Scf10032g00002;Niben101Scf00751g00001;Niben101Scf13842g01001;Niben101Scf00408g00002;Niben101Scf01093g04004;Niben101Scf00974g01018;Niben101Scf00616g02014;Niben101Scf02543g04011;Niben101…
cellular component	virion	56	0
cellular component	cell junction	499	23	Niben101Scf08020g06001;Niben101Scf34287g00002;Niben101Scf01799g00001;Niben101Scf04181g00031;Niben101Scf03141g10006;Niben101Scf02792g02012;Niben101Scf00640g04021;Niben101Scf11424g02004;Niben101Scf39295g00002;Niben101Scf05385g02008;Niben101Scf02411g00007;Niben101Scf04711g00016;Niben101Scf02767g04005;Niben101Scf00165g01004;Niben101Scf09846g02023;Niben101Scf04817g00017;Niben101Scf03335g01010;Niben101…
cellular component	membrane-enclosed lumen	1215	6	Niben101Scf11424g02004;Niben101Scf13622g00006;Niben101Scf02217g03003;Niben101Scf01073g04022;Niben101Scf04003g04002;Niben101Scf02182g03001
cellular component	macromolecular complex	4834	52	Niben101Scf01372g05004;Niben101Scf09475g01017;Niben101Scf11126g00004;Niben101Scf10855g08005;Niben101Scf10431g00014;Niben101Scf11936g01017;Niben101Scf02182g03001;Niben101Scf00428g08008;Niben101Scf07162g03019;Niben101Scf05694g00009;Niben101Scf02299g02013;Niben101Scf07672g00014;Niben101Scf08175g00008;Niben101Scf03335g01010;Niben101Scf05060g02003;Niben101Scf08034g01002;Niben101Scf09523g01007;Niben101…
cellular component	organelle	13527	241	Niben101Scf02482g01016;Niben101Scf00090g08011;Niben101Scf03570g02009;Niben101Scf06467g01006;Niben101Scf03012g03021;Niben101Scf03329g01002;Niben101Scf06658g00002;Niben101Scf12969g00003;Niben101Scf07554g01010;Niben101Scf01752g05003;Niben101Scf10732g01014;Niben101Scf01660g02014;Niben101Scf04993g05001;Niben101Scf07482g00003;Niben101Ctg13703g00001;Niben101Scf03647g03024;Niben101Scf07825g02003;Niben101…
cellular component	extracellular region part	122	4	Niben101Scf10336g01001;Niben101Scf01143g11007;Niben101Scf02763g05012;Niben101Scf15972g02029
cellular component	organelle part	6053	67	Niben101Scf02836g03016;Niben101Scf02525g05017;Niben101Ctg14049g00002;Niben101Scf14299g00002;Niben101Scf03934g00015;Niben101Scf04003g04002;Niben101Scf03819g02008;Niben101Scf08465g02007;Niben101Scf11424g02004;Niben101Scf13622g00006;Niben101Scf03969g01008;Niben101Scf01154g17005;Niben101Scf01950g03015;Niben101Scf06525g00027;Niben101Scf01478g00014;Niben101Ctg13927g00002;Niben101Scf03710g11002;Niben101…
cellular component	virion part	56	0
cellular component	membrane part	10950	236	Niben101Scf15391g05004;Niben101Scf06172g04005;Niben101Scf03326g01009;Niben101Scf02613g03001;Niben101Scf00157g07009;Niben101Scf10152g04001;Niben101Scf02290g02006;Niben101Scf07395g00028;Niben101Scf00110g05012;Niben101Scf05637g00007;Niben101Scf01409g07004;Niben101Scf02618g03012;Niben101Scf05193g00003;Niben101Scf01154g18011;Niben101Scf03143g05002;Niben101Scf01623g13002;Niben101Scf03374g08019;Niben101…
cellular component	cell part	18697	379	Niben101Scf01143g11007;Niben101Scf15536g03005;Niben101Scf01272g01010;Niben101Scf02222g02007;Niben101Scf03595g08008;Niben101Scf05340g00012;Niben101Scf15192g01004;Niben101Scf03169g04009;Niben101Scf00872g03005;Niben101Scf00802g00005;Niben101Scf04313g01012;Niben101Scf00974g02010;Niben101Scf07436g00006;Niben101Scf06042g01001;Niben101Scf03398g06007;Niben101Scf01639g04001;Niben101Scf03128g07024;Niben101…
cellular component	symplast	499	23	Niben101Scf11424g02004;Niben101Scf00640g04021;Niben101Scf05385g02008;Niben101Scf39295g00002;Niben101Scf02411g00007;Niben101Scf04181g00031;Niben101Scf01799g00001;Niben101Scf34287g00002;Niben101Scf08020g06001;Niben101Scf02792g02012;Niben101Scf03141g10006;Niben101Scf08415g00010;Niben101Scf01781g01002;Niben101Scf03913g01045;Niben101Scf01716g00015;Niben101Scf01899g02003;Niben101Scf02767g04005;Niben101…
cellular component	supramolecular complex	189	9	Niben101Scf00428g08008;Niben101Scf03329g01002;Niben101Scf02217g03003;Niben101Scf02836g03016;Niben101Scf06186g07020;Niben101Scf10157g01024;Niben101Scf03647g03024;Niben101Ctg16325g00005;Niben101Scf07645g00004
molecular function	transcription factor activity, protein binding	171	3	Niben101Scf01777g02001;Niben101Scf03426g00005;Niben101Scf14662g01006
molecular function	nucleic acid binding transcription factor activity	958	66	Niben101Scf04654g04001;Niben101Scf00627g00003;Niben101Scf00872g03005;Niben101Scf04995g04005;Niben101Scf04313g01012;Niben101Scf03398g06007;Niben101Scf01639g04001;Niben101Scf00163g22002;Niben101Scf06996g02005;Niben101Scf05056g00004;Niben101Scf12210g07001;Niben101Scf03240g00008;Niben101Scf14662g01006;Niben101Scf00199g05004;Niben101Scf01721g08007;Niben101Scf13779g00003;Niben101Scf00788g03016;Niben101…
molecular function	catalytic activity	16551	381	Niben101Scf05880g02003;Niben101Scf01124g24003;Niben101Scf07645g00004;Niben101Scf06344g05003;Niben101Scf15065g00001;Niben101Scf02562g01010;Niben101Scf10032g01004;Niben101Scf02541g04005;Niben101Scf09846g01010;Niben101Scf12672g00005;Niben101Scf14996g00009;Niben101Scf05948g04002;Niben101Scf00539g04003;Niben101Scf08338g00001;Niben101Scf03934g00015;Niben101Scf08029g01007;Nicotiana_benthamiana_newGene_6…
molecular function	signal transducer activity	329	13	Niben101Scf02217g06006;Niben101Scf09928g01023;Niben101Scf05434g00017;Niben101Scf08624g00006;Niben101Scf04003g01002;Niben101Scf01249g04006;Niben101Scf11417g00013;Niben101Scf00747g12032;Niben101Scf00165g01004;Niben101Scf02171g00008;Niben101Scf08020g06001;Niben101Scf00747g12035;Niben101Scf06499g00001
molecular function	structural molecule activity	1399	12	Niben101Scf16244g02026;Niben101Scf01478g00014;Niben101Scf03329g01002;Niben101Scf07127g00003;Niben101Scf05060g02003;Niben101Scf05583g00006;Niben101Scf00503g06003;Niben101Scf03647g03024;Niben101Scf10732g01014;Niben101Scf10431g00014;Niben101Scf14299g00002;Niben101Scf10053g00011
molecular function	transporter activity	2513	55	Niben101Scf01141g04003;Niben101Scf01203g01008;Niben101Scf02618g03012;Niben101Scf05189g00002;Niben101Scf02041g04015;Niben101Scf14144g01017;Niben101Scf00936g02010;Niben101Scf02525g05017;Niben101Scf00369g15012;Niben101Scf05112g00010;Niben101Scf06172g04005;Niben101Scf02658g05007;Niben101Scf03020g00009;Niben101Scf07395g00029;Niben101Scf14458g00009;Niben101Scf00819g08010;Niben101Scf00542g04001;Nicotian…
molecular function	binding	17307	440	Niben101Scf10999g00004;Niben101Scf05137g01028;Niben101Scf03577g01001;Niben101Scf00779g06009;Niben101Scf00530g10010;Niben101Scf00338g10009;Niben101Scf04082g02014;Niben101Scf09321g02026;Niben101Scf06376g05031;Niben101Scf04187g00028;Niben101Scf12935g00041;Niben101Scf00522g01017;Niben101Scf03214g00006;Niben101Scf02044g00010;Niben101Scf05245g02003;Niben101Scf08211g03014;Niben101Scf00282g02006;Niben101…
molecular function	electron carrier activity	485	13	Niben101Scf01326g07007;Niben101Scf04989g03001;Niben101Scf05233g00012;Niben101Scf03446g12003;Niben101Scf02124g01022;Niben101Scf09445g04020;Niben101Scf06172g04009;Niben101Scf01830g01024;Niben101Scf02838g07002;Niben101Scf07578g00004;Niben101Scf00823g00002;Niben101Scf03937g00009;Niben101Scf01642g03011
molecular function	antioxidant activity	304	13	Niben101Scf03460g04004;Niben101Scf03990g00010;Niben101Scf00751g00001;Niben101Scf05649g01008;Niben101Ctg12033g00001;Niben101Ctg10591g00003;Niben101Scf04174g01008;Niben101Scf14996g00009;Niben101Scf11767g02018;Niben101Scf01721g07003;Niben101Scf06602g00001;Niben101Scf08338g00001;Niben101Scf02041g04015
molecular function	metallochaperone activity	8	0
molecular function	protein tag	9	0
molecular function	nutrient reservoir activity	72	0
molecular function	molecular transducer activity	163	3	Niben101Scf06499g00001;Niben101Scf10735g00018;Niben101Scf00747g12032
molecular function	molecular function regulator	591	6	Niben101Scf09186g00006;Niben101Scf03203g02001;Niben101Scf06639g01008;Niben101Scf10735g00018;Niben101Scf01478g00014;Niben101Scf07672g00014
biological process	reproduction	743	20	Niben101Scf06101g00013;Niben101Scf00640g04021;Niben101Scf05193g00003;Niben101Scf07223g02009;Niben101Scf08702g02005;Niben101Scf05137g01028;Niben101Scf02411g00007;Niben101Scf00152g20002;Niben101Scf04448g02011;Niben101Scf00436g00003;Niben101Scf05787g00005;Niben101Scf01380g01021;Niben101Scf03913g01045;Niben101Scf08415g00010;Niben101Scf06172g04005;Niben101Scf00679g07004;Niben101Scf02050g00011;Niben101…
biological process	cell killing	23	4	Niben101Scf04016g00009;Niben101Scf06275g03011;Niben101Scf06275g03010;Nicotiana_benthamiana_newGene_14017
biological process	immune system process	138	4	Niben101Scf05948g04002;Niben101Scf09604g01004;Niben101Scf02763g05012;Niben101Scf02411g00007
biological process	metabolic process	17915	373	Niben101Scf01423g01005;Niben101Scf03012g03021;Niben101Ctg12033g00001;Niben101Scf00449g00004;Niben101Scf09541g00005;Niben101Scf02482g01016;Niben101Scf13622g01020;Niben101Scf00176g09013;Niben101Scf01143g07002;Niben101Scf01258g02001;Niben101Scf08624g00006;Niben101Scf16197g03005;Niben101Scf08835g00007;Niben101Scf10732g01014;Niben101Scf04010g01005;Niben101Scf01660g02014;Nicotiana_benthamiana_newGene_1…
biological process	cellular process	17318	368	Niben101Scf01514g00004;Niben101Scf06684g01005;Niben101Scf00311g02004;Niben101Scf07395g00031;Niben101Scf00573g00010;Niben101Scf08039g01005;Niben101Scf08150g00004;Niben101Scf08546g05002;Niben101Scf01764g03018;Niben101Scf08510g01006;Niben101Scf04422g00011;Niben101Scf07236g00011;Niben101Scf08478g02009;Niben101Scf09523g01007;Niben101Scf11447g02007;Niben101Scf04739g00001;Niben101Scf02763g05012;Niben101…
biological process	reproductive process	736	20	Niben101Scf06172g04005;Niben101Scf03913g01045;Niben101Scf08415g00010;Niben101Scf00679g07004;Niben101Scf02050g00011;Niben101Scf04072g01001;Niben101Scf02832g01021;Niben101Scf04817g00017;Niben101Scf05193g00003;Niben101Scf00640g04021;Niben101Scf06101g00013;Niben101Scf00152g20002;Niben101Scf02411g00007;Niben101Scf05787g00005;Niben101Scf04448g02011;Niben101Scf00436g00003;Niben101Scf07223g02009;Niben101…
biological process	biological adhesion	7	0
biological process	signaling	1427	44	Niben101Scf01249g04006;Niben101Scf08546g03002;Niben101Scf09345g00003;Niben101Scf08546g05002;Niben101Scf04003g01002;Niben101Scf03570g04001;Niben101Scf05434g00017;Niben101Scf04174g01008;Niben101Scf00747g12035;Niben101Scf04234g01007;Niben101Scf00745g02015;Niben101Scf11417g00013;Niben101Scf01752g05003;Niben101Scf15752g00002;Niben101Scf08546g05004;Niben101Scf04386g02001;Niben101Scf10316g03004;Niben101…
biological process	multicellular organismal process	1274	33	Niben101Scf11126g00004;Niben101Scf00530g06018;Niben101Scf08415g00010;Niben101Scf02050g00011;Niben101Scf00807g03030;Niben101Scf00428g08008;Niben101Scf02832g01021;Niben101Scf01873g01004;Niben101Scf07482g00003;Niben101Scf06101g00013;Niben101Scf05787g00005;Niben101Scf05137g01028;Niben101Scf08702g02005;Niben101Scf05060g07004;Niben101Scf07223g02009;Niben101Scf02017g03004;Niben101Scf01500g01020;Niben101…
biological process	developmental process	1378	30	Niben101Scf00679g07004;Niben101Scf08415g00010;Niben101Scf02823g04001;Niben101Scf06172g04005;Niben101Scf00530g06018;Niben101Scf11126g00004;Niben101Scf12516g02006;Niben101Scf11108g00011;Niben101Scf01873g01004;Niben101Scf02375g06001;Niben101Scf02832g01021;Niben101Scf00428g08008;Niben101Scf00199g05004;Niben101Scf00807g03030;Niben101Scf07223g02009;Niben101Scf03934g00015;Niben101Scf05060g07004;Niben101…
biological process	growth	207	4	Niben101Scf01500g01020;Niben101Scf05060g07004;Niben101Scf02945g01001;Niben101Scf24679g00011
biological process	locomotion	18	0
biological process	single-organism process	11890	287	Niben101Scf06180g00015;Niben101Scf05307g00001;Niben101Scf03460g04004;Niben101Scf08196g01001;Niben101Scf00819g08010;Niben101Scf06068g01005;Niben101Ctg16325g00005;Niben101Scf02613g03001;Niben101Scf01721g07003;Niben101Scf03326g01009;Niben101Scf01241g02002;Niben101Scf04995g04005;Niben101Scf08873g01022;Niben101Scf02543g01008;Niben101Scf03147g10015;Niben101Scf01642g03011;Niben101Scf03191g01013;Niben101…
biological process	rhythmic process	12	0
biological process	response to stimulus	4204	136	Niben101Ctg12033g00001;Niben101Scf00747g12032;Niben101Scf05437g04015;Niben101Scf02482g01016;Niben101Scf08624g00006;Niben101Scf03224g10009;Niben101Scf01752g05003;Niben101Scf00870g00003;Niben101Scf10316g03004;Niben101Scf07160g00025;Niben101Scf05483g08004;Niben101Scf00745g02015;Niben101Scf05649g01008;Niben101Scf02085g26009;Niben101Scf01429g00010;Niben101Scf03426g00005;Niben101Scf00747g12035;Niben101…
biological process	localization	4503	97	Niben101Scf00163g04004;Niben101Scf01870g03002;Niben101Scf09401g01007;Niben101Scf09392g00004;Niben101Scf05717g02005;Niben101Scf00577g08003;Niben101Scf01478g05006;Niben101Scf00713g04014;Niben101Scf00262g01003;Niben101Scf01738g02011;Niben101Scf11480g02007;Niben101Scf09282g00004;Niben101Scf00414g10003;Niben101Scf05011g00001;Niben101Scf00367g03013;Niben101Scf01249g06014;Niben101Scf02543g04011;Nicotian…
biological process	multi-organism process	490	22	Niben101Scf02050g00011;Niben101Scf04205g04013;Niben101Scf03913g01045;Niben101Scf08415g00010;Niben101Scf04817g00017;Niben101Scf03990g00010;Nicotiana_benthamiana_newGene_14017;Niben101Scf06275g03011;Niben101Scf07242g07006;Niben101Scf04072g01001;Niben101Scf04016g00009;Niben101Scf05137g01028;Niben101Scf01378g00004;Niben101Scf02411g00007;Niben101Scf04448g02011;Niben101Scf05787g00005;Niben101Scf06101g0…
biological process	biological regulation	5991	186	Niben101Scf04290g01001;Niben101Scf05278g05007;Niben101Scf04995g04005;Niben101Scf00627g00003;Niben101Scf09116g01013;Niben101Scf01642g03011;Niben101Scf04654g04001;Niben101Scf00163g22002;Niben101Scf10735g00018;Niben101Scf00741g01012;Niben101Scf13779g00003;Niben101Scf01721g08007;Niben101Scf00199g05004;Niben101Scf14662g01006;Niben101Scf00454g03001;Niben101Scf08196g01001;Niben101Scf02514g01005;Niben101…
biological process	cellular component organization or biogenesis	3503	76	Niben101Scf28230g00019;Niben101Scf09475g01017;Niben101Scf11126g00004;Niben101Scf06602g00001;Niben101Scf00776g04004;Niben101Scf02182g03001;Niben101Scf10431g00014;Niben101Scf06412g03016;Niben101Scf05717g02005;Niben101Scf03990g00010;Niben101Scf06101g00013;Niben101Scf03545g00016;Niben101Scf06639g01008;Niben101Scf00436g00003;Niben101Scf05060g07004;Niben101Scf02886g02004;Niben101Scf11689g03003;Niben101…
biological process	detoxification	348	20	Niben101Scf05649g01008;Niben101Scf02325g03024;Niben101Scf03460g04004;Niben101Scf03990g00010;Niben101Scf00897g03002;Niben101Ctg10591g00003;Niben101Scf08196g01001;Niben101Scf14996g00009;Niben101Scf11767g02018;Niben101Scf04174g01008;Niben101Scf03147g09006;Niben101Scf06602g00001;Niben101Scf01721g07003;Niben101Scf00751g00001;Niben101Scf10316g03003;Niben101Ctg12033g00001;Niben101Scf03147g10015;Niben101…
note: P+H, PBS solution + H2O; P+B, PBS solution + boron; C+H, CGMMV + H2O; C+B, CGMMV + boron.

## Sheet: Sheet2
Supplementary Table 5. GO analysis of DEGs in P+H vs C+H and C+H vs C+B.
GO analysis of up-regulated DEGs in P+H vs C+H.
#GO_classify1	GO_classify2	All gene	DE gene	Genes
#Total_gene		36400	1086
cellular component	extracellular region	838	45	Niben101Scf01001g00004;Niben101Scf02854g11002;Niben101Scf06482g02003;Niben101Scf00436g05003;Niben101Scf05804g02004;Niben101Scf28230g00019;Niben101Scf01453g06003;Niben101Scf09260g01010;Niben101Scf04869g03002;Niben101Scf01400g00014;Niben101Scf04386g04007;Niben101Scf00119g01002;Niben101Scf02853g06021;Niben101Scf00063g10001;Niben101Scf02023g02007;Niben101Scf03545g00016;Niben101Scf00640g04021;Niben101…
cellular component	cell	18827	529	Niben101Scf07048g02008;Niben101Scf09686g00013;Niben101Scf07236g00011;Niben101Scf02719g00006;Niben101Scf04813g00009;Niben101Scf03308g02011;Niben101Scf06916g01011;Niben101Scf10217g02001;Niben101Scf10360g00008;Niben101Scf08855g02013;Niben101Scf07482g00003;Niben101Scf00542g01003;Niben101Scf05610g03025;Niben101Scf01696g06050;Niben101Scf04447g01001;Niben101Scf02236g00001;Niben101Scf10126g00007;Niben101…
cellular component	nucleoid	52	0
cellular component	membrane	13595	364	Niben101Scf02207g05012;Niben101Scf01203g01008;Niben101Scf02919g00019;Niben101Scf07226g07007;Niben101Scf00207g02007;Niben101Scf09260g03002;Niben101Scf00876g02002;Niben101Scf02390g02016;Niben101Scf01549g00008;Niben101Scf01529g02004;Niben101Scf14028g02012;Niben101Scf03287g00018;Niben101Scf00421g01025;Niben101Scf15390g00011;Niben101Scf05710g03007;Niben101Scf06344g04010;Nicotiana_benthamiana_newGene_1…
cellular component	virion	56	1	Niben101Scf01782g05006
cellular component	cell junction	499	28	Niben101Scf03648g04010;Niben101Scf11424g02004;Niben101Scf05385g02008;Niben101Scf01799g00001;Niben101Scf02264g05016;Niben101Scf39295g00002;Niben101Scf00207g02007;Niben101Scf00640g04021;Niben101Scf03141g10006;Niben101Scf34287g00002;Niben101Scf04623g01006;Niben101Scf07404g04001;Niben101Scf01781g01002;Niben101Scf00542g01003;Niben101Scf01109g04005;Niben101Scf02395g02002;Niben101Scf05804g02004;Niben101…
cellular component	membrane-enclosed lumen	1215	43	Niben101Scf11424g02004;Niben101Scf09516g00022;Niben101Scf02632g03006;Niben101Ctg14678g00001;Niben101Scf00005g01008;Niben101Scf01696g06050;Niben101Scf02395g02002;Niben101Scf04852g01009;Niben101Scf10438g00008;Niben101Scf03732g01001;Niben101Scf03307g08018;Niben101Scf01343g00015;Niben101Scf05146g08004;Niben101Scf00369g07016;Niben101Scf04276g04020;Niben101Scf01609g00009;Niben101Scf04028g02018;Niben101…
cellular component	macromolecular complex	4834	109	Niben101Scf08030g00013;Niben101Scf05969g01002;Niben101Scf10475g00002;Niben101Scf07008g00005;Niben101Scf03953g02018;Niben101Scf15723g00003;Niben101Scf06996g02040;Niben101Scf01478g00014;Niben101Scf33716g00003;Niben101Scf03488g09019;Niben101Scf11706g00008;Niben101Scf11126g00004;Niben101Scf08308g04016;Niben101Scf00887g00009;Niben101Scf02217g03003;Niben101Scf00663g02007;Niben101Scf02699g00016;Niben101…
cellular component	organelle	13527	371	Niben101Scf10927g00019;Niben101Scf00952g03006;Niben101Scf03308g02011;Niben101Scf06916g01011;Niben101Scf12841g02008;Niben101Scf06990g00021;Niben101Scf10217g02001;Niben101Scf08855g02013;Niben101Scf07482g00003;Niben101Scf12318g00006;Niben101Scf01326g05008;Niben101Scf07048g02008;Niben101Scf16437g00002;Niben101Scf06286g01010;Niben101Scf02719g00006;Niben101Scf04218g00010;Niben101Scf09686g00013;Niben101…
cellular component	extracellular region part	122	10	Niben101Scf02853g06021;Niben101Scf01001g00004;Niben101Scf02023g02007;Niben101Ctg13736g00004;Niben101Scf02575g02010;Niben101Scf04869g03002;Niben101Scf01001g00003;Niben101Scf02422g01012;Niben101Scf01001g00005;Niben101Scf05035g01005
cellular component	organelle part	6053	139	Niben101Scf03944g02014;Niben101Scf13411g05020;Niben101Scf10217g02001;Niben101Scf06990g00021;Niben101Scf08426g00011;Niben101Scf06233g01009;Niben101Scf03335g01010;Niben101Scf01943g10013;Niben101Scf04028g02018;Niben101Scf01154g17005;Niben101Scf02015g01022;Niben101Scf09686g00013;Niben101Scf05231g02020;Niben101Scf16437g00002;Niben101Scf01326g05008;Niben101Scf13644g00002;Niben101Scf12318g00006;Niben101…
cellular component	virion part	56	1	Niben101Scf01782g05006
cellular component	membrane part	10950	285	Niben101Scf06743g00022;Niben101Scf03827g01009;Niben101Scf06172g04005;Niben101Scf00110g05012;Niben101Scf33716g00003;Niben101Scf01515g03004;Niben101Scf08199g02017;Niben101Scf01976g00014;Niben101Scf03624g04009;Niben101Scf01297g03001;Niben101Scf01494g04008;Niben101Scf03953g02018;Niben101Scf03325g01018;Niben101Scf08102g00002;Niben101Scf10927g00020;Niben101Scf11978g04001;Niben101Scf05269g03026;Niben101…
cellular component	cell part	18697	528	Niben101Scf04772g00008;Niben101Scf00994g07007;Niben101Scf39295g00002;Niben101Scf02575g02010;Nicotiana_benthamiana_newGene_13962;Niben101Ctg15114g00004;Niben101Scf04852g01009;Niben101Scf00530g06018;Niben101Scf03710g11002;Niben101Scf01020g02008;Niben101Scf03280g00016;Niben101Scf05804g02004;Niben101Scf02510g05023;Niben101Scf07825g02003;Niben101Scf04049g00024;Niben101Scf04339g00006;Niben101Scf02594g1…
cellular component	symplast	499	28	Niben101Scf01109g04005;Niben101Scf02395g02002;Niben101Scf02854g11002;Niben101Scf05804g02004;Niben101Scf08653g07017;Niben101Scf00165g01004;Niben101Scf04386g04007;Niben101Scf00119g01002;Niben101Scf03335g01010;Niben101Scf01716g00015;Niben101Scf09846g02023;Niben101Scf04711g00016;Niben101Scf11814g00005;Niben101Scf07451g01004;Niben101Scf00640g04021;Niben101Scf03141g10006;Niben101Scf34287g00002;Niben101…
cellular component	supramolecular complex	189	12	Niben101Scf06186g07020;Niben101Scf07645g00004;Niben101Scf02217g03003;Niben101Scf01235g00012;Niben101Scf01191g02010;Niben101Ctg16325g00005;Niben101Scf01073g07011;Niben101Scf16437g00002;Niben101Scf09127g01001;Niben101Scf01326g05008;Niben101Scf02836g03016;Niben101Scf06172g04003
molecular function	transcription factor activity, protein binding	171	5	Niben101Ctg15836g00002;Niben101Scf01696g06050;Niben101Scf02594g10016;Niben101Scf05063g04023;Niben101Scf03426g00005
molecular function	nucleic acid binding transcription factor activity	958	36	Niben101Scf02439g00023;Niben101Scf01500g01020;Niben101Scf02694g04001;Niben101Scf12516g02006;Niben101Scf10191g01007;Niben101Scf04350g03001;Niben101Scf08127g07002;Niben101Scf02279g08003;Niben101Scf03830g02001;Niben101Scf01774g10021;Niben101Scf00199g05004;Niben101Scf03614g00004;Niben101Scf12841g03023;Niben101Scf06603g03002;Niben101Scf01142g04009;Niben101Scf07162g03019;Niben101Scf08791g03011;Niben101…
molecular function	catalytic activity	16551	463	Niben101Scf00883g13016;Niben101Scf01764g03018;Niben101Scf09321g02026;Niben101Scf11774g01006;Niben101Scf01520g06007;Niben101Scf09403g00017;Niben101Scf04016g00009;Niben101Scf02509g05007;Niben101Scf13525g00022;Niben101Scf01236g00015;Niben101Ctg13781g00001;Niben101Scf00288g18013;Niben101Scf01434g03001;Niben101Scf01432g04001;Niben101Scf16114g01003;Niben101Scf01538g05003;Niben101Scf01192g00009;Niben101…
molecular function	signal transducer activity	329	8	Niben101Scf00941g02003;Niben101Scf01109g04005;Niben101Scf09260g03002;Niben101Scf13549g00004;Niben101Scf33716g00003;Niben101Scf08855g02013;Niben101Scf01018g02004;Niben101Scf00165g01004
molecular function	structural molecule activity	1399	17	Niben101Scf03953g02018;Niben101Scf07008g00005;Niben101Scf06172g04003;Niben101Scf01478g00014;Niben101Scf10431g00014;Niben101Scf01870g03004;Niben101Scf08030g00013;Niben101Scf03595g10007;Niben101Scf38997g00004;Niben101Scf03488g09019;Niben101Scf03293g01010;Niben101Scf16244g02026;Niben101Scf01326g05008;Niben101Scf02437g02020;Niben101Scf01436g00001;Niben101Ctg16216g00002;Niben101Scf06848g10001
molecular function	transporter activity	2513	73	Niben101Scf02828g00004;Niben101Scf05955g03041;Niben101Scf03915g03003;Niben101Scf03587g00002;Niben101Scf00936g02010;Niben101Scf09592g00014;Niben101Scf00367g03013;Nicotiana_benthamiana_newGene_3219;Niben101Scf04331g03004;Niben101Scf08653g07017;Niben101Scf01020g02008;Niben101Scf01951g01008;Niben101Scf04049g00024;Niben101Scf01395g03005;Niben101Scf08819g01014;Niben101Scf01510g00023;Niben101Scf04692g01…
molecular function	binding	17307	544	Niben101Ctg15110g00004;Niben101Scf00037g02016;Niben101Scf05549g02006;Niben101Scf01184g17001;Niben101Scf04765g02006;Niben101Scf03111g01017;Niben101Scf14523g00003;Niben101Scf01422g01015;Niben101Scf13199g00011;Niben101Scf03969g04003;Niben101Scf04819g02019;Niben101Scf08240g01016;Niben101Scf01694g11001;Niben101Scf04570g06004;Niben101Scf06382g03012;Niben101Scf21202g00005;Niben101Scf05609g02027;Niben101…
molecular function	electron carrier activity	485	9	Niben101Scf03937g00009;Niben101Scf07578g00004;Niben101Scf09149g01005;Niben101Scf02995g00003;Niben101Scf00426g01004;Niben101Scf02510g04002;Niben101Scf06999g01017;Niben101Scf03044g00005;Niben101Scf11684g03001
molecular function	antioxidant activity	304	11	Niben101Scf06602g00001;Niben101Ctg14566g00003;Niben101Scf06799g01001;Niben101Scf06912g01020;Niben101Scf11767g02018;Niben101Scf00436g05003;Niben101Scf11604g00006;Niben101Scf14996g00009;Niben101Scf01453g06003;Niben101Scf01721g07003;Niben101Scf00163g08018
molecular function	metallochaperone activity	8	2	Niben101Scf06912g01020;Niben101Scf11604g00006
molecular function	protein tag	9	0
molecular function	nutrient reservoir activity	72	0
molecular function	molecular transducer activity	163	4	Niben101Scf08855g02013;Niben101Scf09260g03002;Niben101Scf00941g02003;Niben101Scf10735g00018
molecular function	molecular function regulator	591	22	Niben101Scf05385g01015;Niben101Scf00618g05002;Niben101Scf07672g00014;Niben101Scf03164g07004;Niben101Scf06912g01020;Niben101Scf01478g00014;Niben101Scf09186g00006;Niben101Scf09817g02004;Niben101Scf04793g01005;Niben101Scf10384g02008;Niben101Scf03595g10007;Niben101Scf10735g00018;Niben101Scf02422g01012;Niben101Scf00448g18001;Niben101Scf04217g04003;Niben101Scf07672g00015;Niben101Scf02048g01009;Niben101…
biological process	reproduction	743	30	Niben101Scf02857g04002;Niben101Scf00679g07004;Niben101Scf00780g01029;Niben101Scf07451g01004;Niben101Scf04760g00010;Niben101Scf25069g01006;Niben101Scf06172g04005;Niben101Scf09458g00004;Niben101Scf02509g05007;Niben101Scf08653g07017;Niben101Scf06101g00013;Niben101Scf00663g02007;Niben101Scf08942g00013;Niben101Scf05231g02020;Niben101Scf01611g00004;Niben101Scf00152g20002;Niben101Scf07223g02009;Niben101…
biological process	cell killing	23	2	Niben101Scf04016g00009;Nicotiana_benthamiana_newGene_14017
biological process	immune system process	138	6	Niben101Ctg13736g00004;Niben101Scf01001g00005;Niben101Scf01001g00003;Niben101Scf04869g03002;Niben101Scf01001g00004;Niben101Scf04141g01002
biological process	metabolic process	17915	433	Niben101Scf01538g05003;Niben101Scf01192g00009;Niben101Scf01434g03001;Niben101Scf04016g00009;Niben101Scf13525g00022;Niben101Scf02509g05007;Niben101Scf01236g00015;Niben101Scf10438g00008;Niben101Scf09321g02026;Niben101Scf01764g03018;Niben101Scf03076g02004;Niben101Scf06602g00001;Niben101Scf01429g00010;Niben101Scf01623g01025;Niben101Scf10205g00021;Niben101Scf01278g09008;Niben101Scf00063g08002;Niben101…
biological process	cellular process	17318	455	Niben101Scf05692g04001;Niben101Scf04772g00008;Niben101Scf12404g00003;Niben101Scf02575g02010;Niben101Scf02828g00004;Niben101Scf10132g00017;Niben101Scf05880g03001;Niben101Scf00652g01007;Niben101Scf00503g07005;Niben101Scf02219g00002;Niben101Scf00220g05001;Niben101Scf00646g09009;Nicotiana_benthamiana_newGene_3219;Niben101Scf09458g00004;Niben101Scf03710g11002;Niben101Scf04918g10003;Niben101Scf01020g02…
biological process	reproductive process	736	30	Niben101Scf06172g04005;Niben101Scf25069g01006;Niben101Scf09458g00004;Niben101Scf02509g05007;Niben101Scf08653g07017;Niben101Scf06101g00013;Niben101Scf02857g04002;Niben101Scf00679g07004;Niben101Scf00780g01029;Niben101Scf07451g01004;Niben101Scf04760g00010;Niben101Scf08637g00009;Niben101Scf04350g03001;Niben101Scf00640g04021;Niben101Scf19266g01002;Niben101Scf01326g05006;Niben101Scf02522g01005;Niben101…
biological process	biological adhesion	7	0
biological process	signaling	1427	40	Niben101Scf10735g00018;Niben101Scf04104g05004;Niben101Scf13549g00004;Niben101Scf01109g04005;Niben101Scf05232g02012;Niben101Scf12841g03023;Niben101Scf00741g01012;Niben101Scf06734g02027;Niben101Scf00739g01009;Niben101Scf00941g02003;Niben101Scf07465g02002;Niben101Scf02222g02007;Niben101Scf03766g10010;Niben101Scf01677g02003;Niben101Ctg16222g00005;Niben101Scf10650g02001;Niben101Scf09260g03002;Niben101…
biological process	multicellular organismal process	1274	55	Niben101Scf00530g06018;Niben101Scf01255g00001;Niben101Scf09458g00004;Niben101Scf02509g05007;Niben101Scf01774g10021;Niben101Scf06101g00013;Niben101Scf00199g05004;Niben101Scf08653g07017;Niben101Scf02017g03004;Niben101Ctg13774g00001;Niben101Scf04181g00026;Niben101Scf02594g10016;Niben101Scf07451g01004;Niben101Scf03934g00015;Niben101Scf09260g03002;Niben101Scf04350g03001;Niben101Scf01326g05006;Niben101…
biological process	developmental process	1378	73	Niben101Scf02420g03014;Niben101Scf04760g00010;Niben101Scf02237g09006;Niben101Scf00446g02007;Niben101Scf07482g00003;Niben101Scf08855g02013;Niben101Scf03882g06002;Niben101Scf01437g03008;Niben101Scf08942g00013;Niben101Scf03147g02010;Niben101Scf07223g02009;Niben101Scf03422g04026;Niben101Scf03507g05006;Niben101Scf19266g01002;Niben101Scf04813g00009;Niben101Scf08791g03011;Niben101Scf02594g10016;Niben101…
biological process	growth	207	4	Niben101Scf01500g01020;Niben101Scf08721g01032;Niben101Scf05060g07004;Niben101Scf02857g04002
biological process	locomotion	18	1	Niben101Scf08942g00013
biological process	single-organism process	11890	357	Niben101Scf07482g00003;Niben101Scf08855g02013;Niben101Scf04078g01006;Niben101Scf04132g01002;Niben101Scf10217g02001;Niben101Scf12841g02008;Niben101Scf01188g10004;Niben101Scf07236g00011;Niben101Scf06819g06002;Niben101Scf09686g00013;Niben101Scf02001g01005;Niben101Scf08942g00013;Niben101Scf16437g00002;Niben101Scf07223g02009;Niben101Scf00593g04019;Niben101Scf00271g04029;Niben101Scf01255g00001;Nicotian…
biological process	rhythmic process	12	0
biological process	response to stimulus	4204	138	Niben101Scf04793g01005;Niben101Scf10384g02008;Niben101Scf08240g01016;Niben101Scf08653g07017;Niben101Scf06912g01020;Niben101Scf05232g02012;Niben101Scf07451g01004;Niben101Scf02594g10016;Niben101Scf10132g00017;Niben101Scf00739g01009;Niben101Scf05880g03001;Niben101Scf07672g00015;Niben101Scf05106g00003;Niben101Scf12609g01009;Niben101Scf08137g03002;Niben101Scf03882g06002;Niben101Scf07182g02004;Niben101…
biological process	localization	4503	121	Niben101Scf05269g03026;Niben101Scf05957g00001;Niben101Scf02699g00016;Niben101Scf13966g00013;Niben101Scf07023g00001;Niben101Scf02404g01007;Niben101Scf00436g04003;Niben101Scf05166g01022;Niben101Scf03765g00002;Niben101Scf06412g01004;Niben101Scf11978g04001;Niben101Scf11604g00006;Niben101Scf06318g00005;Niben101Scf03392g09004;Niben101Scf00713g04014;Niben101Scf08199g02017;Niben101Scf06720g01021;Niben101…
biological process	multi-organism process	490	11	Niben101Scf09260g03002;Niben101Scf08855g02013;Niben101Scf00640g04021;Nicotiana_benthamiana_newGene_14017;Niben101Scf06101g00013;Niben101Scf04016g00009;Niben101Scf08942g00013;Niben101Scf14523g00003;Niben101Scf04760g00010;Niben101Scf00780g01029;Niben101Scf12045g06025
biological process	biological regulation	5991	218	Niben101Scf02108g01025;Niben101Scf03169g04009;Niben101Scf04104g05004;Niben101Scf01109g04005;Niben101Scf07672g00014;Niben101Scf11447g02007;Niben101Scf09116g01013;Niben101Ctg16222g00005;Niben101Scf09242g02014;Niben101Scf01677g02003;Niben101Scf01326g05006;Niben101Scf10191g01007;Niben101Scf09260g03002;Niben101Scf07250g02001;Nicotiana_benthamiana_newGene_8301;Niben101Scf06397g02002;Niben101Scf02572g02…
biological process	cellular component organization or biogenesis	3503	123	Niben101Scf06280g05017;Niben101Scf03545g00016;Niben101Scf09516g00022;Niben101Scf00063g10001;Niben101Scf07404g04001;Niben101Scf04772g00008;Niben101Scf00597g08017;Niben101Scf00005g01008;Niben101Scf00542g01003;Niben101Scf05387g02004;Niben101Scf00220g05001;Niben101Scf04447g01001;Niben101Scf01020g02008;Niben101Scf02705g02021;Niben101Scf03307g08018;Niben101Scf02175g05002;Niben101Scf09458g00004;Niben101…
biological process	detoxification	348	12	Niben101Scf14996g00009;Niben101Scf00436g05003;Niben101Scf11604g00006;Niben101Scf00163g08018;Niben101Scf01721g07003;Niben101Scf01453g06003;Niben101Scf06912g01020;Niben101Ctg14566g00003;Niben101Scf06602g00001;Niben101Scf06799g01001;Niben101Scf10205g00021;Niben101Scf11767g02018
GO analysis of down-regulated DEGs in P+H vs C+H.
#GO_classify1	GO_classify2	All gene	DE gene	Genes
#Total_gene		36400	1348
cellular component	extracellular region	838	35	Niben101Scf07323g00006;Niben101Scf09260g01011;Niben101Scf00984g04002;Niben101Scf00487g06021;Niben101Scf03628g14021;Niben101Scf02763g05012;Niben101Scf03565g00008;Niben101Scf00069g12017;Niben101Scf07825g06017;Niben101Scf01143g11007;Niben101Scf04643g04001;Niben101Scf09075g03002;Niben101Scf11214g00007;Niben101Scf03460g04004;Niben101Scf11490g00015;Niben101Scf05552g00008;Niben101Scf07073g02007;Niben101…
cellular component	cell	18827	786	Niben101Scf02622g12036;Niben101Scf18643g00022;Niben101Scf04329g02003;Niben101Scf05617g00005;Niben101Scf06109g00001;Niben101Scf04561g00005;Niben101Scf10974g01004;Niben101Scf02685g00006;Niben101Scf02517g16001;Niben101Scf01513g00010;Niben101Scf05442g03015;Niben101Scf02838g07002;Niben101Scf09345g00003;Niben101Scf01719g08010;Niben101Scf04494g00018;Niben101Scf01859g09005;Niben101Scf03068g00024;Niben101…
cellular component	nucleoid	52	6	Niben101Scf11670g01002;Niben101Scf07825g06017;Niben101Scf08041g01021;Niben101Scf02026g02002;Niben101Scf05278g01015;Niben101Scf00487g06021
cellular component	membrane	13595	632	Niben101Scf03562g03006;Niben101Scf02469g00012;Niben101Scf02507g03001;Niben101Scf00063g10008;Niben101Scf00367g02013;Niben101Scf02832g04001;Niben101Scf09760g01005;Nicotiana_benthamiana_newGene_6976;Niben101Scf01905g00009;Niben101Scf03377g01010;Niben101Scf03599g01001;Niben101Scf01105g00001;Niben101Scf17749g00008;Nicotiana_benthamiana_newGene_18521;Niben101Scf02027g00001;Niben101Scf10032g01004;Niben1…
cellular component	virion	56	2	Niben101Scf10450g00012;Niben101Scf03573g00017
cellular component	cell junction	499	8	Niben101Scf13776g02016;Niben101Scf03380g03005;Nicotiana_benthamiana_newGene_18521;Niben101Scf03565g00008;Niben101Scf04817g00017;Niben101Scf03422g01002;Niben101Scf03396g07029;Niben101Scf00571g10002
cellular component	membrane-enclosed lumen	1215	12	Niben101Scf01110g06005;Niben101Scf03577g00018;Niben101Scf00409g00002;Niben101Scf00780g02003;Niben101Scf04529g00011;Niben101Scf04083g01003;Niben101Scf06042g03021;Niben101Scf02569g02011;Niben101Scf01827g02007;Niben101Scf11767g01009;Niben101Scf01827g02008;Niben101Scf06525g01001
cellular component	macromolecular complex	4834	173	Niben101Scf03595g00003;Niben101Scf08975g01010;Niben101Scf11767g01011;Niben101Scf03169g05002;Niben101Scf05621g09002;Niben101Scf02513g08003;Niben101Scf02147g01007;Niben101Scf05621g13007;Niben101Scf00220g04015;Niben101Scf00858g01009;Niben101Scf03961g00003;Niben101Scf05824g13008;Niben101Scf04083g01003;Niben101Scf00167g04017;Niben101Scf03877g00007;Niben101Scf38373g00003;Niben101Scf04328g00044;Niben101…
cellular component	organelle	13527	575	Niben101Scf01413g01001;Niben101Scf38373g00003;Niben101Scf03961g00003;Niben101Scf05060g02003;Niben101Scf02510g05021;Niben101Scf03015g06014;Niben101Scf00858g01009;Niben101Scf02147g01007;Niben101Scf06919g00029;Niben101Scf16613g04003;Niben101Scf00837g00017;Niben101Scf06190g06004;Niben101Scf01450g00005;Niben101Scf00780g02003;Niben101Scf03576g01039;Niben101Scf05688g08010;Niben101Scf00444g01008;Niben101…
cellular component	extracellular region part	122	2	Niben101Scf02763g05012;Niben101Scf01143g11007
cellular component	organelle part	6053	320	Niben101Scf02090g06011;Niben101Scf05368g03015;Niben101Scf06357g02001;Niben101Scf11383g00027;Niben101Scf01799g02002;Niben101Scf08643g00008;Niben101Scf03274g01011;Niben101Scf05943g00002;Niben101Scf15391g02001;Niben101Scf00487g06021;Niben101Scf11670g01002;Niben101Scf05216g09026;Niben101Scf07825g06017;Niben101Scf02128g00025;Niben101Scf14650g00005;Niben101Scf01535g01008;Niben101Scf03263g02005;Niben101…
cellular component	virion part	56	2	Niben101Scf03573g00017;Niben101Scf10450g00012
cellular component	membrane part	10950	507	Niben101Scf14591g01007;Niben101Scf02838g07002;Niben101Scf01719g08010;Niben101Scf14778g00021;Niben101Scf01537g01001;Niben101Scf05750g03012;Niben101Scf07678g07012;Niben101Scf02819g02008;Niben101Scf04695g00006;Niben101Scf00298g02018;Niben101Scf01323g05008;Niben101Scf04494g00018;Niben101Scf05516g00011;Niben101Scf01964g03005;Niben101Scf00167g05001;Niben101Scf04529g00012;Niben101Scf04742g03019;Niben101…
cellular component	cell part	18697	774	Niben101Scf01164g00011;Niben101Scf00885g14015;Niben101Scf02569g02011;Niben101Scf04019g02005;Niben101Scf04643g04001;Niben101Scf05047g04011;Niben101Scf00594g00001;Niben101Scf15372g00003;Niben101Scf00897g03002;Niben101Scf00472g05017;Niben101Scf05950g00001;Niben101Scf08488g02002;Niben101Scf01323g02005;Niben101Scf03455g01006;Niben101Scf06153g00010;Niben101Scf04796g00025;Niben101Scf00688g02001;Niben101…
cellular component	symplast	499	8	Niben101Scf04817g00017;Niben101Scf03565g00008;Nicotiana_benthamiana_newGene_18521;Niben101Scf03380g03005;Niben101Scf13776g02016;Niben101Scf00571g10002;Niben101Scf03422g01002;Niben101Scf03396g07029
cellular component	supramolecular complex	189	0
molecular function	transcription factor activity, protein binding	171	10	Niben101Scf00471g00013;Niben101Scf00215g05003;Niben101Scf08149g01007;Niben101Scf02511g05005;Niben101Scf03253g01020;Niben101Scf01940g00011;Niben101Scf02854g03003;Niben101Scf05483g01007;Niben101Scf03154g00005;Niben101Scf16613g04003
molecular function	nucleic acid binding transcription factor activity	958	34	Niben101Scf10974g01004;Niben101Scf08149g01007;Niben101Scf08995g00012;Niben101Scf06913g00001;Niben101Scf07761g02006;Niben101Scf02430g03006;Niben101Scf02702g00005;Niben101Scf01692g01003;Niben101Scf07693g00011;Niben101Scf00715g09001;Niben101Scf01297g04006;Niben101Scf28100g00004;Niben101Scf02511g05005;Niben101Scf13695g01014;Niben101Scf00471g00013;Niben101Scf18347g00023;Niben101Scf06560g01004;Niben101…
molecular function	catalytic activity	16551	701	Niben101Scf14003g00001;Niben101Scf02562g04001;Niben101Scf02562g01010;Niben101Scf04329g02003;Niben101Scf02622g12036;Niben101Scf02685g00006;Niben101Scf01337g06006;Niben101Scf06109g00001;Niben101Scf04327g02021;Niben101Scf05617g00005;Niben101Scf01719g08010;Niben101Scf02819g02008;Niben101Scf09345g00003;Niben101Scf05442g03015;Niben101Scf03068g00024;Niben101Scf05536g01013;Niben101Scf03576g01039;Niben101…
molecular function	signal transducer activity	329	7	Niben101Scf00747g12035;Niben101Scf05434g00017;Niben101Scf02217g06006;Niben101Scf05200g00003;Niben101Scf17398g00008;Niben101Scf02280g02004;Niben101Scf02171g00008
molecular function	structural molecule activity	1399	28	Niben101Scf00571g10002;Niben101Scf11178g02002;Niben101Scf06840g00009;Niben101Scf00167g04017;Niben101Scf04529g00011;Niben101Scf17834g00014;Niben101Scf05060g02003;Niben101Scf03396g07029;Niben101Scf06171g00001;Niben101Scf01384g00008;Niben101Scf00858g01009;Niben101Scf15437g02016;Niben101Scf12404g00002;Niben101Scf01164g00011;Niben101Scf02622g12036;Niben101Scf02511g03013;Niben101Scf00193g03008;Niben101…
molecular function	transporter activity	2513	121	Niben101Scf11790g01008;Niben101Scf04529g00005;Niben101Scf00219g07014;Niben101Ctg09679g00001;Niben101Scf05112g00010;Niben101Scf01046g04004;Niben101Scf01005g04004;Niben101Scf02618g03012;Niben101Scf01365g05003;Niben101Scf23506g00001;Niben101Scf05619g00015;Niben101Scf00571g10002;Niben101Scf05220g00005;Niben101Scf03396g07029;Niben101Scf01046g03010;Niben101Scf10015g07012;Niben101Scf00542g04001;Niben101…
molecular function	binding	17307	590	Niben101Scf03377g01010;Niben101Scf01905g00009;Niben101Scf02105g01013;Niben101Scf04875g06014;Niben101Scf17749g00008;Niben101Scf07554g01010;Niben101Scf01105g00001;Niben101Scf02027g00001;Niben101Scf10032g01004;Niben101Scf03953g06002;Niben101Scf13474g00001;Niben101Scf05928g00005;Niben101Scf03733g05002;Niben101Scf01374g00008;Niben101Scf06902g02019;Niben101Scf02507g03001;Niben101Scf00063g10008;Niben101…
molecular function	electron carrier activity	485	37	Niben101Scf11178g01005;Niben101Scf04329g02003;Niben101Scf07170g02006;Niben101Scf19315g00010;Niben101Scf04989g03001;Niben101Scf00823g00002;Niben101Scf02104g00001;Niben101Scf00578g00008;Niben101Scf06876g01028;Niben101Scf00568g04071;Niben101Scf19423g00008;Niben101Scf02838g07002;Niben101Scf03929g04002;Niben101Scf02583g06003;Niben101Scf08723g02015;Niben101Scf00526g01006;Niben101Scf04763g02009;Niben101…
molecular function	antioxidant activity	304	21	Niben101Scf08020g01012;Niben101Scf08690g02001;Niben101Scf02526g00002;Niben101Scf03460g04004;Niben101Scf13916g00008;Niben101Scf05682g00011;Niben101Scf01759g04008;Niben101Ctg10591g00003;Niben101Scf01799g02002;Niben101Scf00709g02007;Niben101Scf01372g00003;Niben101Scf01497g03008;Nicotiana_benthamiana_newGene_18342;Niben101Scf04174g01008;Niben101Scf02041g04015;Niben101Scf02537g02023;Niben101Scf08670g0…
molecular function	metallochaperone activity	8	1	Niben101Scf02511g03013
molecular function	protein tag	9	0
molecular function	nutrient reservoir activity	72	2	Niben101Scf00493g00020;Niben101Scf02749g04008
molecular function	molecular transducer activity	163	2	Niben101Scf01897g07006;Niben101Scf14320g00010
molecular function	molecular function regulator	591	11	Niben101Scf01897g07006;Niben101Scf01917g08001;Niben101Scf03733g01009;Niben101Scf09997g00024;Niben101Scf14955g00009;Niben101Scf05709g01018;Niben101Scf14320g00010;Niben101Scf02658g01008;Niben101Scf10309g01006;Niben101Scf03287g02004;Niben101Scf11490g00015
biological process	reproduction	743	18	Niben101Scf01692g01003;Niben101Scf06042g03021;Niben101Scf11490g00015;Niben101Scf05730g00011;Niben101Scf03756g02016;Niben101Scf04817g00017;Niben101Scf07778g03025;Niben101Scf04072g01001;Niben101Scf05787g00005;Nicotiana_benthamiana_newGene_18521;Niben101Scf13776g02016;Niben101Scf11126g02001;Niben101Scf05193g00003;Niben101Scf20176g00007;Niben101Scf03565g00008;Niben101Scf08702g02005;Niben101Scf01259g0…
biological process	cell killing	23	0
biological process	immune system process	138	4	Niben101Scf01189g00001;Niben101Scf02763g05012;Niben101Scf00248g02011;Niben101Scf09264g00009
biological process	metabolic process	17915	827	Niben101Scf15187g03007;Niben101Scf07030g08003;Niben101Scf10162g00004;Niben101Scf00960g03015;Niben101Scf05977g01005;Niben101Scf02330g00012;Niben101Scf04422g17008;Niben101Scf01052g06012;Niben101Scf02445g10019;Niben101Scf01493g00007;Niben101Scf01980g10004;Niben101Scf01820g00025;Niben101Scf07034g08030;Niben101Scf00789g00009;Niben101Scf03733g03018;Niben101Scf09217g01009;Niben101Scf09470g01004;Niben101…
biological process	cellular process	17318	710	Niben101Scf03848g05008;Niben101Scf15752g00007;Niben101Scf02840g01013;Niben101Scf03481g00014;Niben101Scf00463g00016;Niben101Scf00526g01006;Niben101Scf01189g00001;Niben101Scf11232g01012;Niben101Scf06081g04017;Niben101Scf08706g02020;Niben101Scf05782g00010;Niben101Scf01116g01004;Niben101Scf00327g00011;Niben101Scf34590g00006;Niben101Scf02203g05002;Niben101Scf00104g02012;Niben101Scf03287g02002;Niben101…
biological process	reproductive process	736	18	Niben101Scf01692g01003;Niben101Scf06042g03021;Niben101Scf05787g00005;Nicotiana_benthamiana_newGene_18521;Niben101Scf13776g02016;Niben101Scf04072g01001;Niben101Scf04817g00017;Niben101Scf07778g03025;Niben101Scf11490g00015;Niben101Scf05730g00011;Niben101Scf03756g02016;Niben101Scf20176g00007;Niben101Scf11126g02001;Niben101Scf05193g00003;Niben101Scf01555g02004;Niben101Scf01259g09006;Niben101Scf08702g0…
biological process	biological adhesion	7	0
biological process	signaling	1427	43	Niben101Scf09906g01003;Niben101Scf09264g00009;Niben101Scf02445g10019;Niben101Scf04941g03017;Niben101Scf00747g12035;Niben101Scf04882g00001;Niben101Scf06565g03013;Niben101Scf04174g01008;Niben101Scf01897g07006;Niben101Scf03809g02013;Niben101Scf04225g02002;Niben101Scf11235g01007;Niben101Scf04332g02005;Niben101Scf09296g01009;Niben101Scf00682g05009;Niben101Scf02217g06006;Niben101Scf14320g00010;Niben101…
biological process	multicellular organismal process	1274	32	Niben101Scf02408g01007;Niben101Scf20176g00007;Niben101Scf11126g02001;Niben101Scf01555g02004;Niben101Scf07284g02002;Niben101Scf18639g00026;Niben101Scf03628g14021;Niben101Scf03565g00008;Nicotiana_benthamiana_newGene_18521;Niben101Scf13776g02016;Niben101Scf04072g01001;Niben101Scf03953g06002;Niben101Scf02348g00008;Niben101Scf04817g00017;Niben101Scf07778g03025;Niben101Scf05730g00011;Niben101Scf11490g0…
biological process	developmental process	1378	25	Niben101Scf01035g04005;Niben101Scf00807g03030;Niben101Scf13393g00004;Niben101Scf11126g02001;Niben101Scf20176g00007;Niben101Scf02408g01007;Niben101Scf07284g02002;Niben101Scf01259g09006;Niben101Scf04418g04003;Niben101Scf03628g14021;Niben101Scf08702g02005;Niben101Scf03565g00008;Niben101Scf18639g00026;Niben101Scf01873g01004;Niben101Scf02702g00005;Niben101Scf06042g03021;Niben101Scf01692g01003;Niben101…
biological process	growth	207	2	Niben101Scf01259g09006;Niben101Scf05618g03008
biological process	locomotion	18	0
biological process	single-organism process	11890	582	Niben101Scf14591g01007;Niben101Scf10919g01012;Niben101Scf00807g03030;Niben101Scf01048g00005;Niben101Scf04695g00006;Niben101Scf05750g03012;Niben101Scf04418g04003;Niben101Scf00355g03001;Niben101Scf04225g02002;Niben101Scf00480g00002;Niben101Scf01323g05008;Niben101Scf04742g03019;Niben101Scf00167g05001;Niben101Scf09296g01009;Niben101Scf01899g06004;Niben101Scf03853g03012;Niben101Scf08523g00022;Niben101…
biological process	rhythmic process	12	0
biological process	response to stimulus	4204	200	Niben101Scf09217g01001;Niben101Scf01276g00005;Niben101Scf03809g02013;Niben101Scf08702g02005;Niben101Scf00125g01016;Niben101Scf01759g04008;Niben101Scf14320g00010;Niben101Scf02026g02002;Niben101Scf00057g00032;Niben101Scf00248g02011;Niben101Scf03147g09006;Niben101Scf08873g01026;Niben101Scf01594g00001;Niben101Scf02537g02023;Niben101Scf05799g02010;Niben101Scf00585g05010;Niben101Scf00245g03004;Niben101…
biological process	localization	4503	152	Niben101Scf11480g02007;Niben101Scf03773g00002;Niben101Scf02572g02024;Niben101Scf02511g03013;Niben101Scf04407g02027;Niben101Scf00167g04011;Niben101Scf01249g06014;Niben101Scf04079g02002;Niben101Scf00901g06008;Niben101Scf00819g08010;Niben101Scf03380g03005;Niben101Scf09392g00004;Niben101Scf00119g02012;Niben101Scf00629g01001;Niben101Scf00488g01002;Niben101Scf01259g10022;Niben101Scf02736g01011;Niben101…
biological process	multi-organism process	490	16	Niben101Scf04072g01001;Niben101Scf03990g00010;Niben101Scf09264g00009;Niben101Scf05787g00005;Niben101Scf13776g02016;Niben101Scf05730g00011;Niben101Scf04817g00017;Niben101Scf06042g03021;Niben101Scf01259g09006;Niben101Scf00367g02013;Niben101Scf01555g02004;Niben101Scf03565g00008;Niben101Scf07242g07006;Niben101Scf04205g04013;Niben101Scf00248g02011;Niben101Scf05193g00003
biological process	biological regulation	5991	206	Niben101Scf14320g00010;Niben101Scf00341g02007;Niben101Scf02516g01004;Niben101Scf11124g01027;Niben101Scf00057g00032;Niben101Scf03147g09006;Niben101Scf08702g02005;Niben101Scf01873g01004;Niben101Scf03809g02013;Niben101Scf03628g01009;Niben101Scf00504g02001;Niben101Scf07693g00011;Niben101Scf01692g01003;Niben101Scf02702g00005;Niben101Scf14333g00004;Niben101Scf09325g05001;Niben101Scf02658g01008;Niben101…
biological process	cellular component organization or biogenesis	3503	71	Niben101Scf09260g01011;Niben101Scf00984g04002;Niben101Scf00487g06021;Niben101Scf01338g03019;Niben101Scf07323g00006;Niben101Scf04011g08004;Niben101Scf04643g04001;Niben101Scf07825g06017;Niben101Scf00367g02013;Niben101Scf02569g02011;Niben101Scf11689g03003;Niben101Scf05483g01007;Niben101Scf09075g03002;Niben101Scf14650g00005;Niben101Scf00570g03009;Niben101Scf00215g05003;Niben101Scf06357g02001;Niben101…
biological process	detoxification	348	26	Niben101Scf13916g00008;Niben101Scf03147g09006;Niben101Scf02526g00002;Niben101Scf03460g04004;Niben101Scf00897g03002;Niben101Scf08690g02001;Niben101Scf03263g03004;Niben101Scf08020g01012;Niben101Scf03147g10015;Niben101Scf01759g04008;Niben101Scf05682g00011;Niben101Scf02041g04015;Nicotiana_benthamiana_newGene_18342;Niben101Scf04174g01008;Niben101Scf10316g03003;Niben101Scf00709g02007;Niben101Scf01372g0…
note: P+H, PBS solution + H2O; P+B, PBS solution + boron; C+H, CGMMV + H2O; C+B, CGMMV + boron.

## Sheet: Sheet3
Supplementary Table 5. GO analysis of DEGs in P+H vs C+H and C+H vs C+B.
GO analysis of up-regulated DEGs in C+H vs C+B.
#GO_classify1	GO_classify2	All gene	DE gene	Genes
#Total_gene		36400	478
cellular component	extracellular region	838	14	Niben101Scf10336g01001;Niben101Scf03913g01045;Niben101Ctg12033g00001;Niben101Scf08415g00010;Niben101Ctg11091g00003;Niben101Scf03990g00010;Niben101Scf07244g01004;Niben101Scf02413g03022;Niben101Scf03460g04004;Niben101Scf01143g11007;Niben101Scf02763g05012;Niben101Scf15972g02029;Niben101Scf07244g00001;Niben101Ctg13782g00003
cellular component	cell	18827	195	Niben101Scf14662g01006;Niben101Scf05233g00012;Niben101Scf08624g00006;Nicotiana_benthamiana_newGene_11886;Niben101Scf13779g00003;Niben101Scf01326g07007;Niben101Scf04989g03001;Niben101Scf04072g01001;Niben101Scf11325g00011;Niben101Scf00525g04008;Niben101Scf04099g08003;Niben101Scf08546g03002;Niben101Scf03263g03004;Niben101Scf05137g01028;Niben101Scf14299g00002;Niben101Scf03012g03021;Niben101Scf15187g0…
cellular component	nucleoid	52	0
cellular component	membrane	13595	179	Niben101Scf03202g08006;Niben101Ctg14049g00002;Niben101Scf06499g00001;Niben101Scf06109g00001;Niben101Scf00543g03005;Niben101Scf01184g09001;Niben101Scf07242g07006;Niben101Scf03143g05002;Niben101Scf09392g00004;Niben101Scf00163g04004;Niben101Scf03747g04036;Niben101Scf02838g07002;Niben101Scf04817g00017;Niben101Scf05368g06016;Niben101Scf01189g04025;Niben101Scf04024g01004;Niben101Scf05298g00004;Niben101…
cellular component	virion	56	0
cellular component	cell junction	499	6	Niben101Scf03913g01045;Niben101Scf01899g02003;Niben101Scf08020g06001;Niben101Scf02411g00007;Niben101Scf08415g00010;Niben101Scf04817g00017
cellular component	membrane-enclosed lumen	1215	0
cellular component	macromolecular complex	4834	11	Niben101Scf05060g02003;Niben101Scf02303g00022;Niben101Scf08034g01002;Niben101Scf08175g00008;Niben101Scf02093g00004;Niben101Scf15972g02029;Niben101Scf10855g08005;Niben101Scf01750g15003;Niben101Scf01143g11007;Niben101Ctg14049g00002;Niben101Scf05694g00009
cellular component	organelle	13527	119	Niben101Scf01750g15003;Niben101Scf00788g02014;Niben101Scf02763g05012;Niben101Scf00799g00011;Niben101Scf01143g11007;Niben101Scf00149g03002;Niben101Scf04217g07002;Niben101Scf07554g01010;Niben101Scf01212g03005;Niben101Scf09225g04002;Niben101Scf18955g00004;Niben101Scf05056g00004;Niben101Scf07395g00031;Niben101Scf02482g01016;Niben101Scf00163g22002;Niben101Scf01899g02003;Niben101Scf02510g05021;Niben101…
cellular component	extracellular region part	122	4	Niben101Scf15972g02029;Niben101Scf10336g01001;Niben101Scf02763g05012;Niben101Scf01143g11007
cellular component	organelle part	6053	19	Niben101Scf01954g01001;Niben101Scf05060g02003;Niben101Scf01294g05002;Niben101Scf04072g01001;Niben101Scf04024g01004;Niben101Scf08415g00010;Niben101Ctg13927g00002;Niben101Scf02749g01001;Niben101Scf04422g00011;Niben101Scf05193g00003;Niben101Scf07436g00006;Niben101Scf14299g00002;Niben101Scf08175g00008;Niben101Scf06109g00001;Niben101Scf07127g00003;Niben101Ctg14049g00002;Niben101Scf01899g02003;Niben101…
cellular component	virion part	56	0
cellular component	membrane part	10950	143	Niben101Scf07242g01001;Niben101Scf00542g04001;Niben101Scf07060g03009;Niben101Scf00124g00014;Niben101Scf03326g01009;Niben101Scf02736g01003;Niben101Scf00745g02015;Niben101Scf04010g01005;Niben101Scf12469g00011;Niben101Scf10336g01001;Niben101Scf02050g00011;Niben101Scf07395g00031;Niben101Scf00168g07003;Niben101Scf10032g01004;Niben101Scf03253g01003;Niben101Scf01249g06014;Niben101Scf02613g03001;Niben101…
cellular component	cell part	18697	189	Niben101Scf07761g02006;Niben101Scf06109g00001;Niben101Scf00543g03005;Niben101Scf08478g02009;Niben101Scf00807g03030;Niben101Ctg14049g00002;Niben101Scf02838g07002;Niben101Scf04875g02008;Niben101Scf03570g02009;Niben101Scf04817g00017;Niben101Scf04024g01004;Niben101Scf03240g00008;Niben101Scf05678g01001;Niben101Scf03028g01011;Niben101Scf05948g04005;Niben101Scf05298g00004;Niben101Scf03435g01016;Niben101…
cellular component	symplast	499	6	Niben101Scf02411g00007;Niben101Scf08415g00010;Niben101Scf04817g00017;Niben101Scf03913g01045;Niben101Scf01899g02003;Niben101Scf08020g06001
cellular component	supramolecular complex	189	0
molecular function	transcription factor activity, protein binding	171	2	Niben101Scf01777g02001;Niben101Scf14662g01006
molecular function	nucleic acid binding transcription factor activity	958	51	Niben101Scf08546g03002;Niben101Scf03240g00008;Niben101Scf06200g00001;Niben101Scf23241g00003;Niben101Scf00163g22002;Niben101Scf06467g01006;Niben101Scf02145g09012;Niben101Scf07063g00001;Niben101Scf03245g04004;Niben101Scf07761g02006;Niben101Scf03398g06007;Niben101Scf00788g03016;Niben101Scf00454g04003;Niben101Scf05056g00004;Niben101Scf14662g01006;Niben101Scf01212g03005;Niben101Scf01297g04006;Niben101…
molecular function	catalytic activity	16551	220	Niben101Scf03012g03021;Niben101Scf05137g01028;Niben101Scf03263g03004;Niben101Scf07391g03014;Niben101Scf11131g00003;Niben101Scf09345g00003;Niben101Scf00779g06009;Niben101Scf00802g00005;Niben101Scf08308g04015;Niben101Scf01642g03011;Niben101Scf06180g00015;Niben101Scf05340g00012;Niben101Scf05301g04003;Niben101Scf02511g06008;Niben101Scf06376g05031;Niben101Scf03021g03028;Niben101Scf08624g00006;Niben101…
molecular function	signal transducer activity	329	12	Niben101Scf08020g06001;Niben101Scf08624g00006;Niben101Scf00747g12035;Niben101Scf02171g00008;Niben101Scf05434g00017;Niben101Scf02217g06006;Niben101Scf11417g00013;Niben101Scf01249g04006;Niben101Scf06499g00001;Niben101Scf00747g12032;Niben101Scf09928g01023;Niben101Scf04003g01002
molecular function	structural molecule activity	1399	5	Niben101Scf00503g06003;Niben101Scf05060g02003;Niben101Scf07127g00003;Niben101Scf10053g00011;Niben101Scf14299g00002
molecular function	transporter activity	2513	34	Niben101Scf05189g00002;Niben101Scf01141g04003;Niben101Scf14144g01017;Niben101Scf11325g00011;Niben101Scf02041g04015;Nicotiana_benthamiana_newGene_11886;Niben101Scf07395g00031;Niben101Scf00219g07014;Niben101Scf06499g00001;Niben101Scf08175g00008;Niben101Scf00542g04001;Niben101Scf07060g03009;Niben101Scf09392g00004;Niben101Scf02736g01003;Niben101Scf01870g03002;Niben101Scf09401g01007;Niben101Scf01323g0…
molecular function	binding	17307	254	Niben101Scf00788g03015;Niben101Scf17398g00012;Niben101Scf09282g00004;Niben101Scf00482g07009;Niben101Scf00428g09005;Niben101Scf01998g07001;Niben101Scf05862g00004;Niben101Scf05522g00002;Niben101Scf05694g00009;Niben101Scf07841g01012;Niben101Scf05862g00006;Niben101Scf00735g06023;Niben101Scf05811g08010;Niben101Scf00872g03005;Niben101Scf08546g05004;Niben101Scf03570g04001;Niben101Scf06556g10007;Niben101…
molecular function	electron carrier activity	485	7	Niben101Scf01642g03011;Niben101Scf01326g07007;Niben101Scf04989g03001;Niben101Scf06172g04009;Niben101Scf05233g00012;Niben101Scf02838g07002;Niben101Scf00823g00002
molecular function	antioxidant activity	304	6	Niben101Scf03460g04004;Niben101Ctg10591g00003;Niben101Scf02041g04015;Niben101Scf04174g01008;Niben101Ctg12033g00001;Niben101Scf03990g00010
molecular function	metallochaperone activity	8	0
molecular function	protein tag	9	0
molecular function	nutrient reservoir activity	72	0
molecular function	molecular transducer activity	163	2	Niben101Scf06499g00001;Niben101Scf00747g12032
molecular function	molecular function regulator	591	0
biological process	reproduction	743	11	Niben101Scf08702g02005;Niben101Scf03913g01045;Niben101Scf05137g01028;Niben101Scf02050g00011;Niben101Scf04817g00017;Niben101Scf05193g00003;Niben101Scf02411g00007;Niben101Scf08415g00010;Niben101Scf04448g02011;Niben101Scf05787g00005;Niben101Scf04072g01001
biological process	cell killing	23	0
biological process	immune system process	138	4	Niben101Scf02763g05012;Niben101Scf09604g01004;Niben101Scf02411g00007;Niben101Scf05948g04002
biological process	metabolic process	17915	231	Niben101Scf05637g00007;Niben101Scf07576g02009;Niben101Scf04082g02014;Niben101Scf12672g00005;Niben101Scf01141g01001;Niben101Scf06280g01016;Niben101Scf03292g04003;Niben101Scf01660g00007;Niben101Scf07019g01004;Niben101Scf00109g02027;Niben101Scf01154g18011;Niben101Scf07244g00001;Niben101Scf10434g00020;Niben101Scf11417g00013;Niben101Scf05749g02030;Niben101Scf15752g00002;Niben101Scf11480g02007;Niben101…
biological process	cellular process	17318	213	Niben101Scf02918g00003;Niben101Scf00542g04001;Niben101Scf03326g01009;Niben101Scf19533g00007;Niben101Scf00163g22002;Niben101Scf06684g01008;Niben101Scf04010g01005;Niben101Scf00745g02015;Niben101Scf08724g00012;Niben101Scf00370g03002;Niben101Scf10316g03003;Niben101Scf05011g00001;Niben101Scf04401g06001;Niben101Scf02460g01004;Niben101Scf08510g01006;Niben101Ctg12033g00001;Niben101Scf05880g02003;Niben101…
biological process	reproductive process	736	11	Niben101Scf04448g02011;Niben101Scf04072g01001;Niben101Scf05787g00005;Niben101Scf02050g00011;Niben101Scf04817g00017;Niben101Scf02411g00007;Niben101Scf05193g00003;Niben101Scf08415g00010;Niben101Scf03913g01045;Niben101Scf08702g02005;Niben101Scf05137g01028
biological process	biological adhesion	7	0
biological process	signaling	1427	35	Niben101Scf10316g03004;Niben101Scf02482g01016;Niben101Scf00454g04003;Niben101Scf08624g00006;Niben101Scf00745g02015;Niben101Scf06499g00001;Niben101Scf00163g22002;Niben101Scf02217g06006;Niben101Scf09345g00003;Niben101Scf05278g05007;Niben101Scf01249g04006;Niben101Scf08546g03002;Niben101Scf03240g00008;Niben101Scf04234g01007;Niben101Scf03147g10010;Niben101Scf08196g01001;Niben101Scf00800g02008;Niben101…
biological process	multicellular organismal process	1274	12	Niben101Scf05787g00005;Niben101Scf04072g01001;Niben101Scf04448g02011;Niben101Scf01873g01004;Niben101Scf00807g03030;Niben101Scf02411g00007;Niben101Scf05193g00003;Niben101Scf08415g00010;Niben101Scf04817g00017;Niben101Scf02050g00011;Niben101Scf08702g02005;Niben101Scf05137g01028
biological process	developmental process	1378	4	Niben101Scf08415g00010;Niben101Scf08702g02005;Niben101Scf01873g01004;Niben101Scf00807g03030
biological process	growth	207	2	Niben101Scf24679g00011;Niben101Scf02945g01001
biological process	locomotion	18	0
biological process	single-organism process	11890	168	Niben101Scf02303g00022;Niben101Scf02945g01001;Niben101Scf08873g01022;Niben101Scf00897g03002;Niben101Scf02093g00004;Niben101Scf00800g02008;Niben101Scf03147g09006;Niben101Scf04739g00001;Niben101Scf02511g05004;Niben101Scf00270g15011;Niben101Scf09282g00004;Niben101Scf08020g06001;Niben101Scf06344g05003;Niben101Scf04174g01008;Niben101Scf03570g04001;Niben101Scf08546g05004;Niben101Scf05694g00009;Niben101…
biological process	rhythmic process	12	0
biological process	response to stimulus	4204	86	Niben101Scf08546g05004;Niben101Scf05437g04015;Niben101Scf03570g04001;Niben101Scf17398g00012;Niben101Scf04174g01008;Niben101Scf02217g05010;Niben101Scf08020g06001;Niben101Scf08415g00010;Niben101Scf03114g03011;Niben101Scf05948g04002;Niben101Ctg13927g00002;Niben101Scf00428g09005;Niben101Scf03460g04004;Niben101Scf09604g01004;Niben101Scf03147g09006;Niben101Scf00800g02008;Niben101Scf08196g01001;Niben101…
biological process	localization	4503	57	Niben101Scf06684g05005;Niben101Scf02511g05004;Niben101Scf00747g12032;Niben101Scf01323g02005;Niben101Scf05112g00010;Niben101Scf02303g00022;Niben101Scf02543g04011;Niben101Scf00262g01003;Niben101Scf07395g00028;Niben101Scf02093g00004;Niben101Scf05437g04015;Niben101Scf15972g02029;Niben101Scf07127g00003;Niben101Scf01478g05006;Niben101Scf00497g02005;Niben101Scf05694g00009;Niben101Scf07841g01012;Niben101…
biological process	multi-organism process	490	15	Niben101Scf05787g00005;Niben101Scf04072g01001;Niben101Scf04448g02011;Niben101Scf05193g00003;Niben101Scf02411g00007;Niben101Scf07242g07006;Niben101Scf08415g00010;Niben101Scf05948g04002;Niben101Scf04205g04013;Niben101Scf02050g00011;Niben101Scf03990g00010;Niben101Scf04817g00017;Niben101Scf05137g01028;Niben101Scf03913g01045;Niben101Scf01378g00004
biological process	biological regulation	5991	119	Niben101Scf09928g01023;Niben101Scf04003g01002;Niben101Scf15437g02006;Niben101Scf16007g00010;Niben101Scf00163g22004;Niben101Scf02171g00008;Niben101Scf05434g00017;Niben101Scf00747g12035;Niben101Scf02362g02014;Niben101Scf04109g06004;Niben101Scf11417g00013;Niben101Scf15752g00002;Niben101Scf01777g02001;Niben101Scf08034g01002;Niben101Scf19266g00006;Niben101Scf15437g02005;Niben101Scf07036g03003;Niben101…
biological process	cellular component organization or biogenesis	3503	21	Niben101Scf03326g01009;Niben101Scf07244g01004;Niben101Scf07436g00006;Niben101Scf11689g03003;Niben101Ctg13782g00003;Niben101Scf00370g03002;Niben101Scf04988g02019;Niben101Scf07841g01012;Niben101Scf00807g03030;Niben101Scf24679g00011;Niben101Scf05694g00009;Niben101Scf03638g02002;Niben101Scf02413g03022;Niben101Scf03990g00010;Niben101Scf07474g00018;Niben101Ctg11091g00003;Niben101Scf05060g02003;Niben101…
biological process	detoxification	348	13	Niben101Scf03147g10015;Niben101Scf03990g00010;Niben101Scf04174g01008;Niben101Scf00897g03002;Niben101Scf02041g04015;Niben101Scf03263g03004;Niben101Ctg12033g00001;Niben101Scf02325g03024;Niben101Scf10316g03003;Niben101Scf08196g01001;Niben101Scf03147g09006;Niben101Ctg10591g00003;Niben101Scf03460g04004
GO analysis of up-regulated DEGs in C+H vs C+B.
#GO_classify1	GO_classify2	All gene	DE gene	Genes
#Total_gene		36400	363
cellular component	extracellular region	838	23	Niben101Scf23606g00005;Niben101Scf08338g00001;Niben101Scf03545g00016;Niben101Scf01781g01002;Niben101Scf03128g07024;Niben101Scf05649g01008;Niben101Scf02886g02004;Niben101Scf39295g00002;Niben101Scf15065g00001;Niben101Scf06602g00001;Niben101Scf00751g00001;Niben101Scf01799g00001;Niben101Scf28230g00019;Niben101Scf00369g05011;Niben101Scf00536g04007;Niben101Scf00640g04021;Niben101Scf06275g03011;Niben101…
cellular component	cell	18827	191	Niben101Scf08415g01034;Niben101Scf00679g07004;Niben101Scf06042g01001;Niben101Scf16244g02026;Niben101Scf01154g17005;Niben101Scf06734g02027;Niben101Scf12320g03008;Niben101Scf04654g04001;Niben101Scf02767g04005;Niben101Scf13411g05020;Niben101Scf02375g06001;Niben101Scf11447g02007;Niben101Scf28230g00019;Niben101Scf04181g00031;Niben101Scf00960g11004;Niben101Scf03819g02008;Niben101Scf04386g02001;Niben101…
cellular component	nucleoid	52	0
cellular component	membrane	13595	124	Niben101Scf00953g07005;Niben101Scf00152g20002;Niben101Scf01093g04004;Niben101Scf06318g00005;Niben101Scf04740g00005;Niben101Scf01380g01021;Niben101Scf00090g08011;Niben101Scf14458g00009;Niben101Scf00751g00001;Niben101Scf00165g01004;Niben101Scf01750g15002;Niben101Scf00616g02014;Niben101Scf00408g00002;Niben101Scf01716g00015;Niben101Scf14028g02012;Niben101Scf01956g10006;Niben101Scf06999g01006;Niben101…
cellular component	virion	56	0
cellular component	cell junction	499	17	Niben101Scf04181g00031;Niben101Scf15536g03005;Niben101Scf01716g00015;Niben101Scf02792g02012;Niben101Scf00165g01004;Niben101Scf01799g00001;Niben101Scf05385g02008;Niben101Scf00640g04021;Niben101Scf03335g01010;Niben101Scf04711g00016;Niben101Scf09846g02023;Niben101Scf11424g02004;Niben101Scf03141g10006;Niben101Scf01781g01002;Niben101Scf34287g00002;Niben101Scf02767g04005;Niben101Scf39295g00002
cellular component	membrane-enclosed lumen	1215	6	Niben101Scf13622g00006;Niben101Scf02217g03003;Niben101Scf01073g04022;Niben101Scf11424g02004;Niben101Scf02182g03001;Niben101Scf04003g04002
cellular component	macromolecular complex	4834	41	Niben101Scf10431g00014;Niben101Scf01478g00014;Niben101Scf06249g05020;Niben101Scf09116g01013;Niben101Scf08465g02007;Niben101Scf07672g00014;Niben101Scf00428g08008;Niben101Scf16244g02026;Niben101Scf02854g09017;Niben101Scf02156g15009;Niben101Scf07162g03019;Niben101Scf02217g03003;Niben101Scf10732g01014;Niben101Scf03577g01001;Niben101Scf13622g00006;Niben101Scf02767g04005;Niben101Scf04003g04002;Niben101…
cellular component	organelle	13527	122	Niben101Scf07325g00030;Niben101Scf01372g05004;Niben101Scf03419g03008;Niben101Scf08704g01003;Niben101Ctg15110g00004;Niben101Scf04740g00007;Niben101Scf00367g03013;Niben101Scf02836g03016;Niben101Scf05307g00001;Niben101Scf06186g07020;Niben101Scf02621g04025;Niben101Scf10122g01005;Niben101Scf02525g05017;Niben101Scf06275g03010;Niben101Scf03335g01010;Niben101Scf00883g13016;Niben101Scf06275g03011;Niben101…
cellular component	extracellular region part	122	0
cellular component	organelle part	6053	48	Niben101Scf06238g01004;Niben101Scf11936g01017;Niben101Ctg16325g00005;Niben101Scf03934g00015;Niben101Scf03969g01008;Niben101Scf01950g03015;Niben101Scf10144g01001;Niben101Scf07645g00004;Niben101Scf00436g00003;Niben101Scf09475g01017;Niben101Scf06525g00027;Niben101Scf00776g04004;Niben101Scf10157g01024;Niben101Scf11424g02004;Niben101Scf02299g02013;Niben101Scf08156g01001;Niben101Scf05583g00006;Niben101…
cellular component	virion part	56	0
cellular component	membrane part	10950	93	Niben101Scf03273g03022;Niben101Scf09445g04020;Niben101Scf03167g02025;Niben101Scf01956g10006;Niben101Scf03276g00010;Niben101Scf07023g00001;Niben101Scf06999g01006;Niben101Scf00410g01018;Niben101Scf01982g02003;Niben101Scf03169g04009;Niben101Scf15564g00001;Niben101Scf05692g04001;Niben101Scf01037g08005;Niben101Scf04740g00005;Niben101Scf06318g00005;Niben101Scf14458g00009;Niben101Scf01380g01021;Niben101…
cellular component	cell part	18697	190	Niben101Scf04654g04001;Niben101Scf06734g02027;Niben101Scf12320g03008;Niben101Scf01154g17005;Niben101Scf02767g04005;Niben101Scf11447g02007;Niben101Scf13411g05020;Niben101Scf02375g06001;Niben101Scf08415g01034;Niben101Scf06042g01001;Niben101Scf00679g07004;Niben101Scf16244g02026;Niben101Scf07788g04022;Niben101Scf00474g11008;Niben101Scf04386g02001;Niben101Scf02823g04001;Niben101Scf08465g02007;Niben101…
cellular component	symplast	499	17	Niben101Scf11424g02004;Niben101Scf01781g01002;Niben101Scf03141g10006;Niben101Scf34287g00002;Niben101Scf02767g04005;Niben101Scf39295g00002;Niben101Scf15536g03005;Niben101Scf01716g00015;Niben101Scf04181g00031;Niben101Scf02792g02012;Niben101Scf01799g00001;Niben101Scf00165g01004;Niben101Scf05385g02008;Niben101Scf03335g01010;Niben101Scf00640g04021;Niben101Scf04711g00016;Niben101Scf09846g02023
cellular component	supramolecular complex	189	9	Niben101Ctg16325g00005;Niben101Scf02217g03003;Niben101Scf03329g01002;Niben101Scf10157g01024;Niben101Scf02836g03016;Niben101Scf07645g00004;Niben101Scf03647g03024;Niben101Scf00428g08008;Niben101Scf06186g07020
molecular function	transcription factor activity, protein binding	171	1	Niben101Scf03426g00005
molecular function	nucleic acid binding transcription factor activity	958	15	Niben101Scf15451g00001;Niben101Scf02694g04001;Niben101Scf07223g02009;Niben101Scf00627g00003;Niben101Scf04654g04001;Niben101Scf00474g11008;Niben101Scf01500g01020;Niben101Scf04628g00001;Niben101Scf00199g05004;Niben101Scf12516g02006;Niben101Scf03419g03008;Niben101Scf06603g03002;Niben101Scf08127g07002;Niben101Scf04995g04005;Niben101Scf07162g03019
molecular function	catalytic activity	16551	161	Niben101Scf28230g00019;Niben101Scf06249g05020;Niben101Scf09846g02023;Niben101Scf09116g01013;Niben101Scf06412g03016;Niben101Scf00984g09008;Niben101Scf13622g01020;Niben101Scf04386g02001;Niben101Scf13146g00005;Niben101Scf01192g00009;Niben101Scf03817g14005;Niben101Scf11447g02007;Niben101Scf09010g04002;Niben101Scf05516g04022;Niben101Scf05649g01008;Niben101Scf12320g03008;Niben101Scf06734g02027;Niben101…
molecular function	signal transducer activity	329	1	Niben101Scf00165g01004
molecular function	structural molecule activity	1399	7	Niben101Scf03329g01002;Niben101Scf01478g00014;Niben101Scf10431g00014;Niben101Scf16244g02026;Niben101Scf10732g01014;Niben101Scf03647g03024;Niben101Scf05583g00006
molecular function	transporter activity	2513	21	Niben101Scf00369g15012;Niben101Scf00367g03013;Niben101Scf01716g00015;Niben101Scf11978g04001;Niben101Scf02662g00003;Niben101Scf00960g11004;Niben101Scf14028g02012;Niben101Scf06799g04001;Niben101Scf03352g01001;Niben101Scf06318g00005;Niben101Scf06172g04005;Niben101Scf00713g04014;Niben101Scf14458g00009;Niben101Scf02525g05017;Niben101Scf02658g05007;Niben101Scf01203g01008;Niben101Scf00936g02010;Niben101…
molecular function	binding	17307	186	Niben101Scf02792g02012;Niben101Scf05553g04002;Niben101Scf01478g00014;Niben101Scf00408g00002;Niben101Scf10431g00014;Niben101Scf00751g00001;Niben101Scf01438g05003;Niben101Scf04368g00007;Niben101Scf03373g04012;Niben101Scf12852g02006;Niben101Scf03191g01013;Niben101Scf02805g06002;Niben101Scf09353g06003;Niben101Scf02854g09017;Niben101Scf05610g00002;Niben101Scf03169g04009;Niben101Scf07672g00014;Niben101…
molecular function	electron carrier activity	485	6	Niben101Scf01830g01024;Niben101Scf03446g12003;Niben101Scf03937g00009;Niben101Scf07578g00004;Niben101Scf09445g04020;Niben101Scf02124g01022
molecular function	antioxidant activity	304	7	Niben101Scf00751g00001;Niben101Scf08338g00001;Niben101Scf06602g00001;Niben101Scf05649g01008;Niben101Scf01721g07003;Niben101Scf14996g00009;Niben101Scf11767g02018
molecular function	metallochaperone activity	8	0
molecular function	protein tag	9	0
molecular function	nutrient reservoir activity	72	0
molecular function	molecular transducer activity	163	1	Niben101Scf10735g00018
molecular function	molecular function regulator	591	6	Niben101Scf03203g02001;Niben101Scf09186g00006;Niben101Scf07672g00014;Niben101Scf06639g01008;Niben101Scf10735g00018;Niben101Scf01478g00014
biological process	reproduction	743	9	Niben101Scf00679g07004;Niben101Scf00436g00003;Niben101Scf02832g01021;Niben101Scf07223g02009;Niben101Scf00640g04021;Niben101Scf00152g20002;Niben101Scf06101g00013;Niben101Scf06172g04005;Niben101Scf01380g01021
biological process	cell killing	23	4	Niben101Scf06275g03011;Nicotiana_benthamiana_newGene_14017;Niben101Scf04016g00009;Niben101Scf06275g03010
biological process	immune system process	138	0
biological process	metabolic process	17915	142	Niben101Scf06529g06013;Niben101Scf08926g01013;Niben101Scf00402g01007;Niben101Scf01380g01021;Niben101Scf03417g03001;Niben101Scf11685g00011;Niben101Scf02156g15009;Niben101Scf11814g00004;Niben101Scf05692g04001;Niben101Scf15564g00001;Niben101Scf06819g06002;Niben101Scf01721g07003;Niben101Scf21401g00003;Niben101Ctg15717g00003;Niben101Scf03142g04006;Niben101Scf34287g00002;Niben101Scf03276g00010;Niben101…
biological process	cellular process	17318	155	Niben101Scf12414g04010;Niben101Scf00652g01007;Niben101Scf08338g00001;Niben101Scf00428g08008;Niben101Scf09321g02026;Niben101Scf00824g00002;Niben101Scf03577g01001;Niben101Scf07482g00003;Niben101Scf13622g00006;Niben101Scf06799g04001;Niben101Scf02789g01004;Niben101Scf00369g05011;Niben101Scf03329g01002;Niben101Scf08355g03014;Niben101Scf03129g02008;Niben101Scf14726g00007;Niben101Scf01941g01008;Niben101…
biological process	reproductive process	736	9	Niben101Scf00152g20002;Niben101Scf06101g00013;Niben101Scf02832g01021;Niben101Scf07223g02009;Niben101Scf00640g04021;Niben101Scf01380g01021;Niben101Scf06172g04005;Niben101Scf00679g07004;Niben101Scf00436g00003
biological process	biological adhesion	7	0
biological process	signaling	1427	9	Niben101Scf02222g02007;Niben101Scf00741g01012;Niben101Scf00152g20002;Niben101Scf06734g02027;Niben101Scf10735g00018;Niben101Scf04386g02001;Niben101Scf24330g00014;Niben101Scf00402g01007;Niben101Scf00165g01004
biological process	multicellular organismal process	1274	21	Niben101Scf03934g00015;Niben101Scf02832g01021;Niben101Scf07482g00003;Niben101Scf00530g06018;Niben101Scf12516g02006;Niben101Scf00679g07004;Niben101Scf00428g08008;Niben101Scf06172g04005;Niben101Scf01500g01020;Niben101Scf02017g03004;Niben101Scf01380g01021;Niben101Scf02823g04001;Niben101Scf07223g02009;Niben101Scf09116g01013;Niben101Scf03191g01013;Niben101Scf00152g20002;Niben101Scf06101g00013;Niben101…
biological process	developmental process	1378	26	Niben101Scf03934g00015;Niben101Scf02375g06001;Niben101Scf02832g01021;Niben101Scf11447g02007;Niben101Scf07482g00003;Niben101Scf00530g06018;Niben101Scf00428g08008;Niben101Scf00679g07004;Niben101Scf12516g02006;Niben101Scf06042g01001;Niben101Scf02017g03004;Niben101Scf01380g01021;Niben101Scf02823g04001;Niben101Scf06172g04005;Niben101Scf01500g01020;Niben101Scf00152g20002;Niben101Scf05060g07004;Niben101…
biological process	growth	207	2	Niben101Scf01500g01020;Niben101Scf05060g07004
biological process	locomotion	18	0
biological process	single-organism process	11890	119	Niben101Scf03335g01010;Niben101Scf01987g01006;Niben101Scf08156g01001;Niben101Scf05060g07004;Niben101Scf06101g00013;Niben101Scf00713g04014;Niben101Scf06172g04005;Niben101Scf05385g02008;Niben101Scf00369g15012;Niben101Scf06602g00001;Niben101Scf05307g00001;Niben101Scf00369g21009;Niben101Scf06186g07020;Niben101Scf00417g00008;Niben101Scf15536g03005;Niben101Scf07236g00011;Niben101Scf03419g03008;Niben101…
biological process	rhythmic process	12	0
biological process	response to stimulus	4204	50	Niben101Scf08338g00001;Niben101Scf07672g00014;Niben101Scf04016g00009;Niben101Scf07160g00025;Niben101Scf06267g01005;Niben101Scf01721g07003;Niben101Scf04003g04002;Niben101Scf06734g02027;Niben101Scf10735g00018;Niben101Scf05516g04022;Niben101Scf05649g01008;Niben101Scf01429g00010;Niben101Scf02792g02012;Niben101Scf00165g01004;Niben101Scf00751g00001;Niben101Scf01380g01021;Niben101Scf03426g00005;Niben101…
biological process	localization	4503	40	Niben101Scf01203g01008;Niben101Scf06068g01005;Niben101Scf11447g02007;Niben101Scf01395g03005;Niben101Scf07023g00001;Niben101Scf02514g01005;Niben101Scf02767g04005;Niben101Scf03129g02008;Niben101Scf01716g00015;Niben101Scf14028g02012;Niben101Scf06799g04001;Niben101Scf05336g00011;Niben101Scf00414g10003;Niben101Scf00960g11004;Niben101Scf06318g00005;Niben101Scf01380g01021;Niben101Scf14458g00009;Niben101…
biological process	multi-organism process	490	7	Niben101Scf01380g01021;Niben101Scf06275g03010;Niben101Scf00640g04021;Nicotiana_benthamiana_newGene_14017;Niben101Scf06275g03011;Niben101Scf06101g00013;Niben101Scf04016g00009
biological process	biological regulation	5991	67	Niben101Scf11108g00011;Niben101Scf01830g01024;Niben101Scf00308g01002;Niben101Scf11126g00004;Niben101Scf03710g11002;Niben101Scf00199g05004;Niben101Scf01272g01010;Niben101Scf02299g02013;Niben101Scf04290g01001;Niben101Scf02222g02007;Niben101Scf03934g00015;Niben101Scf00741g01012;Niben101Scf08127g07002;Niben101Scf06799g04001;Niben101Scf03819g02008;Niben101Scf00046g02008;Niben101Scf03129g02008;Niben101…
biological process	cellular component organization or biogenesis	3503	55	Niben101Scf06639g01008;Niben101Scf00974g01017;Niben101Scf02182g03001;Niben101Scf00536g04007;Niben101Scf05717g02005;Niben101Scf15972g01020;Niben101Scf11126g00004;Niben101Scf06602g00001;Niben101Scf03647g03024;Niben101Scf09523g01007;Niben101Scf06172g04005;Niben101Scf10122g01005;Niben101Scf00176g09013;Niben101Scf00974g02010;Niben101Scf03335g01010;Niben101Scf01685g12005;Niben101Scf05060g07004;Niben101…
biological process	detoxification	348	7	Niben101Scf11767g02018;Niben101Scf14996g00009;Niben101Scf01721g07003;Niben101Scf05649g01008;Niben101Scf06602g00001;Niben101Scf00751g00001;Niben101Scf08338g00001
note: P+H, PBS solution + H2O; P+B, PBS solution + boron; C+H, CGMMV + H2O; C+B, CGMMV + boron.
