# Supplementary material for: Reactive oxygen species-related genes participate in resistance to cucumber green mottle mosaic virus infection regulated by boron in Nicotiana benthamiana and watermelon
Source: Front Plant Sci. 2022 Nov 11;13:1027404. doi: 10.3389/fpls.2022.1027404 (PMC9691971; doi:10.3389/fpls.2022.1027404)
Supplement: Supplementary file 7 [file Table_6.xlsx]

## Sheet: Sheet1
Supplementary Table 6. KEGG pathway analysis of DEGs in P+H vs C+H and C+H vs C+B.
KEGG pathway analysis of DEGs in P+H vs C+H.
#Pathway	ko_ID	DEG	Gene	DEG_all	Gene_all	Genes
Pentose phosphate pathway	ko00030	27	124	764	12184	Niben101Scf00063g06042;Niben101Scf00466g00012;Niben101Scf00578g03001;Niben101Scf01025g01013;Niben101Scf01037g01013;Niben101Scf01150g04004;Niben101Scf01153g00016;Niben101Scf01406g03019;Niben101Scf01433g08029;Niben101Scf01521g01007;Niben101Scf01534g00018;Niben101Scf02792g01031;Niben101Scf02864g04008;Niben101Scf02902g02003;Niben101Scf03307g06009;Niben101Scf04096g00010;Niben101Scf04656g00006;Niben101…	K01783+K01623+K00851+K01623+K00895+K03841+K00850+K03841+K01623+K01057+K01807+K01807+K01623+K03841+K00850+K00615+K00615+K01623+K00895+K03841+K00895+K01623+K01835+K01623+K03841+K00948+K01623
Valine, leucine and isoleucine degradation	ko00280	6	121	764	12184	Niben101Scf00288g18013;Niben101Scf00302g03028;Niben101Scf01641g01011;Niben101Scf02719g00006;Niben101Scf04011g00009;Niben101Scf04843g00008	K00827+K00827+K00166+K00827+K00827+K00826
Cutin, suberine and wax biosynthesis	ko00073	4	61	764	12184	Niben101Scf01505g02004;Niben101Scf01681g16010;Niben101Scf02831g08009;Niben101Scf04930g00006	K15403+K15404+K15403+K20769
Non-homologous end-joining	ko03450	1	25	764	12184	Niben101Scf09516g00022	K10885
Valine, leucine and isoleucine biosynthesis	ko00290	1	55	764	12184	Niben101Scf04843g00008	K00826
Biosynthesis of amino acids	ko01230	49	566	764	12184	Niben101Ctg11026g00001;Niben101Scf00063g06042;Niben101Scf00069g12017;Niben101Scf00409g00002;Niben101Scf00417g00008;Niben101Scf00466g00012;Niben101Scf00824g00002;Niben101Scf00870g03002;Niben101Scf00952g03003;Niben101Scf01025g01013;Niben101Scf01048g00005;Niben101Scf01153g00016;Niben101Scf01433g08029;Niben101Scf01450g00005;Niben101Scf01534g00018;Niben101Scf01664g02022;Niben101Scf01765g02012;Niben101…	K15634+K01783+K00600+K01736+K00873+K01623+K01915+K00814+K01915+K01623+K00600+K00850+K01623+K01626+K01807+K01735+K01915+K00789+K01915+K00927+K01696+K01807+K01623+K14272+K14454+K00850+K01620+K00615+K00615+K01623+K01850+K00600+K00826+K01623+K00927+K00611+K00600+K13034+K00815+K01803+K01623+K14454+K00891+K15227+K15227+K14272+K00948+K00134+K01623
Pantothenate and CoA biosynthesis	ko00770	1	59	764	12184	Niben101Scf04843g00008	K00826
Base excision repair	ko03410	10	98	764	12184	Niben101Scf00887g00009;Niben101Scf01388g00004;Niben101Scf01513g00017;Niben101Scf02230g03027;Niben101Scf02510g05023;Niben101Scf07672g00014;Niben101Scf07672g00015;Niben101Scf08137g03002;Niben101Scf10384g02008;Niben101Scf12410g00018	K02325+K10798+K03575+K02327+K02326+K04802+K04802+K02325+K04802+K10798
Thiamine metabolism	ko00730	3	24	764	12184	Niben101Scf02399g01011;Niben101Scf03842g05002;Nicotiana_benthamiana_newGene_17432	K01662+K03147+K00949
Nucleotide excision repair	ko03420	15	175	764	12184	Niben101Scf00887g00009;Niben101Scf00911g01004;Niben101Scf01150g03001;Niben101Scf01429g00010;Niben101Scf01438g04009;Niben101Scf02230g03027;Niben101Scf02510g05023;Niben101Scf03710g11002;Niben101Scf06042g03021;Niben101Scf07325g00030;Niben101Scf07672g00014;Niben101Scf07672g00015;Niben101Scf08137g03002;Niben101Scf10384g02008;Niben101Scf12928g01009	K02325+K10739+K10842+K10739+K10739+K02327+K02326+K10756+K07466+K07466+K04802+K04802+K02325+K04802+K07466
Ubiquinone and other terpenoid-quinone biosynthesis	ko00130	9	96	764	12184	Niben101Scf00262g05006;Niben101Scf00484g03011;Niben101Scf01063g05023;Niben101Scf03437g00008;Niben101Scf03573g00017;Niben101Scf04323g02023;Niben101Scf07714g00008;Niben101Scf08196g01007;Niben101Scf10450g00012	K00487+K12501+K01904+K01904+K12502+K14760+K00815+K00487+K12502
Sulfur metabolism	ko00920	10	74	764	12184	Niben101Scf00327g00011;Niben101Scf00487g06021;Niben101Scf05438g03003;Niben101Scf05438g03004;Niben101Scf06205g02014;Niben101Scf07327g03021;Niben101Scf07825g06017;Niben101Scf12197g03017;Niben101Scf16508g00001;Niben101Scf37733g00002	K05907+K00392+K05907+K05907+K13811+K13034+K00392+K05907+K13811+K05907
Fructose and mannose metabolism	ko00051	23	154	764	12184	Niben101Ctg12072g00001;Niben101Scf00466g00012;Niben101Scf01025g01013;Niben101Scf01037g01013;Niben101Scf01150g04004;Niben101Scf01153g00016;Niben101Scf01258g02001;Niben101Scf01406g03019;Niben101Scf01433g08029;Niben101Scf02688g04013;Niben101Scf02864g04008;Niben101Scf02902g02003;Niben101Scf03307g06009;Niben101Scf04664g01003;Niben101Scf05047g04009;Niben101Scf05048g00010;Niben101Scf05226g08016;Niben101…	K00847+K01623+K01623+K00895+K03841+K00850+K00847+K03841+K01623+K00008+K01623+K03841+K00850+K01623+K00895+K03841+K00895+K01623+K01103+K01803+K01623+K03841+K01623
alpha-Linolenic acid metabolism	ko00592	5	88	764	12184	Niben101Scf00779g06009;Niben101Scf02688g02014;Niben101Scf02749g01001;Niben101Scf05407g00001;Niben101Scf05799g02010	K05894+K00454+K00454+K00454+K01723
Linoleic acid metabolism	ko00591	6	37	764	12184	Niben101Scf01375g09001;Niben101Scf01434g03001;Niben101Scf02688g02014;Niben101Scf02749g01001;Niben101Scf05407g00001;Niben101Scf08869g00002	K15718+K15718+K00454+K00454+K00454+K15718
Zeatin biosynthesis	ko00908	7	85	764	12184	Niben101Scf00022g04003;Niben101Scf00361g02004;Niben101Scf00492g01003;Niben101Scf01612g03002;Niben101Scf01777g03010;Niben101Scf03050g06003;Niben101Scf07089g02001	K00279+K00279+K13495+K00279+K13495+K00279+K13495
Glutathione metabolism	ko00480	16	180	764	12184	Niben101Scf00897g03002;Niben101Scf02086g01010;Niben101Scf02367g05038;Niben101Scf02526g00002;Niben101Scf02537g02023;Niben101Scf03147g09006;Niben101Scf03147g10015;Niben101Scf03263g03004;Niben101Scf04174g01004;Niben101Scf04174g01008;Niben101Scf05952g00002;Niben101Scf09470g01004;Niben101Scf10205g00021;Niben101Scf10316g03003;Niben101Scf11767g02018;Niben101Scf17339g00003	K00799+K00799+K00434+K00432+K00434+K00799+K00799+K00799+K00799+K00799+K00799+K00799+K00799+K00799+K00799+K00432
Glyoxylate and dicarboxylate metabolism	ko00630	54	210	764	12184	Niben101Ctg10591g00003;Niben101Ctg10718g00002;Niben101Scf00069g12017;Niben101Scf00622g00006;Niben101Scf00797g18009;Niben101Scf00824g00002;Niben101Scf00897g02011;Niben101Scf00952g03003;Niben101Scf01048g00005;Niben101Scf01125g01006;Niben101Scf01497g03008;Niben101Scf01513g01010;Niben101Scf01517g05010;Niben101Scf01526g04020;Niben101Scf01718g01001;Niben101Scf01765g02012;Niben101Scf01991g04009;Niben101…	K03781+K01602+K00600+K11517+K00830+K01915+K11517+K01915+K00600+K02437+K03781+K18121+K11517+K02437+K15893+K01915+K01602+K01602+K01602+K01602+K01602+K00026+K03781+K00605+K01915+K01602+K00281+K15918+K14272+K01602+K01602+K02437+K15919+K15919+K01433+K00026+K11517+K01602+K01602+K01602+K00284+K00600+K00605+K02437+K15893+K00600+K00830+K11517+K19269+K14272+K19269+K00284+K03781+K15918
Photosynthesis	ko00195	90	405	764	12184	Niben101Scf00104g02012;Niben101Scf00167g04011;Niben101Scf00167g04017;Niben101Scf00176g05004;Niben101Scf00220g04015;Niben101Scf00271g04024;Niben101Scf00337g07012;Niben101Scf00508g00002;Niben101Scf00508g00007;Niben101Scf00526g01006;Niben101Scf00568g04011;Niben101Scf00568g04071;Niben101Scf00578g00008;Niben101Scf00597g06001;Niben101Scf00851g01001;Niben101Scf00879g05002;Niben101Scf00960g03015;Niben101…	K02721+K02111+K02108+K08901+K02695+K02694+K02717+K02638+K02638+K02703+K02705+K02690+K08901+K02693+K14332+K08902+K02113+K03541+K02695+K02704+K02693+K02695+K02115+K02692+K02692+K02109+K14332+K02698+K02716+K03541+K02703+K02692+K02692+K02694+K02717+K08905+K02703+K02721+K02721+K02639+K02717+K02641+K02716+K08901+K02693+K02695+K08903+K08905+K08905+K02636+K02694+K02690+K02695+K02111+K02712+K02109+K02694+…
Terpenoid backbone biosynthesis	ko00900	12	124	764	12184	Niben101Scf00063g13014;Niben101Scf02203g05002;Niben101Scf02387g03005;Niben101Scf02399g01011;Niben101Scf02668g01010;Niben101Scf04741g05017;Niben101Scf04945g00007;Niben101Scf06249g03002;Niben101Scf09264g00009;Niben101Scf09686g00013;Niben101Scf13530g01008;Nicotiana_benthamiana_newGene_16736	K10960+K00021+K13789+K01662+K10960+K05356+K05356+K10960+K03526+K00021+K15889+K01597
Fatty acid degradation	ko00071	5	76	764	12184	Niben101Scf01100g04008;Niben101Scf04078g01006;Niben101Scf05197g01015;Niben101Scf05385g03007;Niben101Scf11319g00005	K01897+K00001+K01897+K00121+K00121
Nitrogen metabolism	ko00910	14	84	764	12184	Niben101Scf00824g00002;Niben101Scf00952g03003;Niben101Scf01735g00005;Niben101Scf01765g02012;Niben101Scf02330g00012;Niben101Scf02408g02009;Niben101Scf03302g02007;Niben101Scf04198g01001;Niben101Scf06349g00008;Niben101Scf07103g03016;Niben101Scf09253g00011;Niben101Scf12966g00016;Niben101Scf14591g01007;Niben101Scf34590g00006	K01915+K01915+K10534+K01915+K01915+K00366+K01674+K00284+K01673+K00366+K01673+K00284+K01674+K10534
Nicotinate and nicotinamide metabolism	ko00760	2	50	764	12184	Niben101Scf05955g03003;Niben101Scf07187g01002	K18551+K00278
Porphyrin and chlorophyll metabolism	ko00860	13	100	764	12184	Niben101Scf00063g13014;Niben101Scf02668g01010;Niben101Scf03068g00024;Niben101Scf04388g00011;Niben101Scf06120g00013;Niben101Scf06249g03002;Niben101Scf07214g00015;Niben101Scf10063g00003;Niben101Scf10434g00020;Niben101Scf12135g00014;Niben101Scf16898g00001;Niben101Scf24421g00002;Nicotiana_benthamiana_newGene_16592	K10960+K10960+K02492+K03403+K00218+K10960+K03403+K02492+K02492+K00510+K03405+K03403+K03403
Steroid biosynthesis	ko00100	7	76	764	12184	Niben101Scf00271g04029;Niben101Scf01718g07005;Niben101Scf02232g00001;Niben101Scf03969g04003;Niben101Scf04664g02013;Niben101Scf06738g02018;Nicotiana_benthamiana_newGene_18521	K09828+K08242+K09832+K09828+K00801+K00559+K00559
Purine metabolism	ko00230	19	462	764	12184	Niben101Scf00417g00008;Niben101Scf00887g00009;Niben101Scf01188g10004;Niben101Scf01646g00010;Niben101Scf01905g00009;Niben101Scf01950g03015;Niben101Scf02230g03027;Niben101Scf02510g05023;Niben101Scf03944g02014;Niben101Scf05552g00008;Niben101Scf06205g02014;Niben101Scf08137g03002;Niben101Scf08987g00006;Niben101Scf10919g01012;Niben101Scf11424g02004;Niben101Scf11685g00011;Niben101Scf14144g00014;Niben101…	K00873+K02325+K00940+K00759+K00939+K02685+K02327+K02326+K03017+K01835+K13811+K02325+K00759+K00764+K03010+K00948+K00939+K00939+K13811
Pentose and glucuronate interconversions	ko00040	14	235	764	12184	Niben101Scf00063g06042;Niben101Scf00457g09007;Niben101Scf01220g02011;Niben101Scf01687g05002;Niben101Scf02688g04013;Niben101Scf02853g06014;Niben101Scf02949g15002;Niben101Scf03444g01007;Niben101Scf06412g03016;Niben101Scf06999g01006;Niben101Scf07034g08030;Niben101Scf09817g02004;Niben101Scf11490g00015;Niben101Scf11814g00004	K01783+K01728+K01728+K01728+K00008+K01728+K01051+K01728+K01051+K01728+K01051+K01051+K01051+K01728
Ubiquitin mediated proteolysis	ko04120	7	312	764	12184	Niben101Scf03308g02011;Niben101Scf04783g13005;Niben101Scf05528g01009;Niben101Scf09242g02014;Niben101Scf09512g01014;Niben101Scf10095g02017;Niben101Scf12320g03008	K10591+K10604+K06689+K03363+K04706+K06689+K06688
Protein export	ko03060	3	133	764	12184	Niben101Scf00119g02012;Niben101Scf00369g07016;Niben101Scf01460g04011	K03217+K09490+K03118
RNA degradation	ko03018	9	269	764	12184	Niben101Scf01153g00016;Niben101Scf01372g05004;Niben101Scf02699g00016;Niben101Scf03223g02002;Niben101Scf03307g06009;Niben101Scf05467g04002;Niben101Scf07590g04001;Niben101Scf17834g01011;Niben101Scf25633g00014	K00850+K12581+K03679+K13126+K00850+K13126+K12619+K03654+K03654
Phenylalanine metabolism	ko00360	14	113	764	12184	Niben101Scf00262g05006;Niben101Scf01063g05023;Niben101Scf03164g07006;Niben101Scf03437g00008;Niben101Scf04090g02003;Niben101Scf04090g02004;Niben101Scf04652g00007;Niben101Scf05442g03015;Niben101Scf05617g00005;Niben101Scf07714g00008;Niben101Scf08030g04004;Niben101Scf08196g01007;Niben101Scf09997g00023;Niben101Scf12881g00009	K00487+K01904+K14454+K01904+K10775+K10775+K10775+K10775+K10775+K00815+K01426+K00487+K14454+K10775
Folate biosynthesis	ko00790	3	28	764	12184	Niben101Scf00406g00015;Niben101Scf06465g00001;Niben101Scf12841g02008	K13950+K13950+K01307
Pyrimidine metabolism	ko00240	12	370	764	12184	Niben101Scf00652g01007;Niben101Scf00675g01003;Niben101Scf00887g00009;Niben101Scf01188g10004;Niben101Scf01943g10013;Niben101Scf01950g03015;Niben101Scf02230g03027;Niben101Scf02510g05023;Niben101Scf03944g02014;Niben101Scf06700g02002;Niben101Scf08137g03002;Niben101Scf11424g02004	K01520+K00876+K02325+K00940+K00943+K02685+K02327+K02326+K03017+K00876+K02325+K03010
beta-Alanine metabolism	ko00410	1	102	764	12184	Niben101Scf03111g00003	K12259
Vitamin B6 metabolism	ko00750	7	29	764	12184	Niben101Ctg05133g00002;Niben101Ctg14184g00002;Niben101Scf00573g05005;Niben101Scf01694g01003;Niben101Scf04549g10017;Niben101Scf04549g10018;Niben101Scf09321g01008	K06215+K08681+K06215+K06215+K08681+K08681+K13248
N-Glycan biosynthesis	ko00510	1	99	764	12184	Niben101Scf00681g00005	K00737
Phenylpropanoid biosynthesis	ko00940	34	429	764	12184	Niben101Ctg16306g00002;Niben101Scf00077g05015;Niben101Scf00262g05006;Niben101Scf00286g05014;Niben101Scf00456g00003;Niben101Scf00709g02007;Niben101Scf00789g00009;Niben101Scf00857g01003;Niben101Scf01063g05023;Niben101Scf01181g01007;Niben101Scf01453g06003;Niben101Scf01721g07003;Niben101Scf02562g01010;Niben101Scf02590g01004;Niben101Scf02907g06028;Niben101Scf03437g00008;Niben101Scf03460g04004;Niben101…	K05350+K09754+K00487+K05349+K05350+K00430+K12355+K09754+K01904+K05350+K00430+K00430+K13065+K05350+K00083+K01904+K00430+K13065+K00430+K10775+K10775+K10775+K10775+K05349+K10775+K00430+K00487+K12355+K00430+K05349+K10775+K05349+K00430+K13065
Photosynthesis - antenna proteins	ko00196	44	80	764	12184	Niben101Ctg06879g00004;Niben101Ctg13927g00002;Niben101Ctg14049g00002;Niben101Scf00063g10004;Niben101Scf00063g10008;Niben101Scf00245g03004;Niben101Scf00264g03023;Niben101Scf00298g02018;Niben101Scf00406g03001;Niben101Scf00607g03013;Niben101Scf01105g00001;Niben101Scf01160g00002;Niben101Scf01160g01003;Niben101Scf01160g01005;Niben101Scf01276g00005;Niben101Scf01328g01012;Niben101Scf01517g08001;Niben101…	K08908+K08912+K08912+K08910+K08910+K08910+K14172+K08908+K08907+K08912+K08907+K08912+K08912+K08912+K08907+K08909+K08909+K08912+K08912+K08917+K08917+K14172+K08912+K08909+K08917+K08917+K08912+K08912+K08912+K08912+K08914+K08908+K08908+K08916+K08908+K08908+K08908+K08910+K08907+K08915+K08915+K08909+K08912+K08910
Alanine, aspartate and glutamate metabolism	ko00250	22	132	764	12184	Niben101Scf00288g18013;Niben101Scf00302g03028;Niben101Scf00573g01003;Niben101Scf00593g04019;Niben101Scf00797g18009;Niben101Scf00824g00002;Niben101Scf00870g03002;Niben101Scf00952g03003;Niben101Scf01765g02012;Niben101Scf01936g07002;Niben101Scf02330g00012;Niben101Scf02719g00006;Niben101Scf02937g04001;Niben101Scf03164g07006;Niben101Scf04011g00009;Niben101Scf05166g05002;Niben101Scf05880g03001;Niben101…	K00827+K00827+K01953+K00294+K00830+K01915+K00814+K01915+K01915+K01953+K01915+K00827+K14272+K14454+K00827+K00294+K01953+K00830+K00278+K14454+K14272+K00764
Peroxisome	ko04146	20	211	764	12184	Niben101Ctg10591g00003;Niben101Ctg14566g00003;Niben101Scf00163g08018;Niben101Scf00193g03008;Niben101Scf00436g05003;Niben101Scf00563g01003;Niben101Scf00622g00006;Niben101Scf00797g18009;Niben101Scf00897g02011;Niben101Scf01100g04008;Niben101Scf01497g03008;Niben101Scf01517g05010;Niben101Scf02041g04015;Niben101Scf04174g05001;Niben101Scf05197g01015;Niben101Scf06799g01001;Niben101Scf07123g00001;Niben101…	K03781+K04565+K04564+K13354+K04565+K13348+K11517+K00830+K11517+K01897+K03781+K11517+K03781+K11517+K01897+K04565+K00830+K11517+K03781+K04565
Cysteine and methionine metabolism	ko00270	21	260	764	12184	Niben101Scf00288g18013;Niben101Scf00302g03028;Niben101Scf01820g00025;Niben101Scf02004g00032;Niben101Scf02543g01008;Niben101Scf02719g00006;Niben101Scf03164g07006;Niben101Scf03226g01003;Niben101Scf04011g00009;Niben101Scf04053g03033;Niben101Scf04126g05024;Niben101Scf04843g00008;Niben101Scf05972g02009;Niben101Scf07327g03021;Niben101Scf07714g00008;Niben101Scf08039g01005;Niben101Scf09217g00024;Niben101…	K00827+K00827+K00789+K00026+K05933+K00827+K14454+K20772+K00827+K00026+K01611+K00826+K08967+K13034+K00815+K05933+K05933+K14454+K00558+K00558+K01761
Tryptophan metabolism	ko00380	8	79	764	12184	Niben101Ctg10591g00003;Niben101Scf00661g00002;Niben101Scf01497g03008;Niben101Scf02041g04015;Niben101Scf07793g02022;Niben101Scf08030g04004;Niben101Scf14996g00009;Niben101Scf18612g00001	K03781+K11820+K03781+K03781+K16903+K01426+K03781+K16903
Ribosome biogenesis in eukaryotes	ko03008	12	214	764	12184	Niben101Scf00005g01008;Niben101Scf01609g00009;Niben101Scf01985g04006;Niben101Scf02015g01022;Niben101Scf02348g05008;Niben101Scf02395g02002;Niben101Scf02632g03006;Niben101Scf05969g01002;Niben101Scf06641g01005;Niben101Scf07048g02008;Niben101Scf07590g04001;Niben101Scf12318g00006	K14544+K01164+K14549+K11128+K14548+K11131+K11129+K14544+K14521+K11128+K12619+K11128
Biotin metabolism	ko00780	1	44	764	12184	Niben101Scf02513g07008	K02372
Amino sugar and nucleotide sugar metabolism	ko00520	19	308	764	12184	Niben101Ctg12072g00001;Niben101Scf00279g01014;Niben101Scf00432g02007;Niben101Scf00893g01029;Niben101Scf01258g02001;Niben101Scf01520g08031;Niben101Scf01696g06050;Niben101Scf01789g03003;Niben101Scf02530g08016;Niben101Scf03056g00006;Niben101Scf03671g00015;Niben101Scf04339g00006;Niben101Scf04666g00003;Niben101Scf05109g02002;Niben101Scf05552g00008;Niben101Scf09403g00017;Niben101Scf11214g00007;Niben101…	K00847+K15920+K08678+K00975+K00847+K00975+K10046+K01183+K12446+K13379+K00975+K20867+K01183+K08679+K01835+K08678+K01183+K08678+K20867
Carbon fixation in photosynthetic organisms	ko00710	57	199	764	12184	Niben101Ctg10718g00002;Niben101Ctg14777g00001;Niben101Scf00063g06042;Niben101Scf00466g00012;Niben101Scf00621g05002;Niben101Scf00870g03002;Niben101Scf01025g01013;Niben101Scf01150g04004;Niben101Scf01369g05023;Niben101Scf01406g03019;Niben101Scf01433g08029;Niben101Scf01534g00018;Niben101Scf01991g04009;Niben101Scf01991g04010;Niben101Scf01991g05012;Niben101Scf01991g05015;Niben101Scf01991g05016;Niben101…	K01602+K05298+K01783+K01623+K01006+K00814+K01623+K03841+K05298+K03841+K01623+K01807+K01602+K01602+K01602+K01602+K01602+K00026+K01100+K01602+K00927+K01807+K01623+K03841+K14272+K01602+K01602+K05298+K14454+K01100+K01595+K00029+K00026+K00615+K01602+K01602+K01602+K00615+K01623+K01100+K03841+K05298+K05298+K05298+K01623+K00927+K01803+K01623+K01100+K14454+K14272+K03841+K00029+K00855+K00134+K00855+K01623
One carbon pool by folate	ko00670	7	50	764	12184	Niben101Scf00069g12017;Niben101Scf01048g00005;Niben101Scf02145g10005;Niben101Scf03710g06004;Niben101Scf04840g01004;Niben101Scf05438g05014;Niben101Scf07073g02007	K00600+K00600+K00605+K01433+K00600+K00605+K00600
Fatty acid elongation	ko00062	8	68	764	12184	Niben101Scf04180g02005;Niben101Scf04234g02011;Niben101Scf04738g03003;Niben101Scf07463g01017;Niben101Scf08351g04011;Niben101Scf08351g04013;Niben101Scf08523g00022;Niben101Scf09024g00004	K15397+K15397+K10258+K10258+K15397+K15397+K15397+K15397
SNARE interactions in vesicular transport	ko04130	1	95	764	12184	Niben101Scf07404g04001	K08486
Glycosaminoglycan degradation	ko00531	4	35	764	12184	Niben101Scf01718g01021;Niben101Scf06809g00033;Niben101Scf07849g01005;Niben101Scf09107g00007	K10532+K10532+K07964+K07964
Protein processing in endoplasmic reticulum	ko04141	18	549	764	12184	Niben101Scf00369g07016;Niben101Scf00970g02006;Niben101Scf01027g00003;Niben101Scf01027g01017;Niben101Scf01374g07002;Niben101Scf01704g00002;Niben101Scf02507g03001;Niben101Scf02771g01007;Niben101Scf02852g00013;Niben101Scf03000g01002;Niben101Scf03491g01017;Niben101Scf04364g01003;Niben101Scf04364g01014;Niben101Scf04490g00001;Niben101Scf04886g05003;Niben101Scf05528g01009;Niben101Scf10095g02017;Niben101…	K09490+K09503+K04079+K09580+K14004+K09517+K10666+K03283+K09487+K09487+K13993+K03283+K03283+K03283+K03283+K06689+K06689+K10666
Arginine and proline metabolism	ko00330	8	131	764	12184	Niben101Scf00593g04019;Niben101Scf02738g01016;Niben101Scf03111g00003;Niben101Scf03164g07006;Niben101Scf04126g05024;Niben101Scf05166g05002;Niben101Scf08030g04004;Niben101Scf09997g00023	K00294+K00318+K12259+K14454+K01611+K00294+K01426+K14454
Arachidonic acid metabolism	ko00590	2	26	764	12184	Niben101Scf02526g00002;Niben101Scf17339g00003	K00432+K00432
Monobactam biosynthesis	ko00261	2	16	764	12184	Niben101Scf06205g02014;Niben101Scf16508g00001	K13811+K13811
Homologous recombination	ko03440	11	149	764	12184	Niben101Scf00911g01004;Niben101Scf01429g00010;Niben101Scf01438g04009;Niben101Scf01683g08006;Niben101Scf02230g03027;Niben101Scf02451g06029;Niben101Scf03917g00017;Niben101Scf06042g03021;Niben101Scf07325g00030;Niben101Scf07424g02022;Niben101Scf12928g01009	K10739+K10739+K10739+K10882+K02327+K03165+K10901+K07466+K07466+K10882+K07466
Phagosome	ko04145	3	233	764	12184	Niben101Scf01326g05008;Niben101Scf06172g04003;Nicotiana_benthamiana_newGene_10645	K07374+K07374+K02153
Galactose metabolism	ko00052	5	125	764	12184	Niben101Scf01153g00016;Niben101Scf03167g02025;Niben101Scf03307g06009;Niben101Scf04632g03004;Niben101Scf05552g00008	K00850+K01193+K00850+K01193+K01835
Tropane, piperidine and pyridine alkaloid biosynthesis	ko00960	3	59	764	12184	Niben101Scf03164g07006;Niben101Scf07714g00008;Niben101Scf09997g00023	K14454+K00815+K14454
Fatty acid biosynthesis	ko00061	4	103	764	12184	Niben101Scf01100g04008;Niben101Scf02513g07008;Niben101Scf03479g05042;Niben101Scf05197g01015	K01897+K02372+K10782+K01897
Glycerophospholipid metabolism	ko00564	12	207	764	12184	Niben101Scf00123g06029;Niben101Scf00539g07022;Niben101Scf00996g02008;Niben101Scf01620g02013;Niben101Scf01822g13004;Niben101Scf02001g01005;Niben101Scf03865g00006;Niben101Scf04024g01004;Niben101Scf12266g00001;Niben101Scf12609g01009;Niben101Scf14688g00017;Niben101Scf25069g01006	K06130+K01115+K01094+K06130+K00630+K01115+K01115+K08730+K06130+K01115+K01115+K13508
Tyrosine metabolism	ko00350	9	91	764	12184	Niben101Scf03164g07006;Niben101Scf04078g01006;Niben101Scf05385g03007;Niben101Scf06556g07002;Niben101Scf07714g00008;Niben101Scf08156g01001;Niben101Scf09997g00023;Niben101Scf11319g00005;Niben101Scf28181g00009	K14454+K00001+K00121+K01557+K00815+K00422+K14454+K00121+K00422
Mismatch repair	ko03430	12	131	764	12184	Niben101Scf00911g01004;Niben101Scf01429g00010;Niben101Scf01438g04009;Niben101Scf01438g05003;Niben101Scf02230g03027;Niben101Scf03710g11002;Niben101Scf06042g03021;Niben101Scf07325g00030;Niben101Scf07672g00014;Niben101Scf07672g00015;Niben101Scf10384g02008;Niben101Scf12928g01009	K10739+K10739+K10739+K08737+K02327+K10756+K07466+K07466+K04802+K04802+K04802+K07466
Sesquiterpenoid and triterpenoid biosynthesis	ko00909	1	34	764	12184	Niben101Scf04664g02013	K00801
Carotenoid biosynthesis	ko00906	8	75	764	12184	Niben101Scf00151g10011;Niben101Scf01553g01001;Niben101Scf01873g01004;Niben101Scf02408g01007;Niben101Scf03953g06002;Niben101Scf06405g00006;Niben101Scf07253g01008;Niben101Scf16082g00007	K09842+K09838+K09843+K09843+K09843+K09843+K02291+K09838
Plant-pathogen interaction	ko04626	21	403	764	12184	Niben101Scf00057g00032;Niben101Scf00107g03008;Niben101Scf00262g04006;Niben101Scf00482g07009;Niben101Scf00747g12035;Niben101Scf01027g00003;Niben101Scf01297g04003;Niben101Scf01297g04006;Niben101Scf02362g02014;Niben101Scf02430g03006;Niben101Scf02437g06007;Niben101Scf02852g00013;Niben101Scf03000g01002;Niben101Scf03733g05002;Niben101Scf05813g03002;Niben101Scf06919g00029;Niben101Scf07019g01004;Niben101…	K13412+K13449+K13434+K18873+K13413+K04079+K13424+K13424+K13424+K13424+K13447+K09487+K09487+K13448+K13448+K13448+K13412+K13412+K13412+K05391+K02183
Aminoacyl-tRNA biosynthesis	ko00970	3	130	764	12184	Niben101Scf06825g00013;Niben101Scf08820g01004;Niben101Scf12789g00028	K01893+K04567+K01893
Arginine biosynthesis	ko00220	10	72	764	12184	Niben101Scf00824g00002;Niben101Scf00870g03002;Niben101Scf00952g03003;Niben101Scf01765g02012;Niben101Scf02330g00012;Niben101Scf02937g04001;Niben101Scf03164g07006;Niben101Scf06171g02032;Niben101Scf09997g00023;Niben101Scf10162g00004	K01915+K00814+K01915+K01915+K01915+K14272+K14454+K00611+K14454+K14272
Ribosome	ko03010	24	1031	764	12184	Niben101Scf00858g01009;Niben101Scf01164g00011;Niben101Scf01478g00014;Niben101Scf02437g02020;Niben101Scf02622g12036;Niben101Scf03236g02004;Niben101Scf03293g01010;Niben101Scf03595g10007;Niben101Scf04323g04023;Niben101Scf04529g00011;Niben101Scf04624g00012;Niben101Scf05142g00023;Niben101Scf06171g00001;Niben101Scf06840g00009;Niben101Scf06848g10001;Niben101Scf07008g00005;Niben101Scf09742g00031;Niben101…	K02895+K02992+K02942+K02961+K02992+K02913+K02873+K02942+K02975+K02967+K02943+K02992+K02909+K02886+K02989+K02922+K02916+K02958+K02913+K02902+K02895+K02958+K02879+K02891
Other glycan degradation	ko00511	1	33	764	12184	Niben101Scf03208g01009	K17108
Flavone and flavonol biosynthesis	ko00944	1	4	764	12184	Niben101Scf00974g01018	K05280
Pyruvate metabolism	ko00620	7	216	764	12184	Niben101Scf00417g00008;Niben101Scf00621g05002;Niben101Scf02004g00032;Niben101Scf03628g14021;Niben101Scf04046g00008;Niben101Scf04053g03033;Niben101Scf10650g00010	K00873+K01006+K00026+K01595+K00029+K00026+K00029
Glycerolipid metabolism	ko00561	8	148	764	12184	Niben101Scf01822g13004;Niben101Scf01991g03010;Niben101Scf02572g03008;Niben101Scf04323g02021;Niben101Scf06326g00032;Niben101Scf07165g00001;Niben101Scf18107g00014;Niben101Scf25069g01006	K00630+K01054+K15918+K01054+K03715+K01054+K15918+K13508
Proteasome	ko03050	2	153	764	12184	Niben101Scf10438g00008;Niben101Scf11706g00008	K03035+K03035
Riboflavin metabolism	ko00740	1	23	764	12184	Niben101Scf01866g03012	K14652
Citrate cycle (TCA cycle)	ko00020	2	134	764	12184	Niben101Scf02004g00032;Niben101Scf04053g03033	K00026+K00026
Glucosinolate biosynthesis	ko00966	1	6	764	12184	Niben101Scf00661g00002	K11820
RNA transport	ko03013	10	449	764	12184	Niben101Scf01374g07002;Niben101Scf01609g00009;Niben101Scf02714g06023;Niben101Scf03223g02002;Niben101Scf04283g10001;Niben101Scf05467g04002;Niben101Scf05676g06014;Niben101Scf06318g00005;Niben101Scf10749g02003;Niben101Scf12404g00003	K14004+K01164+K14297+K13126+K14319+K13126+K03242+K14293+K03113+K03754
Oxidative phosphorylation	ko00190	26	793	764	12184	Niben101Ctg15435g00001;Niben101Scf00149g02017;Niben101Scf00167g04011;Niben101Scf00167g04017;Niben101Scf00901g06008;Niben101Scf00960g03015;Niben101Scf01399g00012;Niben101Scf01510g00023;Niben101Scf02828g00004;Niben101Scf03376g04010;Niben101Scf04096g01008;Niben101Scf04529g00005;Niben101Scf04786g01004;Niben101Scf05079g00020;Niben101Scf07036g03002;Niben101Scf07515g01007;Niben101Scf07823g00002;Niben101…	K01507+K03936+K02111+K02108+K02265+K02113+K02115+K02109+K02133+K01507+K05577+K02111+K02109+K03881+K01507+K02109+K05579+K01535+K02115+K02113+K00413+K02265+K02109+K02110+K02153+K02132
Regulation of autophagy	ko04140	3	77	764	12184	Niben101Scf00110g00006;Niben101Scf01236g00013;Niben101Scf12103g00013	K08332+K07198+K07198
AGE-RAGE signaling pathway in diabetic complications	ko04933	1	31	764	12184	Niben101Scf02280g02004	K05857
Flavonoid biosynthesis	ko00941	13	88	764	12184	Niben101Scf00077g05015;Niben101Scf00262g05006;Niben101Scf00536g15017;Niben101Scf00857g01003;Niben101Scf00974g01018;Niben101Scf01146g13015;Niben101Scf02562g01010;Niben101Scf02893g00001;Niben101Scf03790g00015;Niben101Scf05989g01008;Niben101Scf08196g01007;Niben101Scf09345g00004;Nicotiana_benthamiana_newGene_17267	K09754+K00487+K00660+K09754+K05280+K00660+K13065+K00660+K13065+K01859+K00487+K00475+K13065
Glycine, serine and threonine metabolism	ko00260	28	182	764	12184	Niben101Ctg11026g00001;Niben101Scf00069g12017;Niben101Scf00288g18013;Niben101Scf00302g03028;Niben101Scf00797g18009;Niben101Scf01048g00005;Niben101Scf01125g01006;Niben101Scf01526g04020;Niben101Scf01718g01001;Niben101Scf02145g10005;Niben101Scf02480g02012;Niben101Scf02541g04005;Niben101Scf02572g03008;Niben101Scf02719g00006;Niben101Scf02937g04001;Niben101Scf03076g02004;Niben101Scf03287g00008;Niben101…	K15634+K00600+K00827+K00827+K00830+K00600+K02437+K02437+K15893+K00605+K00281+K01696+K15918+K00827+K14272+K02437+K15919+K15919+K01620+K00827+K00600+K00605+K02437+K15893+K00600+K00830+K14272+K15918
Phenylalanine, tyrosine and tryptophan biosynthesis	ko00400	11	108	764	12184	Niben101Scf00409g00002;Niben101Scf01450g00005;Niben101Scf01664g02022;Niben101Scf02541g04005;Niben101Scf03164g07006;Niben101Scf04763g02011;Niben101Scf07714g00008;Niben101Scf09997g00023;Niben101Scf10007g01002;Niben101Scf10126g00007;Niben101Scf10152g01008	K01736+K01626+K01735+K01696+K14454+K01850+K00815+K14454+K00891+K15227+K15227
Plant hormone signal transduction	ko04075	36	646	764	12184	Niben101Scf00107g03008;Niben101Scf00152g20002;Niben101Scf00253g03001;Niben101Scf00503g03007;Niben101Scf01221g00001;Niben101Scf01594g00001;Niben101Scf01657g03002;Niben101Scf01897g07006;Niben101Scf01940g00011;Niben101Scf02111g17003;Niben101Scf02217g06006;Niben101Scf02280g08005;Niben101Scf02572g02001;Niben101Scf02688g00009;Niben101Scf03104g00008;Niben101Scf03652g03003;Niben101Scf03713g00001;Niben101…	K13449+K14486+K14487+K14506+K14484+K14488+K14488+K14496+K13464+K14494+K14490+K13463+K14484+K14514+K14510+K14484+K14505+K14431+K14431+K14500+K14484+K14493+K14505+K14486+K14516+K14432+K14489+K14489+K12126+K14484+K14484+K14490+K14515+K13422+K14516+K13946
mRNA surveillance pathway	ko03015	6	305	764	12184	Niben101Scf00571g05009;Niben101Scf02111g11033;Niben101Scf03223g02002;Niben101Scf05467g04002;Niben101Scf08006g01001;Niben101Scf10343g01001	K04382+K14405+K13126+K13126+K14405+K06269
Diterpenoid biosynthesis	ko00904	4	68	764	12184	Niben101Scf01517g04011;Niben101Scf02322g07001;Niben101Scf02461g04014;Niben101Scf07482g00003	K04125+K04122+K04121+K04123
Butanoate metabolism	ko00650	1	56	764	12184	Niben101Scf01513g01010	K18121
Basal transcription factors	ko03022	1	94	764	12184	Niben101Scf01150g03001	K10842
ABC transporters	ko02010	3	61	764	12184	Niben101Scf01326g05006;Niben101Scf01402g00003;Niben101Scf06172g04005	K05658+K05658+K05658
RNA polymerase	ko03020	2	193	764	12184	Niben101Scf03944g02014;Niben101Scf11424g02004	K03017+K03010
Lysine degradation	ko00310	2	61	764	12184	Niben101Scf02705g02021;Niben101Scf06187g01028	K11420+K11420
Isoquinoline alkaloid biosynthesis	ko00950	5	61	764	12184	Niben101Scf03164g07006;Niben101Scf07714g00008;Niben101Scf08156g01001;Niben101Scf09997g00023;Niben101Scf28181g00009	K14454+K00815+K00422+K14454+K00422
Fatty acid metabolism	ko01212	6	168	764	12184	Niben101Scf01100g04008;Niben101Scf02513g07008;Niben101Scf04738g03003;Niben101Scf05197g01015;Niben101Scf07463g01017;Niben101Scf09417g01008	K01897+K02372+K10258+K01897+K10258+K10256
Carbon metabolism	ko01200	94	652	764	12184	Niben101Ctg10591g00003;Niben101Ctg10718g00002;Niben101Ctg11026g00001;Niben101Ctg14777g00001;Niben101Scf00063g06042;Niben101Scf00069g12017;Niben101Scf00417g00008;Niben101Scf00466g00012;Niben101Scf00578g03001;Niben101Scf00621g05002;Niben101Scf00622g00006;Niben101Scf00797g18009;Niben101Scf00870g03002;Niben101Scf00897g02011;Niben101Scf01025g01013;Niben101Scf01048g00005;Niben101Scf01150g04004;Niben101…	K03781+K01602+K15634+K05298+K01783+K00600+K00873+K01623+K00851+K01006+K11517+K00830+K00814+K11517+K01623+K00600+K03841+K00850+K05298+K03841+K01623+K03781+K18121+K11517+K01057+K01807+K15893+K01602+K01602+K01602+K01602+K01602+K00026+K03781+K00605+K01100+K01602+K00927+K00281+K15918+K01807+K01623+K03841+K14272+K01602+K01602+K05298+K14454+K15919+K15919+K00850+K01100+K01595+K00029+K00026+K00615+K11517+…
Phosphatidylinositol signaling system	ko04070	6	161	764	12184	Niben101Scf02122g00006;Niben101Scf02280g02004;Niben101Scf10818g00020;Niben101Scf14010g00010;Niben101Scf25265g00010;Niben101Scf35487g00005	K00889+K05857+K00888+K00889+K13024+K02183
Other types of O-glycan biosynthesis	ko00514	1	9	764	12184	Niben101Scf00870g01013	K03691
Monoterpenoid biosynthesis	ko00902	3	15	764	12184	Niben101Scf02497g01020;Niben101Scf04895g00008;Niben101Scf05078g08027	K15095+K15095+K15095
Circadian rhythm - plant	ko04712	11	94	764	12184	Niben101Scf00063g06009;Niben101Scf00225g05002;Niben101Scf00536g15017;Niben101Scf01146g13015;Niben101Scf01994g01007;Niben101Scf02211g03005;Niben101Scf02893g00001;Niben101Scf04641g03006;Niben101Scf08702g02005;Niben101Scf09353g03003;Niben101Scf11126g02001	K12127+K12130+K00660+K00660+K12129+K12116+K00660+K12124+K16223+K12126+K16223
Sphingolipid metabolism	ko00600	2	66	764	12184	Niben101Scf03208g01009;Niben101Scf11399g00011	K17108+K04708
DNA replication	ko03030	20	157	764	12184	Niben101Scf00887g00009;Niben101Scf00911g01004;Niben101Scf01429g00010;Niben101Scf01438g04009;Niben101Scf01950g03015;Niben101Scf02230g03027;Niben101Scf02510g05023;Niben101Scf02693g02014;Niben101Scf03710g11002;Niben101Scf06042g03021;Niben101Scf07325g00030;Niben101Scf07672g00014;Niben101Scf07672g00015;Niben101Scf07728g02014;Niben101Scf08137g03002;Niben101Scf08240g01016;Niben101Scf10122g01005;Niben101…	K02325+K10739+K10739+K10739+K02685+K02327+K02326+K02210+K10756+K07466+K07466+K04802+K04802+K02541+K02325+K10743+K02542+K04802+K02209+K07466
Spliceosome	ko03040	12	520	764	12184	Niben101Scf00138g03003;Niben101Scf01397g00012;Niben101Scf01782g05006;Niben101Scf02771g01007;Niben101Scf03819g03027;Niben101Scf04364g01003;Niben101Scf04364g01014;Niben101Scf04490g00001;Niben101Scf04886g05003;Niben101Scf08160g00001;Niben101Scf10616g01013;Niben101Scf24868g00004	K12813+K12823+K11087+K03283+K12741+K03283+K03283+K03283+K03283+K12854+K12741+K11086
Endocytosis	ko04144	16	423	764	12184	Niben101Scf00539g07022;Niben101Scf02001g01005;Niben101Scf02122g00006;Niben101Scf02522g01002;Niben101Scf02771g01007;Niben101Scf03308g02011;Niben101Scf03865g00006;Niben101Scf04205g04013;Niben101Scf04364g01003;Niben101Scf04364g01014;Niben101Scf04490g00001;Niben101Scf04886g05003;Niben101Scf05617g01020;Niben101Scf12609g01009;Niben101Scf14010g00010;Niben101Scf14688g00017	K01115+K01115+K00889+K19476+K03283+K10591+K01115+K12199+K03283+K03283+K03283+K03283+K07904+K01115+K00889+K01115
Biosynthesis of unsaturated fatty acids	ko01040	3	61	764	12184	Niben101Scf04738g03003;Niben101Scf07463g01017;Niben101Scf09417g01008	K10258+K10258+K10256
Inositol phosphate metabolism	ko00562	8	153	764	12184	Niben101Scf02023g01002;Niben101Scf02122g00006;Niben101Scf02280g02004;Niben101Scf06016g08006;Niben101Scf08794g00003;Niben101Scf10818g00020;Niben101Scf14010g00010;Niben101Scf16254g00008	K01858+K00889+K05857+K01858+K01803+K00888+K00889+K01858
2-Oxocarboxylic acid metabolism	ko01210	7	124	764	12184	Niben101Scf00661g00002;Niben101Scf00870g03002;Niben101Scf02937g04001;Niben101Scf03164g07006;Niben101Scf04843g00008;Niben101Scf09997g00023;Niben101Scf10162g00004	K11820+K00814+K14272+K14454+K00826+K14454+K14272
Propanoate metabolism	ko00640	1	104	764	12184	Niben101Scf01641g01011	K00166
Starch and sucrose metabolism	ko00500	42	525	764	12184	Niben101Ctg12072g00001;Niben101Ctg16306g00002;Niben101Scf00279g01014;Niben101Scf00286g05014;Niben101Scf00432g02007;Niben101Scf00456g00003;Niben101Scf00887g01011;Niben101Scf00893g01029;Niben101Scf01181g01007;Niben101Scf01258g02001;Niben101Scf01493g00007;Niben101Scf01520g08031;Niben101Scf01983g06011;Niben101Scf02219g00002;Niben101Scf02289g10020;Niben101Scf02590g01004;Niben101Scf02854g08010;Niben101…	K00847+K05350+K15920+K05349+K08678+K05350+K00695+K00975+K05350+K00847+K01176+K00975+K16055+K01087+K00688+K05350+K19891+K01051+K01193+K00975+K01087+K20867+K01193+K01087+K08679+K01835+K05349+K01051+K00695+K01051+K00696+K01177+K08678+K01051+K01177+K01087+K01051+K05349+K08678+K05349+K20867+K00696
Selenocompound metabolism	ko00450	3	62	764	12184	Niben101Scf06205g02014;Niben101Scf16508g00001;Nicotiana_benthamiana_newGene_12747	K13811+K13811+K01761
Cyanoamino acid metabolism	ko00460	13	110	764	12184	Niben101Ctg16306g00002;Niben101Scf00069g12017;Niben101Scf00286g05014;Niben101Scf00456g00003;Niben101Scf01048g00005;Niben101Scf01181g01007;Niben101Scf02590g01004;Niben101Scf04840g01004;Niben101Scf05588g08004;Niben101Scf07073g02007;Niben101Scf07327g03021;Niben101Scf11802g00009;Niben101Scf13289g02018	K05350+K00600+K05349+K05350+K00600+K05350+K05350+K00600+K05349+K00600+K13034+K05349+K05349
Glycolysis / Gluconeogenesis	ko00010	28	294	764	12184	Niben101Ctg11026g00001;Niben101Scf00417g00008;Niben101Scf00466g00012;Niben101Scf01025g01013;Niben101Scf01037g01013;Niben101Scf01150g04004;Niben101Scf01153g00016;Niben101Scf01406g03019;Niben101Scf01433g08029;Niben101Scf02461g00004;Niben101Scf02864g04008;Niben101Scf02902g02003;Niben101Scf03307g06009;Niben101Scf04078g01006;Niben101Scf04664g01003;Niben101Scf05047g04009;Niben101Scf05048g00010;Niben101…	K15634+K00873+K01623+K01623+K00895+K03841+K00850+K03841+K01623+K00927+K01623+K03841+K00850+K00001+K01623+K00895+K03841+K00895+K00121+K01623+K01835+K00927+K01803+K01623+K03841+K00121+K00134+K01623
Ether lipid metabolism	ko00565	5	62	764	12184	Niben101Scf00539g07022;Niben101Scf02001g01005;Niben101Scf03865g00006;Niben101Scf12609g01009;Niben101Scf14688g00017	K01115+K01115+K01115+K01115+K01115
Stilbenoid, diarylheptanoid and gingerol biosynthesis	ko00945	7	61	764	12184	Niben101Scf00077g05015;Niben101Scf00262g05006;Niben101Scf00857g01003;Niben101Scf02562g01010;Niben101Scf03790g00015;Niben101Scf08196g01007;Nicotiana_benthamiana_newGene_17267	K09754+K00487+K09754+K13065+K13065+K00487+K13065
Ascorbate and aldarate metabolism	ko00053	7	96	764	12184	Niben101Scf00254g00005;Niben101Scf00726g02017;Niben101Scf01696g06050;Niben101Scf02367g05038;Niben101Scf02537g02023;Niben101Scf08035g00004;Niben101Scf13186g03006	K08232+K14190+K10046+K00434+K00434+K14190+K08232
KEGG pathway analysis of DEGs in C+H vs C+B.
#Pathway	ko_ID	DEG	Gene	DEG_all	Gene_all	Genes
Phagosome	ko04145	2	233	198	12184	Niben101Scf03329g01002;Niben101Scf03647g03024	K07375+K07375
Alanine, aspartate and glutamate metabolism	ko00250	1	132	198	12184	Niben101Scf00824g00002	K01915
Terpenoid backbone biosynthesis	ko00900	2	124	198	12184	Niben101Scf02387g03005;Niben101Scf02399g01011	K13789+K01662
Carotenoid biosynthesis	ko00906	1	75	198	12184	Niben101Scf01873g01004	K09843
Protein processing in endoplasmic reticulum	ko04141	13	549	198	12184	Niben101Scf00317g09001;Niben101Scf00970g02006;Niben101Scf01294g05002;Niben101Scf02215g05009;Niben101Scf02513g00006;Niben101Scf03114g03011;Niben101Scf03817g16010;Niben101Scf04091g00013;Niben101Scf04490g00001;Niben101Scf05336g00011;Niben101Scf05506g06005;Niben101Scf06684g01005;Niben101Scf07275g02012	K13993+K09503+K10666+K10666+K13993+K04079+K09503+K13993+K03283+K07953+K03283+K04079+K03283
Nucleotide excision repair	ko03420	5	175	198	12184	Niben101Scf01429g00010;Niben101Scf02510g05023;Niben101Scf03710g11002;Niben101Scf07325g00030;Niben101Scf07672g00014	K10739+K02326+K10756+K07466+K04802
Pentose and glucuronate interconversions	ko00040	6	235	198	12184	Niben101Scf00457g09007;Niben101Scf01220g02011;Niben101Scf01687g05002;Niben101Scf06412g03016;Niben101Scf06999g01006;Niben101Scf11814g00004	K01728+K01728+K01728+K01051+K01728+K01728
Biotin metabolism	ko00780	2	44	198	12184	Niben101Scf05767g07012;Niben101Scf08030g04001	K00059+K00059
Pentose phosphate pathway	ko00030	1	124	198	12184	Niben101Scf11685g00011	K00948
Starch and sucrose metabolism	ko00500	9	525	198	12184	Niben101Scf00286g05014;Niben101Scf00456g00010;Niben101Scf01258g02001;Niben101Scf02854g08010;Niben101Scf03167g02025;Niben101Scf04910g01004;Niben101Scf06412g03016;Niben101Scf08478g02009;Niben101Scf21401g00003	K05349+K05350+K00847+K19891+K01193+K00695+K01051+K00696+K01179
Sphingolipid metabolism	ko00600	1	66	198	12184	Niben101Scf04422g00011	K04716
Other glycan degradation	ko00511	1	33	198	12184	Niben101Scf02017g00001	K12373
Flavonoid biosynthesis	ko00941	3	88	198	12184	Niben101Scf00974g01018;Niben101Scf02562g01010;Niben101Scf03790g00015	K05280+K13065+K13065
Carbon metabolism	ko01200	5	652	198	12184	Niben101Ctg10591g00003;Niben101Scf00417g00008;Niben101Scf02041g04015;Niben101Scf11685g00011;Niben101Scf14996g00009	K03781+K00873+K03781+K00948+K03781
Flavone and flavonol biosynthesis	ko00944	1	4	198	12184	Niben101Scf00974g01018	K05280
Pyrimidine metabolism	ko00240	8	370	198	12184	Niben101Scf00369g21009;Niben101Scf00652g01007;Niben101Scf01073g04022;Niben101Scf01950g03015;Niben101Scf01987g01006;Niben101Scf02510g05023;Niben101Scf04003g04002;Niben101Scf11424g02004	K01520+K01520+K02321+K02685+K00857+K02326+K02320+K03010
Nicotinate and nicotinamide metabolism	ko00760	1	50	198	12184	Niben101Scf05955g03003	K18551
Ribosome biogenesis in eukaryotes	ko03008	1	214	198	12184	Niben101Scf07841g01012	K07562
Glyoxylate and dicarboxylate metabolism	ko00630	6	210	198	12184	Niben101Ctg10591g00003;Niben101Scf00824g00002;Niben101Scf01125g01006;Niben101Scf02041g04015;Niben101Scf02156g15009;Niben101Scf14996g00009	K03781+K01915+K02437+K03781+K02437+K03781
Tryptophan metabolism	ko00380	5	79	198	12184	Niben101Ctg10591g00003;Niben101Scf00661g00002;Niben101Scf02041g04015;Niben101Scf14996g00009;Niben101Scf18612g00001	K03781+K11820+K03781+K03781+K16903
RNA transport	ko03013	3	449	198	12184	Niben101Scf06318g00005;Niben101Scf07841g01012;Niben101Scf10749g02003	K14293+K07562+K03113
Arginine and proline metabolism	ko00330	1	131	198	12184	Niben101Scf00887g02006	K01581
Glycosphingolipid biosynthesis - ganglio series	ko00604	1	9	198	12184	Niben101Scf02017g00001	K12373
Phenylpropanoid biosynthesis	ko00940	13	429	198	12184	Niben101Scf00286g05014;Niben101Scf00456g00010;Niben101Scf00751g00001;Niben101Scf01721g07003;Niben101Scf02562g01010;Niben101Scf02907g06028;Niben101Scf03460g04004;Niben101Scf03790g00015;Niben101Scf03990g00010;Niben101Scf05245g02003;Niben101Scf05649g01008;Niben101Scf06602g00001;Niben101Scf08338g00001	K05349+K05350+K00430+K00430+K13065+K00083+K00430+K13065+K00430+K00083+K00430+K00430+K00430
DNA replication	ko03030	10	157	198	12184	Niben101Scf01073g04022;Niben101Scf01429g00010;Niben101Scf01950g03015;Niben101Scf02510g05023;Niben101Scf03710g11002;Niben101Scf04003g04002;Niben101Scf07325g00030;Niben101Scf07672g00014;Niben101Scf10122g01005;Niben101Scf11936g01017	K02321+K10739+K02685+K02326+K10756+K02320+K07466+K04802+K02542+K02209
Ribosome	ko03010	4	1031	198	12184	Niben101Scf01478g00014;Niben101Scf05583g00006;Niben101Scf10431g00014;Niben101Scf16244g02026	K02942+K02880+K02958+K02958
Thiamine metabolism	ko00730	1	24	198	12184	Niben101Scf02399g01011	K01662
Base excision repair	ko03410	2	98	198	12184	Niben101Scf02510g05023;Niben101Scf07672g00014	K02326+K04802
RNA polymerase	ko03020	1	193	198	12184	Niben101Scf11424g02004	K03010
Circadian rhythm - plant	ko04712	1	94	198	12184	Niben101Scf08702g02005	K16223
N-Glycan biosynthesis	ko00510	1	99	198	12184	Niben101Scf03143g05002	K00737
Arginine biosynthesis	ko00220	2	72	198	12184	Niben101Scf00824g00002;Niben101Scf06171g02032	K01915+K00611
AGE-RAGE signaling pathway in diabetic complications	ko04933	1	31	198	12184	Niben101Scf11417g00013	K05857
Homologous recombination	ko03440	2	149	198	12184	Niben101Scf01429g00010;Niben101Scf07325g00030	K10739+K07466
Sesquiterpenoid and triterpenoid biosynthesis	ko00909	2	34	198	12184	Niben101Scf00739g04029;Niben101Scf06023g02015	K15813+K00801
Glycine, serine and threonine metabolism	ko00260	4	182	198	12184	Niben101Scf01125g01006;Niben101Scf02156g15009;Niben101Scf02541g04005;Niben101Scf03435g01016	K02437+K02437+K01696+K01620
Glucosinolate biosynthesis	ko00966	1	6	198	12184	Niben101Scf00661g00002	K11820
Cysteine and methionine metabolism	ko00270	7	260	198	12184	Niben101Scf02334g00004;Niben101Scf02543g01008;Niben101Scf02918g00003;Niben101Scf03226g01003;Niben101Scf06180g00015;Niben101Scf08039g01005;Niben101Scf13622g01020	K20772+K05933+K05933+K20772+K20772+K05933+K05933
Phenylalanine, tyrosine and tryptophan biosynthesis	ko00400	1	108	198	12184	Niben101Scf02541g04005	K01696
Inositol phosphate metabolism	ko00562	2	153	198	12184	Niben101Scf11417g00013;Niben101Scf16254g00008	K05857+K01858
Purine metabolism	ko00230	7	462	198	12184	Niben101Scf00417g00008;Niben101Scf01073g04022;Niben101Scf01950g03015;Niben101Scf02510g05023;Niben101Scf04003g04002;Niben101Scf11424g02004;Niben101Scf11685g00011	K00873+K02321+K02685+K02326+K02320+K03010+K00948
Biosynthesis of amino acids	ko01230	6	566	198	12184	Niben101Scf00417g00008;Niben101Scf00824g00002;Niben101Scf02541g04005;Niben101Scf03435g01016;Niben101Scf06171g02032;Niben101Scf11685g00011	K00873+K01915+K01696+K01620+K00611+K00948
Plant-pathogen interaction	ko04626	25	403	198	12184	Niben101Scf00069g15020;Niben101Scf00109g07005;Niben101Scf00482g07009;Niben101Scf00747g12035;Niben101Scf00800g02008;Niben101Scf01297g04003;Niben101Scf01297g04006;Niben101Scf02195g01001;Niben101Scf02362g02014;Niben101Scf02430g03006;Niben101Scf03114g03011;Niben101Scf03374g08019;Niben101Scf04133g02009;Niben101Scf05029g02016;Niben101Scf05060g07008;Niben101Scf05811g08010;Niben101Scf06684g01005;Niben101…	K13448+K13448+K18873+K13413+K13412+K13424+K13424+K13448+K13424+K13424+K04079+K13420+K02183+K13448+K02183+K13420+K04079+K13412+K13448+K13448+K13448+K13412+K13448+K13448+K13412
alpha-Linolenic acid metabolism	ko00592	2	88	198	12184	Niben101Scf00779g06009;Niben101Scf02749g01001	K05894+K00454
Tyrosine metabolism	ko00350	2	91	198	12184	Niben101Scf08156g01001;Niben101Scf28181g00009	K00422+K00422
SNARE interactions in vesicular transport	ko04130	3	95	198	12184	Niben101Scf02093g00004;Niben101Scf02767g04005;Niben101Scf05694g00009	K08486+K08486+K08486
Fructose and mannose metabolism	ko00051	1	154	198	12184	Niben101Scf01258g02001	K00847
RNA degradation	ko03018	6	269	198	12184	Niben101Scf01372g05004;Niben101Scf01750g15003;Niben101Scf08034g01002;Niben101Scf10855g08005;Niben101Scf17834g01011;Niben101Scf25633g00014	K12581+K12581+K12581+K12581+K03654+K03654
Glycosphingolipid biosynthesis - globo series	ko00603	1	19	198	12184	Niben101Scf02017g00001	K12373
Mismatch repair	ko03430	5	131	198	12184	Niben101Scf01429g00010;Niben101Scf01438g05003;Niben101Scf03710g11002;Niben101Scf07325g00030;Niben101Scf07672g00014	K10739+K08737+K10756+K07466+K04802
Sulfur metabolism	ko00920	1	74	198	12184	Niben101Scf00327g00011	K05907
Isoquinoline alkaloid biosynthesis	ko00950	2	61	198	12184	Niben101Scf08156g01001;Niben101Scf28181g00009	K00422+K00422
Steroid biosynthesis	ko00100	2	76	198	12184	Niben101Scf01718g07005;Niben101Scf06023g02015	K08242+K00801
Ubiquitin mediated proteolysis	ko04120	3	312	198	12184	Niben101Scf03203g02001;Niben101Scf04783g13005;Niben101Scf12320g03008	K03364+K10604+K06688
Phosphatidylinositol signaling system	ko04070	3	161	198	12184	Niben101Scf04133g02009;Niben101Scf05060g07008;Niben101Scf11417g00013	K02183+K02183+K05857
Endocytosis	ko04144	10	423	198	12184	Niben101Scf00525g04008;Niben101Scf02522g01002;Niben101Scf02816g01009;Niben101Scf03238g00012;Niben101Scf04205g04013;Niben101Scf04490g00001;Niben101Scf05011g00001;Niben101Scf05506g06005;Niben101Scf07275g02012;Niben101Scf39364g00010	K12198+K19476+K19476+K19476+K12199+K03283+K12183+K03283+K03283+K19366
Nitrogen metabolism	ko00910	3	84	198	12184	Niben101Scf00824g00002;Niben101Scf01735g00005;Niben101Scf34590g00006	K01915+K10534+K10534
Photosynthesis - antenna proteins	ko00196	2	80	198	12184	Niben101Ctg13927g00002;Niben101Ctg14049g00002	K08912+K08912
Diterpenoid biosynthesis	ko00904	1	68	198	12184	Niben101Scf07482g00003	K04123
Stilbenoid, diarylheptanoid and gingerol biosynthesis	ko00945	2	61	198	12184	Niben101Scf02562g01010;Niben101Scf03790g00015	K13065+K13065
Plant hormone signal transduction	ko04075	17	646	198	12184	Niben101Scf00152g20002;Niben101Scf00253g03001;Niben101Scf00530g10010;Niben101Scf01524g00006;Niben101Scf02217g06006;Niben101Scf02832g01021;Niben101Scf03240g00008;Niben101Scf04907g01013;Niben101Scf05643g01012;Niben101Scf06267g01005;Niben101Scf06822g04004;Niben101Scf07160g00025;Niben101Scf07761g02006;Niben101Scf10124g01002;Niben101Scf15224g00002;Niben101Scf15451g00001;Niben101Scf24330g00014	K14486+K14487+K14497+K14488+K14490+K14505+K14494+K14486+K14505+K14488+K13422+K14488+K14516+K14484+K13422+K14516+K14484
Porphyrin and chlorophyll metabolism	ko00860	1	100	198	12184	Niben101Scf10434g00020	K02492
Oxidative phosphorylation	ko00190	1	793	198	12184	Niben101Scf07395g00031	K01535
Fatty acid metabolism	ko01212	2	168	198	12184	Niben101Scf05767g07012;Niben101Scf08030g04001	K00059+K00059
Glycerophospholipid metabolism	ko00564	2	207	198	12184	Niben101Scf04024g01004;Niben101Scf15979g02003	K08730+K06130
Amino sugar and nucleotide sugar metabolism	ko00520	3	308	198	12184	Niben101Scf01258g02001;Niben101Scf02017g00001;Niben101Scf02530g08016	K00847+K12373+K12446
Peroxisome	ko04146	3	211	198	12184	Niben101Ctg10591g00003;Niben101Scf02041g04015;Niben101Scf14996g00009	K03781+K03781+K03781
Pyruvate metabolism	ko00620	1	216	198	12184	Niben101Scf00417g00008	K00873
2-Oxocarboxylic acid metabolism	ko01210	1	124	198	12184	Niben101Scf00661g00002	K11820
Zeatin biosynthesis	ko00908	4	85	198	12184	Niben101Scf01612g03002;Niben101Scf01777g03010;Niben101Scf01782g00011;Niben101Scf04283g02008	K00279+K13495+K10760+K10760
Fatty acid elongation	ko00062	2	68	198	12184	Niben101Scf02613g03001;Niben101Scf08523g00022	K15397+K15397
Fatty acid biosynthesis	ko00061	2	103	198	12184	Niben101Scf05767g07012;Niben101Scf08030g04001	K00059+K00059
Glutathione metabolism	ko00480	15	180	198	12184	Niben101Scf00887g02006;Niben101Scf00897g03002;Niben101Scf02086g01010;Niben101Scf02325g03024;Niben101Scf03147g09006;Niben101Scf03147g10010;Niben101Scf03147g10015;Niben101Scf03263g03004;Niben101Scf04174g01008;Niben101Scf08130g00014;Niben101Scf08196g01001;Niben101Scf10316g03002;Niben101Scf10316g03003;Niben101Scf10316g03004;Niben101Scf11767g02018	K01581+K00799+K00799+K00799+K00799+K00799+K00799+K00799+K00799+K00799+K00799+K00799+K00799+K00799+K00799
Cutin, suberine and wax biosynthesis	ko00073	2	61	198	12184	Niben101Scf02831g08009;Niben101Scf17380g00003	K15403+K15404
Linoleic acid metabolism	ko00591	1	37	198	12184	Niben101Scf02749g01001	K00454
Spliceosome	ko03040	3	520	198	12184	Niben101Scf04490g00001;Niben101Scf05506g06005;Niben101Scf07275g02012	K03283+K03283+K03283
Biosynthesis of unsaturated fatty acids	ko01040	2	61	198	12184	Niben101Scf05767g07012;Niben101Scf08030g04001	K00059+K00059
Cyanoamino acid metabolism	ko00460	2	110	198	12184	Niben101Scf00286g05014;Niben101Scf00456g00010	K05349+K05350
Glycosaminoglycan degradation	ko00531	3	35	198	12184	Niben101Scf02017g00001;Niben101Scf06809g00033;Niben101Scf09107g00007	K12373+K10532+K07964
Glycolysis / Gluconeogenesis	ko00010	1	294	198	12184	Niben101Scf00417g00008	K00873
ABC transporters	ko02010	1	61	198	12184	Niben101Scf06172g04005	K05658
Galactose metabolism	ko00052	1	125	198	12184	Niben101Scf03167g02025	K01193
note: P+H, PBS solution + H2O; P+B, PBS solution + boron; C+H, CGMMV + H2O; C+B, CGMMV + boron.
