# Supplementary material for: Reactive oxygen species-related genes participate in resistance to cucumber green mottle mosaic virus infection regulated by boron in Nicotiana benthamiana and watermelon
Source: Front Plant Sci. 2022 Nov 11;13:1027404. doi: 10.3389/fpls.2022.1027404 (PMC9691971; doi:10.3389/fpls.2022.1027404)
Supplement: Supplementary file 8 [file Table_7.xlsx]

## Sheet: Sheet1
Supplementary Table 7. Total DEGs in each module of WGCNA.
#ID	kME	Module
Niben101Ctg03201g00001	0.981168	blue
Niben101Ctg08693g00002	0.960719	blue
Niben101Ctg11091g00003	0.997766	blue
Niben101Ctg12033g00001	0.970934	blue
Niben101Ctg12683g00001	0.998324	blue
Niben101Ctg13782g00003	0.997457	blue
Niben101Ctg14686g00002	0.909025	blue
Niben101Ctg15635g00003	0.962824	blue
Niben101Ctg16115g00003	0.980892	blue
Niben101Ctg16385g00003	0.993578	blue
Niben101Scf00069g07004	0.927674	blue
Niben101Scf00069g10002	0.89356	blue
Niben101Scf00069g15020	0.997207	blue
Niben101Scf00073g04002	0.978998	blue
Niben101Scf00080g05006	0.999074	blue
Niben101Scf00107g02001	0.977455	blue
Niben101Scf00109g07005	0.999581	blue
Niben101Scf00163g04004	0.992886	blue
Niben101Scf00163g22002	0.988949	blue
Niben101Scf00163g22003	0.979148	blue
Niben101Scf00163g22004	0.986585	blue
Niben101Scf00189g06007	0.979622	blue
Niben101Scf00207g03002	0.998641	blue
Niben101Scf00225g06013	0.99546	blue
Niben101Scf00225g06014	0.987968	blue
Niben101Scf00231g07029	0.989551	blue
Niben101Scf00262g01003	0.995964	blue
Niben101Scf00264g02002	0.982865	blue
Niben101Scf00282g02006	0.99554	blue
Niben101Scf00308g01003	0.994558	blue
Niben101Scf00317g09001	0.996335	blue
Niben101Scf00339g00001	0.990563	blue
Niben101Scf00369g02005	0.99793	blue
Niben101Scf00369g21005	0.967886	blue
Niben101Scf00370g03034	0.965087	blue
Niben101Scf00381g06004	0.942506	blue
Niben101Scf00428g09005	0.984648	blue
Niben101Scf00439g06003	0.993992	blue
Niben101Scf00449g06008	0.948706	blue
Niben101Scf00454g03001	0.998854	blue
Niben101Scf00454g04003	0.996964	blue
Niben101Scf00522g01017	0.915512	blue
Niben101Scf00573g00010	0.996013	blue
Niben101Scf00578g05003	0.999512	blue
Niben101Scf00578g05007	0.982174	blue
Niben101Scf00611g09003	0.960727	blue
Niben101Scf00644g00021	0.919025	blue
Niben101Scf00662g04008	0.91699	blue
Niben101Scf00715g09001	0.80444	blue
Niben101Scf00735g06023	0.99897	blue
Niben101Scf00745g02015	0.92915	blue
Niben101Scf00747g12035	0.94538	blue
Niben101Scf00779g06009	0.712257	blue
Niben101Scf00788g03015	0.979434	blue
Niben101Scf00788g03016	0.951371	blue
Niben101Scf00817g04005	0.918453	blue
Niben101Scf00862g00010	0.893476	blue
Niben101Scf00970g02006	0.980405	blue
Niben101Scf01013g01003	0.912648	blue
Niben101Scf01037g10003	0.915467	blue
Niben101Scf01109g03004	0.993112	blue
Niben101Scf01109g03005	0.997822	blue
Niben101Scf01119g03004	0.967263	blue
Niben101Scf01124g24003	0.859056	blue
Niben101Scf01128g00004	0.99917	blue
Niben101Scf01141g01001	0.998563	blue
Niben101Scf01141g04003	0.966266	blue
Niben101Scf01143g11007	0.855755	blue
Niben101Scf01154g18011	0.978956	blue
Niben101Scf01156g01015	0.984887	blue
Niben101Scf01182g05003	0.93061	blue
Niben101Scf01189g04025	0.996526	blue
Niben101Scf01212g03005	0.995185	blue
Niben101Scf01294g05002	0.953936	blue
Niben101Scf01297g04003	0.905178	blue
Niben101Scf01297g04006	0.86161	blue
Niben101Scf01326g07007	0.938684	blue
Niben101Scf01341g00002	0.987072	blue
Niben101Scf01372g09018	0.990261	blue
Niben101Scf01412g00018	0.984764	blue
Niben101Scf01417g05001	0.957969	blue
Niben101Scf01451g00002	0.982436	blue
Niben101Scf01475g00004	0.915859	blue
Niben101Scf01478g05006	0.825684	blue
Niben101Scf01524g00006	0.985423	blue
Niben101Scf01545g03002	0.991614	blue
Niben101Scf01574g09001	0.988543	blue
Niben101Scf01589g00002	0.992888	blue
Niben101Scf01612g03002	0.931197	blue
Niben101Scf01634g07030	0.966002	blue
Niben101Scf01639g04001	0.78731	blue
Niben101Scf01640g00002	0.964043	blue
Niben101Scf01640g03006	0.932147	blue
Niben101Scf01660g00007	0.800343	blue
Niben101Scf01660g02014	0.983328	blue
Niben101Scf01685g09002	0.991688	blue
Niben101Scf01697g18001	0.987952	blue
Niben101Scf01721g08007	0.998315	blue
Niben101Scf01739g08010	0.982926	blue
Niben101Scf01745g07025	0.995986	blue
Niben101Scf01750g15003	0.997186	blue
Niben101Scf01752g05003	0.997765	blue
Niben101Scf01777g02001	0.985752	blue
Niben101Scf01833g00002	0.902836	blue
Niben101Scf01856g02005	0.993311	blue
Niben101Scf01887g01001	0.994427	blue
Niben101Scf01899g02003	0.982065	blue
Niben101Scf01954g01001	0.827317	blue
Niben101Scf01961g02007	0.986127	blue
Niben101Scf01977g00001	0.995921	blue
Niben101Scf01998g03009	0.982608	blue
Niben101Scf02044g00010	0.987745	blue
Niben101Scf02085g12005	0.999793	blue
Niben101Scf02085g26009	0.924695	blue
Niben101Scf02093g00004	0.990958	blue
Niben101Scf02110g00011	0.905634	blue
Niben101Scf02145g09012	0.997787	blue
Niben101Scf02164g00002	0.965806	blue
Niben101Scf02170g02011	0.991375	blue
Niben101Scf02171g00008	0.938795	blue
Niben101Scf02195g01001	0.969526	blue
Niben101Scf02215g05009	0.995177	blue
Niben101Scf02228g02003	0.99283	blue
Niben101Scf02279g05002	0.981767	blue
Niben101Scf02286g01005	0.999168	blue
Niben101Scf02303g00022	0.990228	blue
Niben101Scf02325g03024	0.993598	blue
Niben101Scf02362g02014	0.964722	blue
Niben101Scf02370g02008	0.999257	blue
Niben101Scf02379g03014	0.951574	blue
Niben101Scf02398g02001	0.986628	blue
Niben101Scf02413g03022	0.996918	blue
Niben101Scf02430g03006	0.95496	blue
Niben101Scf02437g08005	0.908443	blue
Niben101Scf02513g00006	0.950387	blue
Niben101Scf02537g05004	0.992636	blue
Niben101Scf02537g05005	0.948756	blue
Niben101Scf02537g06002	0.920288	blue
Niben101Scf02537g06003	0.928455	blue
Niben101Scf02571g00002	0.886062	blue
Niben101Scf02613g03001	0.989351	blue
Niben101Scf02626g06001	0.985729	blue
Niben101Scf02626g08014	0.857215	blue
Niben101Scf02636g07002	0.99434	blue
Niben101Scf02732g00002	0.966854	blue
Niben101Scf02790g03007	0.970499	blue
Niben101Scf02816g01009	0.992114	blue
Niben101Scf02835g00007	0.92426	blue
Niben101Scf02838g07002	0.966159	blue
Niben101Scf02918g00003	0.836354	blue
Niben101Scf02945g01001	0.960063	blue
Niben101Scf02971g01006	0.989028	blue
Niben101Scf03009g03002	0.96043	blue
Niben101Scf03012g03021	0.975593	blue
Niben101Scf03028g01011	0.998802	blue
Niben101Scf03045g04008	0.959306	blue
Niben101Scf03062g02017	0.928966	blue
Niben101Scf03108g12002	0.955085	blue
Niben101Scf03147g09006	0.946375	blue
Niben101Scf03147g10010	0.996779	blue
Niben101Scf03170g03005	0.939824	blue
Niben101Scf03202g08006	0.983668	blue
Niben101Scf03202g12016	0.909463	blue
Niben101Scf03238g00012	0.973865	blue
Niben101Scf03240g00007	0.967787	blue
Niben101Scf03240g01008	0.995537	blue
Niben101Scf03245g04004	0.995341	blue
Niben101Scf03245g06003	0.99507	blue
Niben101Scf03245g06006	0.989534	blue
Niben101Scf03280g00002	0.974423	blue
Niben101Scf03321g04008	0.992902	blue
Niben101Scf03348g00010	0.913864	blue
Niben101Scf03385g02011	0.87838	blue
Niben101Scf03468g03003	0.990877	blue
Niben101Scf03555g01001	0.973694	blue
Niben101Scf03570g02009	0.978703	blue
Niben101Scf03570g04002	0.974543	blue
Niben101Scf03638g02002	0.994745	blue
Niben101Scf03693g02001	0.977885	blue
Niben101Scf03817g16010	0.993651	blue
Niben101Scf03823g02037	0.953896	blue
Niben101Scf03850g03025	0.983294	blue
Niben101Scf03913g01045	0.977259	blue
Niben101Scf03930g03002	0.981592	blue
Niben101Scf04003g01002	0.993758	blue
Niben101Scf04036g04007	0.980355	blue
Niben101Scf04040g08010	0.908356	blue
Niben101Scf04040g09014	0.981223	blue
Niben101Scf04082g02014	0.893862	blue
Niben101Scf04091g00013	0.993476	blue
Niben101Scf04099g08003	0.966549	blue
Niben101Scf04109g06004	0.977399	blue
Niben101Scf04117g05009	0.919611	blue
Niben101Scf04133g02009	0.951952	blue
Niben101Scf04197g00003	0.938665	blue
Niben101Scf04217g07002	0.998652	blue
Niben101Scf04283g02008	0.934284	blue
Niben101Scf04287g03001	0.956295	blue
Niben101Scf04392g03001	0.999736	blue
Niben101Scf04400g01012	0.932328	blue
Niben101Scf04401g06001	0.993655	blue
Niben101Scf04410g09016	0.969483	blue
Niben101Scf04418g08005	0.961108	blue
Niben101Scf04448g02011	0.998236	blue
Niben101Scf04490g00001	0.96962	blue
Niben101Scf04537g01009	0.942157	blue
Niben101Scf04732g00001	0.979946	blue
Niben101Scf04813g01008	0.923687	blue
Niben101Scf04841g00035	0.987134	blue
Niben101Scf04844g00001	0.921092	blue
Niben101Scf04887g00006	0.966539	blue
Niben101Scf04907g01013	0.988097	blue
Niben101Scf04911g00004	0.995677	blue
Niben101Scf04922g00002	0.943267	blue
Niben101Scf04939g01005	0.98442	blue
Niben101Scf04973g02010	0.986604	blue
Niben101Scf04989g03001	0.719411	blue
Niben101Scf04993g05001	0.99627	blue
Niben101Scf05011g00001	0.985703	blue
Niben101Scf05029g02016	0.996361	blue
Niben101Scf05056g00004	0.995831	blue
Niben101Scf05060g07008	0.980505	blue
Niben101Scf05110g00007	0.997646	blue
Niben101Scf05112g00010	0.974326	blue
Niben101Scf05137g01028	0.991273	blue
Niben101Scf05149g00005	0.983263	blue
Niben101Scf05149g00006	0.976551	blue
Niben101Scf05189g00002	0.997796	blue
Niben101Scf05245g02003	0.976007	blue
Niben101Scf05298g00004	0.998897	blue
Niben101Scf05301g04003	0.993533	blue
Niben101Scf05363g02005	0.972365	blue
Niben101Scf05368g06016	0.988609	blue
Niben101Scf05404g00002	0.997315	blue
Niben101Scf05430g00010	0.944573	blue
Niben101Scf05437g04015	0.965604	blue
Niben101Scf05453g00018	0.984824	blue
Niben101Scf05506g06005	0.999613	blue
Niben101Scf05522g00002	0.991446	blue
Niben101Scf05553g06001	0.952669	blue
Niben101Scf05678g01001	0.968109	blue
Niben101Scf05694g00009	0.989842	blue
Niben101Scf05702g02010	0.998197	blue
Niben101Scf05749g02030	0.98439	blue
Niben101Scf05756g00005	0.960835	blue
Niben101Scf05767g04010	0.883722	blue
Niben101Scf05767g07012	0.997098	blue
Niben101Scf05799g01007	0.963651	blue
Niben101Scf05862g00004	0.983524	blue
Niben101Scf05862g00005	0.986391	blue
Niben101Scf05862g00006	0.988979	blue
Niben101Scf05880g02003	0.994853	blue
Niben101Scf05883g00008	0.904381	blue
Niben101Scf05901g01008	0.99082	blue
Niben101Scf06091g04005	0.967337	blue
Niben101Scf06200g00001	0.982533	blue
Niben101Scf06248g00012	0.995142	blue
Niben101Scf06280g01016	0.981127	blue
Niben101Scf06283g00001	0.974483	blue
Niben101Scf06332g02001	0.988601	blue
Niben101Scf06344g00005	0.987294	blue
Niben101Scf06467g01001	0.970845	blue
Niben101Scf06467g01006	0.970848	blue
Niben101Scf06556g10007	0.992318	blue
Niben101Scf06650g03009	0.967613	blue
Niben101Scf06684g01005	0.986696	blue
Niben101Scf06823g02001	0.993614	blue
Niben101Scf06976g06002	0.921781	blue
Niben101Scf06977g00014	0.978265	blue
Niben101Scf06996g02005	0.977651	blue
Niben101Scf07019g02006	0.957799	blue
Niben101Scf07042g01006	0.986452	blue
Niben101Scf07060g03009	0.998237	blue
Niben101Scf07070g01015	0.975758	blue
Niben101Scf07127g00003	0.985935	blue
Niben101Scf07242g01001	0.930733	blue
Niben101Scf07244g00001	0.997319	blue
Niben101Scf07244g01004	0.99893	blue
Niben101Scf07275g02012	0.994431	blue
Niben101Scf07391g03014	0.963418	blue
Niben101Scf07391g04028	0.990471	blue
Niben101Scf07395g00029	0.979555	blue
Niben101Scf07451g00013	0.98374	blue
Niben101Scf07554g01010	0.967705	blue
Niben101Scf07580g00006	0.931769	blue
Niben101Scf07586g01001	0.933598	blue
Niben101Scf07743g00005	0.769448	blue
Niben101Scf07880g02009	0.982092	blue
Niben101Scf08020g06001	0.989318	blue
Niben101Scf08030g04001	0.997682	blue
Niben101Scf08034g01002	0.969537	blue
Niben101Scf08035g00009	0.997008	blue
Niben101Scf08039g01005	0.7783	blue
Niben101Scf08041g02010	0.932083	blue
Niben101Scf08111g02011	0.908974	blue
Niben101Scf08130g00014	0.985321	blue
Niben101Scf08150g00004	0.998869	blue
Niben101Scf08196g01001	0.945991	blue
Niben101Scf08211g03014	0.998797	blue
Niben101Scf08249g02004	0.955447	blue
Niben101Scf08321g01005	0.981244	blue
Niben101Scf08330g01006	0.988733	blue
Niben101Scf08357g01008	0.879736	blue
Niben101Scf08510g01006	0.986299	blue
Niben101Scf08546g03002	0.99952	blue
Niben101Scf08546g05002	0.983225	blue
Niben101Scf08546g05004	0.991371	blue
Niben101Scf08566g00007	0.91167	blue
Niben101Scf08633g00005	0.961872	blue
Niben101Scf08724g00012	0.994223	blue
Niben101Scf08804g02014	0.993974	blue
Niben101Scf08806g02004	0.99924	blue
Niben101Scf09225g04002	0.926704	blue
Niben101Scf09282g00004	0.998865	blue
Niben101Scf09368g06007	0.947662	blue
Niben101Scf09454g00001	0.990975	blue
Niben101Scf09512g00004	0.98942	blue
Niben101Scf09577g01001	0.989308	blue
Niben101Scf09597g03004	0.852688	blue
Niben101Scf09604g01004	0.993559	blue
Niben101Scf09928g01011	0.980047	blue
Niben101Scf09928g01023	0.994868	blue
Niben101Scf10053g00011	0.992025	blue
Niben101Scf10224g00005	0.999656	blue
Niben101Scf10306g00005	0.908522	blue
Niben101Scf10322g01017	0.956578	blue
Niben101Scf10336g01001	0.971176	blue
Niben101Scf10384g02003	0.95364	blue
Niben101Scf10855g08005	0.997992	blue
Niben101Scf11105g01005	0.993337	blue
Niben101Scf11215g00029	0.992017	blue
Niben101Scf11232g01012	0.965575	blue
Niben101Scf11325g00011	0.971054	blue
Niben101Scf11410g00002	0.966614	blue
Niben101Scf11689g03008	0.966853	blue
Niben101Scf12076g00017	0.996293	blue
Niben101Scf12210g07001	0.99574	blue
Niben101Scf12308g00003	0.970624	blue
Niben101Scf12308g00005	0.998134	blue
Niben101Scf12308g00011	0.975172	blue
Niben101Scf12672g00005	0.990233	blue
Niben101Scf12797g00017	0.998438	blue
Niben101Scf13289g00008	0.991601	blue
Niben101Scf13779g00003	0.999149	blue
Niben101Scf13842g01001	0.954612	blue
Niben101Scf14069g00002	0.935765	blue
Niben101Scf14144g01017	0.995461	blue
Niben101Scf14299g00002	0.978282	blue
Niben101Scf14662g01006	0.997877	blue
Niben101Scf14883g01004	0.98242	blue
Niben101Scf15156g01002	0.933232	blue
Niben101Scf15187g00004	0.902504	blue
Niben101Scf15373g00007	0.997726	blue
Niben101Scf15437g02005	0.892247	blue
Niben101Scf15437g02006	0.90075	blue
Niben101Scf15568g00021	0.957436	blue
Niben101Scf16007g00010	0.993564	blue
Niben101Scf16007g00011	0.997995	blue
Niben101Scf16105g00001	0.999934	blue
Niben101Scf16197g03005	0.993709	blue
Niben101Scf16244g00001	0.985429	blue
Niben101Scf17594g00006	0.989519	blue
Niben101Scf17795g00001	0.988177	blue
Niben101Scf19216g00006	0.956613	blue
Niben101Scf19533g00007	0.982514	blue
Niben101Scf19766g00001	0.964994	blue
Niben101Scf19911g00001	0.999691	blue
Niben101Scf23241g00003	0.997601	blue
Niben101Scf23632g00002	0.971051	blue
Niben101Scf24679g00011	0.984721	blue
Niben101Scf27240g00004	0.845707	blue
Niben101Scf27377g00004	0.890463	blue
Niben101Scf28763g00006	0.980493	blue
Niben101Scf34484g00001	0.996657	blue
Niben101Scf39444g00001	0.882157	blue
Nicotiana_benthamiana_newGene_10413	0.944777	blue
Nicotiana_benthamiana_newGene_10969	0.873528	blue
Nicotiana_benthamiana_newGene_11893	0.997013	blue
Nicotiana_benthamiana_newGene_12199	0.963436	blue
Nicotiana_benthamiana_newGene_12427	0.974136	blue
Nicotiana_benthamiana_newGene_12472	0.985482	blue
Nicotiana_benthamiana_newGene_12554	0.877454	blue
Nicotiana_benthamiana_newGene_12627	0.989204	blue
Nicotiana_benthamiana_newGene_13260	0.991549	blue
Nicotiana_benthamiana_newGene_13319	0.892923	blue
Nicotiana_benthamiana_newGene_14543	0.964047	blue
Nicotiana_benthamiana_newGene_15954	0.999802	blue
Nicotiana_benthamiana_newGene_1603	0.954271	blue
Nicotiana_benthamiana_newGene_16640	0.975215	blue
Nicotiana_benthamiana_newGene_1723	0.927136	blue
Nicotiana_benthamiana_newGene_18240	0.994406	blue
Nicotiana_benthamiana_newGene_2516	0.9591	blue
Nicotiana_benthamiana_newGene_3365	0.982803	blue
Nicotiana_benthamiana_newGene_4446	0.985057	blue
Nicotiana_benthamiana_newGene_630	0.995812	blue
Nicotiana_benthamiana_newGene_6682	0.993917	blue
Nicotiana_benthamiana_newGene_7035	0.963394	blue
Nicotiana_benthamiana_newGene_8163	0.952276	blue
Nicotiana_benthamiana_newGene_8217	0.933051	blue
Nicotiana_benthamiana_newGene_8826	0.805255	blue
Nicotiana_benthamiana_newGene_9220	0.953377	blue
Niben101Ctg09403g00001	0.925032	brown
Niben101Ctg13666g00001	0.78051	brown
Niben101Ctg14566g00003	0.9803	brown
Niben101Ctg16216g00002	0.988063	brown
Niben101Scf00013g01005	0.983046	brown
Niben101Scf00046g08005	0.989798	brown
Niben101Scf00058g08006	0.975173	brown
Niben101Scf00131g01018	0.991633	brown
Niben101Scf00138g03003	0.975141	brown
Niben101Scf00149g02017	0.995509	brown
Niben101Scf00219g07016	0.942836	brown
Niben101Scf00288g18013	0.988658	brown
Niben101Scf00317g00008	0.974527	brown
Niben101Scf00321g05001	0.997746	brown
Niben101Scf00327g00001	0.971022	brown
Niben101Scf00397g06001	0.981875	brown
Niben101Scf00398g00002	0.998144	brown
Niben101Scf00422g01021	0.987035	brown
Niben101Scf00425g03002	0.997808	brown
Niben101Scf00436g05003	0.981174	brown
Niben101Scf00458g04002	0.995118	brown
Niben101Scf00536g15017	0.876624	brown
Niben101Scf00571g05009	0.991367	brown
Niben101Scf00573g01003	0.994158	brown
Niben101Scf00574g09011	0.979804	brown
Niben101Scf00593g03002	0.972832	brown
Niben101Scf00646g01008	0.981232	brown
Niben101Scf00663g02007	0.993676	brown
Niben101Scf00815g00012	0.97311	brown
Niben101Scf00823g01006	0.987612	brown
Niben101Scf00833g04004	0.975814	brown
Niben101Scf00870g03002	0.984677	brown
Niben101Scf00870g11001	0.988562	brown
Niben101Scf00887g01007	0.999444	brown
Niben101Scf00890g01025	0.999192	brown
Niben101Scf00893g01029	0.972371	brown
Niben101Scf00906g00001	0.997409	brown
Niben101Scf00906g00010	0.998363	brown
Niben101Scf00978g00001	0.960835	brown
Niben101Scf00981g03004	0.984835	brown
Niben101Scf01020g02008	0.984138	brown
Niben101Scf01028g01007	0.999316	brown
Niben101Scf01063g05019	0.972176	brown
Niben101Scf01109g00005	0.976797	brown
Niben101Scf01181g01007	0.987353	brown
Niben101Scf01181g04007	0.995228	brown
Niben101Scf01184g17001	0.994478	brown
Niben101Scf01196g00003	0.984917	brown
Niben101Scf01255g00001	0.942383	brown
Niben101Scf01266g01003	0.92694	brown
Niben101Scf01269g03002	0.992583	brown
Niben101Scf01397g00021	0.984375	brown
Niben101Scf01442g01009	0.947012	brown
Niben101Scf01444g00001	0.988267	brown
Niben101Scf01460g04025	0.967227	brown
Niben101Scf01482g01007	0.974317	brown
Niben101Scf01494g04009	0.983239	brown
Niben101Scf01549g00008	0.997026	brown
Niben101Scf01596g06002	0.986972	brown
Niben101Scf01599g03021	0.994982	brown
Niben101Scf01602g02002	0.994451	brown
Niben101Scf01642g01014	0.987724	brown
Niben101Scf01688g02005	0.990042	brown
Niben101Scf01696g06050	0.995142	brown
Niben101Scf01704g00002	0.982538	brown
Niben101Scf01789g02015	0.993437	brown
Niben101Scf01796g01005	0.999062	brown
Niben101Scf01858g01007	0.967947	brown
Niben101Scf01905g00003	0.998944	brown
Niben101Scf01965g00011	0.971477	brown
Niben101Scf01978g01006	0.960095	brown
Niben101Scf02059g02014	0.992793	brown
Niben101Scf02060g01002	0.976218	brown
Niben101Scf02072g01013	0.931622	brown
Niben101Scf02111g11033	0.974583	brown
Niben101Scf02199g01010	0.978459	brown
Niben101Scf02207g12004	0.951841	brown
Niben101Scf02252g01032	0.974479	brown
Niben101Scf02348g05008	0.990211	brown
Niben101Scf02385g00001	0.92669	brown
Niben101Scf02420g03014	0.975105	brown
Niben101Scf02475g10005	0.997423	brown
Niben101Scf02503g00004	0.99103	brown
Niben101Scf02522g01005	0.981622	brown
Niben101Scf02636g05003	0.95527	brown
Niben101Scf02699g00016	0.983985	brown
Niben101Scf02705g02021	0.993363	brown
Niben101Scf02712g00001	0.994783	brown
Niben101Scf02719g00006	0.994851	brown
Niben101Scf02750g03003	0.992285	brown
Niben101Scf02771g01007	0.961088	brown
Niben101Scf02814g02014	0.992975	brown
Niben101Scf02847g00005	0.997876	brown
Niben101Scf02852g00013	0.981958	brown
Niben101Scf02877g02005	0.9573	brown
Niben101Scf02915g01001	1	brown
Niben101Scf02942g00020	0.995086	brown
Niben101Scf02971g05019	0.971226	brown
Niben101Scf03000g01002	0.995486	brown
Niben101Scf03004g02017	0.996684	brown
Niben101Scf03036g00006	0.997705	brown
Niben101Scf03052g00004	0.980804	brown
Niben101Scf03087g00002	0.980299	brown
Niben101Scf03111g01017	0.98744	brown
Niben101Scf03114g07015	0.977984	brown
Niben101Scf03147g02010	0.985209	brown
Niben101Scf03164g07006	0.989967	brown
Niben101Scf03197g06003	0.933784	brown
Niben101Scf03223g02002	0.986354	brown
Niben101Scf03250g01004	0.979479	brown
Niben101Scf03262g01002	0.966448	brown
Niben101Scf03300g02006	0.997665	brown
Niben101Scf03300g04003	0.995129	brown
Niben101Scf03300g04004	0.971842	brown
Niben101Scf03341g00002	0.972134	brown
Niben101Scf03412g03003	0.990286	brown
Niben101Scf03444g04026	0.98878	brown
Niben101Scf03548g02037	0.983837	brown
Niben101Scf03638g00009	0.988651	brown
Niben101Scf03732g01001	0.997172	brown
Niben101Scf03766g07024	0.982357	brown
Niben101Scf03816g02017	0.945031	brown
Niben101Scf03819g03027	0.989346	brown
Niben101Scf03930g02021	0.995939	brown
Niben101Scf04028g02018	0.978047	brown
Niben101Scf04044g22008	0.996695	brown
Niben101Scf04078g01006	0.999789	brown
Niben101Scf04096g01008	0.99162	brown
Niben101Scf04138g00005	0.998534	brown
Niben101Scf04141g01002	0.995765	brown
Niben101Scf04145g00026	0.980304	brown
Niben101Scf04198g07005	0.987767	brown
Niben101Scf04217g04003	0.951096	brown
Niben101Scf04350g03001	0.995221	brown
Niben101Scf04364g01003	0.948996	brown
Niben101Scf04364g01014	0.9606	brown
Niben101Scf04375g08002	0.99856	brown
Niben101Scf04456g03003	0.988117	brown
Niben101Scf04489g00003	0.996437	brown
Niben101Scf04570g06005	0.982255	brown
Niben101Scf04632g09013	0.99925	brown
Niben101Scf04664g01015	0.985241	brown
Niben101Scf04692g01002	0.985744	brown
Niben101Scf04731g09009	0.998344	brown
Niben101Scf04772g00008	0.98571	brown
Niben101Scf04869g03002	0.960697	brown
Niben101Scf04886g05003	0.980888	brown
Niben101Scf04921g00005	0.978985	brown
Niben101Scf05047g03008	0.976863	brown
Niben101Scf05057g06008	0.982471	brown
Niben101Scf05118g06012	0.991939	brown
Niben101Scf05146g06007	0.996052	brown
Niben101Scf05166g05002	0.98808	brown
Niben101Scf05269g02015	0.98426	brown
Niben101Scf05341g03002	0.988698	brown
Niben101Scf05387g02004	0.985269	brown
Niben101Scf05395g04016	0.997534	brown
Niben101Scf05449g03005	0.965891	brown
Niben101Scf05467g04002	0.983279	brown
Niben101Scf05528g01009	0.999798	brown
Niben101Scf05534g01008	0.997615	brown
Niben101Scf05654g00005	0.956001	brown
Niben101Scf05676g06014	0.976438	brown
Niben101Scf05712g02022	0.929018	brown
Niben101Scf05821g02010	0.995757	brown
Niben101Scf05931g00003	0.978477	brown
Niben101Scf05957g00001	0.938587	brown
Niben101Scf05969g01002	0.996046	brown
Niben101Scf05989g00012	0.987423	brown
Niben101Scf06061g00014	0.991882	brown
Niben101Scf06151g03007	0.98084	brown
Niben101Scf06156g02003	0.995269	brown
Niben101Scf06369g03007	0.993994	brown
Niben101Scf06556g07002	0.983105	brown
Niben101Scf06641g01005	0.985177	brown
Niben101Scf06763g00018	0.992018	brown
Niben101Scf06771g00004	0.996148	brown
Niben101Scf06772g01006	0.996318	brown
Niben101Scf06799g01001	0.994112	brown
Niben101Scf06909g04006	0.973636	brown
Niben101Scf06912g01020	0.985011	brown
Niben101Scf06916g01011	0.995512	brown
Niben101Scf06966g02010	0.979281	brown
Niben101Scf07026g00016	0.974978	brown
Niben101Scf07089g02011	0.921377	brown
Niben101Scf07590g04001	0.98995	brown
Niben101Scf07681g02008	0.904307	brown
Niben101Scf07829g00003	0.96611	brown
Niben101Scf07833g00010	0.965178	brown
Niben101Scf07854g01011	0.985561	brown
Niben101Scf08041g02014	0.997979	brown
Niben101Scf08137g02022	0.998857	brown
Niben101Scf08149g00015	0.999402	brown
Niben101Scf08149g01008	0.986169	brown
Niben101Scf08272g00021	0.973439	brown
Niben101Scf08351g04011	0.977942	brown
Niben101Scf08445g01003	0.995736	brown
Niben101Scf08455g00002	0.998585	brown
Niben101Scf08652g01013	0.914631	brown
Niben101Scf08675g00006	0.996674	brown
Niben101Scf08718g00002	0.988791	brown
Niben101Scf08812g00009	0.982244	brown
Niben101Scf08855g02013	0.996618	brown
Niben101Scf09260g03002	0.996776	brown
Niben101Scf09417g00002	0.979582	brown
Niben101Scf09458g00004	0.981333	brown
Niben101Scf09467g00005	0.998635	brown
Niben101Scf09516g00022	0.997231	brown
Niben101Scf09997g00023	0.991905	brown
Niben101Scf10132g00017	0.991391	brown
Niben101Scf10152g01008	0.992614	brown
Niben101Scf10381g00006	0.97733	brown
Niben101Scf10409g02009	0.996203	brown
Niben101Scf10438g00008	0.977066	brown
Niben101Scf10575g00011	0.975576	brown
Niben101Scf10927g00020	0.963451	brown
Niben101Scf10997g02004	0.999037	brown
Niben101Scf11120g00009	0.994236	brown
Niben101Scf11341g00025	0.954997	brown
Niben101Scf11399g00011	0.995771	brown
Niben101Scf11604g00006	0.974966	brown
Niben101Scf11706g00008	0.982375	brown
Niben101Scf11774g01006	0.978637	brown
Niben101Scf12045g06025	0.999511	brown
Niben101Scf12102g01006	0.948488	brown
Niben101Scf12216g00004	0.971621	brown
Niben101Scf12266g09001	0.983847	brown
Niben101Scf12443g02009	0.977248	brown
Niben101Scf12725g00031	0.970457	brown
Niben101Scf13118g00003	0.984486	brown
Niben101Scf13289g02018	0.98766	brown
Niben101Scf13308g00004	0.995659	brown
Niben101Scf13577g00007	0.94282	brown
Niben101Scf13644g00002	0.977641	brown
Niben101Scf13762g01047	0.989078	brown
Niben101Scf13776g01016	0.99812	brown
Niben101Scf14136g00007	0.994261	brown
Niben101Scf14697g01004	0.985525	brown
Niben101Scf15367g00001	0.997313	brown
Niben101Scf15532g01011	0.999256	brown
Niben101Scf16114g01003	0.98533	brown
Niben101Scf17422g00019	0.973969	brown
Niben101Scf17422g00020	0.990781	brown
Niben101Scf19271g00007	0.990151	brown
Niben101Scf22058g00004	0.987607	brown
Niben101Scf23113g00026	0.890209	brown
Niben101Scf28115g00001	0.969142	brown
Niben101Scf29047g00008	0.919079	brown
Nicotiana_benthamiana_newGene_10225	0.9873	brown
Nicotiana_benthamiana_newGene_10645	0.980048	brown
Nicotiana_benthamiana_newGene_10764	0.945525	brown
Nicotiana_benthamiana_newGene_11069	0.984467	brown
Nicotiana_benthamiana_newGene_12179	0.97984	brown
Nicotiana_benthamiana_newGene_12279	0.987438	brown
Nicotiana_benthamiana_newGene_12667	0.97979	brown
Nicotiana_benthamiana_newGene_13264	0.978455	brown
Nicotiana_benthamiana_newGene_13967	0.994636	brown
Nicotiana_benthamiana_newGene_1473	0.9814	brown
Nicotiana_benthamiana_newGene_14898	0.9978	brown
Nicotiana_benthamiana_newGene_14915	0.942011	brown
Nicotiana_benthamiana_newGene_15633	0.989833	brown
Nicotiana_benthamiana_newGene_15990	0.991801	brown
Nicotiana_benthamiana_newGene_16526	0.930504	brown
Nicotiana_benthamiana_newGene_17917	0.985778	brown
Nicotiana_benthamiana_newGene_17957	0.969674	brown
Nicotiana_benthamiana_newGene_18053	0.974099	brown
Nicotiana_benthamiana_newGene_1836	0.995126	brown
Nicotiana_benthamiana_newGene_1905	0.991603	brown
Nicotiana_benthamiana_newGene_2042	0.976642	brown
Nicotiana_benthamiana_newGene_217	0.999044	brown
Nicotiana_benthamiana_newGene_2249	0.993772	brown
Nicotiana_benthamiana_newGene_2544	0.939522	brown
Nicotiana_benthamiana_newGene_3219	0.95583	brown
Nicotiana_benthamiana_newGene_3273	0.941264	brown
Nicotiana_benthamiana_newGene_5719	0.972142	brown
Nicotiana_benthamiana_newGene_6615	0.998386	brown
Nicotiana_benthamiana_newGene_6852	0.995599	brown
Nicotiana_benthamiana_newGene_7280	0.987024	brown
Nicotiana_benthamiana_newGene_7312	0.987682	brown
Nicotiana_benthamiana_newGene_7567	0.97095	brown
Nicotiana_benthamiana_newGene_7666	0.990901	brown
Nicotiana_benthamiana_newGene_9228	0.994399	brown
Nicotiana_benthamiana_newGene_9730	0.990952	brown
Niben101Ctg10016g00001	0.98497	turquoise
Niben101Ctg12072g00001	0.995913	turquoise
Niben101Ctg12626g00002	0.998584	turquoise
Niben101Ctg13703g00001	0.999902	turquoise
Niben101Ctg13781g00001	0.985918	turquoise
Niben101Ctg14751g00004	0.984444	turquoise
Niben101Ctg15114g00004	0.991771	turquoise
Niben101Ctg15201g00002	0.986823	turquoise
Niben101Ctg15717g00003	0.98742	turquoise
Niben101Ctg16278g00003	0.998493	turquoise
Niben101Ctg16445g00004	0.987015	turquoise
Niben101Scf00005g01008	0.919805	turquoise
Niben101Scf00021g01016	0.98736	turquoise
Niben101Scf00037g02016	0.967321	turquoise
Niben101Scf00046g02008	0.963212	turquoise
Niben101Scf00059g03006	0.994217	turquoise
Niben101Scf00062g01025	0.980717	turquoise
Niben101Scf00063g08002	0.944092	turquoise
Niben101Scf00063g10001	0.991441	turquoise
Niben101Scf00069g02007	0.991059	turquoise
Niben101Scf00090g08011	0.976153	turquoise
Niben101Scf00109g05018	0.973718	turquoise
Niben101Scf00119g01002	0.988777	turquoise
Niben101Scf00123g04002	0.99816	turquoise
Niben101Scf00123g06029	0.991839	turquoise
Niben101Scf00127g00008	0.938826	turquoise
Niben101Scf00132g03003	0.985355	turquoise
Niben101Scf00146g00008	0.9872	turquoise
Niben101Scf00152g20002	0.998744	turquoise
Niben101Scf00153g00020	0.99349	turquoise
Niben101Scf00163g00010	0.990007	turquoise
Niben101Scf00163g08018	0.97302	turquoise
Niben101Scf00165g01004	0.998942	turquoise
Niben101Scf00167g01003	0.950226	turquoise
Niben101Scf00180g04010	0.997164	turquoise
Niben101Scf00214g00007	0.995258	turquoise
Niben101Scf00244g01013	0.977847	turquoise
Niben101Scf00245g05007	0.997466	turquoise
Niben101Scf00254g07001	0.990952	turquoise
Niben101Scf00271g05016	0.964216	turquoise
Niben101Scf00286g05014	0.999837	turquoise
Niben101Scf00293g04005	0.982235	turquoise
Niben101Scf00308g01002	0.984125	turquoise
Niben101Scf00317g01004	0.973411	turquoise
Niben101Scf00332g04003	0.998402	turquoise
Niben101Scf00338g10009	0.997356	turquoise
Niben101Scf00347g00011	0.967891	turquoise
Niben101Scf00349g01014	0.986788	turquoise
Niben101Scf00367g08003	0.989003	turquoise
Niben101Scf00369g05011	0.989722	turquoise
Niben101Scf00369g21009	0.987207	turquoise
Niben101Scf00383g03001	0.916977	turquoise
Niben101Scf00410g01018	0.815306	turquoise
Niben101Scf00417g00008	0.996953	turquoise
Niben101Scf00418g02008	0.968396	turquoise
Niben101Scf00421g01025	0.99608	turquoise
Niben101Scf00432g02007	0.991397	turquoise
Niben101Scf00435g01006	0.99457	turquoise
Niben101Scf00436g00003	0.972669	turquoise
Niben101Scf00436g04003	0.979855	turquoise
Niben101Scf00456g00010	0.986561	turquoise
Niben101Scf00472g08006	0.995003	turquoise
Niben101Scf00474g11008	0.976695	turquoise
Niben101Scf00482g07005	0.865909	turquoise
Niben101Scf00536g04007	0.965407	turquoise
Niben101Scf00537g02021	0.990135	turquoise
Niben101Scf00537g02022	0.970629	turquoise
Niben101Scf00539g04003	0.938832	turquoise
Niben101Scf00551g00006	0.99568	turquoise
Niben101Scf00551g04013	0.966251	turquoise
Niben101Scf00577g09001	0.975221	turquoise
Niben101Scf00593g04019	0.952079	turquoise
Niben101Scf00616g02014	0.976492	turquoise
Niben101Scf00622g00006	0.954099	turquoise
Niben101Scf00637g04001	0.955098	turquoise
Niben101Scf00640g04021	0.9974	turquoise
Niben101Scf00652g01007	0.951132	turquoise
Niben101Scf00661g00002	0.945604	turquoise
Niben101Scf00674g00009	0.963462	turquoise
Niben101Scf00705g05011	0.99851	turquoise
Niben101Scf00710g00005	0.992614	turquoise
Niben101Scf00712g16002	0.940032	turquoise
Niben101Scf00719g00004	0.99848	turquoise
Niben101Scf00739g01009	0.98201	turquoise
Niben101Scf00739g04029	0.91453	turquoise
Niben101Scf00757g01001	0.983641	turquoise
Niben101Scf00757g05003	0.947211	turquoise
Niben101Scf00781g00004	0.988378	turquoise
Niben101Scf00801g03002	0.991751	turquoise
Niben101Scf00824g00002	0.987686	turquoise
Niben101Scf00831g02021	0.996346	turquoise
Niben101Scf00867g00001	0.993238	turquoise
Niben101Scf00872g00005	0.993766	turquoise
Niben101Scf00876g02002	0.998188	turquoise
Niben101Scf00879g03005	0.810947	turquoise
Niben101Scf00879g10002	0.973517	turquoise
Niben101Scf00894g03001	0.998554	turquoise
Niben101Scf00905g13001	0.973042	turquoise
Niben101Scf00911g01004	0.966176	turquoise
Niben101Scf00941g02003	0.999244	turquoise
Niben101Scf00944g02005	0.999997	turquoise
Niben101Scf00952g03006	0.94975	turquoise
Niben101Scf00953g05005	0.834436	turquoise
Niben101Scf00960g11004	0.942067	turquoise
Niben101Scf00974g00003	0.935497	turquoise
Niben101Scf00974g01017	0.926323	turquoise
Niben101Scf00974g01018	0.990868	turquoise
Niben101Scf00974g02010	0.981302	turquoise
Niben101Scf00984g09008	0.924442	turquoise
Niben101Scf00994g07007	0.991956	turquoise
Niben101Scf00996g02002	0.968643	turquoise
Niben101Scf00996g02009	0.983653	turquoise
Niben101Scf01006g03016	0.991096	turquoise
Niben101Scf01018g02004	0.998524	turquoise
Niben101Scf01027g00003	0.909389	turquoise
Niben101Scf01037g09001	0.987212	turquoise
Niben101Scf01054g02001	0.998952	turquoise
Niben101Scf01061g08025	0.984083	turquoise
Niben101Scf01071g03021	0.926391	turquoise
Niben101Scf01073g04022	0.972017	turquoise
Niben101Scf01125g01006	0.977995	turquoise
Niben101Scf01131g00004	0.998706	turquoise
Niben101Scf01143g03005	0.991232	turquoise
Niben101Scf01145g03002	0.972349	turquoise
Niben101Scf01146g12006	0.855232	turquoise
Niben101Scf01146g13015	0.951089	turquoise
Niben101Scf01150g03001	0.949395	turquoise
Niben101Scf01154g17005	0.962623	turquoise
Niben101Scf01166g07001	0.997375	turquoise
Niben101Scf01182g06005	0.996696	turquoise
Niben101Scf01188g10004	0.977913	turquoise
Niben101Scf01189g03003	0.964689	turquoise
Niben101Scf01191g02010	0.993867	turquoise
Niben101Scf01192g00009	0.985727	turquoise
Niben101Scf01212g02005	0.991462	turquoise
Niben101Scf01220g02011	0.959947	turquoise
Niben101Scf01221g00001	0.998862	turquoise
Niben101Scf01228g04007	0.992649	turquoise
Niben101Scf01235g00012	0.965861	turquoise
Niben101Scf01236g00015	0.938416	turquoise
Niben101Scf01241g02002	0.998269	turquoise
Niben101Scf01258g02001	0.998337	turquoise
Niben101Scf01272g01010	0.981299	turquoise
Niben101Scf01276g05011	0.958353	turquoise
Niben101Scf01281g02006	0.904887	turquoise
Niben101Scf01297g01011	0.967052	turquoise
Niben101Scf01304g13004	0.987991	turquoise
Niben101Scf01320g03008	0.986236	turquoise
Niben101Scf01326g05006	0.990662	turquoise
Niben101Scf01326g05008	0.989159	turquoise
Niben101Scf01330g02004	0.985824	turquoise
Niben101Scf01341g03003	0.966906	turquoise
Niben101Scf01343g00015	0.941745	turquoise
Niben101Scf01372g05004	0.976424	turquoise
Niben101Scf01374g07001	0.980959	turquoise
Niben101Scf01374g07002	0.947843	turquoise
Niben101Scf01374g15012	0.973162	turquoise
Niben101Scf01388g00004	0.9598	turquoise
Niben101Scf01392g03014	0.97997	turquoise
Niben101Scf01395g03005	0.95054	turquoise
Niben101Scf01396g05008	0.993416	turquoise
Niben101Scf01406g02006	0.975622	turquoise
Niben101Scf01409g07004	0.995218	turquoise
Niben101Scf01429g00010	0.977797	turquoise
Niben101Scf01436g00001	0.981847	turquoise
Niben101Scf01437g03008	0.988727	turquoise
Niben101Scf01438g04009	0.989202	turquoise
Niben101Scf01453g06003	0.988151	turquoise
Niben101Scf01463g07007	0.978998	turquoise
Niben101Scf01466g01006	0.9768	turquoise
Niben101Scf01478g00014	0.984305	turquoise
Niben101Scf01484g00008	0.994391	turquoise
Niben101Scf01494g04008	0.927525	turquoise
Niben101Scf01494g06003	0.960057	turquoise
Niben101Scf01500g01020	0.935757	turquoise
Niben101Scf01501g01001	0.988149	turquoise
Niben101Scf01520g01001	0.946606	turquoise
Niben101Scf01521g02013	0.991452	turquoise
Niben101Scf01534g00004	0.969472	turquoise
Niben101Scf01560g01005	0.995555	turquoise
Niben101Scf01569g04006	0.991777	turquoise
Niben101Scf01594g02015	0.954152	turquoise
Niben101Scf01596g01004	0.994971	turquoise
Niben101Scf01620g02009	0.974689	turquoise
Niben101Scf01623g01025	0.957704	turquoise
Niben101Scf01635g04003	0.999399	turquoise
Niben101Scf01638g00002	0.936012	turquoise
Niben101Scf01677g02003	0.984193	turquoise
Niben101Scf01685g12005	0.956164	turquoise
Niben101Scf01687g05002	0.964588	turquoise
Niben101Scf01689g01002	0.983718	turquoise
Niben101Scf01694g11001	0.999639	turquoise
Niben101Scf01716g00015	0.975279	turquoise
Niben101Scf01718g07005	0.984668	turquoise
Niben101Scf01721g07003	0.998284	turquoise
Niben101Scf01738g04010	0.989006	turquoise
Niben101Scf01750g15002	0.995327	turquoise
Niben101Scf01759g00001	0.958216	turquoise
Niben101Scf01764g02029	0.98661	turquoise
Niben101Scf01764g03018	0.990931	turquoise
Niben101Scf01774g07007	0.970011	turquoise
Niben101Scf01774g10021	0.997598	turquoise
Niben101Scf01775g03002	0.980482	turquoise
Niben101Scf01781g01002	0.993351	turquoise
Niben101Scf01782g05006	0.985542	turquoise
Niben101Scf01789g02042	0.946193	turquoise
Niben101Scf01791g00001	0.999752	turquoise
Niben101Scf01795g04036	0.940809	turquoise
Niben101Scf01799g00001	0.987014	turquoise
Niben101Scf01812g02026	0.896287	turquoise
Niben101Scf01817g02010	0.931017	turquoise
Niben101Scf01826g03013	0.959446	turquoise
Niben101Scf01847g05003	0.990022	turquoise
Niben101Scf01890g01005	0.999354	turquoise
Niben101Scf01922g10003	0.973875	turquoise
Niben101Scf01927g04007	0.995956	turquoise
Niben101Scf01927g09016	0.991886	turquoise
Niben101Scf01941g01008	0.972773	turquoise
Niben101Scf01948g01001	0.992824	turquoise
Niben101Scf01956g10006	0.986195	turquoise
Niben101Scf01976g00014	0.989764	turquoise
Niben101Scf01987g01006	0.961009	turquoise
Niben101Scf01994g02033	0.998255	turquoise
Niben101Scf01999g05003	0.985621	turquoise
Niben101Scf01999g05004	0.975077	turquoise
Niben101Scf02011g03011	0.996625	turquoise
Niben101Scf02015g01022	0.920526	turquoise
Niben101Scf02017g03004	0.998629	turquoise
Niben101Scf02029g01001	0.976526	turquoise
Niben101Scf02030g02012	0.978363	turquoise
Niben101Scf02041g02007	0.953563	turquoise
Niben101Scf02048g01009	0.971456	turquoise
Niben101Scf02056g02009	0.993039	turquoise
Niben101Scf02056g03001	0.968983	turquoise
Niben101Scf02073g08002	0.981685	turquoise
Niben101Scf02115g04004	0.962526	turquoise
Niben101Scf02124g01022	0.833966	turquoise
Niben101Scf02156g15009	0.915596	turquoise
Niben101Scf02159g01026	0.976427	turquoise
Niben101Scf02173g00001	0.938266	turquoise
Niben101Scf02182g03001	0.967516	turquoise
Niben101Scf02191g03003	0.992578	turquoise
Niben101Scf02216g02012	0.971415	turquoise
Niben101Scf02217g03003	0.954296	turquoise
Niben101Scf02222g02007	0.994127	turquoise
Niben101Scf02232g01002	0.986108	turquoise
Niben101Scf02237g09006	0.966694	turquoise
Niben101Scf02240g03014	0.986906	turquoise
Niben101Scf02253g01012	0.947381	turquoise
Niben101Scf02255g00004	0.9505	turquoise
Niben101Scf02279g08003	0.998883	turquoise
Niben101Scf02298g03009	0.977265	turquoise
Niben101Scf02348g00005	0.976453	turquoise
Niben101Scf02363g00026	0.970828	turquoise
Niben101Scf02387g03005	0.983336	turquoise
Niben101Scf02395g02002	0.936372	turquoise
Niben101Scf02399g01011	0.947986	turquoise
Niben101Scf02399g05001	0.977813	turquoise
Niben101Scf02413g02009	0.973601	turquoise
Niben101Scf02427g02013	0.982193	turquoise
Niben101Scf02428g01029	0.969824	turquoise
Niben101Scf02430g00010	0.980832	turquoise
Niben101Scf02433g06015	0.99901	turquoise
Niben101Scf02437g02020	0.939369	turquoise
Niben101Scf02438g02011	0.923121	turquoise
Niben101Scf02509g07005	0.978994	turquoise
Niben101Scf02510g04002	0.997648	turquoise
Niben101Scf02510g05023	0.9748	turquoise
Niben101Scf02513g09001	0.98377	turquoise
Niben101Scf02569g01002	0.990999	turquoise
Niben101Scf02575g02010	0.984578	turquoise
Niben101Scf02610g01003	0.993124	turquoise
Niben101Scf02621g04025	0.994236	turquoise
Niben101Scf02622g09004	0.969293	turquoise
Niben101Scf02632g03006	0.956326	turquoise
Niben101Scf02658g05007	0.838186	turquoise
Niben101Scf02662g00003	0.994368	turquoise
Niben101Scf02668g01013	0.99202	turquoise
Niben101Scf02693g02014	0.981776	turquoise
Niben101Scf02694g06012	0.981282	turquoise
Niben101Scf02725g03007	0.992887	turquoise
Niben101Scf02738g01016	0.99196	turquoise
Niben101Scf02751g07012	0.99402	turquoise
Niben101Scf02767g04005	0.965748	turquoise
Niben101Scf02794g01001	0.998186	turquoise
Niben101Scf02805g06002	0.939678	turquoise
Niben101Scf02819g02002	0.893916	turquoise
Niben101Scf02828g04005	0.941711	turquoise
Niben101Scf02831g08009	0.98838	turquoise
Niben101Scf02832g01021	0.922647	turquoise
Niben101Scf02835g00002	0.994788	turquoise
Niben101Scf02835g00003	0.835085	turquoise
Niben101Scf02853g06021	0.984998	turquoise
Niben101Scf02854g08010	0.975122	turquoise
Niben101Scf02854g09017	0.894976	turquoise
Niben101Scf02854g11002	0.987574	turquoise
Niben101Scf02857g01011	0.987981	turquoise
Niben101Scf02878g02004	0.976723	turquoise
Niben101Scf02886g02004	0.997933	turquoise
Niben101Scf02911g03012	0.987734	turquoise
Niben101Scf02946g01002	0.961122	turquoise
Niben101Scf02949g15002	0.98948	turquoise
Niben101Scf02982g03001	0.989869	turquoise
Niben101Scf02995g00003	0.958237	turquoise
Niben101Scf03020g00009	0.912114	turquoise
Niben101Scf03036g00005	0.936077	turquoise
Niben101Scf03048g04002	0.982214	turquoise
Niben101Scf03056g00006	0.999542	turquoise
Niben101Scf03080g02002	0.900007	turquoise
Niben101Scf03099g01003	0.985597	turquoise
Niben101Scf03111g00003	0.977775	turquoise
Niben101Scf03116g03004	0.994534	turquoise
Niben101Scf03116g04001	0.951696	turquoise
Niben101Scf03116g04006	0.950595	turquoise
Niben101Scf03128g07024	0.897299	turquoise
Niben101Scf03129g02008	0.992781	turquoise
Niben101Scf03135g00012	0.952495	turquoise
Niben101Scf03142g04006	0.999685	turquoise
Niben101Scf03150g00002	0.996996	turquoise
Niben101Scf03164g07004	0.973729	turquoise
Niben101Scf03169g04009	0.984817	turquoise
Niben101Scf03191g01013	0.976249	turquoise
Niben101Scf03203g02001	0.974687	turquoise
Niben101Scf03214g00006	0.996391	turquoise
Niben101Scf03214g01021	0.974864	turquoise
Niben101Scf03224g10009	0.987219	turquoise
Niben101Scf03266g05019	0.932165	turquoise
Niben101Scf03273g03022	0.976457	turquoise
Niben101Scf03280g00006	0.996475	turquoise
Niben101Scf03282g05005	0.997611	turquoise
Niben101Scf03287g00008	0.99664	turquoise
Niben101Scf03295g09001	0.994829	turquoise
Niben101Scf03325g01017	0.976993	turquoise
Niben101Scf03373g04012	0.986744	turquoise
Niben101Scf03392g09004	0.995847	turquoise
Niben101Scf03417g03001	0.97875	turquoise
Niben101Scf03419g15004	0.980747	turquoise
Niben101Scf03444g02004	0.991788	turquoise
Niben101Scf03446g12003	0.954102	turquoise
Niben101Scf03469g01004	0.970782	turquoise
Niben101Scf03488g09019	0.997553	turquoise
Niben101Scf03494g12028	0.985441	turquoise
Niben101Scf03507g05006	0.960427	turquoise
Niben101Scf03510g02005	0.993586	turquoise
Niben101Scf03545g00016	0.985445	turquoise
Niben101Scf03584g06021	0.994125	turquoise
Niben101Scf03595g10007	0.946729	turquoise
Niben101Scf03631g01001	0.962444	turquoise
Niben101Scf03647g03024	0.958775	turquoise
Niben101Scf03648g04010	0.95171	turquoise
Niben101Scf03652g03003	0.983785	turquoise
Niben101Scf03674g01005	0.980354	turquoise
Niben101Scf03674g01009	0.994885	turquoise
Niben101Scf03693g00005	0.933311	turquoise
Niben101Scf03713g00001	0.991194	turquoise
Niben101Scf03714g02005	0.901008	turquoise
Niben101Scf03729g02017	0.997299	turquoise
Niben101Scf03758g01001	0.985166	turquoise
Niben101Scf03766g01009	0.999738	turquoise
Niben101Scf03824g00002	0.936658	turquoise
Niben101Scf03853g03014	0.980669	turquoise
Niben101Scf03865g03002	0.978432	turquoise
Niben101Scf03886g04004	0.974764	turquoise
Niben101Scf03915g03003	0.994715	turquoise
Niben101Scf03930g00019	0.984312	turquoise
Niben101Scf03937g00009	0.970431	turquoise
Niben101Scf03951g02008	0.949331	turquoise
Niben101Scf03953g02018	0.996671	turquoise
Niben101Scf03969g04003	0.982675	turquoise
Niben101Scf03986g00002	0.949722	turquoise
Niben101Scf04011g00009	0.994765	turquoise
Niben101Scf04016g00009	0.986864	turquoise
Niben101Scf04044g22007	0.996	turquoise
Niben101Scf04046g00008	0.985655	turquoise
Niben101Scf04049g00024	0.999556	turquoise
Niben101Scf04093g00020	0.995293	turquoise
Niben101Scf04145g00013	0.989482	turquoise
Niben101Scf04181g00026	0.972055	turquoise
Niben101Scf04187g00028	0.998978	turquoise
Niben101Scf04212g00014	0.974516	turquoise
Niben101Scf04217g02012	0.911682	turquoise
Niben101Scf04223g00001	0.996036	turquoise
Niben101Scf04223g00008	0.989191	turquoise
Niben101Scf04240g02010	0.887811	turquoise
Niben101Scf04276g04020	0.986083	turquoise
Niben101Scf04287g00001	0.989662	turquoise
Niben101Scf04290g01001	0.995942	turquoise
Niben101Scf04323g04023	0.92892	turquoise
Niben101Scf04331g08004	0.983862	turquoise
Niben101Scf04347g01036	0.988944	turquoise
Niben101Scf04366g00005	0.988067	turquoise
Niben101Scf04368g00007	0.99891	turquoise
Niben101Scf04371g01006	0.964005	turquoise
Niben101Scf04371g04008	0.998116	turquoise
Niben101Scf04436g11006	0.966837	turquoise
Niben101Scf04455g00009	0.973932	turquoise
Niben101Scf04535g02019	0.999147	turquoise
Niben101Scf04549g08001	0.975183	turquoise
Niben101Scf04557g03013	0.969253	turquoise
Niben101Scf04570g06004	0.999887	turquoise
Niben101Scf04600g00007	0.988047	turquoise
Niben101Scf04623g01006	0.934295	turquoise
Niben101Scf04624g00012	0.946096	turquoise
Niben101Scf04627g05001	0.989861	turquoise
Niben101Scf04628g00001	0.996148	turquoise
Niben101Scf04656g00006	0.997748	turquoise
Niben101Scf04660g00011	0.978778	turquoise
Niben101Scf04711g00016	0.990046	turquoise
Niben101Scf04732g01028	0.915686	turquoise
Niben101Scf04740g00005	0.985625	turquoise
Niben101Scf04740g00007	0.984935	turquoise
Niben101Scf04765g02006	0.990531	turquoise
Niben101Scf04801g00001	0.975288	turquoise
Niben101Scf04802g01014	0.93047	turquoise
Niben101Scf04819g00002	0.972509	turquoise
Niben101Scf04819g02019	0.962599	turquoise
Niben101Scf04845g00017	0.994971	turquoise
Niben101Scf04852g01009	0.926369	turquoise
Niben101Scf04905g01005	0.955278	turquoise
Niben101Scf04910g01004	0.961081	turquoise
Niben101Scf04944g05002	0.871165	turquoise
Niben101Scf04995g07011	0.989233	turquoise
Niben101Scf04995g14009	0.99487	turquoise
Niben101Scf04995g15004	0.998145	turquoise
Niben101Scf05041g00001	0.999475	turquoise
Niben101Scf05044g00015	0.997902	turquoise
Niben101Scf05047g04009	0.984517	turquoise
Niben101Scf05060g07004	0.999705	turquoise
Niben101Scf05063g04023	0.97425	turquoise
Niben101Scf05122g00005	0.766816	turquoise
Niben101Scf05151g03015	0.981677	turquoise
Niben101Scf05152g03001	0.984843	turquoise
Niben101Scf05166g01022	0.958718	turquoise
Niben101Scf05226g08016	0.99574	turquoise
Niben101Scf05229g02004	0.997799	turquoise
Niben101Scf05232g02012	0.990679	turquoise
Niben101Scf05246g01009	0.972365	turquoise
Niben101Scf05286g00003	0.949923	turquoise
Niben101Scf05304g05005	0.996816	turquoise
Niben101Scf05307g00001	0.991499	turquoise
Niben101Scf05308g01010	0.989963	turquoise
Niben101Scf05319g05007	0.982327	turquoise
Niben101Scf05336g00011	0.907718	turquoise
Niben101Scf05371g00004	0.979183	turquoise
Niben101Scf05375g00003	0.975157	turquoise
Niben101Scf05385g01015	0.98238	turquoise
Niben101Scf05385g02008	0.997189	turquoise
Niben101Scf05385g03007	0.970012	turquoise
Niben101Scf05391g02018	0.981917	turquoise
Niben101Scf05430g00005	0.98615	turquoise
Niben101Scf05439g04002	0.996666	turquoise
Niben101Scf05444g04004	0.982791	turquoise
Niben101Scf05469g03004	0.971063	turquoise
Niben101Scf05483g08004	0.950012	turquoise
Niben101Scf05516g01004	0.899232	turquoise
Niben101Scf05549g02006	0.984748	turquoise
Niben101Scf05551g03011	0.973251	turquoise
Niben101Scf05554g07015	0.993226	turquoise
Niben101Scf05565g02022	0.998375	turquoise
Niben101Scf05583g00006	0.927168	turquoise
Niben101Scf05588g08004	0.997485	turquoise
Niben101Scf05610g00002	0.980029	turquoise
Niben101Scf05617g01020	0.983915	turquoise
Niben101Scf05631g00010	0.985685	turquoise
Niben101Scf05643g01012	0.981546	turquoise
Niben101Scf05645g00005	0.994704	turquoise
Niben101Scf05649g01008	0.983231	turquoise
Niben101Scf05692g04001	0.969842	turquoise
Niben101Scf05717g02005	0.974943	turquoise
Niben101Scf05731g00018	0.993818	turquoise
Niben101Scf05732g00014	0.957543	turquoise
Niben101Scf05750g02008	0.946252	turquoise
Niben101Scf05767g07005	0.961007	turquoise
Niben101Scf05804g02004	0.993252	turquoise
Niben101Scf05872g02002	0.972354	turquoise
Niben101Scf05892g00006	0.967809	turquoise
Niben101Scf05917g00003	0.980006	turquoise
Niben101Scf05919g01007	0.977092	turquoise
Niben101Scf05955g03003	0.990294	turquoise
Niben101Scf05956g00006	0.995361	turquoise
Niben101Scf05989g01008	0.977638	turquoise
Niben101Scf06076g00015	0.974289	turquoise
Niben101Scf06112g00006	0.955899	turquoise
Niben101Scf06117g02001	0.851522	turquoise
Niben101Scf06172g04003	0.981147	turquoise
Niben101Scf06172g04005	0.995615	turquoise
Niben101Scf06183g01007	0.999012	turquoise
Niben101Scf06187g01028	0.989536	turquoise
Niben101Scf06223g00003	0.999342	turquoise
Niben101Scf06238g01004	0.956689	turquoise
Niben101Scf06248g00007	0.968327	turquoise
Niben101Scf06249g00005	0.996504	turquoise
Niben101Scf06249g03003	0.981896	turquoise
Niben101Scf06249g05020	0.963707	turquoise
Niben101Scf06275g03010	0.978904	turquoise
Niben101Scf06275g03011	0.978374	turquoise
Niben101Scf06280g05017	0.99493	turquoise
Niben101Scf06286g01010	0.999493	turquoise
Niben101Scf06286g03008	0.950882	turquoise
Niben101Scf06311g00001	0.998333	turquoise
Niben101Scf06318g00005	0.975318	turquoise
Niben101Scf06344g04010	0.997776	turquoise
Niben101Scf06387g00008	0.992029	turquoise
Niben101Scf06390g00006	0.984409	turquoise
Niben101Scf06412g03016	0.952465	turquoise
Niben101Scf06424g01008	0.952878	turquoise
Niben101Scf06466g00002	0.984059	turquoise
Niben101Scf06482g02003	0.993548	turquoise
Niben101Scf06499g01002	0.998874	turquoise
Niben101Scf06514g03001	0.976878	turquoise
Niben101Scf06525g03013	0.953281	turquoise
Niben101Scf06529g06013	0.984434	turquoise
Niben101Scf06556g09001	0.973939	turquoise
Niben101Scf06565g00009	0.985647	turquoise
Niben101Scf06584g00004	0.976072	turquoise
Niben101Scf06602g00001	0.977159	turquoise
Niben101Scf06603g02002	0.985443	turquoise
Niben101Scf06603g03002	0.958887	turquoise
Niben101Scf06658g00002	0.973007	turquoise
Niben101Scf06674g05029	0.988543	turquoise
Niben101Scf06734g00014	0.997158	turquoise
Niben101Scf06734g01029	0.91636	turquoise
Niben101Scf06734g02027	0.99292	turquoise
Niben101Scf06736g07004	0.976515	turquoise
Niben101Scf06743g00022	0.973044	turquoise
Niben101Scf06761g02003	0.978258	turquoise
Niben101Scf06769g04022	0.933139	turquoise
Niben101Scf06788g00019	0.993264	turquoise
Niben101Scf06795g03005	0.964757	turquoise
Niben101Scf06799g04001	0.993037	turquoise
Niben101Scf06825g01018	0.984388	turquoise
Niben101Scf06848g10001	0.912615	turquoise
Niben101Scf06869g02006	0.986515	turquoise
Niben101Scf06883g01009	0.948573	turquoise
Niben101Scf06933g01002	0.967275	turquoise
Niben101Scf06990g00021	0.999891	turquoise
Niben101Scf06996g02040	0.989105	turquoise
Niben101Scf06999g01017	0.867042	turquoise
Niben101Scf07008g00005	0.961846	turquoise
Niben101Scf07023g00001	0.991958	turquoise
Niben101Scf07048g02008	0.964581	turquoise
Niben101Scf07137g01012	0.997678	turquoise
Niben101Scf07182g02004	0.917811	turquoise
Niben101Scf07182g03013	0.950866	turquoise
Niben101Scf07236g00011	0.959774	turquoise
Niben101Scf07287g02005	0.914882	turquoise
Niben101Scf07325g00030	0.976316	turquoise
Niben101Scf07355g01003	0.990124	turquoise
Niben101Scf07391g03011	0.995807	turquoise
Niben101Scf07395g00032	0.998079	turquoise
Niben101Scf07402g06007	0.961736	turquoise
Niben101Scf07404g04001	0.981704	turquoise
Niben101Scf07424g02022	0.993299	turquoise
Niben101Scf07441g03012	0.96251	turquoise
Niben101Scf07451g00011	0.984025	turquoise
Niben101Scf07465g02002	0.994171	turquoise
Niben101Scf07493g01001	0.999369	turquoise
Niben101Scf07509g00009	0.995211	turquoise
Niben101Scf07563g02004	0.988654	turquoise
Niben101Scf07578g00012	0.981065	turquoise
Niben101Scf07631g00004	0.959377	turquoise
Niben101Scf07639g02005	0.946718	turquoise
Niben101Scf07640g01014	0.969447	turquoise
Niben101Scf07650g02006	0.964884	turquoise
Niben101Scf07672g00014	0.979785	turquoise
Niben101Scf07672g00015	0.979095	turquoise
Niben101Scf07728g02014	0.994258	turquoise
Niben101Scf07812g00013	0.975139	turquoise
Niben101Scf07822g00009	0.963305	turquoise
Niben101Scf07825g02003	0.987753	turquoise
Niben101Scf07829g01013	0.988608	turquoise
Niben101Scf07913g00005	0.992103	turquoise
Niben101Scf08015g03003	0.99538	turquoise
Niben101Scf08018g00009	0.989583	turquoise
Niben101Scf08065g00002	0.997516	turquoise
Niben101Scf08102g00002	0.990597	turquoise
Niben101Scf08137g03002	0.956158	turquoise
Niben101Scf08142g03005	0.95554	turquoise
Niben101Scf08156g01001	0.98442	turquoise
Niben101Scf08156g09003	0.971522	turquoise
Niben101Scf08167g01004	0.973164	turquoise
Niben101Scf08195g05003	0.997187	turquoise
Niben101Scf08240g01016	0.996802	turquoise
Niben101Scf08338g00001	0.952553	turquoise
Niben101Scf08351g04013	0.988086	turquoise
Niben101Scf08351g04015	0.955522	turquoise
Niben101Scf08374g04001	0.98291	turquoise
Niben101Scf08415g01034	0.958571	turquoise
Niben101Scf08419g01022	0.998389	turquoise
Niben101Scf08426g00011	0.96323	turquoise
Niben101Scf08465g02007	0.984439	turquoise
Niben101Scf08508g00008	0.985703	turquoise
Niben101Scf08604g00003	0.994015	turquoise
Niben101Scf08617g00004	0.962299	turquoise
Niben101Scf08627g00004	0.974456	turquoise
Niben101Scf08704g01003	0.995627	turquoise
Niben101Scf08707g00001	0.924715	turquoise
Niben101Scf08791g03011	0.976065	turquoise
Niben101Scf08855g00008	0.942586	turquoise
Niben101Scf08895g01016	0.997715	turquoise
Niben101Scf08926g01013	0.960227	turquoise
Niben101Scf08942g00013	0.980292	turquoise
Niben101Scf08973g00018	0.961621	turquoise
Niben101Scf09010g04002	0.974584	turquoise
Niben101Scf09014g01003	0.995818	turquoise
Niben101Scf09107g00007	0.989355	turquoise
Niben101Scf09127g01001	0.996264	turquoise
Niben101Scf09149g01005	0.918871	turquoise
Niben101Scf09242g02014	0.998182	turquoise
Niben101Scf09248g06007	0.996826	turquoise
Niben101Scf09260g01010	0.964611	turquoise
Niben101Scf09284g01022	0.990614	turquoise
Niben101Scf09315g01017	0.986271	turquoise
Niben101Scf09321g02026	0.994074	turquoise
Niben101Scf09353g06003	0.952245	turquoise
Niben101Scf09403g00017	0.999739	turquoise
Niben101Scf09433g00001	0.985474	turquoise
Niben101Scf09445g00001	0.976474	turquoise
Niben101Scf09445g04020	0.977202	turquoise
Niben101Scf09475g01017	0.948122	turquoise
Niben101Scf09523g01007	0.954195	turquoise
Niben101Scf09523g02006	0.996691	turquoise
Niben101Scf09541g00005	0.974787	turquoise
Niben101Scf09663g05001	0.995444	turquoise
Niben101Scf09741g00010	0.8193	turquoise
Niben101Scf09801g02005	0.9994	turquoise
Niben101Scf09822g00004	0.983148	turquoise
Niben101Scf09846g02023	0.984799	turquoise
Niben101Scf09871g00007	0.987906	turquoise
Niben101Scf09876g00011	0.960627	turquoise
Niben101Scf09928g01032	0.975546	turquoise
Niben101Scf09993g00001	0.98099	turquoise
Niben101Scf10122g01005	0.974905	turquoise
Niben101Scf10126g00007	0.936636	turquoise
Niben101Scf10343g01001	0.95481	turquoise
Niben101Scf10360g00008	0.985968	turquoise
Niben101Scf10375g01002	0.953978	turquoise
Niben101Scf10384g02008	0.987426	turquoise
Niben101Scf10431g00014	0.975942	turquoise
Niben101Scf10475g00002	0.960285	turquoise
Niben101Scf10524g02015	0.980539	turquoise
Niben101Scf10524g04002	0.98527	turquoise
Niben101Scf10535g01012	0.996955	turquoise
Niben101Scf10616g01013	0.944272	turquoise
Niben101Scf10735g00018	0.985163	turquoise
Niben101Scf10774g02003	0.9941	turquoise
Niben101Scf10811g00005	0.923386	turquoise
Niben101Scf10887g00005	0.989415	turquoise
Niben101Scf10999g00004	0.995981	turquoise
Niben101Scf11009g00010	0.994956	turquoise
Niben101Scf11072g00003	0.993737	turquoise
Niben101Scf11107g00008	0.946261	turquoise
Niben101Scf11108g00011	0.975489	turquoise
Niben101Scf11169g00005	0.992961	turquoise
Niben101Scf11232g01011	0.990443	turquoise
Niben101Scf11251g00008	0.997449	turquoise
Niben101Scf11303g01015	0.994176	turquoise
Niben101Scf11334g02002	0.982501	turquoise
Niben101Scf11401g01012	0.997353	turquoise
Niben101Scf11401g01013	0.996671	turquoise
Niben101Scf11446g00005	0.941829	turquoise
Niben101Scf11447g02007	0.995013	turquoise
Niben101Scf11552g02001	0.987532	turquoise
Niben101Scf11684g03001	0.992218	turquoise
Niben101Scf11688g01013	0.972836	turquoise
Niben101Scf11723g01004	0.952885	turquoise
Niben101Scf11767g02018	0.979362	turquoise
Niben101Scf11782g01001	0.947147	turquoise
Niben101Scf11814g00004	0.983882	turquoise
Niben101Scf11860g00007	0.946614	turquoise
Niben101Scf11936g01016	0.949834	turquoise
Niben101Scf11936g01017	0.993325	turquoise
Niben101Scf11978g04001	0.998451	turquoise
Niben101Scf12129g00001	0.989869	turquoise
Niben101Scf12160g00012	0.939983	turquoise
Niben101Scf12205g03015	0.988173	turquoise
Niben101Scf12266g00001	0.983393	turquoise
Niben101Scf12270g00012	0.976372	turquoise
Niben101Scf12280g01013	0.975127	turquoise
Niben101Scf12318g00006	0.971122	turquoise
Niben101Scf12320g03008	0.979366	turquoise
Niben101Scf12367g00001	0.98926	turquoise
Niben101Scf12394g01002	0.974569	turquoise
Niben101Scf12410g00018	0.967906	turquoise
Niben101Scf12522g01003	0.904846	turquoise
Niben101Scf12928g01003	0.971684	turquoise
Niben101Scf12938g00002	0.761419	turquoise
Niben101Scf13146g00005	0.997944	turquoise
Niben101Scf13199g00011	0.991393	turquoise
Niben101Scf13203g00006	0.990034	turquoise
Niben101Scf13206g00003	0.996905	turquoise
Niben101Scf13221g00005	0.990661	turquoise
Niben101Scf13411g01001	0.978897	turquoise
Niben101Scf13429g00002	0.99841	turquoise
Niben101Scf13429g03011	0.952531	turquoise
Niben101Scf13549g00004	0.960318	turquoise
Niben101Scf13680g03001	0.997953	turquoise
Niben101Scf13868g00003	0.994627	turquoise
Niben101Scf13926g01003	0.987537	turquoise
Niben101Scf14115g00003	0.791163	turquoise
Niben101Scf14118g00012	0.996733	turquoise
Niben101Scf14523g00003	0.919548	turquoise
Niben101Scf14996g00009	0.999047	turquoise
Niben101Scf15065g00001	0.982274	turquoise
Niben101Scf15192g01004	0.932483	turquoise
Niben101Scf15451g00001	0.99465	turquoise
Niben101Scf15536g01018	0.932877	turquoise
Niben101Scf15536g03005	0.958189	turquoise
Niben101Scf15541g00008	0.967873	turquoise
Niben101Scf15543g01002	0.969275	turquoise
Niben101Scf15564g00001	0.994489	turquoise
Niben101Scf15710g00010	0.964952	turquoise
Niben101Scf15723g00003	0.931029	turquoise
Niben101Scf15836g04014	0.989843	turquoise
Niben101Scf15972g01020	0.999234	turquoise
Niben101Scf16015g04006	0.999835	turquoise
Niben101Scf16244g02026	0.979544	turquoise
Niben101Scf16258g02004	0.983248	turquoise
Niben101Scf16313g00003	0.996793	turquoise
Niben101Scf16437g00002	0.996827	turquoise
Niben101Scf16733g01032	0.968146	turquoise
Niben101Scf17500g00004	0.973945	turquoise
Niben101Scf17672g00002	0.948063	turquoise
Niben101Scf17819g00005	0.943945	turquoise
Niben101Scf18401g00009	0.989007	turquoise
Niben101Scf18418g00008	0.967838	turquoise
Niben101Scf19091g00022	0.965995	turquoise
Niben101Scf19143g00006	0.966654	turquoise
Niben101Scf19266g01002	0.953592	turquoise
Niben101Scf21202g00005	0.940878	turquoise
Niben101Scf21257g00020	0.99535	turquoise
Niben101Scf21401g00003	0.921804	turquoise
Niben101Scf23111g00012	0.956061	turquoise
Niben101Scf23557g00021	0.961539	turquoise
Niben101Scf24096g00020	0.995345	turquoise
Niben101Scf24868g00004	0.955329	turquoise
Niben101Scf25069g01006	0.998211	turquoise
Niben101Scf25617g00007	0.966075	turquoise
Niben101Scf28230g00019	0.965993	turquoise
Niben101Scf28780g01002	0.984925	turquoise
Niben101Scf31181g00005	0.987815	turquoise
Niben101Scf32212g00015	0.985631	turquoise
Niben101Scf32649g00006	0.963548	turquoise
Niben101Scf32862g01001	0.848014	turquoise
Niben101Scf33211g00002	0.998104	turquoise
Niben101Scf33628g00006	0.999307	turquoise
Niben101Scf33912g00006	0.975028	turquoise
Niben101Scf38997g00004	0.939601	turquoise
Niben101Scf39295g00002	0.999746	turquoise
Nicotiana_benthamiana_newGene_10092	0.959685	turquoise
Nicotiana_benthamiana_newGene_10103	0.774816	turquoise
Nicotiana_benthamiana_newGene_10238	0.952053	turquoise
Nicotiana_benthamiana_newGene_10656	0.946083	turquoise
Nicotiana_benthamiana_newGene_10676	0.976255	turquoise
Nicotiana_benthamiana_newGene_10677	0.972691	turquoise
Nicotiana_benthamiana_newGene_12423	0.972836	turquoise
Nicotiana_benthamiana_newGene_12747	0.950037	turquoise
Nicotiana_benthamiana_newGene_13646	0.909486	turquoise
Nicotiana_benthamiana_newGene_14017	0.984845	turquoise
Nicotiana_benthamiana_newGene_14225	0.983366	turquoise
Nicotiana_benthamiana_newGene_14756	0.959066	turquoise
Nicotiana_benthamiana_newGene_14877	0.983901	turquoise
Nicotiana_benthamiana_newGene_15011	0.998926	turquoise
Nicotiana_benthamiana_newGene_17587	0.959921	turquoise
Nicotiana_benthamiana_newGene_18256	0.962367	turquoise
Nicotiana_benthamiana_newGene_20	0.957859	turquoise
Nicotiana_benthamiana_newGene_2012	0.93005	turquoise
Nicotiana_benthamiana_newGene_2300	0.988747	turquoise
Nicotiana_benthamiana_newGene_3011	0.933832	turquoise
Nicotiana_benthamiana_newGene_3773	0.916877	turquoise
Nicotiana_benthamiana_newGene_3857	0.880258	turquoise
Nicotiana_benthamiana_newGene_5212	0.944942	turquoise
Nicotiana_benthamiana_newGene_5621	0.994976	turquoise
Nicotiana_benthamiana_newGene_5935	0.999123	turquoise
Nicotiana_benthamiana_newGene_699	0.923196	turquoise
Nicotiana_benthamiana_newGene_718	0.988341	turquoise
Nicotiana_benthamiana_newGene_8173	0.99692	turquoise
Nicotiana_benthamiana_newGene_8272	0.968722	turquoise
Nicotiana_benthamiana_newGene_8301	0.882618	turquoise
Nicotiana_benthamiana_newGene_8374	0.986223	turquoise
Nicotiana_benthamiana_newGene_8412	0.933411	turquoise
Nicotiana_benthamiana_newGene_9449	0.907534	turquoise
Nicotiana_benthamiana_newGene_9665	0.781144	turquoise
Niben101Ctg13736g00004	0.993317	yellow
Niben101Scf00090g13009	0.998893	yellow
Niben101Scf00107g03008	0.996802	yellow
Niben101Scf00189g03001	0.978353	yellow
Niben101Scf00539g05008	0.994631	yellow
Niben101Scf00539g05009	0.987092	yellow
Niben101Scf00578g03001	0.998082	yellow
Niben101Scf00640g04023	0.977341	yellow
Niben101Scf00735g01001	0.938008	yellow
Niben101Scf00773g05007	0.989169	yellow
Niben101Scf00780g01029	0.995708	yellow
Niben101Scf00869g06025	0.992593	yellow
Niben101Scf00898g01008	0.998693	yellow
Niben101Scf01001g00003	0.992949	yellow
Niben101Scf01001g00004	0.992583	yellow
Niben101Scf01001g00005	0.99385	yellow
Niben101Scf01133g11002	0.997622	yellow
Niben101Scf01400g00014	0.995669	yellow
Niben101Scf01432g04001	0.9898	yellow
Niben101Scf01492g01005	0.991663	yellow
Niben101Scf01546g00012	0.997392	yellow
Niben101Scf01587g01006	0.971749	yellow
Niben101Scf01623g01028	0.981974	yellow
Niben101Scf01942g04001	0.958704	yellow
Niben101Scf01951g01008	0.999954	yellow
Niben101Scf02041g00002	0.896441	yellow
Niben101Scf02066g03007	0.986797	yellow
Niben101Scf02551g01007	0.964893	yellow
Niben101Scf02576g00008	0.972232	yellow
Niben101Scf02812g03006	0.994041	yellow
Niben101Scf03280g00007	0.961742	yellow
Niben101Scf03765g00002	0.995771	yellow
Niben101Scf03801g00003	0.977861	yellow
Niben101Scf03908g02006	0.997364	yellow
Niben101Scf04011g11005	0.991884	yellow
Niben101Scf04015g01004	0.981818	yellow
Niben101Scf04122g06005	0.971148	yellow
Niben101Scf04276g04022	0.996273	yellow
Niben101Scf04404g05001	0.986077	yellow
Niben101Scf05146g04021	0.939125	yellow
Niben101Scf05245g01007	0.998058	yellow
Niben101Scf05323g01002	0.983727	yellow
Niben101Scf06280g06001	0.994365	yellow
Niben101Scf06323g01002	0.994758	yellow
Niben101Scf06996g02041	0.990893	yellow
Niben101Scf07073g03008	0.994594	yellow
Niben101Scf07442g00008	0.973832	yellow
Niben101Scf08001g00002	0.990713	yellow
Niben101Scf08804g01015	0.997996	yellow
Niben101Scf08940g01006	0.988442	yellow
Niben101Scf09740g00003	0.994184	yellow
Niben101Scf10927g00019	0.999249	yellow
Niben101Scf10927g00021	0.998405	yellow
Niben101Scf11922g01009	0.98877	yellow
Niben101Scf13103g01042	0.979993	yellow
Niben101Scf14022g00011	0.990562	yellow
Niben101Scf14311g00012	0.96301	yellow
Niben101Scf16105g00008	0.965703	yellow
Niben101Scf17237g00001	0.999701	yellow
Niben101Scf20727g00001	0.992734	yellow
Niben101Scf27945g00015	0.987915	yellow
Nicotiana_benthamiana_newGene_10914	0.993562	yellow
Nicotiana_benthamiana_newGene_12256	0.973425	yellow
Nicotiana_benthamiana_newGene_1648	0.955839	yellow
Nicotiana_benthamiana_newGene_17267	0.993444	yellow
Nicotiana_benthamiana_newGene_2815	0.999064	yellow
Nicotiana_benthamiana_newGene_8756	0.995447	yellow
