# Supplementary material for: Reactive oxygen species-related genes participate in resistance to cucumber green mottle mosaic virus infection regulated by boron in Nicotiana benthamiana and watermelon
Source: Front Plant Sci. 2022 Nov 11;13:1027404. doi: 10.3389/fpls.2022.1027404 (PMC9691971; doi:10.3389/fpls.2022.1027404)
Supplement: Supplementary file 9 [file Table_8.xlsx]

## Sheet: yellow
Supplementary Table 8. GO analysis of DEGs of modules.
BP
GO.ID	Term	Annotated	Significant	Expected	KS
GO:0009765	photosynthesis, light harvesting	112	0	0.15	8.8e-05
GO:1902600	hydrogen ion transmembrane transport	442	1	0.61	0.00043
GO:0006457	protein folding	404	0	0.56	0.00096
GO:0017157	regulation of exocytosis	10	0	0.01	0.0011
GO:0046274	lignin catabolic process	49	0	0.07	0.0047
GO:0051307	meiotic chromosome separation	16	0	0.02	0.00477
GO:0000911	cytokinesis by cell plate formation	44	0	0.06	0.00575
GO:0043622	cortical microtubule organization	6	0	0.01	0.00623
GO:0044267	cellular protein metabolic process	6165	3	8.52	0.00664
GO:0030433	ER-associated ubiquitin-dependent protein catabolic process	55	0	0.08	0.00678
GO:0009308	amine metabolic process	195	1	0.27	0.00697
GO:0009115	xanthine catabolic process	9	0	0.01	0.00721
GO:0006165	nucleoside diphosphate phosphorylation	13	0	0.02	0.0076
GO:0006183	GTP biosynthetic process	13	0	0.02	0.0076
GO:0006228	UTP biosynthetic process	13	0	0.02	0.0076
GO:0010051	xylem and phloem pattern formation	35	0	0.05	0.00838
GO:0010603	regulation of cytoplasmic mRNA processing body assembly	10	0	0.01	0.00843
GO:0046034	ATP metabolic process	455	1	0.63	0.00863
GO:0098656	anion transmembrane transport	269	1	0.37	0.00875
GO:0009870	defense response signaling pathway, resistance gene-dependent	13	0	0.02	0.00894
GO:0055085	transmembrane transport	2027	7	2.8	0.00927
GO:0006732	coenzyme metabolic process	332	0	0.46	0.00964
GO:0008356	asymmetric cell division	11	0	0.02	0.01083
GO:0046942	carboxylic acid transport	208	0	0.29	0.011
GO:0015849	organic acid transport	208	0	0.29	0.011
GO:0006740	NADPH regeneration	49	0	0.07	0.01248
GO:0006098	pentose-phosphate shunt	49	0	0.07	0.01248
GO:0006835	dicarboxylic acid transport	47	0	0.06	0.01519
GO:0009052	pentose-phosphate shunt, non-oxidative branch	16	0	0.02	0.0152
GO:0010305	leaf vascular tissue pattern formation	18	0	0.02	0.01631
GO:0030150	protein import into mitochondrial matrix	40	0	0.06	0.01638
GO:0042775	mitochondrial ATP synthesis coupled electron transport	53	0	0.07	0.01651
GO:0042451	purine nucleoside biosynthetic process	325	1	0.45	0.01667
GO:0046129	purine ribonucleoside biosynthetic process	325	1	0.45	0.01667
GO:0006730	one-carbon metabolic process	72	0	0.1	0.01697
GO:0032958	inositol phosphate biosynthetic process	6	0	0.01	0.01758
GO:0015740	C4-dicarboxylate transport	29	0	0.04	0.01851
GO:0009100	glycoprotein metabolic process	155	0	0.21	0.01888
GO:0009101	glycoprotein biosynthetic process	155	0	0.21	0.01888
GO:0006556	S-adenosylmethionine biosynthetic process	18	0	0.02	0.01894
GO:0006887	exocytosis	173	0	0.24	0.01989
GO:0015743	malate transport	27	0	0.04	0.0203
GO:0010496	intercellular transport	21	0	0.03	0.02096
GO:0009902	chloroplast relocation	30	0	0.04	0.02161
GO:0051667	establishment of plastid localization	30	0	0.04	0.02161
GO:0051644	plastid localization	30	0	0.04	0.02161
GO:0070085	glycosylation	170	0	0.23	0.02167
GO:0006865	amino acid transport	145	0	0.2	0.0226
GO:0051640	organelle localization	61	0	0.08	0.02365
GO:0046836	glycolipid transport	9	0	0.01	0.02507
GO:0006591	ornithine metabolic process	18	0	0.02	0.02567
GO:0009631	cold acclimation	15	0	0.02	0.02583
GO:0006486	protein glycosylation	147	0	0.2	0.02633
GO:0043413	macromolecule glycosylation	147	0	0.2	0.02633
GO:0098661	inorganic anion transmembrane transport	58	1	0.08	0.0266
GO:0000712	resolution of meiotic recombination intermediates	12	0	0.02	0.02704
GO:0006739	NADP metabolic process	53	0	0.07	0.02748
GO:0030010	establishment of cell polarity	7	0	0.01	0.02806
GO:0007163	establishment or maintenance of cell polarity	7	0	0.01	0.02806
GO:0030091	protein repair	36	0	0.05	0.02846
GO:0017004	cytochrome complex assembly	124	0	0.17	0.0287
GO:0072522	purine-containing compound biosynthetic process	372	1	0.51	0.02903
GO:0032940	secretion by cell	187	0	0.26	0.02923
GO:0009637	response to blue light	17	0	0.02	0.02964
GO:0006164	purine nucleotide biosynthetic process	327	1	0.45	0.02974
GO:0009082	branched-chain amino acid biosynthetic process	36	0	0.05	0.02992
GO:1901137	carbohydrate derivative biosynthetic process	687	1	0.95	0.03099
GO:0006972	hyperosmotic response	24	0	0.03	0.03231
GO:0034050	host programmed cell death induced by symbiont	37	4	0.05	0.03276
GO:0009626	plant-type hypersensitive response	37	4	0.05	0.03276
GO:0008616	queuosine biosynthetic process	15	0	0.02	0.03308
GO:0046116	queuosine metabolic process	15	0	0.02	0.03308
GO:0010431	seed maturation	40	1	0.06	0.03342
GO:0006544	glycine metabolic process	37	0	0.05	0.03368
GO:0010087	phloem or xylem histogenesis	44	0	0.06	0.03381
GO:0006595	polyamine metabolic process	49	0	0.07	0.03417
GO:0000710	meiotic mismatch repair	11	0	0.02	0.0343
GO:0010204	defense response signaling pathway, resistance gene-independent	10	0	0.01	0.03436
GO:0000027	ribosomal large subunit assembly	87	0	0.12	0.0348
GO:0009152	purine ribonucleotide biosynthetic process	325	1	0.45	0.03724
GO:0046451	diaminopimelate metabolic process	21	0	0.03	0.03834
GO:0009085	lysine biosynthetic process	21	0	0.03	0.03834
GO:0009089	lysine biosynthetic process via diaminopimelate	21	0	0.03	0.03834
GO:0051656	establishment of organelle localization	57	0	0.08	0.03959
GO:0044106	cellular amine metabolic process	138	0	0.19	0.03967
GO:0000060	protein import into nucleus, translocation	14	0	0.02	0.04116
GO:0006610	ribosomal protein import into nucleus	14	0	0.02	0.04116
GO:0042989	sequestering of actin monomers	9	0	0.01	0.04155
GO:0007005	mitochondrion organization	201	0	0.28	0.0424
GO:0046500	S-adenosylmethionine metabolic process	31	0	0.04	0.04399
GO:0009309	amine biosynthetic process	77	0	0.11	0.04449
GO:0042401	cellular biogenic amine biosynthetic process	77	0	0.11	0.04449
GO:0016197	endosomal transport	65	0	0.09	0.0449
GO:0010540	basipetal auxin transport	7	0	0.01	0.04524
GO:0042147	retrograde transport, endosome to Golgi	31	0	0.04	0.0459
GO:0010311	lateral root formation	24	0	0.03	0.04692
GO:0009059	macromolecule biosynthetic process	4948	3	6.84	0.0486
GO:0009168	purine ribonucleoside monophosphate biosynthetic process	278	1	0.38	0.0491
GO:0009127	purine nucleoside monophosphate biosynthetic process	278	1	0.38	0.0491
GO:0006163	purine nucleotide metabolic process	705	1	0.97	0.04916
GO:0015807	L-amino acid transport	31	0	0.04	0.04948
GO:0006542	glutamine biosynthetic process	9	0	0.01	0.0495
GO:0009768	photosynthesis, light harvesting in photosystem I	42	0	0.06	0.04977
GO:0000304	response to singlet oxygen	10	0	0.01	0.05012
GO:0051181	cofactor transport	79	0	0.11	0.051
GO:0000469	cleavage involved in rRNA processing	34	0	0.05	0.05103
GO:0010506	regulation of autophagy	12	0	0.02	0.05114
GO:0071423	malate transmembrane transport	18	0	0.02	0.05141
GO:0018201	peptidyl-glycine modification	9	0	0.01	0.05207
GO:0018008	N-terminal peptidyl-glycine N-myristoylation	9	0	0.01	0.05207
GO:0006842	tricarboxylic acid transport	11	0	0.02	0.05272
GO:0006893	Golgi to plasma membrane transport	13	0	0.02	0.05282
GO:0009097	isoleucine biosynthetic process	22	0	0.03	0.05339
GO:0006549	isoleucine metabolic process	22	0	0.03	0.05339
GO:0006607	NLS-bearing protein import into nucleus	30	0	0.04	0.05486
GO:0006007	glucose catabolic process	53	0	0.07	0.05531
GO:0007059	chromosome segregation	87	0	0.12	0.05675
GO:0009690	cytokinin metabolic process	44	1	0.06	0.05707
GO:0071051	polyadenylation-dependent snoRNA 3'-end processing	9	0	0.01	0.05723
GO:0016074	snoRNA metabolic process	9	0	0.01	0.05723
GO:0031126	snoRNA 3'-end processing	9	0	0.01	0.05723
GO:0043144	snoRNA processing	9	0	0.01	0.05723
GO:0006553	lysine metabolic process	22	0	0.03	0.0574
GO:0098660	inorganic ion transmembrane transport	747	3	1.03	0.05803
GO:0010497	plasmodesmata-mediated intercellular transport	11	0	0.02	0.05815
GO:0034645	cellular macromolecule biosynthetic process	4856	3	6.71	0.05845
GO:1901678	iron coordination entity transport	66	0	0.09	0.05944
GO:0015886	heme transport	66	0	0.09	0.05944
GO:0010039	response to iron ion	20	0	0.03	0.05956
GO:0046903	secretion	191	0	0.26	0.05964
GO:0042455	ribonucleoside biosynthetic process	371	1	0.51	0.05979
GO:0005978	glycogen biosynthetic process	19	0	0.03	0.06091
GO:0009903	chloroplast avoidance movement	19	0	0.03	0.0614
GO:0006303	double-strand break repair via nonhomologous end joining	14	0	0.02	0.06154
GO:0000726	non-recombinational repair	14	0	0.02	0.06154
GO:0006289	nucleotide-excision repair	45	0	0.06	0.06164
GO:0042274	ribosomal small subunit biogenesis	191	0	0.26	0.06188
GO:0006108	malate metabolic process	47	0	0.06	0.06263
GO:0018298	protein-chromophore linkage	150	0	0.21	0.06286
GO:0072524	pyridine-containing compound metabolic process	94	0	0.13	0.06288
GO:0033609	oxalate metabolic process	38	0	0.05	0.06488
GO:0010030	positive regulation of seed germination	6	0	0.01	0.06523
GO:0036297	interstrand cross-link repair	7	0	0.01	0.06533
GO:0015672	monovalent inorganic cation transport	718	1	0.99	0.06613
GO:0000919	cell plate assembly	14	0	0.02	0.06699
GO:0009124	nucleoside monophosphate biosynthetic process	315	1	0.44	0.06712
GO:0044699	single-organism process	13784	25	19.04	0.06715
GO:0009163	nucleoside biosynthetic process	374	1	0.52	0.06827
GO:0015698	inorganic anion transport	147	1	0.2	0.06834
GO:0010467	gene expression	5459	3	7.54	0.06984
GO:0071897	DNA biosynthetic process	50	0	0.07	0.06994
GO:0009167	purine ribonucleoside monophosphate metabolic process	509	1	0.7	0.07122
GO:0009126	purine nucleoside monophosphate metabolic process	509	1	0.7	0.07122
GO:0031935	regulation of chromatin silencing	13	0	0.02	0.07144
GO:0009150	purine ribonucleotide metabolic process	698	1	0.96	0.07231
GO:0045490	pectin catabolic process	150	0	0.21	0.07328
GO:0042816	vitamin B6 metabolic process	11	0	0.02	0.07353
GO:0042819	vitamin B6 biosynthetic process	11	0	0.02	0.07353
GO:0016117	carotenoid biosynthetic process	41	0	0.06	0.07355
GO:0016109	tetraterpenoid biosynthetic process	41	0	0.06	0.07355
GO:0042254	ribosome biogenesis	602	0	0.83	0.07358
GO:0070585	protein localization to mitochondrion	82	0	0.11	0.07467
GO:0072655	establishment of protein localization to mitochondrion	82	0	0.11	0.07467
GO:0006626	protein targeting to mitochondrion	82	0	0.11	0.07467
GO:0006733	oxidoreduction coenzyme metabolic process	95	0	0.13	0.07537
GO:0046128	purine ribonucleoside metabolic process	718	1	0.99	0.07721
GO:1902593	single-organism nuclear import	90	0	0.12	0.07746
GO:0044744	protein targeting to nucleus	90	0	0.12	0.07746
GO:0051170	nuclear import	90	0	0.12	0.07746
GO:0006606	protein import into nucleus	90	0	0.12	0.07746
GO:0042273	ribosomal large subunit biogenesis	184	0	0.25	0.07772
GO:0042255	ribosome assembly	169	0	0.23	0.0785
GO:0010343	singlet oxygen-mediated programmed cell death	9	0	0.01	0.07875
GO:0071452	cellular response to singlet oxygen	9	0	0.01	0.07875
GO:0036473	cell death in response to oxidative stress	9	0	0.01	0.07875
GO:0097468	programmed cell death in response to reactive oxygen species	9	0	0.01	0.07875
GO:0003333	amino acid transmembrane transport	130	0	0.18	0.07909
GO:0006412	translation	1714	0	2.37	0.07999
GO:0060249	anatomical structure homeostasis	41	0	0.06	0.08052
GO:0009108	coenzyme biosynthetic process	197	0	0.27	0.0806
GO:0019752	carboxylic acid metabolic process	1805	3	2.49	0.08138
GO:0043648	dicarboxylic acid metabolic process	174	0	0.24	0.08142
GO:0009800	cinnamic acid biosynthetic process	18	0	0.02	0.08166
GO:0009803	cinnamic acid metabolic process	18	0	0.02	0.08166
GO:0008037	cell recognition	63	0	0.09	0.08243
GO:0048544	recognition of pollen	63	0	0.09	0.08243
GO:0042538	hyperosmotic salinity response	21	0	0.03	0.08276
GO:1901659	glycosyl compound biosynthetic process	379	1	0.52	0.08435
GO:0060968	regulation of gene silencing	20	0	0.03	0.08619
GO:0015985	energy coupled proton transport, down electrochemical gradient	187	1	0.26	0.08657
GO:0015986	ATP synthesis coupled proton transport	187	1	0.26	0.08657
GO:0018377	protein myristoylation	10	0	0.01	0.08674
GO:0006498	N-terminal protein lipidation	10	0	0.01	0.08674
GO:0006499	N-terminal protein myristoylation	10	0	0.01	0.08674
GO:0016192	vesicle-mediated transport	669	0	0.92	0.08711
GO:0000272	polysaccharide catabolic process	309	2	0.43	0.08719
GO:0016116	carotenoid metabolic process	47	0	0.06	0.08741
GO:0016108	tetraterpenoid metabolic process	47	0	0.06	0.08741
GO:0046040	IMP metabolic process	35	0	0.05	0.08759
GO:0080050	regulation of seed development	18	0	0.02	0.08904
GO:0018108	peptidyl-tyrosine phosphorylation	48	0	0.07	0.08916
GO:0018212	peptidyl-tyrosine modification	48	0	0.07	0.08916
GO:0032200	telomere organization	39	0	0.05	0.08952
GO:0000723	telomere maintenance	39	0	0.05	0.08952
GO:0015936	coenzyme A metabolic process	42	0	0.06	0.09098
GO:0046365	monosaccharide catabolic process	57	0	0.08	0.09116
GO:0019320	hexose catabolic process	57	0	0.08	0.09116
GO:0034754	cellular hormone metabolic process	47	1	0.06	0.09126
GO:0017038	protein import	193	0	0.27	0.09151
GO:0009145	purine nucleoside triphosphate biosynthetic process	241	1	0.33	0.09155
GO:0009206	purine ribonucleoside triphosphate biosynthetic process	241	1	0.33	0.09155
GO:0090002	establishment of protein localization to plasma membrane	7	0	0.01	0.09159
GO:0043001	Golgi to plasma membrane protein transport	7	0	0.01	0.09159
GO:0007009	plasma membrane organization	7	0	0.01	0.09159
GO:0072659	protein localization to plasma membrane	7	0	0.01	0.09159
GO:0006754	ATP biosynthetic process	228	1	0.31	0.09204
GO:0022610	biological adhesion	11	0	0.02	0.09227
GO:0007155	cell adhesion	11	0	0.02	0.09227
GO:0009904	chloroplast accumulation movement	22	0	0.03	0.09232
GO:0007265	Ras protein signal transduction	26	0	0.04	0.09239
GO:0046578	regulation of Ras protein signal transduction	26	0	0.04	0.09239
GO:0051056	regulation of small GTPase mediated signal transduction	26	0	0.04	0.09239
GO:0032011	ARF protein signal transduction	26	0	0.04	0.09239
GO:0032012	regulation of ARF protein signal transduction	26	0	0.04	0.09239
GO:0009820	alkaloid metabolic process	6	0	0.01	0.09249
GO:0009821	alkaloid biosynthetic process	6	0	0.01	0.09249
GO:0032509	endosome transport via multivesicular body sorting pathway	15	0	0.02	0.09488
GO:0045903	positive regulation of translational fidelity	25	0	0.03	0.09509
GO:0010231	maintenance of seed dormancy	8	0	0.01	0.09523
GO:0097437	maintenance of dormancy	8	0	0.01	0.09523
GO:0044000	movement in host	15	0	0.02	0.09584
GO:0051814	movement in other organism involved in symbiotic interaction	15	0	0.02	0.09584
GO:0052192	movement in environment of other organism involved in symbiotic interaction	15	0	0.02	0.09584
GO:0052126	movement in host environment	15	0	0.02	0.09584
GO:0044766	multi-organism transport	15	0	0.02	0.09584
GO:0046794	transport of virus	15	0	0.02	0.09584
GO:0046739	transport of virus in multicellular host	15	0	0.02	0.09584
GO:0098662	inorganic cation transmembrane transport	712	2	0.98	0.09617
GO:0071554	cell wall organization or biogenesis	810	3	1.12	0.09778
GO:0000187	activation of MAPK activity	7	0	0.01	0.09819
GO:1902533	positive regulation of intracellular signal transduction	7	0	0.01	0.09819
GO:0043410	positive regulation of MAPK cascade	7	0	0.01	0.09819
GO:0043406	positive regulation of MAP kinase activity	7	0	0.01	0.09819
GO:0033387	putrescine biosynthetic process from ornithine	7	0	0.01	0.09859
GO:0001927	exocyst assembly	11	0	0.02	0.09887
GO:0010332	response to gamma radiation	10	0	0.01	0.10019
GO:2000896	amylopectin metabolic process	7	0	0.01	0.1005
GO:0010021	amylopectin biosynthetic process	7	0	0.01	0.1005
GO:0051649	establishment of localization in cell	1057	0	1.46	0.10155
GO:0009156	ribonucleoside monophosphate biosynthetic process	304	1	0.42	0.10239
GO:0051601	exocyst localization	15	0	0.02	0.10259
GO:0098586	cellular response to virus	6	0	0.01	0.10262
GO:0018130	heterocycle biosynthetic process	3421	5	4.73	0.10269
GO:0034032	purine nucleoside bisphosphate metabolic process	54	0	0.07	0.1028
GO:0033865	nucleoside bisphosphate metabolic process	54	0	0.07	0.1028
GO:0033875	ribonucleoside bisphosphate metabolic process	54	0	0.07	0.1028
GO:0009617	response to bacterium	109	0	0.15	0.10387
GO:0006189	'de novo' IMP biosynthetic process	28	0	0.04	0.10461
GO:0009875	pollen-pistil interaction	65	0	0.09	0.1049
GO:0046173	polyol biosynthetic process	12	0	0.02	0.10494
GO:0006435	threonyl-tRNA aminoacylation	7	0	0.01	0.10557
GO:0009060	aerobic respiration	139	0	0.19	0.10618
GO:0006596	polyamine biosynthetic process	44	0	0.06	0.10628
GO:0006979	response to oxidative stress	400	1	0.55	0.10637
GO:0006122	mitochondrial electron transport, ubiquinol to cytochrome c	30	0	0.04	0.10724
GO:0002181	cytoplasmic translation	131	0	0.18	0.10726
GO:0046653	tetrahydrofolate metabolic process	34	0	0.05	0.10743
GO:0010951	negative regulation of endopeptidase activity	53	0	0.07	0.10785
GO:0052548	regulation of endopeptidase activity	53	0	0.07	0.10785
GO:0009123	nucleoside monophosphate metabolic process	546	1	0.75	0.10787
GO:0009081	branched-chain amino acid metabolic process	62	0	0.09	0.10841
GO:0006188	IMP biosynthetic process	31	0	0.04	0.10851
GO:1901661	quinone metabolic process	28	0	0.04	0.10962
GO:1901663	quinone biosynthetic process	28	0	0.04	0.10962
GO:0042181	ketone biosynthetic process	28	0	0.04	0.10962
GO:0019321	pentose metabolic process	45	0	0.06	0.11023
GO:0000105	histidine biosynthetic process	16	0	0.02	0.11272
GO:0052803	imidazole-containing compound metabolic process	16	0	0.02	0.11272
GO:0006547	histidine metabolic process	16	0	0.02	0.11272
GO:0070534	protein K63-linked ubiquitination	10	0	0.01	0.11307
GO:0043091	L-arginine import	10	0	0.01	0.11316
GO:0043092	L-amino acid import	10	0	0.01	0.11316
GO:0090467	arginine import	10	0	0.01	0.11316
GO:1902023	L-arginine transport	10	0	0.01	0.11316
GO:0015809	arginine transport	10	0	0.01	0.11316
GO:0042545	cell wall modification	123	0	0.17	0.11316
GO:2001293	malonyl-CoA metabolic process	27	0	0.04	0.11373
GO:0031023	microtubule organizing center organization	26	0	0.04	0.1141
GO:0015695	organic cation transport	18	0	0.02	0.11437
GO:0050777	negative regulation of immune response	11	0	0.02	0.11464
GO:0045824	negative regulation of innate immune response	11	0	0.02	0.11464
GO:0007166	cell surface receptor signaling pathway	128	1	0.18	0.11544
GO:0048528	post-embryonic root development	41	0	0.06	0.11559
GO:0051301	cell division	433	0	0.6	0.11646
GO:0046496	nicotinamide nucleotide metabolic process	75	0	0.1	0.11658
GO:0030837	negative regulation of actin filament polymerization	13	0	0.02	0.11728
GO:0032272	negative regulation of protein polymerization	13	0	0.02	0.11728
GO:0031333	negative regulation of protein complex assembly	13	0	0.02	0.11728
GO:0051494	negative regulation of cytoskeleton organization	13	0	0.02	0.11728
GO:0009201	ribonucleoside triphosphate biosynthetic process	257	1	0.36	0.11767
GO:0010218	response to far red light	9	0	0.01	0.11837
GO:1902358	sulfate transmembrane transport	29	1	0.04	0.1196
GO:0031086	nuclear-transcribed mRNA catabolic process, deadenylation-independent decay	9	0	0.01	0.12012
GO:0031087	deadenylation-independent decapping of nuclear-transcribed mRNA	9	0	0.01	0.12012
GO:0006301	postreplication repair	20	0	0.03	0.12016
GO:0031221	arabinan metabolic process	16	1	0.02	0.12089
GO:0031222	arabinan catabolic process	16	1	0.02	0.12089
GO:0051513	regulation of monopolar cell growth	7	0	0.01	0.12132
GO:0009639	response to red or far red light	79	0	0.11	0.12137
GO:0016032	viral process	28	0	0.04	0.1218
GO:0019720	Mo-molybdopterin cofactor metabolic process	12	0	0.02	0.12254
GO:0006777	Mo-molybdopterin cofactor biosynthetic process	12	0	0.02	0.12254
GO:0006464	cellular protein modification process	3653	3	5.05	0.12401
GO:0036211	protein modification process	3653	3	5.05	0.12401
GO:0010101	post-embryonic root morphogenesis	28	0	0.04	0.1244
GO:0010102	lateral root morphogenesis	28	0	0.04	0.1244
GO:0010374	stomatal complex development	33	1	0.05	0.12456
GO:0090558	plant epidermis development	33	1	0.05	0.12456
GO:0046474	glycerophospholipid biosynthetic process	79	0	0.11	0.12581
GO:0009142	nucleoside triphosphate biosynthetic process	264	1	0.36	0.12582
GO:0034030	ribonucleoside bisphosphate biosynthetic process	34	0	0.05	0.12608
GO:0034033	purine nucleoside bisphosphate biosynthetic process	34	0	0.05	0.12608
GO:0033866	nucleoside bisphosphate biosynthetic process	34	0	0.05	0.12608
GO:0015937	coenzyme A biosynthetic process	34	0	0.05	0.12608
GO:0009769	photosynthesis, light harvesting in photosystem II	16	0	0.02	0.12618
GO:0090407	organophosphate biosynthetic process	627	1	0.87	0.12914
GO:0072583	clathrin-mediated endocytosis	13	0	0.02	0.12942
GO:0034654	nucleobase-containing compound biosynthetic process	3120	4	4.31	0.12969
GO:0006526	arginine biosynthetic process	23	0	0.03	0.13022
GO:0071426	ribonucleoprotein complex export from nucleus	15	0	0.02	0.13101
GO:0071166	ribonucleoprotein complex localization	15	0	0.02	0.13101
GO:0017006	protein-tetrapyrrole linkage	16	0	0.02	0.13155
GO:0045488	pectin metabolic process	193	0	0.27	0.13168
GO:0010393	galacturonan metabolic process	193	0	0.27	0.13168
GO:0008535	respiratory chain complex IV assembly	14	0	0.02	0.13175
GO:0016114	terpenoid biosynthetic process	138	0	0.19	0.13186
GO:0006072	glycerol-3-phosphate metabolic process	12	0	0.02	0.13337
GO:0009088	threonine biosynthetic process	8	0	0.01	0.13346
GO:1902586	multi-organism intercellular transport	8	0	0.01	0.1338
GO:0046740	transport of virus in host, cell to cell	8	0	0.01	0.1338
GO:0000413	protein peptidyl-prolyl isomerization	103	0	0.14	0.13531
GO:0007389	pattern specification process	109	0	0.15	0.1355
GO:0009162	deoxyribonucleoside monophosphate metabolic process	11	0	0.02	0.13558
GO:0009157	deoxyribonucleoside monophosphate biosynthetic process	11	0	0.02	0.13558
GO:0043436	oxoacid metabolic process	1837	3	2.54	0.13577
GO:0042435	indole-containing compound biosynthetic process	37	0	0.05	0.1358
GO:0019362	pyridine nucleotide metabolic process	76	0	0.1	0.13748
GO:0006379	mRNA cleavage	15	0	0.02	0.13809
GO:1901135	carbohydrate derivative metabolic process	1298	2	1.79	0.13874
GO:0051641	cellular localization	1171	0	1.62	0.1391
GO:0006351	transcription, DNA-templated	2543	3	3.51	0.13964
GO:0006525	arginine metabolic process	33	0	0.05	0.14088
GO:0006576	cellular biogenic amine metabolic process	124	0	0.17	0.14093
GO:0042822	pyridoxal phosphate metabolic process	13	0	0.02	0.14097
GO:0042823	pyridoxal phosphate biosynthetic process	13	0	0.02	0.14097
GO:0006082	organic acid metabolic process	1843	3	2.55	0.14147
GO:0000023	maltose metabolic process	9	0	0.01	0.14164
GO:0010588	cotyledon vascular tissue pattern formation	8	0	0.01	0.14219
GO:0033617	mitochondrial respiratory chain complex IV assembly	12	0	0.02	0.14227
GO:0006431	methionyl-tRNA aminoacylation	10	0	0.01	0.14235
GO:0034427	nuclear-transcribed mRNA catabolic process, exonucleolytic, 3'-5'	14	0	0.02	0.14262
GO:0006605	protein targeting	321	0	0.44	0.14268
GO:0044273	sulfur compound catabolic process	21	0	0.03	0.14357
GO:0006014	D-ribose metabolic process	17	0	0.02	0.1438
GO:0044763	single-organism cellular process	10105	18	13.96	0.14402
GO:0010346	shoot axis formation	18	0	0.02	0.14426
GO:0010223	secondary shoot formation	18	0	0.02	0.14426
GO:0001763	morphogenesis of a branching structure	18	0	0.02	0.14426
GO:0046835	carbohydrate phosphorylation	52	0	0.07	0.14469
GO:0000003	reproduction	214	2	0.3	0.1458
GO:0006721	terpenoid metabolic process	170	0	0.23	0.14678
GO:0032412	regulation of ion transmembrane transporter activity	6	0	0.01	0.14682
GO:0032409	regulation of transporter activity	6	0	0.01	0.14682
GO:0022898	regulation of transmembrane transporter activity	6	0	0.01	0.14682
GO:0042548	regulation of photosynthesis, light reaction	20	0	0.03	0.14698
GO:0043467	regulation of generation of precursor metabolites and energy	20	0	0.03	0.14698
GO:0000162	tryptophan biosynthetic process	30	0	0.04	0.14732
GO:0046219	indolalkylamine biosynthetic process	30	0	0.04	0.14732
GO:0006112	energy reserve metabolic process	36	0	0.05	0.14798
GO:0005977	glycogen metabolic process	36	0	0.05	0.14798
GO:0071918	urea transmembrane transport	7	0	0.01	0.14836
GO:0015840	urea transport	7	0	0.01	0.14836
GO:1901566	organonitrogen compound biosynthetic process	1103	3	1.52	0.14874
GO:0034063	stress granule assembly	7	0	0.01	0.14874
GO:0035674	tricarboxylic acid transmembrane transport	9	0	0.01	0.14885
GO:0051054	positive regulation of DNA metabolic process	7	0	0.01	0.14972
GO:1901576	organic substance biosynthetic process	7207	7	9.96	0.14986
GO:0006825	copper ion transport	22	1	0.03	0.15008
GO:0019637	organophosphate metabolic process	1317	1	1.82	0.15023
GO:0051321	meiotic cell cycle	104	0	0.14	0.15036
GO:0032774	RNA biosynthetic process	2556	3	3.53	0.15038
GO:0044271	cellular nitrogen compound biosynthetic process	3420	5	4.72	0.15103
GO:0007127	meiosis I	50	0	0.07	0.1517
GO:1902475	L-alpha-amino acid transmembrane transport	19	0	0.03	0.15173
GO:0040011	locomotion	18	0	0.02	0.15244
GO:0070271	protein complex biogenesis	591	0	0.82	0.15246
GO:0042454	ribonucleoside catabolic process	135	0	0.19	0.1529
GO:0016998	cell wall macromolecule catabolic process	43	1	0.06	0.15387
GO:0006970	response to osmotic stress	187	0	0.26	0.15389
GO:0009064	glutamine family amino acid metabolic process	128	2	0.18	0.15454
GO:0046323	glucose import	50	0	0.07	0.15538
GO:0015758	glucose transport	50	0	0.07	0.15538
GO:0006119	oxidative phosphorylation	204	0	0.28	0.1554
GO:0009071	serine family amino acid catabolic process	17	0	0.02	0.15544
GO:0009826	unidimensional cell growth	102	0	0.14	0.15561
GO:0071840	cellular component organization or biogenesis	3580	1	4.95	0.15589
GO:0009888	tissue development	263	1	0.36	0.15599
GO:0071822	protein complex subunit organization	730	0	1.01	0.15732
GO:0044710	single-organism metabolic process	7870	12	10.87	0.15737
GO:0006461	protein complex assembly	589	0	0.81	0.15752
GO:0042278	purine nucleoside metabolic process	726	1	1	0.15798
GO:0019509	L-methionine biosynthetic process from methylthioadenosine	17	0	0.02	0.1581
GO:0071267	L-methionine salvage	17	0	0.02	0.1581
GO:0043102	amino acid salvage	17	0	0.02	0.1581
GO:0033238	regulation of cellular amine metabolic process	18	0	0.02	0.15866
GO:0006521	regulation of cellular amino acid metabolic process	18	0	0.02	0.15866
GO:0051123	RNA polymerase II transcriptional preinitiation complex assembly	42	0	0.06	0.15883
GO:0015711	organic anion transport	283	0	0.39	0.15942
GO:0000054	ribosomal subunit export from nucleus	13	0	0.02	0.16018
GO:0033750	ribosome localization	13	0	0.02	0.16018
GO:0033753	establishment of ribosome localization	13	0	0.02	0.16018
GO:0071428	rRNA-containing ribonucleoprotein complex export from nucleus	13	0	0.02	0.16018
GO:0071489	cellular response to red or far red light	24	0	0.03	0.16055
GO:0010017	red or far-red light signaling pathway	24	0	0.03	0.16055
GO:0072488	ammonium transmembrane transport	19	0	0.03	0.16135
GO:0009446	putrescine biosynthetic process	19	0	0.03	0.16202
GO:1902582	single-organism intracellular transport	615	0	0.85	0.16252
GO:0044724	single-organism carbohydrate catabolic process	217	1	0.3	0.16293
GO:0009611	response to wounding	58	0	0.08	0.16348
GO:0007052	mitotic spindle organization	36	0	0.05	0.16385
GO:0045292	mRNA cis splicing, via spliceosome	18	0	0.02	0.16568
GO:0009154	purine ribonucleotide catabolic process	128	0	0.18	0.16609
GO:0009118	regulation of nucleoside metabolic process	128	0	0.18	0.16609
GO:0009261	ribonucleotide catabolic process	128	0	0.18	0.16609
GO:1900542	regulation of purine nucleotide metabolic process	128	0	0.18	0.16609
GO:0009260	ribonucleotide biosynthetic process	358	1	0.49	0.16649
GO:0046390	ribose phosphate biosynthetic process	358	1	0.49	0.16649
GO:0001676	long-chain fatty acid metabolic process	13	0	0.02	0.16661
GO:0046394	carboxylic acid biosynthetic process	775	2	1.07	0.16662
GO:0016053	organic acid biosynthetic process	775	2	1.07	0.16662
GO:0006817	phosphate ion transport	28	0	0.04	0.16669
GO:0006513	protein monoubiquitination	11	0	0.02	0.16669
GO:0051346	negative regulation of hydrolase activity	64	0	0.09	0.16717
GO:0010162	seed dormancy process	22	0	0.03	0.16735
GO:0022611	dormancy process	22	0	0.03	0.16735
GO:0003002	regionalization	91	0	0.13	0.16745
GO:0080154	regulation of fertilization	6	0	0.01	0.16785
GO:0080155	regulation of double fertilization forming a zygote and endosperm	6	0	0.01	0.16785
GO:0035434	copper ion transmembrane transport	17	1	0.02	0.16816
GO:0033554	cellular response to stress	785	5	1.08	0.16816
GO:0006195	purine nucleotide catabolic process	131	0	0.18	0.16903
GO:0000122	negative regulation of transcription from RNA polymerase II promoter	12	0	0.02	0.16909
GO:0010466	negative regulation of peptidase activity	55	0	0.08	0.16917
GO:0052547	regulation of peptidase activity	55	0	0.08	0.16917
GO:0031407	oxylipin metabolic process	35	0	0.05	0.16918
GO:0031408	oxylipin biosynthetic process	35	0	0.05	0.16918
GO:0044085	cellular component biogenesis	1695	0	2.34	0.1714
GO:0090150	establishment of protein localization to membrane	85	0	0.12	0.17173
GO:0072657	protein localization to membrane	85	0	0.12	0.17173
GO:0006120	mitochondrial electron transport, NADH to ubiquinone	20	0	0.03	0.17183
GO:0048589	developmental growth	149	0	0.21	0.1721
GO:2001295	malonyl-CoA biosynthetic process	26	0	0.04	0.17348
GO:0042549	photosystem II stabilization	7	0	0.01	0.17441
GO:0009058	biosynthetic process	7617	8	10.52	0.17467
GO:0009099	valine biosynthetic process	11	0	0.02	0.17516
GO:0070646	protein modification by small protein removal	101	0	0.14	0.17546
GO:0045493	xylan catabolic process	19	1	0.03	0.1755
GO:0072594	establishment of protein localization to organelle	309	0	0.43	0.17651
GO:0006560	proline metabolic process	21	1	0.03	0.17779
GO:0010267	production of ta-siRNAs involved in RNA interference	12	0	0.02	0.17781
GO:0072521	purine-containing compound metabolic process	797	1	1.1	0.17814
GO:0030811	regulation of nucleotide catabolic process	127	0	0.18	0.1783
GO:0009203	ribonucleoside triphosphate catabolic process	127	0	0.18	0.1783
GO:0009207	purine ribonucleoside triphosphate catabolic process	127	0	0.18	0.1783
GO:0033121	regulation of purine nucleotide catabolic process	127	0	0.18	0.1783
GO:0031647	regulation of protein stability	13	0	0.02	0.17833
GO:0050821	protein stabilization	13	0	0.02	0.17833
GO:0006661	phosphatidylinositol biosynthetic process	47	0	0.06	0.17863
GO:0006624	vacuolar protein processing	15	0	0.02	0.17869
GO:0007020	microtubule nucleation	21	0	0.03	0.17873
GO:0031109	microtubule polymerization or depolymerization	21	0	0.03	0.17873
GO:0046785	microtubule polymerization	21	0	0.03	0.17873
GO:0032324	molybdopterin cofactor biosynthetic process	13	0	0.02	0.17886
GO:0043545	molybdopterin cofactor metabolic process	13	0	0.02	0.17886
GO:0051189	prosthetic group metabolic process	13	0	0.02	0.17886
GO:0048193	Golgi vesicle transport	190	0	0.26	0.17892
GO:1901292	nucleoside phosphate catabolic process	141	0	0.19	0.17943
GO:0045727	positive regulation of translation	48	0	0.07	0.18017
GO:0022613	ribonucleoprotein complex biogenesis	755	0	1.04	0.18045
GO:0012501	programmed cell death	92	4	0.13	0.18046
GO:0051938	L-glutamate import	9	0	0.01	0.18163
GO:0015813	L-glutamate transport	9	0	0.01	0.18163
GO:0015800	acidic amino acid transport	9	0	0.01	0.18163
GO:0051345	positive regulation of hydrolase activity	123	0	0.17	0.18216
GO:1901657	glycosyl compound metabolic process	853	1	1.18	0.18244
GO:2000756	regulation of peptidyl-lysine acetylation	23	0	0.03	0.18311
GO:1901983	regulation of protein acetylation	23	0	0.03	0.18311
GO:0035065	regulation of histone acetylation	23	0	0.03	0.18311
GO:0046130	purine ribonucleoside catabolic process	132	0	0.18	0.18314
GO:0072337	modified amino acid transport	6	0	0.01	0.1833
GO:0022406	membrane docking	96	0	0.13	0.18356
GO:0042180	cellular ketone metabolic process	77	0	0.11	0.18557
GO:0043244	regulation of protein complex disassembly	14	0	0.02	0.18645
GO:0009146	purine nucleoside triphosphate catabolic process	130	0	0.18	0.18742
GO:0006140	regulation of nucleotide metabolic process	130	0	0.18	0.18742
GO:0033044	regulation of chromosome organization	43	0	0.06	0.18776
GO:0009880	embryonic pattern specification	16	0	0.02	0.18826
GO:0016579	protein deubiquitination	81	0	0.11	0.18859
GO:0015992	proton transport	545	1	0.75	0.18916
GO:0006818	hydrogen transport	545	1	0.75	0.18916
GO:0010206	photosystem II repair	21	0	0.03	0.18928
GO:0035967	cellular response to topologically incorrect protein	12	0	0.02	0.18973
GO:0009119	ribonucleoside metabolic process	770	1	1.06	0.18975
GO:0009956	radial pattern formation	13	0	0.02	0.18975
GO:0044249	cellular biosynthetic process	6860	6	9.48	0.18976
GO:0000103	sulfate assimilation	67	0	0.09	0.19054
GO:0051262	protein tetramerization	8	0	0.01	0.19146
GO:0000387	spliceosomal snRNP assembly	39	0	0.05	0.19208
GO:1902850	microtubule cytoskeleton organization involved in mitosis	18	0	0.02	0.19225
GO:0034497	protein localization to pre-autophagosomal structure	9	0	0.01	0.19267
GO:1902222	erythrose 4-phosphate/phosphoenolpyruvate family amino acid catabolic process	22	0	0.03	0.19392
GO:0006559	L-phenylalanine catabolic process	22	0	0.03	0.19392
GO:0010027	thylakoid membrane organization	37	0	0.05	0.19393
GO:0009668	plastid membrane organization	37	0	0.05	0.19393
GO:0009942	longitudinal axis specification	9	0	0.01	0.19453
GO:0000578	embryonic axis specification	9	0	0.01	0.19453
GO:0018208	peptidyl-proline modification	106	0	0.15	0.19505
GO:0034629	cellular protein complex localization	20	0	0.03	0.19562
GO:0031503	protein complex localization	20	0	0.03	0.19562
GO:0046434	organophosphate catabolic process	177	0	0.24	0.19562
GO:0019438	aromatic compound biosynthetic process	3517	4	4.86	0.19582
GO:0009141	nucleoside triphosphate metabolic process	622	1	0.86	0.19649
GO:0042742	defense response to bacterium	101	0	0.14	0.19654
GO:0031627	telomeric loop formation	18	0	0.02	0.19691
GO:0006426	glycyl-tRNA aminoacylation	6	0	0.01	0.19744
GO:2000034	regulation of seed maturation	14	0	0.02	0.19811
GO:0006813	potassium ion transport	134	0	0.19	0.19829
GO:0042450	arginine biosynthetic process via ornithine	7	0	0.01	0.19963
GO:0071265	L-methionine biosynthetic process	20	0	0.03	0.20008
GO:0000098	sulfur amino acid catabolic process	6	0	0.01	0.20033
GO:0048569	post-embryonic organ development	136	0	0.19	0.20139
GO:0044764	multi-organism cellular process	40	0	0.06	0.20181
GO:0009739	response to gibberellin	50	0	0.07	0.20381
GO:0043085	positive regulation of catalytic activity	204	0	0.28	0.20416
GO:0044093	positive regulation of molecular function	204	0	0.28	0.20416
GO:0016043	cellular component organization	3095	1	4.28	0.20424
GO:0019740	nitrogen utilization	17	0	0.02	0.20469
GO:0048527	lateral root development	37	0	0.05	0.20487
GO:0009143	nucleoside triphosphate catabolic process	135	0	0.19	0.20493
GO:0046036	CTP metabolic process	29	0	0.04	0.20507
GO:0006241	CTP biosynthetic process	29	0	0.04	0.20507
GO:0008652	cellular amino acid biosynthetic process	420	2	0.58	0.20552
GO:0045898	regulation of RNA polymerase II transcriptional preinitiation complex assembly	33	0	0.05	0.20581
GO:0045899	positive regulation of RNA polymerase II transcriptional preinitiation complex assembly	33	0	0.05	0.20581
GO:0009247	glycolipid biosynthetic process	57	0	0.08	0.20632
GO:0007126	meiotic nuclear division	82	0	0.11	0.20689
GO:0035999	tetrahydrofolate interconversion	27	0	0.04	0.20749
GO:0006468	protein phosphorylation	1823	2	2.52	0.20806
GO:0010114	response to red light	7	0	0.01	0.20926
GO:0000042	protein targeting to Golgi	7	0	0.01	0.21068
GO:0072600	establishment of protein localization to Golgi	7	0	0.01	0.21068
GO:0043289	apocarotenoid biosynthetic process	9	0	0.01	0.2111
GO:0018193	peptidyl-amino acid modification	512	0	0.71	0.21182
GO:0016265	death	116	4	0.16	0.21243
GO:0008219	cell death	116	4	0.16	0.21243
GO:0052646	alditol phosphate metabolic process	15	0	0.02	0.21394
GO:0000422	mitochondrion degradation	14	0	0.02	0.21422
GO:0030641	regulation of cellular pH	48	0	0.07	0.21455
GO:0051453	regulation of intracellular pH	48	0	0.07	0.21455
GO:0006268	DNA unwinding involved in DNA replication	11	0	0.02	0.21487
GO:0009166	nucleotide catabolic process	138	0	0.19	0.21558
GO:0043547	positive regulation of GTPase activity	116	0	0.16	0.21586
GO:0048729	tissue morphogenesis	6	0	0.01	0.21643
GO:0002009	morphogenesis of an epithelium	6	0	0.01	0.21643
GO:0001736	establishment of planar polarity	6	0	0.01	0.21643
GO:0001738	morphogenesis of a polarized epithelium	6	0	0.01	0.21643
GO:0007164	establishment of tissue polarity	6	0	0.01	0.21643
GO:0009265	2'-deoxyribonucleotide biosynthetic process	9	0	0.01	0.21719
GO:0009221	pyrimidine deoxyribonucleotide biosynthetic process	9	0	0.01	0.21719
GO:0009219	pyrimidine deoxyribonucleotide metabolic process	9	0	0.01	0.21719
GO:0046385	deoxyribose phosphate biosynthetic process	9	0	0.01	0.21719
GO:0080140	regulation of jasmonic acid metabolic process	6	0	0.01	0.21757
GO:0080141	regulation of jasmonic acid biosynthetic process	6	0	0.01	0.21757
GO:0006996	organelle organization	1710	0	2.36	0.21789
GO:0006928	cellular component movement	110	0	0.15	0.21806
GO:0007018	microtubule-based movement	110	0	0.15	0.21806
GO:0009161	ribonucleoside monophosphate metabolic process	535	1	0.74	0.21929
GO:0000018	regulation of DNA recombination	8	0	0.01	0.21943
GO:0030865	cortical cytoskeleton organization	8	0	0.01	0.2195
GO:0010310	regulation of hydrogen peroxide metabolic process	6	0	0.01	0.21958
GO:0009836	fruit ripening, climacteric	6	0	0.01	0.22015
GO:0045132	meiotic chromosome segregation	24	0	0.03	0.22024
GO:0009658	chloroplast organization	162	0	0.22	0.22033
GO:0006491	N-glycan processing	16	0	0.02	0.2206
GO:0009625	response to insect	7	0	0.01	0.22229
GO:0002213	defense response to insect	7	0	0.01	0.22229
GO:0098655	cation transmembrane transport	764	2	1.06	0.22253
GO:0007131	reciprocal meiotic recombination	41	0	0.06	0.22263
GO:0035825	reciprocal DNA recombination	41	0	0.06	0.22263
GO:0070897	DNA-templated transcriptional preinitiation complex assembly	43	0	0.06	0.22383
GO:0006796	phosphate-containing compound metabolic process	4138	6	5.72	0.22388
GO:0045454	cell redox homeostasis	219	0	0.3	0.22427
GO:0051241	negative regulation of multicellular organismal process	54	0	0.07	0.22483
GO:0009116	nucleoside metabolic process	808	1	1.12	0.22537
GO:0042218	1-aminocyclopropane-1-carboxylate biosynthetic process	29	0	0.04	0.2255
GO:0018871	1-aminocyclopropane-1-carboxylate metabolic process	29	0	0.04	0.2255
GO:0009445	putrescine metabolic process	20	0	0.03	0.22702
GO:2000022	regulation of jasmonic acid mediated signaling pathway	17	0	0.02	0.22739
GO:0010252	auxin homeostasis	20	0	0.03	0.22741
GO:0034599	cellular response to oxidative stress	274	1	0.38	0.22809
GO:0043623	cellular protein complex assembly	392	0	0.54	0.22811
GO:0006767	water-soluble vitamin metabolic process	65	0	0.09	0.22853
GO:0042372	phylloquinone biosynthetic process	6	0	0.01	0.22913
GO:0042374	phylloquinone metabolic process	6	0	0.01	0.22913
GO:0010193	response to ozone	6	0	0.01	0.2292
GO:0042391	regulation of membrane potential	64	0	0.09	0.22939
GO:0010075	regulation of meristem growth	21	0	0.03	0.22948
GO:0042546	cell wall biogenesis	185	0	0.26	0.22989
GO:0090307	spindle assembly involved in mitosis	16	0	0.02	0.23093
GO:0051415	interphase microtubule nucleation by interphase microtubule organizing center	16	0	0.02	0.23093
GO:0051418	microtubule nucleation by microtubule organizing center	16	0	0.02	0.23093
GO:0051298	centrosome duplication	16	0	0.02	0.23093
GO:0019252	starch biosynthetic process	32	0	0.04	0.23108
GO:1902580	single-organism cellular localization	127	0	0.18	0.23141
GO:1902578	single-organism localization	127	0	0.18	0.23141
GO:0008544	epidermis development	107	1	0.15	0.23182
GO:0043588	skin development	107	1	0.15	0.23182
GO:0060429	epithelium development	107	1	0.15	0.23182
GO:0016071	mRNA metabolic process	517	0	0.71	0.23263
GO:0006885	regulation of pH	81	0	0.11	0.23266
GO:0034227	tRNA thio-modification	10	0	0.01	0.23271
GO:0034475	U4 snRNA 3'-end processing	11	0	0.02	0.23325
GO:0006346	methylation-dependent chromatin silencing	9	0	0.01	0.23328
GO:0019755	one-carbon compound transport	12	0	0.02	0.23357
GO:0015991	ATP hydrolysis coupled proton transport	160	1	0.22	0.23384
GO:0015988	energy coupled proton transmembrane transport, against electrochemical gradient	160	1	0.22	0.23384
GO:0070988	demethylation	11	0	0.02	0.23406
GO:0000394	RNA splicing, via endonucleolytic cleavage and ligation	18	0	0.02	0.23412
GO:0006568	tryptophan metabolic process	41	0	0.06	0.23438
GO:0006586	indolalkylamine metabolic process	41	0	0.06	0.23438
GO:0015749	monosaccharide transport	54	0	0.07	0.23557
GO:0009176	pyrimidine deoxyribonucleoside monophosphate metabolic process	6	0	0.01	0.23615
GO:0009177	pyrimidine deoxyribonucleoside monophosphate biosynthetic process	6	0	0.01	0.23615
GO:0034976	response to endoplasmic reticulum stress	30	0	0.04	0.23621
GO:0042430	indole-containing compound metabolic process	60	0	0.08	0.23684
GO:0015980	energy derivation by oxidation of organic compounds	373	0	0.52	0.23712
GO:0009205	purine ribonucleoside triphosphate metabolic process	589	1	0.81	0.23793
GO:0071483	cellular response to blue light	9	0	0.01	0.23795
GO:0030522	intracellular receptor signaling pathway	9	0	0.01	0.23795
GO:0009785	blue light signaling pathway	9	0	0.01	0.23795
GO:0010412	mannan metabolic process	25	0	0.03	0.238
GO:0046355	mannan catabolic process	25	0	0.03	0.238
GO:0043067	regulation of programmed cell death	38	0	0.05	0.23825
GO:0045017	glycerolipid biosynthetic process	111	0	0.15	0.23874
GO:0006904	vesicle docking involved in exocytosis	38	0	0.05	0.23889
GO:0032506	cytokinetic process	53	0	0.07	0.23967
GO:0000917	barrier septum assembly	9	0	0.01	0.24034
GO:0090529	cell septum assembly	9	0	0.01	0.24034
GO:0043631	RNA polyadenylation	20	0	0.03	0.24036
GO:0007215	glutamate receptor signaling pathway	32	0	0.04	0.24059
GO:0035235	ionotropic glutamate receptor signaling pathway	32	0	0.04	0.24059
GO:0009144	purine nucleoside triphosphate metabolic process	592	1	0.82	0.24088
GO:0000302	response to reactive oxygen species	240	1	0.33	0.24115
GO:0006829	zinc ion transport	50	0	0.07	0.24234
GO:0060560	developmental growth involved in morphogenesis	113	0	0.16	0.24254
GO:0033385	geranylgeranyl diphosphate metabolic process	9	0	0.01	0.24259
GO:0000280	nuclear division	155	0	0.21	0.24317
GO:0032147	activation of protein kinase activity	37	0	0.05	0.24385
GO:0046039	GTP metabolic process	134	0	0.19	0.24409
GO:0009725	response to hormone	977	0	1.35	0.24488
GO:0051225	spindle assembly	30	0	0.04	0.24541
GO:1901069	guanosine-containing compound catabolic process	121	0	0.17	0.24571
GO:0043087	regulation of GTPase activity	121	0	0.17	0.24571
GO:0006184	GTP catabolic process	121	0	0.17	0.24571
GO:0033124	regulation of GTP catabolic process	121	0	0.17	0.24571
GO:0051156	glucose 6-phosphate metabolic process	11	0	0.02	0.2459
GO:0051493	regulation of cytoskeleton organization	47	0	0.06	0.24592
GO:0045860	positive regulation of protein kinase activity	48	0	0.07	0.24619
GO:0033674	positive regulation of kinase activity	48	0	0.07	0.24619
GO:1901658	glycosyl compound catabolic process	148	0	0.2	0.24719
GO:1901362	organic cyclic compound biosynthetic process	3680	5	5.08	0.24748
GO:0043171	peptide catabolic process	14	0	0.02	0.24811
GO:0009303	rRNA transcription	6	0	0.01	0.2485
GO:2000278	regulation of DNA biosynthetic process	8	0	0.01	0.2487
GO:0051972	regulation of telomerase activity	8	0	0.01	0.2487
GO:0051974	negative regulation of telomerase activity	8	0	0.01	0.2487
GO:0032204	regulation of telomere maintenance	8	0	0.01	0.2487
GO:0048278	vesicle docking	89	0	0.12	0.24943
GO:0009719	response to endogenous stimulus	980	0	1.35	0.24956
GO:0002239	response to oomycetes	13	0	0.02	0.25034
GO:0045087	innate immune response	147	4	0.2	0.25134
GO:0000478	endonucleolytic cleavage involved in rRNA processing	19	0	0.03	0.25273
GO:0000479	endonucleolytic cleavage of tricistronic rRNA transcript (SSU-rRNA, 5.8S rRNA, LSU-rRNA)	19	0	0.03	0.25273
GO:0009816	defense response to bacterium, incompatible interaction	14	0	0.02	0.25275
GO:0015696	ammonium transport	21	0	0.03	0.25275
GO:0018196	peptidyl-asparagine modification	17	0	0.02	0.25287
GO:0018279	protein N-linked glycosylation via asparagine	17	0	0.02	0.25287
GO:0044036	cell wall macromolecule metabolic process	167	2	0.23	0.25333
GO:0022900	electron transport chain	403	0	0.56	0.25379
GO:0009937	regulation of gibberellic acid mediated signaling pathway	16	0	0.02	0.25392
GO:0006644	phospholipid metabolic process	252	0	0.35	0.25458
GO:0030154	cell differentiation	253	0	0.35	0.25509
GO:0097034	mitochondrial respiratory chain complex IV biogenesis	14	0	0.02	0.2554
GO:0006743	ubiquinone metabolic process	19	0	0.03	0.2564
GO:0006744	ubiquinone biosynthetic process	19	0	0.03	0.2564
GO:0009394	2'-deoxyribonucleotide metabolic process	12	0	0.02	0.25656
GO:0019692	deoxyribose phosphate metabolic process	12	0	0.02	0.25656
GO:0009200	deoxyribonucleoside triphosphate metabolic process	12	0	0.02	0.25656
GO:0007067	mitotic nuclear division	95	0	0.13	0.25677
GO:0043412	macromolecule modification	3928	3	5.43	0.25707
GO:0043090	amino acid import	16	0	0.02	0.25905
GO:1902047	polyamine transmembrane transport	7	0	0.01	0.25949
GO:2000762	regulation of phenylpropanoid metabolic process	6	0	0.01	0.26077
GO:0042743	hydrogen peroxide metabolic process	181	1	0.25	0.26158
GO:0031057	negative regulation of histone modification	13	0	0.02	0.26171
GO:2000757	negative regulation of peptidyl-lysine acetylation	13	0	0.02	0.26171
GO:1901984	negative regulation of protein acetylation	13	0	0.02	0.26171
GO:0035067	negative regulation of histone acetylation	13	0	0.02	0.26171
GO:1903309	negative regulation of chromatin modification	13	0	0.02	0.26171
GO:0006487	protein N-linked glycosylation	57	0	0.08	0.26283
GO:0006212	uracil catabolic process	6	0	0.01	0.26433
GO:0006208	pyrimidine nucleobase catabolic process	6	0	0.01	0.26433
GO:0022904	respiratory electron transport chain	202	0	0.28	0.26463
GO:0009809	lignin biosynthetic process	49	0	0.07	0.26463
GO:0009211	pyrimidine deoxyribonucleoside triphosphate metabolic process	7	0	0.01	0.26481
GO:0006900	membrane budding	52	0	0.07	0.26664
GO:0010304	PSII associated light-harvesting complex II catabolic process	16	0	0.02	0.26776
GO:0051179	localization	4508	8	6.23	0.26785
GO:0006527	arginine catabolic process	6	0	0.01	0.26856
GO:1900109	regulation of histone H3-K9 dimethylation	6	0	0.01	0.26889
GO:0051574	positive regulation of histone H3-K9 methylation	6	0	0.01	0.26889
GO:0031062	positive regulation of histone methylation	6	0	0.01	0.26889
GO:0018027	peptidyl-lysine dimethylation	6	0	0.01	0.26889
GO:0036123	histone H3-K9 dimethylation	6	0	0.01	0.26889
GO:1900111	positive regulation of histone H3-K9 dimethylation	6	0	0.01	0.26889
GO:0046184	aldehyde biosynthetic process	18	0	0.02	0.26921
GO:0002683	negative regulation of immune system process	14	0	0.02	0.26962
GO:0034220	ion transmembrane transport	1090	4	1.51	0.27092
GO:0019058	viral life cycle	13	0	0.02	0.27099
GO:0019079	viral genome replication	13	0	0.02	0.27099
GO:0046786	viral replication complex formation and maintenance	13	0	0.02	0.27099
GO:0022411	cellular component disassembly	74	0	0.1	0.27141
GO:0042493	response to drug	133	0	0.18	0.27193
GO:0006855	drug transmembrane transport	133	0	0.18	0.27193
GO:0015893	drug transport	133	0	0.18	0.27193
GO:0044070	regulation of anion transport	7	0	0.01	0.27281
GO:0009959	negative gravitropism	9	0	0.01	0.273
GO:0006302	double-strand break repair	89	0	0.12	0.27385
GO:0006810	transport	4354	8	6.02	0.27469
GO:0015706	nitrate transport	15	0	0.02	0.27482
GO:0072525	pyridine-containing compound biosynthetic process	43	0	0.06	0.27523
GO:0006750	glutathione biosynthetic process	6	0	0.01	0.27558
GO:0019184	nonribosomal peptide biosynthetic process	6	0	0.01	0.27558
GO:0042327	positive regulation of phosphorylation	52	0	0.07	0.27627
GO:0001934	positive regulation of protein phosphorylation	52	0	0.07	0.27627
GO:0010562	positive regulation of phosphorus metabolic process	52	0	0.07	0.27627
GO:0045937	positive regulation of phosphate metabolic process	52	0	0.07	0.27627
GO:0015802	basic amino acid transport	13	0	0.02	0.27646
GO:0006898	receptor-mediated endocytosis	17	0	0.02	0.27648
GO:0071577	zinc ion transmembrane transport	48	0	0.07	0.27654
GO:0006353	DNA-templated transcription, termination	13	0	0.02	0.27715
GO:0046907	intracellular transport	874	0	1.21	0.27776
GO:1901607	alpha-amino acid biosynthetic process	342	2	0.47	0.27798
GO:0044205	'de novo' UMP biosynthetic process	7	0	0.01	0.27859
GO:0009856	pollination	130	0	0.18	0.27935
GO:0044706	multi-multicellular organism process	130	0	0.18	0.27935
GO:0048609	multicellular organismal reproductive process	70	1	0.1	0.27988
GO:0009310	amine catabolic process	11	0	0.02	0.28039
GO:0042402	cellular biogenic amine catabolic process	11	0	0.02	0.28039
GO:0032984	macromolecular complex disassembly	73	0	0.1	0.28048
GO:0042593	glucose homeostasis	12	0	0.02	0.28159
GO:0001678	cellular glucose homeostasis	12	0	0.02	0.28159
GO:0006612	protein targeting to membrane	42	0	0.06	0.28536
GO:1902456	regulation of stomatal opening	10	0	0.01	0.28541
GO:1990069	stomatal opening	10	0	0.01	0.28541
GO:0030166	proteoglycan biosynthetic process	8	0	0.01	0.2859
GO:0030201	heparan sulfate proteoglycan metabolic process	8	0	0.01	0.2859
GO:0015012	heparan sulfate proteoglycan biosynthetic process	8	0	0.01	0.2859
GO:0009886	post-embryonic morphogenesis	79	1	0.11	0.28628
GO:0032447	protein urmylation	7	0	0.01	0.28711
GO:0042814	monopolar cell growth	10	0	0.01	0.2873
GO:0000055	ribosomal large subunit export from nucleus	7	0	0.01	0.28761
GO:0010053	root epidermal cell differentiation	35	0	0.05	0.28763
GO:1901068	guanosine-containing compound metabolic process	161	0	0.22	0.28781
GO:0043572	plastid fission	28	0	0.04	0.28802
GO:0010020	chloroplast fission	28	0	0.04	0.28802
GO:0006376	mRNA splice site selection	13	0	0.02	0.2884
GO:0008299	isoprenoid biosynthetic process	198	0	0.27	0.28861
GO:0046621	negative regulation of organ growth	9	0	0.01	0.28874
GO:0043269	regulation of ion transport	22	0	0.03	0.28919
GO:1901071	glucosamine-containing compound metabolic process	39	1	0.05	0.28923
GO:1901072	glucosamine-containing compound catabolic process	39	1	0.05	0.28923
GO:0046348	amino sugar catabolic process	39	1	0.05	0.28923
GO:0006026	aminoglycan catabolic process	39	1	0.05	0.28923
GO:0006030	chitin metabolic process	39	1	0.05	0.28923
GO:0006032	chitin catabolic process	39	1	0.05	0.28923
GO:0000041	transition metal ion transport	101	1	0.14	0.28927
GO:0042908	xenobiotic transport	9	0	0.01	0.28951
GO:0042126	nitrate metabolic process	8	0	0.01	0.28972
GO:0042128	nitrate assimilation	8	0	0.01	0.28972
GO:2001057	reactive nitrogen species metabolic process	8	0	0.01	0.28972
GO:0035266	meristem growth	28	0	0.04	0.29042
GO:0005976	polysaccharide metabolic process	635	3	0.88	0.29096
GO:0042158	lipoprotein biosynthetic process	60	0	0.08	0.29157
GO:0006497	protein lipidation	60	0	0.08	0.29157
GO:0006573	valine metabolic process	17	0	0.02	0.29173
GO:0019217	regulation of fatty acid metabolic process	15	0	0.02	0.29287
GO:0044765	single-organism transport	3351	8	4.63	0.29331
GO:0009199	ribonucleoside triphosphate metabolic process	605	1	0.84	0.29378
GO:0006955	immune response	151	4	0.21	0.29417
GO:0000956	nuclear-transcribed mRNA catabolic process	90	0	0.12	0.29529
GO:0006998	nuclear envelope organization	7	0	0.01	0.2964
GO:0031468	nuclear envelope reassembly	7	0	0.01	0.2964
GO:0065002	intracellular protein transmembrane transport	103	0	0.14	0.29676
GO:0051258	protein polymerization	54	0	0.07	0.29741
GO:0071804	cellular potassium ion transport	116	0	0.16	0.29781
GO:0071805	potassium ion transmembrane transport	116	0	0.16	0.29781
GO:0009065	glutamine family amino acid catabolic process	13	0	0.02	0.29855
GO:0009395	phospholipid catabolic process	21	0	0.03	0.29953
GO:0009696	salicylic acid metabolic process	7	0	0.01	0.30053
GO:0046467	membrane lipid biosynthetic process	72	0	0.1	0.30073
GO:0046471	phosphatidylglycerol metabolic process	10	0	0.01	0.30113
GO:0006655	phosphatidylglycerol biosynthetic process	10	0	0.01	0.30113
GO:0031056	regulation of histone modification	30	0	0.04	0.3014
GO:0009853	photorespiration	39	0	0.05	0.30219
GO:0042537	benzene-containing compound metabolic process	32	0	0.04	0.30224
GO:0010345	suberin biosynthetic process	13	0	0.02	0.30335
GO:0006505	GPI anchor metabolic process	38	0	0.05	0.3035
GO:0006506	GPI anchor biosynthetic process	38	0	0.05	0.3035
GO:0009740	gibberellic acid mediated signaling pathway	39	0	0.05	0.30418
GO:0045931	positive regulation of mitotic cell cycle	7	0	0.01	0.30457
GO:0019538	protein metabolic process	6886	3	9.51	0.30521
GO:0006793	phosphorus metabolic process	4177	6	5.77	0.30564
GO:0010388	cullin deneddylation	15	0	0.02	0.30631
GO:0000338	protein deneddylation	15	0	0.02	0.30631
GO:0034655	nucleobase-containing compound catabolic process	299	0	0.41	0.30693
GO:0010033	response to organic substance	1086	0	1.5	0.30726
GO:0046949	fatty-acyl-CoA biosynthetic process	28	0	0.04	0.30777
GO:0008645	hexose transport	52	0	0.07	0.3079
GO:0009567	double fertilization forming a zygote and endosperm	14	0	0.02	0.30826
GO:0010109	regulation of photosynthesis	25	0	0.03	0.30924
GO:0006006	glucose metabolic process	93	0	0.13	0.30933
GO:0072330	monocarboxylic acid biosynthetic process	355	0	0.49	0.30976
GO:0006152	purine nucleoside catabolic process	140	0	0.19	0.30981
GO:0008272	sulfate transport	35	1	0.05	0.30991
GO:0044703	multi-organism reproductive process	181	1	0.25	0.31011
GO:1901293	nucleoside phosphate biosynthetic process	461	1	0.64	0.31026
GO:0051234	establishment of localization	4402	8	6.08	0.31276
GO:0032259	methylation	575	0	0.79	0.31313
GO:0006974	cellular response to DNA damage stimulus	355	0	0.49	0.31331
GO:0046654	tetrahydrofolate biosynthetic process	8	0	0.01	0.31341
GO:0043044	ATP-dependent chromatin remodeling	10	0	0.01	0.31346
GO:0042221	response to chemical	1691	1	2.34	0.31534
GO:0009558	embryo sac cellularization	6	0	0.01	0.31536
GO:0007349	cellularization	6	0	0.01	0.31536
GO:2000242	negative regulation of reproductive process	21	0	0.03	0.31601
GO:0007098	centrosome cycle	20	0	0.03	0.3162
GO:0051297	centrosome organization	20	0	0.03	0.3162
GO:0008295	spermidine biosynthetic process	17	0	0.02	0.31646
GO:0072599	establishment of protein localization to endoplasmic reticulum	32	0	0.04	0.3165
GO:0045047	protein targeting to ER	32	0	0.04	0.3165
GO:0009073	aromatic amino acid family biosynthetic process	76	0	0.1	0.31659
GO:0048364	root development	177	0	0.24	0.31747
GO:0022622	root system development	177	0	0.24	0.31747
GO:2000038	regulation of stomatal complex development	6	0	0.01	0.31753
GO:0070925	organelle assembly	236	0	0.33	0.31761
GO:0031058	positive regulation of histone modification	21	0	0.03	0.31794
GO:1903310	positive regulation of chromatin modification	21	0	0.03	0.31794
GO:0010143	cutin biosynthetic process	27	0	0.04	0.31804
GO:0007051	spindle organization	54	0	0.07	0.31839
GO:0009164	nucleoside catabolic process	143	0	0.2	0.3184
GO:0009259	ribonucleotide metabolic process	731	1	1.01	0.31872
GO:0019693	ribose phosphate metabolic process	731	1	1.01	0.31872
GO:0006753	nucleoside phosphate metabolic process	953	1	1.32	0.31877
GO:0032196	transposition	18	0	0.02	0.31895
GO:0051171	regulation of nitrogen compound metabolic process	2251	3	3.11	0.31906
GO:0019243	methylglyoxal catabolic process to D-lactate	6	0	0.01	0.31934
GO:0006089	lactate metabolic process	6	0	0.01	0.31934
GO:0043241	protein complex disassembly	69	0	0.1	0.31958
GO:0009657	plastid organization	216	0	0.3	0.32007
GO:0042023	DNA endoreduplication	22	0	0.03	0.32024
GO:1901136	carbohydrate derivative catabolic process	212	1	0.29	0.3207
GO:0009813	flavonoid biosynthetic process	229	1	0.32	0.32185
GO:0006450	regulation of translational fidelity	52	0	0.07	0.32249
GO:0009269	response to desiccation	16	0	0.02	0.32303
GO:0048194	Golgi vesicle budding	15	0	0.02	0.32388
GO:0097502	mannosylation	23	0	0.03	0.32388
GO:0048638	regulation of developmental growth	41	0	0.06	0.32395
GO:0005975	carbohydrate metabolic process	1902	8	2.63	0.32428
GO:0051188	cofactor biosynthetic process	271	0	0.37	0.32448
GO:0006886	intracellular protein transport	633	0	0.87	0.32458
GO:0019632	shikimate metabolic process	11	0	0.02	0.32517
GO:0014070	response to organic cyclic compound	144	0	0.2	0.32624
GO:0002128	tRNA nucleoside ribose methylation	6	0	0.01	0.32646
GO:0032787	monocarboxylic acid metabolic process	838	1	1.16	0.32649
GO:0000470	maturation of LSU-rRNA	77	0	0.11	0.32695
GO:0044283	small molecule biosynthetic process	951	2	1.31	0.32737
GO:0048646	anatomical structure formation involved in morphogenesis	122	0	0.17	0.32944
GO:0017148	negative regulation of translation	18	0	0.02	0.32978
GO:0044743	intracellular protein transmembrane import	101	0	0.14	0.3299
GO:0016925	protein sumoylation	24	0	0.03	0.33095
GO:0030198	extracellular matrix organization	43	0	0.06	0.33178
GO:0071668	plant-type cell wall assembly	43	0	0.06	0.33178
GO:0070726	cell wall assembly	43	0	0.06	0.33178
GO:0043062	extracellular structure organization	43	0	0.06	0.33178
GO:0010215	cellulose microfibril organization	43	0	0.06	0.33178
GO:0001666	response to hypoxia	16	0	0.02	0.33182
GO:0036293	response to decreased oxygen levels	16	0	0.02	0.33182
GO:0043328	protein targeting to vacuole involved in ubiquitin-dependent protein catabolic process via the multivesicular body sorting pathway	11	0	0.02	0.33209
GO:0032511	late endosome to vacuole transport via multivesicular body sorting pathway	11	0	0.02	0.33209
GO:0043162	ubiquitin-dependent protein catabolic process via the multivesicular body sorting pathway	11	0	0.02	0.33209
GO:0010941	regulation of cell death	49	0	0.07	0.33215
GO:0009416	response to light stimulus	303	0	0.42	0.33269
GO:0034308	primary alcohol metabolic process	11	0	0.02	0.33355
GO:0008284	positive regulation of cell proliferation	13	0	0.02	0.33359
GO:1902275	regulation of chromatin organization	32	0	0.04	0.33364
GO:1903308	regulation of chromatin modification	32	0	0.04	0.33364
GO:0009590	detection of gravity	6	0	0.01	0.33422
GO:0016310	phosphorylation	2646	4	3.66	0.33473
GO:0097031	mitochondrial respiratory chain complex I biogenesis	9	0	0.01	0.3348
GO:0015716	organic phosphonate transport	7	0	0.01	0.335
GO:0034067	protein localization to Golgi apparatus	10	0	0.01	0.33597
GO:0010410	hemicellulose metabolic process	113	1	0.16	0.33601
GO:0055067	monovalent inorganic cation homeostasis	93	0	0.13	0.33605
GO:0006914	autophagy	71	0	0.1	0.33701
GO:0042364	water-soluble vitamin biosynthetic process	62	0	0.09	0.33719
GO:0046083	adenine metabolic process	13	0	0.02	0.33829
GO:0046084	adenine biosynthetic process	13	0	0.02	0.33829
GO:0006561	proline biosynthetic process	17	1	0.02	0.33919
GO:2001251	negative regulation of chromosome organization	16	0	0.02	0.33926
GO:0006546	glycine catabolic process	13	0	0.02	0.34048
GO:0043624	cellular protein complex disassembly	67	0	0.09	0.3409
GO:0061640	cytoskeleton-dependent cytokinesis	155	0	0.21	0.34182
GO:0071555	cell wall organization	550	1	0.76	0.34265
GO:0050789	regulation of biological process	5123	5	7.08	0.34273
GO:0034614	cellular response to reactive oxygen species	214	1	0.3	0.34317
GO:0090333	regulation of stomatal closure	6	0	0.01	0.3435
GO:0043933	macromolecular complex subunit organization	1090	0	1.51	0.34397
GO:0019953	sexual reproduction	56	1	0.08	0.34516
GO:0007076	mitotic chromosome condensation	13	0	0.02	0.34664
GO:0097428	protein maturation by iron-sulfur cluster transfer	12	0	0.02	0.34666
GO:0009314	response to radiation	332	0	0.46	0.3469
GO:0000904	cell morphogenesis involved in differentiation	67	0	0.09	0.34704
GO:0010286	heat acclimation	15	0	0.02	0.34804
GO:0007186	G-protein coupled receptor signaling pathway	32	0	0.04	0.34815
GO:0030004	cellular monovalent inorganic cation homeostasis	54	0	0.07	0.34823
GO:0033500	carbohydrate homeostasis	14	0	0.02	0.34832
GO:0042436	indole-containing compound catabolic process	6	0	0.01	0.34891
GO:0006569	tryptophan catabolic process	6	0	0.01	0.34891
GO:0019441	tryptophan catabolic process to kynurenine	6	0	0.01	0.34891
GO:0046218	indolalkylamine catabolic process	6	0	0.01	0.34891
GO:0070189	kynurenine metabolic process	6	0	0.01	0.34891
GO:0046185	aldehyde catabolic process	9	0	0.01	0.3493
GO:0045944	positive regulation of transcription from RNA polymerase II promoter	106	0	0.15	0.35075
GO:0065003	macromolecular complex assembly	945	0	1.31	0.35306
GO:0048511	rhythmic process	22	0	0.03	0.3531
GO:0007623	circadian rhythm	22	0	0.03	0.3531
GO:0060236	regulation of mitotic spindle organization	8	0	0.01	0.35312
GO:0090224	regulation of spindle organization	8	0	0.01	0.35312
GO:0000303	response to superoxide	37	0	0.05	0.35341
GO:0000305	response to oxygen radical	37	0	0.05	0.35341
GO:1902531	regulation of intracellular signal transduction	57	0	0.08	0.35369
GO:0032504	multicellular organism reproduction	74	1	0.1	0.35387
GO:0008654	phospholipid biosynthetic process	120	0	0.17	0.35392
GO:0042398	cellular modified amino acid biosynthetic process	60	0	0.08	0.35396
GO:0016246	RNA interference	34	0	0.05	0.35422
GO:0030422	production of siRNA involved in RNA interference	34	0	0.05	0.35422
GO:0006281	DNA repair	335	0	0.46	0.35423
GO:0051193	regulation of cofactor metabolic process	8	0	0.01	0.35434
GO:0052482	defense response by cell wall thickening	10	0	0.01	0.35442
GO:0052542	defense response by callose deposition	10	0	0.01	0.35442
GO:0052544	defense response by callose deposition in cell wall	10	0	0.01	0.35442
GO:0045338	farnesyl diphosphate metabolic process	10	0	0.01	0.35502
GO:0072523	purine-containing compound catabolic process	160	0	0.22	0.35536
GO:0000291	nuclear-transcribed mRNA catabolic process, exonucleolytic	20	0	0.03	0.35593
GO:0001558	regulation of cell growth	35	0	0.05	0.35616
GO:0009733	response to auxin	335	0	0.46	0.35617
GO:0043137	DNA replication, removal of RNA primer	6	0	0.01	0.35618
GO:0010337	regulation of salicylic acid metabolic process	6	0	0.01	0.35685
GO:0009697	salicylic acid biosynthetic process	6	0	0.01	0.35685
GO:0051347	positive regulation of transferase activity	54	0	0.07	0.35688
GO:0009938	negative regulation of gibberellic acid mediated signaling pathway	12	0	0.02	0.35776
GO:0006575	cellular modified amino acid metabolic process	215	0	0.3	0.35855
GO:0002376	immune system process	164	4	0.23	0.35921
GO:0090116	C-5 methylation of cytosine	7	0	0.01	0.35948
GO:0032776	DNA methylation on cytosine	7	0	0.01	0.35948
GO:1901701	cellular response to oxygen-containing compound	558	1	0.77	0.36036
GO:0018195	peptidyl-arginine modification	15	0	0.02	0.36122
GO:0018216	peptidyl-arginine methylation	15	0	0.02	0.36122
GO:0051172	negative regulation of nitrogen compound metabolic process	149	0	0.21	0.36137
GO:1900618	regulation of shoot system morphogenesis	6	0	0.01	0.36159
GO:0044419	interspecies interaction between organisms	36	0	0.05	0.36179
GO:0044403	symbiosis, encompassing mutualism through parasitism	36	0	0.05	0.36179
GO:0009606	tropism	40	0	0.06	0.36207
GO:0042773	ATP synthesis coupled electron transport	180	0	0.25	0.36252
GO:0045489	pectin biosynthetic process	40	0	0.06	0.36301
GO:0006402	mRNA catabolic process	101	0	0.14	0.36382
GO:1901700	response to oxygen-containing compound	850	1	1.17	0.36436
GO:0034762	regulation of transmembrane transport	14	0	0.02	0.36448
GO:0034765	regulation of ion transmembrane transport	14	0	0.02	0.36448
GO:0019222	regulation of metabolic process	3157	3	4.36	0.36449
GO:0006352	DNA-templated transcription, initiation	123	0	0.17	0.36485
GO:0016572	histone phosphorylation	9	0	0.01	0.36515
GO:0090332	stomatal closure	13	0	0.02	0.3663
GO:0032543	mitochondrial translation	64	0	0.09	0.36662
GO:0034472	snRNA 3'-end processing	12	0	0.02	0.36765
GO:0006022	aminoglycan metabolic process	48	1	0.07	0.3678
GO:0010363	regulation of plant-type hypersensitive response	8	0	0.01	0.36794
GO:0000028	ribosomal small subunit assembly	70	0	0.1	0.36814
GO:0071407	cellular response to organic cyclic compound	119	0	0.16	0.36829
GO:0048280	vesicle fusion with Golgi apparatus	16	0	0.02	0.36846
GO:0048316	seed development	267	1	0.37	0.36854
GO:0006890	retrograde vesicle-mediated transport, Golgi to ER	43	0	0.06	0.36856
GO:0048581	negative regulation of post-embryonic development	45	0	0.06	0.36954
GO:0044712	single-organism catabolic process	997	2	1.38	0.36961
GO:0009250	glucan biosynthetic process	145	0	0.2	0.36965
GO:0019419	sulfate reduction	9	0	0.01	0.37014
GO:0045185	maintenance of protein location	32	0	0.04	0.37019
GO:0071029	nuclear ncRNA surveillance	6	0	0.01	0.37086
GO:0071046	nuclear polyadenylation-dependent ncRNA catabolic process	6	0	0.01	0.37086
GO:0071035	nuclear polyadenylation-dependent rRNA catabolic process	6	0	0.01	0.37086
GO:0071038	nuclear polyadenylation-dependent tRNA catabolic process	6	0	0.01	0.37086
GO:0043633	polyadenylation-dependent RNA catabolic process	6	0	0.01	0.37086
GO:0043634	polyadenylation-dependent ncRNA catabolic process	6	0	0.01	0.37086
GO:0000467	exonucleolytic trimming to generate mature 3'-end of 5.8S rRNA from tricistronic rRNA transcript (SSU-rRNA, 5.8S rRNA, LSU-rRNA)	6	0	0.01	0.37086
GO:0000459	exonucleolytic trimming involved in rRNA processing	6	0	0.01	0.37086
GO:0016078	tRNA catabolic process	6	0	0.01	0.37086
GO:0043928	exonucleolytic nuclear-transcribed mRNA catabolic process involved in deadenylation-dependent decay	6	0	0.01	0.37086
GO:0010565	regulation of cellular ketone metabolic process	43	0	0.06	0.37119
GO:0009799	specification of symmetry	8	0	0.01	0.37122
GO:0009808	lignin metabolic process	67	0	0.09	0.37124
GO:0051259	protein oligomerization	32	0	0.04	0.37224
GO:0006814	sodium ion transport	31	0	0.04	0.37276
GO:0072529	pyrimidine-containing compound catabolic process	11	0	0.02	0.37279
GO:0006891	intra-Golgi vesicle-mediated transport	68	0	0.09	0.3729
GO:0006613	cotranslational protein targeting to membrane	31	0	0.04	0.3737
GO:0006614	SRP-dependent cotranslational protein targeting to membrane	31	0	0.04	0.3737
GO:0040008	regulation of growth	78	0	0.11	0.37419
GO:0009913	epidermal cell differentiation	91	0	0.13	0.37444
GO:0030855	epithelial cell differentiation	91	0	0.13	0.37444
GO:0071806	protein transmembrane transport	126	0	0.17	0.37478
GO:0009102	biotin biosynthetic process	8	0	0.01	0.37514
GO:0006768	biotin metabolic process	8	0	0.01	0.37514
GO:0051570	regulation of histone H3-K9 methylation	8	0	0.01	0.37526
GO:0009165	nucleotide biosynthetic process	451	1	0.62	0.37545
GO:0080090	regulation of primary metabolic process	2640	3	3.65	0.3757
GO:0043066	negative regulation of apoptotic process	6	0	0.01	0.37579
GO:0005982	starch metabolic process	53	1	0.07	0.37584
GO:0010476	gibberellin mediated signaling pathway	41	0	0.06	0.37587
GO:0071370	cellular response to gibberellin stimulus	41	0	0.06	0.37587
GO:0009098	leucine biosynthetic process	10	0	0.01	0.3766
GO:0009169	purine ribonucleoside monophosphate catabolic process	6	0	0.01	0.37678
GO:0009158	ribonucleoside monophosphate catabolic process	6	0	0.01	0.37678
GO:0009125	nucleoside monophosphate catabolic process	6	0	0.01	0.37678
GO:0009128	purine nucleoside monophosphate catabolic process	6	0	0.01	0.37678
GO:0006200	ATP catabolic process	6	0	0.01	0.37678
GO:0043462	regulation of ATPase activity	6	0	0.01	0.37678
GO:1903289	regulation of ATP catabolic process	6	0	0.01	0.37678
GO:0051053	negative regulation of DNA metabolic process	17	0	0.02	0.37698
GO:0009263	deoxyribonucleotide biosynthetic process	15	0	0.02	0.37771
GO:0022607	cellular component assembly	1115	0	1.54	0.37785
GO:2000033	regulation of seed dormancy process	9	0	0.01	0.37796
GO:0032956	regulation of actin cytoskeleton organization	35	0	0.05	0.37803
GO:0032970	regulation of actin filament-based process	35	0	0.05	0.37803
GO:0051026	chiasma assembly	6	0	0.01	0.37916
GO:0009069	serine family amino acid metabolic process	84	0	0.12	0.37929
GO:0034613	cellular protein localization	731	0	1.01	0.37995
GO:0042558	pteridine-containing compound metabolic process	61	0	0.08	0.38028
GO:0032886	regulation of microtubule-based process	15	0	0.02	0.38041
GO:1901642	nucleoside transmembrane transport	24	0	0.03	0.38049
GO:0060255	regulation of macromolecule metabolic process	2607	3	3.6	0.38085
GO:0048285	organelle fission	200	0	0.28	0.38144
GO:0000819	sister chromatid segregation	37	0	0.05	0.38156
GO:0016122	xanthophyll metabolic process	19	0	0.03	0.38225
GO:0008614	pyridoxine metabolic process	6	0	0.01	0.38234
GO:2001252	positive regulation of chromosome organization	24	0	0.03	0.38318
GO:0045333	cellular respiration	337	0	0.47	0.38332
GO:0009894	regulation of catabolic process	240	0	0.33	0.38359
GO:0006474	N-terminal protein amino acid acetylation	52	1	0.07	0.3839
GO:0070126	mitochondrial translational termination	8	0	0.01	0.38395
GO:0010205	photoinhibition	11	0	0.02	0.38398
GO:0043155	negative regulation of photosynthesis, light reaction	11	0	0.02	0.38398
GO:0050776	regulation of immune response	43	0	0.06	0.38477
GO:0045088	regulation of innate immune response	43	0	0.06	0.38477
GO:0045229	external encapsulating structure organization	588	1	0.81	0.38756
GO:0044804	nucleophagy	16	0	0.02	0.38773
GO:0009812	flavonoid metabolic process	258	1	0.36	0.38776
GO:0070125	mitochondrial translational elongation	15	0	0.02	0.38978
GO:0010154	fruit development	312	1	0.43	0.39029
GO:0051235	maintenance of location	92	0	0.13	0.39047
GO:0006397	mRNA processing	419	0	0.58	0.39066
GO:0018904	ether metabolic process	57	0	0.08	0.39095
GO:0006662	glycerol ether metabolic process	57	0	0.08	0.39095
GO:1902221	erythrose 4-phosphate/phosphoenolpyruvate family amino acid metabolic process	31	0	0.04	0.39171
GO:0006558	L-phenylalanine metabolic process	31	0	0.04	0.39171
GO:0051596	methylglyoxal catabolic process	8	0	0.01	0.39262
GO:0009438	methylglyoxal metabolic process	8	0	0.01	0.39262
GO:0046700	heterocycle catabolic process	361	0	0.5	0.39472
GO:0006913	nucleocytoplasmic transport	162	0	0.22	0.39473
GO:0051169	nuclear transport	162	0	0.22	0.39473
GO:0009607	response to biotic stimulus	371	7	0.51	0.39517
GO:0042559	pteridine-containing compound biosynthetic process	29	0	0.04	0.3963
GO:0019284	L-methionine biosynthetic process from S-adenosylmethionine	6	0	0.01	0.39642
GO:0034622	cellular macromolecular complex assembly	881	0	1.22	0.39649
GO:0000463	maturation of LSU-rRNA from tricistronic rRNA transcript (SSU-rRNA, 5.8S rRNA, LSU-rRNA)	29	0	0.04	0.39652
GO:0033108	mitochondrial respiratory chain complex assembly	34	0	0.05	0.39664
GO:0055114	oxidation-reduction process	3445	6	4.76	0.39716
GO:1901565	organonitrogen compound catabolic process	353	1	0.49	0.39756
GO:0006415	translational termination	39	0	0.05	0.39775
GO:0046487	glyoxylate metabolic process	15	0	0.02	0.39803
GO:0040007	growth	285	0	0.39	0.39866
GO:0006364	rRNA processing	350	0	0.48	0.39886
GO:0031146	SCF-dependent proteasomal ubiquitin-dependent protein catabolic process	44	0	0.06	0.39915
GO:0010387	COP9 signalosome assembly	6	0	0.01	0.40028
GO:0046686	response to cadmium ion	17	0	0.02	0.40035
GO:0009452	7-methylguanosine RNA capping	15	0	0.02	0.40099
GO:0036260	RNA capping	15	0	0.02	0.40099
GO:0009106	lipoate metabolic process	13	0	0.02	0.40151
GO:0009107	lipoate biosynthetic process	13	0	0.02	0.40151
GO:0009249	protein lipoylation	13	0	0.02	0.40151
GO:0042726	flavin-containing compound metabolic process	23	0	0.03	0.40221
GO:0009688	abscisic acid biosynthetic process	8	0	0.01	0.40282
GO:0048868	pollen tube development	42	0	0.06	0.40291
GO:0015766	disaccharide transport	14	0	0.02	0.40308
GO:0015770	sucrose transport	14	0	0.02	0.40308
GO:0015772	oligosaccharide transport	14	0	0.02	0.40308
GO:0006897	endocytosis	72	0	0.1	0.40363
GO:0042744	hydrogen peroxide catabolic process	170	1	0.23	0.40363
GO:0006520	cellular amino acid metabolic process	880	2	1.22	0.40365
GO:0007049	cell cycle	511	0	0.71	0.40387
GO:0018065	protein-cofactor linkage	17	0	0.02	0.40399
GO:0030261	chromosome condensation	14	0	0.02	0.40413
GO:0006040	amino sugar metabolic process	64	1	0.09	0.40442
GO:0032879	regulation of localization	111	0	0.15	0.40485
GO:0009798	axis specification	24	0	0.03	0.40611
GO:0006308	DNA catabolic process	10	0	0.01	0.40621
GO:0070828	heterochromatin organization	14	0	0.02	0.40668
GO:0030029	actin filament-based process	77	0	0.11	0.4074
GO:0030036	actin cytoskeleton organization	77	0	0.11	0.4074
GO:0070932	histone H3 deacetylation	10	0	0.01	0.4074
GO:0006452	translational frameshifting	9	0	0.01	0.40842
GO:0006449	regulation of translational termination	9	0	0.01	0.40842
GO:0043243	positive regulation of protein complex disassembly	9	0	0.01	0.40842
GO:0045901	positive regulation of translational elongation	9	0	0.01	0.40842
GO:0045905	positive regulation of translational termination	9	0	0.01	0.40842
GO:0006901	vesicle coating	28	0	0.04	0.40854
GO:0010099	regulation of photomorphogenesis	9	0	0.01	0.40876
GO:2000030	regulation of response to red or far red light	9	0	0.01	0.40876
GO:0044270	cellular nitrogen compound catabolic process	363	0	0.5	0.40876
GO:0016482	cytoplasmic transport	478	0	0.66	0.40919
GO:0019464	glycine decarboxylation via glycine cleavage system	10	0	0.01	0.40963
GO:0009910	negative regulation of flower development	19	0	0.03	0.4105
GO:0006313	transposition, DNA-mediated	14	0	0.02	0.41121
GO:0018206	peptidyl-methionine modification	8	0	0.01	0.41159
GO:0017196	N-terminal peptidyl-methionine acetylation	8	0	0.01	0.41159
GO:0006355	regulation of transcription, DNA-templated	2017	3	2.79	0.41178
GO:2001141	regulation of RNA biosynthetic process	2017	3	2.79	0.41178
GO:0070301	cellular response to hydrogen peroxide	172	1	0.24	0.41207
GO:0022604	regulation of cell morphogenesis	58	0	0.08	0.41233
GO:0010817	regulation of hormone levels	179	1	0.25	0.41292
GO:0009067	aspartate family amino acid biosynthetic process	103	1	0.14	0.41302
GO:0000079	regulation of cyclin-dependent protein serine/threonine kinase activity	26	0	0.04	0.41303
GO:0009832	plant-type cell wall biogenesis	110	0	0.15	0.41304
GO:0043288	apocarotenoid metabolic process	13	0	0.02	0.41311
GO:0009741	response to brassinosteroid	55	0	0.08	0.41346
GO:0034285	response to disaccharide	23	0	0.03	0.41484
GO:0016075	rRNA catabolic process	21	0	0.03	0.41516
GO:1901605	alpha-amino acid metabolic process	515	2	0.71	0.41618
GO:0008360	regulation of cell shape	40	0	0.06	0.41663
GO:0009074	aromatic amino acid family catabolic process	28	0	0.04	0.41753
GO:0006650	glycerophospholipid metabolic process	189	0	0.26	0.41774
GO:0000480	endonucleolytic cleavage in 5'-ETS of tricistronic rRNA transcript (SSU-rRNA, 5.8S rRNA, LSU-rRNA)	6	0	0.01	0.41776
GO:0035966	response to topologically incorrect protein	21	0	0.03	0.41798
GO:0000184	nuclear-transcribed mRNA catabolic process, nonsense-mediated decay	19	0	0.03	0.41804
GO:0051567	histone H3-K9 methylation	9	0	0.01	0.41935
GO:0015689	molybdate ion transport	11	0	0.02	0.41983
GO:0046486	glycerolipid metabolic process	223	0	0.31	0.42032
GO:0010243	response to organonitrogen compound	7	0	0.01	0.42054
GO:0006448	regulation of translational elongation	63	0	0.09	0.42082
GO:0006399	tRNA metabolic process	308	0	0.43	0.42089
GO:0071450	cellular response to oxygen radical	33	0	0.05	0.42125
GO:0071451	cellular response to superoxide	33	0	0.05	0.42125
GO:0019430	removal of superoxide radicals	33	0	0.05	0.42125
GO:0070727	cellular macromolecule localization	750	0	1.04	0.42143
GO:0009262	deoxyribonucleotide metabolic process	18	0	0.02	0.42228
GO:0051510	regulation of unidimensional cell growth	18	0	0.02	0.42228
GO:0009396	folic acid-containing compound biosynthetic process	27	0	0.04	0.42245
GO:0016560	protein import into peroxisome matrix, docking	7	0	0.01	0.42285
GO:0022615	protein to membrane docking	7	0	0.01	0.42285
GO:0090421	embryonic meristem initiation	6	0	0.01	0.42317
GO:0045116	protein neddylation	20	0	0.03	0.42329
GO:0006400	tRNA modification	125	0	0.17	0.42419
GO:0043405	regulation of MAP kinase activity	15	0	0.02	0.42426
GO:0065007	biological regulation	5802	7	8.02	0.4248
GO:0009686	gibberellin biosynthetic process	23	0	0.03	0.42547
GO:0015031	protein transport	821	0	1.13	0.42705
GO:0000059	protein import into nucleus, docking	30	0	0.04	0.42712
GO:0019219	regulation of nucleobase-containing compound metabolic process	2229	3	3.08	0.42794
GO:0033014	tetrapyrrole biosynthetic process	81	0	0.11	0.42839
GO:0018344	protein geranylgeranylation	9	0	0.01	0.42843
GO:0048825	cotyledon development	9	0	0.01	0.42852
GO:0009889	regulation of biosynthetic process	2234	3	3.09	0.42855
GO:0044786	cell cycle DNA replication	31	0	0.04	0.42869
GO:0044092	negative regulation of molecular function	263	0	0.36	0.42869
GO:0043043	peptide biosynthetic process	9	0	0.01	0.42972
GO:0009615	response to virus	29	0	0.04	0.43032
GO:0009583	detection of light stimulus	20	0	0.03	0.43039
GO:0010228	vegetative to reproductive phase transition of meristem	91	0	0.13	0.432
GO:1901361	organic cyclic compound catabolic process	432	0	0.6	0.43217
GO:0045934	negative regulation of nucleobase-containing compound metabolic process	143	0	0.2	0.43225
GO:0045184	establishment of protein localization	839	0	1.16	0.43227
GO:0010608	posttranscriptional regulation of gene expression	228	0	0.31	0.43255
GO:1903046	meiotic cell cycle process	74	0	0.1	0.43257
GO:0006298	mismatch repair	24	0	0.03	0.43278
GO:0031365	N-terminal protein amino acid modification	67	1	0.09	0.43316
GO:0016123	xanthophyll biosynthetic process	13	0	0.02	0.43345
GO:0035384	thioester biosynthetic process	43	0	0.06	0.43374
GO:0071616	acyl-CoA biosynthetic process	43	0	0.06	0.43374
GO:0043543	protein acylation	128	1	0.18	0.43446
GO:0000707	meiotic DNA recombinase assembly	6	0	0.01	0.43693
GO:0016073	snRNA metabolic process	19	0	0.03	0.43906
GO:0031122	cytoplasmic microtubule organization	50	0	0.07	0.43925
GO:1902241	copal-8-ol diphosphate(3-) metabolic process	10	0	0.01	0.43957
GO:1902626	assembly of large subunit precursor of preribosome	11	0	0.02	0.44005
GO:0006465	signal peptide processing	40	0	0.06	0.44012
GO:0010586	miRNA metabolic process	7	0	0.01	0.44084
GO:0008216	spermidine metabolic process	19	0	0.03	0.44093
GO:0045491	xylan metabolic process	50	1	0.07	0.44114
GO:0061024	membrane organization	362	0	0.5	0.44208
GO:0010468	regulation of gene expression	2376	3	3.28	0.44249
GO:0009584	detection of visible light	10	0	0.01	0.44314
GO:0031326	regulation of cellular biosynthetic process	2230	3	3.08	0.44402
GO:0016143	S-glycoside metabolic process	25	0	0.03	0.44457
GO:0019760	glucosinolate metabolic process	25	0	0.03	0.44457
GO:0019757	glycosinolate metabolic process	25	0	0.03	0.44457
GO:0043207	response to external biotic stimulus	285	0	0.39	0.44512
GO:0051707	response to other organism	285	0	0.39	0.44512
GO:0009698	phenylpropanoid metabolic process	154	0	0.21	0.44525
GO:0044208	'de novo' AMP biosynthetic process	8	0	0.01	0.4454
GO:0006629	lipid metabolic process	1276	0	1.76	0.4454
GO:0046417	chorismate metabolic process	23	0	0.03	0.44552
GO:0045995	regulation of embryonic development	9	0	0.01	0.44605
GO:2000112	regulation of cellular macromolecule biosynthetic process	2197	3	3.04	0.4463
GO:0010556	regulation of macromolecule biosynthetic process	2197	3	3.04	0.4463
GO:0032392	DNA geometric change	63	0	0.09	0.44667
GO:0032508	DNA duplex unwinding	63	0	0.09	0.44667
GO:0007004	telomere maintenance via telomerase	9	0	0.01	0.44679
GO:0010833	telomere maintenance via telomere lengthening	9	0	0.01	0.44679
GO:0046033	AMP metabolic process	12	0	0.02	0.44698
GO:0006167	AMP biosynthetic process	12	0	0.02	0.44698
GO:0048268	clathrin coat assembly	21	0	0.03	0.44771
GO:0006892	post-Golgi vesicle-mediated transport	33	0	0.05	0.44869
GO:0019318	hexose metabolic process	150	0	0.21	0.44896
GO:0006839	mitochondrial transport	103	0	0.14	0.44955
GO:0035435	phosphate ion transmembrane transport	6	0	0.01	0.4498
GO:0072348	sulfur compound transport	50	1	0.07	0.4505
GO:0031118	rRNA pseudouridine synthesis	8	0	0.01	0.45067
GO:0006801	superoxide metabolic process	34	0	0.05	0.45103
GO:0043628	ncRNA 3'-end processing	28	0	0.04	0.45176
GO:0042445	hormone metabolic process	129	1	0.18	0.45203
GO:0034620	cellular response to unfolded protein	9	0	0.01	0.45211
GO:0001522	pseudouridine synthesis	35	0	0.05	0.45291
GO:1902589	single-organism organelle organization	859	0	1.19	0.45302
GO:0030490	maturation of SSU-rRNA	114	0	0.16	0.4531
GO:0045682	regulation of epidermis development	7	0	0.01	0.4532
GO:0033037	polysaccharide localization	13	0	0.02	0.45558
GO:0052545	callose localization	13	0	0.02	0.45558
GO:0010394	homogalacturonan metabolic process	6	0	0.01	0.45655
GO:0010289	homogalacturonan biosynthetic process	6	0	0.01	0.45655
GO:0061572	actin filament bundle organization	7	0	0.01	0.45678
GO:0051017	actin filament bundle assembly	7	0	0.01	0.45678
GO:0019722	calcium-mediated signaling	24	0	0.03	0.45689
GO:0019932	second-messenger-mediated signaling	24	0	0.03	0.45689
GO:0009231	riboflavin biosynthetic process	21	0	0.03	0.4569
GO:0042727	flavin-containing compound biosynthetic process	21	0	0.03	0.4569
GO:0006771	riboflavin metabolic process	21	0	0.03	0.4569
GO:0051252	regulation of RNA metabolic process	2048	3	2.83	0.45701
GO:0061512	protein localization to cilium	19	0	0.03	0.45718
GO:0015846	polyamine transport	8	0	0.01	0.45733
GO:0009110	vitamin biosynthetic process	74	0	0.1	0.45764
GO:0051336	regulation of hydrolase activity	279	0	0.39	0.4578
GO:0008104	protein localization	920	0	1.27	0.45811
GO:0031329	regulation of cellular catabolic process	228	0	0.31	0.4583
GO:0031060	regulation of histone methylation	10	0	0.01	0.45833
GO:0042723	thiamine-containing compound metabolic process	13	0	0.02	0.45864
GO:0006772	thiamine metabolic process	13	0	0.02	0.45864
GO:0006790	sulfur compound metabolic process	445	0	0.61	0.45872
GO:0006863	purine nucleobase transport	7	0	0.01	0.45969
GO:0015851	nucleobase transport	7	0	0.01	0.45969
GO:0015853	adenine transport	7	0	0.01	0.45969
GO:0015854	guanine transport	7	0	0.01	0.45969
GO:0000278	mitotic cell cycle	187	0	0.26	0.45998
GO:0010921	regulation of phosphatase activity	93	0	0.13	0.4604
GO:0032465	regulation of cytokinesis	12	0	0.02	0.46063
GO:0035195	gene silencing by miRNA	20	0	0.03	0.46065
GO:0006357	regulation of transcription from RNA polymerase II promoter	256	0	0.35	0.46126
GO:1902591	single-organism membrane budding	31	0	0.04	0.46139
GO:0071478	cellular response to radiation	56	0	0.08	0.46154
GO:0009960	endosperm development	15	0	0.02	0.4616
GO:0009891	positive regulation of biosynthetic process	233	0	0.32	0.46259
GO:0051701	interaction with host	22	0	0.03	0.46297
GO:0006720	isoprenoid metabolic process	244	0	0.34	0.46301
GO:0046113	nucleobase catabolic process	21	0	0.03	0.46405
GO:0040029	regulation of gene expression, epigenetic	139	0	0.19	0.4647
GO:0009900	dehiscence	14	0	0.02	0.46484
GO:0019915	lipid storage	30	0	0.04	0.46719
GO:0019563	glycerol catabolic process	8	0	0.01	0.4674
GO:0019405	alditol catabolic process	8	0	0.01	0.4674
GO:0071705	nitrogen compound transport	450	0	0.62	0.46875
GO:0006473	protein acetylation	117	1	0.16	0.46888
GO:0015833	peptide transport	41	0	0.06	0.47005
GO:0016072	rRNA metabolic process	355	0	0.49	0.47086
GO:0072593	reactive oxygen species metabolic process	241	1	0.33	0.47116
GO:0000447	endonucleolytic cleavage in ITS1 to separate SSU-rRNA from 5.8S rRNA and LSU-rRNA from tricistronic rRNA transcript (SSU-rRNA, 5.8S rRNA, LSU-rRNA)	14	0	0.02	0.4713
GO:0006378	mRNA polyadenylation	17	0	0.02	0.47259
GO:0015850	organic hydroxy compound transport	65	1	0.09	0.47321
GO:0019439	aromatic compound catabolic process	421	0	0.58	0.47337
GO:0070482	response to oxygen levels	18	0	0.02	0.47404
GO:0031327	negative regulation of cellular biosynthetic process	168	0	0.23	0.47421
GO:0048229	gametophyte development	204	1	0.28	0.47457
GO:0070071	proton-transporting two-sector ATPase complex assembly	16	0	0.02	0.47478
GO:0090069	regulation of ribosome biogenesis	8	0	0.01	0.47527
GO:0009855	determination of bilateral symmetry	6	0	0.01	0.47561
GO:0007129	synapsis	8	0	0.01	0.476
GO:0001708	cell fate specification	13	0	0.02	0.4762
GO:0022414	reproductive process	745	3	1.03	0.47675
GO:0006760	folic acid-containing compound metabolic process	58	0	0.08	0.47881
GO:0010016	shoot system morphogenesis	108	1	0.15	0.47894
GO:0071482	cellular response to light stimulus	48	0	0.07	0.47915
GO:0016049	cell growth	216	0	0.3	0.4792
GO:0044262	cellular carbohydrate metabolic process	525	1	0.73	0.47985
GO:0044550	secondary metabolite biosynthetic process	309	1	0.43	0.47987
GO:0042886	amide transport	48	0	0.07	0.47996
GO:0044281	small molecule metabolic process	3155	4	4.36	0.48011
GO:0019585	glucuronate metabolic process	190	1	0.26	0.48039
GO:0052695	cellular glucuronidation	190	1	0.26	0.48039
GO:0052696	flavonoid glucuronidation	190	1	0.26	0.48039
GO:0006063	uronic acid metabolic process	190	1	0.26	0.48039
GO:0007264	small GTPase mediated signal transduction	241	0	0.33	0.48048
GO:0048236	plant-type spore development	10	0	0.01	0.48056
GO:0033365	protein localization to organelle	373	0	0.52	0.48067
GO:0032329	serine transport	6	0	0.01	0.48096
GO:0015825	L-serine transport	6	0	0.01	0.48096
GO:0072507	divalent inorganic cation homeostasis	37	0	0.05	0.48389
GO:0010383	cell wall polysaccharide metabolic process	123	1	0.17	0.48395
GO:0090068	positive regulation of cell cycle process	26	0	0.04	0.48447
GO:0009306	protein secretion	19	0	0.03	0.48506
GO:0031507	heterochromatin assembly	12	0	0.02	0.4851
GO:0043666	regulation of phosphoprotein phosphatase activity	91	0	0.13	0.48521
GO:0009845	seed germination	73	0	0.1	0.48521
GO:0009685	gibberellin metabolic process	36	0	0.05	0.48621
GO:0007064	mitotic sister chromatid cohesion	10	0	0.01	0.48675
GO:0010411	xyloglucan metabolic process	63	0	0.09	0.48704
GO:0018105	peptidyl-serine phosphorylation	165	0	0.23	0.48758
GO:0000462	maturation of SSU-rRNA from tricistronic rRNA transcript (SSU-rRNA, 5.8S rRNA, LSU-rRNA)	96	0	0.13	0.48831
GO:0009640	photomorphogenesis	50	0	0.07	0.48925
GO:0000002	mitochondrial genome maintenance	7	0	0.01	0.48939
GO:1901564	organonitrogen compound metabolic process	2278	5	3.15	0.48958
GO:0034035	purine ribonucleoside bisphosphate metabolic process	12	0	0.02	0.48984
GO:0015969	guanosine tetraphosphate metabolic process	12	0	0.02	0.48984
GO:0043069	negative regulation of programmed cell death	18	0	0.02	0.4899
GO:0044571	[2Fe-2S] cluster assembly	6	0	0.01	0.49051
GO:0071669	plant-type cell wall organization or biogenesis	271	1	0.37	0.4918
GO:0006012	galactose metabolic process	30	0	0.04	0.49233
GO:0046513	ceramide biosynthetic process	13	0	0.02	0.49261
GO:0070507	regulation of microtubule cytoskeleton organization	12	0	0.02	0.49272
GO:0015791	polyol transport	60	1	0.08	0.49306
GO:0072344	rescue of stalled ribosome	6	0	0.01	0.49414
GO:0009072	aromatic amino acid family metabolic process	113	0	0.16	0.49415
GO:0071902	positive regulation of protein serine/threonine kinase activity	16	0	0.02	0.49509
GO:0010019	chloroplast-nucleus signaling pathway	8	0	0.01	0.49529
GO:0009117	nucleotide metabolic process	940	1	1.3	0.49655
GO:0044042	glucan metabolic process	305	1	0.42	0.49696
GO:0010364	regulation of ethylene biosynthetic process	12	0	0.02	0.49756
GO:0031335	regulation of sulfur amino acid metabolic process	12	0	0.02	0.49756
GO:1900911	regulation of olefin biosynthetic process	12	0	0.02	0.49756
GO:1900908	regulation of olefin metabolic process	12	0	0.02	0.49756
GO:0031570	DNA integrity checkpoint	11	0	0.02	0.49764
GO:0006534	cysteine metabolic process	31	0	0.04	0.49938
GO:0006029	proteoglycan metabolic process	9	0	0.01	0.4994
GO:0009743	response to carbohydrate	40	0	0.06	0.49957
GO:0071702	organic substance transport	1599	3	2.21	0.4999
GO:0009628	response to abiotic stimulus	760	0	1.05	0.50002
GO:0007062	sister chromatid cohesion	28	0	0.04	0.50041
GO:1903047	mitotic cell cycle process	169	0	0.23	0.50048
GO:0009555	pollen development	136	1	0.19	0.50053
GO:0016052	carbohydrate catabolic process	498	2	0.69	0.50235
GO:0044272	sulfur compound biosynthetic process	200	0	0.28	0.50342
GO:0000160	phosphorelay signal transduction system	152	0	0.21	0.50346
GO:0000460	maturation of 5.8S rRNA	45	0	0.06	0.5036
GO:0000902	cell morphogenesis	206	0	0.28	0.50367
GO:0045324	late endosome to vacuole transport	15	0	0.02	0.50406
GO:0046416	D-amino acid metabolic process	6	0	0.01	0.50432
GO:0006471	protein ADP-ribosylation	12	0	0.02	0.50445
GO:2000113	negative regulation of cellular macromolecule biosynthetic process	157	0	0.22	0.5054
GO:0010558	negative regulation of macromolecule biosynthetic process	157	0	0.22	0.5054
GO:0042793	transcription from plastid promoter	13	0	0.02	0.50565
GO:0009744	response to sucrose	22	0	0.03	0.50582
GO:0071367	cellular response to brassinosteroid stimulus	45	0	0.06	0.50611
GO:0071383	cellular response to steroid hormone stimulus	45	0	0.06	0.50611
GO:0048545	response to steroid hormone	45	0	0.06	0.50611
GO:0009742	brassinosteroid mediated signaling pathway	45	0	0.06	0.50611
GO:0043401	steroid hormone mediated signaling pathway	45	0	0.06	0.50611
GO:0006388	tRNA splicing, via endonucleolytic cleavage and ligation	8	0	0.01	0.50641
GO:0010257	NADH dehydrogenase complex assembly	11	0	0.02	0.50648
GO:0031328	positive regulation of cellular biosynthetic process	231	0	0.32	0.50675
GO:0070887	cellular response to chemical stimulus	898	1	1.24	0.50684
GO:0071214	cellular response to abiotic stimulus	66	0	0.09	0.50709
GO:1901004	ubiquinone-6 metabolic process	8	0	0.01	0.50754
GO:1901006	ubiquinone-6 biosynthetic process	8	0	0.01	0.50754
GO:0006633	fatty acid biosynthetic process	269	0	0.37	0.50767
GO:0043455	regulation of secondary metabolic process	12	0	0.02	0.50791
GO:0006950	response to stress	2057	8	2.84	0.50828
GO:0035303	regulation of dephosphorylation	94	0	0.13	0.50831
GO:0006097	glyoxylate cycle	11	0	0.02	0.50892
GO:0031323	regulation of cellular metabolic process	2711	3	3.75	0.50908
GO:0009890	negative regulation of biosynthetic process	170	0	0.23	0.50964
GO:0009566	fertilization	16	0	0.02	0.5103
GO:0050896	response to stimulus	4258	10	5.88	0.51032
GO:0044257	cellular protein catabolic process	785	0	1.08	0.51078
GO:0016571	histone methylation	75	0	0.1	0.51082
GO:0010959	regulation of metal ion transport	7	0	0.01	0.51122
GO:0097305	response to alcohol	388	0	0.54	0.51153
GO:0006766	vitamin metabolic process	77	0	0.11	0.51196
GO:0000070	mitotic sister chromatid segregation	32	0	0.04	0.51207
GO:0046499	S-adenosylmethioninamine metabolic process	10	0	0.01	0.5123
GO:0008215	spermine metabolic process	10	0	0.01	0.5123
GO:0006597	spermine biosynthetic process	10	0	0.01	0.5123
GO:0006557	S-adenosylmethioninamine biosynthetic process	10	0	0.01	0.5123
GO:0009651	response to salt stress	137	0	0.19	0.5132
GO:0030162	regulation of proteolysis	134	0	0.19	0.5133
GO:0043096	purine nucleobase salvage	8	0	0.01	0.51332
GO:0032103	positive regulation of response to external stimulus	9	0	0.01	0.51469
GO:0072596	establishment of protein localization to chloroplast	21	0	0.03	0.51499
GO:0072598	protein localization to chloroplast	21	0	0.03	0.51499
GO:0045036	protein targeting to chloroplast	21	0	0.03	0.51499
GO:1902645	tertiary alcohol biosynthetic process	13	0	0.02	0.51528
GO:0055070	copper ion homeostasis	6	0	0.01	0.51545
GO:0030163	protein catabolic process	923	0	1.28	0.5155
GO:0010014	meristem initiation	12	0	0.02	0.51807
GO:0010103	stomatal complex morphogenesis	24	1	0.03	0.51845
GO:0019748	secondary metabolic process	407	1	0.56	0.52018
GO:0046777	protein autophosphorylation	146	0	0.2	0.52117
GO:0036092	phosphatidylinositol-3-phosphate biosynthetic process	7	0	0.01	0.52145
GO:0000910	cytokinesis	187	0	0.26	0.52218
GO:0006528	asparagine metabolic process	27	1	0.04	0.52278
GO:0006529	asparagine biosynthetic process	27	1	0.04	0.52278
GO:0030488	tRNA methylation	38	0	0.05	0.52284
GO:0009850	auxin metabolic process	21	0	0.03	0.52371
GO:0032981	mitochondrial respiratory chain complex I assembly	7	0	0.01	0.52418
GO:0009825	multidimensional cell growth	41	0	0.06	0.52418
GO:0051276	chromosome organization	456	0	0.63	0.52422
GO:2000377	regulation of reactive oxygen species metabolic process	25	0	0.03	0.52508
GO:0010167	response to nitrate	7	0	0.01	0.52563
GO:0010315	auxin efflux	18	0	0.02	0.52565
GO:0044711	single-organism biosynthetic process	2583	4	3.57	0.52567
GO:0006312	mitotic recombination	22	0	0.03	0.52574
GO:0006779	porphyrin-containing compound biosynthetic process	67	0	0.09	0.52658
GO:0051130	positive regulation of cellular component organization	98	0	0.14	0.52691
GO:0002833	positive regulation of response to biotic stimulus	7	0	0.01	0.52757
GO:0043902	positive regulation of multi-organism process	7	0	0.01	0.52757
GO:0010389	regulation of G2/M transition of mitotic cell cycle	10	0	0.01	0.52774
GO:0000086	G2/M transition of mitotic cell cycle	10	0	0.01	0.52774
GO:1902749	regulation of cell cycle G2/M phase transition	10	0	0.01	0.52774
GO:0044839	cell cycle G2/M phase transition	10	0	0.01	0.52774
GO:0070647	protein modification by small protein conjugation or removal	753	0	1.04	0.52865
GO:0033013	tetrapyrrole metabolic process	117	0	0.16	0.52871
GO:0010876	lipid localization	134	1	0.19	0.52891
GO:0006749	glutathione metabolic process	88	0	0.12	0.52918
GO:0042219	cellular modified amino acid catabolic process	8	0	0.01	0.52947
GO:0044088	regulation of vacuole organization	7	0	0.01	0.52983
GO:0048235	pollen sperm cell differentiation	10	0	0.01	0.53023
GO:0044723	single-organism carbohydrate metabolic process	1029	3	1.42	0.53029
GO:0055086	nucleobase-containing small molecule metabolic process	1094	1	1.51	0.53091
GO:0044802	single-organism membrane organization	323	0	0.45	0.53151
GO:0007584	response to nutrient	6	0	0.01	0.53169
GO:0017062	respiratory chain complex III assembly	6	0	0.01	0.53281
GO:0097033	mitochondrial respiratory chain complex III biogenesis	6	0	0.01	0.53281
GO:0034551	mitochondrial respiratory chain complex III assembly	6	0	0.01	0.53281
GO:0046112	nucleobase biosynthetic process	47	0	0.06	0.53315
GO:0033993	response to lipid	422	0	0.58	0.53324
GO:0050794	regulation of cellular process	4462	5	6.16	0.53354
GO:0071495	cellular response to endogenous stimulus	536	0	0.74	0.53361
GO:0032870	cellular response to hormone stimulus	536	0	0.74	0.53361
GO:0006074	(1->3)-beta-D-glucan metabolic process	34	0	0.05	0.53418
GO:0031400	negative regulation of protein modification process	27	0	0.04	0.53636
GO:0052386	cell wall thickening	12	0	0.02	0.53655
GO:0052543	callose deposition in cell wall	12	0	0.02	0.53655
GO:0051128	regulation of cellular component organization	301	0	0.42	0.53747
GO:0035196	production of miRNAs involved in gene silencing by miRNA	16	0	0.02	0.53795
GO:1901992	positive regulation of mitotic cell cycle phase transition	8	0	0.01	0.53811
GO:1901989	positive regulation of cell cycle phase transition	8	0	0.01	0.53811
GO:0006563	L-serine metabolic process	51	0	0.07	0.53896
GO:0009943	adaxial/abaxial axis specification	13	0	0.02	0.53907
GO:0065009	regulation of molecular function	661	0	0.91	0.53929
GO:0051094	positive regulation of developmental process	40	0	0.06	0.53938
GO:0009755	hormone-mediated signaling pathway	534	0	0.74	0.53958
GO:1901419	regulation of response to alcohol	51	0	0.07	0.54033
GO:0030705	cytoskeleton-dependent intracellular transport	6	0	0.01	0.54171
GO:0044767	single-organism developmental process	1536	3	2.12	0.542
GO:0009851	auxin biosynthetic process	14	0	0.02	0.54202
GO:0042026	protein refolding	19	0	0.03	0.54297
GO:0015819	lysine transport	11	0	0.02	0.54377
GO:1902022	L-lysine transport	11	0	0.02	0.54377
GO:1903401	L-lysine transmembrane transport	11	0	0.02	0.54377
GO:0071241	cellular response to inorganic substance	19	0	0.03	0.54425
GO:0048869	cellular developmental process	428	0	0.59	0.54513
GO:0042542	response to hydrogen peroxide	176	1	0.24	0.54537
GO:0009718	anthocyanin-containing compound biosynthetic process	13	0	0.02	0.54543
GO:1901421	positive regulation of response to alcohol	16	0	0.02	0.54552
GO:0006414	translational elongation	151	0	0.21	0.54593
GO:0001887	selenium compound metabolic process	10	0	0.01	0.54679
GO:0010118	stomatal movement	45	0	0.06	0.54683
GO:0031440	regulation of mRNA 3'-end processing	6	0	0.01	0.54701
GO:0043562	cellular response to nitrogen levels	28	0	0.04	0.5473
GO:0010090	trichome morphogenesis	33	0	0.05	0.5475
GO:0051049	regulation of transport	95	0	0.13	0.5487
GO:0061077	chaperone-mediated protein folding	54	0	0.07	0.54912
GO:0009893	positive regulation of metabolic process	367	0	0.51	0.54938
GO:0043132	NAD transport	9	0	0.01	0.55015
GO:0016574	histone ubiquitination	12	0	0.02	0.55124
GO:0009664	plant-type cell wall organization	213	1	0.29	0.55131
GO:0009955	adaxial/abaxial pattern specification	16	0	0.02	0.55143
GO:0009084	glutamine family amino acid biosynthetic process	55	1	0.08	0.55159
GO:0016570	histone modification	177	0	0.24	0.55167
GO:0019344	cysteine biosynthetic process	22	0	0.03	0.55192
GO:0031119	tRNA pseudouridine synthesis	7	0	0.01	0.55196
GO:0009966	regulation of signal transduction	253	0	0.35	0.55254
GO:0006952	defense response	682	7	0.94	0.55262
GO:0010024	phytochromobilin biosynthetic process	6	0	0.01	0.55267
GO:0051202	phytochromobilin metabolic process	6	0	0.01	0.55267
GO:0009644	response to high light intensity	18	0	0.02	0.55271
GO:0018209	peptidyl-serine modification	168	0	0.23	0.55301
GO:0010214	seed coat development	11	0	0.02	0.55378
GO:0055069	zinc ion homeostasis	19	0	0.03	0.55423
GO:0032502	developmental process	1579	3	2.18	0.55437
GO:0050790	regulation of catalytic activity	649	0	0.9	0.55596
GO:0031167	rRNA methylation	34	0	0.05	0.55604
GO:0009556	microsporogenesis	8	0	0.01	0.55643
GO:0061025	membrane fusion	172	0	0.24	0.55652
GO:0016575	histone deacetylation	23	0	0.03	0.55733
GO:0018393	internal peptidyl-lysine acetylation	65	0	0.09	0.55766
GO:0018394	peptidyl-lysine acetylation	65	0	0.09	0.55766
GO:0016573	histone acetylation	65	0	0.09	0.55766
GO:0000271	polysaccharide biosynthetic process	243	0	0.34	0.55775
GO:0051052	regulation of DNA metabolic process	58	0	0.08	0.5586
GO:0006999	nuclear pore organization	23	0	0.03	0.55895
GO:0010029	regulation of seed germination	31	0	0.04	0.55902
GO:0016569	covalent chromatin modification	186	0	0.26	0.55909
GO:0006071	glycerol metabolic process	12	0	0.02	0.55949
GO:0019400	alditol metabolic process	12	0	0.02	0.55949
GO:0008064	regulation of actin polymerization or depolymerization	33	0	0.05	0.56073
GO:0030832	regulation of actin filament length	33	0	0.05	0.56073
GO:0030833	regulation of actin filament polymerization	33	0	0.05	0.56073
GO:0032271	regulation of protein polymerization	33	0	0.05	0.56073
GO:0030041	actin filament polymerization	33	0	0.05	0.56073
GO:0006109	regulation of carbohydrate metabolic process	11	0	0.02	0.5624
GO:0051238	sequestering of metal ion	30	0	0.04	0.56257
GO:0071695	anatomical structure maturation	29	0	0.04	0.56262
GO:0009835	fruit ripening	29	0	0.04	0.56262
GO:0045851	pH reduction	27	0	0.04	0.56262
GO:0007035	vacuolar acidification	27	0	0.04	0.56262
GO:0051452	intracellular pH reduction	27	0	0.04	0.56262
GO:0009423	chorismate biosynthetic process	18	0	0.02	0.56273
GO:0000727	double-strand break repair via break-induced replication	9	0	0.01	0.56412
GO:0043086	negative regulation of catalytic activity	260	0	0.36	0.56452
GO:0048466	androecium development	38	0	0.05	0.56494
GO:0048443	stamen development	38	0	0.05	0.56494
GO:0010212	response to ionizing radiation	31	0	0.04	0.56499
GO:0006751	glutathione catabolic process	6	0	0.01	0.56502
GO:0006493	protein O-linked glycosylation	9	0	0.01	0.56598
GO:0044264	cellular polysaccharide metabolic process	359	1	0.5	0.56624
GO:0055046	microgametogenesis	15	0	0.02	0.56707
GO:0023051	regulation of signaling	255	0	0.35	0.56732
GO:0010646	regulation of cell communication	255	0	0.35	0.56732
GO:0006367	transcription initiation from RNA polymerase II promoter	76	0	0.1	0.56739
GO:0043967	histone H4 acetylation	7	0	0.01	0.56739
GO:0034968	histone lysine methylation	52	0	0.07	0.56741
GO:0009827	plant-type cell wall modification	8	0	0.01	0.56744
GO:0055081	anion homeostasis	14	0	0.02	0.56777
GO:0070084	protein initiator methionine removal	8	0	0.01	0.56803
GO:0031325	positive regulation of cellular metabolic process	360	0	0.5	0.56852
GO:0016070	RNA metabolic process	4037	3	5.58	0.56913
GO:0051029	rRNA transport	10	0	0.01	0.56917
GO:0006407	rRNA export from nucleus	10	0	0.01	0.56917
GO:0043574	peroxisomal transport	28	0	0.04	0.56929
GO:0072662	protein localization to peroxisome	28	0	0.04	0.56929
GO:0072663	establishment of protein localization to peroxisome	28	0	0.04	0.56929
GO:0006625	protein targeting to peroxisome	28	0	0.04	0.56929
GO:0006310	DNA recombination	160	0	0.22	0.56967
GO:0010187	negative regulation of seed germination	13	0	0.02	0.57006
GO:0007034	vacuolar transport	81	0	0.11	0.57275
GO:0005996	monosaccharide metabolic process	369	1	0.51	0.57302
GO:1901699	cellular response to nitrogen compound	44	0	0.06	0.57412
GO:1902680	positive regulation of RNA biosynthetic process	177	0	0.24	0.5743
GO:0022603	regulation of anatomical structure morphogenesis	91	0	0.13	0.57453
GO:0098734	macromolecule depalmitoylation	16	0	0.02	0.57473
GO:0060260	regulation of transcription initiation from RNA polymerase II promoter	38	0	0.05	0.57486
GO:2000142	regulation of DNA-templated transcription, initiation	38	0	0.05	0.57486
GO:0000466	maturation of 5.8S rRNA from tricistronic rRNA transcript (SSU-rRNA, 5.8S rRNA, LSU-rRNA)	30	0	0.04	0.57487
GO:0007568	aging	67	0	0.09	0.57607
GO:0031053	primary miRNA processing	9	0	0.01	0.5767
GO:0007276	gamete generation	18	0	0.02	0.57683
GO:0048232	male gamete generation	18	0	0.02	0.57683
GO:0010207	photosystem II assembly	23	0	0.03	0.57703
GO:0006366	transcription from RNA polymerase II promoter	378	0	0.52	0.57715
GO:0051103	DNA ligation involved in DNA repair	10	0	0.01	0.57721
GO:0007165	signal transduction	1594	2	2.2	0.57756
GO:0006011	UDP-glucose metabolic process	6	0	0.01	0.57809
GO:0048468	cell development	106	0	0.15	0.57811
GO:1990267	response to transition metal nanoparticle	19	0	0.03	0.57813
GO:0009901	anther dehiscence	10	0	0.01	0.57862
GO:0009251	glucan catabolic process	80	0	0.11	0.57994
GO:0019725	cellular homeostasis	519	1	0.72	0.58016
GO:0048584	positive regulation of response to stimulus	69	0	0.1	0.58052
GO:0048440	carpel development	35	0	0.05	0.58131
GO:0048513	organ development	475	1	0.66	0.58169
GO:0005983	starch catabolic process	10	0	0.01	0.58195
GO:0006879	cellular iron ion homeostasis	29	0	0.04	0.58268
GO:0016051	carbohydrate biosynthetic process	352	0	0.49	0.58277
GO:0006475	internal protein amino acid acetylation	68	0	0.09	0.58336
GO:0030968	endoplasmic reticulum unfolded protein response	8	0	0.01	0.58363
GO:0006995	cellular response to nitrogen starvation	16	0	0.02	0.58379
GO:0010557	positive regulation of macromolecule biosynthetic process	227	0	0.31	0.58381
GO:0032210	regulation of telomere maintenance via telomerase	6	0	0.01	0.58447
GO:0033567	DNA replication, Okazaki fragment processing	9	0	0.01	0.58451
GO:0008033	tRNA processing	186	0	0.26	0.58575
GO:0048015	phosphatidylinositol-mediated signaling	6	0	0.01	0.58606
GO:0048017	inositol lipid-mediated signaling	6	0	0.01	0.58606
GO:0031125	rRNA 3'-end processing	22	0	0.03	0.58646
GO:0015977	carbon fixation	54	0	0.07	0.58689
GO:0097035	regulation of membrane lipid distribution	31	0	0.04	0.58693
GO:0034204	lipid translocation	31	0	0.04	0.58693
GO:0045332	phospholipid translocation	31	0	0.04	0.58693
GO:0018958	phenol-containing compound metabolic process	14	0	0.02	0.58711
GO:0016101	diterpenoid metabolic process	47	0	0.06	0.58724
GO:0045893	positive regulation of transcription, DNA-templated	174	0	0.24	0.58757
GO:0009992	cellular water homeostasis	57	1	0.08	0.58787
GO:0097503	sialylation	7	0	0.01	0.58811
GO:0018202	peptidyl-histidine modification	31	0	0.04	0.58845
GO:0006778	porphyrin-containing compound metabolic process	107	0	0.15	0.58847
GO:0016233	telomere capping	9	0	0.01	0.58864
GO:0010089	xylem development	18	0	0.02	0.58867
GO:0007017	microtubule-based process	302	0	0.42	0.58887
GO:0000266	mitochondrial fission	8	0	0.01	0.58912
GO:0051260	protein homooligomerization	16	0	0.02	0.58942
GO:0051603	proteolysis involved in cellular protein catabolic process	767	0	1.06	0.59058
GO:0015996	chlorophyll catabolic process	22	0	0.03	0.5907
GO:0046149	pigment catabolic process	22	0	0.03	0.5907
GO:0045037	protein import into chloroplast stroma	13	0	0.02	0.59128
GO:0009967	positive regulation of signal transduction	32	0	0.04	0.59184
GO:0023056	positive regulation of signaling	32	0	0.04	0.59184
GO:0001932	regulation of protein phosphorylation	103	0	0.14	0.59239
GO:0009793	embryo development ending in seed dormancy	177	0	0.24	0.59241
GO:0034728	nucleosome organization	98	0	0.14	0.59362
GO:0080135	regulation of cellular response to stress	28	0	0.04	0.5937
GO:0097576	vacuole fusion	11	0	0.02	0.59379
GO:0071396	cellular response to lipid	284	0	0.39	0.59397
GO:0044265	cellular macromolecule catabolic process	928	0	1.28	0.59484
GO:0035335	peptidyl-tyrosine dephosphorylation	50	0	0.07	0.59502
GO:2000021	regulation of ion homeostasis	18	0	0.02	0.59505
GO:0010043	response to zinc ion	18	0	0.02	0.59505
GO:0071033	nuclear retention of pre-mRNA at the site of transcription	7	0	0.01	0.59601
GO:0008298	intracellular mRNA localization	7	0	0.01	0.59601
GO:0034637	cellular carbohydrate biosynthetic process	233	0	0.32	0.59802
GO:0023052	signaling	1603	2	2.21	0.59885
GO:0044700	single organism signaling	1603	2	2.21	0.59885
GO:0072595	maintenance of protein localization in organelle	17	0	0.02	0.59914
GO:0006396	RNA processing	1136	0	1.57	0.59932
GO:0006857	oligopeptide transport	39	0	0.05	0.59934
GO:0042762	regulation of sulfur metabolic process	15	0	0.02	0.59962
GO:0051650	establishment of vesicle localization	12	0	0.02	0.60029
GO:0051648	vesicle localization	12	0	0.02	0.60029
GO:0072503	cellular divalent inorganic cation homeostasis	26	0	0.04	0.60058
GO:0009581	detection of external stimulus	26	0	0.04	0.60059
GO:0009582	detection of abiotic stimulus	26	0	0.04	0.60059
GO:0032269	negative regulation of cellular protein metabolic process	47	0	0.06	0.60094
GO:0051248	negative regulation of protein metabolic process	47	0	0.06	0.60094
GO:0042981	regulation of apoptotic process	9	0	0.01	0.60107
GO:0071103	DNA conformation change	202	0	0.28	0.60199
GO:0006207	'de novo' pyrimidine nucleobase biosynthetic process	19	0	0.03	0.60209
GO:0042343	indole glucosinolate metabolic process	11	0	0.02	0.6028
GO:0043408	regulation of MAPK cascade	31	0	0.04	0.60291
GO:0035268	protein mannosylation	8	0	0.01	0.60294
GO:0035269	protein O-linked mannosylation	8	0	0.01	0.60294
GO:0015713	phosphoglycerate transport	7	0	0.01	0.60329
GO:0010052	guard cell differentiation	17	0	0.02	0.60335
GO:0071826	ribonucleoprotein complex subunit organization	328	0	0.45	0.60418
GO:0051704	multi-organism process	499	1	0.69	0.60419
GO:0009753	response to jasmonic acid	53	0	0.07	0.60435
GO:0022618	ribonucleoprotein complex assembly	324	0	0.45	0.60504
GO:0046349	amino sugar biosynthetic process	10	0	0.01	0.60576
GO:0010035	response to inorganic substance	434	1	0.6	0.60614
GO:0006086	acetyl-CoA biosynthetic process from pyruvate	9	0	0.01	0.60629
GO:0006168	adenine salvage	6	0	0.01	0.60647
GO:0006282	regulation of DNA repair	11	0	0.02	0.60697
GO:0032957	inositol trisphosphate metabolic process	18	0	0.02	0.6073
GO:1900673	olefin metabolic process	40	0	0.06	0.60775
GO:1900674	olefin biosynthetic process	40	0	0.06	0.60775
GO:0043450	alkene biosynthetic process	40	0	0.06	0.60775
GO:0009692	ethylene metabolic process	40	0	0.06	0.60775
GO:0009693	ethylene biosynthetic process	40	0	0.06	0.60775
GO:0043449	cellular alkene metabolic process	40	0	0.06	0.60775
GO:0048645	organ formation	59	0	0.08	0.60948
GO:0006091	generation of precursor metabolites and energy	868	0	1.2	0.60972
GO:0098542	defense response to other organism	242	0	0.33	0.60985
GO:0010197	polar nucleus fusion	25	0	0.03	0.60989
GO:0009559	embryo sac central cell differentiation	25	0	0.03	0.60989
GO:0010190	cytochrome b6f complex assembly	14	0	0.02	0.6101
GO:0006342	chromatin silencing	69	0	0.1	0.61042
GO:0045814	negative regulation of gene expression, epigenetic	69	0	0.1	0.61042
GO:0000288	nuclear-transcribed mRNA catabolic process, deadenylation-dependent decay	47	0	0.06	0.6109
GO:0006986	response to unfolded protein	18	0	0.02	0.61125
GO:0032446	protein modification by small protein conjugation	653	0	0.9	0.6117
GO:0048588	developmental cell growth	43	0	0.06	0.6118
GO:0002097	tRNA wobble base modification	21	0	0.03	0.61223
GO:0002098	tRNA wobble uridine modification	21	0	0.03	0.61223
GO:0006073	cellular glucan metabolic process	288	1	0.4	0.61276
GO:0019860	uracil metabolic process	8	0	0.01	0.61282
GO:0051716	cellular response to stimulus	2441	7	3.37	0.61289
GO:0043687	post-translational protein modification	8	0	0.01	0.6139
GO:0035556	intracellular signal transduction	799	0	1.1	0.61418
GO:0006664	glycolipid metabolic process	79	0	0.11	0.61532
GO:0072506	trivalent inorganic anion homeostasis	12	0	0.02	0.61561
GO:0055062	phosphate ion homeostasis	12	0	0.02	0.61561
GO:0006265	DNA topological change	31	0	0.04	0.61585
GO:0010150	leaf senescence	28	0	0.04	0.61623
GO:0042159	lipoprotein catabolic process	14	0	0.02	0.61647
GO:0002084	protein depalmitoylation	14	0	0.02	0.61647
GO:0032501	multicellular organismal process	1475	3	2.04	0.6165
GO:0030104	water homeostasis	60	1	0.08	0.61689
GO:0052325	cell wall pectin biosynthetic process	8	0	0.01	0.61703
GO:0019220	regulation of phosphate metabolic process	338	0	0.47	0.61715
GO:0051174	regulation of phosphorus metabolic process	338	0	0.47	0.61715
GO:0006323	DNA packaging	119	0	0.16	0.61727
GO:0022402	cell cycle process	430	0	0.59	0.61885
GO:0009066	aspartate family amino acid metabolic process	122	1	0.17	0.61919
GO:0009408	response to heat	88	0	0.12	0.61927
GO:0051604	protein maturation	218	0	0.3	0.62008
GO:0071824	protein-DNA complex subunit organization	172	0	0.24	0.62041
GO:0031348	negative regulation of defense response	20	0	0.03	0.62064
GO:0016102	diterpenoid biosynthetic process	33	0	0.05	0.62136
GO:0008156	negative regulation of DNA replication	12	0	0.02	0.62149
GO:0030244	cellulose biosynthetic process	73	0	0.1	0.62234
GO:0080163	regulation of protein serine/threonine phosphatase activity	44	0	0.06	0.62259
GO:0045892	negative regulation of transcription, DNA-templated	126	0	0.17	0.62267
GO:1902679	negative regulation of RNA biosynthetic process	126	0	0.17	0.62267
GO:0051253	negative regulation of RNA metabolic process	126	0	0.17	0.62267
GO:0033353	S-adenosylmethionine cycle	10	0	0.01	0.62321
GO:0006476	protein deacetylation	25	0	0.03	0.62425
GO:2000280	regulation of root development	20	0	0.03	0.62461
GO:0080147	root hair cell development	18	0	0.02	0.62468
GO:0000724	double-strand break repair via homologous recombination	70	0	0.1	0.62491
GO:0000725	recombinational repair	70	0	0.1	0.62491
GO:0006334	nucleosome assembly	95	0	0.13	0.6261
GO:0016180	snRNA processing	16	0	0.02	0.62669
GO:0006570	tyrosine metabolic process	11	0	0.02	0.62671
GO:0009687	abscisic acid metabolic process	12	0	0.02	0.62681
GO:0065008	regulation of biological quality	1172	2	1.62	0.62687
GO:0044707	single-multicellular organism process	1439	3	1.99	0.62859
GO:0043647	inositol phosphate metabolic process	29	0	0.04	0.62918
GO:0001510	RNA methylation	95	0	0.13	0.62962
GO:0000301	retrograde transport, vesicle recycling within Golgi	16	0	0.02	0.62971
GO:0009635	response to herbicide	14	0	0.02	0.6301
GO:0042592	homeostatic process	730	1	1.01	0.63024
GO:0097306	cellular response to alcohol	250	0	0.35	0.63027
GO:0061088	regulation of sequestering of zinc ion	16	0	0.02	0.63041
GO:0032119	sequestering of zinc ion	16	0	0.02	0.63041
GO:0006882	cellular zinc ion homeostasis	16	0	0.02	0.63041
GO:0031324	negative regulation of cellular metabolic process	212	0	0.29	0.63083
GO:0017182	peptidyl-diphthamide metabolic process	7	0	0.01	0.63163
GO:0017183	peptidyl-diphthamide biosynthetic process from peptidyl-histidine	7	0	0.01	0.63163
GO:0006273	lagging strand elongation	22	0	0.03	0.63191
GO:0006338	chromatin remodeling	56	0	0.08	0.63192
GO:0032844	regulation of homeostatic process	26	0	0.04	0.63202
GO:0033692	cellular polysaccharide biosynthetic process	191	0	0.26	0.63207
GO:0000373	Group II intron splicing	21	0	0.03	0.63216
GO:0055082	cellular chemical homeostasis	298	1	0.41	0.63242
GO:2000028	regulation of photoperiodism, flowering	16	0	0.02	0.63257
GO:0009057	macromolecule catabolic process	1408	2	1.95	0.63326
GO:0045039	protein import into mitochondrial inner membrane	6	0	0.01	0.63348
GO:0009723	response to ethylene	125	0	0.17	0.63408
GO:0042256	mature ribosome assembly	11	0	0.02	0.63409
GO:0051173	positive regulation of nitrogen compound metabolic process	197	0	0.27	0.63444
GO:0045005	DNA-dependent DNA replication maintenance of fidelity	8	0	0.01	0.63485
GO:0006144	purine nucleobase metabolic process	42	0	0.06	0.63496
GO:0016024	CDP-diacylglycerol biosynthetic process	8	0	0.01	0.63564
GO:0046341	CDP-diacylglycerol metabolic process	8	0	0.01	0.63564
GO:0009311	oligosaccharide metabolic process	105	1	0.15	0.63572
GO:0071395	cellular response to jasmonic acid stimulus	46	0	0.06	0.63589
GO:0009867	jasmonic acid mediated signaling pathway	46	0	0.06	0.63589
GO:0006096	glycolytic process	123	0	0.17	0.63625
GO:0035404	histone-serine phosphorylation	7	0	0.01	0.6363
GO:0034661	ncRNA catabolic process	23	0	0.03	0.63644
GO:0006270	DNA replication initiation	34	0	0.05	0.63659
GO:0048564	photosystem I assembly	14	0	0.02	0.63666
GO:0009846	pollen germination	23	0	0.03	0.637
GO:0002682	regulation of immune system process	51	0	0.07	0.63702
GO:0007602	phototransduction	18	0	0.02	0.6375
GO:0009585	red, far-red light phototransduction	18	0	0.02	0.6375
GO:0010647	positive regulation of cell communication	34	0	0.05	0.63772
GO:0043414	macromolecule methylation	237	0	0.33	0.63806
GO:0006417	regulation of translation	151	0	0.21	0.6401
GO:0005984	disaccharide metabolic process	71	1	0.1	0.64112
GO:0048438	floral whorl development	73	0	0.1	0.64118
GO:0006084	acetyl-CoA metabolic process	19	0	0.03	0.64152
GO:0042304	regulation of fatty acid biosynthetic process	13	0	0.02	0.64224
GO:0090501	RNA phosphodiester bond hydrolysis	161	0	0.22	0.64242
GO:0043254	regulation of protein complex assembly	84	0	0.12	0.64248
GO:0016119	carotene metabolic process	12	0	0.02	0.64331
GO:0006884	cell volume homeostasis	59	1	0.08	0.64349
GO:0045859	regulation of protein kinase activity	100	0	0.14	0.64396
GO:0045926	negative regulation of growth	14	0	0.02	0.64475
GO:0090351	seedling development	83	0	0.11	0.64568
GO:0009404	toxin metabolic process	48	0	0.07	0.64573
GO:0010604	positive regulation of macromolecule metabolic process	352	0	0.49	0.64657
GO:0065004	protein-DNA complex assembly	169	0	0.23	0.64681
GO:0010038	response to metal ion	73	0	0.1	0.64698
GO:0016050	vesicle organization	197	0	0.27	0.64736
GO:0000972	transcription-dependent tethering of RNA polymerase II gene DNA at nuclear periphery	8	0	0.01	0.64768
GO:0034660	ncRNA metabolic process	668	0	0.92	0.64886
GO:0035246	peptidyl-arginine N-methylation	12	0	0.02	0.64901
GO:0035247	peptidyl-arginine omega-N-methylation	12	0	0.02	0.64901
GO:0034969	histone arginine methylation	12	0	0.02	0.64901
GO:0009642	response to light intensity	48	0	0.07	0.65091
GO:0034047	regulation of protein phosphatase type 2A activity	37	0	0.05	0.65238
GO:0051275	beta-glucan catabolic process	44	0	0.06	0.65242
GO:0016115	terpenoid catabolic process	24	0	0.03	0.65413
GO:0008300	isoprenoid catabolic process	24	0	0.03	0.65413
GO:0051186	cofactor metabolic process	446	0	0.62	0.65473
GO:0044087	regulation of cellular component biogenesis	112	0	0.15	0.6555
GO:0006075	(1->3)-beta-D-glucan biosynthetic process	27	0	0.04	0.65585
GO:0070681	glutaminyl-tRNAGln biosynthesis via transamidation	6	0	0.01	0.65608
GO:0048653	anther development	28	0	0.04	0.65618
GO:0006518	peptide metabolic process	151	0	0.21	0.65627
GO:0009147	pyrimidine nucleoside triphosphate metabolic process	36	0	0.05	0.65741
GO:0009887	organ morphogenesis	101	0	0.14	0.65746
GO:0016098	monoterpenoid metabolic process	7	0	0.01	0.65751
GO:0016099	monoterpenoid biosynthetic process	7	0	0.01	0.65751
GO:0009411	response to UV	36	0	0.05	0.65811
GO:0000245	spliceosomal complex assembly	34	0	0.05	0.65831
GO:0031123	RNA 3'-end processing	62	0	0.09	0.65831
GO:0031050	dsRNA fragmentation	42	0	0.06	0.65844
GO:0071359	cellular response to dsRNA	42	0	0.06	0.65844
GO:0043331	response to dsRNA	42	0	0.06	0.65844
GO:0070918	production of small RNA involved in gene silencing by RNA	42	0	0.06	0.65844
GO:0000154	rRNA modification	48	0	0.07	0.65872
GO:0030042	actin filament depolymerization	23	0	0.03	0.66009
GO:0051261	protein depolymerization	23	0	0.03	0.66009
GO:0015994	chlorophyll metabolic process	73	0	0.1	0.6603
GO:0007010	cytoskeleton organization	216	0	0.3	0.66065
GO:0071322	cellular response to carbohydrate stimulus	14	0	0.02	0.66065
GO:0048437	floral organ development	99	0	0.14	0.66209
GO:0051568	histone H3-K4 methylation	18	0	0.02	0.66337
GO:0008154	actin polymerization or depolymerization	51	0	0.07	0.66338
GO:0006869	lipid transport	104	1	0.14	0.66352
GO:0006915	apoptotic process	27	0	0.04	0.66359
GO:0016093	polyprenol metabolic process	12	0	0.02	0.66382
GO:0019348	dolichol metabolic process	12	0	0.02	0.66382
GO:0006783	heme biosynthetic process	36	0	0.05	0.66435
GO:0071027	nuclear RNA surveillance	14	0	0.02	0.6644
GO:0071028	nuclear mRNA surveillance	14	0	0.02	0.6644
GO:0071446	cellular response to salicylic acid stimulus	32	0	0.04	0.66456
GO:0009863	salicylic acid mediated signaling pathway	32	0	0.04	0.66456
GO:0030259	lipid glycosylation	11	0	0.02	0.66475
GO:0015793	glycerol transport	54	1	0.07	0.66527
GO:0048856	anatomical structure development	1266	3	1.75	0.66534
GO:0010628	positive regulation of gene expression	177	0	0.24	0.66557
GO:0048573	photoperiodism, flowering	37	0	0.05	0.66655
GO:0009860	pollen tube growth	28	0	0.04	0.66748
GO:0042157	lipoprotein metabolic process	74	0	0.1	0.6675
GO:0031349	positive regulation of defense response	30	0	0.04	0.66772
GO:0071479	cellular response to ionizing radiation	8	0	0.01	0.66781
GO:0006383	transcription from RNA polymerase III promoter	48	0	0.07	0.66788
GO:0046854	phosphatidylinositol phosphorylation	46	0	0.06	0.66801
GO:0046834	lipid phosphorylation	46	0	0.06	0.66801
GO:0044774	mitotic DNA integrity checkpoint	8	0	0.01	0.66866
GO:0044255	cellular lipid metabolic process	919	0	1.27	0.66957
GO:0007015	actin filament organization	71	0	0.1	0.67016
GO:0009751	response to salicylic acid	42	0	0.06	0.67032
GO:0055074	calcium ion homeostasis	18	0	0.02	0.67035
GO:0009737	response to abscisic acid	339	0	0.47	0.67082
GO:0006081	cellular aldehyde metabolic process	62	0	0.09	0.67129
GO:0006812	cation transport	1079	2	1.49	0.67203
GO:2001020	regulation of response to DNA damage stimulus	13	0	0.02	0.67218
GO:0019856	pyrimidine nucleobase biosynthetic process	23	0	0.03	0.67223
GO:0035670	plant-type ovary development	24	0	0.03	0.67227
GO:0048481	ovule development	24	0	0.03	0.67227
GO:0031425	chloroplast RNA processing	16	0	0.02	0.67239
GO:0071365	cellular response to auxin stimulus	142	0	0.2	0.67354
GO:0009734	auxin-activated signaling pathway	142	0	0.2	0.67354
GO:0010449	root meristem growth	13	0	0.02	0.67369
GO:0051246	regulation of protein metabolic process	439	0	0.61	0.67509
GO:0006566	threonine metabolic process	19	0	0.03	0.6755
GO:0051168	nuclear export	91	0	0.13	0.67566
GO:0048767	root hair elongation	15	0	0.02	0.67567
GO:0032544	plastid translation	10	0	0.01	0.67606
GO:0007219	Notch signaling pathway	6	0	0.01	0.67977
GO:0046168	glycerol-3-phosphate catabolic process	7	0	0.01	0.68093
GO:0046900	tetrahydrofolylpolyglutamate metabolic process	12	0	0.02	0.68111
GO:0006145	purine nucleobase catabolic process	15	0	0.02	0.68127
GO:0010135	ureide metabolic process	6	0	0.01	0.68145
GO:0010136	ureide catabolic process	6	0	0.01	0.68145
GO:0048572	short-day photoperiodism	8	0	0.01	0.68227
GO:0048575	short-day photoperiodism, flowering	8	0	0.01	0.68227
GO:0019253	reductive pentose-phosphate cycle	37	0	0.05	0.6825
GO:0019685	photosynthesis, dark reaction	37	0	0.05	0.6825
GO:0032989	cellular component morphogenesis	244	0	0.34	0.68266
GO:0010927	cellular component assembly involved in morphogenesis	38	0	0.05	0.68357
GO:0010208	pollen wall assembly	38	0	0.05	0.68357
GO:0046037	GMP metabolic process	12	0	0.02	0.68452
GO:0031401	positive regulation of protein modification process	80	0	0.11	0.68463
GO:1901698	response to nitrogen compound	62	0	0.09	0.68521
GO:0043604	amide biosynthetic process	59	1	0.08	0.68549
GO:0000226	microtubule cytoskeleton organization	119	0	0.16	0.68571
GO:0043632	modification-dependent macromolecule catabolic process	625	0	0.86	0.68618
GO:0016226	iron-sulfur cluster assembly	59	0	0.08	0.68636
GO:0031163	metallo-sulfur cluster assembly	59	0	0.08	0.68636
GO:0006903	vesicle targeting	11	0	0.02	0.68686
GO:0048199	vesicle targeting, to, from or within Golgi	11	0	0.02	0.68686
GO:0007275	multicellular organismal development	1341	3	1.85	0.68689
GO:0051129	negative regulation of cellular component organization	43	0	0.06	0.68708
GO:0010639	negative regulation of organelle organization	43	0	0.06	0.68708
GO:0043650	dicarboxylic acid biosynthetic process	38	0	0.05	0.68734
GO:0033015	tetrapyrrole catabolic process	26	0	0.04	0.6874
GO:0006787	porphyrin-containing compound catabolic process	26	0	0.04	0.6874
GO:0072350	tricarboxylic acid metabolic process	10	0	0.01	0.68744
GO:0009653	anatomical structure morphogenesis	472	1	0.65	0.68807
GO:0051084	'de novo' posttranslational protein folding	11	0	0.02	0.68841
GO:0051085	chaperone mediated protein folding requiring cofactor	11	0	0.02	0.68841
GO:0006458	'de novo' protein folding	11	0	0.02	0.68841
GO:0034508	centromere complex assembly	6	0	0.01	0.68873
GO:0006479	protein methylation	115	0	0.16	0.68891
GO:0008213	protein alkylation	115	0	0.16	0.68891
GO:0006266	DNA ligation	13	0	0.02	0.68939
GO:0045787	positive regulation of cell cycle	18	0	0.02	0.69031
GO:0009266	response to temperature stimulus	160	0	0.22	0.69056
GO:0048598	embryonic morphogenesis	8	0	0.01	0.69125
GO:0006432	phenylalanyl-tRNA aminoacylation	8	0	0.01	0.69128
GO:0051273	beta-glucan metabolic process	144	0	0.2	0.69197
GO:0008380	RNA splicing	311	0	0.43	0.69222
GO:0016103	diterpenoid catabolic process	15	0	0.02	0.69258
GO:0018106	peptidyl-histidine phosphorylation	24	0	0.03	0.69336
GO:0007006	mitochondrial membrane organization	25	0	0.03	0.69359
GO:0044843	cell cycle G1/S phase transition	15	0	0.02	0.6936
GO:0048585	negative regulation of response to stimulus	104	0	0.14	0.69364
GO:0006090	pyruvate metabolic process	150	0	0.21	0.69385
GO:0035383	thioester metabolic process	73	0	0.1	0.69399
GO:0006637	acyl-CoA metabolic process	73	0	0.1	0.69399
GO:0035337	fatty-acyl-CoA metabolic process	44	0	0.06	0.69434
GO:1900865	chloroplast RNA modification	7	0	0.01	0.69457
GO:0003006	developmental process involved in reproduction	622	2	0.86	0.69464
GO:2000241	regulation of reproductive process	120	0	0.17	0.69545
GO:0018342	protein prenylation	14	0	0.02	0.69576
GO:0097354	prenylation	14	0	0.02	0.69576
GO:0009699	phenylpropanoid biosynthetic process	123	0	0.17	0.69629
GO:0010104	regulation of ethylene-activated signaling pathway	50	0	0.07	0.6967
GO:0070297	regulation of phosphorelay signal transduction system	50	0	0.07	0.6967
GO:0048583	regulation of response to stimulus	382	0	0.53	0.69694
GO:0046283	anthocyanin-containing compound metabolic process	20	0	0.03	0.69699
GO:0033036	macromolecule localization	1117	1	1.54	0.69798
GO:0000451	rRNA 2'-O-methylation	7	0	0.01	0.69914
GO:0000453	enzyme-directed rRNA 2'-O-methylation	7	0	0.01	0.69914
GO:0006271	DNA strand elongation involved in DNA replication	26	0	0.04	0.69965
GO:0022616	DNA strand elongation	26	0	0.04	0.69965
GO:0009407	toxin catabolic process	44	0	0.06	0.6997
GO:0090487	secondary metabolite catabolic process	44	0	0.06	0.6997
GO:0042214	terpene metabolic process	24	0	0.03	0.69999
GO:0051651	maintenance of location in cell	37	0	0.05	0.70025
GO:0009682	induced systemic resistance	6	0	0.01	0.70044
GO:0009909	regulation of flower development	76	0	0.1	0.70201
GO:0046620	regulation of organ growth	18	0	0.02	0.70222
GO:0015860	purine nucleoside transmembrane transport	13	0	0.02	0.70235
GO:0042439	ethanolamine-containing compound metabolic process	31	0	0.04	0.7036
GO:0010092	specification of organ identity	10	0	0.01	0.70413
GO:0010093	specification of floral organ identity	10	0	0.01	0.70413
GO:0009834	plant-type secondary cell wall biogenesis	33	0	0.05	0.70451
GO:2000758	positive regulation of peptidyl-lysine acetylation	15	0	0.02	0.70475
GO:1901985	positive regulation of protein acetylation	15	0	0.02	0.70475
GO:0035066	positive regulation of histone acetylation	15	0	0.02	0.70475
GO:0006984	ER-nucleus signaling pathway	10	0	0.01	0.70496
GO:0070475	rRNA base methylation	14	0	0.02	0.70498
GO:0035493	SNARE complex assembly	18	0	0.02	0.70503
GO:0009113	purine nucleobase biosynthetic process	24	0	0.03	0.70515
GO:0071941	nitrogen cycle metabolic process	22	0	0.03	0.70529
GO:0021700	developmental maturation	68	0	0.09	0.70537
GO:0008610	lipid biosynthetic process	707	0	0.98	0.70583
GO:1902532	negative regulation of intracellular signal transduction	8	0	0.01	0.70602
GO:0043407	negative regulation of MAP kinase activity	8	0	0.01	0.70602
GO:0043409	negative regulation of MAPK cascade	8	0	0.01	0.70602
GO:0006508	proteolysis	1435	0	1.98	0.7065
GO:0009926	auxin polar transport	48	0	0.07	0.70659
GO:0006401	RNA catabolic process	133	0	0.18	0.70722
GO:0042325	regulation of phosphorylation	110	0	0.15	0.70784
GO:0010629	negative regulation of gene expression	193	0	0.27	0.70818
GO:0030245	cellulose catabolic process	37	0	0.05	0.70945
GO:0045935	positive regulation of nucleobase-containing compound metabolic process	193	0	0.27	0.70964
[truncated: 2,565 more rows]

## Sheet: turquoise
Supplementary Table 8. GO analysis of DEGs of modules.
BP
GO.ID	Term	Annotated	Significant	Expected	KS
GO:0006301	postreplication repair	20	5	0.32	0.00016
GO:0009765	photosynthesis, light harvesting	112	1	1.79	0.00021
GO:0000911	cytokinesis by cell plate formation	44	2	0.7	0.00127
GO:0006457	protein folding	404	6	6.47	0.00134
GO:0017157	regulation of exocytosis	10	0	0.16	0.0015
GO:0008356	asymmetric cell division	11	2	0.18	0.00198
GO:1902600	hydrogen ion transmembrane transport	442	0	7.07	0.00242
GO:0010087	phloem or xylem histogenesis	44	4	0.7	0.00324
GO:0006595	polyamine metabolic process	49	3	0.78	0.00393
GO:0071897	DNA biosynthetic process	50	6	0.8	0.00433
GO:0010305	leaf vascular tissue pattern formation	18	3	0.29	0.00469
GO:0051307	meiotic chromosome separation	16	0	0.26	0.00577
GO:0010540	basipetal auxin transport	7	2	0.11	0.00627
GO:0046274	lignin catabolic process	49	0	0.78	0.00664
GO:0043622	cortical microtubule organization	6	0	0.1	0.00756
GO:0006272	leading strand elongation	6	3	0.1	0.00817
GO:0055085	transmembrane transport	2027	22	32.44	0.00835
GO:0009902	chloroplast relocation	30	2	0.48	0.00877
GO:0006165	nucleoside diphosphate phosphorylation	13	1	0.21	0.00905
GO:0006183	GTP biosynthetic process	13	1	0.21	0.00905
GO:0006228	UTP biosynthetic process	13	1	0.21	0.00905
GO:0009115	xanthine catabolic process	9	0	0.14	0.00919
GO:0009637	response to blue light	17	2	0.27	0.0092
GO:0044267	cellular protein metabolic process	6165	69	98.66	0.00996
GO:0071554	cell wall organization or biogenesis	810	31	12.96	0.01008
GO:0009309	amine biosynthetic process	77	4	1.23	0.01043
GO:0042401	cellular biogenic amine biosynthetic process	77	4	1.23	0.01043
GO:1902115	regulation of organelle assembly	10	0	0.16	0.01056
GO:0010603	regulation of cytoplasmic mRNA processing body assembly	10	0	0.16	0.01056
GO:0030433	ER-associated ubiquitin-dependent protein catabolic process	55	0	0.88	0.01067
GO:0009870	defense response signaling pathway, resistance gene-dependent	13	0	0.21	0.01171
GO:0098656	anion transmembrane transport	269	7	4.3	0.01306
GO:0046942	carboxylic acid transport	208	5	3.33	0.01353
GO:0015849	organic acid transport	208	5	3.33	0.01353
GO:0006596	polyamine biosynthetic process	44	3	0.7	0.01488
GO:0000272	polysaccharide catabolic process	309	12	4.94	0.0157
GO:0033387	putrescine biosynthetic process from ornithine	7	1	0.11	0.01702
GO:0006740	NADPH regeneration	49	0	0.78	0.01795
GO:0006098	pentose-phosphate shunt	49	0	0.78	0.01795
GO:0009052	pentose-phosphate shunt, non-oxidative branch	16	0	0.26	0.01873
GO:0030150	protein import into mitochondrial matrix	40	0	0.64	0.0198
GO:0032958	inositol phosphate biosynthetic process	6	0	0.1	0.02048
GO:0009100	glycoprotein metabolic process	155	3	2.48	0.02056
GO:0009101	glycoprotein biosynthetic process	155	3	2.48	0.02056
GO:0006835	dicarboxylic acid transport	47	0	0.75	0.02064
GO:0071103	DNA conformation change	202	20	3.23	0.02089
GO:0009903	chloroplast avoidance movement	19	2	0.3	0.02123
GO:0006865	amino acid transport	145	5	2.32	0.02188
GO:0006556	S-adenosylmethionine biosynthetic process	18	0	0.29	0.02242
GO:0034220	ion transmembrane transport	1090	12	17.44	0.0227
GO:0042775	mitochondrial ATP synthesis coupled electron transport	53	0	0.85	0.0237
GO:0006298	mismatch repair	24	4	0.38	0.02391
GO:0006887	exocytosis	173	2	2.77	0.02414
GO:0006730	one-carbon metabolic process	72	0	1.15	0.02464
GO:0070085	glycosylation	170	3	2.72	0.0248
GO:0015740	C4-dicarboxylate transport	29	0	0.46	0.0249
GO:0010496	intercellular transport	21	0	0.34	0.0257
GO:0006607	NLS-bearing protein import into nucleus	30	2	0.48	0.02621
GO:0010218	response to far red light	9	2	0.14	0.02688
GO:0015743	malate transport	27	0	0.43	0.02694
GO:0006732	coenzyme metabolic process	332	0	5.31	0.0278
GO:0046836	glycolipid transport	9	0	0.14	0.02867
GO:0006591	ornithine metabolic process	18	1	0.29	0.03011
GO:0009631	cold acclimation	15	0	0.24	0.03059
GO:0000712	resolution of meiotic recombination intermediates	12	0	0.19	0.03095
GO:0030010	establishment of cell polarity	7	0	0.11	0.03129
GO:0007163	establishment or maintenance of cell polarity	7	0	0.11	0.03129
GO:0006323	DNA packaging	119	15	1.9	0.03193
GO:0006334	nucleosome assembly	95	14	1.52	0.03205
GO:0046034	ATP metabolic process	455	0	7.28	0.03316
GO:0045490	pectin catabolic process	150	4	2.4	0.0333
GO:0042451	purine nucleoside biosynthetic process	325	1	5.2	0.03337
GO:0046129	purine ribonucleoside biosynthetic process	325	1	5.2	0.03337
GO:0030091	protein repair	36	1	0.58	0.0339
GO:0042546	cell wall biogenesis	185	11	2.96	0.03419
GO:0042274	ribosomal small subunit biogenesis	191	3	3.06	0.03424
GO:0046835	carbohydrate phosphorylation	52	4	0.83	0.03432
GO:0006486	protein glycosylation	147	3	2.35	0.03495
GO:0043413	macromolecule glycosylation	147	3	2.35	0.03495
GO:0009082	branched-chain amino acid biosynthetic process	36	0	0.58	0.03598
GO:0032940	secretion by cell	187	2	2.99	0.03611
GO:0010411	xyloglucan metabolic process	63	8	1.01	0.03617
GO:0034728	nucleosome organization	98	14	1.57	0.03633
GO:0009065	glutamine family amino acid catabolic process	13	2	0.21	0.03649
GO:0009904	chloroplast accumulation movement	22	2	0.35	0.0377
GO:0006972	hyperosmotic response	24	0	0.38	0.03864
GO:0006739	NADP metabolic process	53	0	0.85	0.03865
GO:0046128	purine ribonucleoside metabolic process	718	3	11.49	0.03907
GO:0042255	ribosome assembly	169	3	2.7	0.04046
GO:0009059	macromolecule biosynthetic process	4948	90	79.18	0.0413
GO:0000710	meiotic mismatch repair	11	0	0.18	0.04149
GO:0010951	negative regulation of endopeptidase activity	53	5	0.85	0.04196
GO:0052548	regulation of endopeptidase activity	53	5	0.85	0.04196
GO:0010204	defense response signaling pathway, resistance gene-independent	10	0	0.16	0.04196
GO:0009162	deoxyribonucleoside monophosphate metabolic process	11	3	0.18	0.04216
GO:0009157	deoxyribonucleoside monophosphate biosynthetic process	11	3	0.18	0.04216
GO:0006544	glycine metabolic process	37	2	0.59	0.04292
GO:0008616	queuosine biosynthetic process	15	0	0.24	0.04298
GO:0046116	queuosine metabolic process	15	0	0.24	0.04298
GO:0042545	cell wall modification	123	4	1.97	0.04301
GO:0006163	purine nucleotide metabolic process	705	3	11.28	0.0435
GO:0031497	chromatin assembly	103	14	1.65	0.04404
GO:0006108	malate metabolic process	47	1	0.75	0.04521
GO:0034050	host programmed cell death induced by symbiont	37	0	0.59	0.04551
GO:0009626	plant-type hypersensitive response	37	0	0.59	0.04551
GO:0009144	purine nucleoside triphosphate metabolic process	592	3	9.47	0.04682
GO:0000060	protein import into nucleus, translocation	14	0	0.22	0.04738
GO:0006610	ribosomal protein import into nucleus	14	0	0.22	0.04738
GO:0042989	sequestering of actin monomers	9	1	0.14	0.04793
GO:0000027	ribosomal large subunit assembly	87	0	1.39	0.0489
GO:0046451	diaminopimelate metabolic process	21	0	0.34	0.04958
GO:0009085	lysine biosynthetic process	21	0	0.34	0.04958
GO:0009089	lysine biosynthetic process via diaminopimelate	21	0	0.34	0.04958
GO:0071555	cell wall organization	550	26	8.8	0.04959
GO:0007389	pattern specification process	109	6	1.74	0.05026
GO:0007059	chromosome segregation	87	2	1.39	0.05143
GO:0017004	cytochrome complex assembly	124	0	1.98	0.05155
GO:0009141	nucleoside triphosphate metabolic process	622	5	9.95	0.05297
GO:0006164	purine nucleotide biosynthetic process	327	1	5.23	0.0531
GO:0000122	negative regulation of transcription from RNA polymerase II promoter	12	1	0.19	0.05315
GO:0010410	hemicellulose metabolic process	113	9	1.81	0.0532
GO:0046500	S-adenosylmethionine metabolic process	31	0	0.5	0.05322
GO:0009205	purine ribonucleoside triphosphate metabolic process	589	3	9.43	0.0534
GO:0098661	inorganic anion transmembrane transport	58	1	0.93	0.05401
GO:0006333	chromatin assembly or disassembly	109	14	1.74	0.05421
GO:0006542	glutamine biosynthetic process	9	1	0.14	0.05539
GO:0009150	purine ribonucleotide metabolic process	698	3	11.17	0.05614
GO:0005976	polysaccharide metabolic process	635	24	10.16	0.05617
GO:0000304	response to singlet oxygen	10	0	0.16	0.05621
GO:0009942	longitudinal axis specification	9	2	0.14	0.05641
GO:0000578	embryonic axis specification	9	2	0.14	0.05641
GO:0072522	purine-containing compound biosynthetic process	372	1	5.95	0.05676
GO:0000469	cleavage involved in rRNA processing	34	1	0.54	0.05725
GO:0006527	arginine catabolic process	6	1	0.1	0.05944
GO:0006893	Golgi to plasma membrane transport	13	0	0.21	0.05957
GO:0015807	L-amino acid transport	31	0	0.5	0.05964
GO:0006842	tricarboxylic acid transport	11	0	0.18	0.06001
GO:0045229	external encapsulating structure organization	588	26	9.41	0.06135
GO:0009251	glucan catabolic process	80	8	1.28	0.06156
GO:0042147	retrograde transport, endosome to Golgi	31	0	0.5	0.06165
GO:0010506	regulation of autophagy	12	0	0.19	0.06173
GO:0034645	cellular macromolecule biosynthetic process	4856	88	77.71	0.06189
GO:0018201	peptidyl-glycine modification	9	0	0.14	0.06276
GO:0018008	N-terminal peptidyl-glycine N-myristoylation	9	0	0.14	0.06276
GO:0009733	response to auxin	335	14	5.36	0.06292
GO:0071423	malate transmembrane transport	18	0	0.29	0.06292
GO:0007005	mitochondrion organization	201	1	3.22	0.063
GO:0009097	isoleucine biosynthetic process	22	0	0.35	0.06312
GO:0006549	isoleucine metabolic process	22	0	0.35	0.06312
GO:0040011	locomotion	18	1	0.29	0.06323
GO:0010311	lateral root formation	24	0	0.38	0.0633
GO:0009152	purine ribonucleotide biosynthetic process	325	1	5.2	0.06333
GO:1901137	carbohydrate derivative biosynthetic process	687	6	10.99	0.06346
GO:0031023	microtubule organizing center organization	26	1	0.42	0.06351
GO:0042278	purine nucleoside metabolic process	726	3	11.62	0.06355
GO:0071051	polyadenylation-dependent snoRNA 3'-end processing	9	0	0.14	0.06522
GO:0016074	snoRNA metabolic process	9	0	0.14	0.06522
GO:0031126	snoRNA 3'-end processing	9	0	0.14	0.06522
GO:0043144	snoRNA processing	9	0	0.14	0.06522
GO:0006346	methylation-dependent chromatin silencing	9	1	0.14	0.06573
GO:0010497	plasmodesmata-mediated intercellular transport	11	0	0.18	0.06601
GO:0042254	ribosome biogenesis	602	8	9.63	0.06655
GO:0010467	gene expression	5459	75	87.36	0.06667
GO:0009768	photosynthesis, light harvesting in photosystem I	42	0	0.67	0.06683
GO:0016197	endosomal transport	65	0	1.04	0.06863
GO:0006303	double-strand break repair via nonhomologous end joining	14	0	0.22	0.06981
GO:0000726	non-recombinational repair	14	0	0.22	0.06981
GO:0050789	regulation of biological process	5123	107	81.98	0.07188
GO:0046903	secretion	191	2	3.06	0.07273
GO:0044699	single-organism process	13784	222	220.58	0.07329
GO:0006553	lysine metabolic process	22	0	0.35	0.0734
GO:0009308	amine metabolic process	195	4	3.12	0.07373
GO:0010466	negative regulation of peptidase activity	55	5	0.88	0.07428
GO:0052547	regulation of peptidase activity	55	5	0.88	0.07428
GO:0036297	interstrand cross-link repair	7	0	0.11	0.07432
GO:0009875	pollen-pistil interaction	65	2	1.04	0.0744
GO:0009446	putrescine biosynthetic process	19	1	0.3	0.07481
GO:1901657	glycosyl compound metabolic process	853	6	13.65	0.07489
GO:0010030	positive regulation of seed germination	6	0	0.1	0.07501
GO:0006007	glucose catabolic process	53	0	0.85	0.07505
GO:0043648	dicarboxylic acid metabolic process	174	2	2.78	0.07574
GO:0000919	cell plate assembly	14	0	0.22	0.07584
GO:0005978	glycogen biosynthetic process	19	0	0.3	0.07621
GO:0010039	response to iron ion	20	0	0.32	0.0771
GO:0009880	embryonic pattern specification	16	2	0.26	0.07723
GO:0003333	amino acid transmembrane transport	130	5	2.08	0.07749
GO:0051346	negative regulation of hydrolase activity	64	5	1.02	0.07759
GO:0006289	nucleotide-excision repair	45	0	0.72	0.07775
GO:0044042	glucan metabolic process	305	19	4.88	0.07785
GO:0051181	cofactor transport	79	0	1.26	0.07875
GO:0003002	regionalization	91	6	1.46	0.07899
GO:0009119	ribonucleoside metabolic process	770	3	12.32	0.07907
GO:0031935	regulation of chromatin silencing	13	0	0.21	0.07961
GO:0009199	ribonucleoside triphosphate metabolic process	605	3	9.68	0.08027
GO:0050776	regulation of immune response	43	0	0.69	0.08045
GO:0045088	regulation of innate immune response	43	0	0.69	0.08045
GO:0007067	mitotic nuclear division	95	4	1.52	0.08074
GO:0030245	cellulose catabolic process	37	5	0.59	0.0818
GO:0010143	cutin biosynthetic process	27	2	0.43	0.0835
GO:0051275	beta-glucan catabolic process	44	6	0.7	0.08351
GO:0051103	DNA ligation involved in DNA repair	10	2	0.16	0.08429
GO:0009168	purine ribonucleoside monophosphate biosynthetic process	278	0	4.45	0.08464
GO:0009127	purine nucleoside monophosphate biosynthetic process	278	0	4.45	0.08464
GO:0009611	response to wounding	58	3	0.93	0.08517
GO:0009725	response to hormone	977	23	15.63	0.08605
GO:0045488	pectin metabolic process	193	4	3.09	0.08624
GO:0010393	galacturonan metabolic process	193	4	3.09	0.08624
GO:0010343	singlet oxygen-mediated programmed cell death	9	0	0.14	0.08706
GO:0071452	cellular response to singlet oxygen	9	0	0.14	0.08706
GO:0036473	cell death in response to oxidative stress	9	0	0.14	0.08706
GO:0097468	programmed cell death in response to reactive oxygen species	9	0	0.14	0.08706
GO:1901135	carbohydrate derivative metabolic process	1298	10	20.77	0.08743
GO:0043137	DNA replication, removal of RNA primer	6	1	0.1	0.08745
GO:1901678	iron coordination entity transport	66	0	1.06	0.08759
GO:0015886	heme transport	66	0	1.06	0.08759
GO:0009719	response to endogenous stimulus	980	23	15.68	0.08892
GO:0010033	response to organic substance	1086	27	17.38	0.08894
GO:0044036	cell wall macromolecule metabolic process	167	9	2.67	0.08942
GO:0042816	vitamin B6 metabolic process	11	0	0.18	0.08973
GO:0042819	vitamin B6 biosynthetic process	11	0	0.18	0.08973
GO:0009116	nucleoside metabolic process	808	4	12.93	0.09032
GO:0009800	cinnamic acid biosynthetic process	18	0	0.29	0.09164
GO:0009803	cinnamic acid metabolic process	18	0	0.29	0.09164
GO:0016117	carotenoid biosynthetic process	41	0	0.66	0.09173
GO:0016109	tetraterpenoid biosynthetic process	41	0	0.66	0.09173
GO:0070585	protein localization to mitochondrion	82	0	1.31	0.09236
GO:0072655	establishment of protein localization to mitochondrion	82	0	1.31	0.09236
GO:0006626	protein targeting to mitochondrion	82	0	1.31	0.09236
GO:0018298	protein-chromophore linkage	150	1	2.4	0.09331
GO:1902593	single-organism nuclear import	90	2	1.44	0.09332
GO:0044744	protein targeting to nucleus	90	2	1.44	0.09332
GO:0051170	nuclear import	90	2	1.44	0.09332
GO:0006606	protein import into nucleus	90	2	1.44	0.09332
GO:0033609	oxalate metabolic process	38	0	0.61	0.09371
GO:0002181	cytoplasmic translation	131	3	2.1	0.09381
GO:0060968	regulation of gene silencing	20	0	0.32	0.09449
GO:0071669	plant-type cell wall organization or biogenesis	271	15	4.34	0.09518
GO:0042538	hyperosmotic salinity response	21	0	0.34	0.09543
GO:0072521	purine-containing compound metabolic process	797	3	12.75	0.09705
GO:0009639	response to red or far red light	79	2	1.26	0.09871
GO:0072524	pyridine-containing compound metabolic process	94	0	1.5	0.0991
GO:0090002	establishment of protein localization to plasma membrane	7	0	0.11	0.09919
GO:0043001	Golgi to plasma membrane protein transport	7	0	0.11	0.09919
GO:0007009	plasma membrane organization	7	0	0.11	0.09919
GO:0072659	protein localization to plasma membrane	7	0	0.11	0.09919
GO:0009167	purine ribonucleoside monophosphate metabolic process	509	0	8.15	0.10032
GO:0009126	purine nucleoside monophosphate metabolic process	509	0	8.15	0.10032
GO:0071822	protein complex subunit organization	730	21	11.68	0.10041
GO:0008037	cell recognition	63	1	1.01	0.10058
GO:0048544	recognition of pollen	63	1	1.01	0.10058
GO:0006461	protein complex assembly	589	17	9.43	0.10127
GO:0042273	ribosomal large subunit biogenesis	184	1	2.94	0.10146
GO:0045903	positive regulation of translational fidelity	25	0	0.4	0.10202
GO:0007051	spindle organization	54	3	0.86	0.10289
GO:0090116	C-5 methylation of cytosine	7	1	0.11	0.10302
GO:0032776	DNA methylation on cytosine	7	1	0.11	0.10302
GO:0006351	transcription, DNA-templated	2543	54	40.7	0.10307
GO:0018377	protein myristoylation	10	0	0.16	0.1037
GO:0006498	N-terminal protein lipidation	10	0	0.16	0.1037
GO:0006499	N-terminal protein myristoylation	10	0	0.16	0.1037
GO:0019752	carboxylic acid metabolic process	1805	23	28.88	0.10458
GO:0046040	IMP metabolic process	35	0	0.56	0.10467
GO:0019637	organophosphate metabolic process	1317	6	21.08	0.10482
GO:0048527	lateral root development	37	2	0.59	0.10509
GO:0010431	seed maturation	40	0	0.64	0.10522
GO:0007265	Ras protein signal transduction	26	0	0.42	0.10537
GO:0046578	regulation of Ras protein signal transduction	26	0	0.42	0.10537
GO:0051056	regulation of small GTPase mediated signal transduction	26	0	0.42	0.10537
GO:0032011	ARF protein signal transduction	26	0	0.42	0.10537
GO:0032012	regulation of ARF protein signal transduction	26	0	0.42	0.10537
GO:0006979	response to oxidative stress	400	11	6.4	0.10552
GO:0060249	anatomical structure homeostasis	41	0	0.66	0.1062
GO:0009718	anthocyanin-containing compound biosynthetic process	13	2	0.21	0.10633
GO:0009820	alkaloid metabolic process	6	0	0.1	0.10718
GO:0009821	alkaloid biosynthetic process	6	0	0.1	0.10718
GO:0009124	nucleoside monophosphate biosynthetic process	315	3	5.04	0.10721
GO:0016116	carotenoid metabolic process	47	0	0.75	0.10824
GO:0016108	tetraterpenoid metabolic process	47	0	0.75	0.10824
GO:2000896	amylopectin metabolic process	7	0	0.11	0.10838
GO:0010021	amylopectin biosynthetic process	7	0	0.11	0.10838
GO:0048528	post-embryonic root development	41	2	0.66	0.10842
GO:0044000	movement in host	15	0	0.24	0.10855
GO:0051814	movement in other organism involved in symbiotic interaction	15	0	0.24	0.10855
GO:0052192	movement in environment of other organism involved in symbiotic interaction	15	0	0.24	0.10855
GO:0052126	movement in host environment	15	0	0.24	0.10855
GO:0044766	multi-organism transport	15	0	0.24	0.10855
GO:0046794	transport of virus	15	0	0.24	0.10855
GO:0046739	transport of virus in multicellular host	15	0	0.24	0.10855
GO:0022610	biological adhesion	11	0	0.18	0.10887
GO:0007155	cell adhesion	11	0	0.18	0.10887
GO:0071365	cellular response to auxin stimulus	142	13	2.27	0.10892
GO:0009734	auxin-activated signaling pathway	142	13	2.27	0.10892
GO:0006273	lagging strand elongation	22	3	0.35	0.10902
GO:0070887	cellular response to chemical stimulus	898	30	14.37	0.10906
GO:0010332	response to gamma radiation	10	0	0.16	0.11162
GO:0010231	maintenance of seed dormancy	8	0	0.13	0.11187
GO:0097437	maintenance of dormancy	8	0	0.13	0.11187
GO:0001927	exocyst assembly	11	0	0.18	0.11207
GO:0032774	RNA biosynthetic process	2556	54	40.9	0.11217
GO:0009123	nucleoside monophosphate metabolic process	546	3	8.74	0.11221
GO:0070271	protein complex biogenesis	591	17	9.46	0.1123
GO:0018108	peptidyl-tyrosine phosphorylation	48	0	0.77	0.11242
GO:0018212	peptidyl-tyrosine modification	48	0	0.77	0.11242
GO:0000187	activation of MAPK activity	7	0	0.11	0.11318
GO:1902533	positive regulation of intracellular signal transduction	7	0	0.11	0.11318
GO:0043410	positive regulation of MAPK cascade	7	0	0.11	0.11318
GO:0043406	positive regulation of MAP kinase activity	7	0	0.11	0.11318
GO:0065007	biological regulation	5802	123	92.85	0.11349
GO:0042221	response to chemical	1691	40	27.06	0.11375
GO:0080050	regulation of seed development	18	0	0.29	0.1146
GO:0009445	putrescine metabolic process	20	1	0.32	0.11558
GO:0006733	oxidoreduction coenzyme metabolic process	95	0	1.52	0.11591
GO:0051171	regulation of nitrogen compound metabolic process	2251	55	36.02	0.11633
GO:0032200	telomere organization	39	0	0.62	0.11659
GO:0000723	telomere maintenance	39	0	0.62	0.11659
GO:0019222	regulation of metabolic process	3157	75	50.52	0.11731
GO:0015698	inorganic anion transport	147	2	2.35	0.11823
GO:0015936	coenzyme A metabolic process	42	0	0.67	0.11843
GO:0098586	cellular response to virus	6	0	0.1	0.11848
GO:0046653	tetrahydrofolate metabolic process	34	0	0.54	0.11874
GO:0017038	protein import	193	2	3.09	0.11887
GO:0010383	cell wall polysaccharide metabolic process	123	9	1.97	0.11889
GO:0051601	exocyst localization	15	0	0.24	0.11901
GO:0032509	endosome transport via multivesicular body sorting pathway	15	0	0.24	0.11938
GO:0006435	threonyl-tRNA aminoacylation	7	0	0.11	0.12137
GO:0044085	cellular component biogenesis	1695	38	27.12	0.12183
GO:0006189	'de novo' IMP biosynthetic process	28	0	0.45	0.12197
GO:0051301	cell division	433	14	6.93	0.12269
GO:0006261	DNA-dependent DNA replication	122	12	1.95	0.1241
GO:0000105	histidine biosynthetic process	16	0	0.26	0.12514
GO:0052803	imidazole-containing compound metabolic process	16	0	0.26	0.12514
GO:0006547	histidine metabolic process	16	0	0.26	0.12514
GO:0043091	L-arginine import	10	0	0.16	0.12539
GO:0043092	L-amino acid import	10	0	0.16	0.12539
GO:0090467	arginine import	10	0	0.16	0.12539
GO:1902023	L-arginine transport	10	0	0.16	0.12539
GO:0015809	arginine transport	10	0	0.16	0.12539
GO:0051640	organelle localization	61	2	0.98	0.12564
GO:0006928	cellular component movement	110	3	1.76	0.1266
GO:0007018	microtubule-based movement	110	3	1.76	0.1266
GO:0080090	regulation of primary metabolic process	2640	66	42.25	0.1269
GO:0046365	monosaccharide catabolic process	57	0	0.91	0.12702
GO:0019320	hexose catabolic process	57	0	0.91	0.12702
GO:0046173	polyol biosynthetic process	12	0	0.19	0.12725
GO:0006188	IMP biosynthetic process	31	0	0.5	0.12735
GO:0014070	response to organic cyclic compound	144	5	2.3	0.12754
GO:0006412	translation	1714	14	27.43	0.12842
GO:0019321	pentose metabolic process	45	2	0.72	0.12954
GO:0015985	energy coupled proton transport, down electrochemical gradient	187	0	2.99	0.12961
GO:0015986	ATP synthesis coupled proton transport	187	0	2.99	0.12961
GO:0006122	mitochondrial electron transport, ubiquinol to cytochrome c	30	0	0.48	0.13106
GO:0031086	nuclear-transcribed mRNA catabolic process, deadenylation-independent decay	9	0	0.14	0.1312
GO:0031087	deadenylation-independent decapping of nuclear-transcribed mRNA	9	0	0.14	0.1312
GO:0009081	branched-chain amino acid metabolic process	62	0	0.99	0.13121
GO:0030837	negative regulation of actin filament polymerization	13	1	0.21	0.13139
GO:0032272	negative regulation of protein polymerization	13	1	0.21	0.13139
GO:0031333	negative regulation of protein complex assembly	13	1	0.21	0.13139
GO:0051494	negative regulation of cytoskeleton organization	13	1	0.21	0.13139
GO:0042455	ribonucleoside biosynthetic process	371	1	5.94	0.13141
GO:0000028	ribosomal small subunit assembly	70	3	1.12	0.13206
GO:0070534	protein K63-linked ubiquitination	10	0	0.16	0.13316
GO:0018130	heterocycle biosynthetic process	3421	64	54.75	0.13459
GO:0033554	cellular response to stress	785	23	12.56	0.13485
GO:1901661	quinone metabolic process	28	0	0.45	0.13591
GO:1901663	quinone biosynthetic process	28	0	0.45	0.13591
GO:0042181	ketone biosynthetic process	28	0	0.45	0.13591
GO:0042908	xenobiotic transport	9	2	0.14	0.1363
GO:0050777	negative regulation of immune response	11	0	0.18	0.1369
GO:0045824	negative regulation of innate immune response	11	0	0.18	0.1369
GO:0034032	purine nucleoside bisphosphate metabolic process	54	0	0.86	0.13739
GO:0033865	nucleoside bisphosphate metabolic process	54	0	0.86	0.13739
GO:0033875	ribonucleoside bisphosphate metabolic process	54	0	0.86	0.13739
GO:0071840	cellular component organization or biogenesis	3580	79	57.29	0.13774
GO:0009690	cytokinin metabolic process	44	0	0.7	0.13849
GO:0015695	organic cation transport	18	0	0.29	0.13852
GO:0051513	regulation of monopolar cell growth	7	1	0.11	0.13869
GO:2001293	malonyl-CoA metabolic process	27	0	0.43	0.13922
GO:0009064	glutamine family amino acid metabolic process	128	4	2.05	0.13948
GO:0080022	primary root development	8	2	0.13	0.14019
GO:0016246	RNA interference	34	2	0.54	0.14088
GO:0030422	production of siRNA involved in RNA interference	34	2	0.54	0.14088
GO:0046474	glycerophospholipid biosynthetic process	79	0	1.26	0.14156
GO:0006471	protein ADP-ribosylation	12	2	0.19	0.14235
GO:0009769	photosynthesis, light harvesting in photosystem II	16	0	0.26	0.14289
GO:0016032	viral process	28	0	0.45	0.14297
GO:0019720	Mo-molybdopterin cofactor metabolic process	12	0	0.19	0.1446
GO:0006777	Mo-molybdopterin cofactor biosynthetic process	12	0	0.19	0.1446
GO:1902586	multi-organism intercellular transport	8	0	0.13	0.14559
GO:0046740	transport of virus in host, cell to cell	8	0	0.13	0.14559
GO:0009108	coenzyme biosynthetic process	197	0	3.15	0.14654
GO:0006526	arginine biosynthetic process	23	0	0.37	0.14684
GO:0009088	threonine biosynthetic process	8	0	0.13	0.14791
GO:0000302	response to reactive oxygen species	240	9	3.84	0.14821
GO:0042435	indole-containing compound biosynthetic process	37	0	0.59	0.14852
GO:0017006	protein-tetrapyrrole linkage	16	0	0.26	0.14868
GO:0009259	ribonucleotide metabolic process	731	3	11.7	0.14872
GO:0019693	ribose phosphate metabolic process	731	3	11.7	0.14872
GO:0072583	clathrin-mediated endocytosis	13	0	0.21	0.14914
GO:0031221	arabinan metabolic process	16	0	0.26	0.14964
GO:0031222	arabinan catabolic process	16	0	0.26	0.14964
GO:0009211	pyrimidine deoxyribonucleoside triphosphate metabolic process	7	2	0.11	0.15014
GO:0000280	nuclear division	155	5	2.48	0.15041
GO:0015672	monovalent inorganic cation transport	718	1	11.49	0.15055
GO:0000023	maltose metabolic process	9	0	0.14	0.15075
GO:0002253	activation of immune response	22	0	0.35	0.151
GO:0002218	activation of innate immune response	22	0	0.35	0.151
GO:0009161	ribonucleoside monophosphate metabolic process	535	0	8.56	0.15121
GO:0016043	cellular component organization	3095	71	49.53	0.15125
GO:0006072	glycerol-3-phosphate metabolic process	12	0	0.19	0.15145
GO:0006753	nucleoside phosphate metabolic process	953	6	15.25	0.15245
GO:0071426	ribonucleoprotein complex export from nucleus	15	0	0.24	0.15398
GO:0071166	ribonucleoprotein complex localization	15	0	0.24	0.15398
GO:0009163	nucleoside biosynthetic process	374	1	5.99	0.15442
GO:0006820	anion transport	473	8	7.57	0.15462
GO:0045087	innate immune response	147	0	2.35	0.15524
GO:0008535	respiratory chain complex IV assembly	14	0	0.22	0.1557
GO:0009156	ribonucleoside monophosphate biosynthetic process	304	0	4.86	0.156
GO:0034614	cellular response to reactive oxygen species	214	9	3.42	0.15631
GO:0034654	nucleobase-containing compound biosynthetic process	3120	63	49.93	0.15675
GO:0010089	xylem development	18	3	0.29	0.15708
GO:0034030	ribonucleoside bisphosphate biosynthetic process	34	0	0.54	0.15722
GO:0034033	purine nucleoside bisphosphate biosynthetic process	34	0	0.54	0.15722
GO:0033866	nucleoside bisphosphate biosynthetic process	34	0	0.54	0.15722
GO:0015937	coenzyme A biosynthetic process	34	0	0.54	0.15722
GO:0042548	regulation of photosynthesis, light reaction	20	0	0.32	0.15783
GO:0043467	regulation of generation of precursor metabolites and energy	20	0	0.32	0.15783
GO:0006014	D-ribose metabolic process	17	2	0.27	0.15791
GO:0001522	pseudouridine synthesis	35	5	0.56	0.15932
GO:0000162	tryptophan biosynthetic process	30	0	0.48	0.15944
GO:0046219	indolalkylamine biosynthetic process	30	0	0.48	0.15944
GO:0007076	mitotic chromosome condensation	13	1	0.21	0.16026
GO:0010346	shoot axis formation	18	0	0.29	0.16082
GO:0010223	secondary shoot formation	18	0	0.29	0.16082
GO:0001763	morphogenesis of a branching structure	18	0	0.29	0.16082
GO:0010101	post-embryonic root morphogenesis	28	0	0.45	0.16212
GO:0010102	lateral root morphogenesis	28	0	0.45	0.16212
GO:0032392	DNA geometric change	63	5	1.01	0.16214
GO:0032508	DNA duplex unwinding	63	5	1.01	0.16214
GO:0006525	arginine metabolic process	33	1	0.53	0.16215
GO:0010374	stomatal complex development	33	1	0.53	0.16218
GO:0090558	plant epidermis development	33	1	0.53	0.16218
GO:0032412	regulation of ion transmembrane transporter activity	6	0	0.1	0.16255
GO:0032409	regulation of transporter activity	6	0	0.1	0.16255
GO:0022898	regulation of transmembrane transporter activity	6	0	0.1	0.16255
GO:0034427	nuclear-transcribed mRNA catabolic process, exonucleolytic, 3'-5'	14	0	0.22	0.16302
GO:0051225	spindle assembly	30	1	0.48	0.16322
GO:0044724	single-organism carbohydrate catabolic process	217	4	3.47	0.16325
GO:0098660	inorganic ion transmembrane transport	747	2	11.95	0.16345
GO:0035674	tricarboxylic acid transmembrane transport	9	0	0.14	0.16354
GO:0010588	cotyledon vascular tissue pattern formation	8	0	0.13	0.16393
GO:0070925	organelle assembly	236	4	3.78	0.16509
GO:0051567	histone H3-K9 methylation	9	1	0.14	0.16529
GO:0051321	meiotic cell cycle	104	1	1.66	0.16546
GO:0006431	methionyl-tRNA aminoacylation	10	0	0.16	0.1656
GO:0000003	reproduction	214	2	3.42	0.16565
GO:0033617	mitochondrial respiratory chain complex IV assembly	12	0	0.19	0.16627
GO:0046496	nicotinamide nucleotide metabolic process	75	0	1.2	0.16671
GO:0006270	DNA replication initiation	34	5	0.54	0.16704
GO:0009617	response to bacterium	109	0	1.74	0.16721
GO:0006112	energy reserve metabolic process	36	0	0.58	0.16723
GO:0005977	glycogen metabolic process	36	0	0.58	0.16723
GO:0034063	stress granule assembly	7	0	0.11	0.16799
GO:0006379	mRNA cleavage	15	0	0.24	0.168
GO:0007127	meiosis I	50	0	0.8	0.16833
GO:0042743	hydrogen peroxide metabolic process	181	8	2.9	0.16913
GO:0006464	cellular protein modification process	3653	48	58.46	0.1698
GO:0036211	protein modification process	3653	48	58.46	0.1698
GO:0042822	pyridoxal phosphate metabolic process	13	0	0.21	0.16988
GO:0042823	pyridoxal phosphate biosynthetic process	13	0	0.21	0.16988
GO:0043436	oxoacid metabolic process	1837	23	29.4	0.17005
GO:0051649	establishment of localization in cell	1057	9	16.91	0.17101
GO:0071918	urea transmembrane transport	7	0	0.11	0.17101
GO:0015840	urea transport	7	0	0.11	0.17101
GO:0022613	ribonucleoprotein complex biogenesis	755	9	12.08	0.17105
GO:0009060	aerobic respiration	139	0	2.22	0.17165
GO:1902475	L-alpha-amino acid transmembrane transport	19	0	0.3	0.17186
GO:0044273	sulfur compound catabolic process	21	0	0.34	0.17201
GO:0006073	cellular glucan metabolic process	288	17	4.61	0.17201
GO:0051054	positive regulation of DNA metabolic process	7	0	0.11	0.17252
GO:0019509	L-methionine biosynthetic process from methylthioadenosine	17	0	0.27	0.17301
GO:0071267	L-methionine salvage	17	0	0.27	0.17301
GO:0043102	amino acid salvage	17	0	0.27	0.17301
GO:0019219	regulation of nucleobase-containing compound metabolic process	2229	55	35.67	0.17323
GO:0022406	membrane docking	96	2	1.54	0.17347
GO:0006266	DNA ligation	13	2	0.21	0.17394
GO:0009200	deoxyribonucleoside triphosphate metabolic process	12	2	0.19	0.17445
GO:0045292	mRNA cis splicing, via spliceosome	18	0	0.29	0.17465
GO:1901576	organic substance biosynthetic process	7207	116	115.33	0.17536
GO:0016192	vesicle-mediated transport	669	3	10.71	0.17628
GO:0007052	mitotic spindle organization	36	2	0.58	0.17639
GO:0006082	organic acid metabolic process	1843	23	29.49	0.17682
GO:0042454	ribonucleoside catabolic process	135	2	2.16	0.17695
GO:1901292	nucleoside phosphate catabolic process	141	2	2.26	0.17803
GO:0016114	terpenoid biosynthetic process	138	1	2.21	0.17906
GO:0033238	regulation of cellular amine metabolic process	18	0	0.29	0.17952
GO:0006521	regulation of cellular amino acid metabolic process	18	0	0.29	0.17952
GO:0001676	long-chain fatty acid metabolic process	13	0	0.21	0.17999
GO:0009071	serine family amino acid catabolic process	17	2	0.27	0.18041
GO:0044763	single-organism cellular process	10105	163	161.71	0.1808
GO:0080154	regulation of fertilization	6	0	0.1	0.1809
GO:0080155	regulation of double fertilization forming a zygote and endosperm	6	0	0.1	0.1809
GO:0006325	chromatin organization	331	18	5.3	0.18099
GO:0046323	glucose import	50	0	0.8	0.1816
GO:0015758	glucose transport	50	0	0.8	0.1816
GO:0015689	molybdate ion transport	11	1	0.18	0.18162
GO:0044271	cellular nitrogen compound biosynthetic process	3420	68	54.73	0.18195
GO:0071489	cellular response to red or far red light	24	0	0.38	0.18321
GO:0010017	red or far-red light signaling pathway	24	0	0.38	0.18321
GO:0044262	cellular carbohydrate metabolic process	525	23	8.4	0.18409
GO:0009826	unidimensional cell growth	102	3	1.63	0.18439
GO:0042549	photosystem II stabilization	7	0	0.11	0.18461
GO:0000054	ribosomal subunit export from nucleus	13	0	0.21	0.18477
GO:0033750	ribosome localization	13	0	0.21	0.18477
GO:0033753	establishment of ribosome localization	13	0	0.21	0.18477
GO:0071428	rRNA-containing ribonucleoprotein complex export from nucleus	13	0	0.21	0.18477
GO:0034599	cellular response to oxidative stress	274	10	4.38	0.18496
GO:0060255	regulation of macromolecule metabolic process	2607	66	41.72	0.18529
GO:1901659	glycosyl compound biosynthetic process	379	1	6.07	0.18629
GO:0007020	microtubule nucleation	21	1	0.34	0.18812
GO:0031109	microtubule polymerization or depolymerization	21	1	0.34	0.18812
GO:0046785	microtubule polymerization	21	1	0.34	0.18812
GO:0009099	valine biosynthetic process	11	0	0.18	0.18858
GO:0051123	RNA polymerase II transcriptional preinitiation complex assembly	42	0	0.67	0.18924
GO:0065004	protein-DNA complex assembly	169	14	2.7	0.19068
GO:0006661	phosphatidylinositol biosynthetic process	47	0	0.75	0.19079
GO:0006605	protein targeting	321	2	5.14	0.19189
GO:0007166	cell surface receptor signaling pathway	128	0	2.05	0.19197
GO:0006355	regulation of transcription, DNA-templated	2017	50	32.28	0.19208
GO:2001141	regulation of RNA biosynthetic process	2017	50	32.28	0.19208
GO:0009889	regulation of biosynthetic process	2234	53	35.75	0.19274
GO:0009154	purine ribonucleotide catabolic process	128	2	2.05	0.19274
GO:0009118	regulation of nucleoside metabolic process	128	2	2.05	0.19274
GO:0009261	ribonucleotide catabolic process	128	2	2.05	0.19274
GO:1900542	regulation of purine nucleotide metabolic process	128	2	2.05	0.19274
GO:0072488	ammonium transmembrane transport	19	0	0.3	0.19318
GO:0019362	pyridine nucleotide metabolic process	76	0	1.22	0.19418
GO:0009058	biosynthetic process	7617	121	121.89	0.19547
GO:0006796	phosphate-containing compound metabolic process	4138	50	66.22	0.19555
GO:0000278	mitotic cell cycle	187	8	2.99	0.19564
GO:0045727	positive regulation of translation	48	0	0.77	0.19571
GO:0006271	DNA strand elongation involved in DNA replication	26	6	0.42	0.19605
GO:0022616	DNA strand elongation	26	6	0.42	0.19605
GO:0045493	xylan catabolic process	19	0	0.3	0.19627
GO:0051186	cofactor metabolic process	446	0	7.14	0.19654
GO:0006721	terpenoid metabolic process	170	2	2.72	0.19668
GO:0031647	regulation of protein stability	13	0	0.21	0.19684
GO:0050821	protein stabilization	13	0	0.21	0.19684
GO:0072337	modified amino acid transport	6	0	0.1	0.19704
GO:0006513	protein monoubiquitination	11	0	0.18	0.19744
GO:0006624	vacuolar protein processing	15	0	0.24	0.1976
GO:0046394	carboxylic acid biosynthetic process	775	6	12.4	0.19794
GO:0016053	organic acid biosynthetic process	775	6	12.4	0.19794
GO:0051938	L-glutamate import	9	0	0.14	0.19796
GO:0015813	L-glutamate transport	9	0	0.14	0.19796
GO:0015800	acidic amino acid transport	9	0	0.14	0.19796
GO:0009143	nucleoside triphosphate catabolic process	135	2	2.16	0.19814
GO:0071824	protein-DNA complex subunit organization	172	14	2.75	0.19837
GO:0019438	aromatic compound biosynthetic process	3517	65	56.28	0.19845
GO:0006120	mitochondrial electron transport, NADH to ubiquinone	20	0	0.32	0.19965
GO:0015711	organic anion transport	283	5	4.53	0.20082
GO:0051172	negative regulation of nitrogen compound metabolic process	149	4	2.38	0.20145
GO:0040029	regulation of gene expression, epigenetic	139	5	2.22	0.20149
GO:0034754	cellular hormone metabolic process	47	0	0.75	0.20157
GO:1902850	microtubule cytoskeleton organization involved in mitosis	18	0	0.29	0.20209
GO:0000413	protein peptidyl-prolyl isomerization	103	1	1.65	0.20256
GO:0051345	positive regulation of hydrolase activity	123	2	1.97	0.20364
GO:0006955	immune response	151	0	2.42	0.20395
GO:0030811	regulation of nucleotide catabolic process	127	2	2.03	0.20421
GO:0009203	ribonucleoside triphosphate catabolic process	127	2	2.03	0.20421
GO:0009207	purine ribonucleoside triphosphate catabolic process	127	2	2.03	0.20421
GO:0033121	regulation of purine nucleotide catabolic process	127	2	2.03	0.20421
GO:0030261	chromosome condensation	14	1	0.22	0.20502
GO:0006996	organelle organization	1710	37	27.36	0.20505
GO:0048364	root development	177	7	2.83	0.20516
GO:0022622	root system development	177	7	2.83	0.20516
GO:2001295	malonyl-CoA biosynthetic process	26	0	0.42	0.20552
GO:0031407	oxylipin metabolic process	35	0	0.56	0.20639
GO:0031408	oxylipin biosynthetic process	35	0	0.56	0.20639
GO:0051656	establishment of organelle localization	57	2	0.91	0.20639
GO:0035967	cellular response to topologically incorrect protein	12	0	0.19	0.20709
GO:1902582	single-organism intracellular transport	615	3	9.84	0.20712
GO:0010206	photosystem II repair	21	0	0.34	0.208
GO:0033037	polysaccharide localization	13	2	0.21	0.20857
GO:0052545	callose localization	13	2	0.21	0.20857
GO:0051262	protein tetramerization	8	0	0.13	0.20876
GO:0031326	regulation of cellular biosynthetic process	2230	53	35.69	0.20882
GO:0032324	molybdopterin cofactor biosynthetic process	13	0	0.21	0.20896
GO:0043545	molybdopterin cofactor metabolic process	13	0	0.21	0.20896
GO:0051189	prosthetic group metabolic process	13	0	0.21	0.20896
GO:0010267	production of ta-siRNAs involved in RNA interference	12	0	0.19	0.20949
GO:0034497	protein localization to pre-autophagosomal structure	9	0	0.14	0.2095
GO:0048589	developmental growth	149	3	2.38	0.2099
GO:0046130	purine ribonucleoside catabolic process	132	2	2.11	0.21007
GO:0010162	seed dormancy process	22	0	0.35	0.21044
GO:0022611	dormancy process	22	0	0.35	0.21044
GO:0042450	arginine biosynthetic process via ornithine	7	0	0.11	0.21068
GO:0010051	xylem and phloem pattern formation	35	3	0.56	0.21119
GO:0006426	glycyl-tRNA aminoacylation	6	0	0.1	0.21162
GO:1903047	mitotic cell cycle process	169	8	2.7	0.21166
GO:0090150	establishment of protein localization to membrane	85	0	1.36	0.21216
GO:0072657	protein localization to membrane	85	0	1.36	0.21216
GO:0051052	regulation of DNA metabolic process	58	3	0.93	0.21242
GO:0006817	phosphate ion transport	28	0	0.45	0.21247
GO:0044710	single-organism metabolic process	7870	111	125.94	0.21415
GO:0000103	sulfate assimilation	67	1	1.07	0.21418
GO:0009956	radial pattern formation	13	0	0.21	0.21444
GO:0009755	hormone-mediated signaling pathway	534	18	8.55	0.2148
GO:1902222	erythrose 4-phosphate/phosphoenolpyruvate family amino acid catabolic process	22	0	0.35	0.21489
GO:0006559	L-phenylalanine catabolic process	22	0	0.35	0.21489
GO:0006195	purine nucleotide catabolic process	131	2	2.1	0.21562
GO:0046434	organophosphate catabolic process	177	2	2.83	0.21577
GO:0000387	spliceosomal snRNP assembly	39	1	0.62	0.21597
GO:0007017	microtubule-based process	302	10	4.83	0.21604
GO:0009145	purine nucleoside triphosphate biosynthetic process	241	1	3.86	0.21752
GO:0009206	purine ribonucleoside triphosphate biosynthetic process	241	1	3.86	0.21752
GO:2000034	regulation of seed maturation	14	0	0.22	0.21801
GO:0000098	sulfur amino acid catabolic process	6	0	0.1	0.219
GO:0071265	L-methionine biosynthetic process	20	0	0.32	0.21916
GO:0006970	response to osmotic stress	187	0	2.99	0.21933
GO:0006754	ATP biosynthetic process	228	0	3.65	0.21948
GO:0071495	cellular response to endogenous stimulus	536	18	8.58	0.21986
GO:0032870	cellular response to hormone stimulus	536	18	8.58	0.21986
GO:0016052	carbohydrate catabolic process	498	16	7.97	0.22033
GO:0050790	regulation of catalytic activity	649	18	10.39	0.22079
GO:0012501	programmed cell death	92	0	1.47	0.22095
GO:0009739	response to gibberellin	50	1	0.8	0.22149
GO:0000042	protein targeting to Golgi	7	0	0.11	0.22175
GO:0072600	establishment of protein localization to Golgi	7	0	0.11	0.22175
GO:0033044	regulation of chromosome organization	43	0	0.69	0.22246
GO:0006560	proline metabolic process	21	1	0.34	0.22291
GO:0043244	regulation of protein complex disassembly	14	0	0.22	0.22293
GO:0035999	tetrahydrofolate interconversion	27	0	0.43	0.22453
GO:0044106	cellular amine metabolic process	138	4	2.21	0.22503
GO:0007126	meiotic nuclear division	82	1	1.31	0.22556
GO:0034629	cellular protein complex localization	20	0	0.32	0.22584
GO:0031503	protein complex localization	20	0	0.32	0.22584
GO:0010114	response to red light	7	0	0.11	0.22783
GO:0019538	protein metabolic process	6886	89	110.2	0.22854
GO:0009664	plant-type cell wall organization	213	13	3.41	0.22876
GO:0009247	glycolipid biosynthetic process	57	0	0.91	0.22879
GO:0071310	cellular response to organic substance	606	20	9.7	0.22909
GO:0046039	GTP metabolic process	134	3	2.14	0.22917
GO:1901069	guanosine-containing compound catabolic process	121	2	1.94	0.22919
GO:0043087	regulation of GTPase activity	121	2	1.94	0.22919
GO:0006184	GTP catabolic process	121	2	1.94	0.22919
GO:0033124	regulation of GTP catabolic process	121	2	1.94	0.22919
GO:0030865	cortical cytoskeleton organization	8	0	0.13	0.22957
GO:0006468	protein phosphorylation	1823	33	29.17	0.23003
GO:0010310	regulation of hydrogen peroxide metabolic process	6	0	0.1	0.23061
GO:0048278	vesicle docking	89	2	1.42	0.23124
GO:0009117	nucleotide metabolic process	940	5	15.04	0.23236
GO:0072594	establishment of protein localization to organelle	309	2	4.94	0.2332
GO:0009625	response to insect	7	0	0.11	0.23327
GO:0002213	defense response to insect	7	0	0.11	0.23327
GO:2000756	regulation of peptidyl-lysine acetylation	23	0	0.37	0.23348
GO:1901983	regulation of protein acetylation	23	0	0.37	0.23348
GO:0035065	regulation of histone acetylation	23	0	0.37	0.23348
GO:0051258	protein polymerization	54	2	0.86	0.23432
GO:0015992	proton transport	545	0	8.72	0.23437
GO:0006818	hydrogen transport	545	0	8.72	0.23437
GO:0009146	purine nucleoside triphosphate catabolic process	130	2	2.08	0.23478
GO:0006140	regulation of nucleotide metabolic process	130	2	2.08	0.23478
GO:0000018	regulation of DNA recombination	8	0	0.13	0.23505
GO:0008361	regulation of cell size	8	2	0.13	0.23531
GO:0043289	apocarotenoid biosynthetic process	9	0	0.14	0.2365
GO:0052646	alditol phosphate metabolic process	15	0	0.24	0.23671
GO:0045898	regulation of RNA polymerase II transcriptional preinitiation complex assembly	33	0	0.53	0.23681
GO:0045899	positive regulation of RNA polymerase II transcriptional preinitiation complex assembly	33	0	0.53	0.23681
GO:0080140	regulation of jasmonic acid metabolic process	6	0	0.1	0.23721
GO:0080141	regulation of jasmonic acid biosynthetic process	6	0	0.1	0.23721
GO:0046036	CTP metabolic process	29	1	0.46	0.23728
GO:0006241	CTP biosynthetic process	29	1	0.46	0.23728
GO:0006302	double-strand break repair	89	1	1.42	0.23751
GO:0045454	cell redox homeostasis	219	3	3.5	0.23827
GO:0044247	cellular polysaccharide catabolic process	88	6	1.41	0.23887
GO:0065009	regulation of molecular function	661	18	10.58	0.23955
GO:0019740	nitrogen utilization	17	0	0.27	0.23991
GO:0009836	fruit ripening, climacteric	6	0	0.1	0.23994
GO:0071407	cellular response to organic cyclic compound	119	3	1.9	0.24034
GO:0044249	cellular biosynthetic process	6860	105	109.78	0.24042
GO:0010193	response to ozone	6	0	0.1	0.24048
GO:0016572	histone phosphorylation	9	2	0.14	0.2405
GO:0043085	positive regulation of catalytic activity	204	5	3.26	0.24061
GO:0044093	positive regulation of molecular function	204	5	3.26	0.24061
GO:0044764	multi-organism cellular process	40	0	0.64	0.24116
GO:0072593	reactive oxygen species metabolic process	241	9	3.86	0.24126
GO:0090307	spindle assembly involved in mitosis	16	0	0.26	0.24141
GO:0051415	interphase microtubule nucleation by interphase microtubule organizing center	16	0	0.26	0.24141
GO:0051418	microtubule nucleation by microtubule organizing center	16	0	0.26	0.24141
GO:0051298	centrosome duplication	16	0	0.26	0.24141
GO:0048729	tissue morphogenesis	6	0	0.1	0.24155
GO:0002009	morphogenesis of an epithelium	6	0	0.1	0.24155
GO:0001736	establishment of planar polarity	6	0	0.1	0.24155
GO:0001738	morphogenesis of a polarized epithelium	6	0	0.1	0.24155
GO:0007164	establishment of tissue polarity	6	0	0.1	0.24155
GO:0031627	telomeric loop formation	18	0	0.29	0.24213
GO:0007131	reciprocal meiotic recombination	41	0	0.66	0.24215
GO:0035825	reciprocal DNA recombination	41	0	0.66	0.24215
GO:0070301	cellular response to hydrogen peroxide	172	8	2.75	0.24281
GO:0051641	cellular localization	1171	11	18.74	0.24304
GO:0044264	cellular polysaccharide metabolic process	359	18	5.74	0.24328
GO:0070646	protein modification by small protein removal	101	0	1.62	0.24347
GO:0048569	post-embryonic organ development	136	2	2.18	0.24353
GO:0016075	rRNA catabolic process	21	1	0.34	0.24462
GO:0050794	regulation of cellular process	4462	87	71.4	0.24486
GO:0098662	inorganic cation transmembrane transport	712	1	11.39	0.24501
GO:0006119	oxidative phosphorylation	204	0	3.26	0.24574
GO:0030154	cell differentiation	253	3	4.05	0.24589
GO:0090407	organophosphate biosynthetic process	627	4	10.03	0.246
GO:0000422	mitochondrion degradation	14	0	0.22	0.24603
GO:0010027	thylakoid membrane organization	37	0	0.59	0.24657
GO:0009668	plastid membrane organization	37	0	0.59	0.24657
GO:0009260	ribonucleotide biosynthetic process	358	1	5.73	0.24695
GO:0046390	ribose phosphate biosynthetic process	358	1	5.73	0.24695
GO:0045934	negative regulation of nucleobase-containing compound metabolic process	143	4	2.29	0.24743
GO:0045132	meiotic chromosome segregation	24	1	0.38	0.24778
GO:0010468	regulation of gene expression	2376	54	38.02	0.24798
GO:0009265	2'-deoxyribonucleotide biosynthetic process	9	2	0.14	0.24799
GO:0009221	pyrimidine deoxyribonucleotide biosynthetic process	9	2	0.14	0.24799
GO:0009219	pyrimidine deoxyribonucleotide metabolic process	9	2	0.14	0.24799
GO:0046385	deoxyribose phosphate biosynthetic process	9	2	0.14	0.24799
GO:0042372	phylloquinone biosynthetic process	6	0	0.1	0.24912
GO:0042374	phylloquinone metabolic process	6	0	0.1	0.24912
GO:0034655	nucleobase-containing compound catabolic process	299	5	4.78	0.25013
GO:0009798	axis specification	24	2	0.38	0.25045
GO:0042180	cellular ketone metabolic process	77	0	1.23	0.25156
GO:0016579	protein deubiquitination	81	0	1.3	0.25162
GO:0030029	actin filament-based process	77	3	1.23	0.25168
GO:0030036	actin cytoskeleton organization	77	3	1.23	0.25168
GO:2000112	regulation of cellular macromolecule biosynthetic process	2197	53	35.16	0.25275
GO:0010556	regulation of macromolecule biosynthetic process	2197	53	35.16	0.25275
GO:0008652	cellular amino acid biosynthetic process	420	4	6.72	0.253
GO:2000022	regulation of jasmonic acid mediated signaling pathway	17	0	0.27	0.25319
GO:0006268	DNA unwinding involved in DNA replication	11	0	0.18	0.2532
GO:0052386	cell wall thickening	12	2	0.19	0.25353
GO:0052543	callose deposition in cell wall	12	2	0.19	0.25353
GO:0048285	organelle fission	200	5	3.2	0.25439
GO:0051276	chromosome organization	456	19	7.3	0.25746
GO:0006491	N-glycan processing	16	0	0.26	0.25796
GO:0034475	U4 snRNA 3'-end processing	11	0	0.18	0.2584
GO:0043623	cellular protein complex assembly	392	3	6.27	0.2585
GO:0032506	cytokinetic process	53	2	0.85	0.25884
GO:0043067	regulation of programmed cell death	38	0	0.61	0.25926
GO:0042218	1-aminocyclopropane-1-carboxylate biosynthetic process	29	1	0.46	0.25956
GO:0018871	1-aminocyclopropane-1-carboxylate metabolic process	29	1	0.46	0.25956
GO:0042744	hydrogen peroxide catabolic process	170	8	2.72	0.25959
GO:0000917	barrier septum assembly	9	0	0.14	0.2596
GO:0090529	cell septum assembly	9	0	0.14	0.2596
GO:0042430	indole-containing compound metabolic process	60	0	0.96	0.26079
GO:0071483	cellular response to blue light	9	0	0.14	0.26082
GO:0030522	intracellular receptor signaling pathway	9	0	0.14	0.26082
GO:0009785	blue light signaling pathway	9	0	0.14	0.26082
GO:0002682	regulation of immune system process	51	0	0.82	0.26173
GO:0033385	geranylgeranyl diphosphate metabolic process	9	0	0.14	0.26197
GO:0009176	pyrimidine deoxyribonucleoside monophosphate metabolic process	6	2	0.1	0.26247
GO:0009177	pyrimidine deoxyribonucleoside monophosphate biosynthetic process	6	2	0.1	0.26247
GO:0070897	DNA-templated transcriptional preinitiation complex assembly	43	0	0.69	0.2625
GO:0070988	demethylation	11	0	0.18	0.26286
GO:0032147	activation of protein kinase activity	37	3	0.59	0.26287
GO:0043547	positive regulation of GTPase activity	116	2	1.86	0.26367
GO:0044765	single-organism transport	3351	44	53.63	0.26386
GO:0042542	response to hydrogen peroxide	176	8	2.82	0.26412
GO:0010075	regulation of meristem growth	21	0	0.34	0.26416
GO:0010876	lipid localization	134	6	2.14	0.26526
GO:0034976	response to endoplasmic reticulum stress	30	0	0.48	0.26531
GO:0016265	death	116	0	1.86	0.26555
GO:0008219	cell death	116	0	1.86	0.26555
GO:0046283	anthocyanin-containing compound metabolic process	20	2	0.32	0.26558
GO:0006006	glucose metabolic process	93	1	1.49	0.26653
GO:0048193	Golgi vesicle transport	190	0	3.04	0.2667
GO:0043631	RNA polyadenylation	20	0	0.32	0.26719
GO:0009816	defense response to bacterium, incompatible interaction	14	0	0.22	0.26733
GO:0034227	tRNA thio-modification	10	0	0.16	0.26744
GO:0045017	glycerolipid biosynthetic process	111	1	1.78	0.26798
GO:0045860	positive regulation of protein kinase activity	48	3	0.77	0.26806
GO:0033674	positive regulation of kinase activity	48	3	0.77	0.26806
GO:0010252	auxin homeostasis	20	0	0.32	0.26814
GO:2000278	regulation of DNA biosynthetic process	8	0	0.13	0.26817
GO:0032204	regulation of telomere maintenance	8	0	0.13	0.26817
GO:0051972	regulation of telomerase activity	8	0	0.13	0.26817
GO:0051974	negative regulation of telomerase activity	8	0	0.13	0.26817
GO:0051241	negative regulation of multicellular organismal process	54	0	0.86	0.26857
GO:0006793	phosphorus metabolic process	4177	50	66.84	0.26911
GO:0044087	regulation of cellular component biogenesis	112	3	1.79	0.26946
GO:0097034	mitochondrial respiratory chain complex IV biogenesis	14	0	0.22	0.26983
GO:0043090	amino acid import	16	0	0.26	0.26991
GO:0018196	peptidyl-asparagine modification	17	0	0.27	0.27119
GO:0018279	protein N-linked glycosylation via asparagine	17	0	0.27	0.27119
GO:0015749	monosaccharide transport	54	0	0.86	0.27158
GO:0009166	nucleotide catabolic process	138	2	2.21	0.27168
GO:0009606	tropism	40	2	0.64	0.27197
GO:0002239	response to oomycetes	13	0	0.21	0.27249
GO:0019755	one-carbon compound transport	12	0	0.19	0.27338
GO:0000394	RNA splicing, via endonucleolytic cleavage and ligation	18	0	0.29	0.27407
GO:0009303	rRNA transcription	6	0	0.1	0.2755
GO:0050832	defense response to fungus	114	6	1.82	0.2758
GO:0015696	ammonium transport	21	0	0.34	0.27658
GO:2000762	regulation of phenylpropanoid metabolic process	6	0	0.1	0.27725
GO:0010412	mannan metabolic process	25	0	0.4	0.27857
GO:0046355	mannan catabolic process	25	0	0.4	0.27857
GO:0048868	pollen tube development	42	1	0.67	0.27938
GO:0006342	chromatin silencing	69	3	1.1	0.27944
GO:0045814	negative regulation of gene expression, epigenetic	69	3	1.1	0.27944
GO:0009263	deoxyribonucleotide biosynthetic process	15	2	0.24	0.27952
GO:1902047	polyamine transmembrane transport	7	0	0.11	0.27996
GO:0006904	vesicle docking involved in exocytosis	38	0	0.61	0.28064
GO:0019058	viral life cycle	13	0	0.21	0.28154
GO:0019079	viral genome replication	13	0	0.21	0.28154
GO:0046786	viral replication complex formation and maintenance	13	0	0.21	0.28154
GO:0018208	peptidyl-proline modification	106	1	1.7	0.28167
GO:1901658	glycosyl compound catabolic process	148	2	2.37	0.2819
GO:1902580	single-organism cellular localization	127	0	2.03	0.28195
GO:1902578	single-organism localization	127	0	2.03	0.28195
GO:1902358	sulfate transmembrane transport	29	1	0.46	0.28231
GO:0006568	tryptophan metabolic process	41	0	0.66	0.2826
GO:0006586	indolalkylamine metabolic process	41	0	0.66	0.2826
GO:0060560	developmental growth involved in morphogenesis	113	3	1.81	0.28325
GO:0042742	defense response to bacterium	101	0	1.62	0.28367
GO:0009959	negative gravitropism	9	0	0.14	0.28398
GO:0019252	starch biosynthetic process	32	2	0.51	0.28423
GO:0055086	nucleobase-containing small molecule metabolic process	1094	6	17.51	0.28469
GO:0006212	uracil catabolic process	6	0	0.1	0.28576
GO:0006208	pyrimidine nucleobase catabolic process	6	0	0.1	0.28576
GO:0061640	cytoskeleton-dependent cytokinesis	155	4	2.48	0.28579
GO:0022411	cellular component disassembly	74	2	1.18	0.28614
GO:1901362	organic cyclic compound biosynthetic process	3680	69	58.89	0.28674
GO:0051156	glucose 6-phosphate metabolic process	11	0	0.18	0.28712
GO:0006750	glutathione biosynthetic process	6	0	0.1	0.28721
GO:0019184	nonribosomal peptide biosynthetic process	6	0	0.1	0.28721
GO:0048646	anatomical structure formation involved in morphogenesis	122	3	1.95	0.28914
GO:0000819	sister chromatid segregation	37	1	0.59	0.28922
GO:0031323	regulation of cellular metabolic process	2711	61	43.38	0.28951
GO:0044205	'de novo' UMP biosynthetic process	7	0	0.11	0.29004
GO:0000478	endonucleolytic cleavage involved in rRNA processing	19	0	0.3	0.29056
GO:0000479	endonucleolytic cleavage of tricistronic rRNA transcript (SSU-rRNA, 5.8S rRNA, LSU-rRNA)	19	0	0.3	0.29056
GO:0043171	peptide catabolic process	14	0	0.22	0.2908
GO:0030641	regulation of cellular pH	48	0	0.77	0.29092
GO:0051453	regulation of intracellular pH	48	0	0.77	0.29092
GO:0010304	PSII associated light-harvesting complex II catabolic process	16	0	0.26	0.29104
GO:0051493	regulation of cytoskeleton organization	47	1	0.75	0.29223
GO:0006353	DNA-templated transcription, termination	13	1	0.21	0.29239
GO:1901068	guanosine-containing compound metabolic process	161	3	2.58	0.29296
GO:0010286	heat acclimation	15	2	0.24	0.29421
GO:0006743	ubiquinone metabolic process	19	0	0.3	0.29455
GO:0006744	ubiquinone biosynthetic process	19	0	0.3	0.29455
GO:0009394	2'-deoxyribonucleotide metabolic process	12	2	0.19	0.29502
GO:0019692	deoxyribose phosphate metabolic process	12	2	0.19	0.29502
GO:0032984	macromolecular complex disassembly	73	2	1.17	0.2954
GO:0046184	aldehyde biosynthetic process	18	0	0.29	0.29568
GO:0008544	epidermis development	107	1	1.71	0.29605
GO:0043588	skin development	107	1	1.71	0.29605
GO:0060429	epithelium development	107	1	1.71	0.29605
GO:0006811	ion transport	1616	20	25.86	0.2961
GO:0006487	protein N-linked glycosylation	57	0	0.91	0.29781
GO:0044070	regulation of anion transport	7	0	0.11	0.29852
GO:0009142	nucleoside triphosphate biosynthetic process	264	1	4.22	0.29861
GO:0006767	water-soluble vitamin metabolic process	65	0	1.04	0.30069
GO:0042327	positive regulation of phosphorylation	52	3	0.83	0.3007
GO:0001934	positive regulation of protein phosphorylation	52	3	0.83	0.3007
GO:0010562	positive regulation of phosphorus metabolic process	52	3	0.83	0.3007
GO:0045937	positive regulation of phosphate metabolic process	52	3	0.83	0.3007
GO:0007215	glutamate receptor signaling pathway	32	0	0.51	0.30089
GO:0035235	ionotropic glutamate receptor signaling pathway	32	0	0.51	0.30089
GO:1900109	regulation of histone H3-K9 dimethylation	6	0	0.1	0.30122
GO:0051574	positive regulation of histone H3-K9 methylation	6	0	0.1	0.30122
GO:0031062	positive regulation of histone methylation	6	0	0.1	0.30122
GO:0018027	peptidyl-lysine dimethylation	6	0	0.1	0.30122
GO:0036123	histone H3-K9 dimethylation	6	0	0.1	0.30122
GO:1900111	positive regulation of histone H3-K9 dimethylation	6	0	0.1	0.30122
GO:0031327	negative regulation of cellular biosynthetic process	168	4	2.69	0.30164
GO:1902456	regulation of stomatal opening	10	0	0.16	0.30215
GO:1990069	stomatal opening	10	0	0.16	0.30215
GO:0015802	basic amino acid transport	13	0	0.21	0.30231
GO:0002376	immune system process	164	0	2.62	0.30375
GO:0009937	regulation of gibberellic acid mediated signaling pathway	16	0	0.26	0.30422
GO:0015706	nitrate transport	15	0	0.24	0.30583
GO:0042814	monopolar cell growth	10	1	0.16	0.30637
GO:0006829	zinc ion transport	50	0	0.8	0.30639
GO:0030166	proteoglycan biosynthetic process	8	0	0.13	0.30646
GO:0030201	heparan sulfate proteoglycan metabolic process	8	0	0.13	0.30646
GO:0015012	heparan sulfate proteoglycan biosynthetic process	8	0	0.13	0.30646
GO:0006152	purine nucleoside catabolic process	140	2	2.24	0.30669
GO:0009310	amine catabolic process	11	0	0.18	0.30815
GO:0042402	cellular biogenic amine catabolic process	11	0	0.18	0.30815
GO:0043207	response to external biotic stimulus	285	6	4.56	0.30849
GO:0051707	response to other organism	285	6	4.56	0.30849
GO:0006376	mRNA splice site selection	13	0	0.21	0.3087
GO:0042158	lipoprotein biosynthetic process	60	0	0.96	0.30931
GO:0006497	protein lipidation	60	0	0.96	0.30931
GO:0031057	negative regulation of histone modification	13	0	0.21	0.30931
GO:2000757	negative regulation of peptidyl-lysine acetylation	13	0	0.21	0.30931
GO:1901984	negative regulation of protein acetylation	13	0	0.21	0.30931
GO:0035067	negative regulation of histone acetylation	13	0	0.21	0.30931
GO:1903309	negative regulation of chromatin modification	13	0	0.21	0.30931
GO:0006813	potassium ion transport	134	1	2.14	0.30944
GO:0042391	regulation of membrane potential	64	1	1.02	0.30948
GO:0009201	ribonucleoside triphosphate biosynthetic process	257	1	4.11	0.30949
GO:0046621	negative regulation of organ growth	9	0	0.14	0.30961
GO:1901700	response to oxygen-containing compound	850	16	13.6	0.3099
GO:0009856	pollination	130	2	2.08	0.3113
GO:0044706	multi-multicellular organism process	130	2	2.08	0.3113
GO:0009696	salicylic acid metabolic process	7	0	0.11	0.31191
GO:0006898	receptor-mediated endocytosis	17	0	0.27	0.31284
GO:0006260	DNA replication	246	16	3.94	0.31343
GO:0000055	ribosomal large subunit export from nucleus	7	0	0.11	0.31363
GO:1901701	cellular response to oxygen-containing compound	558	11	8.93	0.31368
GO:0006869	lipid transport	104	6	1.66	0.31385
GO:0002683	negative regulation of immune system process	14	0	0.22	0.31458
GO:0006573	valine metabolic process	17	0	0.27	0.31471
GO:0043412	macromolecule modification	3928	55	62.86	0.3158
GO:0030163	protein catabolic process	923	15	14.77	0.31636
GO:0001906	cell killing	23	4	0.37	0.31637
GO:0031640	killing of cells of other organism	23	4	0.37	0.31637
GO:0044364	disruption of cells of other organism	23	4	0.37	0.31637
GO:2000113	negative regulation of cellular macromolecule biosynthetic process	157	4	2.51	0.31718
GO:0010558	negative regulation of macromolecule biosynthetic process	157	4	2.51	0.31718
GO:0048584	positive regulation of response to stimulus	69	0	1.1	0.31789
GO:0046471	phosphatidylglycerol metabolic process	10	0	0.16	0.31828
GO:0006655	phosphatidylglycerol biosynthetic process	10	0	0.16	0.31828
GO:0006998	nuclear envelope organization	7	0	0.11	0.31835
GO:0031468	nuclear envelope reassembly	7	0	0.11	0.31835
GO:0006505	GPI anchor metabolic process	38	0	0.61	0.31881
GO:0006506	GPI anchor biosynthetic process	38	0	0.61	0.31881
GO:0010315	auxin efflux	18	2	0.29	0.31905
GO:0046700	heterocycle catabolic process	361	6	5.78	0.31907
GO:0032447	protein urmylation	7	0	0.11	0.31983
GO:0045944	positive regulation of transcription from RNA polymerase II promoter	106	1	1.7	0.3204
GO:1901071	glucosamine-containing compound metabolic process	39	0	0.62	0.32054
GO:1901072	glucosamine-containing compound catabolic process	39	0	0.62	0.32054
GO:0046348	amino sugar catabolic process	39	0	0.62	0.32054
GO:0006026	aminoglycan catabolic process	39	0	0.62	0.32054
GO:0006030	chitin metabolic process	39	0	0.62	0.32054
GO:0006032	chitin catabolic process	39	0	0.62	0.32054
GO:0044092	negative regulation of molecular function	263	8	4.21	0.32196
GO:0043269	regulation of ion transport	22	0	0.35	0.32222
GO:0045931	positive regulation of mitotic cell cycle	7	0	0.11	0.32241
GO:0007049	cell cycle	511	13	8.18	0.32302
GO:0005975	carbohydrate metabolic process	1902	48	30.44	0.3231
GO:0042493	response to drug	133	4	2.13	0.32329
GO:0006855	drug transmembrane transport	133	4	2.13	0.32329
GO:0015893	drug transport	133	4	2.13	0.32329
GO:0006612	protein targeting to membrane	42	0	0.67	0.32366
GO:0009567	double fertilization forming a zygote and endosperm	14	0	0.22	0.32369
GO:0010345	suberin biosynthetic process	13	0	0.21	0.32397
GO:0006913	nucleocytoplasmic transport	162	4	2.59	0.32405
GO:0051169	nuclear transport	162	4	2.59	0.32405
GO:0009740	gibberellic acid mediated signaling pathway	39	0	0.62	0.32412
GO:0046654	tetrahydrofolate biosynthetic process	8	0	0.13	0.32461
GO:0009620	response to fungus	130	6	2.08	0.32536
GO:0035266	meristem growth	28	0	0.45	0.32575
GO:0042126	nitrate metabolic process	8	0	0.13	0.3258
GO:0042128	nitrate assimilation	8	0	0.13	0.3258
GO:2001057	reactive nitrogen species metabolic process	8	0	0.13	0.3258
GO:0010053	root epidermal cell differentiation	35	0	0.56	0.32796
GO:0044283	small molecule biosynthetic process	951	8	15.22	0.32808
GO:0042593	glucose homeostasis	12	0	0.19	0.32828
GO:0001678	cellular glucose homeostasis	12	0	0.19	0.32828
GO:0065002	intracellular protein transmembrane transport	103	0	1.65	0.32836
GO:0019217	regulation of fatty acid metabolic process	15	0	0.24	0.32931
GO:1901699	cellular response to nitrogen compound	44	2	0.7	0.32985
GO:0051336	regulation of hydrolase activity	279	8	4.46	0.3299
GO:0010388	cullin deneddylation	15	0	0.24	0.33095
GO:0000338	protein deneddylation	15	0	0.24	0.33095
GO:0009073	aromatic amino acid family biosynthetic process	76	1	1.22	0.33126
GO:0009891	positive regulation of biosynthetic process	233	4	3.73	0.33156
GO:0009164	nucleoside catabolic process	143	2	2.29	0.33167
GO:0035404	histone-serine phosphorylation	7	2	0.11	0.33218
GO:0009890	negative regulation of biosynthetic process	170	4	2.72	0.33239
GO:0046467	membrane lipid biosynthetic process	72	0	1.15	0.33266
GO:0009395	phospholipid catabolic process	21	0	0.34	0.33346
GO:0042537	benzene-containing compound metabolic process	32	0	0.51	0.3338
GO:0048194	Golgi vesicle budding	15	0	0.24	0.33497
GO:0043241	protein complex disassembly	69	2	1.1	0.33519
GO:0006570	tyrosine metabolic process	11	1	0.18	0.33637
GO:0006259	DNA metabolic process	917	38	14.67	0.33663
GO:0010109	regulation of photosynthesis	25	0	0.4	0.33739
GO:0043044	ATP-dependent chromatin remodeling	10	0	0.16	0.33833
GO:0050778	positive regulation of immune response	26	0	0.42	0.3385
GO:0002684	positive regulation of immune system process	26	0	0.42	0.3385
GO:0045089	positive regulation of innate immune response	26	0	0.42	0.3385
GO:0018193	peptidyl-amino acid modification	512	3	8.19	0.33852
GO:0006885	regulation of pH	81	0	1.3	0.33889
GO:0051252	regulation of RNA metabolic process	2048	50	32.77	0.33921
GO:0051179	localization	4508	57	72.14	0.33967
GO:0065003	macromolecular complex assembly	945	21	15.12	0.34348
GO:0071577	zinc ion transmembrane transport	48	0	0.77	0.34408
GO:0015833	peptide transport	41	1	0.66	0.34461
GO:0016998	cell wall macromolecule catabolic process	43	0	0.69	0.34483
GO:0009558	embryo sac cellularization	6	0	0.1	0.34511
GO:0007349	cellularization	6	0	0.1	0.34511
GO:0098734	macromolecule depalmitoylation	16	2	0.26	0.34519
GO:0000470	maturation of LSU-rRNA	77	1	1.23	0.34536
GO:0043933	macromolecular complex subunit organization	1090	25	17.44	0.34545
GO:0009590	detection of gravity	6	0	0.1	0.34596
GO:0048316	seed development	267	6	4.27	0.34632
GO:0015716	organic phosphonate transport	7	0	0.11	0.34648
GO:0010228	vegetative to reproductive phase transition of meristem	91	2	1.46	0.34658
GO:0044703	multi-organism reproductive process	181	3	2.9	0.34665
GO:0042023	DNA endoreduplication	22	0	0.35	0.34675
GO:2000038	regulation of stomatal complex development	6	0	0.1	0.34729
GO:0019632	shikimate metabolic process	11	0	0.18	0.34767
GO:0009809	lignin biosynthetic process	49	0	0.78	0.34792
GO:0019243	methylglyoxal catabolic process to D-lactate	6	0	0.1	0.3491
GO:0006089	lactate metabolic process	6	0	0.1	0.3491
GO:0008645	hexose transport	52	0	0.83	0.34915
GO:0046083	adenine metabolic process	13	0	0.21	0.34956
GO:0046084	adenine biosynthetic process	13	0	0.21	0.34956
GO:0002128	tRNA nucleoside ribose methylation	6	0	0.1	0.34957
GO:0006900	membrane budding	52	0	0.83	0.34961
GO:0034308	primary alcohol metabolic process	11	0	0.18	0.35
GO:0030162	regulation of proteolysis	134	6	2.14	0.35036
GO:0001666	response to hypoxia	16	0	0.26	0.35165
GO:0036293	response to decreased oxygen levels	16	0	0.26	0.35165
GO:0072599	establishment of protein localization to endoplasmic reticulum	32	0	0.51	0.35173
GO:0045047	protein targeting to ER	32	0	0.51	0.35173
GO:0097031	mitochondrial respiratory chain complex I biogenesis	9	0	0.14	0.35249
GO:0034067	protein localization to Golgi apparatus	10	0	0.16	0.35355
GO:0000956	nuclear-transcribed mRNA catabolic process	90	1	1.44	0.35421
GO:0007098	centrosome cycle	20	0	0.32	0.35574
GO:0051297	centrosome organization	20	0	0.32	0.35574
GO:0009832	plant-type cell wall biogenesis	110	2	1.76	0.35575
GO:0009269	response to desiccation	16	0	0.26	0.35612
GO:0009853	photorespiration	39	0	0.62	0.3565
GO:0043624	cellular protein complex disassembly	67	2	1.07	0.35682
GO:0046949	fatty-acyl-CoA biosynthetic process	28	0	0.45	0.35765
GO:0043086	negative regulation of catalytic activity	260	8	4.16	0.358
GO:0031349	positive regulation of defense response	30	0	0.48	0.35891
GO:0072525	pyridine-containing compound biosynthetic process	43	0	0.69	0.35943
GO:0072330	monocarboxylic acid biosynthetic process	355	3	5.68	0.35944
GO:0043572	plastid fission	28	0	0.45	0.35977
GO:0010020	chloroplast fission	28	0	0.45	0.35977
GO:0016925	protein sumoylation	24	0	0.38	0.35993
GO:0046185	aldehyde catabolic process	9	0	0.14	0.36059
GO:0032196	transposition	18	0	0.29	0.36122
GO:0043170	macromolecule metabolic process	11895	205	190.35	0.36171
GO:0016310	phosphorylation	2646	42	42.34	0.36288
GO:0044743	intracellular protein transmembrane import	101	0	1.62	0.36302
GO:0042886	amide transport	48	1	0.77	0.36338
GO:0010941	regulation of cell death	49	0	0.78	0.36368
GO:0032787	monocarboxylic acid metabolic process	838	12	13.41	0.36377
GO:0042159	lipoprotein catabolic process	14	2	0.22	0.36426
GO:0002084	protein depalmitoylation	14	2	0.22	0.36426
GO:0015791	polyol transport	60	4	0.96	0.36572
GO:0000291	nuclear-transcribed mRNA catabolic process, exonucleolytic	20	0	0.32	0.36655
GO:0042398	cellular modified amino acid biosynthetic process	60	0	0.96	0.36776
GO:0010337	regulation of salicylic acid metabolic process	6	0	0.1	0.36841
GO:0009697	salicylic acid biosynthetic process	6	0	0.1	0.36841
GO:0006644	phospholipid metabolic process	252	0	4.03	0.36853
GO:0031328	positive regulation of cellular biosynthetic process	231	4	3.7	0.36876
GO:0008295	spermidine biosynthetic process	17	0	0.27	0.36879
GO:0006546	glycine catabolic process	13	2	0.21	0.36917
GO:0017148	negative regulation of translation	18	0	0.29	0.36938
GO:2000242	negative regulation of reproductive process	21	0	0.34	0.36941
GO:0048638	regulation of developmental growth	41	1	0.66	0.36958
GO:0008284	positive regulation of cell proliferation	13	0	0.21	0.36988
GO:0032259	methylation	575	6	9.2	0.37038
GO:0052482	defense response by cell wall thickening	10	0	0.16	0.37173
GO:0052542	defense response by callose deposition	10	0	0.16	0.37173
GO:0052544	defense response by callose deposition in cell wall	10	0	0.16	0.37173
GO:0006886	intracellular protein transport	633	6	10.13	0.372
GO:0009893	positive regulation of metabolic process	367	8	5.87	0.37243
GO:0000160	phosphorelay signal transduction system	152	3	2.43	0.37254
GO:0015850	organic hydroxy compound transport	65	4	1.04	0.3732
GO:0060236	regulation of mitotic spindle organization	8	0	0.13	0.37583
GO:0090224	regulation of spindle organization	8	0	0.13	0.37583
GO:0051193	regulation of cofactor metabolic process	8	0	0.13	0.37709
GO:0031050	dsRNA fragmentation	42	2	0.67	0.37741
GO:0071359	cellular response to dsRNA	42	2	0.67	0.37741
GO:0043331	response to dsRNA	42	2	0.67	0.37741
GO:0070918	production of small RNA involved in gene silencing by RNA	42	2	0.67	0.37741
GO:0045338	farnesyl diphosphate metabolic process	10	0	0.16	0.37808
GO:0097502	mannosylation	23	0	0.37	0.37883
GO:1901361	organic cyclic compound catabolic process	432	6	6.91	0.37905
GO:0006575	cellular modified amino acid metabolic process	215	2	3.44	0.37915
GO:0090333	regulation of stomatal closure	6	0	0.1	0.37916
GO:0031056	regulation of histone modification	30	0	0.48	0.37938
GO:0043328	protein targeting to vacuole involved in ubiquitin-dependent protein catabolic process via the multivesicular body sorting pathway	11	0	0.18	0.37959
GO:0032511	late endosome to vacuole transport via multivesicular body sorting pathway	11	0	0.18	0.37959
GO:0043162	ubiquitin-dependent protein catabolic process via the multivesicular body sorting pathway	11	0	0.18	0.37959
GO:1900618	regulation of shoot system morphogenesis	6	0	0.1	0.38005
GO:0097428	protein maturation by iron-sulfur cluster transfer	12	0	0.19	0.3802
GO:0034622	cellular macromolecular complex assembly	881	21	14.1	0.38022
GO:0008299	isoprenoid biosynthetic process	198	1	3.17	0.38044
GO:0006825	copper ion transport	22	0	0.35	0.38063
GO:0009741	response to brassinosteroid	55	1	0.88	0.38123
GO:0009834	plant-type secondary cell wall biogenesis	33	2	0.53	0.38134
GO:0022607	cellular component assembly	1115	22	17.84	0.38162
GO:0051259	protein oligomerization	32	0	0.51	0.38185
GO:0031325	positive regulation of cellular metabolic process	360	8	5.76	0.38191
GO:0009799	specification of symmetry	8	0	0.13	0.38242
GO:0009813	flavonoid biosynthetic process	229	7	3.66	0.38366
GO:0045491	xylan metabolic process	50	1	0.8	0.38389
GO:0031058	positive regulation of histone modification	21	0	0.34	0.38431
GO:1903310	positive regulation of chromatin modification	21	0	0.34	0.38431
GO:0042436	indole-containing compound catabolic process	6	0	0.1	0.38494
GO:0006569	tryptophan catabolic process	6	0	0.1	0.38494
GO:0019441	tryptophan catabolic process to kynurenine	6	0	0.1	0.38494
GO:0046218	indolalkylamine catabolic process	6	0	0.1	0.38494
GO:0070189	kynurenine metabolic process	6	0	0.1	0.38494
GO:0051347	positive regulation of transferase activity	54	3	0.86	0.38549
GO:0000070	mitotic sister chromatid segregation	32	1	0.51	0.3866
GO:0044712	single-organism catabolic process	997	22	15.95	0.38678
GO:0018195	peptidyl-arginine modification	15	0	0.24	0.38679
GO:0018216	peptidyl-arginine methylation	15	0	0.24	0.38679
GO:0009640	photomorphogenesis	50	2	0.8	0.38706
GO:0022904	respiratory electron transport chain	202	0	3.23	0.38715
GO:1901606	alpha-amino acid catabolic process	77	4	1.23	0.3876
GO:0006352	DNA-templated transcription, initiation	123	0	1.97	0.38774
GO:0015793	glycerol transport	54	4	0.86	0.3881
GO:0090332	stomatal closure	13	0	0.21	0.38817
GO:0009169	purine ribonucleoside monophosphate catabolic process	6	0	0.1	0.38824
GO:0009158	ribonucleoside monophosphate catabolic process	6	0	0.1	0.38824
GO:0009125	nucleoside monophosphate catabolic process	6	0	0.1	0.38824
GO:0009128	purine nucleoside monophosphate catabolic process	6	0	0.1	0.38824
GO:0006200	ATP catabolic process	6	0	0.1	0.38824
GO:0043462	regulation of ATPase activity	6	0	0.1	0.38824
GO:1903289	regulation of ATP catabolic process	6	0	0.1	0.38824
GO:0001558	regulation of cell growth	35	1	0.56	0.38849
GO:1902589	single-organism organelle organization	859	15	13.75	0.38867
GO:0022414	reproductive process	745	17	11.92	0.38908
GO:0009262	deoxyribonucleotide metabolic process	18	2	0.29	0.3902
GO:0051026	chiasma assembly	6	0	0.1	0.39056
GO:0008654	phospholipid biosynthetic process	120	0	1.92	0.39186
GO:1902680	positive regulation of RNA biosynthetic process	177	4	2.83	0.39196
GO:0051128	regulation of cellular component organization	301	4	4.82	0.39207
GO:0007021	tubulin complex assembly	10	1	0.16	0.39247
GO:0072668	tubulin complex biogenesis	10	1	0.16	0.39247
GO:0044270	cellular nitrogen compound catabolic process	363	5	5.81	0.39291
GO:0046907	intracellular transport	874	7	13.99	0.39328
GO:0008614	pyridoxine metabolic process	6	0	0.1	0.39379
GO:0010476	gibberellin mediated signaling pathway	41	0	0.66	0.39391
GO:0071370	cellular response to gibberellin stimulus	41	0	0.66	0.39391
GO:0006402	mRNA catabolic process	101	1	1.62	0.394
GO:0009992	cellular water homeostasis	57	4	0.91	0.39449
GO:0043066	negative regulation of apoptotic process	6	0	0.1	0.39459
GO:0051302	regulation of cell division	64	4	1.02	0.39461
GO:0071029	nuclear ncRNA surveillance	6	0	0.1	0.3948
GO:0071046	nuclear polyadenylation-dependent ncRNA catabolic process	6	0	0.1	0.3948
GO:0071035	nuclear polyadenylation-dependent rRNA catabolic process	6	0	0.1	0.3948
GO:0071038	nuclear polyadenylation-dependent tRNA catabolic process	6	0	0.1	0.3948
GO:0043633	polyadenylation-dependent RNA catabolic process	6	0	0.1	0.3948
GO:0043634	polyadenylation-dependent ncRNA catabolic process	6	0	0.1	0.3948
GO:0000467	exonucleolytic trimming to generate mature 3'-end of 5.8S rRNA from tricistronic rRNA transcript (SSU-rRNA, 5.8S rRNA, LSU-rRNA)	6	0	0.1	0.3948
GO:0000459	exonucleolytic trimming involved in rRNA processing	6	0	0.1	0.3948
GO:0016078	tRNA catabolic process	6	0	0.1	0.3948
GO:0043928	exonucleolytic nuclear-transcribed mRNA catabolic process involved in deadenylation-dependent decay	6	0	0.1	0.3948
GO:0043288	apocarotenoid metabolic process	13	1	0.21	0.39504
GO:0032886	regulation of microtubule-based process	15	0	0.24	0.39581
GO:0006450	regulation of translational fidelity	52	0	0.83	0.39699
GO:0072523	purine-containing compound catabolic process	160	2	2.56	0.39795
GO:0044419	interspecies interaction between organisms	36	0	0.58	0.39807
GO:0044403	symbiosis, encompassing mutualism through parasitism	36	0	0.58	0.39807
GO:0048511	rhythmic process	22	0	0.35	0.39812
GO:0007623	circadian rhythm	22	0	0.35	0.39812
GO:0009102	biotin biosynthetic process	8	0	0.13	0.39817
GO:0006768	biotin metabolic process	8	0	0.13	0.39817
GO:0098542	defense response to other organism	242	6	3.87	0.3983
GO:0098655	cation transmembrane transport	764	1	12.23	0.39891
GO:0030198	extracellular matrix organization	43	0	0.69	0.39905
GO:0071668	plant-type cell wall assembly	43	0	0.69	0.39905
GO:0070726	cell wall assembly	43	0	0.69	0.39905
GO:0043062	extracellular structure organization	43	0	0.69	0.39905
GO:0010215	cellulose microfibril organization	43	0	0.69	0.39905
GO:0045893	positive regulation of transcription, DNA-templated	174	4	2.78	0.39967
GO:0045892	negative regulation of transcription, DNA-templated	126	4	2.02	0.39981
GO:1902679	negative regulation of RNA biosynthetic process	126	4	2.02	0.39981
GO:0051253	negative regulation of RNA metabolic process	126	4	2.02	0.39981
GO:2001251	negative regulation of chromosome organization	16	0	0.26	0.4002
GO:0006810	transport	4354	52	69.68	0.40109
GO:2000033	regulation of seed dormancy process	9	0	0.14	0.40111
GO:0034472	snRNA 3'-end processing	12	0	0.19	0.40157
GO:0010363	regulation of plant-type hypersensitive response	8	0	0.13	0.40164
GO:0070126	mitochondrial translational termination	8	0	0.13	0.40214
GO:0051053	negative regulation of DNA metabolic process	17	0	0.27	0.40221
GO:0009069	serine family amino acid metabolic process	84	2	1.34	0.40346
GO:0051596	methylglyoxal catabolic process	8	0	0.13	0.40388
GO:0009438	methylglyoxal metabolic process	8	0	0.13	0.40388
GO:0051234	establishment of localization	4402	54	70.44	0.40471
GO:0033500	carbohydrate homeostasis	14	0	0.22	0.4048
GO:0010154	fruit development	312	6	4.99	0.40496
GO:0034762	regulation of transmembrane transport	14	0	0.22	0.40524
GO:0034765	regulation of ion transmembrane transport	14	0	0.22	0.40524
GO:0042559	pteridine-containing compound biosynthetic process	29	0	0.46	0.40639
GO:0000463	maturation of LSU-rRNA from tricistronic rRNA transcript (SSU-rRNA, 5.8S rRNA, LSU-rRNA)	29	0	0.46	0.40661
GO:0006022	aminoglycan metabolic process	48	0	0.77	0.40725
GO:0010205	photoinhibition	11	0	0.18	0.40729
GO:0043155	negative regulation of photosynthesis, light reaction	11	0	0.18	0.40729
GO:0019220	regulation of phosphate metabolic process	338	8	5.41	0.40743
GO:0051174	regulation of phosphorus metabolic process	338	8	5.41	0.40743
GO:0019284	L-methionine biosynthetic process from S-adenosylmethionine	6	0	0.1	0.40785
GO:0072529	pyrimidine-containing compound catabolic process	11	0	0.18	0.40795
GO:0046487	glyoxylate metabolic process	15	0	0.24	0.40869
GO:0030042	actin filament depolymerization	23	2	0.37	0.4087
GO:0051261	protein depolymerization	23	2	0.37	0.4087
GO:0000904	cell morphogenesis involved in differentiation	67	0	1.07	0.40932
GO:0009938	negative regulation of gibberellic acid mediated signaling pathway	12	0	0.19	0.40969
GO:1901605	alpha-amino acid metabolic process	515	9	8.24	0.4102
GO:0070125	mitochondrial translational elongation	15	1	0.24	0.41055
GO:0000079	regulation of cyclin-dependent protein serine/threonine kinase activity	26	2	0.42	0.4107
GO:0006415	translational termination	39	0	0.62	0.4108
GO:0071806	protein transmembrane transport	126	0	2.02	0.41094
GO:0006613	cotranslational protein targeting to membrane	31	0	0.5	0.41132
GO:0006614	SRP-dependent cotranslational protein targeting to membrane	31	0	0.5	0.41132
GO:0009894	regulation of catabolic process	240	3	3.84	0.41159
GO:0035821	modification of morphology or physiology of other organism	30	4	0.48	0.41163
GO:0009812	flavonoid metabolic process	258	8	4.13	0.4119
GO:0006833	water transport	56	4	0.9	0.41196
GO:0042044	fluid transport	56	4	0.9	0.41196
GO:0009098	leucine biosynthetic process	10	0	0.16	0.41224
GO:0048581	negative regulation of post-embryonic development	45	0	0.72	0.41287
GO:0006571	tyrosine biosynthetic process	7	1	0.11	0.41312
GO:0019419	sulfate reduction	9	0	0.14	0.4136
GO:0009751	response to salicylic acid	42	2	0.67	0.41462
GO:0042558	pteridine-containing compound metabolic process	61	0	0.98	0.41495
GO:0006974	cellular response to DNA damage stimulus	355	13	5.68	0.41503
GO:0007186	G-protein coupled receptor signaling pathway	32	0	0.51	0.41525
GO:0048280	vesicle fusion with Golgi apparatus	16	0	0.26	0.41538
GO:0042726	flavin-containing compound metabolic process	23	0	0.37	0.41611
GO:0032543	mitochondrial translation	64	1	1.02	0.41635
GO:0033108	mitochondrial respiratory chain complex assembly	34	0	0.54	0.41642
GO:0009106	lipoate metabolic process	13	0	0.21	0.41726
GO:0009107	lipoate biosynthetic process	13	0	0.21	0.41726
GO:0009249	protein lipoylation	13	0	0.21	0.41726
GO:1902275	regulation of chromatin organization	32	0	0.51	0.41841
GO:1903308	regulation of chromatin modification	32	0	0.51	0.41841
GO:0018065	protein-cofactor linkage	17	0	0.27	0.41891
GO:0033962	cytoplasmic mRNA processing body assembly	22	0	0.35	0.41895
GO:0032879	regulation of localization	111	0	1.78	0.41927
GO:0051570	regulation of histone H3-K9 methylation	8	0	0.13	0.4199
GO:0046686	response to cadmium ion	17	0	0.27	0.41993
GO:0030243	cellulose metabolic process	110	6	1.76	0.42164
GO:0018904	ether metabolic process	57	1	0.91	0.42195
GO:0006662	glycerol ether metabolic process	57	1	0.91	0.42195
GO:0006914	autophagy	71	0	1.14	0.42198
GO:0051188	cofactor biosynthetic process	271	0	4.34	0.42255
GO:0018206	peptidyl-methionine modification	8	0	0.13	0.4226
GO:0017196	N-terminal peptidyl-methionine acetylation	8	0	0.13	0.4226
GO:0045489	pectin biosynthetic process	40	0	0.64	0.42322
GO:0042364	water-soluble vitamin biosynthetic process	62	0	0.99	0.42368
GO:0009808	lignin metabolic process	67	0	1.07	0.42388
GO:0006890	retrograde vesicle-mediated transport, Golgi to ER	43	0	0.69	0.4239
GO:0071804	cellular potassium ion transport	116	1	1.86	0.42429
GO:0071805	potassium ion transmembrane transport	116	1	1.86	0.42429
GO:0010387	COP9 signalosome assembly	6	0	0.1	0.42484
GO:0009250	glucan biosynthetic process	145	3	2.32	0.42579
GO:0010565	regulation of cellular ketone metabolic process	43	0	0.69	0.42586
GO:1902221	erythrose 4-phosphate/phosphoenolpyruvate family amino acid metabolic process	31	0	0.5	0.42654
GO:0006558	L-phenylalanine metabolic process	31	0	0.5	0.42654
GO:0015980	energy derivation by oxidation of organic compounds	373	0	5.97	0.42738
GO:0016071	mRNA metabolic process	517	2	8.27	0.42744
GO:0032956	regulation of actin cytoskeleton organization	35	1	0.56	0.4276
GO:0032970	regulation of actin filament-based process	35	1	0.56	0.4276
GO:1901607	alpha-amino acid biosynthetic process	342	4	5.47	0.42761
GO:1902531	regulation of intracellular signal transduction	57	1	0.91	0.42814
GO:0040008	regulation of growth	78	1	1.25	0.42901
GO:0006308	DNA catabolic process	10	0	0.16	0.43034
GO:0022900	electron transport chain	403	1	6.45	0.43104
GO:0016569	covalent chromatin modification	186	4	2.98	0.43108
GO:0006884	cell volume homeostasis	59	4	0.94	0.43147
GO:0009396	folic acid-containing compound biosynthetic process	27	0	0.43	0.43245
GO:0010099	regulation of photomorphogenesis	9	0	0.14	0.4326
GO:2000030	regulation of response to red or far red light	9	0	0.14	0.4326
GO:0015766	disaccharide transport	14	0	0.22	0.43321
GO:0015770	sucrose transport	14	0	0.22	0.43321
GO:0015772	oligosaccharide transport	14	0	0.22	0.43321
GO:0071367	cellular response to brassinosteroid stimulus	45	1	0.72	0.43415
GO:0071383	cellular response to steroid hormone stimulus	45	1	0.72	0.43415
GO:0048545	response to steroid hormone	45	1	0.72	0.43415
GO:0009742	brassinosteroid mediated signaling pathway	45	1	0.72	0.43415
GO:0043401	steroid hormone mediated signaling pathway	45	1	0.72	0.43415
GO:0045185	maintenance of protein location	32	1	0.51	0.43449
GO:0044804	nucleophagy	16	0	0.26	0.43502
GO:0051094	positive regulation of developmental process	40	1	0.64	0.43535
GO:0006814	sodium ion transport	31	0	0.5	0.43572
GO:0031401	positive regulation of protein modification process	80	3	1.28	0.43592
GO:0035434	copper ion transmembrane transport	17	0	0.27	0.43636
GO:0070828	heterochromatin organization	14	0	0.22	0.43675
GO:0019464	glycine decarboxylation via glycine cleavage system	10	2	0.16	0.43698
GO:0019953	sexual reproduction	56	1	0.9	0.43702
GO:0009688	abscisic acid biosynthetic process	8	0	0.13	0.43704
GO:0008154	actin polymerization or depolymerization	51	3	0.82	0.4373
GO:0007010	cytoskeleton organization	216	6	3.46	0.43737
GO:0051129	negative regulation of cellular component organization	43	2	0.69	0.43798
GO:0010639	negative regulation of organelle organization	43	2	0.69	0.43798
GO:0006629	lipid metabolic process	1276	11	20.42	0.43838
GO:0048825	cotyledon development	9	1	0.14	0.4395
GO:0009966	regulation of signal transduction	253	5	4.05	0.43976
GO:0010557	positive regulation of macromolecule biosynthetic process	227	4	3.63	0.43976
GO:0034661	ncRNA catabolic process	23	1	0.37	0.44108
GO:0009452	7-methylguanosine RNA capping	15	0	0.24	0.44165
GO:0036260	RNA capping	15	0	0.24	0.44165
GO:0000303	response to superoxide	37	1	0.59	0.442
GO:0000305	response to oxygen radical	37	1	0.59	0.442
GO:0015991	ATP hydrolysis coupled proton transport	160	0	2.56	0.44226
GO:0015988	energy coupled proton transmembrane transport, against electrochemical gradient	160	0	2.56	0.44226
GO:0090421	embryonic meristem initiation	6	0	0.1	0.44255
GO:0010604	positive regulation of macromolecule metabolic process	352	8	5.63	0.44284
GO:0006357	regulation of transcription from RNA polymerase II promoter	256	4	4.1	0.44327
GO:0010243	response to organonitrogen compound	7	0	0.11	0.44407
GO:0000910	cytokinesis	187	6	2.99	0.44419
GO:0010921	regulation of phosphatase activity	93	1	1.49	0.44595
GO:0018344	protein geranylgeranylation	9	0	0.14	0.44631
GO:0051510	regulation of unidimensional cell growth	18	1	0.29	0.44714
GO:1901642	nucleoside transmembrane transport	24	0	0.38	0.44741
GO:0009686	gibberellin biosynthetic process	23	0	0.37	0.44761
GO:0043043	peptide biosynthetic process	9	0	0.14	0.44761
GO:0000707	meiotic DNA recombinase assembly	6	0	0.1	0.44798
GO:0006520	cellular amino acid metabolic process	880	11	14.08	0.44875
GO:0016122	xanthophyll metabolic process	19	0	0.3	0.44945
GO:0009913	epidermal cell differentiation	91	0	1.46	0.44998
GO:0030855	epithelial cell differentiation	91	0	1.46	0.44998
GO:0033014	tetrapyrrole biosynthetic process	81	0	1.3	0.45021
GO:0031146	SCF-dependent proteasomal ubiquitin-dependent protein catabolic process	44	0	0.7	0.45038
GO:0006857	oligopeptide transport	39	1	0.62	0.4508
GO:0010586	miRNA metabolic process	7	0	0.11	0.45201
GO:1901566	organonitrogen compound biosynthetic process	1103	11	17.65	0.45221
GO:0016560	protein import into peroxisome matrix, docking	7	0	0.11	0.45244
GO:0022615	protein to membrane docking	7	0	0.11	0.45244
GO:0006313	transposition, DNA-mediated	14	0	0.22	0.453
GO:0030004	cellular monovalent inorganic cation homeostasis	54	0	0.86	0.4531
GO:0034285	response to disaccharide	23	0	0.37	0.45323
GO:0006452	translational frameshifting	9	0	0.14	0.45334
GO:0006449	regulation of translational termination	9	0	0.14	0.45334
GO:0043243	positive regulation of protein complex disassembly	9	0	0.14	0.45334
GO:0045901	positive regulation of translational elongation	9	0	0.14	0.45334
GO:0045905	positive regulation of translational termination	9	0	0.14	0.45334
GO:0044772	mitotic cell cycle phase transition	50	3	0.8	0.45377
GO:0009074	aromatic amino acid family catabolic process	28	0	0.45	0.45404
GO:0035966	response to topologically incorrect protein	21	0	0.34	0.45415
GO:1901565	organonitrogen compound catabolic process	353	6	5.65	0.45424
GO:0000059	protein import into nucleus, docking	30	0	0.48	0.4544
GO:0009908	flower development	205	10	3.28	0.4545
GO:0009072	aromatic amino acid family metabolic process	113	1	1.81	0.4555
GO:0070932	histone H3 deacetylation	10	0	0.16	0.45572
GO:0023051	regulation of signaling	255	5	4.08	0.45606
GO:0010646	regulation of cell communication	255	5	4.08	0.45606
GO:0000480	endonucleolytic cleavage in 5'-ETS of tricistronic rRNA transcript (SSU-rRNA, 5.8S rRNA, LSU-rRNA)	6	0	0.1	0.45623
GO:0009063	cellular amino acid catabolic process	85	4	1.36	0.45685
GO:0006304	DNA modification	35	2	0.56	0.45768
GO:0044728	DNA methylation or demethylation	35	2	0.56	0.45768
GO:0030104	water homeostasis	60	4	0.96	0.45818
GO:0009698	phenylpropanoid metabolic process	154	1	2.46	0.45829
GO:0006281	DNA repair	335	13	5.36	0.45974
GO:0005982	starch metabolic process	53	2	0.85	0.45995
GO:2001252	positive regulation of chromosome organization	24	0	0.38	0.46061
GO:0031118	rRNA pseudouridine synthesis	8	1	0.13	0.46134
GO:0045116	protein neddylation	20	0	0.32	0.4615
GO:0000082	G1/S transition of mitotic cell cycle	10	1	0.16	0.46267
GO:0016143	S-glycoside metabolic process	25	1	0.4	0.46275
GO:0019760	glucosinolate metabolic process	25	1	0.4	0.46275
GO:0019757	glycosinolate metabolic process	25	1	0.4	0.46275
GO:0016571	histone methylation	75	1	1.2	0.46285
GO:0035384	thioester biosynthetic process	43	0	0.69	0.46349
GO:0071616	acyl-CoA biosynthetic process	43	0	0.69	0.46349
GO:0007015	actin filament organization	71	3	1.14	0.46364
GO:0044208	'de novo' AMP biosynthetic process	8	0	0.13	0.46386
GO:0043628	ncRNA 3'-end processing	28	0	0.45	0.46455
GO:0044786	cell cycle DNA replication	31	0	0.5	0.46481
GO:1901136	carbohydrate derivative catabolic process	212	2	3.39	0.46558
GO:1903046	meiotic cell cycle process	74	1	1.18	0.46583
GO:0009583	detection of light stimulus	20	0	0.32	0.46685
GO:0006891	intra-Golgi vesicle-mediated transport	68	0	1.09	0.46696
GO:0010394	homogalacturonan metabolic process	6	0	0.1	0.46734
GO:0010289	homogalacturonan biosynthetic process	6	0	0.1	0.46734
GO:1902241	copal-8-ol diphosphate(3-) metabolic process	10	0	0.16	0.4674
GO:0046417	chorismate metabolic process	23	0	0.37	0.46741
GO:0009910	negative regulation of flower development	19	0	0.3	0.46757
GO:0043666	regulation of phosphoprotein phosphatase activity	91	1	1.46	0.46804
GO:0019439	aromatic compound catabolic process	421	5	6.74	0.46815
GO:0071705	nitrogen compound transport	450	8	7.2	0.46815
GO:0055114	oxidation-reduction process	3445	43	55.13	0.46871
GO:0040007	growth	285	3	4.56	0.46911
GO:0035435	phosphate ion transmembrane transport	6	0	0.1	0.46951
GO:0046033	AMP metabolic process	12	0	0.19	0.46966
GO:0006167	AMP biosynthetic process	12	0	0.19	0.46966
GO:0035195	gene silencing by miRNA	20	0	0.32	0.47073
GO:0009231	riboflavin biosynthetic process	21	0	0.34	0.47086
GO:0042727	flavin-containing compound biosynthetic process	21	0	0.34	0.47086
GO:0006771	riboflavin metabolic process	21	0	0.34	0.47086
GO:1902626	assembly of large subunit precursor of preribosome	11	0	0.18	0.47103
GO:0009584	detection of visible light	10	0	0.16	0.47104
GO:0032465	regulation of cytokinesis	12	2	0.19	0.4712
GO:0009909	regulation of flower development	76	3	1.22	0.47267
GO:0010197	polar nucleus fusion	25	1	0.4	0.47364
GO:0009559	embryo sac central cell differentiation	25	1	0.4	0.47364
GO:0051173	positive regulation of nitrogen compound metabolic process	197	4	3.15	0.47382
GO:0055067	monovalent inorganic cation homeostasis	93	0	1.49	0.47411
GO:0007004	telomere maintenance via telomerase	9	0	0.14	0.47465
GO:0010833	telomere maintenance via telomere lengthening	9	0	0.14	0.47465
GO:0016073	snRNA metabolic process	19	1	0.3	0.47493
GO:0009900	dehiscence	14	0	0.22	0.47496
GO:0035335	peptidyl-tyrosine dephosphorylation	50	1	0.8	0.47507
GO:0000184	nuclear-transcribed mRNA catabolic process, nonsense-mediated decay	19	0	0.3	0.4755
GO:0010628	positive regulation of gene expression	177	4	2.83	0.47639
GO:0034620	cellular response to unfolded protein	9	0	0.14	0.47648
GO:0009960	endosperm development	15	0	0.24	0.4767
GO:1902591	single-organism membrane budding	31	0	0.5	0.47818
GO:0006040	amino sugar metabolic process	64	0	1.02	0.47832
GO:0045995	regulation of embryonic development	9	0	0.14	0.47978
GO:0043405	regulation of MAP kinase activity	15	0	0.24	0.48012
GO:0061572	actin filament bundle organization	7	0	0.11	0.48045
GO:0051017	actin filament bundle assembly	7	0	0.11	0.48045
GO:0009110	vitamin biosynthetic process	74	0	1.18	0.48092
GO:0009630	gravitropism	33	2	0.53	0.48096
GO:0048508	embryonic meristem development	7	1	0.11	0.48122
GO:0006901	vesicle coating	28	0	0.45	0.48162
GO:0019748	secondary metabolic process	407	8	6.51	0.48252
GO:0008360	regulation of cell shape	40	0	0.64	0.48255
GO:0009314	response to radiation	332	6	5.31	0.48293
GO:0006863	purine nucleobase transport	7	1	0.11	0.4834
GO:0015851	nucleobase transport	7	1	0.11	0.4834
GO:0015853	adenine transport	7	1	0.11	0.4834
GO:0015854	guanine transport	7	1	0.11	0.4834
GO:0031329	regulation of cellular catabolic process	228	3	3.65	0.48366
GO:0006305	DNA alkylation	31	2	0.5	0.48378
GO:0006306	DNA methylation	31	2	0.5	0.48378
GO:0070727	cellular macromolecule localization	750	8	12	0.48434
GO:0006364	rRNA processing	350	2	5.6	0.48439
GO:0044550	secondary metabolite biosynthetic process	309	5	4.94	0.48515
GO:0015846	polyamine transport	8	0	0.13	0.48633
GO:0009855	determination of bilateral symmetry	6	0	0.1	0.48633
GO:0007129	synapsis	8	0	0.13	0.48686
GO:0006839	mitochondrial transport	103	0	1.65	0.48782
GO:0010608	posttranscriptional regulation of gene expression	228	2	3.65	0.48819
GO:0048573	photoperiodism, flowering	37	2	0.59	0.48821
GO:0009607	response to biotic stimulus	371	9	5.94	0.48829
GO:0006749	glutathione metabolic process	88	2	1.41	0.48914
GO:0009416	response to light stimulus	303	6	4.85	0.48981
GO:0032502	developmental process	1579	37	25.27	0.4908
GO:0006310	DNA recombination	160	5	2.56	0.49083
GO:0045682	regulation of epidermis development	7	0	0.11	0.4909
GO:0048236	plant-type spore development	10	0	0.16	0.4909
GO:0019563	glycerol catabolic process	8	0	0.13	0.49137
GO:0019405	alditol catabolic process	8	0	0.13	0.49137
GO:0016123	xanthophyll biosynthetic process	13	0	0.21	0.49142
GO:0072507	divalent inorganic cation homeostasis	37	0	0.59	0.49154
GO:0022604	regulation of cell morphogenesis	58	1	0.93	0.49187
GO:0050896	response to stimulus	4258	85	68.14	0.49214
GO:0010817	regulation of hormone levels	179	5	2.86	0.49243
GO:0048229	gametophyte development	204	2	3.26	0.49318
GO:0048645	organ formation	59	2	0.94	0.49375
GO:0034613	cellular protein localization	731	6	11.7	0.49399
GO:0035303	regulation of dephosphorylation	94	1	1.5	0.4946
GO:0006892	post-Golgi vesicle-mediated transport	33	0	0.53	0.49484
GO:0042773	ATP synthesis coupled electron transport	180	0	2.88	0.49503
GO:0046113	nucleobase catabolic process	21	0	0.34	0.49544
GO:0010629	negative regulation of gene expression	193	5	3.09	0.49556
GO:0009658	chloroplast organization	162	2	2.59	0.49693
GO:0016570	histone modification	177	3	2.83	0.49697
GO:0090501	RNA phosphodiester bond hydrolysis	161	5	2.58	0.4981
GO:0070482	response to oxygen levels	18	0	0.29	0.49857
GO:0051235	maintenance of location	92	1	1.47	0.49866
GO:1901698	response to nitrogen compound	62	2	0.99	0.49903
GO:0044767	single-organism developmental process	1536	31	24.58	0.49915
GO:0006897	endocytosis	72	0	1.15	0.49919
GO:0044257	cellular protein catabolic process	785	7	12.56	0.50035
GO:0032329	serine transport	6	0	0.1	0.50089
GO:0015825	L-serine transport	6	0	0.1	0.50089
GO:0019318	hexose metabolic process	150	1	2.4	0.50098
GO:0044571	[2Fe-2S] cluster assembly	6	0	0.1	0.50122
GO:0055082	cellular chemical homeostasis	298	8	4.77	0.50142
GO:0016072	rRNA metabolic process	355	3	5.68	0.50146
GO:0016482	cytoplasmic transport	478	4	7.65	0.50215
GO:0042723	thiamine-containing compound metabolic process	13	0	0.21	0.50258
GO:0006772	thiamine metabolic process	13	0	0.21	0.50258
GO:0006790	sulfur compound metabolic process	445	4	7.12	0.50283
GO:0006378	mRNA polyadenylation	17	0	0.27	0.50293
GO:0030490	maturation of SSU-rRNA	114	0	1.82	0.50412
GO:0009888	tissue development	263	9	4.21	0.50421
GO:0008216	spermidine metabolic process	19	0	0.3	0.50478
GO:0022402	cell cycle process	430	11	6.88	0.50506
GO:0009408	response to heat	88	4	1.41	0.50595
GO:0051701	interaction with host	22	0	0.35	0.50729
GO:0044711	single-organism biosynthetic process	2583	34	41.34	0.50798
GO:0000002	mitochondrial genome maintenance	7	0	0.11	0.50802
GO:1901564	organonitrogen compound metabolic process	2278	21	36.45	0.51021
GO:0071450	cellular response to oxygen radical	33	1	0.53	0.51049
GO:0071451	cellular response to superoxide	33	1	0.53	0.51049
GO:0019430	removal of superoxide radicals	33	1	0.53	0.51049
GO:0001708	cell fate specification	13	0	0.21	0.51077
GO:0031060	regulation of histone methylation	10	0	0.16	0.51227
GO:0000460	maturation of 5.8S rRNA	45	0	0.72	0.51243
GO:0048268	clathrin coat assembly	21	0	0.34	0.51272
GO:0044723	single-organism carbohydrate metabolic process	1029	18	16.47	0.51293
GO:0019722	calcium-mediated signaling	24	0	0.38	0.51348
GO:0019932	second-messenger-mediated signaling	24	0	0.38	0.51348
GO:0031570	DNA integrity checkpoint	11	0	0.18	0.51373
GO:0072344	rescue of stalled ribosome	6	0	0.1	0.51389
GO:0009845	seed germination	73	0	1.17	0.5142
GO:0080163	regulation of protein serine/threonine phosphatase activity	44	1	0.7	0.51444
GO:0046513	ceramide biosynthetic process	13	0	0.21	0.51465
GO:0000447	endonucleolytic cleavage in ITS1 to separate SSU-rRNA from 5.8S rRNA and LSU-rRNA from tricistronic rRNA transcript (SSU-rRNA, 5.8S rRNA, LSU-rRNA)	14	0	0.22	0.51474
GO:0046416	D-amino acid metabolic process	6	0	0.1	0.51478
GO:0009685	gibberellin metabolic process	36	0	0.58	0.51525
GO:0006760	folic acid-containing compound metabolic process	58	0	0.93	0.5156
GO:0042793	transcription from plastid promoter	13	1	0.21	0.51565
GO:0009555	pollen development	136	0	2.18	0.51592
GO:0031507	heterochromatin assembly	12	0	0.19	0.51673
GO:0007346	regulation of mitotic cell cycle	67	2	1.07	0.51775
GO:0090069	regulation of ribosome biogenesis	8	0	0.13	0.51799
GO:0006097	glyoxylate cycle	11	0	0.18	0.51888
GO:0043069	negative regulation of programmed cell death	18	0	0.29	0.51931
GO:0009615	response to virus	29	0	0.46	0.52003
GO:0009743	response to carbohydrate	40	0	0.64	0.52084
GO:0010160	formation of organ boundary	11	2	0.18	0.52194
GO:0048859	formation of anatomical boundary	11	2	0.18	0.52194
GO:0006465	signal peptide processing	40	0	0.64	0.52255
GO:0045184	establishment of protein localization	839	6	13.43	0.52262
GO:0000041	transition metal ion transport	101	1	1.62	0.52264
GO:0043096	purine nucleobase salvage	8	0	0.13	0.52377
GO:0010257	NADH dehydrogenase complex assembly	11	0	0.18	0.52402
GO:0006388	tRNA splicing, via endonucleolytic cleavage and ligation	8	0	0.13	0.52432
GO:0070507	regulation of microtubule cytoskeleton organization	12	0	0.19	0.52448
GO:0022618	ribonucleoprotein complex assembly	324	4	5.18	0.52461
GO:0034968	histone lysine methylation	52	1	0.83	0.52479
GO:0061512	protein localization to cilium	19	0	0.3	0.52492
GO:0016049	cell growth	216	3	3.46	0.52525
GO:0071826	ribonucleoprotein complex subunit organization	328	4	5.25	0.5253
GO:0015031	protein transport	821	6	13.14	0.52579
GO:0019915	lipid storage	30	0	0.48	0.52597
GO:0048609	multicellular organismal reproductive process	70	0	1.12	0.52609
GO:0009793	embryo development ending in seed dormancy	177	5	2.83	0.52658
GO:0006029	proteoglycan metabolic process	9	0	0.14	0.52739
GO:0009306	protein secretion	19	0	0.3	0.52755
GO:0009886	post-embryonic morphogenesis	79	0	1.26	0.52763
GO:0000226	microtubule cytoskeleton organization	119	3	1.9	0.5277
GO:0044770	cell cycle phase transition	55	3	0.88	0.52833
GO:0072596	establishment of protein localization to chloroplast	21	0	0.34	0.52839
GO:0072598	protein localization to chloroplast	21	0	0.34	0.52839
GO:0045036	protein targeting to chloroplast	21	0	0.34	0.52839
GO:0010364	regulation of ethylene biosynthetic process	12	0	0.19	0.52924
GO:0031335	regulation of sulfur amino acid metabolic process	12	0	0.19	0.52924
GO:1900911	regulation of olefin biosynthetic process	12	0	0.19	0.52924
GO:1900908	regulation of olefin metabolic process	12	0	0.19	0.52924
GO:0009648	photoperiodism	42	2	0.67	0.52992
GO:0007064	mitotic sister chromatid cohesion	10	0	0.16	0.53038
GO:0006448	regulation of translational elongation	63	0	1.01	0.53084
GO:0006950	response to stress	2057	45	32.92	0.53088
GO:0090068	positive regulation of cell cycle process	26	0	0.42	0.53097
GO:0046777	protein autophosphorylation	146	0	2.34	0.53116
GO:0036092	phosphatidylinositol-3-phosphate biosynthetic process	7	0	0.11	0.53186
GO:0031324	negative regulation of cellular metabolic process	212	4	3.39	0.5321
GO:0051716	cellular response to stimulus	2441	52	39.06	0.53306
GO:0010014	meristem initiation	12	0	0.19	0.53361
GO:0010959	regulation of metal ion transport	7	0	0.11	0.53565
GO:0034035	purine ribonucleoside bisphosphate metabolic process	12	0	0.19	0.53584
GO:0015969	guanosine tetraphosphate metabolic process	12	0	0.19	0.53584
GO:0000462	maturation of SSU-rRNA from tricistronic rRNA transcript (SSU-rRNA, 5.8S rRNA, LSU-rRNA)	96	0	1.54	0.53604
GO:2000241	regulation of reproductive process	120	3	1.92	0.5368
GO:0010019	chloroplast-nucleus signaling pathway	8	0	0.13	0.53807
GO:0006650	glycerophospholipid metabolic process	189	0	3.02	0.53847
GO:0070071	proton-transporting two-sector ATPase complex assembly	16	0	0.26	0.53859
GO:0033013	tetrapyrrole metabolic process	117	0	1.87	0.53966
GO:0043455	regulation of secondary metabolic process	12	0	0.19	0.53974
GO:0044843	cell cycle G1/S phase transition	15	1	0.24	0.53976
GO:0055070	copper ion homeostasis	6	0	0.1	0.54013
GO:0007584	response to nutrient	6	0	0.1	0.54171
GO:0009628	response to abiotic stimulus	760	11	12.16	0.54207
GO:2000377	regulation of reactive oxygen species metabolic process	25	0	0.4	0.5423
GO:1901004	ubiquinone-6 metabolic process	8	0	0.13	0.5426
GO:1901006	ubiquinone-6 biosynthetic process	8	0	0.13	0.5426
GO:0032981	mitochondrial respiratory chain complex I assembly	7	0	0.11	0.54276
GO:0045935	positive regulation of nucleobase-containing compound metabolic process	193	4	3.09	0.54277
GO:0017062	respiratory chain complex III assembly	6	0	0.1	0.54283
GO:0097033	mitochondrial respiratory chain complex III biogenesis	6	0	0.1	0.54283
GO:0034551	mitochondrial respiratory chain complex III assembly	6	0	0.1	0.54283
GO:0031122	cytoplasmic microtubule organization	50	0	0.8	0.54316
GO:0006801	superoxide metabolic process	34	1	0.54	0.5435
GO:0006400	tRNA modification	125	0	2	0.54416
GO:0010167	response to nitrate	7	0	0.11	0.54422
GO:0009744	response to sucrose	22	0	0.35	0.54574
GO:0002833	positive regulation of response to biotic stimulus	7	0	0.11	0.54605
GO:0043902	positive regulation of multi-organism process	7	0	0.11	0.54605
GO:0006074	(1->3)-beta-D-glucan metabolic process	34	1	0.54	0.54626
GO:0006312	mitotic recombination	22	0	0.35	0.5473
GO:0035196	production of miRNAs involved in gene silencing by miRNA	16	0	0.26	0.54734
GO:0006779	porphyrin-containing compound biosynthetic process	67	0	1.07	0.54767
GO:0006012	galactose metabolic process	30	0	0.48	0.54788
GO:0051273	beta-glucan metabolic process	144	7	2.3	0.54812
GO:0032103	positive regulation of response to external stimulus	9	0	0.14	0.54854
GO:0071702	organic substance transport	1599	24	25.59	0.54859
GO:0006766	vitamin metabolic process	77	0	1.23	0.54902
GO:0000724	double-strand break repair via homologous recombination	70	1	1.12	0.54979
GO:0000725	recombinational repair	70	1	1.12	0.54979
GO:0048869	cellular developmental process	428	7	6.85	0.55028
GO:0018105	peptidyl-serine phosphorylation	165	2	2.64	0.55034
GO:0010389	regulation of G2/M transition of mitotic cell cycle	10	0	0.16	0.55131
GO:0000086	G2/M transition of mitotic cell cycle	10	0	0.16	0.55131
GO:1902749	regulation of cell cycle G2/M phase transition	10	0	0.16	0.55131
GO:0044839	cell cycle G2/M phase transition	10	0	0.16	0.55131
GO:0016441	posttranscriptional gene silencing	59	2	0.94	0.55133
GO:0046486	glycerolipid metabolic process	223	1	3.57	0.55218
GO:0000902	cell morphogenesis	206	4	3.3	0.55282
GO:0033365	protein localization to organelle	373	2	5.97	0.55335
GO:0071478	cellular response to radiation	56	0	0.9	0.55346
GO:0009147	pyrimidine nucleoside triphosphate metabolic process	36	3	0.58	0.55361
GO:0007165	signal transduction	1594	27	25.51	0.55424
GO:0071482	cellular response to light stimulus	48	0	0.77	0.55427
GO:0070647	protein modification by small protein conjugation or removal	753	5	12.05	0.55432
GO:0043562	cellular response to nitrogen levels	28	0	0.45	0.55488
GO:1902645	tertiary alcohol biosynthetic process	13	0	0.21	0.55519
GO:0071902	positive regulation of protein serine/threonine kinase activity	16	0	0.26	0.55545
GO:0007264	small GTPase mediated signal transduction	241	1	3.86	0.55569
GO:1901990	regulation of mitotic cell cycle phase transition	43	2	0.69	0.55753
GO:1901987	regulation of cell cycle phase transition	43	2	0.69	0.55753
GO:0016070	RNA metabolic process	4037	70	64.6	0.55851
GO:0090567	reproductive shoot system development	215	10	3.44	0.55858
GO:0043132	NAD transport	9	0	0.14	0.55972
GO:0006633	fatty acid biosynthetic process	269	1	4.3	0.55986
GO:0006474	N-terminal protein amino acid acetylation	52	0	0.83	0.56073
GO:0030705	cytoskeleton-dependent intracellular transport	6	0	0.1	0.56094
GO:0032501	multicellular organismal process	1475	27	23.6	0.56132
GO:0031119	tRNA pseudouridine synthesis	7	0	0.11	0.562
GO:0009644	response to high light intensity	18	0	0.29	0.56214
GO:1901992	positive regulation of mitotic cell cycle phase transition	8	0	0.13	0.56265
GO:1901989	positive regulation of cell cycle phase transition	8	0	0.13	0.56265
GO:0046499	S-adenosylmethioninamine metabolic process	10	0	0.16	0.56272
GO:0008215	spermine metabolic process	10	0	0.16	0.56272
GO:0006597	spermine biosynthetic process	10	0	0.16	0.56272
GO:0006557	S-adenosylmethioninamine biosynthetic process	10	0	0.16	0.56272
GO:0010214	seed coat development	11	0	0.18	0.56314
GO:0051049	regulation of transport	95	0	1.52	0.56322
GO:0008272	sulfate transport	35	1	0.56	0.56378
GO:0046112	nucleobase biosynthetic process	47	0	0.75	0.56417
GO:0042219	cellular modified amino acid catabolic process	8	0	0.13	0.56442
GO:0008104	protein localization	920	7	14.72	0.56595
GO:0009556	microsporogenesis	8	0	0.13	0.566
GO:0043414	macromolecule methylation	237	3	3.79	0.56626
GO:0031440	regulation of mRNA 3'-end processing	6	0	0.1	0.56627
GO:0044088	regulation of vacuole organization	7	0	0.11	0.56681
GO:0006999	nuclear pore organization	23	0	0.37	0.56695
GO:0090502	RNA phosphodiester bond hydrolysis, endonucleolytic	101	3	1.62	0.56717
GO:0008064	regulation of actin polymerization or depolymerization	33	1	0.53	0.56819
GO:0030832	regulation of actin filament length	33	1	0.53	0.56819
GO:0030833	regulation of actin filament polymerization	33	1	0.53	0.56819
GO:0032271	regulation of protein polymerization	33	1	0.53	0.56819
GO:0030041	actin filament polymerization	33	1	0.53	0.56819
GO:0031399	regulation of protein modification process	144	5	2.3	0.56867
GO:0045324	late endosome to vacuole transport	15	0	0.24	0.56898
GO:0044275	cellular carbohydrate catabolic process	112	6	1.79	0.56964
GO:0051238	sequestering of metal ion	30	0	0.48	0.56994
GO:0009943	adaxial/abaxial axis specification	13	0	0.21	0.57023
GO:0006401	RNA catabolic process	133	3	2.13	0.57058
GO:0044272	sulfur compound biosynthetic process	200	0	3.2	0.57122
GO:0009566	fertilization	16	0	0.26	0.57139
GO:0009423	chorismate biosynthetic process	18	0	0.29	0.57158
GO:0006563	L-serine metabolic process	51	0	0.82	0.57166
GO:0019725	cellular homeostasis	519	11	8.31	0.57219
GO:0016574	histone ubiquitination	12	0	0.19	0.57306
GO:0048235	pollen sperm cell differentiation	10	0	0.16	0.57404
GO:0007062	sister chromatid cohesion	28	0	0.45	0.57431
GO:0071695	anatomical structure maturation	29	0	0.46	0.57511
GO:0009835	fruit ripening	29	0	0.46	0.57511
GO:0006518	peptide metabolic process	151	3	2.42	0.5752
GO:0015819	lysine transport	11	0	0.18	0.57524
GO:1902022	L-lysine transport	11	0	0.18	0.57524
GO:1903401	L-lysine transmembrane transport	11	0	0.18	0.57524
GO:0006493	protein O-linked glycosylation	9	0	0.14	0.57544
GO:0051603	proteolysis involved in cellular protein catabolic process	767	7	12.27	0.5761
GO:0055081	anion homeostasis	14	0	0.22	0.5768
GO:0009827	plant-type cell wall modification	8	0	0.13	0.57689
GO:0043967	histone H4 acetylation	7	0	0.11	0.57709
GO:0044802	single-organism membrane organization	323	2	5.17	0.57746
GO:0003006	developmental process involved in reproduction	622	15	9.95	0.5783
GO:0009067	aspartate family amino acid biosynthetic process	103	1	1.65	0.57833
GO:0010029	regulation of seed germination	31	0	0.5	0.57839
GO:0007034	vacuolar transport	81	0	1.3	0.57903
GO:0023052	signaling	1603	27	25.65	0.57935
GO:0044700	single organism signaling	1603	27	25.65	0.57935
GO:0005996	monosaccharide metabolic process	369	6	5.91	0.57965
GO:0055069	zinc ion homeostasis	19	0	0.3	0.58024
GO:1901421	positive regulation of response to alcohol	16	0	0.26	0.58035
GO:0000271	polysaccharide biosynthetic process	243	4	3.89	0.58091
GO:0051704	multi-organism process	499	9	7.99	0.58159
GO:0009657	plastid organization	216	3	3.46	0.58215
GO:0010024	phytochromobilin biosynthetic process	6	0	0.1	0.58378
GO:0051202	phytochromobilin metabolic process	6	0	0.1	0.58378
GO:0006366	transcription from RNA polymerase II promoter	378	4	6.05	0.5838
GO:0009057	macromolecule catabolic process	1408	30	22.53	0.58412
GO:0033567	DNA replication, Okazaki fragment processing	9	1	0.14	0.58413
GO:0009825	multidimensional cell growth	41	0	0.66	0.58485
GO:0042026	protein refolding	19	1	0.3	0.58578
GO:0031053	primary miRNA processing	9	0	0.14	0.5859
GO:1990267	response to transition metal nanoparticle	19	0	0.3	0.58623
GO:0009955	adaxial/abaxial pattern specification	16	0	0.26	0.5863
GO:0010090	trichome morphogenesis	33	0	0.53	0.58666
GO:0009901	anther dehiscence	10	0	0.16	0.58759
GO:0006071	glycerol metabolic process	12	0	0.19	0.58795
GO:0019400	alditol metabolic process	12	0	0.19	0.58795
GO:0006534	cysteine metabolic process	31	0	0.5	0.58802
GO:0006367	transcription initiation from RNA polymerase II promoter	76	0	1.22	0.58807
GO:0006720	isoprenoid metabolic process	244	2	3.9	0.58823
GO:0000727	double-strand break repair via break-induced replication	9	0	0.14	0.58837
GO:0044265	cellular macromolecule catabolic process	928	10	14.85	0.58867
GO:0009404	toxin metabolic process	48	2	0.77	0.58889
GO:0006096	glycolytic process	123	4	1.97	0.58926
GO:0048518	positive regulation of biological process	529	9	8.47	0.58949
GO:1901293	nucleoside phosphate biosynthetic process	461	4	7.38	0.58999
GO:0033993	response to lipid	422	5	6.75	0.59003
GO:0061615	glycolytic process through fructose-6-phosphate	24	2	0.38	0.59018
GO:0010212	response to ionizing radiation	31	0	0.5	0.59087
GO:0030488	tRNA methylation	38	0	0.61	0.59125
GO:0070084	protein initiator methionine removal	8	0	0.13	0.59247
GO:0061025	membrane fusion	172	2	2.75	0.59255
GO:0010118	stomatal movement	45	0	0.72	0.59321
GO:0000154	rRNA modification	48	1	0.77	0.59337
GO:1901575	organic substance catabolic process	2154	42	34.47	0.59353
GO:0044707	single-multicellular organism process	1439	27	23.03	0.59356
GO:0061024	membrane organization	362	2	5.79	0.59385
GO:0016051	carbohydrate biosynthetic process	352	4	5.63	0.59419
GO:0006414	translational elongation	151	1	2.42	0.59449
GO:0048015	phosphatidylinositol-mediated signaling	6	0	0.1	0.59575
GO:0048017	inositol lipid-mediated signaling	6	0	0.1	0.59575
GO:0006751	glutathione catabolic process	6	0	0.1	0.59609
GO:0030244	cellulose biosynthetic process	73	1	1.17	0.59647
GO:0009056	catabolic process	2447	52	39.16	0.59678
GO:0001887	selenium compound metabolic process	10	0	0.16	0.59725
GO:0006995	cellular response to nitrogen starvation	16	0	0.26	0.59738
GO:0016575	histone deacetylation	23	0	0.37	0.59765
GO:0031365	N-terminal protein amino acid modification	67	0	1.07	0.59785
GO:0031125	rRNA 3'-end processing	22	0	0.35	0.59846
GO:0055046	microgametogenesis	15	0	0.24	0.59858
GO:0006778	porphyrin-containing compound metabolic process	107	0	1.71	0.59909
GO:0045333	cellular respiration	337	0	5.39	0.59934
GO:0018202	peptidyl-histidine modification	31	0	0.5	0.5996
GO:0048513	organ development	475	9	7.6	0.59965
GO:0048466	androecium development	38	2	0.61	0.59991
GO:0048443	stamen development	38	2	0.61	0.59991
GO:0030968	endoplasmic reticulum unfolded protein response	8	0	0.13	0.6006
GO:0009850	auxin metabolic process	21	0	0.34	0.60111
GO:0010187	negative regulation of seed germination	13	0	0.21	0.60158
GO:0018958	phenol-containing compound metabolic process	14	0	0.22	0.60174
GO:0044260	cellular macromolecule metabolic process	10801	175	172.85	0.60192
GO:0007568	aging	67	0	1.07	0.60237
GO:2000021	regulation of ion homeostasis	18	0	0.29	0.60296
GO:0010043	response to zinc ion	18	0	0.29	0.60296
GO:0006576	cellular biogenic amine metabolic process	124	4	1.98	0.60315
GO:0097305	response to alcohol	388	4	6.21	0.60349
GO:0048522	positive regulation of cellular process	448	8	7.17	0.60438
GO:0009629	response to gravity	37	2	0.59	0.60527
GO:0009851	auxin biosynthetic process	14	0	0.22	0.60537
GO:0045037	protein import into chloroplast stroma	13	0	0.21	0.60572
GO:0097503	sialylation	7	0	0.11	0.60609
GO:0007276	gamete generation	18	0	0.29	0.60625
GO:0048232	male gamete generation	18	0	0.29	0.60625
GO:0048523	negative regulation of cellular process	372	7	5.95	0.60664
GO:0072503	cellular divalent inorganic cation homeostasis	26	0	0.42	0.60722
GO:0007091	metaphase/anaphase transition of mitotic cell cycle	24	2	0.38	0.60723
GO:0030071	regulation of mitotic metaphase/anaphase transition	24	2	0.38	0.60723
GO:0044784	metaphase/anaphase transition of cell cycle	24	2	0.38	0.60723
GO:1902099	regulation of metaphase/anaphase transition of cell cycle	24	2	0.38	0.60723
GO:0034637	cellular carbohydrate biosynthetic process	233	4	3.73	0.6073
GO:0009687	abscisic acid metabolic process	12	1	0.19	0.60746
GO:0006528	asparagine metabolic process	27	1	0.43	0.60761
GO:0006529	asparagine biosynthetic process	27	1	0.43	0.60761
GO:0015996	chlorophyll catabolic process	22	0	0.35	0.60796
GO:0046149	pigment catabolic process	22	0	0.35	0.60796
GO:0005985	sucrose metabolic process	29	3	0.46	0.608
GO:0032210	regulation of telomere maintenance via telomerase	6	0	0.1	0.60852
GO:0097576	vacuole fusion	11	0	0.18	0.60877
GO:0071214	cellular response to abiotic stimulus	66	0	1.06	0.60884
GO:0006011	UDP-glucose metabolic process	6	0	0.1	0.60921
GO:0071241	cellular response to inorganic substance	19	0	0.3	0.6094
GO:0009723	response to ethylene	125	2	2	0.61118
GO:0035268	protein mannosylation	8	0	0.13	0.6119
GO:0035269	protein O-linked mannosylation	8	0	0.13	0.6119
GO:0006399	tRNA metabolic process	308	0	4.93	0.61236
GO:0009651	response to salt stress	137	0	2.19	0.61245
GO:0051240	positive regulation of multicellular organismal process	35	1	0.56	0.61278
GO:0048440	carpel development	35	0	0.56	0.61299
GO:0061077	chaperone-mediated protein folding	54	0	0.86	0.61299
GO:0032446	protein modification by small protein conjugation	653	5	10.45	0.61352
GO:0042157	lipoprotein metabolic process	74	2	1.18	0.61392
GO:0018209	peptidyl-serine modification	168	2	2.69	0.61414
GO:0051260	protein homooligomerization	16	0	0.26	0.61438
GO:0006086	acetyl-CoA biosynthetic process from pyruvate	9	0	0.14	0.61481
GO:0009084	glutamine family amino acid biosynthetic process	55	1	0.88	0.61538
GO:0009266	response to temperature stimulus	160	4	2.56	0.6156
GO:0006168	adenine salvage	6	0	0.1	0.61571
GO:0010104	regulation of ethylene-activated signaling pathway	50	2	0.8	0.617
GO:0070297	regulation of phosphorelay signal transduction system	50	2	0.8	0.617
GO:0010035	response to inorganic substance	434	9	6.95	0.61787
GO:0006986	response to unfolded protein	18	0	0.29	0.61836
GO:0019585	glucuronate metabolic process	190	3	3.04	0.619
GO:0052695	cellular glucuronidation	190	3	3.04	0.619
GO:0052696	flavonoid glucuronidation	190	3	3.04	0.619
GO:0006063	uronic acid metabolic process	190	3	3.04	0.619
GO:0032504	multicellular organism reproduction	74	0	1.18	0.61918
GO:0006997	nucleus organization	63	2	1.01	0.61939
GO:0051029	rRNA transport	10	0	0.16	0.61962
GO:0006407	rRNA export from nucleus	10	0	0.16	0.61962
GO:0006109	regulation of carbohydrate metabolic process	11	0	0.18	0.62008
GO:0048731	system development	932	20	14.91	0.62096
GO:0051650	establishment of vesicle localization	12	0	0.19	0.62109
GO:0051648	vesicle localization	12	0	0.19	0.62109
GO:0001932	regulation of protein phosphorylation	103	5	1.65	0.62126
GO:0016101	diterpenoid metabolic process	47	0	0.75	0.62141
GO:0019860	uracil metabolic process	8	0	0.13	0.62151
GO:0006812	cation transport	1079	8	17.27	0.62204
GO:0033043	regulation of organelle organization	170	3	2.72	0.6224
GO:0000266	mitochondrial fission	8	0	0.13	0.62374
GO:0072506	trivalent inorganic anion homeostasis	12	0	0.19	0.62399
GO:0055062	phosphate ion homeostasis	12	0	0.19	0.62399
GO:0035601	protein deacylation	39	2	0.62	0.62418
GO:0010190	cytochrome b6f complex assembly	14	0	0.22	0.62421
GO:0042762	regulation of sulfur metabolic process	15	0	0.24	0.62451
GO:0009926	auxin polar transport	48	4	0.77	0.62463
GO:0042981	regulation of apoptotic process	9	0	0.14	0.62481
GO:0051254	positive regulation of RNA metabolic process	186	4	2.98	0.6252
GO:0071033	nuclear retention of pre-mRNA at the site of transcription	7	0	0.11	0.62556
GO:0008298	intracellular mRNA localization	7	0	0.11	0.62556
GO:0052325	cell wall pectin biosynthetic process	8	0	0.13	0.62559
GO:0010052	guard cell differentiation	17	0	0.27	0.62677
GO:0016233	telomere capping	9	0	0.14	0.62704
GO:0060260	regulation of transcription initiation from RNA polymerase II promoter	38	0	0.61	0.62738
GO:2000142	regulation of DNA-templated transcription, initiation	38	0	0.61	0.62738
GO:0035556	intracellular signal transduction	799	10	12.79	0.62766
GO:0019344	cysteine biosynthetic process	22	0	0.35	0.628
GO:0031400	negative regulation of protein modification process	27	0	0.43	0.62825
GO:0016458	gene silencing	137	4	2.19	0.6294
GO:0000466	maturation of 5.8S rRNA from tricistronic rRNA transcript (SSU-rRNA, 5.8S rRNA, LSU-rRNA)	30	0	0.48	0.62994
GO:0043687	post-translational protein modification	8	0	0.13	0.63009
GO:0007275	multicellular organismal development	1341	26	21.46	0.63111
GO:0033353	S-adenosylmethionine cycle	10	0	0.16	0.6313
GO:0048856	anatomical structure development	1266	30	20.26	0.63162
GO:0005983	starch catabolic process	10	0	0.16	0.63213
GO:0009958	positive gravitropism	15	2	0.24	0.63315
GO:0051246	regulation of protein metabolic process	439	11	7.03	0.63328
GO:0008156	negative regulation of DNA replication	12	0	0.19	0.63535
GO:0031577	spindle checkpoint	14	1	0.22	0.63564
GO:1902100	negative regulation of metaphase/anaphase transition of cell cycle	14	1	0.22	0.63564
GO:0007094	mitotic spindle assembly checkpoint	14	1	0.22	0.63564
GO:0045841	negative regulation of mitotic metaphase/anaphase transition	14	1	0.22	0.63564
GO:0045839	negative regulation of mitosis	14	1	0.22	0.63564
GO:0071173	spindle assembly checkpoint	14	1	0.22	0.63564
GO:0071174	mitotic spindle checkpoint	14	1	0.22	0.63564
GO:0051784	negative regulation of nuclear division	14	1	0.22	0.63564
GO:0042592	homeostatic process	730	12	11.68	0.63661
GO:0061088	regulation of sequestering of zinc ion	16	0	0.26	0.63784
GO:0032119	sequestering of zinc ion	16	0	0.26	0.63784
GO:0006882	cellular zinc ion homeostasis	16	0	0.26	0.63784
GO:0045851	pH reduction	27	0	0.43	0.63947
GO:0007035	vacuolar acidification	27	0	0.43	0.63947
GO:0051452	intracellular pH reduction	27	0	0.43	0.63947
GO:0006397	mRNA processing	419	1	6.71	0.63966
GO:0017182	peptidyl-diphthamide metabolic process	7	0	0.11	0.6401
GO:0017183	peptidyl-diphthamide biosynthetic process from peptidyl-histidine	7	0	0.11	0.6401
GO:0009967	positive regulation of signal transduction	32	0	0.51	0.64029
GO:0023056	positive regulation of signaling	32	0	0.51	0.64029
GO:0033692	cellular polysaccharide biosynthetic process	191	4	3.06	0.64044
GO:0090305	nucleic acid phosphodiester bond hydrolysis	309	7	4.94	0.64065
GO:0009605	response to external stimulus	453	9	7.25	0.64107
GO:0006508	proteolysis	1435	25	22.96	0.64144
GO:0006338	chromatin remodeling	56	0	0.9	0.64201
GO:0009311	oligosaccharide metabolic process	105	3	1.68	0.64239
GO:0042256	mature ribosome assembly	11	0	0.18	0.6424
GO:0042445	hormone metabolic process	129	1	2.06	0.64322
GO:0009846	pollen germination	23	0	0.37	0.64323
GO:0010207	photosystem II assembly	23	0	0.37	0.64487
GO:0009581	detection of external stimulus	26	0	0.42	0.64495
GO:0009582	detection of abiotic stimulus	26	0	0.42	0.64495
GO:2000028	regulation of photoperiodism, flowering	16	0	0.26	0.64538
GO:0097035	regulation of membrane lipid distribution	31	0	0.5	0.646
GO:0034204	lipid translocation	31	0	0.5	0.646
GO:0045332	phospholipid translocation	31	0	0.5	0.646
GO:0005984	disaccharide metabolic process	71	3	1.14	0.64659
GO:0015713	phosphoglycerate transport	7	0	0.11	0.64671
GO:0032844	regulation of homeostatic process	26	0	0.42	0.64717
GO:0000301	retrograde transport, vesicle recycling within Golgi	16	0	0.26	0.64772
GO:0031167	rRNA methylation	34	0	0.54	0.64821
GO:0048564	photosystem I assembly	14	0	0.22	0.64832
GO:0009735	response to cytokinin	113	3	1.81	0.649
GO:0016102	diterpenoid biosynthetic process	33	0	0.53	0.64992
GO:0080135	regulation of cellular response to stress	28	0	0.45	0.65055
GO:0045039	protein import into mitochondrial inner membrane	6	0	0.1	0.65086
GO:2000280	regulation of root development	20	0	0.32	0.6514
GO:0045492	xylan biosynthetic process	30	1	0.48	0.65175
GO:0071369	cellular response to ethylene stimulus	68	2	1.09	0.65325
GO:0009873	ethylene-activated signaling pathway	68	2	1.09	0.65325
GO:1901419	regulation of response to alcohol	51	0	0.82	0.65378
GO:0042343	indole glucosinolate metabolic process	11	0	0.18	0.65581
GO:0006144	purine nucleobase metabolic process	42	0	0.67	0.65655
GO:0006664	glycolipid metabolic process	79	0	1.26	0.65747
GO:0051726	regulation of cell cycle	136	6	2.18	0.65751
GO:0009892	negative regulation of metabolic process	282	5	4.51	0.65766
GO:0010038	response to metal ion	73	0	1.17	0.65767
GO:0043574	peroxisomal transport	28	0	0.45	0.65784
GO:0072662	protein localization to peroxisome	28	0	0.45	0.65784
GO:0072663	establishment of protein localization to peroxisome	28	0	0.45	0.65784
GO:0006625	protein targeting to peroxisome	28	0	0.45	0.65784
GO:0016024	CDP-diacylglycerol biosynthetic process	8	0	0.13	0.65936
GO:0046341	CDP-diacylglycerol metabolic process	8	0	0.13	0.65936
GO:0043632	modification-dependent macromolecule catabolic process	625	4	10	0.65938
GO:0046349	amino sugar biosynthetic process	10	0	0.16	0.6598
GO:0006282	regulation of DNA repair	11	0	0.18	0.65995
GO:0009642	response to light intensity	48	0	0.77	0.66021
GO:0009635	response to herbicide	14	0	0.22	0.66149
GO:0080147	root hair cell development	18	0	0.29	0.66168
GO:0010150	leaf senescence	28	0	0.45	0.6624
GO:0000972	transcription-dependent tethering of RNA polymerase II gene DNA at nuclear periphery	8	0	0.13	0.66286
GO:0048653	anther development	28	0	0.45	0.66328
GO:0009411	response to UV	36	2	0.58	0.66366
GO:0006090	pyruvate metabolic process	150	4	2.4	0.66416
GO:0034660	ncRNA metabolic process	668	3	10.69	0.66459
GO:0043408	regulation of MAPK cascade	31	1	0.5	0.66497
GO:0016098	monoterpenoid metabolic process	7	0	0.11	0.66532
GO:0016099	monoterpenoid biosynthetic process	7	0	0.11	0.66532
GO:0006207	'de novo' pyrimidine nucleobase biosynthetic process	19	0	0.3	0.66544
GO:0006476	protein deacetylation	25	0	0.4	0.66621
GO:0043254	regulation of protein complex assembly	84	1	1.34	0.66625
GO:0031347	regulation of defense response	103	0	1.65	0.66664
GO:0006075	(1->3)-beta-D-glucan biosynthetic process	27	0	0.43	0.66665
GO:1900673	olefin metabolic process	40	1	0.64	0.66677
GO:1900674	olefin biosynthetic process	40	1	0.64	0.66677
GO:0043450	alkene biosynthetic process	40	1	0.64	0.66677
GO:0009692	ethylene metabolic process	40	1	0.64	0.66677
GO:0009693	ethylene biosynthetic process	40	1	0.64	0.66677
GO:0043449	cellular alkene metabolic process	40	1	0.64	0.66677
GO:0048468	cell development	106	0	1.7	0.66816
GO:0000373	Group II intron splicing	21	0	0.34	0.66823
GO:0072595	maintenance of protein localization in organelle	17	0	0.27	0.66899
GO:0010016	shoot system morphogenesis	108	1	1.73	0.669
GO:0048588	developmental cell growth	43	0	0.69	0.66901
GO:0048582	positive regulation of post-embryonic development	32	1	0.51	0.66954
GO:0016180	snRNA processing	16	0	0.26	0.67114
GO:0071396	cellular response to lipid	284	2	4.54	0.67151
GO:0016093	polyprenol metabolic process	12	0	0.19	0.67164
GO:0019348	dolichol metabolic process	12	0	0.19	0.67164
GO:0015977	carbon fixation	54	0	0.86	0.6717
GO:0061458	reproductive system development	558	14	8.93	0.67196
GO:0048608	reproductive structure development	558	14	8.93	0.67196
GO:0045859	regulation of protein kinase activity	100	5	1.6	0.6722
GO:0007154	cell communication	1750	30	28	0.67241
GO:0009887	organ morphogenesis	101	2	1.62	0.67278
GO:0070681	glutaminyl-tRNAGln biosynthesis via transamidation	6	0	0.1	0.67313
GO:0006952	defense response	682	13	10.91	0.67315
GO:0016050	vesicle organization	197	2	3.15	0.67324
GO:0032535	regulation of cellular component size	52	3	0.83	0.67336
GO:0090066	regulation of anatomical structure size	52	3	0.83	0.67336
GO:0071322	cellular response to carbohydrate stimulus	14	0	0.22	0.67341
GO:0007602	phototransduction	18	0	0.29	0.67419
GO:0009585	red, far-red light phototransduction	18	0	0.29	0.67419
GO:0006879	cellular iron ion homeostasis	29	0	0.46	0.67468
GO:0035246	peptidyl-arginine N-methylation	12	0	0.19	0.67523
GO:0035247	peptidyl-arginine omega-N-methylation	12	0	0.19	0.67523
GO:0034969	histone arginine methylation	12	0	0.19	0.67523
GO:0009407	toxin catabolic process	44	2	0.7	0.6762
GO:0090487	secondary metabolite catabolic process	44	2	0.7	0.6762
GO:0098732	macromolecule deacylation	41	2	0.66	0.67698
GO:0031123	RNA 3'-end processing	62	0	0.99	0.67828
GO:0045926	negative regulation of growth	14	0	0.22	0.67859
GO:0008610	lipid biosynthetic process	707	6	11.31	0.67899
GO:0032957	inositol trisphosphate metabolic process	18	0	0.29	0.67906
GO:0006783	heme biosynthetic process	36	0	0.58	0.67981
GO:0009790	embryo development	204	5	3.26	0.6801
GO:0022603	regulation of anatomical structure morphogenesis	91	1	1.46	0.68044
GO:0032270	positive regulation of cellular protein metabolic process	203	4	3.25	0.68052
GO:0010449	root meristem growth	13	0	0.21	0.68064
GO:0045005	DNA-dependent DNA replication maintenance of fidelity	8	0	0.13	0.68162
GO:0006915	apoptotic process	27	0	0.43	0.68223
GO:0000075	cell cycle checkpoint	25	1	0.4	0.68361
GO:0051130	positive regulation of cellular component organization	98	0	1.57	0.68393
GO:0009914	hormone transport	52	4	0.83	0.6844
GO:0060918	auxin transport	52	4	0.83	0.6844
GO:0006561	proline biosynthetic process	17	0	0.27	0.68508
GO:0042304	regulation of fatty acid biosynthetic process	13	0	0.21	0.68513
GO:0002097	tRNA wobble base modification	21	0	0.34	0.68519
GO:0002098	tRNA wobble uridine modification	21	0	0.34	0.68519
GO:0048438	floral whorl development	73	2	1.17	0.68654
GO:0055074	calcium ion homeostasis	18	0	0.29	0.68709
GO:0010647	positive regulation of cell communication	34	0	0.54	0.68723
GO:0043647	inositol phosphate metabolic process	29	0	0.46	0.68862
GO:0006081	cellular aldehyde metabolic process	62	0	0.99	0.68972
GO:0032989	cellular component morphogenesis	244	4	3.9	0.68983
GO:2001020	regulation of response to DNA damage stimulus	13	0	0.21	0.69068
GO:0031348	negative regulation of defense response	20	0	0.32	0.69129
GO:0010927	cellular component assembly involved in morphogenesis	38	0	0.61	0.69174
GO:0010208	pollen wall assembly	38	0	0.61	0.69174
GO:0051247	positive regulation of protein metabolic process	205	4	3.28	0.69192
GO:0044255	cellular lipid metabolic process	919	5	14.71	0.69219
GO:0010564	regulation of cell cycle process	88	4	1.41	0.69243
GO:0000288	nuclear-transcribed mRNA catabolic process, deadenylation-dependent decay	47	1	0.75	0.6927
GO:0009860	pollen tube growth	28	0	0.45	0.69271
GO:0035670	plant-type ovary development	24	0	0.38	0.6947
GO:0048481	ovule development	24	0	0.38	0.6947
GO:0006479	protein methylation	115	1	1.84	0.69499
GO:0008213	protein alkylation	115	1	1.84	0.69499
GO:0030259	lipid glycosylation	11	0	0.18	0.69515
GO:0044774	mitotic DNA integrity checkpoint	8	0	0.13	0.69547
GO:0072348	sulfur compound transport	50	1	0.8	0.6957
GO:0019856	pyrimidine nucleobase biosynthetic process	23	0	0.37	0.69572
GO:0051084	'de novo' posttranslational protein folding	11	0	0.18	0.69581
GO:0051085	chaperone mediated protein folding requiring cofactor	11	0	0.18	0.69581
GO:0006458	'de novo' protein folding	11	0	0.18	0.69581
GO:0045787	positive regulation of cell cycle	18	0	0.29	0.69611
GO:0034508	centromere complex assembly	6	0	0.1	0.69632
GO:0018393	internal peptidyl-lysine acetylation	65	0	1.04	0.69665
[truncated: 2,565 more rows]

## Sheet: brown
Supplementary Table 8. GO analysis of DEGs of modules.
BP
GO.ID	Term	Annotated	Significant	Expected	KS
GO:0009765	photosynthesis, light harvesting	112	1	0.58	0.00011
GO:1902600	hydrogen ion transmembrane transport	442	4	2.31	0.0003
GO:0017157	regulation of exocytosis	10	0	0.05	0.00119
GO:0006457	protein folding	404	5	2.11	0.00131
GO:0098656	anion transmembrane transport	269	5	1.4	0.00336
GO:0051307	meiotic chromosome separation	16	0	0.08	0.00504
GO:0046274	lignin catabolic process	49	0	0.26	0.00519
GO:0009626	plant-type hypersensitive response	37	2	0.19	0.00527
GO:0006865	amino acid transport	145	3	0.76	0.00575
GO:0043622	cortical microtubule organization	6	0	0.03	0.00655
GO:0000911	cytokinesis by cell plate formation	44	0	0.23	0.00659
GO:0009115	xanthine catabolic process	9	0	0.05	0.00766
GO:0030433	ER-associated ubiquitin-dependent protein catabolic process	55	0	0.29	0.00771
GO:0006165	nucleoside diphosphate phosphorylation	13	0	0.07	0.00799
GO:0006183	GTP biosynthetic process	13	0	0.07	0.00799
GO:0006228	UTP biosynthetic process	13	0	0.07	0.00799
GO:0046034	ATP metabolic process	455	2	2.37	0.00884
GO:0044267	cellular protein metabolic process	6165	23	32.18	0.0089
GO:0010603	regulation of cytoplasmic mRNA processing body assembly	10	0	0.05	0.00895
GO:0010051	xylem and phloem pattern formation	35	0	0.18	0.00908
GO:0009870	defense response signaling pathway, resistance gene-dependent	13	0	0.07	0.0096
GO:0042451	purine nucleoside biosynthetic process	325	2	1.7	0.01051
GO:0046129	purine ribonucleoside biosynthetic process	325	2	1.7	0.01051
GO:0008356	asymmetric cell division	11	0	0.06	0.01154
GO:0044765	single-organism transport	3351	23	17.49	0.01279
GO:0006732	coenzyme metabolic process	332	0	1.73	0.01305
GO:0009308	amine metabolic process	195	0	1.02	0.01307
GO:0006740	NADPH regeneration	49	0	0.26	0.01381
GO:0006098	pentose-phosphate shunt	49	0	0.26	0.01381
GO:0006303	double-strand break repair via nonhomologous end joining	14	1	0.07	0.01578
GO:0000726	non-recombinational repair	14	1	0.07	0.01578
GO:0009052	pentose-phosphate shunt, non-oxidative branch	16	0	0.08	0.0161
GO:0055085	transmembrane transport	2027	16	10.58	0.01647
GO:0006835	dicarboxylic acid transport	47	0	0.25	0.01654
GO:0010305	leaf vascular tissue pattern formation	18	0	0.09	0.0172
GO:0030150	protein import into mitochondrial matrix	40	2	0.21	0.01724
GO:0042775	mitochondrial ATP synthesis coupled electron transport	53	0	0.28	0.01828
GO:0032958	inositol phosphate biosynthetic process	6	0	0.03	0.0183
GO:0006730	one-carbon metabolic process	72	0	0.38	0.01882
GO:0051179	localization	4508	29	23.53	0.01902
GO:0006164	purine nucleotide biosynthetic process	327	2	1.71	0.01906
GO:0072522	purine-containing compound biosynthetic process	372	2	1.94	0.0196
GO:0006556	S-adenosylmethionine biosynthetic process	18	0	0.09	0.01986
GO:0015740	C4-dicarboxylate transport	29	0	0.15	0.02012
GO:0015807	L-amino acid transport	31	1	0.16	0.02033
GO:0010332	response to gamma radiation	10	1	0.05	0.02193
GO:0015743	malate transport	27	0	0.14	0.02198
GO:0009100	glycoprotein metabolic process	155	0	0.81	0.02198
GO:0009101	glycoprotein biosynthetic process	155	0	0.81	0.02198
GO:0010496	intercellular transport	21	0	0.11	0.02214
GO:0009902	chloroplast relocation	30	0	0.16	0.02258
GO:0051667	establishment of plastid localization	30	0	0.16	0.02258
GO:0051644	plastid localization	30	0	0.16	0.02258
GO:0015698	inorganic anion transport	147	5	0.77	0.02307
GO:0006887	exocytosis	173	0	0.9	0.02367
GO:0003333	amino acid transmembrane transport	130	3	0.68	0.02402
GO:0009152	purine ribonucleotide biosynthetic process	325	2	1.7	0.02409
GO:0051640	organelle localization	61	0	0.32	0.02488
GO:0071051	polyadenylation-dependent snoRNA 3'-end processing	9	1	0.05	0.02544
GO:0016074	snoRNA metabolic process	9	1	0.05	0.02544
GO:0031126	snoRNA 3'-end processing	9	1	0.05	0.02544
GO:0043144	snoRNA processing	9	1	0.05	0.02544
GO:0070085	glycosylation	170	0	0.89	0.0255
GO:0046836	glycolipid transport	9	0	0.05	0.026
GO:1901137	carbohydrate derivative biosynthetic process	687	2	3.59	0.02633
GO:0006591	ornithine metabolic process	18	0	0.09	0.0268
GO:0009631	cold acclimation	15	0	0.08	0.02704
GO:0006810	transport	4354	28	22.72	0.02772
GO:0000712	resolution of meiotic recombination intermediates	12	0	0.06	0.02814
GO:0030010	establishment of cell polarity	7	0	0.04	0.02894
GO:0007163	establishment or maintenance of cell polarity	7	0	0.04	0.02894
GO:0098661	inorganic anion transmembrane transport	58	2	0.3	0.02941
GO:0030091	protein repair	36	0	0.19	0.02978
GO:0006739	NADP metabolic process	53	0	0.28	0.03023
GO:0009617	response to bacterium	109	3	0.57	0.03074
GO:0009168	purine ribonucleoside monophosphate biosynthetic process	278	2	1.45	0.03099
GO:0009127	purine nucleoside monophosphate biosynthetic process	278	2	1.45	0.03099
GO:0009637	response to blue light	17	0	0.09	0.0313
GO:0009082	branched-chain amino acid biosynthetic process	36	0	0.19	0.03149
GO:0006486	protein glycosylation	147	0	0.77	0.0318
GO:0043413	macromolecule glycosylation	147	0	0.77	0.0318
GO:0017004	cytochrome complex assembly	124	0	0.65	0.03377
GO:0006972	hyperosmotic response	24	0	0.13	0.03393
GO:0032940	secretion by cell	187	0	0.98	0.03444
GO:0008616	queuosine biosynthetic process	15	0	0.08	0.03532
GO:0046116	queuosine metabolic process	15	0	0.08	0.03532
GO:0051234	establishment of localization	4402	28	22.97	0.03552
GO:0006544	glycine metabolic process	37	0	0.19	0.03609
GO:0000710	meiotic mismatch repair	11	0	0.06	0.03609
GO:0010204	defense response signaling pathway, resistance gene-independent	10	0	0.05	0.03622
GO:0010087	phloem or xylem histogenesis	44	1	0.23	0.03688
GO:0006595	polyamine metabolic process	49	0	0.26	0.03739
GO:0000027	ribosomal large subunit assembly	87	0	0.45	0.03837
GO:0046451	diaminopimelate metabolic process	21	0	0.11	0.04107
GO:0009085	lysine biosynthetic process	21	0	0.11	0.04107
GO:0009089	lysine biosynthetic process via diaminopimelate	21	0	0.11	0.04107
GO:0051656	establishment of organelle localization	57	0	0.3	0.04149
GO:0098660	inorganic ion transmembrane transport	747	8	3.9	0.04159
GO:0060249	anatomical structure homeostasis	41	1	0.21	0.04159
GO:0000060	protein import into nucleus, translocation	14	0	0.07	0.04289
GO:0006610	ribosomal protein import into nucleus	14	0	0.07	0.04289
GO:0042989	sequestering of actin monomers	9	0	0.05	0.04324
GO:0033500	carbohydrate homeostasis	14	2	0.07	0.04462
GO:0009124	nucleoside monophosphate biosynthetic process	315	2	1.64	0.04465
GO:0044106	cellular amine metabolic process	138	0	0.72	0.04526
GO:0032200	telomere organization	39	1	0.2	0.04585
GO:0000723	telomere maintenance	39	1	0.2	0.04585
GO:0046500	S-adenosylmethionine metabolic process	31	0	0.16	0.04625
GO:0000469	cleavage involved in rRNA processing	34	1	0.18	0.04626
GO:0010540	basipetal auxin transport	7	0	0.04	0.04701
GO:0007005	mitochondrion organization	201	3	1.05	0.04715
GO:0015985	energy coupled proton transport, down electrochemical gradient	187	2	0.98	0.04897
GO:0015986	ATP synthesis coupled proton transport	187	2	0.98	0.04897
GO:0042147	retrograde transport, endosome to Golgi	31	0	0.16	0.04957
GO:0009309	amine biosynthetic process	77	0	0.4	0.04959
GO:0042401	cellular biogenic amine biosynthetic process	77	0	0.4	0.04959
GO:0016197	endosomal transport	65	0	0.34	0.0502
GO:0010311	lateral root formation	24	0	0.13	0.05057
GO:0006542	glutamine biosynthetic process	9	0	0.05	0.05105
GO:0015672	monovalent inorganic cation transport	718	6	3.75	0.05167
GO:0000304	response to singlet oxygen	10	0	0.05	0.05184
GO:0042455	ribonucleoside biosynthetic process	371	2	1.94	0.05303
GO:0000303	response to superoxide	37	5	0.19	0.05374
GO:0000305	response to oxygen radical	37	5	0.19	0.05374
GO:0010506	regulation of autophagy	12	0	0.06	0.05385
GO:0009768	photosynthesis, light harvesting in photosystem I	42	0	0.22	0.0541
GO:0071423	malate transmembrane transport	18	0	0.09	0.05442
GO:0006893	Golgi to plasma membrane transport	13	0	0.07	0.05451
GO:0018201	peptidyl-glycine modification	9	0	0.05	0.05453
GO:0018008	N-terminal peptidyl-glycine N-myristoylation	9	0	0.05	0.05453
GO:0006842	tricarboxylic acid transport	11	0	0.06	0.05461
GO:0006163	purine nucleotide metabolic process	705	2	3.68	0.05529
GO:0009097	isoleucine biosynthetic process	22	0	0.11	0.05609
GO:0006549	isoleucine metabolic process	22	0	0.11	0.05609
GO:0051181	cofactor transport	79	0	0.41	0.05734
GO:0006607	NLS-bearing protein import into nucleus	30	0	0.16	0.05753
GO:1902475	L-alpha-amino acid transmembrane transport	19	1	0.1	0.05861
GO:0042545	cell wall modification	123	2	0.64	0.05985
GO:0044699	single-organism process	13784	71	71.94	0.06015
GO:0010497	plasmodesmata-mediated intercellular transport	11	0	0.06	0.06016
GO:0006007	glucose catabolic process	53	0	0.28	0.06025
GO:0045490	pectin catabolic process	150	1	0.78	0.06085
GO:0009452	7-methylguanosine RNA capping	15	2	0.08	0.06109
GO:0036260	RNA capping	15	2	0.08	0.06109
GO:0006553	lysine metabolic process	22	0	0.11	0.06131
GO:0009903	chloroplast avoidance movement	19	0	0.1	0.06322
GO:0010039	response to iron ion	20	0	0.1	0.06376
GO:0042742	defense response to bacterium	101	3	0.53	0.06387
GO:0007059	chromosome segregation	87	0	0.45	0.06426
GO:0009163	nucleoside biosynthetic process	374	2	1.95	0.06444
GO:0005978	glycogen biosynthetic process	19	1	0.1	0.06462
GO:0006979	response to oxidative stress	400	6	2.09	0.06583
GO:1901678	iron coordination entity transport	66	0	0.34	0.06598
GO:0015886	heme transport	66	0	0.34	0.06598
GO:0006289	nucleotide-excision repair	45	0	0.23	0.06604
GO:0006108	malate metabolic process	47	0	0.25	0.06726
GO:0009059	macromolecule biosynthetic process	4948	23	25.82	0.06734
GO:0036297	interstrand cross-link repair	7	0	0.04	0.06759
GO:0000272	polysaccharide catabolic process	309	3	1.61	0.06763
GO:0010030	positive regulation of seed germination	6	0	0.03	0.06765
GO:0071450	cellular response to oxygen radical	33	5	0.17	0.06767
GO:0071451	cellular response to superoxide	33	5	0.17	0.06767
GO:0019430	removal of superoxide radicals	33	5	0.17	0.06767
GO:0046903	secretion	191	0	1	0.06917
GO:0000919	cell plate assembly	14	0	0.07	0.0694
GO:0042254	ribosome biogenesis	602	5	3.14	0.06943
GO:0009156	ribonucleoside monophosphate biosynthetic process	304	2	1.59	0.06952
GO:0018298	protein-chromophore linkage	150	1	0.78	0.07031
GO:0042274	ribosomal small subunit biogenesis	191	1	1	0.07041
GO:0072524	pyridine-containing compound metabolic process	94	0	0.49	0.07112
GO:0033609	oxalate metabolic process	38	0	0.2	0.07123
GO:0098662	inorganic cation transmembrane transport	712	7	3.72	0.07169
GO:0031935	regulation of chromatin silencing	13	0	0.07	0.07346
GO:0009167	purine ribonucleoside monophosphate metabolic process	509	2	2.66	0.07556
GO:0009126	purine nucleoside monophosphate metabolic process	509	2	2.66	0.07556
GO:0071897	DNA biosynthetic process	50	0	0.26	0.07648
GO:0042816	vitamin B6 metabolic process	11	0	0.06	0.07728
GO:0042819	vitamin B6 biosynthetic process	11	0	0.06	0.07728
GO:0016117	carotenoid biosynthetic process	41	0	0.21	0.07821
GO:0016109	tetraterpenoid biosynthetic process	41	0	0.21	0.07821
GO:0006801	superoxide metabolic process	34	5	0.18	0.07904
GO:0070585	protein localization to mitochondrion	82	2	0.43	0.07928
GO:0072655	establishment of protein localization to mitochondrion	82	2	0.43	0.07928
GO:0006626	protein targeting to mitochondrion	82	2	0.43	0.07928
GO:0010431	seed maturation	40	0	0.21	0.07975
GO:0009150	purine ribonucleotide metabolic process	698	2	3.64	0.08056
GO:1901659	glycosyl compound biosynthetic process	379	2	1.98	0.08098
GO:0010343	singlet oxygen-mediated programmed cell death	9	0	0.05	0.08111
GO:0071452	cellular response to singlet oxygen	9	0	0.05	0.08111
GO:0036473	cell death in response to oxidative stress	9	0	0.05	0.08111
GO:0097468	programmed cell death in response to reactive oxygen species	9	0	0.05	0.08111
GO:1902593	single-organism nuclear import	90	0	0.47	0.08137
GO:0044744	protein targeting to nucleus	90	0	0.47	0.08137
GO:0051170	nuclear import	90	0	0.47	0.08137
GO:0006606	protein import into nucleus	90	0	0.47	0.08137
GO:0042273	ribosomal large subunit biogenesis	184	0	0.96	0.08358
GO:0009800	cinnamic acid biosynthetic process	18	0	0.09	0.08425
GO:0009803	cinnamic acid metabolic process	18	0	0.09	0.08425
GO:0009145	purine nucleoside triphosphate biosynthetic process	241	2	1.26	0.08472
GO:0009206	purine ribonucleoside triphosphate biosynthetic process	241	2	1.26	0.08472
GO:0006733	oxidoreduction coenzyme metabolic process	95	0	0.5	0.08509
GO:0006754	ATP biosynthetic process	228	2	1.19	0.08517
GO:0034645	cellular macromolecule biosynthetic process	4856	22	25.34	0.08563
GO:0019752	carboxylic acid metabolic process	1805	7	9.42	0.08579
GO:0010467	gene expression	5459	34	28.49	0.08603
GO:0042538	hyperosmotic salinity response	21	0	0.11	0.08606
GO:0051186	cofactor metabolic process	446	1	2.33	0.08667
GO:0008037	cell recognition	63	0	0.33	0.08691
GO:0048544	recognition of pollen	63	0	0.33	0.08691
GO:0045488	pectin metabolic process	193	2	1.01	0.08748
GO:0010393	galacturonan metabolic process	193	2	1.01	0.08748
GO:0042255	ribosome assembly	169	0	0.88	0.08816
GO:0060968	regulation of gene silencing	20	0	0.1	0.08838
GO:0046128	purine ribonucleoside metabolic process	718	2	3.75	0.08869
GO:0034427	nuclear-transcribed mRNA catabolic process, exonucleolytic, 3'-5'	14	1	0.07	0.09011
GO:0018377	protein myristoylation	10	0	0.05	0.09067
GO:0006498	N-terminal protein lipidation	10	0	0.05	0.09067
GO:0006499	N-terminal protein myristoylation	10	0	0.05	0.09067
GO:0046040	IMP metabolic process	35	0	0.18	0.0918
GO:0007389	pattern specification process	109	2	0.57	0.09252
GO:0016116	carotenoid metabolic process	47	0	0.25	0.09304
GO:0016108	tetraterpenoid metabolic process	47	0	0.25	0.09304
GO:0090002	establishment of protein localization to plasma membrane	7	0	0.04	0.09352
GO:0043001	Golgi to plasma membrane protein transport	7	0	0.04	0.09352
GO:0007009	plasma membrane organization	7	0	0.04	0.09352
GO:0072659	protein localization to plasma membrane	7	0	0.04	0.09352
GO:0006970	response to osmotic stress	187	2	0.98	0.09358
GO:0008272	sulfate transport	35	3	0.18	0.09402
GO:0009904	chloroplast accumulation movement	22	0	0.11	0.09503
GO:0080050	regulation of seed development	18	0	0.09	0.09513
GO:0018108	peptidyl-tyrosine phosphorylation	48	0	0.25	0.09527
GO:0018212	peptidyl-tyrosine modification	48	0	0.25	0.09527
GO:0043648	dicarboxylic acid metabolic process	174	0	0.91	0.09565
GO:0009108	coenzyme biosynthetic process	197	0	1.03	0.0957
GO:0007265	Ras protein signal transduction	26	0	0.14	0.09575
GO:0046578	regulation of Ras protein signal transduction	26	0	0.14	0.09575
GO:0051056	regulation of small GTPase mediated signal transduction	26	0	0.14	0.09575
GO:0032011	ARF protein signal transduction	26	0	0.14	0.09575
GO:0032012	regulation of ARF protein signal transduction	26	0	0.14	0.09575
GO:0009820	alkaloid metabolic process	6	0	0.03	0.09608
GO:0009821	alkaloid biosynthetic process	6	0	0.03	0.09608
GO:0022610	biological adhesion	11	0	0.06	0.0965
GO:0007155	cell adhesion	11	0	0.06	0.0965
GO:0045903	positive regulation of translational fidelity	25	0	0.13	0.09701
GO:0015936	coenzyme A metabolic process	42	0	0.22	0.09803
GO:0017038	protein import	193	2	1.01	0.09812
GO:0006412	translation	1714	2	8.95	0.09865
GO:0010231	maintenance of seed dormancy	8	0	0.04	0.09915
GO:0097437	maintenance of dormancy	8	0	0.04	0.09915
GO:0044000	movement in host	15	0	0.08	0.09941
GO:0051814	movement in other organism involved in symbiotic interaction	15	0	0.08	0.09941
GO:0052192	movement in environment of other organism involved in symbiotic interaction	15	0	0.08	0.09941
GO:0052126	movement in host environment	15	0	0.08	0.09941
GO:0044766	multi-organism transport	15	0	0.08	0.09941
GO:0046794	transport of virus	15	0	0.08	0.09941
GO:0046739	transport of virus in multicellular host	15	0	0.08	0.09941
GO:0046365	monosaccharide catabolic process	57	0	0.3	0.09967
GO:0019320	hexose catabolic process	57	0	0.3	0.09967
GO:0015802	basic amino acid transport	13	1	0.07	0.10066
GO:0032509	endosome transport via multivesicular body sorting pathway	15	0	0.08	0.10071
GO:0034285	response to disaccharide	23	2	0.12	0.10089
GO:0000187	activation of MAPK activity	7	0	0.04	0.10172
GO:1902533	positive regulation of intracellular signal transduction	7	0	0.04	0.10172
GO:0043410	positive regulation of MAPK cascade	7	0	0.04	0.10172
GO:0043406	positive regulation of MAP kinase activity	7	0	0.04	0.10172
GO:0033387	putrescine biosynthetic process from ornithine	7	0	0.04	0.10173
GO:0001927	exocyst assembly	11	0	0.06	0.10238
GO:2000896	amylopectin metabolic process	7	0	0.04	0.10253
GO:0010021	amylopectin biosynthetic process	7	0	0.04	0.10253
GO:0098586	cellular response to virus	6	0	0.03	0.10646
GO:0051601	exocyst localization	15	0	0.08	0.10688
GO:0009888	tissue development	263	6	1.37	0.10812
GO:0071214	cellular response to abiotic stimulus	66	5	0.34	0.10863
GO:0006189	'de novo' IMP biosynthetic process	28	0	0.15	0.10892
GO:0006435	threonyl-tRNA aminoacylation	7	0	0.04	0.1094
GO:0046173	polyol biosynthetic process	12	0	0.06	0.11013
GO:0009875	pollen-pistil interaction	65	0	0.34	0.11039
GO:0046653	tetrahydrofolate metabolic process	34	0	0.18	0.11041
GO:0090407	organophosphate biosynthetic process	627	2	3.27	0.11114
GO:0009201	ribonucleoside triphosphate biosynthetic process	257	2	1.34	0.11114
GO:0034032	purine nucleoside bisphosphate metabolic process	54	0	0.28	0.11163
GO:0033865	nucleoside bisphosphate metabolic process	54	0	0.28	0.11163
GO:0033875	ribonucleoside bisphosphate metabolic process	54	0	0.28	0.11163
GO:0006188	IMP biosynthetic process	31	0	0.16	0.11318
GO:0009123	nucleoside monophosphate metabolic process	546	2	2.85	0.11323
GO:0006122	mitochondrial electron transport, ubiquinol to cytochrome c	30	0	0.16	0.11347
GO:0006596	polyamine biosynthetic process	44	0	0.23	0.11394
GO:0009081	branched-chain amino acid metabolic process	62	0	0.32	0.11434
GO:0002181	cytoplasmic translation	131	0	0.68	0.11484
GO:0019321	pentose metabolic process	45	0	0.23	0.11533
GO:0000105	histidine biosynthetic process	16	0	0.08	0.11586
GO:0052803	imidazole-containing compound metabolic process	16	0	0.08	0.11586
GO:0006547	histidine metabolic process	16	0	0.08	0.11586
GO:0043091	L-arginine import	10	0	0.05	0.1164
GO:0043092	L-amino acid import	10	0	0.05	0.1164
GO:0090467	arginine import	10	0	0.05	0.1164
GO:1902023	L-arginine transport	10	0	0.05	0.1164
GO:0015809	arginine transport	10	0	0.05	0.1164
GO:1901661	quinone metabolic process	28	0	0.15	0.11653
GO:1901663	quinone biosynthetic process	28	0	0.15	0.11653
GO:0042181	ketone biosynthetic process	28	0	0.15	0.11653
GO:0018130	heterocycle biosynthetic process	3421	22	17.85	0.11678
GO:0010951	negative regulation of endopeptidase activity	53	0	0.28	0.11705
GO:0052548	regulation of endopeptidase activity	53	0	0.28	0.11705
GO:0044763	single-organism cellular process	10105	49	52.74	0.11731
GO:0070534	protein K63-linked ubiquitination	10	0	0.05	0.1179
GO:0009690	cytokinin metabolic process	44	0	0.23	0.11912
GO:0009142	nucleoside triphosphate biosynthetic process	264	2	1.38	0.11975
GO:0050777	negative regulation of immune response	11	0	0.06	0.11983
GO:0045824	negative regulation of innate immune response	11	0	0.06	0.11983
GO:0048528	post-embryonic root development	41	0	0.21	0.12003
GO:0015695	organic cation transport	18	1	0.09	0.1203
GO:2001293	malonyl-CoA metabolic process	27	0	0.14	0.1204
GO:0034475	U4 snRNA 3'-end processing	11	1	0.06	0.12041
GO:0030837	negative regulation of actin filament polymerization	13	0	0.07	0.12102
GO:0032272	negative regulation of protein polymerization	13	0	0.07	0.12102
GO:0031333	negative regulation of protein complex assembly	13	0	0.07	0.12102
GO:0051494	negative regulation of cytoskeleton organization	13	0	0.07	0.12102
GO:0051301	cell division	433	1	2.26	0.12119
GO:0010218	response to far red light	9	0	0.05	0.12138
GO:0009060	aerobic respiration	139	0	0.73	0.12167
GO:0031023	microtubule organizing center organization	26	0	0.14	0.12203
GO:0009260	ribonucleotide biosynthetic process	358	2	1.87	0.12229
GO:0046390	ribose phosphate biosynthetic process	358	2	1.87	0.12229
GO:0016192	vesicle-mediated transport	669	0	3.49	0.12291
GO:0031086	nuclear-transcribed mRNA catabolic process, deadenylation-independent decay	9	0	0.05	0.12317
GO:0031087	deadenylation-independent decapping of nuclear-transcribed mRNA	9	0	0.05	0.12317
GO:0071554	cell wall organization or biogenesis	810	3	4.23	0.12336
GO:0051513	regulation of monopolar cell growth	7	0	0.04	0.12563
GO:1902358	sulfate transmembrane transport	29	1	0.15	0.12647
GO:0006301	postreplication repair	20	0	0.1	0.12737
GO:0031221	arabinan metabolic process	16	0	0.08	0.12759
GO:0031222	arabinan catabolic process	16	0	0.08	0.12759
GO:0016032	viral process	28	0	0.15	0.12769
GO:0019720	Mo-molybdopterin cofactor metabolic process	12	0	0.06	0.12804
GO:0006777	Mo-molybdopterin cofactor biosynthetic process	12	0	0.06	0.12804
GO:0046496	nicotinamide nucleotide metabolic process	75	0	0.39	0.12844
GO:0046474	glycerophospholipid biosynthetic process	79	0	0.41	0.13025
GO:0009639	response to red or far red light	79	0	0.41	0.13066
GO:0009769	photosynthesis, light harvesting in photosystem II	16	0	0.08	0.13074
GO:0010101	post-embryonic root morphogenesis	28	0	0.15	0.13298
GO:0010102	lateral root morphogenesis	28	0	0.15	0.13298
GO:0007166	cell surface receptor signaling pathway	128	0	0.67	0.13356
GO:0034030	ribonucleoside bisphosphate biosynthetic process	34	0	0.18	0.1342
GO:0034033	purine nucleoside bisphosphate biosynthetic process	34	0	0.18	0.1342
GO:0033866	nucleoside bisphosphate biosynthetic process	34	0	0.18	0.1342
GO:0015937	coenzyme A biosynthetic process	34	0	0.18	0.1342
GO:0006526	arginine biosynthetic process	23	0	0.12	0.13443
GO:0072583	clathrin-mediated endocytosis	13	0	0.07	0.13471
GO:0009744	response to sucrose	22	2	0.11	0.1348
GO:0036265	RNA (guanine-N7)-methylation	11	2	0.06	0.13546
GO:0051649	establishment of localization in cell	1057	3	5.52	0.1356
GO:0017006	protein-tetrapyrrole linkage	16	0	0.08	0.13625
GO:0071426	ribonucleoprotein complex export from nucleus	15	0	0.08	0.13676
GO:0071166	ribonucleoprotein complex localization	15	0	0.08	0.13676
GO:1902586	multi-organism intercellular transport	8	0	0.04	0.13715
GO:0046740	transport of virus in host, cell to cell	8	0	0.04	0.13715
GO:0009088	threonine biosynthetic process	8	0	0.04	0.13734
GO:0008535	respiratory chain complex IV assembly	14	0	0.07	0.13795
GO:0006072	glycerol-3-phosphate metabolic process	12	0	0.06	0.13843
GO:0042435	indole-containing compound biosynthetic process	37	0	0.19	0.13939
GO:0009162	deoxyribonucleoside monophosphate metabolic process	11	0	0.06	0.1414
GO:0009157	deoxyribonucleoside monophosphate biosynthetic process	11	0	0.06	0.1414
GO:0043436	oxoacid metabolic process	1837	7	9.59	0.14237
GO:0098655	cation transmembrane transport	764	8	3.99	0.14285
GO:0016114	terpenoid biosynthetic process	138	0	0.72	0.14325
GO:0000023	maltose metabolic process	9	0	0.05	0.14405
GO:0006464	cellular protein modification process	3653	14	19.07	0.145
GO:0036211	protein modification process	3653	14	19.07	0.145
GO:0006379	mRNA cleavage	15	0	0.08	0.14508
GO:0006525	arginine metabolic process	33	0	0.17	0.14624
GO:0000003	reproduction	214	2	1.12	0.14662
GO:0010588	cotyledon vascular tissue pattern formation	8	0	0.04	0.14732
GO:0006014	D-ribose metabolic process	17	0	0.09	0.1476
GO:0042822	pyridoxal phosphate metabolic process	13	0	0.07	0.14773
GO:0042823	pyridoxal phosphate biosynthetic process	13	0	0.07	0.14773
GO:0006431	methionyl-tRNA aminoacylation	10	0	0.05	0.14816
GO:0006082	organic acid metabolic process	1843	7	9.62	0.14828
GO:0033617	mitochondrial respiratory chain complex IV assembly	12	0	0.06	0.14842
GO:0010346	shoot axis formation	18	0	0.09	0.14846
GO:0010223	secondary shoot formation	18	0	0.09	0.14846
GO:0001763	morphogenesis of a branching structure	18	0	0.09	0.14846
GO:0015991	ATP hydrolysis coupled proton transport	160	3	0.84	0.14884
GO:0015988	energy coupled proton transmembrane transport, against electrochemical gradient	160	3	0.84	0.14884
GO:0042548	regulation of photosynthesis, light reaction	20	0	0.1	0.14986
GO:0043467	regulation of generation of precursor metabolites and energy	20	0	0.1	0.14986
GO:0000162	tryptophan biosynthetic process	30	0	0.16	0.15075
GO:0046219	indolalkylamine biosynthetic process	30	0	0.16	0.15075
GO:0032412	regulation of ion transmembrane transporter activity	6	0	0.03	0.15081
GO:0032409	regulation of transporter activity	6	0	0.03	0.15081
GO:0022898	regulation of transmembrane transporter activity	6	0	0.03	0.15081
GO:0044273	sulfur compound catabolic process	21	0	0.11	0.15087
GO:0000413	protein peptidyl-prolyl isomerization	103	0	0.54	0.15094
GO:0019362	pyridine nucleotide metabolic process	76	0	0.4	0.15098
GO:0035674	tricarboxylic acid transmembrane transport	9	0	0.05	0.1527
GO:0006112	energy reserve metabolic process	36	1	0.19	0.15297
GO:0005977	glycogen metabolic process	36	1	0.19	0.15297
GO:0034063	stress granule assembly	7	0	0.04	0.15358
GO:0071918	urea transmembrane transport	7	0	0.04	0.15391
GO:0015840	urea transport	7	0	0.04	0.15391
GO:0006605	protein targeting	321	2	1.68	0.15431
GO:0034654	nucleobase-containing compound biosynthetic process	3120	21	16.28	0.15478
GO:0051321	meiotic cell cycle	104	1	0.54	0.15484
GO:0006576	cellular biogenic amine metabolic process	124	0	0.65	0.15531
GO:0051054	positive regulation of DNA metabolic process	7	0	0.04	0.15531
GO:0006829	zinc ion transport	50	1	0.26	0.15598
GO:0007127	meiosis I	50	1	0.26	0.15639
GO:0070271	protein complex biogenesis	591	2	3.08	0.1564
GO:0006767	water-soluble vitamin metabolic process	65	1	0.34	0.15753
GO:0040011	locomotion	18	0	0.09	0.15761
GO:1901566	organonitrogen compound biosynthetic process	1103	7	5.76	0.15822
GO:0042454	ribonucleoside catabolic process	135	0	0.7	0.15936
GO:0042391	regulation of membrane potential	64	1	0.33	0.15956
GO:0046835	carbohydrate phosphorylation	52	0	0.27	0.1599
GO:0071840	cellular component organization or biogenesis	3580	18	18.68	0.16038
GO:0006721	terpenoid metabolic process	170	0	0.89	0.16051
GO:0006461	protein complex assembly	589	2	3.07	0.16155
GO:0071822	protein complex subunit organization	730	2	3.81	0.1618
GO:0019509	L-methionine biosynthetic process from methylthioadenosine	17	0	0.09	0.16198
GO:0071267	L-methionine salvage	17	0	0.09	0.16198
GO:0043102	amino acid salvage	17	0	0.09	0.16198
GO:0009071	serine family amino acid catabolic process	17	0	0.09	0.16209
GO:1901135	carbohydrate derivative metabolic process	1298	2	6.77	0.16217
GO:0046323	glucose import	50	0	0.26	0.16233
GO:0015758	glucose transport	50	0	0.26	0.16233
GO:0009826	unidimensional cell growth	102	0	0.53	0.1632
GO:0033238	regulation of cellular amine metabolic process	18	0	0.09	0.16439
GO:0006521	regulation of cellular amino acid metabolic process	18	0	0.09	0.16439
GO:0006813	potassium ion transport	134	1	0.7	0.16476
GO:0043085	positive regulation of catalytic activity	204	2	1.06	0.16549
GO:0044093	positive regulation of molecular function	204	2	1.06	0.16549
GO:0000054	ribosomal subunit export from nucleus	13	0	0.07	0.16638
GO:0033750	ribosome localization	13	0	0.07	0.16638
GO:0033753	establishment of ribosome localization	13	0	0.07	0.16638
GO:0071428	rRNA-containing ribonucleoprotein complex export from nucleus	13	0	0.07	0.16638
GO:0071489	cellular response to red or far red light	24	0	0.13	0.16675
GO:0010017	red or far-red light signaling pathway	24	0	0.13	0.16675
GO:0051123	RNA polymerase II transcriptional preinitiation complex assembly	42	0	0.22	0.16718
GO:0034599	cellular response to oxidative stress	274	5	1.43	0.1674
GO:0007052	mitotic spindle organization	36	0	0.19	0.16747
GO:0045292	mRNA cis splicing, via spliceosome	18	0	0.09	0.16815
GO:0018193	peptidyl-amino acid modification	512	3	2.67	0.16896
GO:0072488	ammonium transmembrane transport	19	1	0.1	0.16922
GO:0009446	putrescine biosynthetic process	19	0	0.1	0.16959
GO:0001676	long-chain fatty acid metabolic process	13	0	0.07	0.16986
GO:0051641	cellular localization	1171	4	6.11	0.17033
GO:0044710	single-organism metabolic process	7870	40	41.07	0.17096
GO:0000302	response to reactive oxygen species	240	5	1.25	0.1711
GO:0080154	regulation of fertilization	6	0	0.03	0.17128
GO:0080155	regulation of double fertilization forming a zygote and endosperm	6	0	0.03	0.17128
GO:0046394	carboxylic acid biosynthetic process	775	4	4.04	0.17216
GO:0016053	organic acid biosynthetic process	775	4	4.04	0.17216
GO:0000122	negative regulation of transcription from RNA polymerase II promoter	12	0	0.06	0.17268
GO:1901576	organic substance biosynthetic process	7207	37	37.61	0.17321
GO:0006351	transcription, DNA-templated	2543	19	13.27	0.17398
GO:0006513	protein monoubiquitination	11	0	0.06	0.17428
GO:0044724	single-organism carbohydrate catabolic process	217	0	1.13	0.17449
GO:0009154	purine ribonucleotide catabolic process	128	0	0.67	0.1745
GO:0009118	regulation of nucleoside metabolic process	128	0	0.67	0.1745
GO:0009261	ribonucleotide catabolic process	128	0	0.67	0.1745
GO:1900542	regulation of purine nucleotide metabolic process	128	0	0.67	0.1745
GO:0034754	cellular hormone metabolic process	47	0	0.25	0.17513
GO:1902582	single-organism intracellular transport	615	3	3.21	0.1754
GO:0044085	cellular component biogenesis	1695	8	8.85	0.17621
GO:0022613	ribonucleoprotein complex biogenesis	755	5	3.94	0.17695
GO:0042549	photosystem II stabilization	7	0	0.04	0.17721
GO:0010162	seed dormancy process	22	0	0.11	0.17736
GO:0022611	dormancy process	22	0	0.11	0.17736
GO:0006817	phosphate ion transport	28	0	0.15	0.17757
GO:0006119	oxidative phosphorylation	204	0	1.06	0.17759
GO:0042278	purine nucleoside metabolic process	726	2	3.79	0.17798
GO:0051346	negative regulation of hydrolase activity	64	0	0.33	0.17852
GO:0009099	valine biosynthetic process	11	0	0.06	0.17877
GO:0031407	oxylipin metabolic process	35	1	0.18	0.17894
GO:0031408	oxylipin biosynthetic process	35	1	0.18	0.17894
GO:0006120	mitochondrial electron transport, NADH to ubiquinone	20	0	0.1	0.17914
GO:0019637	organophosphate metabolic process	1317	3	6.87	0.17915
GO:0071577	zinc ion transmembrane transport	48	1	0.25	0.17931
GO:0009611	response to wounding	58	0	0.3	0.18106
GO:0006195	purine nucleotide catabolic process	131	0	0.68	0.18112
GO:0007020	microtubule nucleation	21	0	0.11	0.18155
GO:0031109	microtubule polymerization or depolymerization	21	0	0.11	0.18155
GO:0046785	microtubule polymerization	21	0	0.11	0.18155
GO:0003002	regionalization	91	0	0.47	0.18171
GO:0090150	establishment of protein localization to membrane	85	1	0.44	0.18175
GO:0072657	protein localization to membrane	85	1	0.44	0.18175
GO:0048589	developmental growth	149	0	0.78	0.18201
GO:0010466	negative regulation of peptidase activity	55	0	0.29	0.18224
GO:0052547	regulation of peptidase activity	55	0	0.29	0.18224
GO:0006661	phosphatidylinositol biosynthetic process	47	0	0.25	0.18233
GO:2001295	malonyl-CoA biosynthetic process	26	0	0.14	0.18242
GO:0044271	cellular nitrogen compound biosynthetic process	3420	23	17.85	0.18293
GO:0045493	xylan catabolic process	19	0	0.1	0.18306
GO:0031647	regulation of protein stability	13	0	0.07	0.1836
GO:0050821	protein stabilization	13	0	0.07	0.1836
GO:0006624	vacuolar protein processing	15	0	0.08	0.18377
GO:0045727	positive regulation of translation	48	0	0.25	0.18447
GO:0030811	regulation of nucleotide catabolic process	127	0	0.66	0.18529
GO:0009203	ribonucleoside triphosphate catabolic process	127	0	0.66	0.18529
GO:0009207	purine ribonucleoside triphosphate catabolic process	127	0	0.66	0.18529
GO:0033121	regulation of purine nucleotide catabolic process	127	0	0.66	0.18529
GO:0010267	production of ta-siRNAs involved in RNA interference	12	0	0.06	0.18531
GO:0051938	L-glutamate import	9	0	0.05	0.18599
GO:0015813	L-glutamate transport	9	0	0.05	0.18599
GO:0015800	acidic amino acid transport	9	0	0.05	0.18599
GO:0032324	molybdopterin cofactor biosynthetic process	13	0	0.07	0.18641
GO:0043545	molybdopterin cofactor metabolic process	13	0	0.07	0.18641
GO:0051189	prosthetic group metabolic process	13	0	0.07	0.18641
GO:0032774	RNA biosynthetic process	2556	19	13.34	0.18667
GO:0016071	mRNA metabolic process	517	4	2.7	0.18688
GO:0072337	modified amino acid transport	6	0	0.03	0.18695
GO:0034220	ion transmembrane transport	1090	13	5.69	0.18824
GO:0051345	positive regulation of hydrolase activity	123	0	0.64	0.18884
GO:0072594	establishment of protein localization to organelle	309	2	1.61	0.19026
GO:0046130	purine ribonucleoside catabolic process	132	0	0.69	0.19039
GO:1901657	glycosyl compound metabolic process	853	3	4.45	0.19172
GO:0009058	biosynthetic process	7617	42	39.75	0.19199
GO:0070646	protein modification by small protein removal	101	0	0.53	0.19273
GO:0010206	photosystem II repair	21	0	0.11	0.19382
GO:0009880	embryonic pattern specification	16	0	0.08	0.19424
GO:0035967	cellular response to topologically incorrect protein	12	0	0.06	0.19428
GO:0006468	protein phosphorylation	1823	7	9.51	0.19474
GO:0043244	regulation of protein complex disassembly	14	0	0.07	0.19502
GO:1902850	microtubule cytoskeleton organization involved in mitosis	18	0	0.09	0.19511
GO:2000756	regulation of peptidyl-lysine acetylation	23	0	0.12	0.19518
GO:1901983	regulation of protein acetylation	23	0	0.12	0.19518
GO:0035065	regulation of histone acetylation	23	0	0.12	0.19518
GO:0051262	protein tetramerization	8	0	0.04	0.19604
GO:0009956	radial pattern formation	13	0	0.07	0.19634
GO:0000103	sulfate assimilation	67	0	0.35	0.19694
GO:0034497	protein localization to pre-autophagosomal structure	9	0	0.05	0.19722
GO:0033044	regulation of chromosome organization	43	0	0.22	0.19745
GO:0072521	purine-containing compound metabolic process	797	2	4.16	0.19746
GO:0000387	spliceosomal snRNP assembly	39	0	0.2	0.19835
GO:1902222	erythrose 4-phosphate/phosphoenolpyruvate family amino acid catabolic process	22	0	0.11	0.19941
GO:0006559	L-phenylalanine catabolic process	22	0	0.11	0.19941
GO:0015992	proton transport	545	4	2.84	0.20006
GO:0006818	hydrogen transport	545	4	2.84	0.20006
GO:0048193	Golgi vesicle transport	190	0	0.99	0.20019
GO:0009146	purine nucleoside triphosphate catabolic process	130	0	0.68	0.20035
GO:0006140	regulation of nucleotide metabolic process	130	0	0.68	0.20035
GO:0022406	membrane docking	96	0	0.5	0.20037
GO:0070475	rRNA base methylation	14	2	0.07	0.20072
GO:0072348	sulfur compound transport	50	3	0.26	0.2011
GO:0006426	glycyl-tRNA aminoacylation	6	0	0.03	0.20121
GO:0009942	longitudinal axis specification	9	0	0.05	0.20142
GO:0000578	embryonic axis specification	9	0	0.05	0.20142
GO:0006302	double-strand break repair	89	1	0.46	0.20204
GO:0042450	arginine biosynthetic process via ornithine	7	0	0.04	0.20234
GO:0042180	cellular ketone metabolic process	77	0	0.4	0.20263
GO:0034629	cellular protein complex localization	20	0	0.1	0.20349
GO:0031503	protein complex localization	20	0	0.1	0.20349
GO:2000034	regulation of seed maturation	14	0	0.07	0.20359
GO:0045454	cell redox homeostasis	219	1	1.14	0.20413
GO:0034472	snRNA 3'-end processing	12	1	0.06	0.20451
GO:0016579	protein deubiquitination	81	0	0.42	0.20478
GO:0071265	L-methionine biosynthetic process	20	0	0.1	0.20505
GO:0000098	sulfur amino acid catabolic process	6	0	0.03	0.20524
GO:0019438	aromatic compound biosynthetic process	3517	25	18.36	0.20584
GO:0010027	thylakoid membrane organization	37	0	0.19	0.20737
GO:0009668	plastid membrane organization	37	0	0.19	0.20737
GO:0031627	telomeric loop formation	18	0	0.09	0.20775
GO:0009739	response to gibberellin	50	0	0.26	0.20859
GO:1901292	nucleoside phosphate catabolic process	141	0	0.74	0.20929
GO:1901701	cellular response to oxygen-containing compound	558	8	2.91	0.20946
GO:0046467	membrane lipid biosynthetic process	72	2	0.38	0.20978
GO:0048364	root development	177	2	0.92	0.21015
GO:0022622	root system development	177	2	0.92	0.21015
GO:0048527	lateral root development	37	0	0.19	0.21124
GO:0035999	tetrahydrofolate interconversion	27	0	0.14	0.21178
GO:0044764	multi-organism cellular process	40	0	0.21	0.2118
GO:0048569	post-embryonic organ development	136	0	0.71	0.21192
GO:0007126	meiotic nuclear division	82	1	0.43	0.21245
GO:0009247	glycolipid biosynthetic process	57	0	0.3	0.21255
GO:0016043	cellular component organization	3095	13	16.15	0.21259
GO:0019740	nitrogen utilization	17	1	0.09	0.21347
GO:0000042	protein targeting to Golgi	7	0	0.04	0.21349
GO:0072600	establishment of protein localization to Golgi	7	0	0.04	0.21349
GO:0046036	CTP metabolic process	29	0	0.15	0.21379
GO:0006241	CTP biosynthetic process	29	0	0.15	0.21379
GO:0045898	regulation of RNA polymerase II transcriptional preinitiation complex assembly	33	0	0.17	0.21382
GO:0045899	positive regulation of RNA polymerase II transcriptional preinitiation complex assembly	33	0	0.17	0.21382
GO:0030488	tRNA methylation	38	2	0.2	0.21383
GO:0010114	response to red light	7	0	0.04	0.21434
GO:0018208	peptidyl-proline modification	106	0	0.55	0.21558
GO:0046434	organophosphate catabolic process	177	0	0.92	0.21702
GO:0043289	apocarotenoid biosynthetic process	9	0	0.05	0.21742
GO:0032392	DNA geometric change	63	2	0.33	0.2203
GO:0032508	DNA duplex unwinding	63	2	0.33	0.2203
GO:0052646	alditol phosphate metabolic process	15	0	0.08	0.2206
GO:0071478	cellular response to radiation	56	3	0.29	0.22091
GO:0000422	mitochondrion degradation	14	0	0.07	0.2222
GO:0030865	cortical cytoskeleton organization	8	0	0.04	0.2222
GO:0046513	ceramide biosynthetic process	13	2	0.07	0.22226
GO:0048729	tissue morphogenesis	6	0	0.03	0.22246
GO:0002009	morphogenesis of an epithelium	6	0	0.03	0.22246
GO:0001736	establishment of planar polarity	6	0	0.03	0.22246
GO:0001738	morphogenesis of a polarized epithelium	6	0	0.03	0.22246
GO:0007164	establishment of tissue polarity	6	0	0.03	0.22246
GO:0010310	regulation of hydrogen peroxide metabolic process	6	0	0.03	0.22261
GO:0080140	regulation of jasmonic acid metabolic process	6	0	0.03	0.22275
GO:0080141	regulation of jasmonic acid biosynthetic process	6	0	0.03	0.22275
GO:0031167	rRNA methylation	34	2	0.18	0.22305
GO:0000018	regulation of DNA recombination	8	0	0.04	0.2236
GO:0006996	organelle organization	1710	10	8.92	0.22414
GO:0044249	cellular biosynthetic process	6860	35	35.8	0.22448
GO:0006268	DNA unwinding involved in DNA replication	11	0	0.06	0.22451
GO:0009265	2'-deoxyribonucleotide biosynthetic process	9	0	0.05	0.22453
GO:0009221	pyrimidine deoxyribonucleotide biosynthetic process	9	0	0.05	0.22453
GO:0009219	pyrimidine deoxyribonucleotide metabolic process	9	0	0.05	0.22453
GO:0046385	deoxyribose phosphate biosynthetic process	9	0	0.05	0.22453
GO:0009625	response to insect	7	0	0.04	0.2252
GO:0002213	defense response to insect	7	0	0.04	0.2252
GO:0009836	fruit ripening, climacteric	6	0	0.03	0.22538
GO:0045132	meiotic chromosome segregation	24	0	0.13	0.22714
GO:0009161	ribonucleoside monophosphate metabolic process	535	2	2.79	0.22768
GO:0008652	cellular amino acid biosynthetic process	420	2	2.19	0.22774
GO:0006928	cellular component movement	110	0	0.57	0.22803
GO:0007018	microtubule-based movement	110	0	0.57	0.22803
GO:0007131	reciprocal meiotic recombination	41	0	0.21	0.22818
GO:0035825	reciprocal DNA recombination	41	0	0.21	0.22818
GO:0043547	positive regulation of GTPase activity	116	0	0.61	0.22928
GO:0009141	nucleoside triphosphate metabolic process	622	2	3.25	0.22928
GO:0033554	cellular response to stress	785	10	4.1	0.22958
GO:0000956	nuclear-transcribed mRNA catabolic process	90	1	0.47	0.23017
GO:0009166	nucleotide catabolic process	138	0	0.72	0.23024
GO:0006491	N-glycan processing	16	0	0.08	0.2304
GO:0030641	regulation of cellular pH	48	0	0.25	0.23204
GO:0051453	regulation of intracellular pH	48	0	0.25	0.23204
GO:0045489	pectin biosynthetic process	40	1	0.21	0.23217
GO:0010193	response to ozone	6	0	0.03	0.23218
GO:0009119	ribonucleoside metabolic process	770	2	4.02	0.23238
GO:0090307	spindle assembly involved in mitosis	16	0	0.08	0.23398
GO:0051415	interphase microtubule nucleation by interphase microtubule organizing center	16	0	0.08	0.23398
GO:0051418	microtubule nucleation by microtubule organizing center	16	0	0.08	0.23398
GO:0051298	centrosome duplication	16	0	0.08	0.23398
GO:0042372	phylloquinone biosynthetic process	6	0	0.03	0.2345
GO:0042374	phylloquinone metabolic process	6	0	0.03	0.2345
GO:0009658	chloroplast organization	162	0	0.85	0.23452
GO:2000022	regulation of jasmonic acid mediated signaling pathway	17	0	0.09	0.23453
GO:0070897	DNA-templated transcriptional preinitiation complex assembly	43	0	0.22	0.23453
GO:0042218	1-aminocyclopropane-1-carboxylate biosynthetic process	29	0	0.15	0.23479
GO:0018871	1-aminocyclopropane-1-carboxylate metabolic process	29	0	0.15	0.23479
GO:0051241	negative regulation of multicellular organismal process	54	0	0.28	0.23666
GO:0009143	nucleoside triphosphate catabolic process	135	0	0.7	0.23681
GO:0009445	putrescine metabolic process	20	0	0.1	0.23683
GO:0006346	methylation-dependent chromatin silencing	9	0	0.05	0.23733
GO:0010252	auxin homeostasis	20	0	0.1	0.23736
GO:0010075	regulation of meristem growth	21	0	0.11	0.2386
GO:0015819	lysine transport	11	1	0.06	0.23867
GO:1902022	L-lysine transport	11	1	0.06	0.23867
GO:1903401	L-lysine transmembrane transport	11	1	0.06	0.23867
GO:0034614	cellular response to reactive oxygen species	214	5	1.12	0.23941
GO:0032259	methylation	575	4	3	0.24051
GO:0034227	tRNA thio-modification	10	0	0.05	0.24101
GO:0042364	water-soluble vitamin biosynthetic process	62	1	0.32	0.24145
GO:0070988	demethylation	11	0	0.06	0.24155
GO:0009176	pyrimidine deoxyribonucleoside monophosphate metabolic process	6	0	0.03	0.24247
GO:0009177	pyrimidine deoxyribonucleoside monophosphate biosynthetic process	6	0	0.03	0.24247
GO:0034976	response to endoplasmic reticulum stress	30	0	0.16	0.24354
GO:0019755	one-carbon compound transport	12	0	0.06	0.24355
GO:0042430	indole-containing compound metabolic process	60	0	0.31	0.2436
GO:0043067	regulation of programmed cell death	38	0	0.2	0.24383
GO:0071483	cellular response to blue light	9	0	0.05	0.24404
GO:0030522	intracellular receptor signaling pathway	9	0	0.05	0.24404
GO:0009785	blue light signaling pathway	9	0	0.05	0.24404
GO:0000394	RNA splicing, via endonucleolytic cleavage and ligation	18	0	0.09	0.24413
GO:0019252	starch biosynthetic process	32	1	0.17	0.2442
GO:1902580	single-organism cellular localization	127	1	0.66	0.24434
GO:1902578	single-organism localization	127	1	0.66	0.24434
GO:0032506	cytokinetic process	53	0	0.28	0.24504
GO:0015749	monosaccharide transport	54	0	0.28	0.2452
GO:0046942	carboxylic acid transport	208	3	1.09	0.2457
GO:0015849	organic acid transport	208	3	1.09	0.2457
GO:0000917	barrier septum assembly	9	0	0.05	0.24571
GO:0090529	cell septum assembly	9	0	0.05	0.24571
GO:0071804	cellular potassium ion transport	116	1	0.61	0.24605
GO:0071805	potassium ion transmembrane transport	116	1	0.61	0.24605
GO:0045017	glycerolipid biosynthetic process	111	0	0.58	0.24702
GO:0009853	photorespiration	39	2	0.2	0.24716
GO:0006568	tryptophan metabolic process	41	0	0.21	0.24717
GO:0006586	indolalkylamine metabolic process	41	0	0.21	0.24717
GO:0043631	RNA polyadenylation	20	0	0.1	0.24754
GO:0033385	geranylgeranyl diphosphate metabolic process	9	0	0.05	0.24799
GO:0006796	phosphate-containing compound metabolic process	4138	15	21.6	0.24873
GO:0071029	nuclear ncRNA surveillance	6	1	0.03	0.24881
GO:0071046	nuclear polyadenylation-dependent ncRNA catabolic process	6	1	0.03	0.24881
GO:0071035	nuclear polyadenylation-dependent rRNA catabolic process	6	1	0.03	0.24881
GO:0071038	nuclear polyadenylation-dependent tRNA catabolic process	6	1	0.03	0.24881
GO:0043633	polyadenylation-dependent RNA catabolic process	6	1	0.03	0.24881
GO:0043634	polyadenylation-dependent ncRNA catabolic process	6	1	0.03	0.24881
GO:0000467	exonucleolytic trimming to generate mature 3'-end of 5.8S rRNA from tricistronic rRNA transcript (SSU-rRNA, 5.8S rRNA, LSU-rRNA)	6	1	0.03	0.24881
GO:0000459	exonucleolytic trimming involved in rRNA processing	6	1	0.03	0.24881
GO:0016078	tRNA catabolic process	6	1	0.03	0.24881
GO:0043928	exonucleolytic nuclear-transcribed mRNA catabolic process involved in deadenylation-dependent decay	6	1	0.03	0.24881
GO:0008544	epidermis development	107	1	0.56	0.24893
GO:0043588	skin development	107	1	0.56	0.24893
GO:0060429	epithelium development	107	1	0.56	0.24893
GO:0010412	mannan metabolic process	25	0	0.13	0.24899
GO:0046355	mannan catabolic process	25	0	0.13	0.24899
GO:0032147	activation of protein kinase activity	37	0	0.19	0.24925
GO:0006904	vesicle docking involved in exocytosis	38	0	0.2	0.24977
GO:0009205	purine ribonucleoside triphosphate metabolic process	589	2	3.07	0.25209
GO:0000280	nuclear division	155	1	0.81	0.25219
GO:0045860	positive regulation of protein kinase activity	48	0	0.25	0.25238
GO:0033674	positive regulation of kinase activity	48	0	0.25	0.25238
GO:0060560	developmental growth involved in morphogenesis	113	0	0.59	0.25338
GO:0010374	stomatal complex development	33	1	0.17	0.25342
GO:0090558	plant epidermis development	33	1	0.17	0.25342
GO:2000278	regulation of DNA biosynthetic process	8	0	0.04	0.25387
GO:0032204	regulation of telomere maintenance	8	0	0.04	0.25387
GO:0051972	regulation of telomerase activity	8	0	0.04	0.25387
GO:0051974	negative regulation of telomerase activity	8	0	0.04	0.25387
GO:0009303	rRNA transcription	6	1	0.03	0.25503
GO:0009144	purine nucleoside triphosphate metabolic process	592	2	3.09	0.25534
GO:0007215	glutamate receptor signaling pathway	32	0	0.17	0.25534
GO:0035235	ionotropic glutamate receptor signaling pathway	32	0	0.17	0.25534
GO:0051156	glucose 6-phosphate metabolic process	11	0	0.06	0.25621
GO:0002239	response to oomycetes	13	0	0.07	0.2565
GO:0006885	regulation of pH	81	0	0.42	0.25651
GO:1901658	glycosyl compound catabolic process	148	0	0.77	0.25659
GO:0009816	defense response to bacterium, incompatible interaction	14	0	0.07	0.25662
GO:0018196	peptidyl-asparagine modification	17	0	0.09	0.25794
GO:0018279	protein N-linked glycosylation via asparagine	17	0	0.09	0.25794
GO:0009725	response to hormone	977	3	5.1	0.25815
GO:0043171	peptide catabolic process	14	0	0.07	0.25836
GO:0051493	regulation of cytoskeleton organization	47	0	0.25	0.25849
GO:0046039	GTP metabolic process	134	0	0.7	0.25895
GO:0015696	ammonium transport	21	1	0.11	0.25899
GO:0097034	mitochondrial respiratory chain complex IV biogenesis	14	0	0.07	0.2593
GO:0051225	spindle assembly	30	0	0.16	0.26004
GO:1901069	guanosine-containing compound catabolic process	121	0	0.63	0.26062
GO:0043087	regulation of GTPase activity	121	0	0.63	0.26062
GO:0006184	GTP catabolic process	121	0	0.63	0.26062
GO:0033124	regulation of GTP catabolic process	121	0	0.63	0.26062
GO:1901362	organic cyclic compound biosynthetic process	3680	23	19.21	0.26162
GO:0043090	amino acid import	16	0	0.08	0.2622
GO:0000478	endonucleolytic cleavage involved in rRNA processing	19	0	0.1	0.26296
GO:0000479	endonucleolytic cleavage of tricistronic rRNA transcript (SSU-rRNA, 5.8S rRNA, LSU-rRNA)	19	0	0.1	0.26296
GO:0009719	response to endogenous stimulus	980	3	5.11	0.26327
GO:0009718	anthocyanin-containing compound biosynthetic process	13	1	0.07	0.26362
GO:0005976	polysaccharide metabolic process	635	5	3.31	0.26444
GO:1902047	polyamine transmembrane transport	7	0	0.04	0.26506
GO:2000762	regulation of phenylpropanoid metabolic process	6	0	0.03	0.26538
GO:0042546	cell wall biogenesis	185	0	0.97	0.26585
GO:0009394	2'-deoxyribonucleotide metabolic process	12	0	0.06	0.26601
GO:0019692	deoxyribose phosphate metabolic process	12	0	0.06	0.26601
GO:0009200	deoxyribonucleoside triphosphate metabolic process	12	0	0.06	0.26601
GO:0009937	regulation of gibberellic acid mediated signaling pathway	16	0	0.08	0.26624
GO:0006743	ubiquinone metabolic process	19	0	0.1	0.26672
GO:0006744	ubiquinone biosynthetic process	19	0	0.1	0.26672
GO:0048278	vesicle docking	89	0	0.46	0.2692
GO:0006212	uracil catabolic process	6	0	0.03	0.2702
GO:0006208	pyrimidine nucleobase catabolic process	6	0	0.03	0.2702
GO:0006487	protein N-linked glycosylation	57	0	0.3	0.27241
GO:0009211	pyrimidine deoxyribonucleoside triphosphate metabolic process	7	0	0.04	0.27242
GO:0006400	tRNA modification	125	2	0.65	0.27333
GO:0043623	cellular protein complex assembly	392	0	2.05	0.2734
GO:0010304	PSII associated light-harvesting complex II catabolic process	16	0	0.08	0.27367
GO:0031057	negative regulation of histone modification	13	0	0.07	0.27374
GO:2000757	negative regulation of peptidyl-lysine acetylation	13	0	0.07	0.27374
GO:1901984	negative regulation of protein acetylation	13	0	0.07	0.27374
GO:0035067	negative regulation of histone acetylation	13	0	0.07	0.27374
GO:1903309	negative regulation of chromatin modification	13	0	0.07	0.27374
GO:0019058	viral life cycle	13	0	0.07	0.27391
GO:0019079	viral genome replication	13	0	0.07	0.27391
GO:0046786	viral replication complex formation and maintenance	13	0	0.07	0.27391
GO:0022411	cellular component disassembly	74	0	0.39	0.2749
GO:0006527	arginine catabolic process	6	0	0.03	0.27541
GO:0046184	aldehyde biosynthetic process	18	0	0.09	0.27594
GO:0009959	negative gravitropism	9	0	0.05	0.27595
GO:0009116	nucleoside metabolic process	808	2	4.22	0.27608
GO:0006006	glucose metabolic process	93	2	0.49	0.27669
GO:1900109	regulation of histone H3-K9 dimethylation	6	0	0.03	0.27716
GO:0051574	positive regulation of histone H3-K9 methylation	6	0	0.03	0.27716
GO:0031062	positive regulation of histone methylation	6	0	0.03	0.27716
GO:0018027	peptidyl-lysine dimethylation	6	0	0.03	0.27716
GO:0036123	histone H3-K9 dimethylation	6	0	0.03	0.27716
GO:1900111	positive regulation of histone H3-K9 dimethylation	6	0	0.03	0.27716
GO:1901700	response to oxygen-containing compound	850	8	4.44	0.27844
GO:0006750	glutathione biosynthetic process	6	0	0.03	0.27867
GO:0019184	nonribosomal peptide biosynthetic process	6	0	0.03	0.27867
GO:0044070	regulation of anion transport	7	0	0.04	0.27938
GO:0016075	rRNA catabolic process	21	1	0.11	0.27989
GO:0002683	negative regulation of immune system process	14	0	0.07	0.28028
GO:0006353	DNA-templated transcription, termination	13	0	0.07	0.28159
GO:0044205	'de novo' UMP biosynthetic process	7	0	0.04	0.28186
GO:0015980	energy derivation by oxidation of organic compounds	373	1	1.95	0.28292
GO:0042327	positive regulation of phosphorylation	52	0	0.27	0.28319
GO:0001934	positive regulation of protein phosphorylation	52	0	0.27	0.28319
GO:0010562	positive regulation of phosphorus metabolic process	52	0	0.27	0.28319
GO:0045937	positive regulation of phosphate metabolic process	52	0	0.27	0.28319
GO:0007067	mitotic nuclear division	95	0	0.5	0.28328
GO:0071479	cellular response to ionizing radiation	8	1	0.04	0.2833
GO:0030154	cell differentiation	253	1	1.32	0.28343
GO:0016998	cell wall macromolecule catabolic process	43	0	0.22	0.28354
GO:0032984	macromolecular complex disassembly	73	0	0.38	0.28402
GO:0009809	lignin biosynthetic process	49	0	0.26	0.28433
GO:0015706	nitrate transport	15	0	0.08	0.28451
GO:0006644	phospholipid metabolic process	252	1	1.32	0.28559
GO:0042493	response to drug	133	0	0.69	0.28658
GO:0006855	drug transmembrane transport	133	0	0.69	0.28658
GO:0015893	drug transport	133	0	0.69	0.28658
GO:0006898	receptor-mediated endocytosis	17	0	0.09	0.2867
GO:0006900	membrane budding	52	0	0.27	0.28678
GO:0009310	amine catabolic process	11	0	0.06	0.28797
GO:0042402	cellular biogenic amine catabolic process	11	0	0.06	0.28797
GO:0009856	pollination	130	0	0.68	0.28884
GO:0044706	multi-multicellular organism process	130	0	0.68	0.28884
GO:1902456	regulation of stomatal opening	10	0	0.05	0.28982
GO:1990069	stomatal opening	10	0	0.05	0.28982
GO:0009813	flavonoid biosynthetic process	229	3	1.2	0.29118
GO:0030166	proteoglycan biosynthetic process	8	0	0.04	0.29143
GO:0030201	heparan sulfate proteoglycan metabolic process	8	0	0.04	0.29143
GO:0015012	heparan sulfate proteoglycan biosynthetic process	8	0	0.04	0.29143
GO:0042908	xenobiotic transport	9	0	0.05	0.29267
GO:0042593	glucose homeostasis	12	0	0.06	0.2933
GO:0001678	cellular glucose homeostasis	12	0	0.06	0.2933
GO:0006376	mRNA splice site selection	13	0	0.07	0.29384
GO:0042814	monopolar cell growth	10	0	0.05	0.29394
GO:0000055	ribosomal large subunit export from nucleus	7	0	0.04	0.29429
GO:0046621	negative regulation of organ growth	9	0	0.05	0.29475
GO:0072525	pyridine-containing compound biosynthetic process	43	0	0.22	0.29478
GO:0032447	protein urmylation	7	0	0.04	0.295
GO:0006612	protein targeting to membrane	42	0	0.22	0.29513
GO:0022904	respiratory electron transport chain	202	0	1.05	0.29594
GO:0042158	lipoprotein biosynthetic process	60	0	0.31	0.29704
GO:0006497	protein lipidation	60	0	0.31	0.29704
GO:1901071	glucosamine-containing compound metabolic process	39	0	0.2	0.29738
GO:1901072	glucosamine-containing compound catabolic process	39	0	0.2	0.29738
GO:0046348	amino sugar catabolic process	39	0	0.2	0.29738
GO:0006026	aminoglycan catabolic process	39	0	0.2	0.29738
GO:0006030	chitin metabolic process	39	0	0.2	0.29738
GO:0006032	chitin catabolic process	39	0	0.2	0.29738
GO:0022900	electron transport chain	403	0	2.1	0.29772
GO:0006402	mRNA catabolic process	101	1	0.53	0.29779
GO:0006573	valine metabolic process	17	0	0.09	0.29785
GO:1901564	organonitrogen compound metabolic process	2278	9	11.89	0.29859
GO:0042126	nitrate metabolic process	8	0	0.04	0.29861
GO:0042128	nitrate assimilation	8	0	0.04	0.29861
GO:2001057	reactive nitrogen species metabolic process	8	0	0.04	0.29861
GO:0043269	regulation of ion transport	22	0	0.11	0.29863
GO:0010053	root epidermal cell differentiation	35	0	0.18	0.29869
GO:0035266	meristem growth	28	0	0.15	0.29979
GO:0009416	response to light stimulus	303	3	1.58	0.30107
GO:0051258	protein polymerization	54	0	0.28	0.30214
GO:0006998	nuclear envelope organization	7	0	0.04	0.30225
GO:0031468	nuclear envelope reassembly	7	0	0.04	0.30225
GO:0006570	tyrosine metabolic process	11	1	0.06	0.30272
GO:0019217	regulation of fatty acid metabolic process	15	0	0.08	0.30279
GO:0009696	salicylic acid metabolic process	7	0	0.04	0.30357
GO:0034655	nucleobase-containing compound catabolic process	299	1	1.56	0.30495
GO:0043572	plastid fission	28	0	0.15	0.3053
GO:0010020	chloroplast fission	28	0	0.15	0.3053
GO:0046471	phosphatidylglycerol metabolic process	10	0	0.05	0.30534
GO:0006655	phosphatidylglycerol biosynthetic process	10	0	0.05	0.30534
GO:0065002	intracellular protein transmembrane transport	103	2	0.54	0.30586
GO:0006505	GPI anchor metabolic process	38	0	0.2	0.30819
GO:0006506	GPI anchor biosynthetic process	38	0	0.2	0.30819
GO:0046907	intracellular transport	874	3	4.56	0.30879
GO:0010345	suberin biosynthetic process	13	0	0.07	0.30883
GO:0009395	phospholipid catabolic process	21	0	0.11	0.30894
GO:0051188	cofactor biosynthetic process	271	1	1.41	0.30913
GO:0009065	glutamine family amino acid catabolic process	13	0	0.07	0.30932
GO:0045931	positive regulation of mitotic cell cycle	7	0	0.04	0.30936
GO:0009740	gibberellic acid mediated signaling pathway	39	0	0.2	0.30961
GO:0015977	carbon fixation	54	2	0.28	0.31083
GO:0042537	benzene-containing compound metabolic process	32	0	0.17	0.31084
GO:0008299	isoprenoid biosynthetic process	198	0	1.03	0.3112
GO:0019222	regulation of metabolic process	3157	21	16.48	0.31178
GO:0009567	double fertilization forming a zygote and endosperm	14	0	0.07	0.31221
GO:0010388	cullin deneddylation	15	0	0.08	0.31265
GO:0000338	protein deneddylation	15	0	0.08	0.31265
GO:0009314	response to radiation	332	4	1.73	0.3127
GO:0071470	cellular response to osmotic stress	7	2	0.04	0.31536
GO:0043207	response to external biotic stimulus	285	3	1.49	0.31612
GO:0051707	response to other organism	285	3	1.49	0.31612
GO:0042221	response to chemical	1691	8	8.83	0.31618
GO:0046654	tetrahydrofolate biosynthetic process	8	0	0.04	0.31642
GO:0043412	macromolecule modification	3928	14	20.5	0.31655
GO:0010109	regulation of photosynthesis	25	0	0.13	0.31693
GO:0006974	cellular response to DNA damage stimulus	355	1	1.85	0.31819
GO:0000041	transition metal ion transport	101	1	0.53	0.31862
GO:0008645	hexose transport	52	0	0.27	0.31901
GO:0009073	aromatic amino acid family biosynthetic process	76	1	0.4	0.31917
GO:0043044	ATP-dependent chromatin remodeling	10	0	0.05	0.31999
GO:0031056	regulation of histone modification	30	0	0.16	0.32038
GO:0046949	fatty-acyl-CoA biosynthetic process	28	0	0.15	0.32118
GO:0044703	multi-organism reproductive process	181	0	0.94	0.32154
GO:0009558	embryo sac cellularization	6	0	0.03	0.32289
GO:0007349	cellularization	6	0	0.03	0.32289
GO:0009064	glutamine family amino acid metabolic process	128	1	0.67	0.32308
GO:0043241	protein complex disassembly	69	0	0.36	0.32329
GO:0072593	reactive oxygen species metabolic process	241	5	1.26	0.32397
GO:0072330	monocarboxylic acid biosynthetic process	355	2	1.85	0.32445
GO:2000038	regulation of stomatal complex development	6	0	0.03	0.32499
GO:0010143	cutin biosynthetic process	27	0	0.14	0.32519
GO:0007051	spindle organization	54	0	0.28	0.32523
GO:0072599	establishment of protein localization to endoplasmic reticulum	32	0	0.17	0.32554
GO:0045047	protein targeting to ER	32	0	0.17	0.32554
GO:0071555	cell wall organization	550	3	2.87	0.32665
GO:0042023	DNA endoreduplication	22	0	0.11	0.32672
GO:0019243	methylglyoxal catabolic process to D-lactate	6	0	0.03	0.32682
GO:0006089	lactate metabolic process	6	0	0.03	0.32682
GO:0048194	Golgi vesicle budding	15	0	0.08	0.32736
GO:0050789	regulation of biological process	5123	26	26.74	0.3285
GO:1901068	guanosine-containing compound metabolic process	161	0	0.84	0.32898
GO:0009164	nucleoside catabolic process	143	0	0.75	0.32914
GO:0008295	spermidine biosynthetic process	17	0	0.09	0.32922
GO:0005975	carbohydrate metabolic process	1902	16	9.93	0.32938
GO:2000242	negative regulation of reproductive process	21	0	0.11	0.32984
GO:0007098	centrosome cycle	20	0	0.1	0.33004
GO:0051297	centrosome organization	20	0	0.1	0.33004
GO:0032196	transposition	18	0	0.09	0.33037
GO:0006825	copper ion transport	22	0	0.11	0.33058
GO:1901293	nucleoside phosphate biosynthetic process	461	2	2.41	0.33076
GO:0019632	shikimate metabolic process	11	0	0.06	0.3309
GO:0044283	small molecule biosynthetic process	951	5	4.96	0.33092
GO:0009269	response to desiccation	16	0	0.08	0.33174
GO:0000470	maturation of LSU-rRNA	77	0	0.4	0.33225
GO:0002128	tRNA nucleoside ribose methylation	6	0	0.03	0.33274
GO:0010033	response to organic substance	1086	3	5.67	0.3335
GO:0009199	ribonucleoside triphosphate metabolic process	605	2	3.16	0.33408
GO:0031058	positive regulation of histone modification	21	0	0.11	0.33426
GO:1903310	positive regulation of chromatin modification	21	0	0.11	0.33426
GO:0032787	monocarboxylic acid metabolic process	838	3	4.37	0.33426
GO:0070925	organelle assembly	236	0	1.23	0.33458
GO:0048638	regulation of developmental growth	41	0	0.21	0.33604
GO:0006793	phosphorus metabolic process	4177	15	21.8	0.33652
GO:0001666	response to hypoxia	16	0	0.08	0.33744
GO:0036293	response to decreased oxygen levels	16	0	0.08	0.33744
GO:0009590	detection of gravity	6	0	0.03	0.33758
GO:0015716	organic phosphonate transport	7	0	0.04	0.33793
GO:0097502	mannosylation	23	0	0.12	0.33802
GO:0034308	primary alcohol metabolic process	11	0	0.06	0.33823
GO:0016925	protein sumoylation	24	0	0.13	0.33878
GO:0044743	intracellular protein transmembrane import	101	2	0.53	0.33947
GO:0097031	mitochondrial respiratory chain complex I biogenesis	9	0	0.05	0.33961
GO:0010941	regulation of cell death	49	1	0.26	0.34043
GO:0034067	protein localization to Golgi apparatus	10	0	0.05	0.34044
GO:0017148	negative regulation of translation	18	0	0.09	0.3406
GO:0009657	plastid organization	216	0	1.13	0.34067
GO:0071482	cellular response to light stimulus	48	2	0.25	0.34074
GO:1901607	alpha-amino acid biosynthetic process	342	2	1.78	0.34082
GO:0046083	adenine metabolic process	13	0	0.07	0.34161
GO:0046084	adenine biosynthetic process	13	0	0.07	0.34161
GO:0009110	vitamin biosynthetic process	74	1	0.39	0.34201
GO:0006450	regulation of translational fidelity	52	0	0.27	0.34216
GO:0009259	ribonucleotide metabolic process	731	2	3.82	0.34253
GO:0019693	ribose phosphate metabolic process	731	2	3.82	0.34253
GO:0008284	positive regulation of cell proliferation	13	0	0.07	0.34352
GO:0043328	protein targeting to vacuole involved in ubiquitin-dependent protein catabolic process via the multivesicular body sorting pathway	11	0	0.06	0.34388
GO:0032511	late endosome to vacuole transport via multivesicular body sorting pathway	11	0	0.06	0.34388
GO:0043162	ubiquitin-dependent protein catabolic process via the multivesicular body sorting pathway	11	0	0.06	0.34388
GO:0043624	cellular protein complex disassembly	67	0	0.35	0.34468
GO:0006399	tRNA metabolic process	308	3	1.61	0.34743
GO:0006546	glycine catabolic process	13	0	0.07	0.34841
GO:0010029	regulation of seed germination	31	2	0.16	0.34991
GO:0030198	extracellular matrix organization	43	0	0.22	0.34992
GO:0071668	plant-type cell wall assembly	43	0	0.22	0.34992
GO:0070726	cell wall assembly	43	0	0.22	0.34992
GO:0043062	extracellular structure organization	43	0	0.22	0.34992
GO:0010215	cellulose microfibril organization	43	0	0.22	0.34992
GO:0000154	rRNA modification	48	2	0.25	0.35107
GO:0006152	purine nucleoside catabolic process	140	0	0.73	0.35144
GO:0090333	regulation of stomatal closure	6	0	0.03	0.35244
GO:0046185	aldehyde catabolic process	9	0	0.05	0.35246
GO:0048285	organelle fission	200	1	1.04	0.35261
GO:0006753	nucleoside phosphate metabolic process	953	2	4.97	0.35325
GO:0009845	seed germination	73	2	0.38	0.35325
GO:0051171	regulation of nitrogen compound metabolic process	2251	15	11.75	0.3536
GO:1902275	regulation of chromatin organization	32	0	0.17	0.35438
GO:1903308	regulation of chromatin modification	32	0	0.17	0.35438
GO:2001251	negative regulation of chromosome organization	16	0	0.08	0.35476
GO:0006397	mRNA processing	419	3	2.19	0.35551
GO:0006913	nucleocytoplasmic transport	162	1	0.85	0.3557
GO:0051169	nuclear transport	162	1	0.85	0.3557
GO:0010286	heat acclimation	15	0	0.08	0.35606
GO:0097428	protein maturation by iron-sulfur cluster transfer	12	0	0.06	0.35612
GO:0042398	cellular modified amino acid biosynthetic process	60	0	0.31	0.3564
GO:0042436	indole-containing compound catabolic process	6	0	0.03	0.35801
GO:0006569	tryptophan catabolic process	6	0	0.03	0.35801
GO:0019441	tryptophan catabolic process to kynurenine	6	0	0.03	0.35801
GO:0046218	indolalkylamine catabolic process	6	0	0.03	0.35801
GO:0070189	kynurenine metabolic process	6	0	0.03	0.35801
GO:0052482	defense response by cell wall thickening	10	0	0.05	0.35902
GO:0052542	defense response by callose deposition	10	0	0.05	0.35902
GO:0052544	defense response by callose deposition in cell wall	10	0	0.05	0.35902
GO:0007076	mitotic chromosome condensation	13	0	0.07	0.35904
GO:0000291	nuclear-transcribed mRNA catabolic process, exonucleolytic	20	1	0.1	0.3591
GO:0006281	DNA repair	335	1	1.75	0.3593
GO:0060236	regulation of mitotic spindle organization	8	0	0.04	0.35946
GO:0090224	regulation of spindle organization	8	0	0.04	0.35946
GO:0042743	hydrogen peroxide metabolic process	181	0	0.94	0.35946
GO:0010337	regulation of salicylic acid metabolic process	6	0	0.03	0.35994
GO:0009697	salicylic acid biosynthetic process	6	0	0.03	0.35994
GO:0006914	autophagy	71	0	0.37	0.35995
GO:0000160	phosphorelay signal transduction system	152	2	0.79	0.36044
GO:0051193	regulation of cofactor metabolic process	8	0	0.04	0.36069
GO:0045338	farnesyl diphosphate metabolic process	10	0	0.05	0.36112
GO:0009889	regulation of biosynthetic process	2234	15	11.66	0.3613
GO:0006575	cellular modified amino acid metabolic process	215	0	1.12	0.36263
GO:0043137	DNA replication, removal of RNA primer	6	0	0.03	0.36295
GO:0000904	cell morphogenesis involved in differentiation	67	0	0.35	0.36409
GO:0009812	flavonoid metabolic process	258	3	1.35	0.36431
GO:0008654	phospholipid biosynthetic process	120	0	0.63	0.36476
GO:0001558	regulation of cell growth	35	0	0.18	0.36482
GO:0006364	rRNA processing	350	5	1.83	0.36482
GO:0014070	response to organic cyclic compound	144	0	0.75	0.36483
GO:0051347	positive regulation of transferase activity	54	0	0.28	0.36503
GO:0048646	anatomical structure formation involved in morphogenesis	122	0	0.64	0.36505
GO:0048511	rhythmic process	22	0	0.11	0.36513
GO:0007623	circadian rhythm	22	0	0.11	0.36513
GO:0044036	cell wall macromolecule metabolic process	167	0	0.87	0.36524
GO:0007186	G-protein coupled receptor signaling pathway	32	0	0.17	0.36528
GO:1900618	regulation of shoot system morphogenesis	6	0	0.03	0.36685
GO:0090116	C-5 methylation of cytosine	7	0	0.04	0.36704
GO:0032776	DNA methylation on cytosine	7	0	0.04	0.36704
GO:0072523	purine-containing compound catabolic process	160	0	0.84	0.36707
GO:0010212	response to ionizing radiation	31	1	0.16	0.36715
GO:0018195	peptidyl-arginine modification	15	0	0.08	0.36784
GO:0018216	peptidyl-arginine methylation	15	0	0.08	0.36784
GO:0055067	monovalent inorganic cation homeostasis	93	0	0.49	0.3681
GO:0019953	sexual reproduction	56	0	0.29	0.36932
GO:0045944	positive regulation of transcription from RNA polymerase II promoter	106	0	0.55	0.36949
GO:1902589	single-organism organelle organization	859	5	4.48	0.36981
GO:0043933	macromolecular complex subunit organization	1090	2	5.69	0.37031
GO:0010410	hemicellulose metabolic process	113	0	0.59	0.37058
GO:0006352	DNA-templated transcription, initiation	123	0	0.64	0.37062
GO:0044419	interspecies interaction between organisms	36	0	0.19	0.37064
GO:0044403	symbiosis, encompassing mutualism through parasitism	36	0	0.19	0.37064
GO:0009938	negative regulation of gibberellic acid mediated signaling pathway	12	0	0.06	0.3707
GO:0045229	external encapsulating structure organization	588	3	3.07	0.37201
GO:0090332	stomatal closure	13	0	0.07	0.37207
GO:0030004	cellular monovalent inorganic cation homeostasis	54	0	0.28	0.37294
GO:0016246	RNA interference	34	0	0.18	0.37345
GO:0030422	production of siRNA involved in RNA interference	34	0	0.18	0.37345
GO:0019538	protein metabolic process	6886	23	35.94	0.37367
GO:0016572	histone phosphorylation	9	0	0.05	0.3738
GO:0051259	protein oligomerization	32	0	0.17	0.37406
GO:0009799	specification of symmetry	8	1	0.04	0.3744
GO:0034762	regulation of transmembrane transport	14	0	0.07	0.37527
GO:0034765	regulation of ion transmembrane transport	14	0	0.07	0.37527
GO:0031326	regulation of cellular biosynthetic process	2230	15	11.64	0.37532
GO:0010363	regulation of plant-type hypersensitive response	8	0	0.04	0.37657
GO:0061640	cytoskeleton-dependent cytokinesis	155	0	0.81	0.37686
GO:0006396	RNA processing	1136	12	5.93	0.37718
GO:0065003	macromolecular complex assembly	945	2	4.93	0.37785
GO:0006022	aminoglycan metabolic process	48	0	0.25	0.37811
GO:1902531	regulation of intracellular signal transduction	57	0	0.3	0.37898
GO:0051172	negative regulation of nitrogen compound metabolic process	149	1	0.78	0.37951
GO:0009169	purine ribonucleoside monophosphate catabolic process	6	0	0.03	0.37975
GO:0009158	ribonucleoside monophosphate catabolic process	6	0	0.03	0.37975
GO:0009125	nucleoside monophosphate catabolic process	6	0	0.03	0.37975
GO:0009128	purine nucleoside monophosphate catabolic process	6	0	0.03	0.37975
GO:0006200	ATP catabolic process	6	0	0.03	0.37975
GO:0043462	regulation of ATPase activity	6	0	0.03	0.37975
GO:1903289	regulation of ATP catabolic process	6	0	0.03	0.37975
GO:0048598	embryonic morphogenesis	8	2	0.04	0.37983
GO:0032543	mitochondrial translation	64	0	0.33	0.38015
GO:0048280	vesicle fusion with Golgi apparatus	16	0	0.08	0.38023
GO:0016180	snRNA processing	16	1	0.08	0.38029
GO:0009606	tropism	40	0	0.21	0.38061
GO:0048581	negative regulation of post-embryonic development	45	0	0.23	0.38091
GO:0019419	sulfate reduction	9	0	0.05	0.38092
GO:0006560	proline metabolic process	21	0	0.11	0.38098
GO:0043066	negative regulation of apoptotic process	6	0	0.03	0.38105
GO:0010476	gibberellin mediated signaling pathway	41	0	0.21	0.38132
GO:0071370	cellular response to gibberellin stimulus	41	0	0.21	0.38132
GO:0009102	biotin biosynthetic process	8	0	0.04	0.38167
GO:0006768	biotin metabolic process	8	0	0.04	0.38167
GO:0051026	chiasma assembly	6	1	0.03	0.38214
GO:0072529	pyrimidine-containing compound catabolic process	11	0	0.06	0.38245
GO:0006571	tyrosine biosynthetic process	7	1	0.04	0.38273
GO:0051053	negative regulation of DNA metabolic process	17	0	0.09	0.38317
GO:0006613	cotranslational protein targeting to membrane	31	0	0.16	0.3834
GO:0006614	SRP-dependent cotranslational protein targeting to membrane	31	0	0.16	0.3834
GO:0032504	multicellular organism reproduction	74	1	0.39	0.38348
GO:0006890	retrograde vesicle-mediated transport, Golgi to ER	43	0	0.22	0.38366
GO:2000033	regulation of seed dormancy process	9	0	0.05	0.38442
GO:0032886	regulation of microtubule-based process	15	0	0.08	0.38483
GO:0008614	pyridoxine metabolic process	6	0	0.03	0.38534
GO:0009808	lignin metabolic process	67	0	0.35	0.38535
GO:0009098	leucine biosynthetic process	10	0	0.05	0.38572
GO:0071806	protein transmembrane transport	126	2	0.66	0.38574
GO:0000028	ribosomal small subunit assembly	70	0	0.37	0.38574
GO:0010565	regulation of cellular ketone metabolic process	43	0	0.22	0.38634
GO:0045185	maintenance of protein location	32	0	0.17	0.38645
GO:0051570	regulation of histone H3-K9 methylation	8	0	0.04	0.38675
GO:0009069	serine family amino acid metabolic process	84	0	0.44	0.38677
GO:0055114	oxidation-reduction process	3445	22	17.98	0.38771
GO:0040008	regulation of growth	78	0	0.41	0.38821
GO:0070126	mitochondrial translational termination	8	0	0.04	0.38881
GO:0006814	sodium ion transport	31	0	0.16	0.38882
GO:0035434	copper ion transmembrane transport	17	0	0.09	0.38911
GO:0042558	pteridine-containing compound metabolic process	61	0	0.32	0.38954
GO:0010205	photoinhibition	11	0	0.06	0.38995
GO:0043155	negative regulation of photosynthesis, light reaction	11	0	0.06	0.38995
GO:0009263	deoxyribonucleotide biosynthetic process	15	0	0.08	0.39083
GO:0032956	regulation of actin cytoskeleton organization	35	0	0.18	0.39131
GO:0032970	regulation of actin filament-based process	35	0	0.18	0.39131
GO:0006766	vitamin metabolic process	77	1	0.4	0.39237
GO:0010468	regulation of gene expression	2376	17	12.4	0.39286
GO:0009913	epidermal cell differentiation	91	0	0.47	0.39511
GO:0030855	epithelial cell differentiation	91	0	0.47	0.39511
GO:0019318	hexose metabolic process	150	2	0.78	0.39532
GO:0070125	mitochondrial translational elongation	15	0	0.08	0.39568
GO:0010154	fruit development	312	2	1.63	0.39577
GO:0051596	methylglyoxal catabolic process	8	0	0.04	0.39577
GO:0009438	methylglyoxal metabolic process	8	0	0.04	0.39577
GO:0009165	nucleotide biosynthetic process	451	2	2.35	0.39663
GO:0005982	starch metabolic process	53	1	0.28	0.39699
GO:0006891	intra-Golgi vesicle-mediated transport	68	0	0.35	0.39717
GO:0042773	ATP synthesis coupled electron transport	180	0	0.94	0.39746
GO:0080090	regulation of primary metabolic process	2640	15	13.78	0.39765
GO:0042559	pteridine-containing compound biosynthetic process	29	0	0.15	0.39808
GO:1901642	nucleoside transmembrane transport	24	0	0.13	0.39819
GO:0000463	maturation of LSU-rRNA from tricistronic rRNA transcript (SSU-rRNA, 5.8S rRNA, LSU-rRNA)	29	0	0.15	0.3983
GO:0016122	xanthophyll metabolic process	19	0	0.1	0.39891
GO:0070887	cellular response to chemical stimulus	898	8	4.69	0.39895
GO:0009628	response to abiotic stimulus	760	6	3.97	0.39925
GO:0019284	L-methionine biosynthetic process from S-adenosylmethionine	6	0	0.03	0.39936
GO:0018904	ether metabolic process	57	0	0.3	0.3997
GO:0006662	glycerol ether metabolic process	57	0	0.3	0.3997
GO:0044804	nucleophagy	16	0	0.08	0.39978
GO:0034613	cellular protein localization	731	2	3.82	0.39989
GO:1902221	erythrose 4-phosphate/phosphoenolpyruvate family amino acid metabolic process	31	0	0.16	0.4007
GO:0006558	L-phenylalanine metabolic process	31	0	0.16	0.4007
GO:0006415	translational termination	39	0	0.2	0.40087
GO:0046487	glyoxylate metabolic process	15	0	0.08	0.40141
GO:0000819	sister chromatid segregation	37	0	0.19	0.40185
GO:2001252	positive regulation of chromosome organization	24	0	0.13	0.40237
GO:0033108	mitochondrial respiratory chain complex assembly	34	0	0.18	0.40245
GO:0046700	heterocycle catabolic process	361	1	1.88	0.40411
GO:0050776	regulation of immune response	43	0	0.22	0.40466
GO:0045088	regulation of innate immune response	43	0	0.22	0.40466
GO:0009072	aromatic amino acid family metabolic process	113	1	0.59	0.40527
GO:0046686	response to cadmium ion	17	0	0.09	0.40533
GO:0071407	cellular response to organic cyclic compound	119	0	0.62	0.4054
GO:0006886	intracellular protein transport	633	2	3.3	0.40542
GO:0022607	cellular component assembly	1115	3	5.82	0.40582
GO:0009106	lipoate metabolic process	13	0	0.07	0.40603
GO:0009107	lipoate biosynthetic process	13	0	0.07	0.40603
GO:0009249	protein lipoylation	13	0	0.07	0.40603
GO:0042726	flavin-containing compound metabolic process	23	0	0.12	0.40641
GO:0010387	COP9 signalosome assembly	6	0	0.03	0.40692
GO:0065007	biological regulation	5802	31	30.28	0.40771
GO:0009250	glucan biosynthetic process	145	1	0.76	0.40776
GO:0032879	regulation of localization	111	0	0.58	0.4078
GO:0044092	negative regulation of molecular function	263	2	1.37	0.40791
GO:0018065	protein-cofactor linkage	17	0	0.09	0.40813
GO:0060255	regulation of macromolecule metabolic process	2607	17	13.61	0.40975
GO:0009894	regulation of catabolic process	240	0	1.25	0.41066
GO:0040029	regulation of gene expression, epigenetic	139	1	0.73	0.4114
GO:0009688	abscisic acid biosynthetic process	8	0	0.04	0.41147
GO:0048868	pollen tube development	42	0	0.22	0.41161
GO:0015766	disaccharide transport	14	0	0.07	0.41186
GO:0015770	sucrose transport	14	0	0.07	0.41186
GO:0015772	oligosaccharide transport	14	0	0.07	0.41186
GO:0031146	SCF-dependent proteasomal ubiquitin-dependent protein catabolic process	44	0	0.23	0.4122
GO:0006308	DNA catabolic process	10	0	0.05	0.41232
GO:0006520	cellular amino acid metabolic process	880	4	4.59	0.41251
GO:0022412	cellular process involved in reproduction in multicellular organism	12	1	0.06	0.41421
GO:0018206	peptidyl-methionine modification	8	0	0.04	0.41469
GO:0017196	N-terminal peptidyl-methionine acetylation	8	0	0.04	0.41469
GO:0070828	heterochromatin organization	14	0	0.07	0.41533
GO:0010099	regulation of photomorphogenesis	9	0	0.05	0.41546
GO:2000030	regulation of response to red or far red light	9	0	0.05	0.41546
GO:0090351	seedling development	83	2	0.43	0.41586
GO:0019464	glycine decarboxylation via glycine cleavage system	10	0	0.05	0.41723
GO:0001510	RNA methylation	95	2	0.5	0.41729
GO:0030261	chromosome condensation	14	0	0.07	0.41798
GO:0016482	cytoplasmic transport	478	3	2.49	0.41814
GO:0000079	regulation of cyclin-dependent protein serine/threonine kinase activity	26	0	0.14	0.41907
GO:0006452	translational frameshifting	9	0	0.05	0.41931
GO:0006449	regulation of translational termination	9	0	0.05	0.41931
GO:0043243	positive regulation of protein complex disassembly	9	0	0.05	0.41931
GO:0045901	positive regulation of translational elongation	9	0	0.05	0.41931
GO:0045905	positive regulation of translational termination	9	0	0.05	0.41931
GO:0009798	axis specification	24	0	0.13	0.41933
GO:0051235	maintenance of location	92	0	0.48	0.41937
GO:0071368	cellular response to cytokinin stimulus	21	2	0.11	0.41943
GO:0009736	cytokinin-activated signaling pathway	21	2	0.11	0.41943
GO:0070932	histone H3 deacetylation	10	0	0.05	0.41967
GO:0044270	cellular nitrogen compound catabolic process	363	1	1.89	0.4211
GO:0034622	cellular macromolecular complex assembly	881	2	4.6	0.4217
GO:0016073	snRNA metabolic process	19	1	0.1	0.42241
GO:0006313	transposition, DNA-mediated	14	0	0.07	0.42261
GO:0043288	apocarotenoid metabolic process	13	0	0.07	0.42412
GO:0009396	folic acid-containing compound biosynthetic process	27	0	0.14	0.42422
GO:0009910	negative regulation of flower development	19	0	0.1	0.42546
GO:0007049	cell cycle	511	1	2.67	0.42571
GO:0009733	response to auxin	335	0	1.75	0.42654
GO:0010243	response to organonitrogen compound	7	0	0.04	0.42685
GO:0006901	vesicle coating	28	0	0.15	0.42693
GO:0009074	aromatic amino acid family catabolic process	28	0	0.15	0.42722
GO:0000480	endonucleolytic cleavage in 5'-ETS of tricistronic rRNA transcript (SSU-rRNA, 5.8S rRNA, LSU-rRNA)	6	0	0.03	0.42735
GO:0035966	response to topologically incorrect protein	21	0	0.11	0.42755
GO:0030029	actin filament-based process	77	0	0.4	0.42787
GO:0030036	actin cytoskeleton organization	77	0	0.4	0.42787
GO:0090421	embryonic meristem initiation	6	0	0.03	0.4284
GO:0030148	sphingolipid biosynthetic process	18	2	0.09	0.42881
GO:0048609	multicellular organismal reproductive process	70	0	0.37	0.42888
GO:0016570	histone modification	177	2	0.92	0.42889
GO:0051510	regulation of unidimensional cell growth	18	0	0.09	0.42899
GO:0009886	post-embryonic morphogenesis	79	0	0.41	0.42904
GO:0071027	nuclear RNA surveillance	14	1	0.07	0.42917
GO:0071028	nuclear mRNA surveillance	14	1	0.07	0.42917
GO:0006897	endocytosis	72	0	0.38	0.42951
GO:0015689	molybdate ion transport	11	0	0.06	0.43031
GO:1901565	organonitrogen compound catabolic process	353	0	1.84	0.43066
GO:0009644	response to high light intensity	18	2	0.09	0.43087
GO:0071033	nuclear retention of pre-mRNA at the site of transcription	7	1	0.04	0.43089
GO:0008298	intracellular mRNA localization	7	1	0.04	0.43089
GO:0016560	protein import into peroxisome matrix, docking	7	0	0.04	0.431
GO:0022615	protein to membrane docking	7	0	0.04	0.431
GO:0048316	seed development	267	1	1.39	0.43125
GO:0048825	cotyledon development	9	0	0.05	0.43161
GO:0009686	gibberellin biosynthetic process	23	0	0.12	0.43163
GO:0016310	phosphorylation	2646	7	13.81	0.43196
GO:0051567	histone H3-K9 methylation	9	0	0.05	0.43217
GO:0000184	nuclear-transcribed mRNA catabolic process, nonsense-mediated decay	19	0	0.1	0.43312
GO:0018344	protein geranylgeranylation	9	0	0.05	0.4332
GO:0022604	regulation of cell morphogenesis	58	0	0.3	0.43376
GO:0000059	protein import into nucleus, docking	30	0	0.16	0.43417
GO:0045116	protein neddylation	20	0	0.1	0.43421
GO:0019219	regulation of nucleobase-containing compound metabolic process	2229	15	11.63	0.4343
GO:0008360	regulation of cell shape	40	0	0.21	0.43446
GO:0043043	peptide biosynthetic process	9	0	0.05	0.43449
GO:0033014	tetrapyrrole biosynthetic process	81	1	0.42	0.43497
GO:2000112	regulation of cellular macromolecule biosynthetic process	2197	15	11.47	0.43649
GO:0010556	regulation of macromolecule biosynthetic process	2197	15	11.47	0.43649
GO:0040007	growth	285	0	1.49	0.43676
GO:0009262	deoxyribonucleotide metabolic process	18	0	0.09	0.43739
GO:0044786	cell cycle DNA replication	31	0	0.16	0.43755
GO:0043405	regulation of MAP kinase activity	15	0	0.08	0.43773
GO:0006298	mismatch repair	24	0	0.13	0.43806
GO:0045333	cellular respiration	337	0	1.76	0.43925
GO:0000707	meiotic DNA recombinase assembly	6	0	0.03	0.44011
GO:0006355	regulation of transcription, DNA-templated	2017	15	10.53	0.44022
GO:2001141	regulation of RNA biosynthetic process	2017	15	10.53	0.44022
GO:0009583	detection of light stimulus	20	0	0.1	0.44061
GO:0010228	vegetative to reproductive phase transition of meristem	91	0	0.47	0.44066
GO:0016569	covalent chromatin modification	186	2	0.97	0.44123
GO:0098542	defense response to other organism	242	3	1.26	0.44143
GO:0035384	thioester biosynthetic process	43	0	0.22	0.44196
GO:0071616	acyl-CoA biosynthetic process	43	0	0.22	0.44196
GO:1903046	meiotic cell cycle process	74	1	0.39	0.44212
GO:0012501	programmed cell death	92	2	0.48	0.44216
GO:0006040	amino sugar metabolic process	64	0	0.33	0.44237
GO:0009741	response to brassinosteroid	55	0	0.29	0.44365
GO:0010586	miRNA metabolic process	7	0	0.04	0.44394
GO:0070727	cellular macromolecule localization	750	3	3.91	0.44492
GO:0045087	innate immune response	147	2	0.77	0.44542
GO:0018393	internal peptidyl-lysine acetylation	65	1	0.34	0.44629
GO:0018394	peptidyl-lysine acetylation	65	1	0.34	0.44629
GO:0016573	histone acetylation	65	1	0.34	0.44629
GO:0009698	phenylpropanoid metabolic process	154	0	0.8	0.44704
GO:0046283	anthocyanin-containing compound metabolic process	20	1	0.1	0.44725
GO:1902241	copal-8-ol diphosphate(3-) metabolic process	10	0	0.05	0.4474
GO:0016123	xanthophyll biosynthetic process	13	0	0.07	0.44797
GO:1902626	assembly of large subunit precursor of preribosome	11	0	0.06	0.44841
GO:0006448	regulation of translational elongation	63	0	0.33	0.44853
GO:0006629	lipid metabolic process	1276	5	6.66	0.44859
GO:1901361	organic cyclic compound catabolic process	432	1	2.25	0.44863
GO:1901136	carbohydrate derivative catabolic process	212	0	1.11	0.44878
GO:0016143	S-glycoside metabolic process	25	0	0.13	0.4498
GO:0019760	glucosinolate metabolic process	25	0	0.13	0.4498
GO:0019757	glycosinolate metabolic process	25	0	0.13	0.4498
GO:0044208	'de novo' AMP biosynthetic process	8	0	0.04	0.45021
GO:0000466	maturation of 5.8S rRNA from tricistronic rRNA transcript (SSU-rRNA, 5.8S rRNA, LSU-rRNA)	30	1	0.16	0.45095
GO:0009832	plant-type cell wall biogenesis	110	0	0.57	0.45096
GO:0009584	detection of visible light	10	0	0.05	0.45099
GO:0061024	membrane organization	362	1	1.89	0.45127
GO:0045934	negative regulation of nucleobase-containing compound metabolic process	143	1	0.75	0.45148
GO:0046417	chorismate metabolic process	23	0	0.12	0.4518
GO:0006650	glycerophospholipid metabolic process	189	1	0.99	0.4522
GO:0046033	AMP metabolic process	12	0	0.06	0.45287
GO:0006167	AMP biosynthetic process	12	0	0.06	0.45287
GO:0009615	response to virus	29	0	0.15	0.45297
GO:0008033	tRNA processing	186	2	0.97	0.45313
GO:0031118	rRNA pseudouridine synthesis	8	0	0.04	0.45364
GO:0009067	aspartate family amino acid biosynthetic process	103	1	0.54	0.45368
GO:0007004	telomere maintenance via telomerase	9	0	0.05	0.45426
GO:0010833	telomere maintenance via telomere lengthening	9	0	0.05	0.45426
GO:0001522	pseudouridine synthesis	35	0	0.18	0.45472
GO:0035435	phosphate ion transmembrane transport	6	0	0.03	0.45494
GO:0045995	regulation of embryonic development	9	0	0.05	0.45535
GO:0043628	ncRNA 3'-end processing	28	1	0.15	0.45546
GO:0008216	spermidine metabolic process	19	0	0.1	0.45671
GO:0015031	protein transport	821	2	4.28	0.45734
GO:0046486	glycerolipid metabolic process	223	1	1.16	0.45792
GO:0034620	cellular response to unfolded protein	9	0	0.05	0.45856
GO:0045184	establishment of protein localization	839	2	4.38	0.45916
GO:0009992	cellular water homeostasis	57	2	0.3	0.45941
GO:0000288	nuclear-transcribed mRNA catabolic process, deadenylation-dependent decay	47	1	0.25	0.45962
GO:0010394	homogalacturonan metabolic process	6	0	0.03	0.45967
GO:0010289	homogalacturonan biosynthetic process	6	0	0.03	0.45967
GO:0006839	mitochondrial transport	103	2	0.54	0.46025
GO:0006892	post-Golgi vesicle-mediated transport	33	0	0.17	0.46052
GO:0006465	signal peptide processing	40	0	0.21	0.46112
GO:0009231	riboflavin biosynthetic process	21	0	0.11	0.46114
GO:0042727	flavin-containing compound biosynthetic process	21	0	0.11	0.46114
GO:0006771	riboflavin metabolic process	21	0	0.11	0.46114
GO:0033037	polysaccharide localization	13	0	0.07	0.46145
GO:0052545	callose localization	13	0	0.07	0.46145
GO:0044712	single-organism catabolic process	997	0	5.2	0.46152
GO:0045682	regulation of epidermis development	7	0	0.04	0.46273
GO:0051252	regulation of RNA metabolic process	2048	15	10.69	0.46324
GO:0061572	actin filament bundle organization	7	0	0.04	0.4633
GO:0051017	actin filament bundle assembly	7	0	0.04	0.4633
GO:0035195	gene silencing by miRNA	20	0	0.1	0.46341
GO:0032465	regulation of cytokinesis	12	0	0.06	0.46384
GO:0048268	clathrin coat assembly	21	0	0.11	0.4642
GO:0031122	cytoplasmic microtubule organization	50	0	0.26	0.46479
GO:0015846	polyamine transport	8	0	0.04	0.4653
GO:0009960	endosperm development	15	0	0.08	0.4657
GO:0006863	purine nucleobase transport	7	0	0.04	0.46622
GO:0015851	nucleobase transport	7	0	0.04	0.46622
GO:0015853	adenine transport	7	0	0.04	0.46622
GO:0015854	guanine transport	7	0	0.04	0.46622
GO:1902591	single-organism membrane budding	31	0	0.16	0.46655
GO:0030490	maturation of SSU-rRNA	114	1	0.59	0.46675
GO:0045491	xylan metabolic process	50	0	0.26	0.46686
GO:0006790	sulfur compound metabolic process	445	0	2.32	0.46716
GO:0034661	ncRNA catabolic process	23	1	0.12	0.46754
GO:0009900	dehiscence	14	0	0.07	0.46782
GO:0016072	rRNA metabolic process	355	5	1.85	0.46914
GO:0042723	thiamine-containing compound metabolic process	13	0	0.07	0.47026
GO:0006772	thiamine metabolic process	13	0	0.07	0.47026
GO:0015850	organic hydroxy compound transport	65	2	0.34	0.47054
GO:0050790	regulation of catalytic activity	649	4	3.39	0.47201
GO:0031060	regulation of histone methylation	10	0	0.05	0.4723
GO:0019722	calcium-mediated signaling	24	0	0.13	0.47248
GO:0019932	second-messenger-mediated signaling	24	0	0.13	0.47248
GO:0046113	nucleobase catabolic process	21	0	0.11	0.4728
GO:0030104	water homeostasis	60	2	0.31	0.47305
GO:0015791	polyol transport	60	2	0.31	0.47305
GO:0061512	protein localization to cilium	19	0	0.1	0.47375
GO:0019563	glycerol catabolic process	8	0	0.04	0.47442
GO:0019405	alditol catabolic process	8	0	0.04	0.47442
GO:0051701	interaction with host	22	0	0.11	0.47461
GO:0006475	internal protein amino acid acetylation	68	1	0.35	0.47461
GO:0048229	gametophyte development	204	2	1.06	0.47777
GO:0009855	determination of bilateral symmetry	6	1	0.03	0.47866
GO:0007129	synapsis	8	1	0.04	0.47915
GO:0006378	mRNA polyadenylation	17	0	0.09	0.48049
GO:0070482	response to oxygen levels	18	0	0.09	0.48103
GO:0043543	protein acylation	128	1	0.67	0.48177
GO:0015833	peptide transport	41	0	0.21	0.48232
GO:0044262	cellular carbohydrate metabolic process	525	2	2.74	0.48295
GO:0019915	lipid storage	30	0	0.16	0.48304
GO:0000447	endonucleolytic cleavage in ITS1 to separate SSU-rRNA from 5.8S rRNA and LSU-rRNA from tricistronic rRNA transcript (SSU-rRNA, 5.8S rRNA, LSU-rRNA)	14	0	0.07	0.48331
GO:0048236	plant-type spore development	10	0	0.05	0.48381
GO:0030163	protein catabolic process	923	2	4.82	0.48442
GO:0009251	glucan catabolic process	80	1	0.42	0.48449
GO:0072507	divalent inorganic cation homeostasis	37	0	0.19	0.48471
GO:0001708	cell fate specification	13	0	0.07	0.48538
GO:0090069	regulation of ribosome biogenesis	8	0	0.04	0.48576
GO:0032329	serine transport	6	0	0.03	0.48611
GO:0015825	L-serine transport	6	0	0.03	0.48611
GO:0016052	carbohydrate catabolic process	498	3	2.6	0.48647
GO:0010608	posttranscriptional regulation of gene expression	228	0	1.19	0.48654
GO:0031329	regulation of cellular catabolic process	228	0	1.19	0.48658
GO:0009891	positive regulation of biosynthetic process	233	1	1.22	0.48783
GO:0019439	aromatic compound catabolic process	421	1	2.2	0.48829
GO:0006760	folic acid-containing compound metabolic process	58	0	0.3	0.4887
GO:0010921	regulation of phosphatase activity	93	1	0.49	0.48962
GO:0044281	small molecule metabolic process	3155	10	16.47	0.49009
GO:0044042	glucan metabolic process	305	2	1.59	0.49029
GO:0070071	proton-transporting two-sector ATPase complex assembly	16	0	0.08	0.4907
GO:0008104	protein localization	920	2	4.8	0.49106
GO:0042886	amide transport	48	0	0.25	0.49146
GO:0019253	reductive pentose-phosphate cycle	37	2	0.19	0.4915
GO:0019685	photosynthesis, dark reaction	37	2	0.19	0.4915
GO:0065009	regulation of molecular function	661	4	3.45	0.4915
GO:0016049	cell growth	216	0	1.13	0.49309
GO:0044571	[2Fe-2S] cluster assembly	6	0	0.03	0.49359
GO:1900140	regulation of seedling development	35	2	0.18	0.49365
GO:0010383	cell wall polysaccharide metabolic process	123	0	0.64	0.49393
GO:0031507	heterochromatin assembly	12	0	0.06	0.49397
GO:0006357	regulation of transcription from RNA polymerase II promoter	256	1	1.34	0.49421
GO:0009685	gibberellin metabolic process	36	0	0.19	0.49431
GO:0000002	mitochondrial genome maintenance	7	0	0.04	0.49438
GO:0006720	isoprenoid metabolic process	244	0	1.27	0.4952
GO:0031327	negative regulation of cellular biosynthetic process	168	1	0.88	0.49575
GO:0009306	protein secretion	19	0	0.1	0.49643
GO:0006479	protein methylation	115	3	0.6	0.49689
GO:0008213	protein alkylation	115	3	0.6	0.49689
GO:0010015	root morphogenesis	81	2	0.42	0.49734
GO:0051336	regulation of hydrolase activity	279	1	1.46	0.49745
GO:0090068	positive regulation of cell cycle process	26	0	0.14	0.49754
GO:0043069	negative regulation of programmed cell death	18	0	0.09	0.49793
GO:0007064	mitotic sister chromatid cohesion	10	0	0.05	0.49828
GO:0016571	histone methylation	75	1	0.39	0.49894
GO:0072344	rescue of stalled ribosome	6	0	0.03	0.49923
GO:0090501	RNA phosphodiester bond hydrolysis	161	4	0.84	0.49965
GO:0000462	maturation of SSU-rRNA from tricistronic rRNA transcript (SSU-rRNA, 5.8S rRNA, LSU-rRNA)	96	1	0.5	0.50113
GO:0070507	regulation of microtubule cytoskeleton organization	12	0	0.06	0.50163
GO:0034035	purine ribonucleoside bisphosphate metabolic process	12	0	0.06	0.50186
GO:0015969	guanosine tetraphosphate metabolic process	12	0	0.06	0.50186
GO:0031570	DNA integrity checkpoint	11	0	0.06	0.50199
GO:0022414	reproductive process	745	4	3.89	0.50287
GO:0009555	pollen development	136	0	0.71	0.50318
GO:0000278	mitotic cell cycle	187	0	0.98	0.50344
GO:0000460	maturation of 5.8S rRNA	45	1	0.23	0.50512
GO:0033365	protein localization to organelle	373	2	1.95	0.50524
GO:0010019	chloroplast-nucleus signaling pathway	8	0	0.04	0.50603
GO:0009743	response to carbohydrate	40	2	0.21	0.50615
GO:0009640	photomorphogenesis	50	0	0.26	0.50617
GO:0010364	regulation of ethylene biosynthetic process	12	0	0.06	0.50649
GO:0031335	regulation of sulfur amino acid metabolic process	12	0	0.06	0.50649
GO:1900911	regulation of olefin biosynthetic process	12	0	0.06	0.50649
GO:1900908	regulation of olefin metabolic process	12	0	0.06	0.50649
GO:0006029	proteoglycan metabolic process	9	0	0.05	0.50701
GO:0046416	D-amino acid metabolic process	6	0	0.03	0.50732
GO:0006310	DNA recombination	160	1	0.84	0.50737
GO:0009827	plant-type cell wall modification	8	1	0.04	0.50805
GO:0048513	organ development	475	4	2.48	0.50807
GO:0044711	single-organism biosynthetic process	2583	14	13.48	0.5083
GO:0042793	transcription from plastid promoter	13	0	0.07	0.50859
GO:0071902	positive regulation of protein serine/threonine kinase activity	16	0	0.08	0.50976
GO:0019725	cellular homeostasis	519	4	2.71	0.51063
GO:0006388	tRNA splicing, via endonucleolytic cleavage and ligation	8	0	0.04	0.51117
GO:0006955	immune response	151	2	0.79	0.51141
GO:0006097	glyoxylate cycle	11	0	0.06	0.51208
GO:0010257	NADH dehydrogenase complex assembly	11	0	0.06	0.51237
GO:0071322	cellular response to carbohydrate stimulus	14	2	0.07	0.51238
GO:1903047	mitotic cell cycle process	169	0	0.88	0.5127
GO:0010411	xyloglucan metabolic process	63	0	0.33	0.51289
GO:0006012	galactose metabolic process	30	0	0.16	0.51341
GO:0006812	cation transport	1079	11	5.63	0.51435
GO:0043666	regulation of phosphoprotein phosphatase activity	91	1	0.47	0.51456
GO:0006473	protein acetylation	117	1	0.61	0.51518
GO:0006471	protein ADP-ribosylation	12	0	0.06	0.51578
GO:0006884	cell volume homeostasis	59	2	0.31	0.51616
GO:0043096	purine nucleobase salvage	8	0	0.04	0.51641
GO:0031323	regulation of cellular metabolic process	2711	16	14.15	0.51658
GO:0019585	glucuronate metabolic process	190	1	0.99	0.5166
GO:0052695	cellular glucuronidation	190	1	0.99	0.5166
GO:0052696	flavonoid glucuronidation	190	1	0.99	0.5166
GO:0006063	uronic acid metabolic process	190	1	0.99	0.5166
GO:1901004	ubiquinone-6 metabolic process	8	0	0.04	0.51667
GO:1901006	ubiquinone-6 biosynthetic process	8	0	0.04	0.51667
GO:0043455	regulation of secondary metabolic process	12	0	0.06	0.51689
GO:0010959	regulation of metal ion transport	7	0	0.04	0.51808
GO:0006820	anion transport	473	8	2.47	0.51922
GO:0072596	establishment of protein localization to chloroplast	21	0	0.11	0.51938
GO:0072598	protein localization to chloroplast	21	0	0.11	0.51938
GO:0045036	protein targeting to chloroplast	21	0	0.11	0.51938
GO:0044257	cellular protein catabolic process	785	2	4.1	0.51954
GO:0007062	sister chromatid cohesion	28	0	0.15	0.51989
GO:0045324	late endosome to vacuole transport	15	0	0.08	0.52044
GO:0006534	cysteine metabolic process	31	0	0.16	0.52114
GO:0007264	small GTPase mediated signal transduction	241	0	1.26	0.52136
GO:0055070	copper ion homeostasis	6	0	0.03	0.52204
GO:0044272	sulfur compound biosynthetic process	200	0	1.04	0.52214
GO:0046777	protein autophosphorylation	146	0	0.76	0.52228
GO:0010014	meristem initiation	12	0	0.06	0.5225
GO:0019748	secondary metabolic process	407	0	2.12	0.5228
GO:0006633	fatty acid biosynthetic process	269	2	1.4	0.52344
GO:0043086	negative regulation of catalytic activity	260	2	1.36	0.52384
GO:0042744	hydrogen peroxide catabolic process	170	0	0.89	0.52398
GO:0032103	positive regulation of response to external stimulus	9	0	0.05	0.524
GO:0006950	response to stress	2057	14	10.74	0.52438
GO:0036092	phosphatidylinositol-3-phosphate biosynthetic process	7	0	0.04	0.52447
GO:0046499	S-adenosylmethioninamine metabolic process	10	0	0.05	0.5247
GO:0008215	spermine metabolic process	10	0	0.05	0.5247
GO:0006597	spermine biosynthetic process	10	0	0.05	0.5247
GO:0006557	S-adenosylmethioninamine biosynthetic process	10	0	0.05	0.5247
GO:0030245	cellulose catabolic process	37	1	0.19	0.52475
GO:0043414	macromolecule methylation	237	3	1.24	0.52489
GO:0000910	cytokinesis	187	0	0.98	0.52493
GO:0009566	fertilization	16	0	0.08	0.52563
GO:2000113	negative regulation of cellular macromolecule biosynthetic process	157	1	0.82	0.52658
GO:0010558	negative regulation of macromolecule biosynthetic process	157	1	0.82	0.52658
GO:1902645	tertiary alcohol biosynthetic process	13	0	0.07	0.52664
GO:0050896	response to stimulus	4258	17	22.22	0.52776
GO:0032981	mitochondrial respiratory chain complex I assembly	7	0	0.04	0.52926
GO:0015793	glycerol transport	54	2	0.28	0.52938
GO:0033013	tetrapyrrole metabolic process	117	1	0.61	0.5302
GO:2000377	regulation of reactive oxygen species metabolic process	25	0	0.13	0.53035
GO:0010167	response to nitrate	7	0	0.04	0.53072
GO:0071367	cellular response to brassinosteroid stimulus	45	0	0.23	0.53153
GO:0071383	cellular response to steroid hormone stimulus	45	0	0.23	0.53153
GO:0048545	response to steroid hormone	45	0	0.23	0.53153
GO:0009742	brassinosteroid mediated signaling pathway	45	0	0.23	0.53153
GO:0043401	steroid hormone mediated signaling pathway	45	0	0.23	0.53153
GO:0009890	negative regulation of biosynthetic process	170	1	0.89	0.53174
GO:0006312	mitotic recombination	22	0	0.11	0.53197
GO:0051276	chromosome organization	456	6	2.38	0.53212
GO:0031328	positive regulation of cellular biosynthetic process	231	1	1.21	0.53252
GO:0002833	positive regulation of response to biotic stimulus	7	0	0.04	0.53266
GO:0043902	positive regulation of multi-organism process	7	0	0.04	0.53266
GO:0070301	cellular response to hydrogen peroxide	172	0	0.9	0.53287
GO:0006779	porphyrin-containing compound biosynthetic process	67	1	0.35	0.53296
GO:0000070	mitotic sister chromatid segregation	32	0	0.17	0.53302
GO:0006749	glutathione metabolic process	88	0	0.46	0.53306
GO:0010389	regulation of G2/M transition of mitotic cell cycle	10	0	0.05	0.53398
GO:0000086	G2/M transition of mitotic cell cycle	10	0	0.05	0.53398
GO:1902749	regulation of cell cycle G2/M phase transition	10	0	0.05	0.53398
GO:0044839	cell cycle G2/M phase transition	10	0	0.05	0.53398
GO:0007584	response to nutrient	6	0	0.03	0.53439
GO:0018105	peptidyl-serine phosphorylation	165	0	0.86	0.535
GO:0018106	peptidyl-histidine phosphorylation	24	2	0.13	0.53528
GO:0017062	respiratory chain complex III assembly	6	0	0.03	0.53551
GO:0097033	mitochondrial respiratory chain complex III biogenesis	6	0	0.03	0.53551
GO:0034551	mitochondrial respiratory chain complex III assembly	6	0	0.03	0.53551
GO:0071495	cellular response to endogenous stimulus	536	3	2.8	0.53576
GO:0032870	cellular response to hormone stimulus	536	3	2.8	0.53576
GO:0007568	aging	67	1	0.35	0.53586
GO:0000271	polysaccharide biosynthetic process	243	2	1.27	0.53592
GO:0006074	(1->3)-beta-D-glucan metabolic process	34	0	0.18	0.53633
GO:0097305	response to alcohol	388	1	2.03	0.53679
GO:0009117	nucleotide metabolic process	940	2	4.91	0.53724
GO:0044723	single-organism carbohydrate metabolic process	1029	7	5.37	0.53732
GO:0035303	regulation of dephosphorylation	94	1	0.49	0.53849
GO:0042219	cellular modified amino acid catabolic process	8	0	0.04	0.53882
GO:0009651	response to salt stress	137	0	0.72	0.53951
GO:0044088	regulation of vacuole organization	7	0	0.04	0.53968
GO:0010315	auxin efflux	18	0	0.09	0.54025
GO:0035196	production of miRNAs involved in gene silencing by miRNA	16	0	0.08	0.54052
GO:0009825	multidimensional cell growth	41	0	0.21	0.54064
GO:0000902	cell morphogenesis	206	0	1.08	0.54119
GO:0009755	hormone-mediated signaling pathway	534	3	2.79	0.54173
GO:0048235	pollen sperm cell differentiation	10	0	0.05	0.54215
GO:0046112	nucleobase biosynthetic process	47	0	0.25	0.54229
GO:0052386	cell wall thickening	12	0	0.06	0.54245
GO:0052543	callose deposition in cell wall	12	0	0.06	0.54245
GO:0015804	neutral amino acid transport	8	1	0.04	0.54325
GO:0009850	auxin metabolic process	21	0	0.11	0.54328
GO:0044802	single-organism membrane organization	323	1	1.69	0.54481
GO:1901992	positive regulation of mitotic cell cycle phase transition	8	0	0.04	0.54501
GO:1901989	positive regulation of cell cycle phase transition	8	0	0.04	0.54501
GO:0030705	cytoskeleton-dependent intracellular transport	6	0	0.03	0.54667
GO:0044767	single-organism developmental process	1536	9	8.02	0.54752
GO:0071705	nitrogen compound transport	450	5	2.35	0.54754
GO:0006474	N-terminal protein amino acid acetylation	52	0	0.27	0.54772
GO:0009943	adaxial/abaxial axis specification	13	0	0.07	0.54787
GO:0065008	regulation of biological quality	1172	8	6.12	0.54812
GO:0006563	L-serine metabolic process	51	0	0.27	0.54851
GO:0043562	cellular response to nitrogen levels	28	0	0.15	0.54877
GO:1901605	alpha-amino acid metabolic process	515	2	2.69	0.55009
GO:0030162	regulation of proteolysis	134	0	0.7	0.55056
GO:0051049	regulation of transport	95	0	0.5	0.55169
GO:0031440	regulation of mRNA 3'-end processing	6	0	0.03	0.55199
GO:0071669	plant-type cell wall organization or biogenesis	271	1	1.41	0.55299
GO:0043132	NAD transport	9	0	0.05	0.55306
GO:0042026	protein refolding	19	1	0.1	0.55444
GO:0031119	tRNA pseudouridine synthesis	7	0	0.04	0.5549
GO:0031125	rRNA 3'-end processing	22	1	0.11	0.5549
GO:1901421	positive regulation of response to alcohol	16	0	0.08	0.55531
GO:0010817	regulation of hormone levels	179	0	0.93	0.55557
GO:0010214	seed coat development	11	0	0.06	0.55654
GO:0016574	histone ubiquitination	12	0	0.06	0.55716
GO:0010090	trichome morphogenesis	33	0	0.17	0.55732
GO:0009851	auxin biosynthetic process	14	0	0.07	0.55808
GO:0050794	regulation of cellular process	4462	21	23.29	0.55837
GO:0010118	stomatal movement	45	0	0.23	0.55892
GO:0001887	selenium compound metabolic process	10	0	0.05	0.55921
GO:0048869	cellular developmental process	428	1	2.23	0.55935
GO:0009556	microsporogenesis	8	0	0.04	0.55944
GO:0006414	translational elongation	151	0	0.79	0.55959
GO:0055082	cellular chemical homeostasis	298	3	1.56	0.55987
GO:0010876	lipid localization	134	0	0.7	0.55992
GO:0032502	developmental process	1579	10	8.24	0.55999
GO:0031400	negative regulation of protein modification process	27	0	0.14	0.56034
GO:0006999	nuclear pore organization	23	0	0.12	0.5605
GO:0051094	positive regulation of developmental process	40	0	0.21	0.56071
GO:0010024	phytochromobilin biosynthetic process	6	0	0.03	0.56082
GO:0051202	phytochromobilin metabolic process	6	0	0.03	0.56082
GO:0071241	cellular response to inorganic substance	19	0	0.1	0.56117
GO:0009955	adaxial/abaxial pattern specification	16	0	0.08	0.56123
GO:0055069	zinc ion homeostasis	19	0	0.1	0.56304
GO:0033993	response to lipid	422	1	2.2	0.56309
GO:0051238	sequestering of metal ion	30	0	0.16	0.56358
GO:0009423	chorismate biosynthetic process	18	0	0.09	0.5643
GO:0009607	response to biotic stimulus	371	4	1.94	0.56473
GO:0071695	anatomical structure maturation	29	1	0.15	0.56536
GO:0009835	fruit ripening	29	1	0.15	0.56536
GO:0051130	positive regulation of cellular component organization	98	0	0.51	0.56577
GO:0006071	glycerol metabolic process	12	0	0.06	0.56687
GO:0019400	alditol metabolic process	12	0	0.06	0.56687
GO:0061077	chaperone-mediated protein folding	54	0	0.28	0.56749
GO:0016575	histone deacetylation	23	0	0.12	0.56777
GO:1901419	regulation of response to alcohol	51	0	0.27	0.56841
GO:0044264	cellular polysaccharide metabolic process	359	2	1.87	0.56889
GO:0006493	protein O-linked glycosylation	9	0	0.05	0.5689
GO:0009893	positive regulation of metabolic process	367	1	1.92	0.56902
GO:0009084	glutamine family amino acid biosynthetic process	55	0	0.29	0.56912
GO:0055081	anion homeostasis	14	0	0.07	0.5702
GO:0043967	histone H4 acetylation	7	1	0.04	0.57034
GO:0000727	double-strand break repair via break-induced replication	9	0	0.05	0.57052
GO:0019344	cysteine biosynthetic process	22	0	0.11	0.5706
GO:0006367	transcription initiation from RNA polymerase II promoter	76	0	0.4	0.57306
GO:0006751	glutathione catabolic process	6	0	0.03	0.57309
GO:0007034	vacuolar transport	81	0	0.42	0.57359
GO:0048466	androecium development	38	0	0.2	0.57409
GO:0048443	stamen development	38	0	0.2	0.57409
GO:0070084	protein initiator methionine removal	8	0	0.04	0.57472
GO:0055046	microgametogenesis	15	0	0.08	0.57534
GO:0008064	regulation of actin polymerization or depolymerization	33	0	0.17	0.57539
GO:0030832	regulation of actin filament length	33	0	0.17	0.57539
GO:0030833	regulation of actin filament polymerization	33	0	0.17	0.57539
GO:0032271	regulation of protein polymerization	33	0	0.17	0.57539
GO:0030041	actin filament polymerization	33	0	0.17	0.57539
GO:0070647	protein modification by small protein conjugation or removal	753	1	3.93	0.57622
GO:0051052	regulation of DNA metabolic process	58	0	0.3	0.57627
GO:0006109	regulation of carbohydrate metabolic process	11	0	0.06	0.57733
GO:0055086	nucleobase-containing small molecule metabolic process	1094	2	5.71	0.57824
GO:0016070	RNA metabolic process	4037	31	21.07	0.57876
GO:0010187	negative regulation of seed germination	13	0	0.07	0.57894
GO:0051128	regulation of cellular component organization	301	0	1.57	0.57953
GO:1990267	response to transition metal nanoparticle	19	0	0.1	0.57954
GO:0031053	primary miRNA processing	9	0	0.05	0.57962
GO:0009901	anther dehiscence	10	0	0.05	0.58127
GO:0051029	rRNA transport	10	0	0.05	0.58165
GO:0006407	rRNA export from nucleus	10	0	0.05	0.58165
GO:0045851	pH reduction	27	0	0.14	0.5824
GO:0007035	vacuolar acidification	27	0	0.14	0.5824
GO:0051452	intracellular pH reduction	27	0	0.14	0.5824
GO:0031365	N-terminal protein amino acid modification	67	0	0.35	0.58298
GO:0051704	multi-organism process	499	3	2.6	0.58379
GO:0007276	gamete generation	18	0	0.09	0.58413
GO:0048232	male gamete generation	18	0	0.09	0.58413
GO:0010016	shoot system morphogenesis	108	0	0.56	0.58489
GO:0016051	carbohydrate biosynthetic process	352	4	1.84	0.58541
GO:0051168	nuclear export	91	1	0.47	0.58552
GO:0006811	ion transport	1616	19	8.43	0.58585
GO:0006011	UDP-glucose metabolic process	6	0	0.03	0.5864
GO:0031325	positive regulation of cellular metabolic process	360	1	1.88	0.58682
GO:0042592	homeostatic process	730	7	3.81	0.58728
GO:0033567	DNA replication, Okazaki fragment processing	9	0	0.05	0.58744
GO:0006995	cellular response to nitrogen starvation	16	0	0.08	0.58807
GO:0030968	endoplasmic reticulum unfolded protein response	8	0	0.04	0.58849
GO:0006833	water transport	56	2	0.29	0.58852
GO:0042044	fluid transport	56	2	0.29	0.58852
GO:0009664	plant-type cell wall organization	213	1	1.11	0.58869
GO:0060260	regulation of transcription initiation from RNA polymerase II promoter	38	0	0.2	0.58891
GO:2000142	regulation of DNA-templated transcription, initiation	38	0	0.2	0.58891
GO:0048015	phosphatidylinositol-mediated signaling	6	0	0.03	0.58891
GO:0048017	inositol lipid-mediated signaling	6	0	0.03	0.58891
GO:0009790	embryo development	204	3	1.06	0.58952
GO:0048440	carpel development	35	0	0.18	0.58984
GO:0006778	porphyrin-containing compound metabolic process	107	1	0.56	0.58992
GO:0098734	macromolecule depalmitoylation	16	0	0.08	0.59017
GO:0018202	peptidyl-histidine modification	31	2	0.16	0.59052
GO:0032210	regulation of telomere maintenance via telomerase	6	0	0.03	0.59096
GO:0048584	positive regulation of response to stimulus	69	0	0.36	0.59097
GO:0051103	DNA ligation involved in DNA repair	10	0	0.05	0.59104
GO:0018958	phenol-containing compound metabolic process	14	0	0.07	0.59146
GO:0043574	peroxisomal transport	28	0	0.15	0.59217
GO:0072662	protein localization to peroxisome	28	0	0.15	0.59217
GO:0072663	establishment of protein localization to peroxisome	28	0	0.15	0.59217
GO:0006625	protein targeting to peroxisome	28	0	0.15	0.59217
GO:0097503	sialylation	7	0	0.04	0.59266
GO:0010089	xylem development	18	1	0.09	0.59347
GO:0005983	starch catabolic process	10	0	0.05	0.5943
GO:0061025	membrane fusion	172	0	0.9	0.59438
GO:0005996	monosaccharide metabolic process	369	3	1.93	0.5946
GO:0071396	cellular response to lipid	284	1	1.48	0.59496
GO:0045037	protein import into chloroplast stroma	13	0	0.07	0.59531
GO:0010207	photosystem II assembly	23	0	0.12	0.59554
GO:0015996	chlorophyll catabolic process	22	0	0.11	0.59594
GO:0046149	pigment catabolic process	22	0	0.11	0.59594
GO:0051260	protein homooligomerization	16	0	0.08	0.59631
GO:0006672	ceramide metabolic process	27	2	0.14	0.59632
GO:2000021	regulation of ion homeostasis	18	0	0.09	0.59644
GO:0010043	response to zinc ion	18	0	0.09	0.59644
GO:0016101	diterpenoid metabolic process	47	0	0.25	0.59682
GO:0034728	nucleosome organization	98	2	0.51	0.59685
GO:0031123	RNA 3'-end processing	62	1	0.32	0.59789
GO:0010035	response to inorganic substance	434	5	2.27	0.59799
GO:0097576	vacuole fusion	11	0	0.06	0.59811
GO:0000266	mitochondrial fission	8	0	0.04	0.5986
GO:0016233	telomere capping	9	0	0.05	0.5987
GO:0051603	proteolysis involved in cellular protein catabolic process	767	2	4	0.59941
GO:1901699	cellular response to nitrogen compound	44	0	0.23	0.59974
GO:0034968	histone lysine methylation	52	0	0.27	0.59995
GO:0034637	cellular carbohydrate biosynthetic process	233	1	1.22	0.60016
GO:0072503	cellular divalent inorganic cation homeostasis	26	0	0.14	0.60129
GO:0001932	regulation of protein phosphorylation	103	0	0.54	0.60138
GO:0018209	peptidyl-serine modification	168	0	0.88	0.6019
GO:0002376	immune system process	164	2	0.86	0.60191
GO:0097035	regulation of membrane lipid distribution	31	0	0.16	0.603
GO:0034204	lipid translocation	31	0	0.16	0.603
GO:0045332	phospholipid translocation	31	0	0.16	0.603
GO:0048468	cell development	106	0	0.55	0.60354
GO:0022603	regulation of anatomical structure morphogenesis	91	0	0.47	0.60386
GO:0044265	cellular macromolecule catabolic process	928	3	4.84	0.60466
GO:0009967	positive regulation of signal transduction	32	0	0.17	0.60501
GO:0023056	positive regulation of signaling	32	0	0.17	0.60501
GO:0042445	hormone metabolic process	129	0	0.67	0.6051
GO:0071103	DNA conformation change	202	4	1.05	0.60531
GO:0035268	protein mannosylation	8	0	0.04	0.60571
GO:0035269	protein O-linked mannosylation	8	0	0.04	0.60571
GO:0051650	establishment of vesicle localization	12	0	0.06	0.60625
GO:0051648	vesicle localization	12	0	0.06	0.60625
GO:0042762	regulation of sulfur metabolic process	15	0	0.08	0.6063
GO:0006879	cellular iron ion homeostasis	29	0	0.15	0.6065
GO:0042981	regulation of apoptotic process	9	0	0.05	0.60722
GO:0035335	peptidyl-tyrosine dephosphorylation	50	0	0.26	0.60885
GO:0006086	acetyl-CoA biosynthetic process from pyruvate	9	0	0.05	0.60894
GO:0006168	adenine salvage	6	0	0.03	0.60921
GO:0080135	regulation of cellular response to stress	28	0	0.15	0.60947
GO:0010557	positive regulation of macromolecule biosynthetic process	227	1	1.18	0.60987
GO:0006857	oligopeptide transport	39	0	0.2	0.61011
GO:0010052	guard cell differentiation	17	0	0.09	0.61026
GO:0006986	response to unfolded protein	18	0	0.09	0.61264
GO:0009581	detection of external stimulus	26	0	0.14	0.61318
GO:0009582	detection of abiotic stimulus	26	0	0.14	0.61318
GO:0015713	phosphoglycerate transport	7	0	0.04	0.61425
GO:0010190	cytochrome b6f complex assembly	14	0	0.07	0.61428
GO:0006643	membrane lipid metabolic process	108	2	0.56	0.61477
GO:0006073	cellular glucan metabolic process	288	2	1.5	0.61514
GO:0019860	uracil metabolic process	8	0	0.04	0.61558
GO:0042343	indole glucosinolate metabolic process	11	0	0.06	0.61608
GO:0006366	transcription from RNA polymerase II promoter	378	1	1.97	0.61633
GO:0016265	death	116	3	0.61	0.61647
GO:0008219	cell death	116	3	0.61	0.61647
GO:0072595	maintenance of protein localization in organelle	17	0	0.09	0.61699
GO:0072506	trivalent inorganic anion homeostasis	12	0	0.06	0.61787
GO:0055062	phosphate ion homeostasis	12	0	0.06	0.61787
GO:0044550	secondary metabolite biosynthetic process	309	0	1.61	0.61828
GO:0043687	post-translational protein modification	8	0	0.04	0.61864
GO:0006207	'de novo' pyrimidine nucleobase biosynthetic process	19	0	0.1	0.61873
GO:1902680	positive regulation of RNA biosynthetic process	177	1	0.92	0.61963
GO:0046349	amino sugar biosynthetic process	10	0	0.05	0.61974
GO:0052325	cell wall pectin biosynthetic process	8	0	0.04	0.61979
GO:0006282	regulation of DNA repair	11	0	0.06	0.62009
GO:0048645	organ formation	59	0	0.31	0.62022
GO:0010197	polar nucleus fusion	25	1	0.13	0.62061
GO:0009559	embryo sac central cell differentiation	25	1	0.13	0.62061
GO:0009966	regulation of signal transduction	253	0	1.32	0.6216
GO:0035556	intracellular signal transduction	799	2	4.17	0.62189
GO:0032501	multicellular organismal process	1475	9	7.7	0.62196
GO:0009408	response to heat	88	0	0.46	0.62233
GO:0022402	cell cycle process	430	1	2.24	0.62338
GO:0097306	cellular response to alcohol	250	1	1.3	0.62345
GO:1900673	olefin metabolic process	40	0	0.21	0.62454
GO:1900674	olefin biosynthetic process	40	0	0.21	0.62454
GO:0043450	alkene biosynthetic process	40	0	0.21	0.62454
GO:0009692	ethylene metabolic process	40	0	0.21	0.62454
GO:0009693	ethylene biosynthetic process	40	0	0.21	0.62454
GO:0043449	cellular alkene metabolic process	40	0	0.21	0.62454
GO:0043408	regulation of MAPK cascade	31	0	0.16	0.62469
GO:0071824	protein-DNA complex subunit organization	172	2	0.9	0.6247
GO:0008156	negative regulation of DNA replication	12	0	0.06	0.62536
GO:0033353	S-adenosylmethionine cycle	10	0	0.05	0.62557
GO:0032957	inositol trisphosphate metabolic process	18	0	0.09	0.62567
GO:0006664	glycolipid metabolic process	79	0	0.41	0.62733
GO:0032269	negative regulation of cellular protein metabolic process	47	0	0.25	0.62777
GO:0051248	negative regulation of protein metabolic process	47	0	0.25	0.62777
GO:0048588	developmental cell growth	43	0	0.22	0.62799
GO:0009735	response to cytokinin	113	2	0.59	0.62853
GO:0071826	ribonucleoprotein complex subunit organization	328	0	1.71	0.62924
GO:0010150	leaf senescence	28	0	0.15	0.62928
GO:0006334	nucleosome assembly	95	2	0.5	0.62928
GO:0016102	diterpenoid biosynthetic process	33	0	0.17	0.62938
GO:0006323	DNA packaging	119	2	0.62	0.62948
GO:0022618	ribonucleoprotein complex assembly	324	0	1.69	0.62993
GO:0002097	tRNA wobble base modification	21	0	0.11	0.63036
GO:0002098	tRNA wobble uridine modification	21	0	0.11	0.63036
GO:0019220	regulation of phosphate metabolic process	338	1	1.76	0.63084
GO:0051174	regulation of phosphorus metabolic process	338	1	1.76	0.63084
GO:0042159	lipoprotein catabolic process	14	0	0.07	0.63092
GO:0002084	protein depalmitoylation	14	0	0.07	0.63092
GO:0006342	chromatin silencing	69	1	0.36	0.63093
GO:0045814	negative regulation of gene expression, epigenetic	69	1	0.36	0.63093
GO:0061088	regulation of sequestering of zinc ion	16	0	0.08	0.63171
GO:0032119	sequestering of zinc ion	16	0	0.08	0.63171
GO:0006882	cellular zinc ion homeostasis	16	0	0.08	0.63171
GO:2000280	regulation of root development	20	0	0.1	0.63231
GO:0045893	positive regulation of transcription, DNA-templated	174	1	0.91	0.63252
GO:0006561	proline biosynthetic process	17	0	0.09	0.6333
GO:0006338	chromatin remodeling	56	0	0.29	0.63331
GO:0044707	single-multicellular organism process	1439	9	7.51	0.63397
GO:0033692	cellular polysaccharide biosynthetic process	191	1	1	0.634
GO:0017182	peptidyl-diphthamide metabolic process	7	0	0.04	0.63421
GO:0017183	peptidyl-diphthamide biosynthetic process from peptidyl-histidine	7	0	0.04	0.63421
GO:0000301	retrograde transport, vesicle recycling within Golgi	16	0	0.08	0.63492
GO:0080147	root hair cell development	18	0	0.09	0.63514
GO:0006476	protein deacetylation	25	0	0.13	0.63518
GO:0034470	ncRNA processing	540	5	2.82	0.63585
GO:0009753	response to jasmonic acid	53	0	0.28	0.63588
GO:0042256	mature ribosome assembly	11	0	0.06	0.63624
GO:2000028	regulation of photoperiodism, flowering	16	0	0.08	0.63647
GO:0009311	oligosaccharide metabolic process	105	0	0.55	0.63667
GO:0023051	regulation of signaling	255	0	1.33	0.63672
GO:0010646	regulation of cell communication	255	0	1.33	0.63672
GO:0032844	regulation of homeostatic process	26	0	0.14	0.63676
GO:0009846	pollen germination	23	0	0.12	0.63767
GO:0031348	negative regulation of defense response	20	0	0.1	0.63811
GO:0045039	protein import into mitochondrial inner membrane	6	0	0.03	0.63826
GO:0009635	response to herbicide	14	0	0.07	0.63827
GO:0009687	abscisic acid metabolic process	12	0	0.06	0.6384
GO:0009057	macromolecule catabolic process	1408	6	7.35	0.63854
GO:0035404	histone-serine phosphorylation	7	0	0.04	0.63888
GO:0006528	asparagine metabolic process	27	1	0.14	0.63888
GO:0006529	asparagine biosynthetic process	27	1	0.14	0.63888
GO:0071702	organic substance transport	1599	9	8.35	0.63925
GO:0045892	negative regulation of transcription, DNA-templated	126	1	0.66	0.6394
GO:1902679	negative regulation of RNA biosynthetic process	126	1	0.66	0.6394
GO:0051253	negative regulation of RNA metabolic process	126	1	0.66	0.6394
GO:0006144	purine nucleobase metabolic process	42	0	0.22	0.64137
GO:0006265	DNA topological change	31	0	0.16	0.64149
GO:0000373	Group II intron splicing	21	0	0.11	0.64153
GO:0016024	CDP-diacylglycerol biosynthetic process	8	0	0.04	0.64181
GO:0046341	CDP-diacylglycerol metabolic process	8	0	0.04	0.64181
GO:0048564	photosystem I assembly	14	0	0.07	0.6419
GO:0005984	disaccharide metabolic process	71	0	0.37	0.6419
GO:0080163	regulation of protein serine/threonine phosphatase activity	44	1	0.23	0.64326
GO:0009793	embryo development ending in seed dormancy	177	1	0.92	0.64394
GO:0031324	negative regulation of cellular metabolic process	212	1	1.11	0.64441
GO:0000724	double-strand break repair via homologous recombination	70	0	0.37	0.64483
GO:0000725	recombinational repair	70	0	0.37	0.64483
GO:0043647	inositol phosphate metabolic process	29	0	0.15	0.64569
GO:0032446	protein modification by small protein conjugation	653	1	3.41	0.64658
GO:0045005	DNA-dependent DNA replication maintenance of fidelity	8	0	0.04	0.64706
GO:0006401	RNA catabolic process	133	1	0.69	0.6479
GO:0007602	phototransduction	18	0	0.09	0.64794
GO:0009585	red, far-red light phototransduction	18	0	0.09	0.64794
GO:0009404	toxin metabolic process	48	0	0.25	0.64798
GO:0010038	response to metal ion	73	0	0.38	0.64857
GO:0009653	anatomical structure morphogenesis	472	4	2.46	0.6493
GO:0043254	regulation of protein complex assembly	84	0	0.44	0.64971
GO:0065004	protein-DNA complex assembly	169	2	0.88	0.65104
GO:0010647	positive regulation of cell communication	34	0	0.18	0.65125
GO:0000972	transcription-dependent tethering of RNA polymerase II gene DNA at nuclear periphery	8	0	0.04	0.65175
GO:0006273	lagging strand elongation	22	0	0.11	0.65237
GO:0034660	ncRNA metabolic process	668	5	3.49	0.65249
GO:0009642	response to light intensity	48	3	0.25	0.65251
GO:0006270	DNA replication initiation	34	0	0.18	0.65255
GO:0006096	glycolytic process	123	0	0.64	0.65274
GO:0045859	regulation of protein kinase activity	100	0	0.52	0.65278
GO:0030243	cellulose metabolic process	110	1	0.57	0.65282
GO:0030244	cellulose biosynthetic process	73	0	0.38	0.65292
GO:0048438	floral whorl development	73	0	0.38	0.65347
GO:0051275	beta-glucan catabolic process	44	1	0.23	0.65365
GO:0042304	regulation of fatty acid biosynthetic process	13	0	0.07	0.65427
GO:0045926	negative regulation of growth	14	0	0.07	0.6548
GO:0007017	microtubule-based process	302	0	1.58	0.65563
GO:0030001	metal ion transport	472	5	2.46	0.65564
GO:0035246	peptidyl-arginine N-methylation	12	0	0.06	0.6559
GO:0035247	peptidyl-arginine omega-N-methylation	12	0	0.06	0.6559
GO:0034969	histone arginine methylation	12	0	0.06	0.6559
GO:0048653	anther development	28	0	0.15	0.65741
GO:0006075	(1->3)-beta-D-glucan biosynthetic process	27	0	0.14	0.65777
GO:0016050	vesicle organization	197	0	1.03	0.65779
GO:0016119	carotene metabolic process	12	0	0.06	0.65838
GO:0009411	response to UV	36	0	0.19	0.65894
GO:0006518	peptide metabolic process	151	0	0.79	0.65912
GO:0016098	monoterpenoid metabolic process	7	0	0.04	0.66008
GO:0016099	monoterpenoid biosynthetic process	7	0	0.04	0.66008
GO:0006084	acetyl-CoA metabolic process	19	0	0.1	0.66029
GO:0070681	glutaminyl-tRNAGln biosynthesis via transamidation	6	0	0.03	0.66083
GO:0002682	regulation of immune system process	51	0	0.27	0.66217
GO:0010604	positive regulation of macromolecule metabolic process	352	1	1.84	0.66228
GO:0044087	regulation of cellular component biogenesis	112	0	0.58	0.66298
GO:0007010	cytoskeleton organization	216	0	1.13	0.66401
GO:0030042	actin filament depolymerization	23	0	0.12	0.66474
GO:0051261	protein depolymerization	23	0	0.12	0.66474
GO:0006417	regulation of translation	151	0	0.79	0.66494
GO:0071395	cellular response to jasmonic acid stimulus	46	0	0.24	0.66511
GO:0009867	jasmonic acid mediated signaling pathway	46	0	0.24	0.66511
GO:0016093	polyprenol metabolic process	12	0	0.06	0.66542
GO:0019348	dolichol metabolic process	12	0	0.06	0.66542
GO:0016115	terpenoid catabolic process	24	0	0.13	0.6668
GO:0008300	isoprenoid catabolic process	24	0	0.13	0.6668
GO:0009066	aspartate family amino acid metabolic process	122	1	0.64	0.66692
GO:0006783	heme biosynthetic process	36	1	0.19	0.66905
GO:0008154	actin polymerization or depolymerization	51	0	0.27	0.66931
GO:0006915	apoptotic process	27	0	0.14	0.66934
GO:0051604	protein maturation	218	0	1.14	0.66955
GO:0000245	spliceosomal complex assembly	34	0	0.18	0.66988
GO:0048856	anatomical structure development	1266	10	6.61	0.67038
GO:0034047	regulation of protein phosphatase type 2A activity	37	0	0.19	0.67176
GO:0090305	nucleic acid phosphodiester bond hydrolysis	309	5	1.61	0.672
GO:0009095	aromatic amino acid family biosynthetic process, prephenate pathway	14	1	0.07	0.67241
GO:0044255	cellular lipid metabolic process	919	5	4.8	0.67241
GO:0048573	photoperiodism, flowering	37	0	0.19	0.67243
GO:0030259	lipid glycosylation	11	0	0.06	0.67346
GO:0031349	positive regulation of defense response	30	0	0.16	0.67474
GO:0009860	pollen tube growth	28	0	0.15	0.67478
GO:0010449	root meristem growth	13	0	0.07	0.67485
GO:0055074	calcium ion homeostasis	18	0	0.09	0.67523
GO:0044774	mitotic DNA integrity checkpoint	8	0	0.04	0.67594
GO:0006081	cellular aldehyde metabolic process	62	0	0.32	0.676
GO:0009147	pyrimidine nucleoside triphosphate metabolic process	36	0	0.19	0.67621
GO:0048437	floral organ development	99	0	0.52	0.67632
GO:2001020	regulation of response to DNA damage stimulus	13	0	0.07	0.67699
GO:0018205	peptidyl-lysine modification	94	1	0.49	0.67715
GO:0006508	proteolysis	1435	2	7.49	0.67742
GO:0071365	cellular response to auxin stimulus	142	0	0.74	0.67765
GO:0009734	auxin-activated signaling pathway	142	0	0.74	0.67765
GO:0050832	defense response to fungus	114	1	0.59	0.67801
GO:0035670	plant-type ovary development	24	0	0.13	0.6788
GO:0048481	ovule development	24	0	0.13	0.6788
GO:0019856	pyrimidine nucleobase biosynthetic process	23	0	0.12	0.67884
GO:0031050	dsRNA fragmentation	42	0	0.22	0.68024
GO:0071359	cellular response to dsRNA	42	0	0.22	0.68024
GO:0043331	response to dsRNA	42	0	0.22	0.68024
GO:0070918	production of small RNA involved in gene silencing by RNA	42	0	0.22	0.68024
GO:0051173	positive regulation of nitrogen compound metabolic process	197	1	1.03	0.68194
GO:0015994	chlorophyll metabolic process	73	0	0.38	0.68233
GO:0006383	transcription from RNA polymerase III promoter	48	0	0.25	0.68285
GO:0031425	chloroplast RNA processing	16	0	0.08	0.68285
GO:0051568	histone H3-K4 methylation	18	0	0.09	0.68288
GO:0042542	response to hydrogen peroxide	176	0	0.92	0.68342
GO:0009723	response to ethylene	125	0	0.65	0.68426
GO:0010927	cellular component assembly involved in morphogenesis	38	0	0.2	0.68442
GO:0010208	pollen wall assembly	38	0	0.2	0.68442
GO:0032989	cellular component morphogenesis	244	0	1.27	0.68481
GO:0048767	root hair elongation	15	0	0.08	0.68508
GO:0032544	plastid translation	10	0	0.05	0.68591
GO:0009737	response to abscisic acid	339	1	1.77	0.68623
GO:0006566	threonine metabolic process	19	0	0.1	0.68669
GO:0071446	cellular response to salicylic acid stimulus	32	0	0.17	0.68743
GO:0009863	salicylic acid mediated signaling pathway	32	0	0.17	0.68743
GO:0006145	purine nucleobase catabolic process	15	0	0.08	0.68766
GO:0007219	Notch signaling pathway	6	0	0.03	0.68784
GO:0010135	ureide metabolic process	6	0	0.03	0.68784
GO:0010136	ureide catabolic process	6	0	0.03	0.68784
GO:0000226	microtubule cytoskeleton organization	119	0	0.62	0.68814
GO:0007008	outer mitochondrial membrane organization	12	1	0.06	0.68816
GO:0045040	protein import into mitochondrial outer membrane	12	1	0.06	0.68816
GO:0046168	glycerol-3-phosphate catabolic process	7	0	0.04	0.68976
GO:0046854	phosphatidylinositol phosphorylation	46	0	0.24	0.6898
GO:0046834	lipid phosphorylation	46	0	0.24	0.6898
GO:0051084	'de novo' posttranslational protein folding	11	0	0.06	0.68992
GO:0051085	chaperone mediated protein folding requiring cofactor	11	0	0.06	0.68992
GO:0006458	'de novo' protein folding	11	0	0.06	0.68992
GO:0042157	lipoprotein metabolic process	74	0	0.39	0.69041
GO:0006869	lipid transport	104	0	0.54	0.69071
GO:0034508	centromere complex assembly	6	0	0.03	0.69108
GO:0045787	positive regulation of cell cycle	18	0	0.09	0.69128
GO:0007015	actin filament organization	71	0	0.37	0.69142
GO:0007165	signal transduction	1594	4	8.32	0.6917
GO:0071310	cellular response to organic substance	606	3	3.16	0.69183
GO:0007275	multicellular organismal development	1341	9	7	0.69197
GO:0006903	vesicle targeting	11	0	0.06	0.69246
GO:0048199	vesicle targeting, to, from or within Golgi	11	0	0.06	0.69246
GO:0046900	tetrahydrofolylpolyglutamate metabolic process	12	0	0.06	0.69251
GO:0009887	organ morphogenesis	101	0	0.53	0.6926
GO:0033015	tetrapyrrole catabolic process	26	0	0.14	0.69298
GO:0006787	porphyrin-containing compound catabolic process	26	0	0.14	0.69298
GO:0046037	GMP metabolic process	12	0	0.06	0.69306
GO:0051273	beta-glucan metabolic process	144	1	0.75	0.69306
GO:0048572	short-day photoperiodism	8	0	0.04	0.69376
GO:0048575	short-day photoperiodism, flowering	8	0	0.04	0.69376
GO:0043632	modification-dependent macromolecule catabolic process	625	3	3.26	0.69391
GO:0009266	response to temperature stimulus	160	0	0.84	0.6946
GO:0007006	mitochondrial membrane organization	25	1	0.13	0.69473
GO:0006432	phenylalanyl-tRNA aminoacylation	8	0	0.04	0.69502
GO:0009620	response to fungus	130	1	0.68	0.6973
GO:0010104	regulation of ethylene-activated signaling pathway	50	0	0.26	0.69735
GO:0070297	regulation of phosphorelay signal transduction system	50	0	0.26	0.69735
GO:0009751	response to salicylic acid	42	0	0.22	0.6985
GO:1901575	organic substance catabolic process	2154	6	11.24	0.69898
GO:0072350	tricarboxylic acid metabolic process	10	0	0.05	0.69911
GO:0023014	signal transduction by phosphorylation	169	2	0.88	0.7003
GO:1900865	chloroplast RNA modification	7	0	0.04	0.70094
GO:0009407	toxin catabolic process	44	0	0.23	0.70181
GO:0090487	secondary metabolite catabolic process	44	0	0.23	0.70181
GO:0018342	protein prenylation	14	0	0.07	0.70205
GO:0097354	prenylation	14	0	0.07	0.70205
GO:0048878	chemical homeostasis	468	5	2.44	0.7021
GO:0016103	diterpenoid catabolic process	15	0	0.08	0.70349
GO:0006271	DNA strand elongation involved in DNA replication	26	0	0.14	0.70359
GO:0022616	DNA strand elongation	26	0	0.14	0.70359
GO:0044843	cell cycle G1/S phase transition	15	0	0.08	0.70363
GO:0042439	ethanolamine-containing compound metabolic process	31	0	0.16	0.70436
GO:0006266	DNA ligation	13	0	0.07	0.7048
GO:0035383	thioester metabolic process	73	0	0.38	0.70525
GO:0006637	acyl-CoA metabolic process	73	0	0.38	0.70525
GO:0000451	rRNA 2'-O-methylation	7	0	0.04	0.70549
GO:0000453	enzyme-directed rRNA 2'-O-methylation	7	0	0.04	0.70549
GO:0006405	RNA export from nucleus	64	1	0.33	0.70616
GO:0021700	developmental maturation	68	1	0.35	0.70649
GO:1902532	negative regulation of intracellular signal transduction	8	0	0.04	0.70807
GO:0043407	negative regulation of MAP kinase activity	8	0	0.04	0.70807
GO:0043409	negative regulation of MAPK cascade	8	0	0.04	0.70807
GO:0008610	lipid biosynthetic process	707	4	3.69	0.70827
GO:0010092	specification of organ identity	10	0	0.05	0.70942
GO:0010093	specification of floral organ identity	10	0	0.05	0.70942
GO:0009682	induced systemic resistance	6	0	0.03	0.70964
GO:0035493	SNARE complex assembly	18	0	0.09	0.70983
GO:0010628	positive regulation of gene expression	177	1	0.92	0.71005
GO:0043650	dicarboxylic acid biosynthetic process	38	0	0.2	0.71086
GO:0009605	response to external stimulus	453	3	2.36	0.7111
GO:2000241	regulation of reproductive process	120	0	0.63	0.71136
GO:0009113	purine nucleobase biosynthetic process	24	0	0.13	0.71157
GO:0006090	pyruvate metabolic process	150	0	0.78	0.71166
GO:0006984	ER-nucleus signaling pathway	10	0	0.05	0.71195
GO:0023052	signaling	1603	4	8.37	0.71313
GO:0044700	single organism signaling	1603	4	8.37	0.71313
GO:0009909	regulation of flower development	76	0	0.4	0.71383
[truncated: 2,565 more rows]

## Sheet: blue
Supplementary Table 8. GO analysis of DEGs of modules.
BP
GO.ID	Term	Annotated	Significant	Expected	KS
GO:0009765	photosynthesis, light harvesting	112	0	0.83	0.00013
GO:0006457	protein folding	404	3	3.01	0.00106
GO:1902600	hydrogen ion transmembrane transport	442	0	3.29	0.00113
GO:0017157	regulation of exocytosis	10	0	0.07	0.00125
GO:0055085	transmembrane transport	2027	12	15.09	0.00356
GO:0051307	meiotic chromosome separation	16	0	0.12	0.00518
GO:0046274	lignin catabolic process	49	0	0.36	0.00546
GO:0044267	cellular protein metabolic process	6165	37	45.9	0.00672
GO:0043622	cortical microtubule organization	6	0	0.04	0.00675
GO:0000911	cytokinesis by cell plate formation	44	0	0.33	0.00713
GO:0009115	xanthine catabolic process	9	0	0.07	0.00795
GO:0006165	nucleoside diphosphate phosphorylation	13	0	0.1	0.00819
GO:0006183	GTP biosynthetic process	13	0	0.1	0.00819
GO:0006228	UTP biosynthetic process	13	0	0.1	0.00819
GO:0030433	ER-associated ubiquitin-dependent protein catabolic process	55	0	0.41	0.00825
GO:0010603	regulation of cytoplasmic mRNA processing body assembly	10	0	0.07	0.00927
GO:0009308	amine metabolic process	195	4	1.45	0.00929
GO:0010051	xylem and phloem pattern formation	35	0	0.26	0.00951
GO:0009870	defense response signaling pathway, resistance gene-dependent	13	0	0.1	0.00999
GO:0008356	asymmetric cell division	11	0	0.08	0.012
GO:0006887	exocytosis	173	4	1.29	0.01245
GO:0046942	carboxylic acid transport	208	0	1.55	0.01435
GO:0015849	organic acid transport	208	0	1.55	0.01435
GO:0006740	NADPH regeneration	49	0	0.36	0.01468
GO:0006098	pentose-phosphate shunt	49	0	0.36	0.01468
GO:0009100	glycoprotein metabolic process	155	1	1.15	0.01508
GO:0009101	glycoprotein biosynthetic process	155	1	1.15	0.01508
GO:0006732	coenzyme metabolic process	332	0	2.47	0.01539
GO:0009052	pentose-phosphate shunt, non-oxidative branch	16	0	0.12	0.01663
GO:0006835	dicarboxylic acid transport	47	0	0.35	0.01735
GO:0098656	anion transmembrane transport	269	0	2	0.01737
GO:0010305	leaf vascular tissue pattern formation	18	0	0.13	0.01768
GO:0030150	protein import into mitochondrial matrix	40	0	0.3	0.01772
GO:0070085	glycosylation	170	1	1.27	0.01805
GO:0046034	ATP metabolic process	455	0	3.39	0.01842
GO:0032958	inositol phosphate biosynthetic process	6	0	0.04	0.01875
GO:0042775	mitochondrial ATP synthesis coupled electron transport	53	0	0.39	0.01941
GO:0006730	one-carbon metabolic process	72	0	0.54	0.01996
GO:0006556	S-adenosylmethionine biosynthetic process	18	0	0.13	0.02034
GO:0034220	ion transmembrane transport	1090	2	8.11	0.02037
GO:0015740	C4-dicarboxylate transport	29	0	0.22	0.02107
GO:0042451	purine nucleoside biosynthetic process	325	0	2.42	0.02247
GO:0046129	purine ribonucleoside biosynthetic process	325	0	2.42	0.02247
GO:0006486	protein glycosylation	147	1	1.09	0.02282
GO:0043413	macromolecule glycosylation	147	1	1.09	0.02282
GO:0010496	intercellular transport	21	0	0.16	0.02288
GO:0015743	malate transport	27	0	0.2	0.02297
GO:0009902	chloroplast relocation	30	0	0.22	0.02306
GO:0051667	establishment of plastid localization	30	0	0.22	0.02306
GO:0051644	plastid localization	30	0	0.22	0.02306
GO:0032940	secretion by cell	187	4	1.39	0.02553
GO:0051640	organelle localization	61	0	0.45	0.02566
GO:0009059	macromolecule biosynthetic process	4948	64	36.84	0.02618
GO:0046836	glycolipid transport	9	0	0.07	0.0266
GO:0006163	purine nucleotide metabolic process	705	0	5.25	0.02682
GO:0006865	amino acid transport	145	0	1.08	0.02689
GO:0006591	ornithine metabolic process	18	1	0.13	0.02751
GO:0009631	cold acclimation	15	0	0.11	0.02776
GO:0000712	resolution of meiotic recombination intermediates	12	0	0.09	0.02867
GO:0046128	purine ribonucleoside metabolic process	718	0	5.35	0.02872
GO:0030010	establishment of cell polarity	7	0	0.05	0.02942
GO:0007163	establishment or maintenance of cell polarity	7	0	0.05	0.02942
GO:0030091	protein repair	36	0	0.27	0.03063
GO:0044106	cellular amine metabolic process	138	3	1.03	0.03119
GO:0034645	cellular macromolecule biosynthetic process	4856	63	36.15	0.03155
GO:0009141	nucleoside triphosphate metabolic process	622	0	4.63	0.03174
GO:0006739	NADP metabolic process	53	0	0.39	0.03202
GO:0009082	branched-chain amino acid biosynthetic process	36	0	0.27	0.0323
GO:0009637	response to blue light	17	0	0.13	0.03231
GO:0009725	response to hormone	977	20	7.27	0.03315
GO:0015706	nitrate transport	15	2	0.11	0.03361
GO:0010951	negative regulation of endopeptidase activity	53	3	0.39	0.03394
GO:0052548	regulation of endopeptidase activity	53	3	0.39	0.03394
GO:0009719	response to endogenous stimulus	980	20	7.3	0.03437
GO:0006972	hyperosmotic response	24	0	0.18	0.03491
GO:0009150	purine ribonucleotide metabolic process	698	0	5.2	0.03537
GO:0008616	queuosine biosynthetic process	15	0	0.11	0.03684
GO:0046116	queuosine metabolic process	15	0	0.11	0.03684
GO:0000710	meiotic mismatch repair	11	0	0.08	0.03722
GO:0017004	cytochrome complex assembly	124	0	0.92	0.03722
GO:0010204	defense response signaling pathway, resistance gene-independent	10	0	0.07	0.03732
GO:0006544	glycine metabolic process	37	0	0.28	0.03741
GO:0034050	host programmed cell death induced by symbiont	37	0	0.28	0.03769
GO:0009626	plant-type hypersensitive response	37	0	0.28	0.03769
GO:1901137	carbohydrate derivative biosynthetic process	687	1	5.11	0.03771
GO:0009144	purine nucleoside triphosphate metabolic process	592	0	4.41	0.03861
GO:0010087	phloem or xylem histogenesis	44	0	0.33	0.0387
GO:0072522	purine-containing compound biosynthetic process	372	0	2.77	0.0388
GO:0006164	purine nucleotide biosynthetic process	327	0	2.43	0.03896
GO:0006595	polyamine metabolic process	49	1	0.36	0.0394
GO:0009119	ribonucleoside metabolic process	770	0	5.73	0.03968
GO:0015698	inorganic anion transport	147	3	1.09	0.03981
GO:0000027	ribosomal large subunit assembly	87	0	0.65	0.04016
GO:0009205	purine ribonucleoside triphosphate metabolic process	589	0	4.39	0.04035
GO:0046903	secretion	191	4	1.42	0.04247
GO:0051656	establishment of organelle localization	57	0	0.42	0.0426
GO:0046451	diaminopimelate metabolic process	21	0	0.16	0.04281
GO:0009085	lysine biosynthetic process	21	0	0.16	0.04281
GO:0009089	lysine biosynthetic process via diaminopimelate	21	0	0.16	0.04281
GO:0010033	response to organic substance	1086	22	8.09	0.04313
GO:0000060	protein import into nucleus, translocation	14	0	0.1	0.04374
GO:0006610	ribosomal protein import into nucleus	14	0	0.1	0.04374
GO:0042989	sequestering of actin monomers	9	0	0.07	0.04412
GO:1901657	glycosyl compound metabolic process	853	0	6.35	0.04598
GO:0009152	purine ribonucleotide biosynthetic process	325	0	2.42	0.04695
GO:0098661	inorganic anion transmembrane transport	58	0	0.43	0.04749
GO:0042278	purine nucleoside metabolic process	726	0	5.41	0.04755
GO:0046500	S-adenosylmethionine metabolic process	31	0	0.23	0.04779
GO:1901135	carbohydrate derivative metabolic process	1298	1	9.66	0.04797
GO:0009199	ribonucleoside triphosphate metabolic process	605	0	4.5	0.04812
GO:0010540	basipetal auxin transport	7	0	0.05	0.04813
GO:0007005	mitochondrion organization	201	0	1.5	0.05002
GO:0006542	glutamine biosynthetic process	9	0	0.07	0.05195
GO:0042147	retrograde transport, endosome to Golgi	31	0	0.23	0.05201
GO:0009309	amine biosynthetic process	77	1	0.57	0.0527
GO:0042401	cellular biogenic amine biosynthetic process	77	1	0.57	0.0527
GO:0000304	response to singlet oxygen	10	0	0.07	0.0527
GO:0009116	nucleoside metabolic process	808	0	6.02	0.05308
GO:0010311	lateral root formation	24	0	0.18	0.05313
GO:0015807	L-amino acid transport	31	0	0.23	0.05355
GO:0016197	endosomal transport	65	0	0.48	0.0538
GO:0015672	monovalent inorganic cation transport	718	2	5.35	0.05483
GO:0010506	regulation of autophagy	12	0	0.09	0.05543
GO:0006893	Golgi to plasma membrane transport	13	0	0.1	0.05557
GO:0006842	tricarboxylic acid transport	11	0	0.08	0.05572
GO:0071423	malate transmembrane transport	18	0	0.13	0.05615
GO:0018201	peptidyl-glycine modification	9	0	0.07	0.05616
GO:0018008	N-terminal peptidyl-glycine N-myristoylation	9	0	0.07	0.05616
GO:0009768	photosynthesis, light harvesting in photosystem I	42	0	0.31	0.05642
GO:0000469	cleavage involved in rRNA processing	34	0	0.25	0.0571
GO:0009097	isoleucine biosynthetic process	22	0	0.16	0.05737
GO:0006549	isoleucine metabolic process	22	0	0.16	0.05737
GO:0010467	gene expression	5459	62	40.64	0.05786
GO:0019637	organophosphate metabolic process	1317	0	9.8	0.05849
GO:0006607	NLS-bearing protein import into nucleus	30	0	0.22	0.05934
GO:0071051	polyadenylation-dependent snoRNA 3'-end processing	9	0	0.07	0.06059
GO:0016074	snoRNA metabolic process	9	0	0.07	0.06059
GO:0031126	snoRNA 3'-end processing	9	0	0.07	0.06059
GO:0043144	snoRNA processing	9	0	0.07	0.06059
GO:0010466	negative regulation of peptidase activity	55	3	0.41	0.06107
GO:0052547	regulation of peptidase activity	55	3	0.41	0.06107
GO:0033238	regulation of cellular amine metabolic process	18	2	0.13	0.06139
GO:0006521	regulation of cellular amino acid metabolic process	18	2	0.13	0.06139
GO:0010497	plasmodesmata-mediated intercellular transport	11	0	0.08	0.0614
GO:0051181	cofactor transport	79	0	0.59	0.06168
GO:0009168	purine ribonucleoside monophosphate biosynthetic process	278	0	2.07	0.06212
GO:0009127	purine nucleoside monophosphate biosynthetic process	278	0	2.07	0.06212
GO:0072521	purine-containing compound metabolic process	797	0	5.93	0.06243
GO:0018130	heterocycle biosynthetic process	3421	57	25.47	0.06317
GO:0006007	glucose catabolic process	53	0	0.39	0.06343
GO:0006553	lysine metabolic process	22	0	0.16	0.06381
GO:0009611	response to wounding	58	2	0.43	0.06409
GO:0098660	inorganic ion transmembrane transport	747	2	5.56	0.06417
GO:0009903	chloroplast avoidance movement	19	0	0.14	0.06422
GO:0006303	double-strand break repair via nonhomologous end joining	14	0	0.1	0.06496
GO:0000726	non-recombinational repair	14	0	0.1	0.06496
GO:0051346	negative regulation of hydrolase activity	64	3	0.48	0.06531
GO:0010039	response to iron ion	20	0	0.15	0.06637
GO:0005978	glycogen biosynthetic process	19	0	0.14	0.06693
GO:0044699	single-organism process	13784	82	102.62	0.06703
GO:0006289	nucleotide-excision repair	45	0	0.34	0.06829
GO:0007059	chromosome segregation	87	0	0.65	0.06888
GO:0036297	interstrand cross-link repair	7	0	0.05	0.069
GO:0010030	positive regulation of seed germination	6	0	0.04	0.06911
GO:0006820	anion transport	473	5	3.52	0.06913
GO:0006108	malate metabolic process	47	0	0.35	0.0696
GO:0042546	cell wall biogenesis	185	7	1.38	0.06971
GO:0009167	purine ribonucleoside monophosphate metabolic process	509	0	3.79	0.07042
GO:0009126	purine nucleoside monophosphate metabolic process	509	0	3.79	0.07042
GO:1901678	iron coordination entity transport	66	0	0.49	0.07042
GO:0015886	heme transport	66	0	0.49	0.07042
GO:0000919	cell plate assembly	14	0	0.1	0.0706
GO:0042254	ribosome biogenesis	602	1	4.48	0.07349
GO:0006351	transcription, DNA-templated	2543	57	18.93	0.07355
GO:0031935	regulation of chromatin silencing	13	0	0.1	0.07468
GO:0018298	protein-chromophore linkage	150	0	1.12	0.07469
GO:0042274	ribosomal small subunit biogenesis	191	0	1.42	0.07501
GO:0033609	oxalate metabolic process	38	0	0.28	0.07568
GO:0072524	pyridine-containing compound metabolic process	94	0	0.7	0.07678
GO:0034654	nucleobase-containing compound biosynthetic process	3120	57	23.23	0.07711
GO:0009123	nucleoside monophosphate metabolic process	546	0	4.06	0.07839
GO:0009723	response to ethylene	125	8	0.93	0.07854
GO:0016192	vesicle-mediated transport	669	4	4.98	0.07859
GO:0042816	vitamin B6 metabolic process	11	0	0.08	0.07981
GO:0042819	vitamin B6 biosynthetic process	11	0	0.08	0.07981
GO:0071897	DNA biosynthetic process	50	0	0.37	0.08003
GO:0032774	RNA biosynthetic process	2556	57	19.03	0.08038
GO:0016117	carotenoid biosynthetic process	41	0	0.31	0.08094
GO:0016109	tetraterpenoid biosynthetic process	41	0	0.31	0.08094
GO:0006412	translation	1714	4	12.76	0.08141
GO:0070585	protein localization to mitochondrion	82	0	0.61	0.08154
GO:0072655	establishment of protein localization to mitochondrion	82	0	0.61	0.08154
GO:0006626	protein targeting to mitochondrion	82	0	0.61	0.08154
GO:0009124	nucleoside monophosphate biosynthetic process	315	0	2.35	0.08173
GO:0010343	singlet oxygen-mediated programmed cell death	9	0	0.07	0.08229
GO:0071452	cellular response to singlet oxygen	9	0	0.07	0.08229
GO:0036473	cell death in response to oxidative stress	9	0	0.07	0.08229
GO:0097468	programmed cell death in response to reactive oxygen species	9	0	0.07	0.08229
GO:1902593	single-organism nuclear import	90	0	0.67	0.08393
GO:0044744	protein targeting to nucleus	90	0	0.67	0.08393
GO:0051170	nuclear import	90	0	0.67	0.08393
GO:0006606	protein import into nucleus	90	0	0.67	0.08393
GO:0010431	seed maturation	40	0	0.3	0.08466
GO:0009800	cinnamic acid biosynthetic process	18	0	0.13	0.08573
GO:0009803	cinnamic acid metabolic process	18	0	0.13	0.08573
GO:0042273	ribosomal large subunit biogenesis	184	0	1.37	0.08734
GO:0042538	hyperosmotic salinity response	21	0	0.16	0.08802
GO:0019752	carboxylic acid metabolic process	1805	13	13.44	0.08905
GO:0008037	cell recognition	63	2	0.47	0.08952
GO:0048544	recognition of pollen	63	2	0.47	0.08952
GO:0060968	regulation of gene silencing	20	0	0.15	0.08972
GO:0060249	anatomical structure homeostasis	41	0	0.31	0.09069
GO:0006733	oxidoreduction coenzyme metabolic process	95	0	0.71	0.0909
GO:0003333	amino acid transmembrane transport	130	0	0.97	0.09278
GO:0018377	protein myristoylation	10	0	0.07	0.09326
GO:0006498	N-terminal protein lipidation	10	0	0.07	0.09326
GO:0006499	N-terminal protein myristoylation	10	0	0.07	0.09326
GO:0042255	ribosome assembly	169	0	1.26	0.09334
GO:0042455	ribonucleoside biosynthetic process	371	0	2.76	0.09439
GO:0046040	IMP metabolic process	35	0	0.26	0.09447
GO:0090002	establishment of protein localization to plasma membrane	7	0	0.05	0.09473
GO:0043001	Golgi to plasma membrane protein transport	7	0	0.05	0.09473
GO:0007009	plasma membrane organization	7	0	0.05	0.09473
GO:0072659	protein localization to plasma membrane	7	0	0.05	0.09473
GO:0016116	carotenoid metabolic process	47	0	0.35	0.09585
GO:0016108	tetraterpenoid metabolic process	47	0	0.35	0.09585
GO:0042221	response to chemical	1691	26	12.59	0.09586
GO:0009904	chloroplast accumulation movement	22	0	0.16	0.09653
GO:0045903	positive regulation of translational fidelity	25	0	0.19	0.09717
GO:0006753	nucleoside phosphate metabolic process	953	0	7.1	0.09749
GO:0007265	Ras protein signal transduction	26	0	0.19	0.09763
GO:0046578	regulation of Ras protein signal transduction	26	0	0.19	0.09763
GO:0051056	regulation of small GTPase mediated signal transduction	26	0	0.19	0.09763
GO:0032011	ARF protein signal transduction	26	0	0.19	0.09763
GO:0032012	regulation of ARF protein signal transduction	26	0	0.19	0.09763
GO:0009820	alkaloid metabolic process	6	0	0.04	0.09825
GO:0009821	alkaloid biosynthetic process	6	0	0.04	0.09825
GO:0045490	pectin catabolic process	150	0	1.12	0.09863
GO:0018108	peptidyl-tyrosine phosphorylation	48	0	0.36	0.09873
GO:0018212	peptidyl-tyrosine modification	48	0	0.36	0.09873
GO:0080050	regulation of seed development	18	0	0.13	0.09874
GO:0071554	cell wall organization or biogenesis	810	8	6.03	0.09887
GO:0022610	biological adhesion	11	0	0.08	0.09891
GO:0007155	cell adhesion	11	0	0.08	0.09891
GO:0009259	ribonucleotide metabolic process	731	0	5.44	0.09937
GO:0019693	ribose phosphate metabolic process	731	0	5.44	0.09937
GO:0032200	telomere organization	39	0	0.29	0.10028
GO:0000723	telomere maintenance	39	0	0.29	0.10028
GO:0044000	movement in host	15	0	0.11	0.10113
GO:0051814	movement in other organism involved in symbiotic interaction	15	0	0.11	0.10113
GO:0052192	movement in environment of other organism involved in symbiotic interaction	15	0	0.11	0.10113
GO:0052126	movement in host environment	15	0	0.11	0.10113
GO:0044766	multi-organism transport	15	0	0.11	0.10113
GO:0046794	transport of virus	15	0	0.11	0.10113
GO:0046739	transport of virus in multicellular host	15	0	0.11	0.10113
GO:0044271	cellular nitrogen compound biosynthetic process	3420	59	25.46	0.10155
GO:0015936	coenzyme A metabolic process	42	0	0.31	0.10176
GO:0010231	maintenance of seed dormancy	8	0	0.06	0.10177
GO:0097437	maintenance of dormancy	8	0	0.06	0.10177
GO:0051649	establishment of localization in cell	1057	6	7.87	0.10188
GO:0051171	regulation of nitrogen compound metabolic process	2251	52	16.76	0.102
GO:0017038	protein import	193	0	1.44	0.10249
GO:0000272	polysaccharide catabolic process	309	2	2.3	0.10304
GO:0098662	inorganic cation transmembrane transport	712	2	5.3	0.10311
GO:0009889	regulation of biosynthetic process	2234	52	16.63	0.10322
GO:0015985	energy coupled proton transport, down electrochemical gradient	187	0	1.39	0.10348
GO:0015986	ATP synthesis coupled proton transport	187	0	1.39	0.10348
GO:0033387	putrescine biosynthetic process from ornithine	7	1	0.05	0.1036
GO:2000896	amylopectin metabolic process	7	0	0.05	0.10373
GO:0010021	amylopectin biosynthetic process	7	0	0.05	0.10373
GO:0000187	activation of MAPK activity	7	0	0.05	0.10412
GO:1902533	positive regulation of intracellular signal transduction	7	0	0.05	0.10412
GO:0043410	positive regulation of MAPK cascade	7	0	0.05	0.10412
GO:0043406	positive regulation of MAP kinase activity	7	0	0.05	0.10412
GO:0032509	endosome transport via multivesicular body sorting pathway	15	0	0.11	0.10429
GO:0018196	peptidyl-asparagine modification	17	1	0.13	0.10441
GO:0018279	protein N-linked glycosylation via asparagine	17	1	0.13	0.10441
GO:0001927	exocyst assembly	11	0	0.08	0.10457
GO:0010332	response to gamma radiation	10	0	0.07	0.10491
GO:0009108	coenzyme biosynthetic process	197	0	1.47	0.105
GO:0043648	dicarboxylic acid metabolic process	174	0	1.3	0.10527
GO:0046365	monosaccharide catabolic process	57	0	0.42	0.10538
GO:0019320	hexose catabolic process	57	0	0.42	0.10538
GO:0009875	pollen-pistil interaction	65	2	0.48	0.10591
GO:0080090	regulation of primary metabolic process	2640	55	19.65	0.10829
GO:0009161	ribonucleoside monophosphate metabolic process	535	0	3.98	0.10865
GO:0098586	cellular response to virus	6	0	0.04	0.10881
GO:0031326	regulation of cellular biosynthetic process	2230	52	16.6	0.10909
GO:0051601	exocyst localization	15	0	0.11	0.10939
GO:0000956	nuclear-transcribed mRNA catabolic process	90	3	0.67	0.10943
GO:0050789	regulation of biological process	5123	72	38.14	0.11064
GO:0006189	'de novo' IMP biosynthetic process	28	0	0.21	0.11165
[truncated: 4,270 more rows]
