# Supplementary material for: Reactive oxygen species-related genes participate in resistance to cucumber green mottle mosaic virus infection regulated by boron in Nicotiana benthamiana and watermelon
Source: Front Plant Sci. 2022 Nov 11;13:1027404. doi: 10.3389/fpls.2022.1027404 (PMC9691971; doi:10.3389/fpls.2022.1027404)
Supplement: Supplementary file 10 [file Table_9.xlsx]

## Sheet: blue
Supplementary Table 9. KEGG pathway analysis of DEGs of modules.
KEGG pathway	KEGG pathway ID	DEG number in specified annotation KEGG pathways	All gene number in specified annotation KEGG pathways.	DEG number in all annotation KEGG pathways.	All gene number in all annotation KEGG pathways.	DEG IDs in specified annotation KEGG pathways
Plant-pathogen interaction	ko04626	17	403	60	12184	Niben101Scf00069g15020;Niben101Scf00109g07005;Niben101Scf00747g12035;Niben101Scf01297g04003;Niben101Scf01297g04006;Niben101Scf02195g01001;Niben101Scf02362g02014;Niben101Scf02430g03006;Niben101Scf04133g02009;Niben101Scf05029g02016;Niben101Scf05060g07008;Niben101Scf06684g01005;Niben101Scf07451g00013;Niben101Scf08035g00009;Niben101Scf11105g01005;Niben101Scf13289g00008;Niben101Scf15156g01002
Endocytosis	ko04144	7	423	60	12184	Niben101Scf00449g06008;Niben101Scf02816g01009;Niben101Scf03238g00012;Niben101Scf04490g00001;Niben101Scf05011g00001;Niben101Scf05506g06005;Niben101Scf07275g02012
Fatty acid biosynthesis	ko00061	2	103	60	12184	Niben101Scf05767g07012;Niben101Scf08030g04001
Fatty acid metabolism	ko01212	2	168	60	12184	Niben101Scf05767g07012;Niben101Scf08030g04001
Ubiquinone and other terpenoid-quinone biosynthesis	ko00130	1	96	60	12184	Niben101Scf05883g00008
Biotin metabolism	ko00780	2	44	60	12184	Niben101Scf05767g07012;Niben101Scf08030g04001
alpha-Linolenic acid metabolism	ko00592	1	88	60	12184	Niben101Scf00779g06009
Arginine and proline metabolism	ko00330	1	131	60	12184	Niben101Scf00887g02006
Plant hormone signal transduction	ko04075	2	646	60	12184	Niben101Scf01524g00006;Niben101Scf04907g01013
Fatty acid elongation	ko00062	1	68	60	12184	Niben101Scf02613g03001
Phosphatidylinositol signaling system	ko04070	2	161	60	12184	Niben101Scf04133g02009;Niben101Scf05060g07008
Spliceosome	ko03040	5	520	60	12184	Niben101Scf00449g06008;Niben101Scf04117g05009;Niben101Scf04490g00001;Niben101Scf05506g06005;Niben101Scf07275g02012
Protein processing in endoplasmic reticulum	ko04141	14	549	60	12184	Niben101Scf00317g09001;Niben101Scf00449g06008;Niben101Scf00970g02006;Niben101Scf01294g05002;Niben101Scf02215g05009;Niben101Scf02513g00006;Niben101Scf03817g16010;Niben101Scf04040g08010;Niben101Scf04091g00013;Niben101Scf04490g00001;Niben101Scf05506g06005;Niben101Scf06684g01005;Niben101Scf07275g02012;Niben101Scf10306g00005
Nitrogen metabolism	ko00910	1	84	60	12184	Niben101Scf07019g02006
Phenylpropanoid biosynthesis	ko00940	1	429	60	12184	Niben101Scf05245g02003
Biosynthesis of unsaturated fatty acids	ko01040	2	61	60	12184	Niben101Scf05767g07012;Niben101Scf08030g04001
Glutathione metabolism	ko00480	6	180	60	12184	Niben101Scf00887g02006;Niben101Scf02325g03024;Niben101Scf03147g09006;Niben101Scf03147g10010;Niben101Scf08130g00014;Niben101Scf08196g01001
SNARE interactions in vesicular transport	ko04130	2	95	60	12184	Niben101Scf02093g00004;Niben101Scf05694g00009
Brassinosteroid biosynthesis	ko00905	2	26	60	12184	Niben101Scf02732g00002;Niben101Scf03693g02001
Zeatin biosynthesis	ko00908	2	85	60	12184	Niben101Scf01612g03002;Niben101Scf04283g02008
RNA degradation	ko03018	3	269	60	12184	Niben101Scf01750g15003;Niben101Scf08034g01002;Niben101Scf10855g08005
Cysteine and methionine metabolism	ko00270	2	260	60	12184	Niben101Scf02918g00003;Niben101Scf08039g01005

## Sheet: brown
Supplementary Table 9. KEGG pathway analysis of DEGs of modules.
KEGG pathway	KEGG pathway ID	DEG number in specified annotation KEGG pathways	All gene number in specified annotation KEGG pathways.	DEG number in all annotation KEGG pathways.	All gene number in all annotation KEGG pathways.	DEG IDs in specified annotation KEGG pathways
Phenylpropanoid biosynthesis	ko00940	2	429	68	12184	Niben101Scf01181g01007;Niben101Scf13289g02018
Cysteine and methionine metabolism	ko00270	4	260	68	12184	Niben101Scf00288g18013;Niben101Scf02719g00006;Niben101Scf03164g07006;Niben101Scf09997g00023
Linoleic acid metabolism	ko00591	1	37	68	12184	Niben101Scf02688g02014
Circadian rhythm - plant	ko04712	1	94	68	12184	Niben101Scf00536g15017
Tropane, piperidine and pyridine alkaloid biosynthesis	ko00960	2	59	68	12184	Niben101Scf03164g07006;Niben101Scf09997g00023
Cyanoamino acid metabolism	ko00460	2	110	68	12184	Niben101Scf01181g01007;Niben101Scf13289g02018
Carbon fixation in photosynthetic organisms	ko00710	8	199	68	12184	Niben101Ctg14777g00001;Niben101Scf00870g03002;Niben101Scf01991g05012;Niben101Scf02381g04022;Niben101Scf03164g07006;Niben101Scf05048g00010;Niben101Scf05226g04004;Niben101Scf09997g00023
Plant hormone signal transduction	ko04075	3	646	68	12184	Niben101Scf01897g07006;Niben101Scf08855g02013;Niben101Scf09260g03002
Ribosome biogenesis in eukaryotes	ko03008	4	214	68	12184	Niben101Scf02348g05008;Niben101Scf05969g01002;Niben101Scf06641g01005;Niben101Scf07590g04001
Photosynthesis - antenna proteins	ko00196	1	80	68	12184	Niben101Scf00264g03023
Protein processing in endoplasmic reticulum	ko04141	8	549	68	12184	Niben101Scf01704g00002;Niben101Scf02771g01007;Niben101Scf02852g00013;Niben101Scf03000g01002;Niben101Scf04364g01003;Niben101Scf04364g01014;Niben101Scf04886g05003;Niben101Scf05528g01009
Glycine, serine and threonine metabolism	ko00260	2	182	68	12184	Niben101Scf00288g18013;Niben101Scf02719g00006
RNA degradation	ko03018	5	269	68	12184	Niben101Scf02699g00016;Niben101Scf03197g06003;Niben101Scf03223g02002;Niben101Scf05467g04002;Niben101Scf07590g04001
Pentose phosphate pathway	ko00030	1	124	68	12184	Niben101Scf05048g00010
RNA transport	ko03013	3	449	68	12184	Niben101Scf03223g02002;Niben101Scf05467g04002;Niben101Scf05676g06014
Carbon metabolism	ko01200	8	652	68	12184	Niben101Ctg14777g00001;Niben101Scf00870g03002;Niben101Scf01991g05012;Niben101Scf02381g04022;Niben101Scf03164g07006;Niben101Scf05048g00010;Niben101Scf05226g04004;Niben101Scf09997g00023
Fructose and mannose metabolism	ko00051	1	154	68	12184	Niben101Scf05048g00010
Arginine biosynthesis	ko00220	3	72	68	12184	Niben101Scf00870g03002;Niben101Scf03164g07006;Niben101Scf09997g00023
Plant-pathogen interaction	ko04626	4	403	68	12184	Niben101Scf02852g00013;Niben101Scf03000g01002;Niben101Scf06919g00029;Niben101Scf13308g00004
2-Oxocarboxylic acid metabolism	ko01210	3	124	68	12184	Niben101Scf00870g03002;Niben101Scf03164g07006;Niben101Scf09997g00023
Amino sugar and nucleotide sugar metabolism	ko00520	4	308	68	12184	Niben101Scf00893g01029;Niben101Scf01696g06050;Niben101Scf13118g00003;Niben101Scf13644g00002
Zeatin biosynthesis	ko00908	1	85	68	12184	Niben101Scf07089g02011
Phagosome	ko04145	1	233	68	12184	Nicotiana_benthamiana_newGene_10645
Ascorbate and aldarate metabolism	ko00053	1	96	68	12184	Niben101Scf01696g06050
Pentose and glucuronate interconversions	ko00040	1	235	68	12184	Niben101Scf07034g08030
Phenylalanine metabolism	ko00360	2	113	68	12184	Niben101Scf03164g07006;Niben101Scf09997g00023
Spliceosome	ko03040	6	520	68	12184	Niben101Scf00138g03003;Niben101Scf02771g01007;Niben101Scf03819g03027;Niben101Scf04364g01003;Niben101Scf04364g01014;Niben101Scf04886g05003
Glycolysis / Gluconeogenesis	ko00010	2	294	68	12184	Niben101Scf04078g01006;Niben101Scf05048g00010
Valine, leucine and isoleucine degradation	ko00280	2	121	68	12184	Niben101Scf00288g18013;Niben101Scf02719g00006
Peroxisome	ko04146	3	211	68	12184	Niben101Ctg14566g00003;Niben101Scf00436g05003;Niben101Scf06799g01001
Arginine and proline metabolism	ko00330	3	131	68	12184	Niben101Scf03164g07006;Niben101Scf05166g05002;Niben101Scf09997g00023
Galactose metabolism	ko00052	1	125	68	12184	Niben101Scf04632g03004
Flavonoid biosynthesis	ko00941	2	88	68	12184	Niben101Scf00536g15017;Niben101Scf04388g02019
Ubiquitin mediated proteolysis	ko04120	1	312	68	12184	Niben101Scf05528g01009
Oxidative phosphorylation	ko00190	4	793	68	12184	Niben101Scf00149g02017;Niben101Scf04096g01008;Nicotiana_benthamiana_newGene_10645;Nicotiana_benthamiana_newGene_3219
Diterpenoid biosynthesis	ko00904	1	68	68	12184	Niben101Scf01517g04011
Biosynthesis of amino acids	ko01230	4	566	68	12184	Niben101Scf00870g03002;Niben101Scf03164g07006;Niben101Scf09997g00023;Niben101Scf10152g01008
Starch and sucrose metabolism	ko00500	7	525	68	12184	Niben101Scf00893g01029;Niben101Scf01181g01007;Niben101Scf04632g03004;Niben101Scf07034g08030;Niben101Scf13118g00003;Niben101Scf13289g02018;Niben101Scf13644g00002
Lysine degradation	ko00310	1	61	68	12184	Niben101Scf02705g02021
Phenylalanine, tyrosine and tryptophan biosynthesis	ko00400	3	108	68	12184	Niben101Scf03164g07006;Niben101Scf09997g00023;Niben101Scf10152g01008
Fatty acid degradation	ko00071	1	76	68	12184	Niben101Scf04078g01006
Fatty acid elongation	ko00062	1	68	68	12184	Niben101Scf08351g04011
mRNA surveillance pathway	ko03015	4	305	68	12184	Niben101Scf00571g05009;Niben101Scf02111g11033;Niben101Scf03223g02002;Niben101Scf05467g04002
Endocytosis	ko04144	4	423	68	12184	Niben101Scf02771g01007;Niben101Scf04364g01003;Niben101Scf04364g01014;Niben101Scf04886g05003
Proteasome	ko03050	2	153	68	12184	Niben101Scf10438g00008;Niben101Scf11706g00008
alpha-Linolenic acid metabolism	ko00592	1	88	68	12184	Niben101Scf02688g02014
Non-homologous end-joining	ko03450	1	25	68	12184	Niben101Scf09516g00022
Sphingolipid metabolism	ko00600	1	66	68	12184	Niben101Scf11399g00011
Isoquinoline alkaloid biosynthesis	ko00950	2	61	68	12184	Niben101Scf03164g07006;Niben101Scf09997g00023
Alanine, aspartate and glutamate metabolism	ko00250	7	132	68	12184	Niben101Scf00288g18013;Niben101Scf00573g01003;Niben101Scf00870g03002;Niben101Scf02719g00006;Niben101Scf03164g07006;Niben101Scf05166g05002;Niben101Scf09997g00023
Glyoxylate and dicarboxylate metabolism	ko00630	2	210	68	12184	Niben101Scf01991g05012;Niben101Scf02381g04022
Tyrosine metabolism	ko00350	4	91	68	12184	Niben101Scf03164g07006;Niben101Scf04078g01006;Niben101Scf06556g07002;Niben101Scf09997g00023

## Sheet: turquoise
Supplementary Table 9. KEGG pathway analysis of DEGs of modules.
KEGG pathway	KEGG pathway ID	DEG number in specified annotation KEGG pathways	All gene number in specified annotation KEGG pathways.	DEG number in all annotation KEGG pathways.	All gene number in all annotation KEGG pathways.	DEG IDs in specified annotation KEGG pathways
Protein processing in endoplasmic reticulum	ko04141	3	549	154	12184	Niben101Scf01027g00003;Niben101Scf01374g07002;Niben101Scf05336g00011	K04079+K14004+K07953
Purine metabolism	ko00230	5	462	154	12184	Niben101Scf00417g00008;Niben101Scf01073g04022;Niben101Scf01188g10004;Niben101Scf02510g05023;Niben101Scf08137g03002	K00873+K02321+K00940+K02326+K02325
Terpenoid backbone biosynthesis	ko00900	2	124	154	12184	Niben101Scf02387g03005;Niben101Scf02399g01011	K13789+K01662
Fatty acid degradation	ko00071	1	76	154	12184	Niben101Scf05385g03007	K00121
Glyoxylate and dicarboxylate metabolism	ko00630	7	210	154	12184	Niben101Ctg10591g00003;Niben101Scf00622g00006;Niben101Scf00824g00002;Niben101Scf01125g01006;Niben101Scf02156g15009;Niben101Scf03287g00008;Niben101Scf14996g00009	K03781+K11517+K01915+K02437+K02437+K15919+K03781
Tryptophan metabolism	ko00380	4	79	154	12184	Niben101Ctg10591g00003;Niben101Scf00661g00002;Niben101Scf14996g00009;Niben101Scf18612g00001	K03781+K11820+K03781+K16903
Thiamine metabolism	ko00730	1	24	154	12184	Niben101Scf02399g01011	K01662
Valine, leucine and isoleucine degradation	ko00280	1	121	154	12184	Niben101Scf04011g00009	K00827
Base excision repair	ko03410	7	98	154	12184	Niben101Scf01388g00004;Niben101Scf02510g05023;Niben101Scf07672g00014;Niben101Scf07672g00015;Niben101Scf08137g03002;Niben101Scf10384g02008;Niben101Scf12410g00018	K10798+K02326+K04802+K04802+K02325+K04802+K10798
Sesquiterpenoid and triterpenoid biosynthesis	ko00909	1	34	154	12184	Niben101Scf00739g04029	K15813
Endocytosis	ko04144	1	423	154	12184	Niben101Scf05617g01020	K07904
Amino sugar and nucleotide sugar metabolism	ko00520	5	308	154	12184	Niben101Ctg12072g00001;Niben101Scf00432g02007;Niben101Scf01258g02001;Niben101Scf03056g00006;Niben101Scf09403g00017	K00847+K08678+K00847+K13379+K08678
Pentose phosphate pathway	ko00030	4	124	154	12184	Niben101Scf04656g00006;Niben101Scf05047g04009;Niben101Scf05226g08016;Niben101Scf09014g01003	K00615+K00895+K00895+K01623
Ribosome	ko03010	11	1031	154	12184	Niben101Scf01478g00014;Niben101Scf02437g02020;Niben101Scf03595g10007;Niben101Scf04323g04023;Niben101Scf04624g00012;Niben101Scf05583g00006;Niben101Scf06848g10001;Niben101Scf07008g00005;Niben101Scf10431g00014;Niben101Scf16244g02026;Niben101Scf38997g00004	K02942+K02961+K02942+K02975+K02943+K02880+K02989+K02922+K02958+K02958+K02891
Plant hormone signal transduction	ko04075	14	646	154	12184	Niben101Scf00152g20002;Niben101Scf01221g00001;Niben101Scf02832g01021;Niben101Scf03652g03003;Niben101Scf03713g00001;Niben101Scf04732g01028;Niben101Scf05232g02012;Niben101Scf05643g01012;Niben101Scf07465g02002;Niben101Scf07761g02006;Niben101Scf10124g01002;Niben101Scf13549g00004;Niben101Scf15451g00001;Niben101Scf33211g00002	K14486+K14484+K14505+K14484+K14505+K14500+K14484+K14505+K14486+K14516+K14484+K14490+K14516+K13946
Starch and sucrose metabolism	ko00500	14	525	154	12184	Niben101Ctg12072g00001;Niben101Scf00286g05014;Niben101Scf00432g02007;Niben101Scf00456g00010;Niben101Scf01258g02001;Niben101Scf02854g08010;Niben101Scf02949g15002;Niben101Scf04910g01004;Niben101Scf05588g08004;Niben101Scf06412g03016;Niben101Scf06933g01002;Niben101Scf08478g02009;Niben101Scf09403g00017;Niben101Scf21401g00003	K00847+K05349+K08678+K05350+K00847+K19891+K01051+K00695+K05349+K01051+K00695+K00696+K08678+K01179
Tyrosine metabolism	ko00350	2	91	154	12184	Niben101Scf05385g03007;Niben101Scf08156g01001	K00121+K00422
2-Oxocarboxylic acid metabolism	ko01210	1	124	154	12184	Niben101Scf00661g00002	K11820
Flavone and flavonol biosynthesis	ko00944	1	4	154	12184	Niben101Scf00974g01018	K05280
Peroxisome	ko04146	4	211	154	12184	Niben101Ctg10591g00003;Niben101Scf00163g08018;Niben101Scf00622g00006;Niben101Scf14996g00009	K03781+K04564+K11517+K03781
Arginine and proline metabolism	ko00330	4	131	154	12184	Niben101Scf00593g04019;Niben101Scf02738g01016;Niben101Scf03111g00003;Niben101Scf03865g03002	K00294+K00318+K12259+K01581
Glucosinolate biosynthesis	ko00966	1	6	154	12184	Niben101Scf00661g00002	K11820
Biosynthesis of amino acids	ko01230	6	566	154	12184	Niben101Scf00417g00008;Niben101Scf00824g00002;Niben101Scf04656g00006;Niben101Scf09014g01003;Niben101Scf10126g00007;Niben101Scf12280g01013	K00873+K01915+K00615+K01623+K15227+K00134
Plant-pathogen interaction	ko04626	1	403	154	12184	Niben101Scf01027g00003	K04079
Glycerolipid metabolism	ko00561	1	148	154	12184	Niben101Scf25069g01006	K13508
RNA transport	ko03013	2	449	154	12184	Niben101Scf01374g07002;Niben101Scf06318g00005	K14004+K14293
Carbon fixation in photosynthetic organisms	ko00710	4	199	154	12184	Niben101Scf04046g00008;Niben101Scf04656g00006;Niben101Scf09014g01003;Niben101Scf12280g01013	K00029+K00615+K01623+K00134
Phenylpropanoid biosynthesis	ko00940	11	429	154	12184	Niben101Scf00286g05014;Niben101Scf00456g00010;Niben101Scf01453g06003;Niben101Scf01721g07003;Niben101Scf02907g06028;Niben101Scf03460g04004;Niben101Scf03990g00010;Niben101Scf05588g08004;Niben101Scf05649g01008;Niben101Scf06602g00001;Niben101Scf08338g00001	K05349+K05350+K00430+K00430+K00083+K00430+K00430+K05349+K00430+K00430+K00430
Nicotinate and nicotinamide metabolism	ko00760	1	50	154	12184	Niben101Scf05955g03003	K18551
Cutin, suberine and wax biosynthesis	ko00073	1	61	154	12184	Niben101Scf02831g08009	K15403
Pyrimidine metabolism	ko00240	7	370	154	12184	Niben101Scf00369g21009;Niben101Scf00652g01007;Niben101Scf01073g04022;Niben101Scf01188g10004;Niben101Scf01987g01006;Niben101Scf02510g05023;Niben101Scf08137g03002	K01520+K01520+K02321+K00940+K00857+K02326+K02325
ABC transporters	ko02010	2	61	154	12184	Niben101Scf01326g05006;Niben101Scf06172g04005	K05658+K05658
Alanine, aspartate and glutamate metabolism	ko00250	3	132	154	12184	Niben101Scf00593g04019;Niben101Scf00824g00002;Niben101Scf04011g00009	K00294+K01915+K00827
Isoquinoline alkaloid biosynthesis	ko00950	1	61	154	12184	Niben101Scf08156g01001	K00422
Nitrogen metabolism	ko00910	1	84	154	12184	Niben101Scf00824g00002	K01915
Fructose and mannose metabolism	ko00051	5	154	154	12184	Niben101Ctg12072g00001;Niben101Scf01258g02001;Niben101Scf05047g04009;Niben101Scf05226g08016;Niben101Scf09014g01003	K00847+K00847+K00895+K00895+K01623
Homologous recombination	ko03440	5	149	154	12184	Niben101Scf00911g01004;Niben101Scf01429g00010;Niben101Scf01438g04009;Niben101Scf07325g00030;Niben101Scf07424g02022	K10739+K10739+K10739+K07466+K10882
Ribosome biogenesis in eukaryotes	ko03008	6	214	154	12184	Niben101Scf00005g01008;Niben101Scf02015g01022;Niben101Scf02395g02002;Niben101Scf02632g03006;Niben101Scf07048g02008;Niben101Scf12318g00006	K14544+K11128+K11131+K11129+K11128+K11128
Phagosome	ko04145	3	233	154	12184	Niben101Scf01326g05008;Niben101Scf03647g03024;Niben101Scf06172g04003	K07374+K07375+K07374
Basal transcription factors	ko03022	1	94	154	12184	Niben101Scf01150g03001	K10842
Photosynthesis	ko00195	1	405	154	12184	Niben101Scf02510g04002	K02639
Phenylalanine, tyrosine and tryptophan biosynthesis	ko00400	1	108	154	12184	Niben101Scf10126g00007	K15227
Carotenoid biosynthesis	ko00906	1	75	154	12184	Niben101Scf01873g01004	K09843
Flavonoid biosynthesis	ko00941	3	88	154	12184	Niben101Scf00974g01018;Niben101Scf01146g13015;Niben101Scf05989g01008	K05280+K00660+K01859
Glycolysis / Gluconeogenesis	ko00010	6	294	154	12184	Niben101Scf00417g00008;Niben101Scf05047g04009;Niben101Scf05226g08016;Niben101Scf05385g03007;Niben101Scf09014g01003;Niben101Scf12280g01013	K00873+K00895+K00895+K00121+K01623+K00134
Mismatch repair	ko03430	7	131	154	12184	Niben101Scf00911g01004;Niben101Scf01429g00010;Niben101Scf01438g04009;Niben101Scf07325g00030;Niben101Scf07672g00014;Niben101Scf07672g00015;Niben101Scf10384g02008	K10739+K10739+K10739+K07466+K04802+K04802+K04802
Circadian rhythm - plant	ko04712	3	94	154	12184	Niben101Scf01146g13015;Niben101Scf08702g02005;Niben101Scf11126g02001	K00660+K16223+K16223
Lysine degradation	ko00310	1	61	154	12184	Niben101Scf06187g01028	K11420
Pentose and glucuronate interconversions	ko00040	5	235	154	12184	Niben101Scf01220g02011;Niben101Scf01687g05002;Niben101Scf02949g15002;Niben101Scf06412g03016;Niben101Scf11814g00004	K01728+K01728+K01051+K01051+K01728
Ubiquitin mediated proteolysis	ko04120	3	312	154	12184	Niben101Scf03203g02001;Niben101Scf09242g02014;Niben101Scf12320g03008	K03364+K03363+K06688
RNA degradation	ko03018	1	269	154	12184	Niben101Scf01372g05004	K12581
Glutathione metabolism	ko00480	3	180	154	12184	Niben101Scf03263g03004;Niben101Scf03865g03002;Niben101Scf11767g02018	K00799+K01581+K00799
Cyanoamino acid metabolism	ko00460	3	110	154	12184	Niben101Scf00286g05014;Niben101Scf00456g00010;Niben101Scf05588g08004	K05349+K05350+K05349
Spliceosome	ko03040	3	520	154	12184	Niben101Scf01782g05006;Niben101Scf10616g01013;Niben101Scf24868g00004	K11087+K12741+K11086
Glycine, serine and threonine metabolism	ko00260	4	182	154	12184	Niben101Scf01125g01006;Niben101Scf02156g15009;Niben101Scf03287g00008;Niben101Scf04011g00009	K02437+K02437+K15919+K00827
Steroid biosynthesis	ko00100	3	76	154	12184	Niben101Scf01718g07005;Niben101Scf03969g04003;Nicotiana_benthamiana_newGene_18521	K08242+K09828+K00559
beta-Alanine metabolism	ko00410	1	102	154	12184	Niben101Scf03111g00003	K12259
Glycerophospholipid metabolism	ko00564	3	207	154	12184	Niben101Scf00123g06029;Niben101Scf12266g00001;Niben101Scf25069g01006	K06130+K06130+K13508
mRNA surveillance pathway	ko03015	1	305	154	12184	Niben101Scf10343g01001	K06269
Fatty acid elongation	ko00062	1	68	154	12184	Niben101Scf08351g04013	K15397
Pyruvate metabolism	ko00620	2	216	154	12184	Niben101Scf00417g00008;Niben101Scf04046g00008	K00873+K00029
SNARE interactions in vesicular transport	ko04130	2	95	154	12184	Niben101Scf02767g04005;Niben101Scf07404g04001	K08486+K08486
Nucleotide excision repair	ko03420	10	175	154	12184	Niben101Scf00911g01004;Niben101Scf01150g03001;Niben101Scf01429g00010;Niben101Scf01438g04009;Niben101Scf02510g05023;Niben101Scf07325g00030;Niben101Scf07672g00014;Niben101Scf07672g00015;Niben101Scf08137g03002;Niben101Scf10384g02008	K10739+K10842+K10739+K10739+K02326+K07466+K04802+K04802+K02325+K04802
Selenocompound metabolism	ko00450	1	62	154	12184	Nicotiana_benthamiana_newGene_12747	K01761
Arginine biosynthesis	ko00220	1	72	154	12184	Niben101Scf00824g00002	K01915
DNA replication	ko03030	15	157	154	12184	Niben101Scf00911g01004;Niben101Scf01073g04022;Niben101Scf01429g00010;Niben101Scf01438g04009;Niben101Scf02510g05023;Niben101Scf02693g02014;Niben101Scf07325g00030;Niben101Scf07672g00014;Niben101Scf07672g00015;Niben101Scf07728g02014;Niben101Scf08137g03002;Niben101Scf08240g01016;Niben101Scf10122g01005;Niben101Scf10384g02008;Niben101Scf11936g01017	K10739+K02321+K10739+K10739+K02326+K02210+K07466+K04802+K04802+K02541+K02325+K10743+K02542+K04802+K02209
Photosynthesis - antenna proteins	ko00196	1	80	154	12184	Niben101Ctg14049g00002	K08912
Carbon metabolism	ko01200	10	652	154	12184	Niben101Ctg10591g00003;Niben101Scf00417g00008;Niben101Scf00622g00006;Niben101Scf03287g00008;Niben101Scf04046g00008;Niben101Scf04656g00006;Niben101Scf05385g03007;Niben101Scf09014g01003;Niben101Scf12280g01013;Niben101Scf14996g00009	K03781+K00873+K11517+K15919+K00029+K00615+K00121+K01623+K00134+K03781
Cysteine and methionine metabolism	ko00270	5	260	154	12184	Niben101Scf02543g01008;Niben101Scf03226g01003;Niben101Scf04011g00009;Niben101Scf32212g00015;Nicotiana_benthamiana_newGene_12747	K05933+K20772+K00827+K00558+K01761
Glycosaminoglycan degradation	ko00531	2	35	154	12184	Niben101Scf06809g00033;Niben101Scf09107g00007	K10532+K07964

## Sheet: yellow
Supplementary Table 9. KEGG pathway analysis of DEGs of modules.
KEGG pathway	KEGG pathway ID	DEG number in specified annotation KEGG pathways	All gene number in specified annotation KEGG pathways.	DEG number in all annotation KEGG pathways.	All gene number in all annotation KEGG pathways.	DEG IDs in specified annotation KEGG pathways
Carbon metabolism	ko01200	1	652	11	12184	Niben101Scf00578g03001
Amino sugar and nucleotide sugar metabolism	ko00520	2	308	11	12184	Niben101Scf00279g01014;Niben101Scf02041g00002
Starch and sucrose metabolism	ko00500	2	525	11	12184	Niben101Scf00279g01014;Niben101Scf01623g01028
Plant hormone signal transduction	ko04075	1	646	11	12184	Niben101Scf00107g03008
Pentose phosphate pathway	ko00030	1	124	11	12184	Niben101Scf00578g03001
Biosynthesis of amino acids	ko01230	1	566	11	12184	Niben101Scf03801g00003
Monoterpenoid biosynthesis	ko00902	1	15	11	12184	Niben101Scf02497g01020
Arginine and proline metabolism	ko00330	1	131	11	12184	Niben101Scf03801g00003
Stilbenoid, diarylheptanoid and gingerol biosynthesis	ko00945	1	61	11	12184	Nicotiana_benthamiana_newGene_17267
Flavonoid biosynthesis	ko00941	1	88	11	12184	Nicotiana_benthamiana_newGene_17267
ABC transporters	ko02010	1	61	11	12184	Niben101Scf07442g00008
Phenylpropanoid biosynthesis	ko00940	2	429	11	12184	Niben101Scf08670g00028;Nicotiana_benthamiana_newGene_17267
Zeatin biosynthesis	ko00908	1	85	11	12184	Niben101Scf04404g05001
Plant-pathogen interaction	ko04626	1	403	11	12184	Niben101Scf00107g03008
