# Supplementary material for: Reactive oxygen species-related genes participate in resistance to cucumber green mottle mosaic virus infection regulated by boron in Nicotiana benthamiana and watermelon
Source: Front Plant Sci. 2022 Nov 11;13:1027404. doi: 10.3389/fpls.2022.1027404 (PMC9691971; doi:10.3389/fpls.2022.1027404)
Supplement: Supplementary file 11 [file Table_10.xlsx]

## Sheet: inositol phosphate metabolism
Supplementary Table 10. DEGs of various biological functional classifications.
inositol phosphate metabolism	Gene abbreviation	Gene ID	Gene_name	P+B-1	P+B-2	P+B-3	C+H-1	C+H-2	C+H-3	C+B-1	C+B-2	C+B-3	P+H-1	P+H-2	P+H-3	P+B-1_P+B-2_P+B-3_vs._C+B-1_C+B-2_C+B-3_DESeq2_FDR	P+B-1_P+B-2_P+B-3_vs._C+B-1_C+B-2_C+B-3_DESeq2_log2FC	P+B-1_P+B-2_P+B-3_vs._C+B-1_C+B-2_C+B-3_DESeq2_(FDR_0.05_FC_2)_regulated	C+H-1_C+H-2_C+H-3_vs._C+B-1_C+B-2_C+B-3_DESeq2_FDR	C+H-1_C+H-2_C+H-3_vs._C+B-1_C+B-2_C+B-3_DESeq2_log2FC	C+H-1_C+H-2_C+H-3_vs._C+B-1_C+B-2_C+B-3_DESeq2_(FDR_0.05_FC_2)_regulated	P+H-1_P+H-2_P+H-3_vs._P+B-1_P+B-2_P+B-3_DESeq2_FDR	P+H-1_P+H-2_P+H-3_vs._P+B-1_P+B-2_P+B-3_DESeq2_log2FC	P+H-1_P+H-2_P+H-3_vs._P+B-1_P+B-2_P+B-3_DESeq2_(FDR_0.05_FC_2)_regulated	P+H-1_P+H-2_P+H-3_vs._C+H-1_C+H-2_C+H-3_DESeq2_FDR	P+H-1_P+H-2_P+H-3_vs._C+H-1_C+H-2_C+H-3_DESeq2_log2FC	P+H-1_P+H-2_P+H-3_vs._C+H-1_C+H-2_C+H-3_DESeq2_(FDR_0.05_FC_2)_regulated	P+H-1_P+H-2_P+H-3_vs._C+B-1_C+B-2_C+B-3_DESeq2_FDR	P+H-1_P+H-2_P+H-3_vs._C+B-1_C+B-2_C+B-3_DESeq2_log2FC	P+H-1_P+H-2_P+H-3_vs._C+B-1_C+B-2_C+B-3_DESeq2_(FDR_0.05_FC_2)_regulated	COG_class	COG_class_annotation	GO_annotation	KEGG_annotation	KEGG_pathway_annotation	KOG_class	KOG_class_annotation	Pfam_annotation	Swiss_Prot_annotation	Swiss_Prot_annotation	eggNOG_class_annotation	NR_annotation	GO_second_level_annotation
	INPP5E	Niben101Scf01444g00001	Niben101Scf01444g00001	0.399571	0.423384	0.3215	2.6162	1.98795	4.2529	1.60335	0.942327	3.03102	0.297177	0.370134	0.203454	5.99503e-05	1.4078	up	0.432536	-0.450497	normal	--	--	--	6.83797e-13	2.53238	up	2.07345e-06	1.68567	up	--	--	Molecular Function: hydrolase activity (GO:0016787);; Biological Process: phosphatidylinositol dephosphorylation (GO:0046856);;	--	--	[U]	Intracellular trafficking, secretion, and vesicular transport	Endonuclease/Exonuclease/phosphatase family	Type I inositol polyphosphate 5-phosphatase 8 OS=Arabidopsis thaliana OX=3702 GN=IP5P8 PE=2 SV=1	Type I inositol polyphosphate 5-phosphatase 8 OS=Arabidopsis thaliana OX=3702 GN=IP5P8 PE=2 SV=2	Signal transduction mechanisms	PREDICTED: type I inositol polyphosphate 5-phosphatase 8-like isoform X1 [Nicotiana attenuata]	molecular function: catalytic activity (GO:0003824);; biological process: metabolic process (GO:0008152);; biological process: cellular process (GO:0009987);; biological process: single-organism process (GO:0044699)
	INT	Niben101Scf03932g07004	Niben101Scf03932g07004	4.70118	0.465339	0.361511	1.44827	0.54703	3.94105	4.59638	4.62201	1.33459	0.891858	1.32043	1.02512	0.783207	0.168909	normal	0.421942	0.521031	normal	0.889717	0.0719032	normal	0.599414	0.340681	normal	0.00752295	1.02142	up	[G]	Carbohydrate transport and metabolism	Biological Process: transport (GO:0006810);; Cellular Component: membrane (GO:0016020);; Molecular Function: transmembrane transporter activity (GO:0022857);;	K08150|0|atr:18427244|K08150 MFS transporter, SP family, solute carrier family 2 (myo-inositol transporter), member 13 | (RefSeq) probable inositol transporter 2	--	[R]	General function prediction only	Sugar (and other) transporter;; Major Facilitator Superfamily	Probable inositol transporter 2 OS=Arabidopsis thaliana OX=3702 GN=INT2 PE=1 SV=1	Probable inositol transporter 2 OS=Arabidopsis thaliana OX=3702 GN=INT2 PE=1 SV=2	Carbohydrate transport and metabolism	Sugar/inositol transporter [Macleaya cordata]	biological process: localization (GO:0051179);; cellular component: membrane (GO:0016020);; molecular function: transporter activity (GO:0005215)
	InsP3	Niben101Scf14542g00032	Niben101Scf14542g00032	6.84831	6.26676	7.11942	6.51926	4.81155	5.36386	13.8377	15.4581	9.74338	7.08336	7.57217	8.64977	0.00459711	0.643385	normal	4.65092e-06	1.1683	up	0.399068	-0.248336	normal	6.41788e-05	-0.870339	normal	0.135358	0.374885	normal	--	--	Molecular Function: hydrolase activity (GO:0016787);; Biological Process: phosphatidylinositol dephosphorylation (GO:0046856);;	--	--	[U]	Intracellular trafficking, secretion, and vesicular transport	--	Type I inositol polyphosphate 5-phosphatase 2 OS=Arabidopsis thaliana OX=3702 GN=IP5P2 PE=1 SV=2	Type I inositol polyphosphate 5-phosphatase 2 OS=Arabidopsis thaliana OX=3702 GN=IP5P2 PE=1 SV=3	Signal transduction mechanisms	PREDICTED: type I inositol 1,4,5-trisphosphate 5-phosphatase 2-like isoform X1 [Nicotiana sylvestris]	molecular function: catalytic activity (GO:0003824);; biological process: metabolic process (GO:0008152);; biological process: cellular process (GO:0009987);; biological process: single-organism process (GO:0044699)
	TPI	Niben101Scf08794g00003	Niben101Scf08794g00003	0.649189	0.652664	0.299324	0.824311	0.857955	0.933776	0.588682	0.66964	0.670524	0.216261	0.368666	0.194489	--	--	--	0.667326	-0.274029	normal	--	--	--	0.0417908	1.00819	up	--	--	--	[G]	Carbohydrate transport and metabolism	Molecular Function: triose-phosphate isomerase activity (GO:0004807);; Cellular Component: cytosol (GO:0005829);; Biological Process: gluconeogenesis (GO:0006094);; Biological Process: glycolytic process (GO:0006096);; Biological Process: glycerol catabolic process (GO:0019563);; Biological Process: glyceraldehyde-3-phosphate biosynthetic process (GO:0046166);;	K01803|7.29481e-78|sot:102577900|K01803 triosephosphate isomerase (TIM) [EC:5.3.1.1] | (RefSeq) triosphosphate isomerase-like protein	Glycolysis / Gluconeogenesis (ko00010);; Fructose and mannose metabolism (ko00051);; Inositol phosphate metabolism (ko00562);; Carbon fixation in photosynthetic organisms (ko00710);; Carbon metabolism (ko01200);; Biosynthesis of amino acids (ko01230)	[G]	Carbohydrate transport and metabolism	Triosephosphate isomerase	Triosephosphate isomerase, cytosolic OS=Petunia hybrida OX=4102 GN=TPIP1 PE=2 SV=1	Triosephosphate isomerase, cytosolic OS=Petunia hybrida OX=4102 GN=TPIP1 PE=2 SV=2	Carbohydrate transport and metabolism	PREDICTED: triosephosphate isomerase, cytosolic-like [Nicotiana sylvestris]	molecular function: catalytic activity (GO:0003824);; cellular component: cell (GO:0005623);; cellular component: cell part (GO:0044464);; biological process: metabolic process (GO:0008152);; biological process: single-organism process (GO:0044699);; biological process: cellular process (GO:0009987)
	IPS	Niben101Scf02023g01002	Niben101Scf02023g01002	216.662	167.335	117.441	118.144	87.6198	146.879	265.504	195.178	181.386	199.831	163.201	182.979	0.804004	0.108573	normal	0.00268809	0.843729	normal	0.703944	-0.177663	normal	1.40837e-05	-1.01692	down	0.732218	-0.108344	normal	[I]	Lipid transport and metabolism	Molecular Function: inositol-3-phosphate synthase activity (GO:0004512);; Cellular Component: cytoplasm (GO:0005737);; Biological Process: inositol biosynthetic process (GO:0006021);; Biological Process: phospholipid biosynthetic process (GO:0008654);;	K01858|0|spen:107020459|K01858 myo-inositol-1-phosphate synthase [EC:5.5.1.4] | (RefSeq) inositol-3-phosphate synthase-like	Inositol phosphate metabolism (ko00562)	[I]	Lipid transport and metabolism	Myo-inositol-1-phosphate synthase;; Myo-inositol-1-phosphate synthase	Inositol-3-phosphate synthase OS=Nicotiana tabacum OX=4097 PE=2 SV=1	Inositol-3-phosphate synthase OS=Nicotiana tabacum OX=4097 PE=2 SV=2	Lipid transport and metabolism	PREDICTED: inositol-3-phosphate synthase-like [Nicotiana attenuata]	molecular function: catalytic activity (GO:0003824);; cellular component: cell (GO:0005623);; cellular component: cell part (GO:0044464);; biological process: metabolic process (GO:0008152);; biological process: cellular process (GO:0009987);; biological process: single-organism process (GO:0044699)
	IPS	Niben101Scf06016g08006	Niben101Scf06016g08006	1384.22	1055.35	881.206	649.759	451.064	686.287	1584.58	837.293	1026.03	1501.49	1211.37	1072.8	0.696622	-0.164882	normal	0.00431578	0.893283	normal	0.520749	-0.234089	normal	4.04041e-10	-1.44185	down	0.1207	-0.439243	normal	[I]	Lipid transport and metabolism	Molecular Function: inositol-3-phosphate synthase activity (GO:0004512);; Cellular Component: cytoplasm (GO:0005737);; Biological Process: inositol biosynthetic process (GO:0006021);; Biological Process: phospholipid biosynthetic process (GO:0008654);;	K01858|0|sot:102598817|K01858 myo-inositol-1-phosphate synthase [EC:5.5.1.4] | (RefSeq) inositol-3-phosphate synthase	Inositol phosphate metabolism (ko00562)	[I]	Lipid transport and metabolism	Myo-inositol-1-phosphate synthase;; Myo-inositol-1-phosphate synthase	Inositol-3-phosphate synthase OS=Nicotiana tabacum OX=4097 PE=2 SV=1	Inositol-3-phosphate synthase OS=Nicotiana tabacum OX=4097 PE=2 SV=2	Lipid transport and metabolism	PREDICTED: inositol-3-phosphate synthase [Nicotiana tomentosiformis]	molecular function: catalytic activity (GO:0003824);; cellular component: cell (GO:0005623);; cellular component: cell part (GO:0044464);; biological process: metabolic process (GO:0008152);; biological process: cellular process (GO:0009987);; biological process: single-organism process (GO:0044699)
	IPS	Niben101Scf16254g00008	Niben101Scf16254g00008	727.947	435.687	381.736	324.275	168.617	394.019	929.052	558.678	520.051	768.523	554.038	498.413	0.809616	0.122405	normal	0.00395838	1.03562	up	0.799734	-0.176702	normal	1.13304e-05	-1.34724	down	0.613052	-0.188724	normal	[I]	Lipid transport and metabolism	Molecular Function: inositol-3-phosphate synthase activity (GO:0004512);; Cellular Component: cytoplasm (GO:0005737);; Biological Process: inositol biosynthetic process (GO:0006021);; Biological Process: phospholipid biosynthetic process (GO:0008654);;	K01858|0|sot:102598817|K01858 myo-inositol-1-phosphate synthase [EC:5.5.1.4] | (RefSeq) inositol-3-phosphate synthase	Inositol phosphate metabolism (ko00562)	[I]	Lipid transport and metabolism	Myo-inositol-1-phosphate synthase;; Myo-inositol-1-phosphate synthase	Inositol-3-phosphate synthase OS=Nicotiana paniculata OX=62141 GN=INPS1 PE=2 SV=1	Inositol-3-phosphate synthase OS=Nicotiana paniculata OX=62141 GN=INPS1 PE=2 SV=2	Lipid transport and metabolism	PREDICTED: inositol-3-phosphate synthase [Nicotiana tomentosiformis]	molecular function: catalytic activity (GO:0003824);; cellular component: cell (GO:0005623);; cellular component: cell part (GO:0044464);; biological process: metabolic process (GO:0008152);; biological process: cellular process (GO:0009987);; biological process: single-organism process (GO:0044699)
	PI4K	Niben101Scf10818g00020	Niben101Scf10818g00020	0.294714	0.380758	0.416268	0.489958	0.927235	0.686003	0.525548	0.587505	0.515173	0.180071	0.253653	0.207367	0.490689	0.278889	normal	0.601635	-0.247207	normal	0.309765	0.415384	normal	0.000224137	1.15815	up	0.00191316	0.877927	normal	--	--	Biological Process: phosphorylation (GO:0016310);; Molecular Function: transferase activity (GO:0016740);; Biological Process: single-organism process (GO:0044699);;	K00888|0|sot:102594185|K00888 phosphatidylinositol 4-kinase A [EC:2.7.1.67] | (RefSeq) phosphatidylinositol 4-kinase alpha 1	Inositol phosphate metabolism (ko00562);; Phosphatidylinositol signaling system (ko04070)	[T]	Signal transduction mechanisms	--	Phosphatidylinositol 4-kinase alpha 1 OS=Arabidopsis thaliana OX=3702 GN=PI4KA1 PE=1 SV=2	Phosphatidylinositol 4-kinase alpha 1 OS=Arabidopsis thaliana OX=3702 GN=PI4KA1 PE=1 SV=3	Function unknown	PREDICTED: phosphatidylinositol 4-kinase alpha 1-like isoform X2 [Nicotiana sylvestris]	biological process: metabolic process (GO:0008152);; biological process: cellular process (GO:0009987);; molecular function: catalytic activity (GO:0003824);; biological process: single-organism process (GO:0044699)
	PI-PLC	Niben101Scf02280g02004	Niben101Scf02280g02004	23.7348	24.9303	23.0157	15.6492	12.83	15.439	20.1953	18.1717	16.7658	26.2405	18.9528	24.6068	3.57828e-05	-0.601265	normal	0.136363	0.374938	normal	0.949513	-0.0437487	normal	1.619e-06	-1.06119	down	0.00160137	-0.650525	normal	--	--	Molecular Function: phosphatidylinositol phospholipase C activity (GO:0004435);; Molecular Function: signal transducer activity (GO:0004871);; Cellular Component: intracellular (GO:0005622);; Biological Process: lipid catabolic process (GO:0016042);; Biological Process: intracellular signal transduction (GO:0035556);;	K05857|0|sot:102588383|K05857 phosphatidylinositol phospholipase C, delta [EC:3.1.4.11] | (RefSeq) plc3; phosphoinositide phospholipase C 2-like	Inositol phosphate metabolism (ko00562);; Phosphatidylinositol signaling system (ko04070);; AGE-RAGE signaling pathway in diabetic complications (ko04933)	[T]	Signal transduction mechanisms	Phosphatidylinositol-specific phospholipase C, X domain;; Phosphatidylinositol-specific phospholipase C, Y domain;; C2 domain;; Phosphoinositide-specific phospholipase C, efhand-like	Phosphoinositide phospholipase C 2 OS=Arabidopsis thaliana OX=3702 GN=PLC2 PE=1 SV=1	Phosphoinositide phospholipase C 2 OS=Arabidopsis thaliana OX=3702 GN=PLC2 PE=1 SV=2	Function unknown	PREDICTED: phosphoinositide phospholipase C 2-like [Nicotiana attenuata]	molecular function: catalytic activity (GO:0003824);; molecular function: signal transducer activity (GO:0004871);; cellular component: cell (GO:0005623);; cellular component: cell part (GO:0044464);; biological process: metabolic process (GO:0008152);; biological process: single-organism process (GO:0044699);; biological process: cellular process (GO:0009987);; biological process: signaling (GO:…
	PI-PLC	Niben101Scf11417g00013	Niben101Scf11417g00013	14.5064	14.097	17.5422	11.0427	12.4979	10.8946	27.5864	21.8015	20.653	14.7914	13.2005	16.3811	0.180914	0.327687	normal	1.1633e-08	1.04395	up	0.97926	-0.0209095	normal	1.31935e-05	-0.785551	normal	0.211737	0.293531	normal	--	--	Molecular Function: phosphatidylinositol phospholipase C activity (GO:0004435);; Molecular Function: signal transducer activity (GO:0004871);; Cellular Component: intracellular (GO:0005622);; Biological Process: lipid catabolic process (GO:0016042);; Biological Process: intracellular signal transduction (GO:0035556);;	K05857|0|sot:102596402|K05857 phosphatidylinositol phospholipase C, delta [EC:3.1.4.11] | (RefSeq) phosphoinositide phospholipase C 4-like	Inositol phosphate metabolism (ko00562);; Phosphatidylinositol signaling system (ko04070);; AGE-RAGE signaling pathway in diabetic complications (ko04933)	[T]	Signal transduction mechanisms	Phosphatidylinositol-specific phospholipase C, X domain;; Phosphatidylinositol-specific phospholipase C, Y domain;; C2 domain	Phosphoinositide phospholipase C 5 OS=Arabidopsis thaliana OX=3702 GN=PLC5 PE=2 SV=2	Phosphoinositide phospholipase C 5 OS=Arabidopsis thaliana OX=3702 GN=PLC5 PE=2 SV=3	Function unknown	PREDICTED: phosphoinositide phospholipase C 4 [Nicotiana sylvestris]	molecular function: catalytic activity (GO:0003824);; molecular function: signal transducer activity (GO:0004871);; cellular component: cell (GO:0005623);; cellular component: cell part (GO:0044464);; biological process: metabolic process (GO:0008152);; biological process: single-organism process (GO:0044699);; biological process: cellular process (GO:0009987);; biological process: signaling (GO:…
	PIP5k7	Niben101Scf02122g00006	Niben101Scf02122g00006	11.2377	10.9622	12.0893	6.77548	4.95722	6.63306	9.18571	8.56445	8.75116	12.1855	9.41135	11.9195	4.33269e-05	-0.597064	normal	0.0253658	0.555594	normal	0.946529	-0.0453634	normal	5.77822e-08	-1.24212	down	0.000563097	-0.653607	normal	[S]	Function unknown	Molecular Function: ATP binding (GO:0005524);; Molecular Function: 1-phosphatidylinositol-4-phosphate 5-kinase activity (GO:0016308);; Biological Process: phosphatidylinositol phosphorylation (GO:0046854);;	K00889|0|sot:102578988|K00889 1-phosphatidylinositol-4-phosphate 5-kinase [EC:2.7.1.68] | (RefSeq) phosphatidylinositol 4-phosphate 5-kinase 8	Inositol phosphate metabolism (ko00562);; Phosphatidylinositol signaling system (ko04070);; Endocytosis (ko04144)	[T]	Signal transduction mechanisms	Phosphatidylinositol-4-phosphate 5-Kinase;; MORN repeat	Phosphatidylinositol 4-phosphate 5-kinase 8 OS=Arabidopsis thaliana OX=3702 GN=PIP5K8 PE=1 SV=1	Phosphatidylinositol 4-phosphate 5-kinase 8 OS=Arabidopsis thaliana OX=3702 GN=PIP5K8 PE=1 SV=2	Signal transduction mechanisms	PREDICTED: phosphatidylinositol 4-phosphate 5-kinase 7-like [Nicotiana sylvestris]	molecular function: binding (GO:0005488);; biological process: metabolic process (GO:0008152);; biological process: cellular process (GO:0009987);; biological process: single-organism process (GO:0044699);; molecular function: catalytic activity (GO:0003824)
	PIP5k9	Niben101Scf14010g00010	Niben101Scf14010g00010	0.696902	0.777943	0.866923	0.457341	0.68638	0.432783	0.457231	0.41036	0.336514	0.87334	0.754906	1.05597	0.00114253	-0.988324	normal	0.691167	-0.237556	normal	0.767239	-0.183584	normal	0.000530067	-1.11351	down	1.41634e-05	-1.26404	down	[S]	Function unknown	--	K00889|0|spen:107032400|K00889 1-phosphatidylinositol-4-phosphate 5-kinase [EC:2.7.1.68] | (RefSeq) ras-related protein RABC2a-like	Inositol phosphate metabolism (ko00562);; Phosphatidylinositol signaling system (ko04070);; Endocytosis (ko04144)	[T]	Signal transduction mechanisms	MORN repeat;; Phosphatidylinositol-4-phosphate 5-Kinase;; Phosphatidylinositol-4-phosphate 5-Kinase	Phosphatidylinositol 4-phosphate 5-kinase 9 OS=Arabidopsis thaliana OX=3702 GN=PIP5K9 PE=1 SV=2	Phosphatidylinositol 4-phosphate 5-kinase 9 OS=Arabidopsis thaliana OX=3702 GN=PIP5K9 PE=1 SV=3	Signal transduction mechanisms	PREDICTED: phosphatidylinositol 4-phosphate 5-kinase 9-like [Nicotiana attenuata]	--
note: P+H, PBS solution + H2O; P+B, PBS solution + boron; C+H, CGMMV + H2O; C+B, CGMMV + boron.

## Sheet: phytohormones
Supplementary Table 10. DEGs of various biological functional classifications.
Phytohormones	Gene abbreviation	Gene ID	Gene_name	P+B-1	P+B-2	P+B-3	C+H-1	C+H-2	C+H-3	C+B-1	C+B-2	C+B-3	P+H-1	P+H-2	P+H-3	P+B-1_P+B-2_P+B-3_vs._C+B-1_C+B-2_C+B-3_DESeq2_FDR	P+B-1_P+B-2_P+B-3_vs._C+B-1_C+B-2_C+B-3_DESeq2_log2FC	P+B-1_P+B-2_P+B-3_vs._C+B-1_C+B-2_C+B-3_DESeq2_(FDR_0.05_FC_2)_regulated	C+H-1_C+H-2_C+H-3_vs._C+B-1_C+B-2_C+B-3_DESeq2_FDR	C+H-1_C+H-2_C+H-3_vs._C+B-1_C+B-2_C+B-3_DESeq2_log2FC	C+H-1_C+H-2_C+H-3_vs._C+B-1_C+B-2_C+B-3_DESeq2_(FDR_0.05_FC_2)_regulated	P+H-1_P+H-2_P+H-3_vs._P+B-1_P+B-2_P+B-3_DESeq2_FDR	P+H-1_P+H-2_P+H-3_vs._P+B-1_P+B-2_P+B-3_DESeq2_log2FC	P+H-1_P+H-2_P+H-3_vs._P+B-1_P+B-2_P+B-3_DESeq2_(FDR_0.05_FC_2)_regulated	P+H-1_P+H-2_P+H-3_vs._C+H-1_C+H-2_C+H-3_DESeq2_FDR	P+H-1_P+H-2_P+H-3_vs._C+H-1_C+H-2_C+H-3_DESeq2_log2FC	P+H-1_P+H-2_P+H-3_vs._C+H-1_C+H-2_C+H-3_DESeq2_(FDR_0.05_FC_2)_regulated	P+H-1_P+H-2_P+H-3_vs._C+B-1_C+B-2_C+B-3_DESeq2_FDR	P+H-1_P+H-2_P+H-3_vs._C+B-1_C+B-2_C+B-3_DESeq2_log2FC	P+H-1_P+H-2_P+H-3_vs._C+B-1_C+B-2_C+B-3_DESeq2_(FDR_0.05_FC_2)_regulated	COG_class	COG_class_annotation	GO_annotation	KEGG_annotation	KEGG_pathway_annotation	KOG_class	KOG_class_annotation	Pfam_annotation	Swiss_Prot_annotation	eggNOG_class	eggNOG_class_annotation	NR_annotation	GO_second_level_annotation
IAA synthesis and transduction	ARPs	Niben101Scf01524g00006	Niben101Scf01524g00006	18.9707	16.7522	19.4244	17.7916	17.9232	18.6829	64.9371	34.4869	31.5756	12.201	13.7458	12.7302	0.00401259	0.84731	normal	0.000239497	1.15455	up	0.279912	0.349158	normal	0.849406	0.059734	normal	2.91471e-06	1.24291	up	--	--	Biological Process: response to auxin (GO:0009733);;	K14488|1.96921e-38|sot:107060673|K14488 SAUR family protein | (RefSeq) auxin-responsive protein SAUR32-like	Plant hormone signal transduction (ko04075)	--	--	Auxin responsive protein	Auxin-responsive protein SAUR32 OS=Arabidopsis thaliana OX=3702 GN=SAUR32 PE=2 SV=1	--	--	auxin-responsive protein saur32 [Nicotiana attenuata]	biological process: response to stimulus (GO:0050896)
	ARPs	Niben101Scf01594g00001	Niben101Scf01594g00001	1.82041	2.27792	3.35186	1.68954	1.32563	1.57537	1.10111	2.44263	2.80631	2.85176	2.81186	3.77511	--	--	--	--	--	--	0.794498	-0.179101	normal	0.00566374	-1.20127	down	0.15852	-0.638815	normal	--	--	Biological Process: response to auxin (GO:0009733);;	K14488|4.15892e-45|egr:104415968|K14488 SAUR family protein | (RefSeq) auxin-induced protein 6B-like	Plant hormone signal transduction (ko04075)	--	--	Auxin responsive protein	Auxin-responsive protein SAUR32 OS=Arabidopsis thaliana OX=3702 GN=SAUR32 PE=2 SV=1	S	Function unknown	auxin-responsive protein saur32 [Nicotiana attenuata]	biological process: response to stimulus (GO:0050896)
	ARPs	Niben101Scf01221g00001	Niben101Scf01221g00001	0.991181	1.40455	1.66008	2.38972	3.96289	2.21339	1.0537	1.34491	1.99542	1.06896	0.840033	0.931254	0.875124	-0.102832	normal	0.0893777	-0.715125	normal	0.694653	0.23454	normal	0.0029303	1.01995	up	0.653251	0.223657	normal	--	--	Cellular Component: nucleus (GO:0005634);; Biological Process: regulation of transcription, DNA-templated (GO:0006355);; Biological Process: auxin-activated signaling pathway (GO:0009734);;	K14484|2.37941e-154|spen:107029640|K14484 auxin-responsive protein IAA | (RefSeq) auxin-responsive protein IAA13	Plant hormone signal transduction (ko04075)	--	--	AUX/IAA family	Auxin-responsive protein IAA13 OS=Arabidopsis thaliana OX=3702 GN=IAA13 PE=1 SV=2	K	Transcription	PREDICTED: auxin-responsive protein IAA13 [Nicotiana sylvestris]	cellular component: cell (GO:0005623);; cellular component: organelle (GO:0043226);; cellular component: cell part (GO:0044464);; biological process: biological regulation (GO:0065007);; biological process: cellular process (GO:0009987);; biological process: signaling (GO:0023052);; biological process: single-organism process (GO:0044699);; biological process: response to stimulus (GO:0050896)
	ARPs	Niben101Scf03652g03003	Niben101Scf03652g03003	12.0464	11.1107	5.61176	27.236	29.0651	32.9421	9.95903	16.8574	16.5785	5.40713	5.29619	4.22059	0.471846	0.300621	normal	0.000512005	-0.886996	normal	0.0331575	0.607715	normal	2.44306e-34	2.08487	up	3.3575e-06	1.08535	up	--	--	Biological Process: transcription, DNA-templated (GO:0006351);; Biological Process: regulation of cellular process (GO:0050794);;	K14484|9.27732e-85|fve:101295272|K14484 auxin-responsive protein IAA | (RefSeq) auxin-responsive protein IAA14-like	Plant hormone signal transduction (ko04075)	--	--	AUX/IAA family	Auxin-responsive protein IAA14 OS=Arabidopsis thaliana OX=3702 GN=IAA14 PE=1 SV=2	K	Transcription	PREDICTED: auxin-responsive protein IAA14 [Nicotiana tomentosiformis]	biological process: metabolic process (GO:0008152);; biological process: cellular process (GO:0009987);; biological process: biological regulation (GO:0065007)
	ARPs	Niben101Scf10650g02001	Niben101Scf10650g02001	2.54385	1.84402	1.49657	2.8022	7.40968	2.87592	2.66733	2.14484	2.3476	1.22583	1.77642	1.41198	0.942608	0.0368594	normal	0.152027	-0.631928	normal	0.584721	0.250428	normal	0.00458024	1.00146	up	0.188519	0.335992	normal	--	--	Cellular Component: nucleus (GO:0005634);; Biological Process: regulation of transcription, DNA-templated (GO:0006355);; Biological Process: auxin-activated signaling pathway (GO:0009734);;	K14484|9.7899e-117|sot:102585218|K14484 auxin-responsive protein IAA | (RefSeq) auxin-responsive protein IAA26	Plant hormone signal transduction (ko04075)	--	--	AUX/IAA family	Auxin-responsive protein IAA26 OS=Arabidopsis thaliana OX=3702 GN=IAA26 PE=1 SV=2	K	Transcription	PREDICTED: auxin-responsive protein IAA26-like [Nicotiana sylvestris]	cellular component: cell (GO:0005623);; cellular component: organelle (GO:0043226);; cellular component: cell part (GO:0044464);; biological process: biological regulation (GO:0065007);; biological process: cellular process (GO:0009987);; biological process: signaling (GO:0023052);; biological process: single-organism process (GO:0044699);; biological process: response to stimulus (GO:0050896)
	ARPs	Niben101Scf02572g02001	Niben101Scf02572g02001	2.66616	2.37323	1.79312	4.06121	6.59956	4.46947	2.54856	3.64654	2.5675	1.41197	1.99585	1.80376	0.845719	0.101509	normal	0.0676756	-0.623312	normal	0.697864	0.214923	normal	7.63138e-05	1.02966	up	0.272063	0.364232	normal	--	--	Cellular Component: nucleus (GO:0005634);; Biological Process: regulation of transcription, DNA-templated (GO:0006355);; Biological Process: auxin-activated signaling pathway (GO:0009734);;	K14484|5.86934e-121|sot:102595402|K14484 auxin-responsive protein IAA | (RefSeq) auxin-responsive protein IAA27-like	Plant hormone signal transduction (ko04075)	--	--	AUX/IAA family;; AUX/IAA family	Auxin-responsive protein IAA27 OS=Arabidopsis thaliana OX=3702 GN=IAA27 PE=1 SV=1	K	Transcription	PREDICTED: auxin-responsive protein IAA27-like [Nicotiana attenuata]	cellular component: cell (GO:0005623);; cellular component: organelle (GO:0043226);; cellular component: cell part (GO:0044464);; biological process: biological regulation (GO:0065007);; biological process: cellular process (GO:0009987);; biological process: signaling (GO:0023052);; biological process: single-organism process (GO:0044699);; biological process: response to stimulus (GO:0050896)
	ARPs	Niben101Scf10124g01002	Niben101Scf10124g01002	11.8005	10.0133	16.1119	2.26125	1.04794	1.00876	13.4848	5.71664	4.82493	15.2702	19.5572	14.9555	0.0607744	-0.705258	normal	5.00936e-06	1.79267	up	0.2411	-0.368406	normal	6.57238e-35	-3.58061	down	0.000135257	-1.1609	down	--	--	Biological Process: transcription, DNA-templated (GO:0006351);; Biological Process: regulation of cellular process (GO:0050794);;	K14484|3.69757e-78|sot:102583661|K14484 auxin-responsive protein IAA | (RefSeq) auxin-responsive protein IAA20-like	Plant hormone signal transduction (ko04075)	--	--	AUX/IAA family	Auxin-responsive protein IAA29 OS=Arabidopsis thaliana OX=3702 GN=IAA29 PE=1 SV=2	S	Function unknown	PREDICTED: auxin-responsive protein IAA29-like [Nicotiana sylvestris]	biological process: metabolic process (GO:0008152);; biological process: cellular process (GO:0009987);; biological process: biological regulation (GO:0065007)
	ARPs	Niben101Scf03759g00001	Niben101Scf03759g00001	5.20808	2.78967	5.89433	3.41801	2.61652	4.41961	3.90927	1.64294	0.815054	4.59553	5.07699	4.35566	0.0702407	-0.807907	normal	0.576292	-0.388627	normal	0.965015	-0.0444572	normal	0.0407445	-0.75859	normal	0.0143222	-1.0111	down	--	--	Biological Process: response to auxin (GO:0009733);;	K14488|1.59861e-40|sot:102578891|K14488 SAUR family protein | (RefSeq) auxin-responsive protein SAUR32-like	Plant hormone signal transduction (ko04075)	--	--	Auxin responsive protein	Auxin-responsive protein SAUR32 OS=Arabidopsis thaliana OX=3702 GN=SAUR32 PE=2 SV=1	S	Function unknown	PREDICTED: auxin-responsive protein SAUR32-like [Nicotiana attenuata]	biological process: response to stimulus (GO:0050896)
	ARFs	Niben101Scf04907g01013	Niben101Scf04907g01013	4.29679	3.5394	4.09858	3.98977	5.36169	5.68971	14.8451	9.3781	8.66867	3.89059	3.74275	3.66181	2.39042e-06	1.08695	up	5.44375e-05	1.08732	up	0.999252	0.000322172	normal	0.927985	-0.0285875	normal	6.99765e-07	1.0986	up	--	--	Biological Process: transcription, DNA-templated (GO:0006351);; Biological Process: response to hormone (GO:0009725);; Biological Process: regulation of cellular process (GO:0050794);;	K14486|1.05838e-97|pper:PRUPE_ppa002394mg|K14486 auxin response factor | (RefSeq) hypothetical protein	Plant hormone signal transduction (ko04075)	--	--	B3 DNA binding domain;; Auxin response factor	Auxin response factor 1 OS=Arabidopsis thaliana OX=3702 GN=ARF1 PE=1 SV=2	K	Transcription	PREDICTED: auxin response factor 1-like [Nicotiana sylvestris]	biological process: metabolic process (GO:0008152);; biological process: cellular process (GO:0009987);; biological process: response to stimulus (GO:0050896);; biological process: biological regulation (GO:0065007)
	ARFs	Niben101Scf00152g20002	Niben101Scf00152g20002	0.560022	0.755877	0.424019	1.62593	3.47942	2.10132	0.438492	0.58363	1.25295	0.19229	0.489498	0.142295	0.892731	0.0967746	normal	0.00266589	-1.20808	down	0.272213	0.441885	normal	5.87788e-10	2.30657	up	0.0838391	0.770269	normal	--	--	Cellular Component: nucleus (GO:0005634);; Biological Process: regulation of transcription, DNA-templated (GO:0006355);; Biological Process: auxin-activated signaling pathway (GO:0009734);; Biological Process: flower development (GO:0009908);; Biological Process: longitudinal axis specification (GO:0009942);; Biological Process: leaf vascular tissue pattern formation (GO:0010305);; Cellular Compo…	K14486|0|spen:107018132|K14486 auxin response factor | (RefSeq) auxin response factor 5	Plant hormone signal transduction (ko04075)	--	--	Auxin response factor;; B3 DNA binding domain;; AUX/IAA family	Auxin response factor 5 OS=Arabidopsis thaliana OX=3702 GN=ARF5 PE=1 SV=3	K	Transcription	PREDICTED: auxin response factor 5 [Nicotiana attenuata]	cellular component: cell (GO:0005623);; cellular component: organelle (GO:0043226);; cellular component: cell part (GO:0044464);; biological process: biological regulation (GO:0065007);; biological process: cellular process (GO:0009987);; biological process: signaling (GO:0023052);; biological process: single-organism process (GO:0044699);; biological process: response to stimulus (GO:0050896);; …
	ARFs	Niben101Scf07465g02002	Niben101Scf07465g02002	0.894698	1.27016	0.963548	1.06582	4.79573	1.34382	0.717737	0.815833	1.18423	0.550828	0.882301	0.51486	0.356014	-0.368585	normal	0.0776286	-0.887079	normal	0.35251	0.386455	normal	0.0120614	1.16185	up	0.798241	0.130462	normal	--	--	Cellular Component: nucleus (GO:0005634);; Biological Process: regulation of transcription, DNA-templated (GO:0006355);; Biological Process: auxin-activated signaling pathway (GO:0009734);; Biological Process: flower development (GO:0009908);; Biological Process: longitudinal axis specification (GO:0009942);; Biological Process: leaf vascular tissue pattern formation (GO:0010305);; Cellular Compo…	K14486|0|spen:107018132|K14486 auxin response factor | (RefSeq) auxin response factor 5	Plant hormone signal transduction (ko04075)	--	--	B3 DNA binding domain;; Auxin response factor	Auxin response factor 5 OS=Arabidopsis thaliana OX=3702 GN=ARF5 PE=1 SV=3	K	Transcription	PREDICTED: auxin response factor 5-like [Nicotiana tabacum]	cellular component: cell (GO:0005623);; cellular component: organelle (GO:0043226);; cellular component: cell part (GO:0044464);; biological process: biological regulation (GO:0065007);; biological process: cellular process (GO:0009987);; biological process: signaling (GO:0023052);; biological process: single-organism process (GO:0044699);; biological process: response to stimulus (GO:0050896);; …
	AUX-15A	Niben101Scf06267g01005	Niben101Scf06267g01005	8.78689	8.68784	7.08133	11.9016	12.8493	7.70261	4.34523	4.02507	3.70368	7.97305	6.2734	6.23414	0.00033731	-1.04374	down	0.0014536	-1.1105	down	0.884263	0.113792	normal	0.654481	0.197215	normal	0.00393527	-0.919011	normal	--	--	Biological Process: response to auxin (GO:0009733);;	K14488|2.45978e-60|sot:102586210|K14488 SAUR family protein | (RefSeq) auxin-induced protein 15A-like	Plant hormone signal transduction (ko04075)	--	--	Auxin responsive protein	Auxin-responsive protein SAUR50 OS=Arabidopsis thaliana OX=3702 GN=SAUR50 PE=1 SV=1	S	Function unknown	PREDICTED: auxin-induced protein 15A [Nicotiana tomentosiformis]	biological process: response to stimulus (GO:0050896)
	AUX-15A	Niben101Scf07160g00025	Niben101Scf07160g00025	1.37932	1.25699	1.00371	2.25138	3.23062	2.07604	0.417239	1.03298	1.05234	1.21577	1.7327	1.97109	0.292408	-0.516072	normal	0.00933628	-1.11461	down	0.629753	-0.266647	normal	0.762222	0.149585	normal	0.0164291	-0.95446	normal	--	--	Biological Process: response to auxin (GO:0009733);;	K14488|3.30052e-47|sly:104645435|K14488 SAUR family protein | (RefSeq) auxin-induced protein 15A-like	Plant hormone signal transduction (ko04075)	--	--	Auxin responsive protein	Auxin-induced protein 15A OS=Glycine max OX=3847 PE=2 SV=1	S	Function unknown	PREDICTED: auxin-induced protein 15A-like [Nicotiana sylvestris]	biological process: response to stimulus (GO:0050896)
	AUX-22	Niben101Scf24330g00014	Niben101Scf24330g00014	3.74621	4.34839	1.91482	7.63522	9.12463	4.21098	1.89518	3.48667	2.9082	3.23646	2.91219	3.0248	0.378648	-0.398213	normal	0.00695606	-1.02799	down	0.983682	0.0241267	normal	0.0479136	0.68443	normal	0.230856	-0.425514	normal	--	--	Cellular Component: nucleus (GO:0005634);; Biological Process: regulation of transcription, DNA-templated (GO:0006355);; Biological Process: auxin-activated signaling pathway (GO:0009734);;	K14484|6.32796e-94|sot:102599665|K14484 auxin-responsive protein IAA | (RefSeq) auxin-induced protein IAA6-like	Plant hormone signal transduction (ko04075)	--	--	AUX/IAA family	Auxin-induced protein AUX22 OS=Glycine max OX=3847 GN=AUX22 PE=2 SV=1	K	Transcription	PREDICTED: auxin-induced protein AUX22-like [Nicotiana sylvestris]	cellular component: cell (GO:0005623);; cellular component: organelle (GO:0043226);; cellular component: cell part (GO:0044464);; biological process: biological regulation (GO:0065007);; biological process: cellular process (GO:0009987);; biological process: signaling (GO:0023052);; biological process: single-organism process (GO:0044699);; biological process: response to stimulus (GO:0050896)
	AUX-22	Niben101Scf05232g02012	Niben101Scf05232g02012	2.86474	3.89422	1.92452	5.81493	8.0505	4.19424	1.93402	1.72087	3.64641	1.62603	2.2056	1.02018	0.425532	-0.376433	normal	0.0108781	-0.99244	normal	0.291673	0.430133	normal	8.69816e-05	1.31574	up	0.709347	0.199231	normal	--	--	Cellular Component: nucleus (GO:0005634);; Biological Process: regulation of transcription, DNA-templated (GO:0006355);; Biological Process: auxin-activated signaling pathway (GO:0009734);;	K14484|6.58556e-63|sot:102599665|K14484 auxin-responsive protein IAA | (RefSeq) auxin-induced protein IAA6-like	Plant hormone signal transduction (ko04075)	--	--	AUX/IAA family	Auxin-induced protein 22A OS=Vigna radiata var. radiata OX=3916 GN=AUX22A PE=2 SV=1	K	Transcription	PREDICTED: auxin-induced protein AUX22-like [Nicotiana tomentosiformis]	cellular component: cell (GO:0005623);; cellular component: organelle (GO:0043226);; cellular component: cell part (GO:0044464);; biological process: biological regulation (GO:0065007);; biological process: cellular process (GO:0009987);; biological process: signaling (GO:0023052);; biological process: single-organism process (GO:0044699);; biological process: response to stimulus (GO:0050896)
	LAX	Niben101Scf33211g00002	Niben101Scf33211g00002	7.42998	11.2716	5.57729	16.4406	18.9811	17.0631	6.66591	9.78576	9.57036	4.73597	5.3406	5.65547	0.804309	-0.122839	normal	2.3604e-05	-0.883403	normal	0.217398	0.40952	normal	2.26846e-17	1.27496	up	0.142644	0.358173	normal	--	--	Biological Process: amino acid transmembrane transport (GO:0003333);; Cellular Component: plasma membrane (GO:0005886);; Molecular Function: amino acid transmembrane transporter activity (GO:0015171);; Cellular Component: integral component of membrane (GO:0016021);;	K13946|0|sot:102584729|K13946 auxin influx carrier (AUX1 LAX family) | (RefSeq) auxin transporter-like protein 3	Plant hormone signal transduction (ko04075)	[E]	Amino acid transport and metabolism	Transmembrane amino acid transporter protein	Auxin transporter-like protein 3 OS=Medicago truncatula OX=3880 GN=LAX3 PE=2 SV=1	E	Amino acid transport and metabolism	PREDICTED: auxin transporter-like protein 3 [Nicotiana tomentosiformis]	biological process: single-organism process (GO:0044699);; biological process: localization (GO:0051179);; cellular component: cell (GO:0005623);; cellular component: membrane (GO:0016020);; cellular component: cell part (GO:0044464);; molecular function: transporter activity (GO:0005215);; cellular component: membrane part (GO:0044425)
	GH3	Niben101Scf00253g03001	Niben101Scf00253g03001	0.292167	0.440334	0.0629	0.632292	5.54524	1.30793	0.307168	0.254152	0.684973	0.098034	0.133531	0.131749	--	--	--	0.00571866	-1.33795	down	--	--	--	4.2155e-08	2.68851	up	--	--	--	[HJ]	Coenzyme transport and metabolism;; Translation, ribosomal structure and biogenesis	--	K14487|0|sot:102580803|K14487 auxin responsive GH3 gene family | (RefSeq) indole-3-acetic acid-amido synthetase GH3.6-like	Plant hormone signal transduction (ko04075)	--	--	GH3 auxin-responsive promoter	Indole-3-acetic acid-amido synthetase GH3.6 OS=Arabidopsis thaliana OX=3702 GN=GH3.6 PE=1 SV=1	S	Function unknown	PREDICTED: indole-3-acetic acid-amido synthetase GH3.6 [Nicotiana attenuata]	--
	GH3	Niben101Scf00503g03007	Niben101Scf00503g03007	3.37816	5.53733	2.44401	2.73167	1.66043	2.4696	3.36987	3.39208	5.10809	4.53279	4.04286	5.36755	0.789211	-0.146905	normal	0.0417566	0.732243	normal	0.594443	-0.263798	normal	1.3116e-06	-1.34784	down	0.0531347	-0.526047	normal	[HJ]	Coenzyme transport and metabolism;; Translation, ribosomal structure and biogenesis	--	K14506|0|spen:107007864|K14506 jasmonic acid-amino synthetase | (RefSeq) jasmonic acid-amido synthetase JAR1-like	Plant hormone signal transduction (ko04075)	--	--	GH3 auxin-responsive promoter	Jasmonic acid-amido synthetase JAR1 OS=Oryza sativa subsp. japonica OX=39947 GN=GH3.5 PE=2 SV=1	S	Function unknown	PREDICTED: probable indole-3-acetic acid-amido synthetase GH3.5 [Nicotiana sylvestris]	--
ABA synthesis and transduction	PYL	Niben101Scf01897g07006	Niben101Scf01897g07006	4.79569	3.656	4.91822	1.43412	2.97318	1.30819	0.913322	1.74683	2.3211	3.17163	5.59997	5.98776	0.000101074	-1.27257	down	0.936084	-0.0758228	normal	0.844695	-0.141296	normal	1.91271e-05	-1.58472	down	5.24005e-06	-1.4978	down	--	--	Molecular Function: protein phosphatase inhibitor activity (GO:0004864);; Molecular Function: receptor activity (GO:0004872);; Cellular Component: nucleus (GO:0005634);; Cellular Component: cytoplasm (GO:0005737);; Biological Process: abscisic acid-activated signaling pathway (GO:0009738);; Molecular Function: abscisic acid binding (GO:0010427);; Biological Process: negative regulation of catalyt…	K14496|1.447e-125|spen:107032157|K14496 abscisic acid receptor PYR/PYL family | (RefSeq) abscisic acid receptor PYL4	Plant hormone signal transduction (ko04075)	--	--	Polyketide cyclase / dehydrase and lipid transport;; Pathogenesis-related protein Bet v I family;; Polyketide cyclase / dehydrase and lipid transport	Abscisic acid receptor PYL4 OS=Arabidopsis thaliana OX=3702 GN=PYL4 PE=1 SV=1	S	Function unknown	PREDICTED: abscisic acid receptor PYL4-like [Nicotiana sylvestris]	biological process: biological regulation (GO:0065007);; molecular function: molecular function regulator (GO:0098772);; molecular function: molecular transducer activity (GO:0060089);; cellular component: cell (GO:0005623);; cellular component: organelle (GO:0043226);; cellular component: cell part (GO:0044464);; biological process: cellular process (GO:0009987);; biological process: signaling (…
	PYL	Niben101Scf02085g21007	Niben101Scf02085g21007	2.69105	3.26018	3.79067	3.49679	3.57476	2.81392	1.04981	2.25449	1.67087	3.01655	4.17299	3.45194	0.012104	-0.90723	normal	0.107678	-0.722418	normal	0.857155	-0.13365	normal	0.134448	-0.493565	normal	0.000337545	-1.15975	down	--	--	Molecular Function: protein phosphatase inhibitor activity (GO:0004864);; Molecular Function: receptor activity (GO:0004872);; Cellular Component: nucleus (GO:0005634);; Cellular Component: cytoplasm (GO:0005737);; Biological Process: abscisic acid-activated signaling pathway (GO:0009738);; Molecular Function: abscisic acid binding (GO:0010427);; Biological Process: negative regulation of catalyt…	K14496|5.72938e-125|spen:107032157|K14496 abscisic acid receptor PYR/PYL family | (RefSeq) abscisic acid receptor PYL4	Plant hormone signal transduction (ko04075)	--	--	Polyketide cyclase / dehydrase and lipid transport;; Polyketide cyclase / dehydrase and lipid transport;; Pathogenesis-related protein Bet v I family	Abscisic acid receptor PYL4 OS=Arabidopsis thaliana OX=3702 GN=PYL4 PE=1 SV=1	S	Function unknown	PREDICTED: abscisic acid receptor PYL4-like [Nicotiana sylvestris]	biological process: biological regulation (GO:0065007);; molecular function: molecular function regulator (GO:0098772);; molecular function: molecular transducer activity (GO:0060089);; cellular component: cell (GO:0005623);; cellular component: organelle (GO:0043226);; cellular component: cell part (GO:0044464);; biological process: cellular process (GO:0009987);; biological process: signaling (…
	ABI5	Niben101Scf07778g03025	Niben101Scf07778g03025	2.52074	3.1607	3.82916	2.36482	2.02413	2.23756	2.27429	1.67864	1.70326	3.45405	3.76266	5.0512	0.00141079	-0.869285	normal	0.771961	-0.144335	normal	0.398653	-0.329786	normal	3.38589e-07	-1.2496	down	1.79307e-08	-1.3191	down	--	--	Molecular Function: transcription factor activity, sequence-specific DNA binding (GO:0003700);; Cellular Component: nucleus (GO:0005634);; Biological Process: response to cold (GO:0009409);; Biological Process: response to water deprivation (GO:0009414);; Biological Process: response to salt stress (GO:0009651);; Biological Process: response to abscisic acid (GO:0009737);; Biological Process: pol…	K14432|0|sly:104649075|K14432 ABA responsive element binding factor | (RefSeq) protein ABSCISIC ACID-INSENSITIVE 5	Plant hormone signal transduction (ko04075)	--	--	bZIP transcription factor;; Basic region leucine zipper	Protein ABSCISIC ACID-INSENSITIVE 5 OS=Arabidopsis thaliana OX=3702 GN=ABI5 PE=1 SV=1	K	Transcription	PREDICTED: protein ABSCISIC ACID-INSENSITIVE 5 isoform X1 [Nicotiana attenuata]	biological process: biological regulation (GO:0065007);; molecular function: nucleic acid binding transcription factor activity (GO:0001071);; cellular component: cell (GO:0005623);; cellular component: organelle (GO:0043226);; cellular component: cell part (GO:0044464);; biological process: response to stimulus (GO:0050896);; biological process: developmental process (GO:0032502);; biological pr…
	PP2C	Niben101Scf00530g10010	Niben101Scf00530g10010	1.69122	0.132222	0.057283	0.564401	1.26994	3.64153	0.390162	0.473474	0.448926	0.593718	0.350414	0.059252	0.800297	-0.151908	normal	0.0131916	-1.19993	down	--	--	--	0.160974	0.911241	normal	0.979903	0.0217808	normal	[T]	Signal transduction mechanisms	Molecular Function: protein serine/threonine phosphatase activity (GO:0004722);; Biological Process: protein dephosphorylation (GO:0006470);; Molecular Function: metal ion binding (GO:0046872);;	K14497|9.68306e-178|sot:102582408|K14497 protein phosphatase 2C [EC:3.1.3.16] | (RefSeq) probable protein phosphatase 2C 51	Plant hormone signal transduction (ko04075)	[T]	Signal transduction mechanisms	Protein phosphatase 2C	Probable protein phosphatase 2C 8 OS=Oryza sativa subsp. japonica OX=39947 GN=Os01g0656200 PE=2 SV=1	T	Signal transduction mechanisms	PREDICTED: probable protein phosphatase 2C 51 [Nicotiana attenuata]	biological process: metabolic process (GO:0008152);; biological process: cellular process (GO:0009987);; molecular function: catalytic activity (GO:0003824);; molecular function: binding (GO:0005488)
Ethylene synthesis and transduction	ERFs	Niben101Scf15451g00001	Niben101Scf15451g00001	0.579224	0.357301	0.222628	2.8311	3.82104	2.46054	0.65746	0.704134	1.01391	0.045218	0.099829	0.171819	--	--	--	0.000167652	-1.41381	down	--	--	--	8.04236e-12	3.06207	up	--	--	--	--	--	Molecular Function: DNA binding (GO:0003677);; Molecular Function: transcription factor activity, sequence-specific DNA binding (GO:0003700);; Cellular Component: nucleus (GO:0005634);; Biological Process: regulation of transcription, DNA-templated (GO:0006355);;	K14516|7.90169e-84|spen:107017200|K14516 ethylene-responsive transcription factor 1 | (RefSeq) ethylene-responsive transcription factor 1B-like	Plant hormone signal transduction (ko04075)	--	--	AP2 domain	Ethylene-responsive transcription factor 1B OS=Arabidopsis thaliana OX=3702 GN=ERF1B PE=1 SV=2	--	--	PREDICTED: ethylene-responsive transcription factor 1B-like [Nicotiana attenuata]	molecular function: binding (GO:0005488);; biological process: biological regulation (GO:0065007);; molecular function: nucleic acid binding transcription factor activity (GO:0001071);; cellular component: cell (GO:0005623);; cellular component: organelle (GO:0043226);; cellular component: cell part (GO:0044464)
	ERFs	Niben101Scf07761g02006	Niben101Scf07761g02006	9.56981	4.0211	13.4271	1.48111	1.12153	1.18901	10.1487	3.45398	5.88026	7.76651	20.5428	6.66605	0.293126	-0.504334	normal	8.87408e-07	1.8187	up	0.891519	-0.0977538	normal	4.29225e-18	-3.10508	down	0.202356	-0.64528	normal	--	--	Molecular Function: DNA binding (GO:0003677);; Molecular Function: transcription factor activity, sequence-specific DNA binding (GO:0003700);; Cellular Component: nucleus (GO:0005634);; Biological Process: regulation of transcription, DNA-templated (GO:0006355);; Biological Process: regulation of ethylene-activated signaling pathway (GO:0010104);;	K14516|8.10983e-81|sot:102592933|K14516 ethylene-responsive transcription factor 1 | (RefSeq) ethylene-responsive transcription factor 1B-like	Plant hormone signal transduction (ko04075)	--	--	AP2 domain	Ethylene-responsive transcription factor 1B OS=Arabidopsis thaliana OX=3702 GN=ERF1B PE=1 SV=2	K	Transcription	PREDICTED: ethylene-responsive transcription factor 1B-like [Nicotiana attenuata]	molecular function: binding (GO:0005488);; biological process: biological regulation (GO:0065007);; molecular function: nucleic acid binding transcription factor activity (GO:0001071);; cellular component: cell (GO:0005623);; cellular component: organelle (GO:0043226);; cellular component: cell part (GO:0044464)
	ERFs	Niben101Scf01752g05003	Niben101Scf01752g05003	28.3109	20.2193	34.1737	23.0092	34.3011	23.7522	114.586	68.0284	68.9018	17.7336	29.0324	20.3442	4.27796e-06	1.17289	up	2.32486e-09	1.5332	up	0.72419	0.184939	normal	0.618939	-0.149648	normal	1.34278e-10	1.43713	up	--	--	Molecular Function: DNA binding (GO:0003677);; Molecular Function: transcription factor activity, sequence-specific DNA binding (GO:0003700);; Cellular Component: nucleus (GO:0005634);; Biological Process: regulation of transcription, DNA-templated (GO:0006355);; Biological Process: defense response (GO:0006952);; Biological Process: ethylene-activated signaling pathway (GO:0009873);; Cellular Co…	K09286|1.45635e-76|sot:102597562|K09286 EREBP-like factor | (RefSeq) ERF4; ethylene-responsive transcription factor 3-like	--	--	--	AP2 domain	Ethylene-responsive transcription factor 3 OS=Nicotiana tabacum OX=4097 GN=ERF3 PE=2 SV=1	K	Transcription	molecular function: binding (GO:0005488);; biological process: biological regulation (GO:0065007);; molecular function: nucleic acid binding transcription factor activity (GO:0001071);; cellular component: cell (GO:0005623);; cellular component: organelle (GO:0043226);; cellular component: cell part (GO:0044464);; biological process: response to stimulus (GO:0050896);; biological process: cellula…
	EIN3	Niben101Scf02688g00009	Niben101Scf02688g00009	1.44849	0.860675	1.35939	0.514236	1.03213	0.982419	1.31509	0.84602	0.701762	1.217	1.18668	2.17129	0.234758	-0.483797	normal	0.744865	0.210755	normal	0.656231	-0.247471	normal	0.00114021	-1.1714	down	0.0148647	-0.841846	normal	--	--	Molecular Function: transcription factor activity, sequence-specific DNA binding (GO:0003700);; Cellular Component: nucleus (GO:0005634);; Biological Process: regulation of transcription, DNA-templated (GO:0006355);;	K14514|0|sot:102590311|K14514 ethylene-insensitive protein 3 | (RefSeq) ETHYLENE INSENSITIVE 3-like 3 protein	Plant hormone signal transduction (ko04075)	--	--	Ethylene insensitive 3	ETHYLENE INSENSITIVE 3-like 3 protein OS=Arabidopsis thaliana OX=3702 GN=EIL3 PE=1 SV=1	K	Transcription	PREDICTED: ETHYLENE INSENSITIVE 3-like 3 protein [Nicotiana tabacum]	biological process: biological regulation (GO:0065007);; molecular function: nucleic acid binding transcription factor activity (GO:0001071);; cellular component: cell (GO:0005623);; cellular component: organelle (GO:0043226);; cellular component: cell part (GO:0044464)
	EBF1	Niben101Scf14688g00005	Niben101Scf14688g00005	18.958	19.3474	19.6303	11.5169	11.3293	16.0961	17.9232	17.7561	17.7312	17.8652	22.0542	20.7186	0.00881358	-0.355271	normal	0.0323784	0.49976	normal	0.668555	-0.130026	normal	1.39732e-08	-1.0371	down	3.76537e-05	-0.508514	normal	[K]	Transcription	Biological Process: response to ethylene (GO:0009723);; Biological Process: response to auxin (GO:0009733);;	K14515|0|sot:102605047|K14515 EIN3-binding F-box protein | (RefSeq) EIN3-binding F-box protein 1-like	Plant hormone signal transduction (ko04075)	[R]	General function prediction only	Leucine Rich repeat;; Leucine Rich repeats (2 copies);; F-box domain;; F-box-like	EIN3-binding F-box protein 1 OS=Arabidopsis thaliana OX=3702 GN=EBF1 PE=1 SV=1	S	Function unknown	PREDICTED: EIN3-binding F-box protein 1-like [Nicotiana attenuata]	biological process: response to stimulus (GO:0050896)
GA synthesis and transduction	DELLA	Niben101Scf03240g00008	Niben101Scf03240g00008	0.56187	0.516955	0.811072	0.478978	0.512924	0.449417	1.94396	0.753807	1.37902	0.315154	0.759272	0.458174	0.14887	0.619575	normal	0.00326393	1.19505	up	0.906298	0.100686	normal	0.378614	-0.439838	normal	0.0478924	0.799228	normal	--	--	Molecular Function: transcription factor activity, sequence-specific DNA binding (GO:0003700);; Cellular Component: nucleus (GO:0005634);; Biological Process: regulation of transcription, DNA-templated (GO:0006355);; Biological Process: response to ethylene (GO:0009723);; Biological Process: response to abscisic acid (GO:0009737);; Biological Process: salicylic acid mediated signaling pathway (GO…	K14494|3.87274e-133|nnu:104609975|K14494 DELLA protein | (RefSeq) DELLA protein GAI1-like	Plant hormone signal transduction (ko04075)	--	--	GRAS domain family	DELLA protein GAI OS=Solanum lycopersicum OX=4081 GN=GAI PE=2 SV=1	K	Transcription	PREDICTED: DELLA protein GAI-like [Nicotiana attenuata]	biological process: biological regulation (GO:0065007);; molecular function: nucleic acid binding transcription factor activity (GO:0001071);; cellular component: cell (GO:0005623);; cellular component: organelle (GO:0043226);; cellular component: cell part (GO:0044464);; biological process: response to stimulus (GO:0050896);; biological process: cellular process (GO:0009987);; biological process…
	DELLA	Niben101Scf02111g17003	Niben101Scf02111g17003	5.7476	5.91013	6.94855	3.89832	3.64103	3.1651	5.54701	5.25576	5.35212	6.0625	5.73059	5.91173	0.0598025	-0.424104	normal	0.0110216	0.619914	normal	0.996033	-0.00477304	normal	8.81441e-08	-1.11405	down	0.0219579	-0.451962	normal	--	--	--	K14494|0|sot:102597745|K14494 DELLA protein | (RefSeq) DELLA protein RGL1-like	Plant hormone signal transduction (ko04075)	--	--	GRAS domain family	DELLA protein RGL1 OS=Arabidopsis thaliana OX=3702 GN=RGL1 PE=1 SV=1	--	--	PREDICTED: DELLA protein RGL1-like [Nicotiana attenuata]	--
	GID1B	Niben101Scf05614g00001	Niben101Scf05614g00001	0.497711	0.467234	0.440764	1.05346	1.11078	1.3013	1.62479	1.24418	1.25259	0.338522	0.385314	0.386785	0.00245523	1.01413	up	0.587148	0.271932	normal	--	--	--	0.00669756	1.04595	up	0.000253541	1.21971	up	[I]	Lipid transport and metabolism	Biological Process: metabolic process (GO:0008152);; Molecular Function: hydrolase activity (GO:0016787);;	K14493|0|sot:102579350|K14493 gibberellin receptor GID1 [EC:3.-.-.-] | (RefSeq) gibberellin receptor GID1B-like	Plant hormone signal transduction (ko04075)	[V]	Defense mechanisms	alpha/beta hydrolase fold;; Carboxylesterase family	Gibberellin receptor GID1B OS=Arabidopsis thaliana OX=3702 GN=GID1B PE=1 SV=1	I	Lipid transport and metabolism	PREDICTED: gibberellin receptor GID1B-like [Nicotiana sylvestris]	biological process: metabolic process (GO:0008152);; molecular function: catalytic activity (GO:0003824)
JA synthesis and transduction	COI1	Niben101Scf02280g08005	Niben101Scf02280g08005	13.7087	12.8323	14.8525	9.82629	11.623	8.5633	14.5213	11.7587	12.3167	14.9042	15.3324	15.8876	0.100931	-0.332589	normal	0.0937363	0.414371	normal	0.443825	-0.211074	normal	7.63208e-10	-1.03129	down	0.000237258	-0.577618	normal	--	--	--	K13463|0|spen:107020531|K13463 coronatine-insensitive protein 1 | (RefSeq) coronatine-insensitive protein 1	Plant hormone signal transduction (ko04075)	[R]	General function prediction only	--	Coronatine-insensitive protein 1 OS=Arabidopsis thaliana OX=3702 GN=COI1 PE=1 SV=1	S	Function unknown	PREDICTED: coronatine-insensitive protein 1-like [Nicotiana attenuata]	--
note: P+H, PBS solution + H2O; P+B, PBS solution + boron; C+H, CGMMV + H2O; C+B, CGMMV + boron.

## Sheet: CAM 
Supplementary Table 10. DEGs of various biological functional classifications.
Ca2+ signal transduction	Gene abbreviation	Gene ID	Gene_name	P+B-1	P+B-2	P+B-3	C+H-1	C+H-2	C+H-3	C+B-1	C+B-2	C+B-3	P+H-1	P+H-2	P+H-3	P+B-1_P+B-2_P+B-3_vs._C+B-1_C+B-2_C+B-3_DESeq2_FDR	P+B-1_P+B-2_P+B-3_vs._C+B-1_C+B-2_C+B-3_DESeq2_log2FC	P+B-1_P+B-2_P+B-3_vs._C+B-1_C+B-2_C+B-3_DESeq2_(FDR_0.05_FC_2)_regulated	C+H-1_C+H-2_C+H-3_vs._C+B-1_C+B-2_C+B-3_DESeq2_FDR	C+H-1_C+H-2_C+H-3_vs._C+B-1_C+B-2_C+B-3_DESeq2_log2FC	C+H-1_C+H-2_C+H-3_vs._C+B-1_C+B-2_C+B-3_DESeq2_(FDR_0.05_FC_2)_regulated	P+H-1_P+H-2_P+H-3_vs._P+B-1_P+B-2_P+B-3_DESeq2_FDR	P+H-1_P+H-2_P+H-3_vs._P+B-1_P+B-2_P+B-3_DESeq2_log2FC	P+H-1_P+H-2_P+H-3_vs._P+B-1_P+B-2_P+B-3_DESeq2_(FDR_0.05_FC_2)_regulated	P+H-1_P+H-2_P+H-3_vs._C+H-1_C+H-2_C+H-3_DESeq2_FDR	P+H-1_P+H-2_P+H-3_vs._C+H-1_C+H-2_C+H-3_DESeq2_log2FC	P+H-1_P+H-2_P+H-3_vs._C+H-1_C+H-2_C+H-3_DESeq2_(FDR_0.05_FC_2)_regulated	P+H-1_P+H-2_P+H-3_vs._C+B-1_C+B-2_C+B-3_DESeq2_FDR	P+H-1_P+H-2_P+H-3_vs._C+B-1_C+B-2_C+B-3_DESeq2_log2FC	P+H-1_P+H-2_P+H-3_vs._C+B-1_C+B-2_C+B-3_DESeq2_(FDR_0.05_FC_2)_regulated	COG_class	COG_class_annotation	GO_annotation	KEGG_annotation	KEGG_pathway_annotation	KOG_class	KOG_class_annotation	Pfam_annotation	Swiss_Prot_annotation	eggNOG_class	eggNOG_class_annotation	NR_annotation	GO_second_level_annotation
	CBL	Niben101Scf02360g01011	Niben101Scf02360g01011	2.45752	1.78715	1.36199	1.16552	1.68394	1.76788	2.52194	4.45013	2.02222	1.01333	0.859524	1.05523	0.459139	0.346156	normal	0.0374451	0.843957	normal	0.145622	0.515449	normal	0.654891	0.196018	normal	0.00172224	1.03767	up	--	--	Molecular Function: calcium ion binding (GO:0005509);;	K06268|1.85429e-129|sot:102604629|K06268 serine/threonine-protein phosphatase 2B regulatory subunit | (RefSeq) calcineurin B-like protein 7	--	[T]	Signal transduction mechanisms	EF hand;; EF-hand domain;; EF hand;; EF-hand domain pair;; EF-hand domain pair	Calcineurin B-like protein 7 OS=Oryza sativa subsp. japonica OX=39947 GN=CBL7 PE=2 SV=1	DTZ	Cell cycle control, cell division, chromosome partitioning;; Signal transduction mechanisms;; Cytoskeleton	PREDICTED: calcineurin B-like protein 7 isoform X1 [Nicotiana tabacum]	molecular function: binding (GO:0005488)
	CAM/CML	Niben101Scf07451g00013	Niben101Scf07451g00013	11.3674	9.49015	18.7401	12.5212	15.7132	11.0628	45.701	34.3839	39.5574	7.23089	8.58515	5.7126	1.33929e-05	1.14754	up	1.86241e-14	1.567	up	0.0992107	0.538522	normal	0.14891	0.411636	normal	4.19143e-26	1.99281	up	[T]	Signal transduction mechanisms	Molecular Function: calcium ion binding (GO:0005509);;	K13448|5.14449e-89|sot:102599328|K13448 calcium-binding protein CML | (RefSeq) calcium-binding allergen Ole e 8	Plant-pathogen interaction (ko04626)	[T]	Signal transduction mechanisms	EF-hand domain pair;; EF hand;; EF-hand domain pair;; EF-hand domain;; EF hand;; Secreted protein acidic and rich in cysteine Ca binding region;; Cytoskeletal-regulatory complex EF hand	Calcium-binding allergen Ole e 8 OS=Olea europaea OX=4146 PE=1 SV=1	DTZ	Cell cycle control, cell division, chromosome partitioning;; Signal transduction mechanisms;; Cytoskeleton	PREDICTED: calcium-binding allergen Ole e 8-like [Nicotiana tabacum]	molecular function: binding (GO:0005488)
		Niben101Scf08653g05009	Niben101Scf08653g05009	8.71717	7.27127	7.75652	8.08971	10.3102	12.5594	16.6851	12.7298	12.2107	4.52339	5.61359	4.99066	0.0529558	0.5066	normal	0.180984	0.454742	normal	0.187075	0.427938	normal	0.0406291	0.560451	normal	5.56206e-06	1.01947	up	[T]	Signal transduction mechanisms	Molecular Function: calcium ion binding (GO:0005509);;	K13448|3.68896e-87|sot:102599328|K13448 calcium-binding protein CML | (RefSeq) calcium-binding allergen Ole e 8	Plant-pathogen interaction (ko04626)	[T]	Signal transduction mechanisms	EF hand;; EF-hand domain pair;; EF-hand domain pair;; EF-hand domain;; EF hand;; Secreted protein acidic and rich in cysteine Ca binding region;; Cytoskeletal-regulatory complex EF hand	Calcium-binding allergen Ole e 8 OS=Olea europaea OX=4146 PE=1 SV=1	DTZ	Cell cycle control, cell division, chromosome partitioning;; Signal transduction mechanisms;; Cytoskeleton	PREDICTED: calcium-binding allergen Ole e 8-like [Nicotiana tabacum]	molecular function: binding (GO:0005488)
		Niben101Scf16651g00003	Niben101Scf16651g00003	13.1824	11.2759	9.96574	14.6925	14.1994	13.4018	29.0717	26.8201	21.111	9.32606	6.4568	10.7779	0.000109022	0.837635	normal	0.000194972	0.869156	normal	0.72435	0.199988	normal	0.568471	0.210229	normal	3.341e-05	1.05321	up	[T]	Signal transduction mechanisms	Molecular Function: calcium ion binding (GO:0005509);;	K13448|4.33447e-94|sot:102587258|K13448 calcium-binding protein CML | (RefSeq) calcium-binding allergen Ole e 8-like	Plant-pathogen interaction (ko04626)	[T]	Signal transduction mechanisms	EF hand;; EF-hand domain pair;; EF-hand domain;; EF-hand domain pair;; EF hand;; Secreted protein acidic and rich in cysteine Ca binding region;; Cytoskeletal-regulatory complex EF hand	Calcium-binding allergen Ole e 8 OS=Olea europaea OX=4146 PE=1 SV=1	DTZ	Cell cycle control, cell division, chromosome partitioning;; Signal transduction mechanisms;; Cytoskeleton	PREDICTED: calcium-binding allergen Ole e 8-like [Nicotiana tomentosiformis]	molecular function: binding (GO:0005488)
		Niben101Scf07586g00004	Niben101Scf07586g00004	5.52379	6.16457	13.7169	7.4912	12.1439	7.74332	25.6674	17.0057	15.5463	7.52481	11.0818	7.98183	0.0544541	0.719259	normal	0.000796186	1.02488	up	0.938502	-0.0704338	normal	0.222556	-0.368649	normal	0.00476659	0.723354	normal	[T]	Signal transduction mechanisms	Molecular Function: calcium ion binding (GO:0005509);;	K13448|6.06155e-90|spen:107032124|K13448 calcium-binding protein CML | (RefSeq) calcium-binding protein CAST	Plant-pathogen interaction (ko04626)	[T]	Signal transduction mechanisms	EF hand;; EF-hand domain;; EF-hand domain pair;; EF hand;; EF-hand domain pair	Calcium-binding protein CAST OS=Solanum tuberosum OX=4113 PE=2 SV=1	DTZ	Cell cycle control, cell division, chromosome partitioning;; Signal transduction mechanisms;; Cytoskeleton	PREDICTED: calcium-binding protein CAST-like [Nicotiana sylvestris]	molecular function: binding (GO:0005488)
		Niben101Scf00069g15020	Niben101Scf00069g15020	13.684	11.3606	12.2638	12.2582	14.7368	11.5145	38.1014	34.9721	34.4331	11.2497	10.2227	9.85338	2.28145e-13	1.205	up	3.05389e-17	1.47654	up	0.809429	0.137843	normal	0.657995	-0.135567	normal	1.26741e-15	1.36072	up	[T]	Signal transduction mechanisms	Molecular Function: calcium ion binding (GO:0005509);;	K13448|5.09208e-93|spen:107011246|K13448 calcium-binding protein CML | (RefSeq) calcium-binding protein CML24-like	Plant-pathogen interaction (ko04626)	[T]	Signal transduction mechanisms	EF hand;; EF-hand domain pair;; EF-hand domain;; EF hand;; EF-hand domain pair;; EF-hand domain;; Cytoskeletal-regulatory complex EF hand;; Secreted protein acidic and rich in cysteine Ca binding region	Probable calcium-binding protein CML23 OS=Arabidopsis thaliana OX=3702 GN=CML23 PE=2 SV=1	DTZ	Cell cycle control, cell division, chromosome partitioning;; Signal transduction mechanisms;; Cytoskeleton	PREDICTED: calcium-binding protein CML24-like [Nicotiana attenuata]	molecular function: binding (GO:0005488)
		Niben101Scf00578g05003	Niben101Scf00578g05003	1.27077	1.33381	3.91484	1.72757	3.43147	0.513709	14.9543	7.66408	11.9557	1.02449	3.0025	1.00534	0.000109589	1.40473	up	3.106e-05	1.74705	up	--	--	--	--	--	--	9.63072e-08	1.82271	up	--	--	Molecular Function: calcium ion binding (GO:0005509);;	--	--	[ZD]	Cytoskeleton;; Cell cycle control, cell division, chromosome partitioning	EF-hand domain pair	Calcium-binding protein KRP1 OS=Arabidopsis thaliana OX=3702 GN=KRP1 PE=2 SV=1	DTZ	Cell cycle control, cell division, chromosome partitioning;; Signal transduction mechanisms;; Cytoskeleton	PREDICTED: calcium-binding protein PBP1-like [Nicotiana attenuata]	molecular function: binding (GO:0005488)
		Niben101Scf05862g00004	Niben101Scf05862g00004	5.54495	3.91399	5.87414	4.69755	6.88978	3.41975	17.9845	10.2874	13.0722	2.42006	4.07129	2.79569	0.00227757	0.958422	normal	0.000443558	1.2508	up	0.486263	0.333428	normal	0.69154	0.215473	normal	3.32483e-07	1.50441	up	--	--	Molecular Function: calcium ion binding (GO:0005509);;	--	--	[ZD]	Cytoskeleton;; Cell cycle control, cell division, chromosome partitioning	EF-hand domain pair	Calcium-binding protein PBP1 OS=Arabidopsis thaliana OX=3702 GN=PBP1 PE=1 SV=1	DTZ	Cell cycle control, cell division, chromosome partitioning;; Signal transduction mechanisms;; Cytoskeleton	PREDICTED: calcium-binding protein PBP1-like [Nicotiana attenuata]	molecular function: binding (GO:0005488)
		Niben101Scf05862g00005	Niben101Scf05862g00005	20.6951	19.6422	29.7503	20.6223	28.144	17.6173	72.5659	48.7178	60.9536	11.1577	20.0896	13.9542	3.01561e-05	0.997993	normal	6.66426e-09	1.3962	up	0.240369	0.41432	normal	0.75481	0.119809	normal	4.61001e-13	1.54252	up	--	--	Molecular Function: calcium ion binding (GO:0005509);;	--	--	[ZD]	Cytoskeleton;; Cell cycle control, cell division, chromosome partitioning	EF-hand domain pair	Calcium-binding protein KRP1 OS=Arabidopsis thaliana OX=3702 GN=KRP1 PE=2 SV=1	DTZ	Cell cycle control, cell division, chromosome partitioning;; Signal transduction mechanisms;; Cytoskeleton	PREDICTED: calcium-binding protein PBP1-like [Nicotiana attenuata]	molecular function: binding (GO:0005488)
		Niben101Scf05862g00006	Niben101Scf05862g00006	3.08413	1.66418	5.94414	1.83871	5.25226	2.27166	18.5332	8.52801	14.4163	0.452782	2.42523	1.49934	0.00211572	1.1527	up	1.35994e-05	1.66209	up	--	--	--	--	--	--	4.07217e-10	2.13098	up	--	--	Molecular Function: calcium ion binding (GO:0005509);;	--	--	[ZD]	Cytoskeleton;; Cell cycle control, cell division, chromosome partitioning	EF-hand domain pair	Calcium-binding protein KRP1 OS=Arabidopsis thaliana OX=3702 GN=KRP1 PE=2 SV=1	DTZ	Cell cycle control, cell division, chromosome partitioning;; Signal transduction mechanisms;; Cytoskeleton	PREDICTED: calcium-binding protein PBP1-like [Nicotiana attenuata]	molecular function: binding (GO:0005488)
		Niben101Scf00578g05007	Niben101Scf00578g05007	41.9419	36.8936	56.9353	40.4859	46.3021	39.3003	121.836	86.0674	102.642	25.7696	40.8297	23.1409	0.000250638	0.847384	normal	4.78757e-12	1.29686	up	0.221634	0.407027	normal	0.839827	0.0690621	normal	4.07812e-11	1.35494	up	--	--	Molecular Function: calcium ion binding (GO:0005509);;	--	--	[ZD]	Cytoskeleton;; Cell cycle control, cell division, chromosome partitioning	EF-hand domain pair	Calcium-binding protein KRP1 OS=Arabidopsis thaliana OX=3702 GN=KRP1 PE=2 SV=1	DTZ	Cell cycle control, cell division, chromosome partitioning;; Signal transduction mechanisms;; Cytoskeleton	PREDICTED: calcium-binding protein PBP1-like [Nicotiana sylvestris]	molecular function: binding (GO:0005488)
		Niben101Scf01685g09002	Niben101Scf01685g09002	13.3741	9.51827	33.1826	9.18016	16.2685	6.79383	84.2832	50.688	56.9947	7.91019	20.5788	10.9841	0.0786708	0.802248	normal	4.30752e-14	2.23047	up	0.861476	0.117899	normal	0.137676	-0.626452	normal	2.44988e-10	1.69697	up	--	--	Molecular Function: calcium ion binding (GO:0005509);;	K16465|2.70733e-54|sot:102601995|K16465 centrin-1 | (RefSeq) calcium-binding protein PBP1-like	--	[ZD]	Cytoskeleton;; Cell cycle control, cell division, chromosome partitioning	EF-hand domain pair	Calcium-binding protein KRP1 OS=Arabidopsis thaliana OX=3702 GN=KRP1 PE=2 SV=1	DTZ	Cell cycle control, cell division, chromosome partitioning;; Signal transduction mechanisms;; Cytoskeleton	PREDICTED: calcium-binding protein PBP1-like [Nicotiana sylvestris]	molecular function: binding (GO:0005488)
		Niben101Scf05522g00002	Niben101Scf05522g00002	14.2391	6.01773	23.9785	7.67944	15.1579	5.36848	55.4683	35.2455	46.0273	4.15115	18.5937	8.01456	0.107702	0.747383	normal	1.61845e-09	1.93395	up	0.882226	0.0963413	normal	0.430227	-0.43632	normal	0.0107787	1.10899	up	--	--	Molecular Function: calcium ion binding (GO:0005509);;	K16465|2.06311e-54|sot:102601995|K16465 centrin-1 | (RefSeq) calcium-binding protein PBP1-like	--	[ZD]	Cytoskeleton;; Cell cycle control, cell division, chromosome partitioning	EF-hand domain pair	Calcium-binding protein KRP1 OS=Arabidopsis thaliana OX=3702 GN=KRP1 PE=2 SV=1	DTZ	Cell cycle control, cell division, chromosome partitioning;; Signal transduction mechanisms;; Cytoskeleton	PREDICTED: calcium-binding protein PBP1-like [Nicotiana sylvestris]	molecular function: binding (GO:0005488)
		Niben101Scf02245g00008	Niben101Scf02245g00008	13.8454	11.6289	13.9838	12.8966	13.224	13.2782	27.1543	28.7362	18.114	9.21542	6.83414	7.60668	0.0285281	0.589222	normal	0.000792454	0.891886	normal	0.0967147	0.493554	normal	0.342982	0.284932	normal	2.69794e-06	1.16146	up	[T]	Signal transduction mechanisms	Molecular Function: calcium ion binding (GO:0005509);;	K13448|2.15678e-72|spen:107011246|K13448 calcium-binding protein CML | (RefSeq) calcium-binding protein CML24-like	Plant-pathogen interaction (ko04626)	[T]	Signal transduction mechanisms	EF hand;; EF-hand domain pair;; EF-hand domain;; EF hand;; EF-hand domain pair;; EF-hand domain;; Secreted protein acidic and rich in cysteine Ca binding region;; Cytoskeletal-regulatory complex EF hand	Probable calcium-binding protein CML23 OS=Arabidopsis thaliana OX=3702 GN=CML23 PE=2 SV=1	DTZ	Cell cycle control, cell division, chromosome partitioning;; Signal transduction mechanisms;; Cytoskeleton	PREDICTED: probable calcium-binding protein CML18 [Nicotiana attenuata]	molecular function: binding (GO:0005488)
		Niben101Scf08035g00009	Niben101Scf08035g00009	16.3694	14.0315	16.2974	11.1562	20.5661	10.8057	63.5978	44.0042	44.1133	10.6991	10.6532	13.3169	3.56056e-11	1.32726	up	8.73359e-10	1.68123	up	0.461823	0.27851	normal	0.716058	-0.148705	normal	1.09493e-15	1.64562	up	[T]	Signal transduction mechanisms	Molecular Function: calcium ion binding (GO:0005509);;	K13448|3.08003e-95|spen:107011246|K13448 calcium-binding protein CML | (RefSeq) calcium-binding protein CML24-like	Plant-pathogen interaction (ko04626)	[T]	Signal transduction mechanisms	EF hand;; EF-hand domain pair;; EF-hand domain;; EF hand;; EF-hand domain pair;; EF-hand domain;; Secreted protein acidic and rich in cysteine Ca binding region;; Cytoskeletal-regulatory complex EF hand	Probable calcium-binding protein CML18 OS=Oryza sativa subsp. japonica OX=39947 GN=CML18 PE=2 SV=1	DTZ	Cell cycle control, cell division, chromosome partitioning;; Signal transduction mechanisms;; Cytoskeleton	PREDICTED: probable calcium-binding protein CML18 [Nicotiana tomentosiformis]	molecular function: binding (GO:0005488)
		Niben101Scf03733g05002	Niben101Scf03733g05002	24.3288	23.2084	23.688	15.2181	14.6529	17.0781	26.3468	21.2445	18.278	27.2256	23.7836	28.8465	0.135467	-0.337535	normal	0.0364745	0.526068	normal	0.453944	-0.221233	normal	8.11336e-11	-1.17035	down	0.00476768	-0.58737	normal	--	--	Molecular Function: calcium ion binding (GO:0005509);; Cellular Component: cytoplasm (GO:0005737);;	K13448|4.87413e-142|sot:102579227|K13448 calcium-binding protein CML | (RefSeq) probable calcium-binding protein CML21	Plant-pathogen interaction (ko04626)	[T]	Signal transduction mechanisms	EF hand;; EF-hand domain pair;; EF-hand domain;; EF-hand domain pair;; EF hand;; Secreted protein acidic and rich in cysteine Ca binding region	Probable calcium-binding protein CML21 OS=Arabidopsis thaliana OX=3702 GN=CML21 PE=2 SV=1	DTZ	Cell cycle control, cell division, chromosome partitioning;; Signal transduction mechanisms;; Cytoskeleton	PREDICTED: probable calcium-binding protein CML21 [Nicotiana sylvestris]	molecular function: binding (GO:0005488);; cellular component: cell (GO:0005623);; cellular component: cell part (GO:0044464)
		Niben101Scf02195g01001	Niben101Scf02195g01001	5.25082	5.04858	10.486	10.209	13.4153	11.4097	36.9547	17.05	24.6314	4.50119	8.12952	7.43035	1.71932e-05	1.31636	up	0.000229421	1.09434	up	0.997478	-0.00257353	normal	0.191487	0.357066	normal	3.99134e-08	1.43535	up	[T]	Signal transduction mechanisms	Molecular Function: calcium ion binding (GO:0005509);;	K13448|1.28038e-94|sot:102601367|K13448 calcium-binding protein CML | (RefSeq) probable calcium-binding protein CML41	Plant-pathogen interaction (ko04626)	[T]	Signal transduction mechanisms	EF hand;; EF-hand domain pair;; EF-hand domain;; EF-hand domain pair;; EF hand	Probable calcium-binding protein CML41 OS=Arabidopsis thaliana OX=3702 GN=CML41 PE=2 SV=2	DTZ	Cell cycle control, cell division, chromosome partitioning;; Signal transduction mechanisms;; Cytoskeleton	PREDICTED: probable calcium-binding protein CML41 [Nicotiana sylvestris]	molecular function: binding (GO:0005488)
		Niben101Scf05029g02016	Niben101Scf05029g02016	0.166139	0.235552	0.763744	0.721371	0.278909	0.413043	3.84366	2.00763	2.1187	0.120555	1.2918	0.33401	0.00181218	1.25467	up	0.000733086	1.51379	up	--	--	--	--	--	--	0.0282394	0.999465	normal	[T]	Signal transduction mechanisms	Molecular Function: calcium ion binding (GO:0005509);;	K13448|2.43542e-84|sot:102592778|K13448 calcium-binding protein CML | (RefSeq) probable calcium-binding protein CML44	Plant-pathogen interaction (ko04626)	[T]	Signal transduction mechanisms	EF hand;; EF-hand domain pair;; EF hand;; EF-hand domain;; EF-hand domain pair;; Secreted protein acidic and rich in cysteine Ca binding region	Probable calcium-binding protein CML44 OS=Arabidopsis thaliana OX=3702 GN=CML44 PE=2 SV=2	DTZ	Cell cycle control, cell division, chromosome partitioning;; Signal transduction mechanisms;; Cytoskeleton	PREDICTED: probable calcium-binding protein CML44 [Nicotiana sylvestris]	molecular function: binding (GO:0005488)
		Niben101Scf04133g02009	Niben101Scf04133g02009	0.471651	0.670534	6.40681	1.06828	1.63143	0.36385	10.068	3.5429	5.12473	0.673865	5.74177	0.744843	0.672676	0.236893	normal	6.18831e-05	1.71016	up	--	--	--	--	--	--	0.495252	0.376055	normal	--	--	Molecular Function: calcium ion binding (GO:0005509);; Cellular Component: integral component of membrane (GO:0016021);;	K02183|8.29953e-104|sot:102581338|K02183 calmodulin | (RefSeq) probable calcium-binding protein CML45	Phosphatidylinositol signaling system (ko04070);; Plant-pathogen interaction (ko04626)	[T]	Signal transduction mechanisms	EF hand;; EF-hand domain;; EF-hand domain pair;; EF hand;; EF-hand domain pair	Probable calcium-binding protein CML45 OS=Arabidopsis thaliana OX=3702 GN=CML45 PE=1 SV=1	DTZ	Cell cycle control, cell division, chromosome partitioning;; Signal transduction mechanisms;; Cytoskeleton	PREDICTED: probable calcium-binding protein CML45 [Nicotiana attenuata]	molecular function: binding (GO:0005488);; cellular component: membrane (GO:0016020);; cellular component: membrane part (GO:0044425)
		Niben101Scf05060g07008	Niben101Scf05060g07008	1.95664	1.06241	8.1604	1.33536	3.27967	0.628057	14.6141	6.43379	12.5419	1.67232	6.49739	1.17922	0.402424	0.437454	normal	1.37526e-05	1.80705	up	--	--	--	--	--	--	0.0137323	1.03533	up	--	--	Molecular Function: calcium ion binding (GO:0005509);; Cellular Component: integral component of membrane (GO:0016021);;	K02183|1.5829e-51|spen:107010362|K02183 calmodulin | (RefSeq) calmodulin	Phosphatidylinositol signaling system (ko04070);; Plant-pathogen interaction (ko04626)	[T]	Signal transduction mechanisms	EF hand;; EF-hand domain;; EF-hand domain pair;; EF hand;; EF-hand domain pair	Probable calcium-binding protein CML45 OS=Arabidopsis thaliana OX=3702 GN=CML45 PE=1 SV=1	DTZ	Cell cycle control, cell division, chromosome partitioning;; Signal transduction mechanisms;; Cytoskeleton	PREDICTED: probable calcium-binding protein CML45 [Nicotiana tomentosiformis]	molecular function: binding (GO:0005488);; cellular component: membrane (GO:0016020);; cellular component: membrane part (GO:0044425)
		Niben101Scf05813g03002	Niben101Scf05813g03002	105.152	66.6129	90.1084	50.9348	29.176	25.7844	61.1366	41.2064	45.1783	79.0329	69.7672	77.0571	1.28646e-05	-0.971966	normal	0.296086	0.454733	normal	0.848037	0.108484	normal	7.88723e-07	-1.40189	down	3.60032e-06	-0.902144	normal	[T]	Signal transduction mechanisms	Molecular Function: calcium ion binding (GO:0005509);;	K13448|6.52994e-93|sly:101266296|K13448 calcium-binding protein CML | (RefSeq) calmodulin-like protein 1	Plant-pathogen interaction (ko04626)	[T]	Signal transduction mechanisms	EF hand;; EF hand;; EF-hand domain;; EF-hand domain pair;; EF-hand domain pair;; Secreted protein acidic and rich in cysteine Ca binding region;; Cytoskeletal-regulatory complex EF hand	Calmodulin-like protein 1 OS=Arabidopsis thaliana OX=3702 GN=CML1 PE=2 SV=1	DTZ	Cell cycle control, cell division, chromosome partitioning;; Signal transduction mechanisms;; Cytoskeleton	PREDICTED: calmodulin-like protein 1 [Nicotiana attenuata]	molecular function: binding (GO:0005488)
		Niben101Scf01350g07007	Niben101Scf01350g07007	2.34524	1.47076	1.23216	3.29063	2.92809	3.17803	1.32258	1.85901	2.12408	0.576377	1.26725	1.08319	0.835153	-0.131376	normal	0.0740991	-0.652451	normal	0.452822	0.351395	normal	0.000822991	1.13283	up	0.353777	0.412202	normal	[T]	Signal transduction mechanisms	Molecular Function: calcium ion binding (GO:0005509);; Cellular Component: mitochondrion (GO:0005739);;	--	--	[T]	Signal transduction mechanisms	EF hand;; EF hand;; EF-hand domain pair;; EF-hand domain pair;; EF-hand domain;; Secreted protein acidic and rich in cysteine Ca binding region;; Cytoskeletal-regulatory complex EF hand	Calmodulin-like protein 1 OS=Arabidopsis thaliana OX=3702 GN=CML1 PE=2 SV=1	DTZ	Cell cycle control, cell division, chromosome partitioning;; Signal transduction mechanisms;; Cytoskeleton	PREDICTED: calmodulin-like protein 1 [Nicotiana sylvestris]	molecular function: binding (GO:0005488);; cellular component: cell (GO:0005623);; cellular component: organelle (GO:0043226);; cellular component: cell part (GO:0044464)
		Niben101Scf06919g00029	Niben101Scf06919g00029	1.48064	1.15861	2.75275	0.934491	1.07806	0.217635	0.271029	0.36937	0.268377	4.24353	3.47878	6.19283	--	--	--	--	--	--	0.0325507	-0.670619	normal	8.03832e-08	-2.39107	down	9.86799e-16	-2.79504	down	[T]	Signal transduction mechanisms	Biological Process: polysaccharide catabolic process (GO:0000272);; Molecular Function: calcium ion binding (GO:0005509);; Cellular Component: peroxisome (GO:0005777);;	K13448|3.4251e-75|sot:102594210|K13448 calcium-binding protein CML | (RefSeq) calmodulin-like protein 3	Plant-pathogen interaction (ko04626)	[T]	Signal transduction mechanisms	EF hand;; EF hand;; EF-hand domain;; EF-hand domain pair;; EF-hand domain pair;; Cytoskeletal-regulatory complex EF hand;; Secreted protein acidic and rich in cysteine Ca binding region;; Caleosin related protein	Calmodulin-like protein 3 OS=Arabidopsis thaliana OX=3702 GN=CML3 PE=2 SV=1	DTZ	Cell cycle control, cell division, chromosome partitioning;; Signal transduction mechanisms;; Cytoskeleton	PREDICTED: calmodulin-like protein 3 [Nicotiana attenuata]	biological process: metabolic process (GO:0008152);; molecular function: binding (GO:0005488);; cellular component: cell (GO:0005623);; cellular component: organelle (GO:0043226);; cellular component: cell part (GO:0044464)
		Niben101Scf35487g00005	Niben101Scf35487g00005	76.7267	65.385	75.2838	56.0228	61.4795	53.5702	77.4622	76.9131	75.3246	95.9047	83.7863	95.9003	0.420997	-0.162529	normal	0.000984246	0.485396	normal	0.0635271	-0.37989	normal	8.19866e-12	-1.10279	down	0.000141333	-0.58891	normal	[T]	Signal transduction mechanisms	Molecular Function: calcium ion binding (GO:0005509);; Biological Process: detection of calcium ion (GO:0005513);; Molecular Function: protein binding (GO:0005515);; Cellular Component: cytosol (GO:0005829);; Biological Process: regulation of photomorphogenesis (GO:0010099);; Biological Process: calcium-mediated signaling (GO:0019722);;	K02183|0|cit:102620326|K02183 calmodulin | (RefSeq) calmodulin-related protein-like	Phosphatidylinositol signaling system (ko04070);; Plant-pathogen interaction (ko04626)	[T]	Signal transduction mechanisms	EF hand;; EF-hand domain pair;; EF-hand domain pair;; EF-hand domain;; EF hand;; EF-hand domain;; Cytoskeletal-regulatory complex EF hand;; Secreted protein acidic and rich in cysteine Ca binding region;; EF-hand domain;; Uncharacterised protein family (UPF0154);; RNA polymerase Rpb4;; Ca2+ insensitive EF hand;; Transcription factor MotA, activation domain;; Polysaccharide biosynthesis/export pro…	Calmodulin-related protein OS=Petunia hybrida OX=4102 GN=CAM53 PE=2 SV=2	DTZ	Cell cycle control, cell division, chromosome partitioning;; Signal transduction mechanisms;; Cytoskeleton	PREDICTED: calmodulin-related protein-like [Citrus sinensis]	molecular function: binding (GO:0005488);; biological process: response to stimulus (GO:0050896);; cellular component: cell (GO:0005623);; cellular component: cell part (GO:0044464);; biological process: biological regulation (GO:0065007);; biological process: cellular process (GO:0009987);; biological process: signaling (GO:0023052);; biological process: single-organism process (GO:0044699)
	CDPKs	Niben101Scf07019g01004	Niben101Scf07019g01004	6.33167	5.2903	9.47006	4.95991	5.31755	4.80326	15.9069	12.4526	10.3868	7.80144	8.23127	6.94906	0.0758316	0.541663	normal	1.6442e-10	1.33607	up	0.79296	-0.15049	normal	4.26913e-11	-1.01707	down	0.0857238	0.390181	normal	[M]	Cell wall/membrane/envelope biogenesis	Molecular Function: calmodulin-dependent protein kinase activity (GO:0004683);; Molecular Function: calcium ion binding (GO:0005509);; Molecular Function: calmodulin binding (GO:0005516);; Molecular Function: ATP binding (GO:0005524);; Cellular Component: nucleus (GO:0005634);; Cellular Component: cytoplasm (GO:0005737);; Cellular Component: plasma membrane (GO:0005886);; Biological Process: absc…	K13412|0|sly:101260391|K13412 calcium-dependent protein kinase [EC:2.7.11.1] | (RefSeq) calcium-dependent protein kinase 18-like	Plant-pathogen interaction (ko04626)	[T]	Signal transduction mechanisms	Protein kinase domain;; Protein tyrosine kinase;; EF hand;; EF hand;; EF-hand domain pair;; EF-hand domain;; EF-hand domain pair;; Secreted protein acidic and rich in cysteine Ca binding region;; Kinase-like;; Lipopolysaccharide kinase (Kdo/WaaP) family	Calcium-dependent protein kinase 16 OS=Arabidopsis thaliana OX=3702 GN=CPK16 PE=1 SV=1	T	Signal transduction mechanisms	PREDICTED: calcium-dependent protein kinase 28-like [Nicotiana sylvestris]	biological process: metabolic process (GO:0008152);; biological process: cellular process (GO:0009987);; molecular function: catalytic activity (GO:0003824);; molecular function: binding (GO:0005488);; cellular component: cell (GO:0005623);; cellular component: organelle (GO:0043226);; cellular component: cell part (GO:0044464);; cellular component: membrane (GO:0016020);; biological process: sig…
		Niben101Scf09345g00003	Niben101Scf09345g00003	7.08796	5.40082	10.6938	3.90894	3.88293	4.16871	12.713	9.49663	7.57513	8.68987	8.23388	7.19051	0.87123	0.0899166	normal	6.31743e-08	1.27256	up	0.893782	-0.0966973	normal	3.8497e-17	-1.40675	down	0.936184	-0.033576	normal	[M]	Cell wall/membrane/envelope biogenesis	Molecular Function: calmodulin-dependent protein kinase activity (GO:0004683);; Molecular Function: calcium ion binding (GO:0005509);; Molecular Function: calmodulin binding (GO:0005516);; Molecular Function: ATP binding (GO:0005524);; Cellular Component: nucleus (GO:0005634);; Cellular Component: cytoplasm (GO:0005737);; Cellular Component: plasma membrane (GO:0005886);; Biological Process: absc…	K13412|0|sot:102590362|K13412 calcium-dependent protein kinase [EC:2.7.11.1] | (RefSeq) calcium-dependent protein kinase 28-like	Plant-pathogen interaction (ko04626)	[T]	Signal transduction mechanisms	Protein kinase domain;; Protein tyrosine kinase;; EF hand;; EF hand;; EF-hand domain pair;; EF-hand domain;; EF-hand domain pair;; Kinase-like;; Secreted protein acidic and rich in cysteine Ca binding region;; Lipopolysaccharide kinase (Kdo/WaaP) family	Calcium-dependent protein kinase 16 OS=Arabidopsis thaliana OX=3702 GN=CPK16 PE=1 SV=1	T	Signal transduction mechanisms	PREDICTED: calcium-dependent protein kinase 28-like [Nicotiana sylvestris]	biological process: metabolic process (GO:0008152);; biological process: cellular process (GO:0009987);; molecular function: catalytic activity (GO:0003824);; molecular function: binding (GO:0005488);; cellular component: cell (GO:0005623);; cellular component: organelle (GO:0043226);; cellular component: cell part (GO:0044464);; cellular component: membrane (GO:0016020);; biological process: sig…
		Niben101Scf00057g00032	Niben101Scf00057g00032	56.5884	44.3481	41.2002	33.3313	33.0804	28.8911	36.4889	37.8829	37.4801	54.9365	47.3922	65.2495	0.000293775	-0.564035	normal	0.139322	0.291434	normal	0.360395	-0.279798	normal	4.01929e-10	-1.21268	down	2.14349e-07	-0.888626	normal	[T]	Signal transduction mechanisms	Molecular Function: calmodulin-dependent protein kinase activity (GO:0004683);; Molecular Function: calcium ion binding (GO:0005509);; Molecular Function: calmodulin binding (GO:0005516);; Molecular Function: ATP binding (GO:0005524);; Cellular Component: nucleus (GO:0005634);; Cellular Component: cytoplasm (GO:0005737);; Cellular Component: plasma membrane (GO:0005886);; Biological Process: absc…	K13412|0|sly:101246133|K13412 calcium-dependent protein kinase [EC:2.7.11.1] | (RefSeq) calcium-dependent protein kinase 29	Plant-pathogen interaction (ko04626)	[T]	Signal transduction mechanisms	Protein kinase domain;; EF hand;; Protein tyrosine kinase;; EF-hand domain pair;; EF-hand domain;; EF-hand domain pair;; EF hand;; Cytoskeletal-regulatory complex EF hand;; Secreted protein acidic and rich in cysteine Ca binding region;; Copper binding proteins, plastocyanin/azurin family;; Cupredoxin-like domain	Calcium-dependent protein kinase 29 OS=Arabidopsis thaliana OX=3702 GN=CPK29 PE=2 SV=2	T	Signal transduction mechanisms	PREDICTED: calcium-dependent protein kinase 29-like [Nicotiana attenuata]	biological process: metabolic process (GO:0008152);; biological process: cellular process (GO:0009987);; molecular function: catalytic activity (GO:0003824);; molecular function: binding (GO:0005488);; cellular component: cell (GO:0005623);; cellular component: organelle (GO:0043226);; cellular component: cell part (GO:0044464);; cellular component: membrane (GO:0016020);; biological process: sig…
		Niben101Scf09296g01009	Niben101Scf09296g01009	10.2208	8.83221	14.8202	9.16513	9.42169	9.48424	23.8653	16.1075	15.6895	13.8852	16.9857	13.5997	0.211061	0.405456	normal	1.14949e-05	0.985987	normal	0.22024	-0.372394	normal	1.40062e-15	-1.07265	down	0.979489	-0.0105851	normal	[M]	Cell wall/membrane/envelope biogenesis	Molecular Function: calmodulin-dependent protein kinase activity (GO:0004683);; Molecular Function: calcium ion binding (GO:0005509);; Molecular Function: calmodulin binding (GO:0005516);; Molecular Function: ATP binding (GO:0005524);; Cellular Component: nucleus (GO:0005634);; Cellular Component: cytoplasm (GO:0005737);; Cellular Component: plasma membrane (GO:0005886);; Biological Process: absc…	K13412|0|sly:101260188|K13412 calcium-dependent protein kinase [EC:2.7.11.1] | (RefSeq) calcium-dependent protein kinase 32-like	Plant-pathogen interaction (ko04626)	[T]	Signal transduction mechanisms	Protein kinase domain;; Protein tyrosine kinase;; EF hand;; EF-hand domain pair;; EF hand;; EF-hand domain;; EF-hand domain pair;; Kinase-like;; Cytoskeletal-regulatory complex EF hand;; Lipopolysaccharide kinase (Kdo/WaaP) family	Calcium-dependent protein kinase 8 OS=Arabidopsis thaliana OX=3702 GN=CPK8 PE=1 SV=1	T	Signal transduction mechanisms	PREDICTED: calcium-dependent protein kinase 32-like [Nicotiana sylvestris]	biological process: metabolic process (GO:0008152);; biological process: cellular process (GO:0009987);; molecular function: catalytic activity (GO:0003824);; molecular function: binding (GO:0005488);; cellular component: cell (GO:0005623);; cellular component: organelle (GO:0043226);; cellular component: cell part (GO:0044464);; cellular component: membrane (GO:0016020);; biological process: sig…
		Niben101Scf00800g02008	Niben101Scf00800g02008	7.01626	4.63761	10.8291	6.00297	6.84133	6.8798	19.7083	11.0545	13.8072	5.51334	8.83717	5.70882	0.085542	0.600553	normal	2.67294e-06	1.14282	up	0.959096	0.0512553	normal	0.0443523	-0.430277	normal	0.00195878	0.752814	normal	[M]	Cell wall/membrane/envelope biogenesis	Molecular Function: calmodulin-dependent protein kinase activity (GO:0004683);; Molecular Function: calcium ion binding (GO:0005509);; Molecular Function: calmodulin binding (GO:0005516);; Molecular Function: ATP binding (GO:0005524);; Cellular Component: nucleus (GO:0005634);; Cellular Component: cytoplasm (GO:0005737);; Cellular Component: plasma membrane (GO:0005886);; Biological Process: absc…	K13412|0|spen:107002203|K13412 calcium-dependent protein kinase [EC:2.7.11.1] | (RefSeq) calcium-dependent protein kinase 32-like	Plant-pathogen interaction (ko04626)	[T]	Signal transduction mechanisms	Protein kinase domain;; Protein tyrosine kinase;; Kinase-like;; Lipopolysaccharide kinase (Kdo/WaaP) family;; EF hand;; EF-hand domain pair;; EF-hand domain;; EF hand;; EF-hand domain pair;; Secreted protein acidic and rich in cysteine Ca binding region;; Cytoskeletal-regulatory complex EF hand	Calcium-dependent protein kinase 7 OS=Arabidopsis thaliana OX=3702 GN=CPK7 PE=2 SV=1	T	Signal transduction mechanisms	PREDICTED: calcium-dependent protein kinase 7-like [Nicotiana attenuata]	biological process: metabolic process (GO:0008152);; biological process: cellular process (GO:0009987);; molecular function: catalytic activity (GO:0003824);; molecular function: binding (GO:0005488);; cellular component: cell (GO:0005623);; cellular component: organelle (GO:0043226);; cellular component: cell part (GO:0044464);; cellular component: membrane (GO:0016020);; biological process: sig…
		Niben101Scf15752g00002	Niben101Scf15752g00002	4.13571	3.21049	4.87789	3.92127	4.19577	4.16876	9.7264	6.81433	7.87877	3.31428	5.52956	2.72453	0.00565175	0.673017	normal	5.81106e-07	1.00231	up	0.988408	0.0169022	normal	0.300324	-0.310026	normal	0.0073451	0.685328	normal	[M]	Cell wall/membrane/envelope biogenesis	Molecular Function: calmodulin-dependent protein kinase activity (GO:0004683);; Molecular Function: calcium ion binding (GO:0005509);; Molecular Function: calmodulin binding (GO:0005516);; Molecular Function: ATP binding (GO:0005524);; Cellular Component: nucleus (GO:0005634);; Cellular Component: cytoplasm (GO:0005737);; Cellular Component: plasma membrane (GO:0005886);; Biological Process: absc…	K13412|0|spen:107002203|K13412 calcium-dependent protein kinase [EC:2.7.11.1] | (RefSeq) calcium-dependent protein kinase 32-like	Plant-pathogen interaction (ko04626)	[T]	Signal transduction mechanisms	Protein kinase domain;; Protein tyrosine kinase;; Kinase-like;; Lipopolysaccharide kinase (Kdo/WaaP) family;; EF hand;; EF-hand domain pair;; EF hand;; EF-hand domain;; EF-hand domain pair	Calcium-dependent protein kinase 7 OS=Arabidopsis thaliana OX=3702 GN=CPK7 PE=2 SV=1	T	Signal transduction mechanisms	PREDICTED: calcium-dependent protein kinase 7-like isoform X1 [Nicotiana sylvestris]	biological process: metabolic process (GO:0008152);; biological process: cellular process (GO:0009987);; molecular function: catalytic activity (GO:0003824);; molecular function: binding (GO:0005488);; cellular component: cell (GO:0005623);; cellular component: organelle (GO:0043226);; cellular component: cell part (GO:0044464);; cellular component: membrane (GO:0016020);; biological process: sig…
	Ca2+ flux	Niben101Scf11325g00011	Niben101Scf11325g00011	5.8477	3.67183	4.88409	6.05635	7.35975	6.94916	16.2705	12.0071	13.384	4.49564	4.25943	3.97166	4.15326e-09	1.17852	up	2.38066e-09	1.05611	up	0.899159	0.0813725	normal	0.209331	0.234532	normal	1.26741e-15	1.30267	up	[P]	Inorganic ion transport and metabolism	Molecular Function: calcium-transporting ATPase activity (GO:0005388);; Molecular Function: calmodulin binding (GO:0005516);; Molecular Function: ATP binding (GO:0005524);; Cellular Component: integral component of plasma membrane (GO:0005887);; Cellular Component: intracellular membrane-bounded organelle (GO:0043231);; Molecular Function: metal ion binding (GO:0046872);; Biological Process: calc…	K01537|0|sot:102589419|K01537 Ca2+-transporting ATPase [EC:3.6.3.8] | (RefSeq) calcium-transporting ATPase 2, plasma membrane-type-like	--	[P]	Inorganic ion transport and metabolism	E1-E2 ATPase;; Cation transporting ATPase, C-terminus;; Ca2+-ATPase N terminal autoinhibitory domain;; Cation transport ATPase (P-type);; haloacid dehalogenase-like hydrolase;; Cation transporter/ATPase, N-terminus;; haloacid dehalogenase-like hydrolase	Calcium-transporting ATPase 2, plasma membrane-type OS=Arabidopsis thaliana OX=3702 GN=ACA2 PE=1 SV=1	P	Inorganic ion transport and metabolism	PREDICTED: calcium-transporting ATPase 2, plasma membrane-type-like [Nicotiana attenuata]	biological process: localization (GO:0051179);; molecular function: catalytic activity (GO:0003824);; molecular function: transporter activity (GO:0005215);; molecular function: binding (GO:0005488);; cellular component: cell (GO:0005623);; cellular component: membrane (GO:0016020);; cellular component: membrane part (GO:0044425);; cellular component: cell part (GO:0044464);; cellular component: …
note: P+H, PBS solution + H2O; P+B, PBS solution + boron; C+H, CGMMV + H2O; C+B, CGMMV + boron.

## Sheet: ROS metabolism
Supplementary Table 10. DEGs of various biological functional classifications.
ROS metabolism	Gene abbreviation	Gene ID	Gene_name	P+B-1	P+B-2	P+B-3	C+H-1	C+H-2	C+H-3	C+B-1	C+B-2	C+B-3	P+H-1	P+H-2	P+H-3	P+B-1_P+B-2_P+B-3_vs._C+B-1_C+B-2_C+B-3_DESeq2_FDR	P+B-1_P+B-2_P+B-3_vs._C+B-1_C+B-2_C+B-3_DESeq2_log2FC	P+B-1_P+B-2_P+B-3_vs._C+B-1_C+B-2_C+B-3_DESeq2_(FDR_0.05_FC_2)_regulated	C+H-1_C+H-2_C+H-3_vs._C+B-1_C+B-2_C+B-3_DESeq2_FDR	C+H-1_C+H-2_C+H-3_vs._C+B-1_C+B-2_C+B-3_DESeq2_log2FC	C+H-1_C+H-2_C+H-3_vs._C+B-1_C+B-2_C+B-3_DESeq2_(FDR_0.05_FC_2)_regulated	P+H-1_P+H-2_P+H-3_vs._P+B-1_P+B-2_P+B-3_DESeq2_FDR	P+H-1_P+H-2_P+H-3_vs._P+B-1_P+B-2_P+B-3_DESeq2_log2FC	P+H-1_P+H-2_P+H-3_vs._P+B-1_P+B-2_P+B-3_DESeq2_(FDR_0.05_FC_2)_regulated	P+H-1_P+H-2_P+H-3_vs._C+H-1_C+H-2_C+H-3_DESeq2_FDR	P+H-1_P+H-2_P+H-3_vs._C+H-1_C+H-2_C+H-3_DESeq2_log2FC	P+H-1_P+H-2_P+H-3_vs._C+H-1_C+H-2_C+H-3_DESeq2_(FDR_0.05_FC_2)_regulated	P+H-1_P+H-2_P+H-3_vs._C+B-1_C+B-2_C+B-3_DESeq2_FDR	P+H-1_P+H-2_P+H-3_vs._C+B-1_C+B-2_C+B-3_DESeq2_log2FC	P+H-1_P+H-2_P+H-3_vs._C+B-1_C+B-2_C+B-3_DESeq2_(FDR_0.05_FC_2)_regulated	COG_class	COG_class_annotation	GO_annotation	KEGG_annotation	KEGG_pathway_annotation	KOG_class	KOG_class_annotation	Pfam_annotation	Swiss_Prot_annotation	eggNOG_class	eggNOG_class_annotation	NR_annotation	GO_second_level_annotation
ROS scavenging	GME	Niben101Scf01696g06050	Niben101Scf01696g06050	75.8251	102.849	79.4229	437.549	395.13	452.977	156.617	489.382	423.617	76.4848	86.5809	91.8996	0.000783478	1.23684	up	0.796367	-0.164619	normal	0.925783	-0.0541453	normal	6.27e-37	1.8663	up	0.000553375	1.27638	up	[M]	Cell wall/membrane/envelope biogenesis	Molecular Function: RNA polymerase II transcription cofactor activity (GO:0001104);; Biological Process: regulation of transcription from RNA polymerase II promoter (GO:0006357);; Cellular Component: mediator complex (GO:0016592);; Molecular Function: GDP-mannose 3,5-epimerase activity (GO:0047918);; Molecular Function: coenzyme binding (GO:0050662);;	K10046|0|sly:100316902|K10046 GDP-D-mannose 3', 5'-epimerase [EC:5.1.3.18 5.1.3.-] | (RefSeq) GME1; GDP-mannose 3',5'-epimerase	Ascorbate and aldarate metabolism (ko00053);; Amino sugar and nucleotide sugar metabolism (ko00520)	[GM]	Carbohydrate transport and metabolism;; Cell wall/membrane/envelope biogenesis	NAD dependent epimerase/dehydratase family;; GDP-mannose 4,6 dehydratase;; 3-beta hydroxysteroid dehydrogenase/isomerase family;; NAD(P)H-binding;; Male sterility protein;; Polysaccharide biosynthesis protein	GDP-mannose 3,5-epimerase 1 OS=Oryza sativa subsp. indica OX=39946 GN=OsI_032456 PE=2 SV=1	M	Cell wall/membrane/envelope biogenesis	PREDICTED: GDP-mannose 3,5-epimerase 1-like [Nicotiana sylvestris]	biological process: biological regulation (GO:0065007);; molecular function: transcription factor activity, protein binding (GO:0000988);; cellular component: cell (GO:0005623);; cellular component: membrane-enclosed lumen (GO:0031974);; cellular component: macromolecular complex (GO:0032991);; cellular component: organelle (GO:0043226);; cellular component: organelle part (GO:0044422);; cellular…
	GGP	Niben101Scf00726g02017	Niben101Scf00726g02017	124.423	68.948	136.215	78.7621	47.0794	126.018	149.872	139.383	109.396	127.767	134.213	143.316	0.971929	0.0208053	normal	0.134338	0.615677	normal	0.447592	-0.29212	normal	0.000949586	-1.02557	down	0.0783409	-0.348635	normal	[F]	Nucleotide transport and metabolism	Cellular Component: cytoplasm (GO:0005737);; Biological Process: glucose metabolic process (GO:0006006);; Molecular Function: nucleotidyltransferase activity (GO:0016779);; Molecular Function: GDP-L-galactose phosphorylase activity (GO:0080047);; Molecular Function: GDP-D-glucose phosphorylase activity (GO:0080048);;	K14190|6.24844e-140|sot:102596542|K14190 GDP-L-galactose phosphorylase [EC:2.7.7.69] | (RefSeq) GDP-L-galactose phosphorylase 1-like	Ascorbate and aldarate metabolism (ko00053)	[R]	General function prediction only	--	GDP-L-galactose phosphorylase 1 OS=Arabidopsis thaliana OX=3702 GN=VTC2 PE=1 SV=1	S	Function unknown	PREDICTED: GDP-L-galactose phosphorylase 1-like [Nicotiana attenuata]	cellular component: cell (GO:0005623);; cellular component: cell part (GO:0044464);; biological process: metabolic process (GO:0008152);; biological process: single-organism process (GO:0044699);; molecular function: catalytic activity (GO:0003824)
	GGP	Niben101Scf08035g00004	Niben101Scf08035g00004	19.9848	16.7839	23.8898	15.8712	14.6597	18.3769	29.2619	20.729	19.8362	22.1115	27.4474	24.9069	0.926746	-0.0436257	normal	0.0485981	0.54233	normal	0.238286	-0.317074	normal	2.41e-10	-1.00856	down	0.0562458	-0.405484	normal	[F]	Nucleotide transport and metabolism	Cellular Component: cytoplasm (GO:0005737);; Biological Process: glucose metabolic process (GO:0006006);; Molecular Function: GDP-D-glucose phosphorylase activity (GO:0080048);;	K14190|0|sly:101255942|K14190 GDP-L-galactose phosphorylase [EC:2.7.7.69] | (RefSeq) GDP-L-galactose phosphorylase 2	Ascorbate and aldarate metabolism (ko00053)	[R]	General function prediction only	--	GDP-L-galactose phosphorylase 1 OS=Arabidopsis thaliana OX=3702 GN=VTC2 PE=1 SV=1	S	Function unknown	uncharacterized protein A4U43_C06F16780 [Asparagus officinalis]	cellular component: cell (GO:0005623);; cellular component: cell part (GO:0044464);; biological process: metabolic process (GO:0008152);; biological process: single-organism process (GO:0044699);; molecular function: catalytic activity (GO:0003824)
	AO	Niben101Scf03141g10006	Niben101Scf03141g10006	0.639371	1.01424	0.593852	0.870221	1.98968	0.988262	0.316203	0.261729	0.51191	0.31877	0.175496	0.270869	0.0155787	-0.916751	down	0.00210316	-1.26743	down	0.036612	0.65884	up	0.000198045	1.53999	up	--	--	--	[DPM]	Cell cycle control, cell division, chromosome partitioning;; Inorganic ion transport and metabolism;; Cell wall/membrane/envelope biogenesis	Molecular Function: copper ion binding (GO:0005507);; Cellular Component: plant-type cell wall (GO:0009505);; Cellular Component: plasmodesma (GO:0009506);; Molecular Function: oxidoreductase activity, oxidizing metal ions (GO:0016722);; Biological Process: oxidation-reduction process (GO:0055114);;	--	--	[Q]	Secondary metabolites biosynthesis, transport and catabolism	Multicopper oxidase;; Multicopper oxidase;; Multicopper oxidase	L-ascorbate oxidase homolog OS=Brassica napus OX=3708 GN=Bp10 PE=2 SV=1	Q	Secondary metabolites biosynthesis, transport and catabolism	PREDICTED: L-ascorbate oxidase homolog [Nicotiana tabacum]	molecular function: binding (GO:0005488);; cellular component: cell (GO:0005623);; cellular component: cell part (GO:0044464);; cellular component: cell junction (GO:0030054);; biological process: metabolic process (GO:0008152);; biological process: single-organism process (GO:0044699);; molecular function: catalytic activity (GO:0003824)
	AO	Niben101Scf34287g00002	Niben101Scf34287g00002	0.317488	0.6518	0.647391	1.96075	3.32366	0.906156	0.169275	0.322629	0.561884	0.247314	0.470032	0.291421	0.319193	-0.51401	normal	0.00024663	-1.58494	down	0.669627	0.244052	normal	3.9e-05	1.76553	up	--	--	--	[DPM]	Cell cycle control, cell division, chromosome partitioning;; Inorganic ion transport and metabolism;; Cell wall/membrane/envelope biogenesis	Molecular Function: copper ion binding (GO:0005507);; Molecular Function: L-ascorbate oxidase activity (GO:0008447);; Cellular Component: plant-type cell wall (GO:0009505);; Cellular Component: plasmodesma (GO:0009506);; Molecular Function: oxidoreductase activity, oxidizing metal ions (GO:0016722);; Biological Process: oxidation-reduction process (GO:0055114);;	--	--	[Q]	Secondary metabolites biosynthesis, transport and catabolism	Multicopper oxidase;; Multicopper oxidase;; Multicopper oxidase	L-ascorbate oxidase homolog OS=Brassica napus OX=3708 GN=Bp10 PE=2 SV=1	Q	Secondary metabolites biosynthesis, transport and catabolism	PREDICTED: L-ascorbate oxidase homolog [Nicotiana tomentosiformis]	molecular function: binding (GO:0005488);; biological process: metabolic process (GO:0008152);; biological process: single-organism process (GO:0044699);; molecular function: catalytic activity (GO:0003824);; cellular component: cell (GO:0005623);; cellular component: cell part (GO:0044464);; cellular component: cell junction (GO:0030054)
	AO	Niben101Scf15536g03005	Niben101Scf15536g03005	0.770292	1.16545	1.16676	1.92699	4.93594	1.57522	0.222485	0.84771	1.01195	0.841536	1.2314	0.573391	--	--	--	0.0292098	-1.1058	down	--	--	--	0.0645302	0.944232	normal	--	--	--	--	--	Molecular Function: copper ion binding (GO:0005507);; Molecular Function: L-ascorbate oxidase activity (GO:0008447);; Cellular Component: plant-type cell wall (GO:0009505);; Cellular Component: plasmodesma (GO:0009506);; Molecular Function: oxidoreductase activity, oxidizing metal ions (GO:0016722);; Biological Process: oxidation-reduction process (GO:0055114);;	--	--	[Q]	Secondary metabolites biosynthesis, transport and catabolism	Multicopper oxidase;; Multicopper oxidase	L-ascorbate oxidase homolog OS=Brassica napus OX=3708 GN=Bp10 PE=2 SV=1	Q	Secondary metabolites biosynthesis, transport and catabolism	PREDICTED: L-ascorbate oxidase homolog isoform X2 [Nicotiana sylvestris]	molecular function: binding (GO:0005488);; biological process: metabolic process (GO:0008152);; biological process: single-organism process (GO:0044699);; molecular function: catalytic activity (GO:0003824);; cellular component: cell (GO:0005623);; cellular component: cell part (GO:0044464);; cellular component: cell junction (GO:0030054)
	AO	Niben101Scf04711g00016	Niben101Scf04711g00016	6.45012	11.9027	5.68472	17.2358	31.4716	15.5981	4.08813	6.21695	10.6342	5.45338	6.51431	5.17594	0.45032	-0.349207	normal	0.000412527	-1.25524	down	0.489379	0.29585	normal	4.14e-08	1.37988	up	0.932419	-0.0458169	normal	[DPM]	Cell cycle control, cell division, chromosome partitioning;; Inorganic ion transport and metabolism;; Cell wall/membrane/envelope biogenesis	Molecular Function: copper ion binding (GO:0005507);; Cellular Component: plant-type cell wall (GO:0009505);; Cellular Component: plasmodesma (GO:0009506);; Molecular Function: oxidoreductase activity, oxidizing metal ions (GO:0016722);; Molecular Function: pectinesterase activity (GO:0030599);; Biological Process: oxidation-reduction process (GO:0055114);;	--	--	[Q]	Secondary metabolites biosynthesis, transport and catabolism	Multicopper oxidase;; Multicopper oxidase;; Multicopper oxidase	L-ascorbate oxidase homolog OS=Nicotiana tabacum OX=4097 PE=2 SV=1	Q	Secondary metabolites biosynthesis, transport and catabolism	l-ascorbate oxidase-like protein [Nicotiana attenuata]	molecular function: binding (GO:0005488);; cellular component: cell (GO:0005623);; cellular component: cell part (GO:0044464);; cellular component: cell junction (GO:0030054);; biological process: metabolic process (GO:0008152);; biological process: single-organism process (GO:0044699);; molecular function: catalytic activity (GO:0003824)
	AO	Niben101Scf05385g02008	Niben101Scf05385g02008	10.2319	15.4692	7.51391	25.7313	47.1486	25.6061	9.06898	12.4861	19.5399	8.15479	9.47729	6.75656	0.932327	0.0522048	normal	0.00288789	-1.00771	down	0.496418	0.279261	normal	3.41e-10	1.49126	up	0.238759	0.370257	normal	[DPM]	Cell cycle control, cell division, chromosome partitioning;; Inorganic ion transport and metabolism;; Cell wall/membrane/envelope biogenesis	Molecular Function: copper ion binding (GO:0005507);; Cellular Component: plant-type cell wall (GO:0009505);; Cellular Component: plasmodesma (GO:0009506);; Molecular Function: oxidoreductase activity, oxidizing metal ions (GO:0016722);; Molecular Function: pectinesterase activity (GO:0030599);; Biological Process: oxidation-reduction process (GO:0055114);;	--	--	[Q]	Secondary metabolites biosynthesis, transport and catabolism	Multicopper oxidase;; Multicopper oxidase;; Multicopper oxidase	L-ascorbate oxidase homolog OS=Nicotiana tabacum OX=4097 PE=2 SV=1	Q	Secondary metabolites biosynthesis, transport and catabolism	l-ascorbate oxidase-like protein [Nicotiana attenuata]	molecular function: binding (GO:0005488);; cellular component: cell (GO:0005623);; cellular component: cell part (GO:0044464);; cellular component: cell junction (GO:0030054);; biological process: metabolic process (GO:0008152);; biological process: single-organism process (GO:0044699);; molecular function: catalytic activity (GO:0003824)
	MDAR	Niben101Scf13186g03006	Niben101Scf13186g03006	27.8965	23.4947	28.5047	18.5248	19.0117	18.4671	22.8699	22.0733	19.5049	26.9846	26.9843	31.3008	0.00229966	-0.530799	normal	0.221988	0.265373	normal	0.681647	-0.154104	normal	7.36e-11	-1.01985	down	6.07e-06	-0.718138	down	[I]	Lipid transport and metabolism	Cellular Component: peroxisomal membrane (GO:0005778);; Cellular Component: chloroplast envelope (GO:0009941);; Cellular Component: integral component of membrane (GO:0016021);; Molecular Function: monodehydroascorbate reductase (NADH) activity (GO:0016656);; Biological Process: hydrogen peroxide catabolic process (GO:0042744);; Molecular Function: flavin adenine dinucleotide binding (GO:0050660)…	K08232|0|sot:102595145|K08232 monodehydroascorbate reductase (NADH) [EC:1.6.5.4] | (RefSeq) monodehydroascorbate reductase 4, peroxisomal	Ascorbate and aldarate metabolism (ko00053)	[R]	General function prediction only	Pyridine nucleotide-disulphide oxidoreductase;; Pyridine nucleotide-disulphide oxidoreductase;; Pyridine nucleotide-disulphide oxidoreductase	Monodehydroascorbate reductase 4, peroxisomal OS=Arabidopsis thaliana OX=3702 GN=MDAR4 PE=1 SV=1	S	Function unknown	PREDICTED: probable monodehydroascorbate reductase, cytoplasmic isoform 2 [Nicotiana sylvestris]	cellular component: cell (GO:0005623);; cellular component: membrane (GO:0016020);; cellular component: organelle (GO:0043226);; cellular component: organelle part (GO:0044422);; cellular component: cell part (GO:0044464);; cellular component: membrane part (GO:0044425);; biological process: metabolic process (GO:0008152);; biological process: single-organism process (GO:0044699);; molecular func…
	MDAR	Niben101Scf00254g00005	Niben101Scf00254g00005	1.89783	1.10751	1.23796	0.876824	0.818146	0.872921	1.19934	2.11453	1.20459	1.64712	2.28759	1.60958	--	--	--	--	--	--	0.748821	-0.205581	normal	0.00267106	-1.2642	down	0.313607	-0.469437	normal	--	--	Molecular Function: ATP binding (GO:0005524);; Cellular Component: mitochondrion (GO:0005739);; Cellular Component: chloroplast stroma (GO:0009570);; Cellular Component: stromule (GO:0010319);; Molecular Function: monodehydroascorbate reductase (NADH) activity (GO:0016656);; Biological Process: oxidation-reduction process (GO:0055114);;	K08232|5.79994e-37|sot:102583368|K08232 monodehydroascorbate reductase (NADH) [EC:1.6.5.4] | (RefSeq) monodehydroascorbate reductase 5, mitochondrial	Ascorbate and aldarate metabolism (ko00053)	[R]	General function prediction only	--	Monodehydroascorbate reductase, chloroplastic/mitochondrial OS=Arabidopsis thaliana OX=3702 GN=MDAR5 PE=1 SV=3	S	Function unknown	PREDICTED: monodehydroascorbate reductase,MDHAR,单脱氢抗坏血酸还原酶,抗坏血酸-谷胱甘肽循环中,可以将氧化型抗坏血酸(MDHA)还原为还原型抗坏血酸(AsA) chloroplastic isoform X1 [Nicotiana sylvestris]	molecular function: binding (GO:0005488);; cellular component: cell (GO:0005623);; cellular component: organelle (GO:0043226);; cellular component: cell part (GO:0044464);; cellular component: organelle part (GO:0044422);; biological process: metabolic process (GO:0008152);; biological process: single-organism process (GO:0044699);; molecular function: catalytic activity (GO:0003824)
	NAT	Niben101Scf01203g01008	Niben101Scf01203g01008	0.681914	0.707219	0.371551	0.93659	3.52577	1.23131	0.507314	0.384487	0.462839	0.252841	0.299136	0.388771	0.229093	-0.493997	normal	0.000558206	-1.42108	down	0.296999	0.429654	normal	2.54e-05	1.75162	up	0.814526	0.129951	normal	[F]	Nucleotide transport and metabolism	Molecular Function: transporter activity (GO:0005215);; Cellular Component: integral component of membrane (GO:0016021);; Biological Process: transmembrane transport (GO:0055085);;	K14611|0|sot:102604223|K14611 solute carrier family 23 (nucleobase transporter), member 1/2 | (RefSeq) nucleobase-ascorbate transporter 2	--	[F]	Nucleotide transport and metabolism	Permease family;; GDP-fucose protein O-fucosyltransferase;; GDP-fucose protein O-fucosyltransferase	Nucleobase-ascorbate transporter 2 OS=Arabidopsis thaliana OX=3702 GN=NAT2 PE=2 SV=2	F	Nucleotide transport and metabolism	PREDICTED: nucleobase-ascorbate transporter 2 [Nicotiana attenuata]	molecular function: transporter activity (GO:0005215);; cellular component: membrane (GO:0016020);; cellular component: membrane part (GO:0044425);; biological process: localization (GO:0051179)
	NAT	Niben101Scf14458g00009	Niben101Scf14458g00009	0.606043	1.2514	0.718711	1.06175	2.39499	1.15953	0.434802	0.548998	0.704418	0.41376	0.955343	0.47272	0.0824584	-0.663835	normal	0.00436901	-1.0912	down	0.718143	0.222864	normal	0.0600344	0.772346	normal	0.409723	-0.364833	normal	[F]	Nucleotide transport and metabolism	Molecular Function: transporter activity (GO:0005215);; Cellular Component: integral component of membrane (GO:0016021);; Biological Process: transmembrane transport (GO:0055085);;	K14611|0|sot:102604223|K14611 solute carrier family 23 (nucleobase transporter), member 1/2 | (RefSeq) nucleobase-ascorbate transporter 2	--	[F]	Nucleotide transport and metabolism	Permease family;; GDP-fucose protein O-fucosyltransferase;; GDP-fucose protein O-fucosyltransferase	Nucleobase-ascorbate transporter 2 OS=Arabidopsis thaliana OX=3702 GN=NAT2 PE=2 SV=2	F	Nucleotide transport and metabolism	PREDICTED: nucleobase-ascorbate transporter 2 [Nicotiana sylvestris]	molecular function: transporter activity (GO:0005215);; cellular component: membrane (GO:0016020);; cellular component: membrane part (GO:0044425);; biological process: localization (GO:0051179)
	NAT	Niben101Scf06720g01021	Niben101Scf06720g01021	0.412622	0.732566	0.439892	1.12873	1.86207	1.38513	0.551394	0.456829	0.919274	0.417041	0.516352	0.244545	0.966994	0.0330563	normal	0.0306261	-0.872337	down	0.839511	0.150598	normal	0.000433118	1.27188	up	0.608704	0.27857	normal	[F]	Nucleotide transport and metabolism	Molecular Function: transporter activity (GO:0005215);; Cellular Component: integral component of membrane (GO:0016021);; Biological Process: transmembrane transport (GO:0055085);;	--	--	[F]	Nucleotide transport and metabolism	Permease family	Nucleobase-ascorbate transporter 6 OS=Arabidopsis thaliana OX=3702 GN=NAT6 PE=2 SV=2	F	Nucleotide transport and metabolism	PREDICTED: nucleobase-ascorbate transporter 6-like isoform X1 [Nicotiana tabacum]	molecular function: transporter activity (GO:0005215);; cellular component: membrane (GO:0016020);; cellular component: membrane part (GO:0044425);; biological process: localization (GO:0051179)
	NAT	Niben101Scf14028g02012	Niben101Scf14028g02012	0.544647	0.988978	0.391624	1.63597	3.09709	1.33579	0.16903	0.556528	0.887784	0.23389	0.653597	0.371857	0.63987	-0.294951	normal	0.00736477	-1.22915	down	0.69413	0.234332	normal	4.68e-05	1.57382	up	0.981661	0.0191294	normal	[F]	Nucleotide transport and metabolism	Molecular Function: transporter activity (GO:0005215);; Cellular Component: integral component of membrane (GO:0016021);; Biological Process: transmembrane transport (GO:0055085);;	--	--	[F]	Nucleotide transport and metabolism	Permease family	Nucleobase-ascorbate transporter 7 OS=Arabidopsis thaliana OX=3702 GN=NAT7 PE=2 SV=2	F	Nucleotide transport and metabolism	PREDICTED: nucleobase-ascorbate transporter 7-like [Nicotiana attenuata]	molecular function: transporter activity (GO:0005215);; cellular component: membrane (GO:0016020);; cellular component: membrane part (GO:0044425);; biological process: localization (GO:0051179)
	SOD	Niben101Ctg14566g00003	Niben101Ctg14566g00003	35.931	32.6936	32.5496	115.493	103.899	132.487	60.5217	97.0581	97.5276	41.0158	43.3955	36.1316	5.87e-07	1.00145	up	0.267039	-0.364617	normal	0.142778	-0.301151	normal	4.43e-11	1.09068	up	0.00090571	0.692739	up	[P]	Inorganic ion transport and metabolism	Molecular Function: superoxide dismutase activity (GO:0004784);; Molecular Function: copper ion binding (GO:0005507);; Cellular Component: nucleus (GO:0005634);; Cellular Component: cytosol (GO:0005829);; Molecular Function: zinc ion binding (GO:0008270);; Biological Process: removal of superoxide radicals (GO:0019430);; Biological Process: oxidation-reduction process (GO:0055114);;	K04565|2.33338e-54|spen:107007989|K04565 superoxide dismutase, Cu-Zn family [EC:1.15.1.1] | (RefSeq) superoxide dismutase [Cu-Zn] 2	Peroxisome (ko04146)	[P]	Inorganic ion transport and metabolism	Copper/zinc superoxide dismutase (SODC)	Superoxide dismutase [Cu-Zn] OS=Nicotiana plumbaginifolia OX=4092 GN=SODCC PE=2 SV=2	P	Inorganic ion transport and metabolism	PREDICTED: superoxide dismutase [Cu-Zn] isoform X1 [Nicotiana tabacum]	biological process: metabolic process (GO:0008152);; biological process: cellular process (GO:0009987);; biological process: single-organism process (GO:0044699);; biological process: response to stimulus (GO:0050896);; biological process: detoxification (GO:0098754);; molecular function: catalytic activity (GO:0003824);; molecular function: antioxidant activity (GO:0016209);; molecular function:…
	SOD	Niben101Scf00163g08018	Niben101Scf00163g08018	1.88464	2.1498	2.36296	5.60402	8.33036	5.09132	1.76438	3.90647	4.69442	1.32254	2.26201	0.852497	0.462707	0.344522	normal	0.140141	-0.648828	normal	0.610645	0.272275	normal	3.15e-06	1.51343	up	0.0845936	0.69406	normal	[P]	Inorganic ion transport and metabolism	Molecular Function: superoxide dismutase activity (GO:0004784);; Biological Process: removal of superoxide radicals (GO:0019430);; Molecular Function: metal ion binding (GO:0046872);; Biological Process: oxidation-reduction process (GO:0055114);;	K04564|2.10399e-155|sot:102594810|K04564 superoxide dismutase, Fe-Mn family [EC:1.15.1.1] | (RefSeq) superoxide dismutase [Fe], chloroplastic	Peroxisome (ko04146)	[P]	Inorganic ion transport and metabolism	Iron/manganese superoxide dismutases, C-terminal domain;; Iron/manganese superoxide dismutases, alpha-hairpin domain	Superoxide dismutase [Fe] 2, chloroplastic OS=Arabidopsis thaliana OX=3702 GN=FSD2 PE=1 SV=1	P	Inorganic ion transport and metabolism	PREDICTED: superoxide dismutase [Fe], chloroplastic-like [Nicotiana attenuata]	biological process: metabolic process (GO:0008152);; biological process: cellular process (GO:0009987);; biological process: single-organism process (GO:0044699);; biological process: response to stimulus (GO:0050896);; biological process: detoxification (GO:0098754);; molecular function: catalytic activity (GO:0003824);; molecular function: antioxidant activity (GO:0016209);; molecular function:…
	SOD	Niben101Scf00436g05003	Niben101Scf00436g05003	4.389	6.17117	4.79114	84.6548	56.8145	59.9099	19.2772	52.3947	46.1299	5.63049	4.58073	5.25049	1.57e-15	2.19024	up	0.179685	-0.590669	normal	0.927523	-0.0708008	normal	4.51e-42	3.10687	up	9.65e-16	2.19455	up	[P]	Inorganic ion transport and metabolism	Molecular Function: peroxidase activity (GO:0004601);; Molecular Function: superoxide dismutase activity (GO:0004784);; Molecular Function: copper ion binding (GO:0005507);; Molecular Function: zinc ion binding (GO:0008270);; Cellular Component: chloroplast stroma (GO:0009570);; Cellular Component: thylakoid (GO:0009579);; Biological Process: removal of superoxide radicals (GO:0019430);; Cellular…	K04565|6.10787e-99|spen:107004942|K04565 superoxide dismutase, Cu-Zn family [EC:1.15.1.1] | (RefSeq) superoxide dismutase [Cu-Zn], chloroplastic	Peroxisome (ko04146)	[P]	Inorganic ion transport and metabolism	Copper/zinc superoxide dismutase (SODC)	Superoxide dismutase [Cu-Zn], chloroplastic OS=Petunia hybrida OX=4102 GN=SODCP PE=2 SV=1	P	Inorganic ion transport and metabolism	PREDICTED: superoxide dismutase [Cu-Zn], chloroplastic [Nicotiana tabacum]	biological process: metabolic process (GO:0008152);; biological process: cellular process (GO:0009987);; biological process: single-organism process (GO:0044699);; biological process: response to stimulus (GO:0050896);; biological process: detoxification (GO:0098754);; molecular function: catalytic activity (GO:0003824);; molecular function: antioxidant activity (GO:0016209);; molecular function:…
	SOD	Niben101Scf06799g01001	Niben101Scf06799g01001	3.63456	3.42598	3.7458	27.6046	19.2874	21.511	8.22466	21.1793	19.3248	3.37067	3.64108	3.64891	2.78e-08	1.56909	up	0.480778	-0.357513	normal	0.957843	-0.0441713	normal	2.13e-22	2.15335	up	1.72e-08	1.57545	up	[P]	Inorganic ion transport and metabolism	Molecular Function: peroxidase activity (GO:0004601);; Molecular Function: superoxide dismutase activity (GO:0004784);; Molecular Function: copper ion binding (GO:0005507);; Molecular Function: zinc ion binding (GO:0008270);; Cellular Component: chloroplast stroma (GO:0009570);; Cellular Component: thylakoid (GO:0009579);; Biological Process: removal of superoxide radicals (GO:0019430);; Cellular…	K04565|1.14046e-72|spen:107004942|K04565 superoxide dismutase, Cu-Zn family [EC:1.15.1.1] | (RefSeq) superoxide dismutase [Cu-Zn], chloroplastic	Peroxisome (ko04146)	[P]	Inorganic ion transport and metabolism	Copper/zinc superoxide dismutase (SODC)	Superoxide dismutase [Cu-Zn], chloroplastic OS=Petunia hybrida OX=4102 GN=SODCP PE=2 SV=1	P	Inorganic ion transport and metabolism	PREDICTED: superoxide dismutase [Cu-Zn], chloroplastic [Nicotiana attenuata]	biological process: metabolic process (GO:0008152);; biological process: cellular process (GO:0009987);; biological process: single-organism process (GO:0044699);; biological process: response to stimulus (GO:0050896);; biological process: detoxification (GO:0098754);; molecular function: catalytic activity (GO:0003824);; molecular function: antioxidant activity (GO:0016209);; molecular function:…
	SOD	Niben101Scf06912g01020	Niben101Scf06912g01020	4.51989	4.60514	5.46556	30.1965	21.3737	29.8226	16.7382	28.3919	27.0819	7.25537	5.31375	6.22193	3.77447e-19	1.85693	up	0.853032	-0.0995208	normal	0.208018	-0.369545	normal	4.10561e-12	1.59932	up	5.19696e-11	1.44894	up	[P]	Inorganic ion transport and metabolism	Molecular Function: superoxide dismutase activity (GO:0004784);; Molecular Function: zinc ion binding (GO:0008270);; Cellular Component: chloroplast stroma (GO:0009570);; Molecular Function: superoxide dismutase copper chaperone activity (GO:0016532);; Biological Process: removal of superoxide radicals (GO:0019430);; Biological Process: metal ion transport (GO:0030001);; Biological Process: posit…	K04569|7.83846e-165|sot:102598129|K04569 copper chaperone for superoxide dismutase | (RefSeq) copper chaperone for superoxide dismutase, chloroplastic/cytosolic	--	[P]	Inorganic ion transport and metabolism	Heavy-metal-associated domain;; Copper/zinc superoxide dismutase (SODC)	Copper chaperone for superoxide dismutase, chloroplastic/cytosolic OS=Arabidopsis thaliana OX=3702 GN=CCS PE=1 SV=1	S	Function unknown	PREDICTED: copper chaperone for superoxide dismutase, chloroplastic/cytosolic isoform X1 [Nicotiana tomentosiformis]	biological process: metabolic process (GO:0008152);; biological process: cellular process (GO:0009987);; biological process: single-organism process (GO:0044699);; biological process: response to stimulus (GO:0050896);; biological process: detoxification (GO:0098754);; molecular function: catalytic activity (GO:0003824);; molecular function: antioxidant activity (GO:0016209);; molecular function:…
	SOD	Niben101Scf11604g00006	Niben101Scf11604g00006	10.1986	9.60582	8.8414	30.8506	27.3959	32.1672	21.01	35.5779	32.4042	10.2372	10.2717	9.64992	4.34e-10	1.26858	up	0.942582	0.0407662	normal	0.727518	-0.1369	normal	6.8e-12	1.12694	up	2.33e-08	1.13186	up	[P]	Inorganic ion transport and metabolism	Molecular Function: superoxide dismutase activity (GO:0004784);; Molecular Function: zinc ion binding (GO:0008270);; Cellular Component: chloroplast stroma (GO:0009570);; Molecular Function: superoxide dismutase copper chaperone activity (GO:0016532);; Biological Process: removal of superoxide radicals (GO:0019430);; Biological Process: metal ion transport (GO:0030001);; Biological Process: posit…	K04569|1.06614e-179|sot:102598129|K04569 copper chaperone for superoxide dismutase | (RefSeq) copper chaperone for superoxide dismutase, chloroplastic/cytosolic	--	[P]	Inorganic ion transport and metabolism	Heavy-metal-associated domain;; Copper/zinc superoxide dismutase (SODC)	Copper chaperone for superoxide dismutase, chloroplastic/cytosolic OS=Arabidopsis thaliana OX=3702 GN=CCS PE=1 SV=1	S	Function unknown	PREDICTED: copper chaperone for superoxide dismutase, chloroplastic/cytosolic isoform X1 [Nicotiana sylvestris]	biological process: metabolic process (GO:0008152);; biological process: cellular process (GO:0009987);; biological process: single-organism process (GO:0044699);; biological process: response to stimulus (GO:0050896);; biological process: detoxification (GO:0098754);; molecular function: catalytic activity (GO:0003824);; molecular function: antioxidant activity (GO:0016209);; molecular function:…
	SOD	Nicotiana_benthamiana_newGene_18342	--	5.98574	4.42224	5.92231	3.73045	3.92062	4.36459	7.8892	6.68237	7.00263	6.45292	6.98243	6.11921	0.694751	0.140768	normal	1.25e-05	0.866427	up	0.420239	-0.276447	normal	4.62e-10	-1.10075	down	0.415812	-0.187983	normal	--	--	Molecular Function: superoxide dismutase activity (GO:0004784);; Molecular Function: copper ion binding (GO:0005507);; Cellular Component: nucleus (GO:0005634);; Cellular Component: cytosol (GO:0005829);; Molecular Function: zinc ion binding (GO:0008270);; Biological Process: removal of superoxide radicals (GO:0019430);; Biological Process: oxidation-reduction process (GO:0055114);;	K04565|1.56781e-13|spen:107007989|K04565 superoxide dismutase, Cu-Zn family [EC:1.15.1.1] | (RefSeq) superoxide dismutase [Cu-Zn] 2	Peroxisome (ko04146)	[P]	Inorganic ion transport and metabolism	--	Superoxide dismutase [Cu-Zn] OS=Nicotiana plumbaginifolia OX=4092 GN=SODCC PE=2 SV=2	P	Inorganic ion transport and metabolism	copper/zinc superoxide dismutase, partial [Nicotiana tabacum]	biological process: metabolic process (GO:0008152);; biological process: cellular process (GO:0009987);; biological process: single-organism process (GO:0044699);; biological process: response to stimulus (GO:0050896);; biological process: detoxification (GO:0098754);; molecular function: catalytic activity (GO:0003824);; molecular function: antioxidant activity (GO:0016209);; molecular function:…
	POD	Niben101Ctg12033g00001	Niben101Ctg12033g00001	20.5134	8.46164	3.74735	14.3595	4.36674	7.5501	67.8906	69.168	27.0545	48.0146	4.75288	7.02289	0.0487012	0.868024	up	6.77e-07	1.9166	up	0.826871	-0.0945692	normal	0.290182	-0.713356	normal	0.56819	0.317051	normal	[O]	Posttranslational modification, protein turnover, chaperones	Molecular Function: peroxidase activity (GO:0004601);; Cellular Component: extracellular region (GO:0005576);; Biological Process: response to oxidative stress (GO:0006979);; Molecular Function: heme binding (GO:0020037);; Biological Process: hydrogen peroxide catabolic process (GO:0042744);; Molecular Function: metal ion binding (GO:0046872);; Molecular Function: peroxiredoxin activity (GO:00519…	--	--	[O]	Posttranslational modification, protein turnover, chaperones	Redoxin;; AhpC/TSA family	Peroxiredoxin-2B OS=Arabidopsis thaliana OX=3702 GN=PRXIIB PE=1 SV=1	O	Posttranslational modification, protein turnover, chaperones	PREDICTED: peroxiredoxin-2B-like [Nicotiana tabacum]	biological process: metabolic process (GO:0008152);; biological process: cellular process (GO:0009987);; biological process: single-organism process (GO:0044699);; biological process: response to stimulus (GO:0050896);; biological process: detoxification (GO:0098754);; molecular function: catalytic activity (GO:0003824);; molecular function: antioxidant activity (GO:0016209);; cellular component:…
	POD	Niben101Scf00709g02007	Niben101Scf00709g02007	2.42253	1.42872	1.71276	1.76321	0.774641	1.20223	2.49582	2.19591	3.40524	1.37221	3.45456	2.32786	0.57553	0.246548	normal	0.0201204	0.935851	up	0.627991	-0.260819	normal	0.00385997	-1.14869	down	0.799469	-0.125298	normal	--	--	Molecular Function: peroxidase activity (GO:0004601);; Cellular Component: extracellular region (GO:0005576);; Biological Process: response to oxidative stress (GO:0006979);; Molecular Function: heme binding (GO:0020037);; Biological Process: hydrogen peroxide catabolic process (GO:0042744);; Molecular Function: metal ion binding (GO:0046872);; Biological Process: oxidation-reduction process (GO:…	K00430|0|sly:101257228|K00430 peroxidase [EC:1.11.1.7] | (RefSeq) peroxidase 51	Phenylpropanoid biosynthesis (ko00940)	--	--	Peroxidase	Peroxidase 51 OS=Arabidopsis thaliana OX=3702 GN=PER51 PE=2 SV=1	G	Carbohydrate transport and metabolism	PREDICTED: peroxidase 51-like [Nicotiana attenuata]	biological process: metabolic process (GO:0008152);; biological process: cellular process (GO:0009987);; biological process: single-organism process (GO:0044699);; biological process: response to stimulus (GO:0050896);; biological process: detoxification (GO:0098754);; molecular function: catalytic activity (GO:0003824);; molecular function: antioxidant activity (GO:0016209);; cellular component:…
	POD	Niben101Scf00751g00001	Niben101Scf00751g00001	4.71757	6.03113	3.33482	8.96849	8.84105	7.79733	2.38579	3.71872	4.22795	3.22181	3.72393	4.21347	0.092982	-0.574608	normal	4.54e-05	-1.10946	down	0.75807	0.180886	normal	0.00113267	0.735997	up	0.228622	-0.398901	normal	--	--	Molecular Function: peroxidase activity (GO:0004601);; Cellular Component: extracellular region (GO:0005576);; Biological Process: response to oxidative stress (GO:0006979);; Cellular Component: integral component of membrane (GO:0016021);; Molecular Function: heme binding (GO:0020037);; Biological Process: hydrogen peroxide catabolic process (GO:0042744);; Molecular Function: metal ion binding (…	K00430|2.98447e-179|sly:101263035|K00430 peroxidase [EC:1.11.1.7] | (RefSeq) peroxidase 47	Phenylpropanoid biosynthesis (ko00940)	--	--	Peroxidase	Peroxidase 47 OS=Arabidopsis thaliana OX=3702 GN=PER47 PE=2 SV=2	G	Carbohydrate transport and metabolism	PREDICTED: peroxidase 47 [Nicotiana attenuata]	biological process: metabolic process (GO:0008152);; biological process: cellular process (GO:0009987);; biological process: single-organism process (GO:0044699);; biological process: response to stimulus (GO:0050896);; biological process: detoxification (GO:0098754);; molecular function: catalytic activity (GO:0003824);; molecular function: antioxidant activity (GO:0016209);; cellular component:…
	POD	Niben101Scf01372g00003	Niben101Scf01372g00003	229.566	252.564	258.343	208.25	174.806	139.237	123.202	172.83	184.87	307.715	257.207	268.618	9.69e-06	-0.81761	down	0.925562	-0.0521951	normal	0.41682	-0.227095	normal	1.01e-06	-1.06099	down	6.27e-09	-1.07672	down	[V]	Defense mechanisms	Molecular Function: peroxidase activity (GO:0004601);; Biological Process: hydrogen peroxide catabolic process (GO:0042744);; Molecular Function: peroxiredoxin activity (GO:0051920);; Biological Process: oxidation-reduction process (GO:0055114);; Biological Process: cellular oxidant detoxification (GO:0098869);;	K03386|6.11469e-145|sot:102583732|K03386 peroxiredoxin (alkyl hydroperoxide reductase subunit C) [EC:1.11.1.15] | (RefSeq) 2-Cys peroxiredoxin BAS1, chloroplastic	--	[O]	Posttranslational modification, protein turnover, chaperones	AhpC/TSA family;; Redoxin;; C-terminal domain of 1-Cys peroxiredoxin	2-Cys peroxiredoxin BAS1-like, chloroplastic OS=Arabidopsis thaliana OX=3702 GN=At5g06290 PE=2 SV=3	O	Posttranslational modification, protein turnover, chaperones	PREDICTED: 2-Cys peroxiredoxin BAS1, chloroplastic-like [Nicotiana attenuata]	biological process: metabolic process (GO:0008152);; biological process: cellular process (GO:0009987);; biological process: single-organism process (GO:0044699);; biological process: response to stimulus (GO:0050896);; biological process: detoxification (GO:0098754);; molecular function: catalytic activity (GO:0003824);; molecular function: antioxidant activity (GO:0016209)
	POD	Niben101Scf01453g06003	Niben101Scf01453g06003	0.569386	1.07269	0.894307	2.22953	3.22584	1.64496	0.418395	0.964805	1.3388	0.769028	0.843991	0.68147	0.887263	-0.102564	normal	0.0214851	-0.992705	down	0.970331	0.0381103	normal	0.000484274	1.08702	up	0.908482	-0.0732722	normal	--	--	Molecular Function: peroxidase activity (GO:0004601);; Cellular Component: extracellular region (GO:0005576);; Biological Process: response to oxidative stress (GO:0006979);; Cellular Component: plant-type cell wall (GO:0009505);; Biological Process: plant-type cell wall organization (GO:0009664);; Molecular Function: heme binding (GO:0020037);; Biological Process: hydrogen peroxide catabolic pro…	K00430|0|sot:102586327|K00430 peroxidase [EC:1.11.1.7] | (RefSeq) peroxidase 12-like	Phenylpropanoid biosynthesis (ko00940)	--	--	Peroxidase	Peroxidase 12 OS=Arabidopsis thaliana OX=3702 GN=PER12 PE=1 SV=1	G	Carbohydrate transport and metabolism	Cationic peroxidase SPC4 [Ananas comosus]	biological process: metabolic process (GO:0008152);; biological process: cellular process (GO:0009987);; biological process: single-organism process (GO:0044699);; biological process: response to stimulus (GO:0050896);; biological process: detoxification (GO:0098754);; molecular function: catalytic activity (GO:0003824);; molecular function: antioxidant activity (GO:0016209);; cellular component:…
	POD	Niben101Scf01721g07003	Niben101Scf01721g07003	0.868931	0.955371	0.41067	2.28221	3.25501	1.73631	0.596254	0.60638	1.20104	0.459478	0.682188	0.248876	0.930124	-0.0692107	normal	0.0047885	-1.1451	down	--	--	--	3.47e-05	1.64721	up	--	--	--	--	--	Molecular Function: peroxidase activity (GO:0004601);; Molecular Function: binding (GO:0005488);; Biological Process: metabolic process (GO:0008152);; Cellular Component: plant-type cell wall (GO:0009505);; Biological Process: plant-type cell wall organization (GO:0009664);; Biological Process: response to stimulus (GO:0050896);;	K00430|6.14183e-131|sly:101254073|K00430 peroxidase [EC:1.11.1.7] | (RefSeq) peroxidase 18	Phenylpropanoid biosynthesis (ko00940)	--	--	Peroxidase	Peroxidase 46 OS=Arabidopsis thaliana OX=3702 GN=PER46 PE=3 SV=1	G	Carbohydrate transport and metabolism	PREDICTED: peroxidase 46-like [Nicotiana sylvestris]	biological process: metabolic process (GO:0008152);; biological process: cellular process (GO:0009987);; biological process: single-organism process (GO:0044699);; biological process: response to stimulus (GO:0050896);; biological process: detoxification (GO:0098754);; molecular function: catalytic activity (GO:0003824);; molecular function: antioxidant activity (GO:0016209);; molecular function:…
	POD	Niben101Scf01759g04008	Niben101Scf01759g04008	2.83749	3.08872	5.68152	4.16373	3.41154	1.76169	1.33163	2.33754	1.97267	5.56794	5.12973	4.72538	0.0126646	-0.935925	down	0.403826	-0.478643	normal	0.559932	-0.291451	normal	0.00563521	-1.02606	down	7.39e-08	-1.51816	down	[V]	Defense mechanisms	Molecular Function: peroxidase activity (GO:0004601);; Molecular Function: peroxiredoxin activity (GO:0051920);; Biological Process: oxidation-reduction process (GO:0055114);; Biological Process: cellular oxidant detoxification (GO:0098869);;	K03386|1.65482e-56|sot:102583123|K03386 peroxiredoxin (alkyl hydroperoxide reductase subunit C) [EC:1.11.1.15] | (RefSeq) 2-Cys peroxiredoxin BAS1, chloroplastic	--	[O]	Posttranslational modification, protein turnover, chaperones	AhpC/TSA family;; Redoxin	2-Cys peroxiredoxin BAS1-like, chloroplastic OS=Arabidopsis thaliana OX=3702 GN=At5g06290 PE=2 SV=3	O	Posttranslational modification, protein turnover, chaperones	2-Cys peroxiredoxin, partial [Nicotiana benthamiana]	biological process: metabolic process (GO:0008152);; biological process: cellular process (GO:0009987);; biological process: single-organism process (GO:0044699);; biological process: response to stimulus (GO:0050896);; biological process: detoxification (GO:0098754);; molecular function: catalytic activity (GO:0003824);; molecular function: antioxidant activity (GO:0016209)
	POD	Niben101Scf02252g01014	Niben101Scf02252g01014	0.698395	0.291507	0.485934	0.53598	0.456705	1.07986	1.46907	0.950045	1.64779	0	0.488254	0.093179	0.0677967	0.778504	normal	0.170236	0.720559	normal	--	--	--	--	--	--	0.00601818	1.20442	up	--	--	Molecular Function: peroxidase activity (GO:0004601);; Cellular Component: extracellular region (GO:0005576);; Biological Process: response to oxidative stress (GO:0006979);; Cellular Component: plant-type cell wall (GO:0009505);; Biological Process: plant-type cell wall organization (GO:0009664);; Molecular Function: heme binding (GO:0020037);; Biological Process: hydrogen peroxide catabolic pro…	K00430|9.45825e-160|sly:101247248|K00430 peroxidase [EC:1.11.1.7] | (RefSeq) peroxidase 57-like	Phenylpropanoid biosynthesis (ko00940)	--	--	Peroxidase	Peroxidase 60 OS=Arabidopsis thaliana OX=3702 GN=PER60 PE=1 SV=1	G	Carbohydrate transport and metabolism	PREDICTED: peroxidase 60-like [Nicotiana attenuata]	biological process: metabolic process (GO:0008152);; biological process: cellular process (GO:0009987);; biological process: single-organism process (GO:0044699);; biological process: response to stimulus (GO:0050896);; biological process: detoxification (GO:0098754);; molecular function: catalytic activity (GO:0003824);; molecular function: antioxidant activity (GO:0016209);; cellular component:…
	POD	Niben101Scf03460g04004	Niben101Scf03460g04004	5.15658	3.791	24.3825	1.88605	2.16143	2.14331	16.4642	22.2974	6.53828	6.1345	18.9855	11.0482	0.945733	0.0530478	normal	1.4e-11	2.28521	up	0.980781	-0.0201006	normal	2.37e-17	-2.65428	down	0.986598	0.0140316	normal	--	--	Molecular Function: peroxidase activity (GO:0004601);; Cellular Component: extracellular region (GO:0005576);; Biological Process: response to oxidative stress (GO:0006979);; Molecular Function: heme binding (GO:0020037);; Biological Process: hydrogen peroxide catabolic process (GO:0042744);; Molecular Function: metal ion binding (GO:0046872);; Biological Process: oxidation-reduction process (GO:…	K00430|0|sly:544084|K00430 peroxidase [EC:1.11.1.7] | (RefSeq) CEVI-1; peroxidase	Phenylpropanoid biosynthesis (ko00940)	--	--	Peroxidase	Lignin-forming anionic peroxidase OS=Nicotiana tabacum OX=4097 PE=2 SV=1	G	Carbohydrate transport and metabolism	PREDICTED: lignin-forming anionic peroxidase 木质素形成阴离子过氧化物酶[Nicotiana tomentosiformis]	biological process: metabolic process (GO:0008152);; biological process: cellular process (GO:0009987);; biological process: single-organism process (GO:0044699);; biological process: response to stimulus (GO:0050896);; biological process: detoxification (GO:0098754);; molecular function: catalytic activity (GO:0003824);; molecular function: antioxidant activity (GO:0016209);; cellular component:…
	POD	Niben101Scf03990g00010	Niben101Scf03990g00010	15.6873	14.0668	44.2651	4.81856	6.0201	3.73668	14.206	7.69053	42.8201	18.6501	111.835	32.6145	0.806429	-0.173766	normal	0.0382193	1.08127	up	0.681647	-0.17734	normal	4.81e-06	-2.42829	down	0.252489	-0.574143	normal	--	--	Molecular Function: peroxidase activity (GO:0004601);; Cellular Component: extracellular region (GO:0005576);; Cellular Component: cytosol (GO:0005829);; Biological Process: response to oxidative stress (GO:0006979);; Cellular Component: plant-type cell wall (GO:0009505);; Biological Process: plant-type cell wall organization (GO:0009664);; Molecular Function: heme binding (GO:0020037);; Biologic…	K00430|0|sot:107063518|K00430 peroxidase [EC:1.11.1.7] | (RefSeq) peroxidase 21	Phenylpropanoid biosynthesis (ko00940)	--	--	Peroxidase	Peroxidase 21 OS=Arabidopsis thaliana OX=3702 GN=PER21 PE=1 SV=1	G	Carbohydrate transport and metabolism	PREDICTED: peroxidase 21 [Nicotiana sylvestris]	biological process: metabolic process (GO:0008152);; biological process: cellular process (GO:0009987);; biological process: single-organism process (GO:0044699);; biological process: response to stimulus (GO:0050896);; biological process: detoxification (GO:0098754);; molecular function: catalytic activity (GO:0003824);; molecular function: antioxidant activity (GO:0016209);; cellular component:…
	POD	Niben101Scf05649g01008	Niben101Scf05649g01008	3.11542	4.0458	1.78086	7.77129	8.57731	5.97602	2.00309	2.86043	4.00071	2.51319	3.10886	2.65099	0.738275	-0.194135	normal	0.000680463	-1.08337	down	0.988715	0.0181472	normal	0.000132134	0.946225	up	0.634732	-0.205033	normal	--	--	Molecular Function: peroxidase activity (GO:0004601);; Cellular Component: extracellular region (GO:0005576);; Biological Process: response to oxidative stress (GO:0006979);; Cellular Component: integral component of membrane (GO:0016021);; Molecular Function: heme binding (GO:0020037);; Biological Process: hydrogen peroxide catabolic process (GO:0042744);; Molecular Function: metal ion binding (…	K00430|5.76096e-105|sly:101263035|K00430 peroxidase [EC:1.11.1.7] | (RefSeq) peroxidase 47	Phenylpropanoid biosynthesis (ko00940)	--	--	Peroxidase	Peroxidase 47 OS=Arabidopsis thaliana OX=3702 GN=PER47 PE=2 SV=2	G	Carbohydrate transport and metabolism	PREDICTED: peroxidase 47 [Nicotiana sylvestris]	biological process: metabolic process (GO:0008152);; biological process: cellular process (GO:0009987);; biological process: single-organism process (GO:0044699);; biological process: response to stimulus (GO:0050896);; biological process: detoxification (GO:0098754);; molecular function: catalytic activity (GO:0003824);; molecular function: antioxidant activity (GO:0016209);; cellular component:…
	POD	Niben101Scf05682g00011	Niben101Scf05682g00011	58.811	64.9941	65.454	50.5377	42.2245	30.8772	37.2704	43.0993	46.1223	73.9645	60.3997	61.9724	4.4e-08	-0.796901	down	0.858466	0.0876251	normal	0.778656	-0.12116	normal	1.08e-05	-1.04567	down	1.55e-08	-0.938949	down	[O]	Posttranslational modification, protein turnover, chaperones	Molecular Function: peroxidase activity (GO:0004601);; Molecular Function: peroxiredoxin activity (GO:0051920);; Biological Process: oxidation-reduction process (GO:0055114);; Biological Process: cellular oxidant detoxification (GO:0098869);;	K03564|7.41628e-122|sot:102589036|K03564 peroxiredoxin Q/BCP [EC:1.11.1.15] | (RefSeq) peroxiredoxin Q, chloroplastic	--	[O]	Posttranslational modification, protein turnover, chaperones	AhpC/TSA family;; Redoxin	Peroxiredoxin Q, chloroplastic OS=Populus jackii OX=640484 GN=PRXQ PE=1 SV=1	O	Posttranslational modification, protein turnover, chaperones	PREDICTED: peroxiredoxin Q, chloroplastic-like [Nicotiana attenuata]	biological process: metabolic process (GO:0008152);; biological process: cellular process (GO:0009987);; biological process: single-organism process (GO:0044699);; biological process: response to stimulus (GO:0050896);; biological process: detoxification (GO:0098754);; molecular function: catalytic activity (GO:0003824);; molecular function: antioxidant activity (GO:0016209)
	POD	Niben101Scf06385g02016	Niben101Scf06385g02016	87.3202	89.5101	103.683	56.4513	42.6292	31.9299	50.6311	63.6028	57.4153	100.287	91.9725	91.4194	2.12e-08	-0.909134	down	0.253881	0.406979	normal	0.858855	-0.0853347	normal	8.96e-10	-1.4605	down	1.17e-11	-1.02785	down	[O]	Posttranslational modification, protein turnover, chaperones	Molecular Function: peroxidase activity (GO:0004601);; Molecular Function: peroxiredoxin activity (GO:0051920);; Biological Process: oxidation-reduction process (GO:0055114);; Biological Process: cellular oxidant detoxification (GO:0098869);;	K03564|2.87511e-126|sot:102589036|K03564 peroxiredoxin Q/BCP [EC:1.11.1.15] | (RefSeq) peroxiredoxin Q, chloroplastic	--	[O]	Posttranslational modification, protein turnover, chaperones	AhpC/TSA family;; Redoxin	Peroxiredoxin Q, chloroplastic OS=Populus jackii OX=640484 GN=PRXQ PE=1 SV=1	O	Posttranslational modification, protein turnover, chaperones	PREDICTED: peroxiredoxin Q, chloroplastic-like [Nicotiana attenuata]	biological process: metabolic process (GO:0008152);; biological process: cellular process (GO:0009987);; biological process: single-organism process (GO:0044699);; biological process: response to stimulus (GO:0050896);; biological process: detoxification (GO:0098754);; molecular function: catalytic activity (GO:0003824);; molecular function: antioxidant activity (GO:0016209)
	POD	Niben101Scf06602g00001	Niben101Scf06602g00001	0.280228	1.22568	0.301848	1.99284	4.21324	2.43651	0.07826	0.126618	0.611933	0.160395	0.431135	0.231352	--	--	--	3.63e-06	-1.94823	down	--	--	--	6.5e-10	2.42557	up	--	--	--	--	--	Molecular Function: peroxidase activity (GO:0004601);; Cellular Component: extracellular region (GO:0005576);; Biological Process: response to oxidative stress (GO:0006979);; Cellular Component: plant-type cell wall (GO:0009505);; Biological Process: plant-type cell wall organization (GO:0009664);; Molecular Function: heme binding (GO:0020037);; Biological Process: hydrogen peroxide catabolic pro…	K00430|1.02199e-172|spen:107024251|K00430 peroxidase [EC:1.11.1.7] | (RefSeq) peroxidase 3-like	Phenylpropanoid biosynthesis (ko00940)	--	--	Peroxidase	Peroxidase 3 OS=Arabidopsis thaliana OX=3702 GN=PER3 PE=2 SV=1	G	Carbohydrate transport and metabolism	PREDICTED: peroxidase 3-like [Nicotiana attenuata]	biological process: metabolic process (GO:0008152);; biological process: cellular process (GO:0009987);; biological process: single-organism process (GO:0044699);; biological process: response to stimulus (GO:0050896);; biological process: detoxification (GO:0098754);; molecular function: catalytic activity (GO:0003824);; molecular function: antioxidant activity (GO:0016209);; cellular component:…
	POD	Niben101Scf06778g07006	Niben101Scf06778g07006	3.83908	4.21613	6.72287	3.44586	5.89712	3.36574	2.25103	3.11909	2.73794	5.73678	5.12033	7.56417	0.00104683	-0.948227	down	0.20961	-0.493149	normal	0.547842	-0.277144	normal	0.00148164	-0.923043	down	3.15e-09	-1.38236	down	--	--	Molecular Function: peroxidase activity (GO:0004601);; Cellular Component: extracellular region (GO:0005576);; Biological Process: response to oxidative stress (GO:0006979);; Molecular Function: heme binding (GO:0020037);; Biological Process: hydrogen peroxide catabolic process (GO:0042744);; Molecular Function: metal ion binding (GO:0046872);; Biological Process: oxidation-reduction process (GO:…	K00430|0|sot:102594915|K00430 peroxidase [EC:1.11.1.7] | (RefSeq) peroxidase 45-like	Phenylpropanoid biosynthesis (ko00940)	--	--	Peroxidase	Peroxidase 51 OS=Arabidopsis thaliana OX=3702 GN=PER51 PE=2 SV=1	--	--	PREDICTED: peroxidase 16-like [Nicotiana tabacum]	biological process: metabolic process (GO:0008152);; biological process: cellular process (GO:0009987);; biological process: single-organism process (GO:0044699);; biological process: response to stimulus (GO:0050896);; biological process: detoxification (GO:0098754);; molecular function: catalytic activity (GO:0003824);; molecular function: antioxidant activity (GO:0016209);; cellular component:…
	POD	Niben101Scf08020g01012	Niben101Scf08020g01012	246.628	284.312	277.278	237.412	192.704	154.802	182.371	201.503	225.01	316.311	288.173	293.994	2.54e-05	-0.632048	down	0.797432	0.111214	normal	0.417978	-0.212534	normal	2.84e-06	-1.00561	down	1.1e-09	-0.877186	down	[V]	Defense mechanisms	Molecular Function: peroxidase activity (GO:0004601);; Biological Process: hydrogen peroxide catabolic process (GO:0042744);; Molecular Function: peroxiredoxin activity (GO:0051920);; Biological Process: oxidation-reduction process (GO:0055114);; Biological Process: cellular oxidant detoxification (GO:0098869);;	K03386|3.19368e-170|sot:102583123|K03386 peroxiredoxin (alkyl hydroperoxide reductase subunit C) [EC:1.11.1.15] | (RefSeq) 2-Cys peroxiredoxin BAS1, chloroplastic	--	[O]	Posttranslational modification, protein turnover, chaperones	AhpC/TSA family;; Redoxin;; C-terminal domain of 1-Cys peroxiredoxin	2-Cys peroxiredoxin BAS1-like, chloroplastic OS=Arabidopsis thaliana OX=3702 GN=At5g06290 PE=2 SV=3	O	Posttranslational modification, protein turnover, chaperones	PREDICTED: 2-Cys peroxiredoxin BAS1, chloroplastic [Nicotiana sylvestris]	biological process: metabolic process (GO:0008152);; biological process: cellular process (GO:0009987);; biological process: single-organism process (GO:0044699);; biological process: response to stimulus (GO:0050896);; biological process: detoxification (GO:0098754);; molecular function: catalytic activity (GO:0003824);; molecular function: antioxidant activity (GO:0016209)
	POD	Niben101Scf08338g00001	Niben101Scf08338g00001	4.49923	5.84692	4.92753	8.08098	10.8234	8.40257	2.84749	2.57562	4.70328	3.6231	4.54583	2.24189	0.00971862	-0.731191	down	8.16e-06	-1.20775	down	0.359129	0.352664	normal	0.000570747	0.907073	up	0.411595	-0.31978	normal	--	--	Molecular Function: peroxidase activity (GO:0004601);; Cellular Component: extracellular region (GO:0005576);; Biological Process: response to oxidative stress (GO:0006979);; Cellular Component: plant-type cell wall (GO:0009505);; Biological Process: plant-type cell wall organization (GO:0009664);; Molecular Function: heme binding (GO:0020037);; Biological Process: hydrogen peroxide catabolic pro…	K00430|0|sly:101253648|K00430 peroxidase [EC:1.11.1.7] | (RefSeq) peroxidase 42	Phenylpropanoid biosynthesis (ko00940)	--	--	Peroxidase	Peroxidase 42 OS=Arabidopsis thaliana OX=3702 GN=PER42 PE=1 SV=2	G	Carbohydrate transport and metabolism	PREDICTED: peroxidase 42 [Nicotiana tomentosiformis]	biological process: metabolic process (GO:0008152);; biological process: cellular process (GO:0009987);; biological process: single-organism process (GO:0044699);; biological process: response to stimulus (GO:0050896);; biological process: detoxification (GO:0098754);; molecular function: catalytic activity (GO:0003824);; molecular function: antioxidant activity (GO:0016209);; cellular component:…
	POD	Niben101Scf08670g00028	Niben101Scf08670g00028	0.858579	1.75432	0.772488	1.12342	1.0412	0.744437	0.37321	0.81418	1.27631	2.74925	2.67137	3.53045	0.389235	-0.449673	normal	0.892291	-0.117543	normal	0.000604213	-0.899424	down	2.57e-11	-1.90087	down	3.64e-08	-1.74924	down	--	--	Molecular Function: peroxidase activity (GO:0004601);; Cellular Component: extracellular region (GO:0005576);; Biological Process: response to oxidative stress (GO:0006979);; Cellular Component: plant-type cell wall (GO:0009505);; Biological Process: plant-type cell wall organization (GO:0009664);; Cellular Component: integral component of membrane (GO:0016021);; Molecular Function: heme binding …	K00430|0|sot:102581969|K00430 peroxidase [EC:1.11.1.7] | (RefSeq) peroxidase 19	Phenylpropanoid biosynthesis (ko00940)	--	--	Peroxidase	Peroxidase 19 OS=Arabidopsis thaliana OX=3702 GN=PER19 PE=2 SV=1	G	Carbohydrate transport and metabolism	PREDICTED: peroxidase 19 [Nicotiana attenuata]	biological process: metabolic process (GO:0008152);; biological process: cellular process (GO:0009987);; biological process: single-organism process (GO:0044699);; biological process: response to stimulus (GO:0050896);; biological process: detoxification (GO:0098754);; molecular function: catalytic activity (GO:0003824);; molecular function: antioxidant activity (GO:0016209);; cellular component:…
	POD	Niben101Scf13916g00008	Niben101Scf13916g00008	16.5623	11.9107	16.0026	10.3799	6.65156	6.98764	14.7246	13.5709	10.0215	21.3431	18.5133	25.7541	0.117307	-0.420712	normal	0.051807	0.651713	normal	0.0267081	-0.529579	normal	3.08e-12	-1.76559	down	9.11e-07	-1.03979	down	--	--	Molecular Function: peroxidase activity (GO:0004601);; Cellular Component: extracellular region (GO:0005576);; Biological Process: response to oxidative stress (GO:0006979);; Cellular Component: plant-type cell wall (GO:0009505);; Biological Process: plant-type cell wall organization (GO:0009664);; Molecular Function: heme binding (GO:0020037);; Biological Process: hydrogen peroxide catabolic pro…	K00430|0|sot:102599553|K00430 peroxidase [EC:1.11.1.7] | (RefSeq) peroxidase 43-like	Phenylpropanoid biosynthesis (ko00940)	--	--	Peroxidase	Peroxidase 43 OS=Arabidopsis thaliana OX=3702 GN=PER43 PE=3 SV=2	G	Carbohydrate transport and metabolism	PREDICTED: peroxidase 43-like [Nicotiana attenuata]	biological process: metabolic process (GO:0008152);; biological process: cellular process (GO:0009987);; biological process: single-organism process (GO:0044699);; biological process: response to stimulus (GO:0050896);; biological process: detoxification (GO:0098754);; molecular function: catalytic activity (GO:0003824);; molecular function: antioxidant activity (GO:0016209);; cellular component:…
	CAT	Niben101Ctg10591g00003	Niben101Ctg10591g00003	246.516	207.675	293.858	101.037	71.7508	85.6153	299.774	199.522	168.602	401.55	322.299	400.006	0.240964	-0.368839	normal	1.78e-06	1.28029	up	0.0085162	-0.565262	normal	1.37e-31	-2.44464	down	8.61e-06	-1.00722	down	[P]	Inorganic ion transport and metabolism	Biological Process: amino acid transmembrane transport (GO:0003333);; Molecular Function: catalase activity (GO:0004096);; Cellular Component: peroxisome (GO:0005777);; Molecular Function: amino acid transmembrane transporter activity (GO:0015171);; Cellular Component: integral component of membrane (GO:0016021);; Molecular Function: heme binding (GO:0020037);; Biological Process: response to hyd…	K03781|1.23544e-133|sot:102577720|K03781 catalase [EC:1.11.1.6] | (RefSeq) catalase isozyme 2	Tryptophan metabolism (ko00380);; Glyoxylate and dicarboxylate metabolism (ko00630);; Carbon metabolism (ko01200);; Peroxisome (ko04146)	[P]	Inorganic ion transport and metabolism	Catalase	Catalase isozyme 1 (Fragment) OS=Nicotiana plumbaginifolia OX=4092 GN=CAT1 PE=2 SV=1	P	Inorganic ion transport and metabolism	PREDICTED: catalase isozyme 1 [Nicotiana sylvestris]	biological process: single-organism process (GO:0044699);; biological process: localization (GO:0051179);; biological process: metabolic process (GO:0008152);; biological process: cellular process (GO:0009987);; biological process: response to stimulus (GO:0050896);; biological process: detoxification (GO:0098754);; molecular function: catalytic activity (GO:0003824);; molecular function: antioxi…
	CAT	Niben101Scf01497g03008	Niben101Scf01497g03008	343.306	277.225	335.522	205.033	148.271	221.069	431.742	322.543	264.533	411.138	370.061	403.605	0.696429	-0.142165	normal	0.00482836	0.808178	up	0.0949334	-0.351378	normal	5.53e-12	-1.41912	down	0.0168761	-0.527185	normal	[P]	Inorganic ion transport and metabolism	Biological Process: amino acid transmembrane transport (GO:0003333);; Molecular Function: catalase activity (GO:0004096);; Cellular Component: peroxisome (GO:0005777);; Molecular Function: amino acid transmembrane transporter activity (GO:0015171);; Cellular Component: integral component of membrane (GO:0016021);; Molecular Function: heme binding (GO:0020037);; Biological Process: response to hyd…	K03781|0|spen:107010222|K03781 catalase [EC:1.11.1.6] | (RefSeq) catalase isozyme 2	Tryptophan metabolism (ko00380);; Glyoxylate and dicarboxylate metabolism (ko00630);; Carbon metabolism (ko01200);; Peroxisome (ko04146)	[P]	Inorganic ion transport and metabolism	Catalase;; Catalase-related immune-responsive	Catalase isozyme 1 (Fragment) OS=Nicotiana plumbaginifolia OX=4092 GN=CAT1 PE=2 SV=1	P	Inorganic ion transport and metabolism	catalase [Nicotiana benthamiana]	biological process: single-organism process (GO:0044699);; biological process: localization (GO:0051179);; biological process: metabolic process (GO:0008152);; biological process: cellular process (GO:0009987);; biological process: response to stimulus (GO:0050896);; biological process: detoxification (GO:0098754);; molecular function: catalytic activity (GO:0003824);; molecular function: antioxi…
	CAT	Niben101Scf02041g04015	Niben101Scf02041g04015	282.669	236.827	322.549	129.811	90.6497	113.378	325.392	224.781	179.414	400.096	341.312	420.698	0.16944	-0.408287	normal	0.000157271	1.06413	up	0.0291289	-0.47098	normal	5.26e-25	-2.13894	down	3.27e-05	-0.935731	down	[P]	Inorganic ion transport and metabolism	Biological Process: amino acid transmembrane transport (GO:0003333);; Molecular Function: catalase activity (GO:0004096);; Cellular Component: peroxisome (GO:0005777);; Molecular Function: amino acid transmembrane transporter activity (GO:0015171);; Cellular Component: integral component of membrane (GO:0016021);; Molecular Function: heme binding (GO:0020037);; Biological Process: response to hyd…	K03781|0|spen:107010222|K03781 catalase [EC:1.11.1.6] | (RefSeq) catalase isozyme 2	Tryptophan metabolism (ko00380);; Glyoxylate and dicarboxylate metabolism (ko00630);; Carbon metabolism (ko01200);; Peroxisome (ko04146)	[P]	Inorganic ion transport and metabolism	Catalase;; Catalase-related immune-responsive	Catalase isozyme 1 (Fragment) OS=Nicotiana plumbaginifolia OX=4092 GN=CAT1 PE=2 SV=1	P	Inorganic ion transport and metabolism	catalase [Nicotiana benthamiana]	biological process: single-organism process (GO:0044699);; biological process: localization (GO:0051179);; biological process: metabolic process (GO:0008152);; biological process: cellular process (GO:0009987);; biological process: response to stimulus (GO:0050896);; biological process: detoxification (GO:0098754);; molecular function: catalytic activity (GO:0003824);; molecular function: antioxi…
	CAT	Niben101Scf14996g00009	Niben101Scf14996g00009	12.4103	25.6531	11.236	32.4066	47.0532	42.6473	13.0429	20.7684	17.7005	5.52941	10.5484	11.4956	0.780237	-0.148702	normal	1.63e-06	-1.07997	down	0.561369	0.28827	normal	3.74e-11	1.62112	up	0.08543	0.509903	normal	[P]	Inorganic ion transport and metabolism	Molecular Function: catalase activity (GO:0004096);; Biological Process: response to water deprivation (GO:0009414);; Cellular Component: glyoxysome (GO:0009514);; Molecular Function: heme binding (GO:0020037);; Biological Process: response to hydrogen peroxide (GO:0042542);; Biological Process: hydrogen peroxide catabolic process (GO:0042744);; Molecular Function: metal ion binding (GO:0046872);…	K03781|0|spen:107007063|K03781 catalase [EC:1.11.1.6] | (RefSeq) catalase isozyme 1	Tryptophan metabolism (ko00380);; Glyoxylate and dicarboxylate metabolism (ko00630);; Carbon metabolism (ko01200);; Peroxisome (ko04146)	[P]	Inorganic ion transport and metabolism	Catalase;; Catalase-related immune-responsive	Catalase isozyme 1 OS=Nicotiana tabacum OX=4097 GN=CAT-1 PE=1 SV=2	P	Inorganic ion transport and metabolism	PREDICTED: catalase isozyme 1 [Nicotiana sylvestris]	biological process: metabolic process (GO:0008152);; biological process: cellular process (GO:0009987);; biological process: single-organism process (GO:0044699);; biological process: response to stimulus (GO:0050896);; biological process: detoxification (GO:0098754);; molecular function: catalytic activity (GO:0003824);; molecular function: antioxidant activity (GO:0016209);; cellular component:…
	GST	Niben101Scf00897g03002	Niben101Scf00897g03002	97.5422	76.7554	128.351	93.5402	71.9587	85.2472	177.439	151.48	178.544	101.272	232.989	125.013	0.0831176	0.447726	normal	7.97e-08	1.02362	up	0.549746	-0.302158	normal	8.38e-06	-1.18989	down	0.671318	-0.154237	normal	[O]	Posttranslational modification, protein turnover, chaperones	Molecular Function: glutathione transferase activity (GO:0004364);; Cellular Component: cytoplasm (GO:0005737);; Biological Process: glutathione metabolic process (GO:0006749);; Biological Process: toxin catabolic process (GO:0009407);;	K00799|4.78093e-132|spen:107026069|K00799 glutathione S-transferase [EC:2.5.1.18] | (RefSeq) probable glutathione S-transferase	Glutathione metabolism (ko00480)	[O]	Posttranslational modification, protein turnover, chaperones	Glutathione S-transferase, N-terminal domain;; Glutathione S-transferase, N-terminal domain;; Glutathione S-transferase, C-terminal domain;; Glutathione S-transferase, C-terminal domain;; Glutathione S-transferase, N-terminal domain	Probable glutathione S-transferase OS=Nicotiana tabacum OX=4097 PE=2 SV=1	O	Posttranslational modification, protein turnover, chaperones	PREDICTED: probable glutathione S-transferase [Nicotiana sylvestris]	molecular function: catalytic activity (GO:0003824);; cellular component: cell (GO:0005623);; cellular component: cell part (GO:0044464);; biological process: metabolic process (GO:0008152);; biological process: cellular process (GO:0009987);; biological process: single-organism process (GO:0044699);; biological process: response to stimulus (GO:0050896);; biological process: detoxification (GO:0…
	GST	Niben101Scf01799g02002	Niben101Scf01799g02002	20.7736	25.9197	22.2684	16.3395	13.0247	10.9825	19.8791	14.8681	16.1793	27.0037	20.0811	21.365	0.000602026	-0.643637	down	0.276631	0.366697	normal	0.921338	-0.0644095	normal	2.55e-06	-1.13546	down	0.000465629	-0.72726	down	[O]	Posttranslational modification, protein turnover, chaperones	Molecular Function: glutathione transferase activity (GO:0004364);; Biological Process: glutathione metabolic process (GO:0006749);; Cellular Component: chloroplast stroma (GO:0009570);; Biological Process: response to cytokinin (GO:0009735);; Cellular Component: chloroplast envelope (GO:0009941);; Biological Process: protein glutathionylation (GO:0010731);; Molecular Function: glutathione dehydr…	--	--	[P]	Inorganic ion transport and metabolism	Glutathione S-transferase, N-terminal domain;; Glutathione S-transferase, N-terminal domain;; Glutathione S-transferase, N-terminal domain	Glutathione S-transferase DHAR3, chloroplastic OS=Arabidopsis thaliana OX=3702 GN=DHAR3 PE=1 SV=1	U	Intracellular trafficking, secretion, and vesicular transport	PREDICTED: glutathione S-transferase DHAR3, chloroplastic [Nicotiana sylvestris]	molecular function: catalytic activity (GO:0003824);; biological process: metabolic process (GO:0008152);; biological process: cellular process (GO:0009987);; cellular component: cell (GO:0005623);; cellular component: organelle (GO:0043226);; cellular component: organelle part (GO:0044422);; cellular component: cell part (GO:0044464);; biological process: response to stimulus (GO:0050896);; biol…
	GST	Niben101Scf02086g01010	Niben101Scf02086g01010	9.67236	6.62802	7.34218	5.12963	5.4686	5.13467	16.0072	13.1581	14.6553	11.6729	14.5611	7.54382	0.00420675	0.59886	up	1.17e-19	1.48109	up	0.14938	-0.446551	normal	5.89e-10	-1.44955	down	0.921783	0.0409702	normal	[O]	Posttranslational modification, protein turnover, chaperones	--	K00799|1.5437e-141|spen:107029498|K00799 glutathione S-transferase [EC:2.5.1.18] | (RefSeq) glutathione S-transferase L3-like	Glutathione metabolism (ko00480)	[O]	Posttranslational modification, protein turnover, chaperones	Glutathione S-transferase, N-terminal domain;; Glutathione S-transferase, N-terminal domain;; Glutathione S-transferase, C-terminal domain;; Glutathione S-transferase, N-terminal domain;; Glutathione S-transferase, C-terminal domain;; Glutathione S-transferase, C-terminal domain	Glutathione S-transferase L3 OS=Arabidopsis thaliana OX=3702 GN=GSTL3 PE=2 SV=1	O	Posttranslational modification, protein turnover, chaperones	PREDICTED: glutathione S-transferase L3-like isoform X2 [Nicotiana sylvestris]	--
	GST	Niben101Scf02325g03024	Niben101Scf02325g03024	1.26503	0.54043	1.95662	1.2064	1.60166	1.94121	13.486	14.1298	8.22235	1.09427	4.61151	1.69267	6.78e-13	2.21851	up	2.33e-21	2.56933	up	0.387061	-0.369885	normal	0.0773554	-0.848406	normal	0.00749832	1.15811	up	[O]	Posttranslational modification, protein turnover, chaperones	Molecular Function: glutathione transferase activity (GO:0004364);; Cellular Component: cytoplasm (GO:0005737);; Biological Process: glutathione metabolic process (GO:0006749);; Biological Process: toxin catabolic process (GO:0009407);;	K00799|6.15251e-110|sly:101258000|K00799 glutathione S-transferase [EC:2.5.1.18] | (RefSeq) glutathione transferase GST 23-like	Glutathione metabolism (ko00480)	[O]	Posttranslational modification, protein turnover, chaperones	Glutathione S-transferase, N-terminal domain;; Glutathione S-transferase, N-terminal domain;; Glutathione S-transferase, N-terminal domain;; Glutathione S-transferase, C-terminal domain;; Glutathione S-transferase, C-terminal domain	Glutathione transferase GST 23 OS=Zea mays OX=4577 PE=2 SV=1	O	Posttranslational modification, protein turnover, chaperones	PREDICTED: glutathione transferase GST 23-like [Nicotiana sylvestris]	molecular function: catalytic activity (GO:0003824);; cellular component: cell (GO:0005623);; cellular component: cell part (GO:0044464);; biological process: metabolic process (GO:0008152);; biological process: cellular process (GO:0009987);; biological process: single-organism process (GO:0044699);; biological process: response to stimulus (GO:0050896);; biological process: detoxification (GO:0…
	GST	Niben101Scf03147g09006	Niben101Scf03147g09006	4.24648	2.61867	2.75829	1.3744	2.87105	1.7911	19.6386	27.2844	14.1981	5.81654	10.937	7.40139	2.84e-16	2.05918	up	6.8e-25	2.89397	up	1.44e-05	-0.984298	down	3.01e-15	-2.23969	down	0.000796756	0.902264	up	[O]	Posttranslational modification, protein turnover, chaperones	Molecular Function: glutathione transferase activity (GO:0004364);; Cellular Component: cytoplasm (GO:0005737);; Biological Process: glutathione metabolic process (GO:0006749);; Biological Process: toxin catabolic process (GO:0009407);; Biological Process: auxin-activated signaling pathway (GO:0009734);;	K00799|4.99944e-122|sot:102599649|K00799 glutathione S-transferase [EC:2.5.1.18] | (RefSeq) probable glutathione S-transferase	Glutathione metabolism (ko00480)	[O]	Posttranslational modification, protein turnover, chaperones	Glutathione S-transferase, N-terminal domain;; Glutathione S-transferase, N-terminal domain;; Glutathione S-transferase, C-terminal domain;; Glutathione S-transferase, N-terminal domain;; Glutathione S-transferase, C-terminal domain;; Glutathione S-transferase, C-terminal domain	Probable glutathione S-transferase OS=Nicotiana tabacum OX=4097 PE=2 SV=1	O	Posttranslational modification, protein turnover, chaperones	PREDICTED: probable glutathione S-transferase [Nicotiana sylvestris]	molecular function: catalytic activity (GO:0003824);; cellular component: cell (GO:0005623);; cellular component: cell part (GO:0044464);; biological process: metabolic process (GO:0008152);; biological process: cellular process (GO:0009987);; biological process: single-organism process (GO:0044699);; biological process: response to stimulus (GO:0050896);; biological process: detoxification (GO:0…
	GST	Niben101Scf03147g10010	Niben101Scf03147g10010	0.820579	0.143853	0.457525	0.04442	0.389834	0.136604	12.4987	14.5802	9.8692	0.24934	2.25808	0.921453	1.88e-30	3.32229	up	1.99e-56	4.70648	up	0.415569	-0.320294	normal	--	--	--	0.000816319	1.41679	up	[O]	Posttranslational modification, protein turnover, chaperones	Molecular Function: glutathione transferase activity (GO:0004364);; Biological Process: auxin-activated signaling pathway (GO:0009734);;	K00799|2.21377e-101|sot:102599649|K00799 glutathione S-transferase [EC:2.5.1.18] | (RefSeq) probable glutathione S-transferase	Glutathione metabolism (ko00480)	[O]	Posttranslational modification, protein turnover, chaperones	Glutathione S-transferase, N-terminal domain;; Glutathione S-transferase, N-terminal domain;; Glutathione S-transferase, C-terminal domain;; Glutathione S-transferase, N-terminal domain;; Glutathione S-transferase, C-terminal domain	Probable glutathione S-transferase OS=Nicotiana tabacum OX=4097 PE=2 SV=1	O	Posttranslational modification, protein turnover, chaperones	probable glutathione S-transferase [Nicotiana tabacum]	molecular function: catalytic activity (GO:0003824);; biological process: cellular process (GO:0009987);; biological process: signaling (GO:0023052);; biological process: single-organism process (GO:0044699);; biological process: response to stimulus (GO:0050896);; biological process: biological regulation (GO:0065007)
	GST	Niben101Scf03147g10015	Niben101Scf03147g10015	10.5418	10.7948	13.8431	9.65146	6.55364	6.05884	14.3688	14.4509	20.5279	16.1591	16.844	14.762	0.517414	0.213053	normal	0.000119417	1.0743	up	0.0450162	-0.44272	normal	6.9e-10	-1.44299	down	0.219836	-0.280291	normal	[O]	Posttranslational modification, protein turnover, chaperones	Molecular Function: glutathione transferase activity (GO:0004364);; Cellular Component: cytoplasm (GO:0005737);; Biological Process: glutathione metabolic process (GO:0006749);; Biological Process: toxin catabolic process (GO:0009407);;	K00799|6.44551e-104|spen:107030723|K00799 glutathione S-transferase [EC:2.5.1.18] | (RefSeq) probable glutathione S-transferase	Glutathione metabolism (ko00480)	[O]	Posttranslational modification, protein turnover, chaperones	Glutathione S-transferase, N-terminal domain;; Glutathione S-transferase, C-terminal domain;; Glutathione S-transferase, N-terminal domain;; Glutathione S-transferase, N-terminal domain;; Glutathione S-transferase, C-terminal domain;; Glutathione S-transferase, C-terminal domain	Probable glutathione S-transferase OS=Nicotiana tabacum OX=4097 PE=2 SV=1	O	Posttranslational modification, protein turnover, chaperones	PREDICTED: probable glutathione S-transferase [Nicotiana attenuata]	molecular function: catalytic activity (GO:0003824);; cellular component: cell (GO:0005623);; cellular component: cell part (GO:0044464);; biological process: metabolic process (GO:0008152);; biological process: cellular process (GO:0009987);; biological process: single-organism process (GO:0044699);; biological process: response to stimulus (GO:0050896);; biological process: detoxification (GO:0…
	GST	Niben101Scf03263g03004	Niben101Scf03263g03004	13.8219	9.23935	16.5562	5.57196	3.94426	5.62558	25.8131	18.0127	9.59219	19.8988	20.3823	28.176	0.812359	0.143141	normal	1.19e-05	1.51815	up	0.0156771	-0.642172	down	1.21e-23	-2.45076	down	0.0819912	-0.595183	normal	[O]	Posttranslational modification, protein turnover, chaperones	Molecular Function: glutathione transferase activity (GO:0004364);; Cellular Component: cytoplasm (GO:0005737);; Biological Process: glutathione metabolic process (GO:0006749);; Biological Process: toxin catabolic process (GO:0009407);; Molecular Function: lyase activity (GO:0016829);;	K00799|1.38579e-99|spen:107030773|K00799 glutathione S-transferase [EC:2.5.1.18] | (RefSeq) glutathione transferase GST 23-like	Glutathione metabolism (ko00480)	[O]	Posttranslational modification, protein turnover, chaperones	Glutathione S-transferase, N-terminal domain;; Glutathione S-transferase, N-terminal domain;; Glutathione S-transferase, N-terminal domain;; Glutathione S-transferase, C-terminal domain;; Glutathione S-transferase, C-terminal domain	Glutathione transferase GST 23 OS=Zea mays OX=4577 PE=2 SV=1	O	Posttranslational modification, protein turnover, chaperones	PREDICTED: glutathione transferase GST 23-like [Nicotiana sylvestris]	molecular function: catalytic activity (GO:0003824);; cellular component: cell (GO:0005623);; cellular component: cell part (GO:0044464);; biological process: metabolic process (GO:0008152);; biological process: cellular process (GO:0009987);; biological process: single-organism process (GO:0044699);; biological process: response to stimulus (GO:0050896);; biological process: detoxification (GO:0…
	GST	Niben101Scf04174g01004	Niben101Scf04174g01004	38.1006	32.1795	51.8275	31.0117	21.2284	31.1997	56.0877	36.3479	43.7112	38.2043	71.6902	47.0821	0.849684	-0.0880154	normal	0.0178101	0.698033	up	0.360717	-0.326203	normal	3.85e-07	-1.24431	down	0.0525412	-0.485956	normal	[O]	Posttranslational modification, protein turnover, chaperones	Molecular Function: transferase activity (GO:0016740);; Molecular Function: lyase activity (GO:0016829);;	K00799|7.71611e-141|aly:ARALYDRAFT_316741|K00799 glutathione S-transferase [EC:2.5.1.18] | (RefSeq) F3F9.11	Glutathione metabolism (ko00480)	[O]	Posttranslational modification, protein turnover, chaperones	Glutathione S-transferase, N-terminal domain;; Glutathione S-transferase, N-terminal domain;; Glutathione S-transferase, N-terminal domain;; Glutathione S-transferase, C-terminal domain;; Glutathione S-transferase, C-terminal domain;; Glutathione S-transferase N-terminal domain	Probable glutathione S-transferase OS=Nicotiana tabacum OX=4097 PE=2 SV=1	O	Posttranslational modification, protein turnover, chaperones	LOW QUALITY PROTEIN: GST_C domain-containing protein/GST_N domain-containing protein/GST_C_2 domain-containing protein/GST_N_3 domain-containing protein, partial [Cephalotus follicularis]	molecular function: catalytic activity (GO:0003824)
	GST	Niben101Scf04174g01008	Niben101Scf04174g01008	127.445	118.054	134.748	98.1183	77.7573	63.5017	177.518	203.17	180.689	163.686	183.649	151.435	0.0851426	0.301671	normal	4.15e-08	1.19923	up	0.00686152	-0.428609	normal	4.04e-12	-1.42186	down	0.355495	-0.162679	normal	[O]	Posttranslational modification, protein turnover, chaperones	Molecular Function: glutathione transferase activity (GO:0004364);; Molecular Function: peroxidase activity (GO:0004601);; Cellular Component: cytoplasm (GO:0005737);; Biological Process: glutathione metabolic process (GO:0006749);; Biological Process: toxin catabolic process (GO:0009407);; Biological Process: auxin-activated signaling pathway (GO:0009734);; Biological Process: cellular oxidant d…	K00799|1.0184e-133|sot:102602353|K00799 glutathione S-transferase [EC:2.5.1.18] | (RefSeq) probable glutathione S-transferase	Glutathione metabolism (ko00480)	[O]	Posttranslational modification, protein turnover, chaperones	Glutathione S-transferase, N-terminal domain;; Glutathione S-transferase, C-terminal domain;; Glutathione S-transferase, N-terminal domain;; Glutathione S-transferase, C-terminal domain;; Glutathione S-transferase, N-terminal domain	Probable glutathione S-transferase OS=Nicotiana tabacum OX=4097 PE=2 SV=1	O	Posttranslational modification, protein turnover, chaperones	probable glutathione S-transferase [Nicotiana tabacum]	molecular function: catalytic activity (GO:0003824);; biological process: metabolic process (GO:0008152);; biological process: cellular process (GO:0009987);; biological process: single-organism process (GO:0044699);; biological process: response to stimulus (GO:0050896);; biological process: detoxification (GO:0098754);; molecular function: antioxidant activity (GO:0016209);; cellular component:…
	GST	Niben101Scf04329g02003	Niben101Scf04329g02003	23.504	27.032	27.275	16.5231	11.7797	12.1916	13.0538	16.4116	14.7848	26.4189	23.652	24.3915	1.85e-10	-1.00922	down	0.660984	0.174846	normal	0.983682	-0.0156786	normal	5.88e-09	-1.25114	down	3.26e-11	-1.04965	down	[O]	Posttranslational modification, protein turnover, chaperones	Molecular Function: glutathione transferase activity (GO:0004364);; Biological Process: glutathione metabolic process (GO:0006749);; Molecular Function: electron carrier activity (GO:0009055);; Cellular Component: chloroplast thylakoid membrane (GO:0009535);; Cellular Component: chloroplast envelope (GO:0009941);; Molecular Function: protein disulfide oxidoreductase activity (GO:0015035);; Biolog…	--	--	--	--	Glutathione S-transferase, N-terminal domain;; Glutathione S-transferase, N-terminal domain	--	S	Function unknown	PREDICTED: uncharacterized protein LOC104234758 [Nicotiana sylvestris]	molecular function: catalytic activity (GO:0003824);; biological process: metabolic process (GO:0008152);; biological process: cellular process (GO:0009987);; molecular function: electron carrier activity (GO:0009055);; cellular component: cell (GO:0005623);; cellular component: membrane (GO:0016020);; cellular component: organelle (GO:0043226);; cellular component: organelle part (GO:0044422);; …
	GST	Niben101Scf05952g00002	Niben101Scf05952g00002	75.3883	67.2555	62.2796	52.8084	41.4929	40.9245	85.69	73.8971	70.5419	87.5322	67.2379	81.3677	0.796158	-0.0734914	normal	0.000372669	0.781139	up	0.385605	-0.256591	normal	4.77e-08	-1.1873	down	0.0893341	-0.368005	normal	[O]	Posttranslational modification, protein turnover, chaperones	Molecular Function: glutathione transferase activity (GO:0004364);; Cellular Component: cytoplasm (GO:0005737);; Biological Process: glutathione metabolic process (GO:0006749);;	K00799|1.66847e-148|spen:107007458|K00799 glutathione S-transferase [EC:2.5.1.18] | (RefSeq) glutathione S-transferase-like	Glutathione metabolism (ko00480)	[O]	Posttranslational modification, protein turnover, chaperones	Glutathione S-transferase, N-terminal domain;; Glutathione S-transferase, C-terminal domain;; Glutathione S-transferase, N-terminal domain;; Glutathione S-transferase, N-terminal domain;; Glutathione S-transferase, C-terminal domain;; Glutathione S-transferase, C-terminal domain	Glutathione S-transferase OS=Hyoscyamus muticus OX=35626 PE=1 SV=1	O	Posttranslational modification, protein turnover, chaperones	PREDICTED: glutathione S-transferase-like [Nicotiana sylvestris]	molecular function: catalytic activity (GO:0003824);; cellular component: cell (GO:0005623);; cellular component: cell part (GO:0044464);; biological process: metabolic process (GO:0008152);; biological process: cellular process (GO:0009987)
	GST	Niben101Scf08130g00014	Niben101Scf08130g00014	4.00929	4.48835	6.37796	8.50097	6.1514	7.00656	20.5269	16.5402	30.1972	6.83622	14.4796	2.5713	2.03e-11	1.65454	up	1.17e-08	1.5043	up	0.755708	-0.173442	normal	0.595768	-0.366294	normal	0.218784	0.63096	normal	[O]	Posttranslational modification, protein turnover, chaperones	Molecular Function: transferase activity (GO:0016740);;	K00799|1.4174e-117|spen:107031330|K00799 glutathione S-transferase [EC:2.5.1.18] | (RefSeq) probable glutathione S-transferase	Glutathione metabolism (ko00480)	[O]	Posttranslational modification, protein turnover, chaperones	Glutathione S-transferase, N-terminal domain;; Glutathione S-transferase, N-terminal domain;; Glutathione S-transferase, C-terminal domain;; Glutathione S-transferase, N-terminal domain	Probable glutathione S-transferase OS=Nicotiana tabacum OX=4097 PE=2 SV=1	O	Posttranslational modification, protein turnover, chaperones	PREDICTED: probable glutathione S-transferase [Nicotiana attenuata]	molecular function: catalytic activity (GO:0003824)
	GST	Niben101Scf08196g01001	Niben101Scf08196g01001	4.4311	4.11544	9.15845	9.34318	6.78988	6.80035	25.9308	24.6584	68.8333	9.52613	37.1022	4.29679	0.00166245	1.2647	up	7.86e-09	1.93876	up	0.538776	-0.221745	normal	0.174568	-0.875109	normal	0.540648	0.352874	normal	[O]	Posttranslational modification, protein turnover, chaperones	Molecular Function: glutathione transferase activity (GO:0004364);; Cellular Component: cytoplasm (GO:0005737);; Biological Process: glutathione metabolic process (GO:0006749);; Biological Process: toxin catabolic process (GO:0009407);; Biological Process: auxin-activated signaling pathway (GO:0009734);;	K00799|9.91004e-117|pmum:103339277|K00799 glutathione S-transferase [EC:2.5.1.18] | (RefSeq) probable glutathione S-transferase parA	Glutathione metabolism (ko00480)	[O]	Posttranslational modification, protein turnover, chaperones	Glutathione S-transferase, N-terminal domain;; Glutathione S-transferase, C-terminal domain;; Glutathione S-transferase, N-terminal domain;; Glutathione S-transferase, C-terminal domain;; Glutathione S-transferase, N-terminal domain	Probable glutathione S-transferase parA OS=Nicotiana tabacum OX=4097 GN=PARA PE=2 SV=1	O	Posttranslational modification, protein turnover, chaperones	PREDICTED: probable glutathione S-transferase parA [Nicotiana sylvestris]	molecular function: catalytic activity (GO:0003824);; cellular component: cell (GO:0005623);; cellular component: cell part (GO:0044464);; biological process: metabolic process (GO:0008152);; biological process: cellular process (GO:0009987);; biological process: single-organism process (GO:0044699);; biological process: response to stimulus (GO:0050896);; biological process: detoxification (GO:0…
	GST	Niben101Scf09470g01004	Niben101Scf09470g01004	53.2835	39.8238	37.2252	30.635	27.0562	32.6431	72.3659	60.3669	47.0512	63.8479	41.4745	36.7563	0.523054	0.205658	normal	1.15e-05	0.988211	up	0.748963	-0.170788	normal	4.47e-05	-1.03622	down	0.98077	-0.0124869	normal	[O]	Posttranslational modification, protein turnover, chaperones	Molecular Function: glutathione transferase activity (GO:0004364);; Cellular Component: cytoplasm (GO:0005737);; Biological Process: glutathione metabolic process (GO:0006749);;	K00799|2.04689e-132|sot:102599650|K00799 glutathione S-transferase [EC:2.5.1.18] | (RefSeq) glutathione S-transferase T1-like	Glutathione metabolism (ko00480)	[O]	Posttranslational modification, protein turnover, chaperones	Glutathione S-transferase, N-terminal domain;; Glutathione S-transferase, N-terminal domain;; Glutathione S-transferase, N-terminal domain;; Glutathione S-transferase, C-terminal domain	Glutathione S-transferase T1 OS=Arabidopsis thaliana OX=3702 GN=GSTT1 PE=2 SV=1	O	Posttranslational modification, protein turnover, chaperones	PREDICTED: glutathione S-transferase T1-like [Nicotiana attenuata]	molecular function: catalytic activity (GO:0003824);; cellular component: cell (GO:0005623);; cellular component: cell part (GO:0044464);; biological process: metabolic process (GO:0008152);; biological process: cellular process (GO:0009987)
	GST	Niben101Scf10205g00021	Niben101Scf10205g00021	1.10947	1.02173	0.728009	1.44019	1.86644	2.06841	0.65042	0.642303	1.42717	0.462653	0.704001	0.58904	0.758593	-0.204064	normal	0.170502	-0.678325	normal	0	--	--	0.00782662	1.02088	up	--	--	--	[O]	Posttranslational modification, protein turnover, chaperones	Molecular Function: glutathione transferase activity (GO:0004364);; Cellular Component: cytoplasm (GO:0005737);; Biological Process: glutathione metabolic process (GO:0006749);; Biological Process: toxin catabolic process (GO:0009407);;	K00799|6.40138e-120|spen:107031332|K00799 glutathione S-transferase [EC:2.5.1.18] | (RefSeq) probable glutathione S-transferase	Glutathione metabolism (ko00480)	[O]	Posttranslational modification, protein turnover, chaperones	Glutathione S-transferase, N-terminal domain;; Glutathione S-transferase, N-terminal domain;; Glutathione S-transferase, C-terminal domain;; Glutathione S-transferase, N-terminal domain	Probable glutathione S-transferase OS=Nicotiana tabacum OX=4097 PE=2 SV=1	O	Posttranslational modification, protein turnover, chaperones	PREDICTED: probable glutathione S-transferase [Nicotiana tabacum]	molecular function: catalytic activity (GO:0003824);; cellular component: cell (GO:0005623);; cellular component: cell part (GO:0044464);; biological process: metabolic process (GO:0008152);; biological process: cellular process (GO:0009987);; biological process: single-organism process (GO:0044699);; biological process: response to stimulus (GO:0050896);; biological process: detoxification (GO:0…
	GST	Niben101Scf10316g03002	Niben101Scf10316g03002	3.29479	2.87212	4.93874	3.78634	2.53897	3.75049	10.0412	6.3626	6.86151	3.3871	5.45552	3.63746	0.0234287	0.690553	up	0.00015082	1.11625	up	0.79765	-0.161634	normal	0.0215892	-0.670799	down	0.0571395	0.517095	normal	[O]	Posttranslational modification, protein turnover, chaperones	Molecular Function: transferase activity (GO:0016740);;	K00799|3.40189e-111|spen:107031330|K00799 glutathione S-transferase [EC:2.5.1.18] | (RefSeq) probable glutathione S-transferase	Glutathione metabolism (ko00480)	[O]	Posttranslational modification, protein turnover, chaperones	Glutathione S-transferase, N-terminal domain;; Glutathione S-transferase, N-terminal domain;; Glutathione S-transferase, C-terminal domain;; Glutathione S-transferase, N-terminal domain;; Glutathione S-transferase, C-terminal domain	Probable glutathione S-transferase OS=Nicotiana tabacum OX=4097 PE=2 SV=1	O	Posttranslational modification, protein turnover, chaperones	PREDICTED: probable glutathione S-transferase [Nicotiana tomentosiformis]	molecular function: catalytic activity (GO:0003824)
	GST	Niben101Scf10316g03003	Niben101Scf10316g03003	1.57032	1.03686	3.22782	2.10343	1.08178	1.79255	7.46884	3.68931	2.57642	2.95468	4.44022	2.11339	0.15277	0.647366	normal	0.0090124	1.12554	up	0.381074	-0.385382	normal	0.000996198	-1.17985	down	0.76622	0.163578	normal	[O]	Posttranslational modification, protein turnover, chaperones	Molecular Function: glutathione transferase activity (GO:0004364);; Cellular Component: cytoplasm (GO:0005737);; Biological Process: glutathione metabolic process (GO:0006749);; Biological Process: toxin catabolic process (GO:0009407);;	K00799|1.2518e-105|spen:107030723|K00799 glutathione S-transferase [EC:2.5.1.18] | (RefSeq) probable glutathione S-transferase	Glutathione metabolism (ko00480)	[O]	Posttranslational modification, protein turnover, chaperones	Glutathione S-transferase, N-terminal domain;; Glutathione S-transferase, C-terminal domain;; Glutathione S-transferase, N-terminal domain;; Glutathione S-transferase, N-terminal domain;; Glutathione S-transferase, C-terminal domain;; Glutathione S-transferase, C-terminal domain	Probable glutathione S-transferase OS=Nicotiana tabacum OX=4097 PE=2 SV=1	O	Posttranslational modification, protein turnover, chaperones	PREDICTED: probable glutathione S-transferase [Nicotiana attenuata]	molecular function: catalytic activity (GO:0003824);; cellular component: cell (GO:0005623);; cellular component: cell part (GO:0044464);; biological process: metabolic process (GO:0008152);; biological process: cellular process (GO:0009987);; biological process: single-organism process (GO:0044699);; biological process: response to stimulus (GO:0050896);; biological process: detoxification (GO:0…
	GST	Niben101Scf10316g03004	Niben101Scf10316g03004	0.317357	0.116452	0.299315	0.279523	0.119773	0	1.00065	1.63904	1.01593	0.230153	0.257981	0.091055	0.000525494	1.29959	up	0.00241056	1.44339	up	--	--	--	--	--	--	3.15e-05	1.57593	up	[O]	Posttranslational modification, protein turnover, chaperones	Molecular Function: glutathione transferase activity (GO:0004364);; Biological Process: auxin-activated signaling pathway (GO:0009734);;	K00799|6.53627e-123|sot:102599649|K00799 glutathione S-transferase [EC:2.5.1.18] | (RefSeq) probable glutathione S-transferase	Glutathione metabolism (ko00480)	[O]	Posttranslational modification, protein turnover, chaperones	Glutathione S-transferase, N-terminal domain;; Glutathione S-transferase, N-terminal domain;; Glutathione S-transferase, N-terminal domain;; Glutathione S-transferase, C-terminal domain	Probable glutathione S-transferase OS=Nicotiana tabacum OX=4097 PE=2 SV=1	O	Posttranslational modification, protein turnover, chaperones	probable glutathione S-transferase [Nicotiana tabacum]	molecular function: catalytic activity (GO:0003824);; biological process: cellular process (GO:0009987);; biological process: signaling (GO:0023052);; biological process: single-organism process (GO:0044699);; biological process: response to stimulus (GO:0050896);; biological process: biological regulation (GO:0065007)
	GST	Niben101Scf10468g00012	Niben101Scf10468g00012	50.3653	52.8128	51.1802	39.8013	32.4101	30.8032	44.1493	41.079	44.3846	59.4485	54.6395	54.5882	0.000128568	-0.485841	normal	0.133015	0.375422	normal	0.468511	-0.191933	normal	6.72e-09	-1.10388	down	4.07e-07	-0.703232	down	[O]	Posttranslational modification, protein turnover, chaperones	Molecular Function: glutathione transferase activity (GO:0004364);; Biological Process: glutathione metabolic process (GO:0006749);; Cellular Component: chloroplast stroma (GO:0009570);; Biological Process: response to cytokinin (GO:0009735);; Cellular Component: chloroplast envelope (GO:0009941);; Biological Process: protein glutathionylation (GO:0010731);; Molecular Function: glutathione dehydr…	--	--	[P]	Inorganic ion transport and metabolism	Glutathione S-transferase, N-terminal domain;; Glutathione S-transferase, N-terminal domain;; Glutathione S-transferase, N-terminal domain	Glutathione S-transferase DHAR3, chloroplastic OS=Arabidopsis thaliana OX=3702 GN=DHAR3 PE=1 SV=1	U	Intracellular trafficking, secretion, and vesicular transport	PREDICTED: glutathione S-transferase DHAR3, chloroplastic [Nicotiana sylvestris]	molecular function: catalytic activity (GO:0003824);; biological process: metabolic process (GO:0008152);; biological process: cellular process (GO:0009987);; cellular component: cell (GO:0005623);; cellular component: organelle (GO:0043226);; cellular component: organelle part (GO:0044422);; cellular component: cell part (GO:0044464);; biological process: response to stimulus (GO:0050896);; biol…
	GST	Niben101Scf11767g02018	Niben101Scf11767g02018	0.220707	0.865195	0.038308	3.29141	8.68906	3.57539	0.035644	0.05686	0.298405	0	0.087248	0.143888	--	--	--	1.14e-15	-3.05316	down	--	--	--	1.07e-20	4.09105	up	--	--	--	[O]	Posttranslational modification, protein turnover, chaperones	Molecular Function: glutathione transferase activity (GO:0004364);; Molecular Function: lactoylglutathione lyase activity (GO:0004462);; Molecular Function: peroxidase activity (GO:0004601);; Cellular Component: cytoplasm (GO:0005737);; Biological Process: glutathione metabolic process (GO:0006749);; Biological Process: toxin catabolic process (GO:0009407);; Biological Process: cellular oxidant d…	K00799|6.30536e-127|sot:102589451|K00799 glutathione S-transferase [EC:2.5.1.18] | (RefSeq) probable glutathione S-transferase	Glutathione metabolism (ko00480)	[O]	Posttranslational modification, protein turnover, chaperones	Glutathione S-transferase, N-terminal domain;; Glutathione S-transferase, N-terminal domain;; Glutathione S-transferase, N-terminal domain;; Glutathione S-transferase, C-terminal domain;; Glutathione S-transferase, C-terminal domain	Probable glutathione S-transferase parC OS=Nicotiana tabacum OX=4097 GN=PARC PE=2 SV=1	O	Posttranslational modification, protein turnover, chaperones	PREDICTED: probable glutathione S-transferase parC [Nicotiana sylvestris]	molecular function: catalytic activity (GO:0003824);; biological process: metabolic process (GO:0008152);; biological process: cellular process (GO:0009987);; biological process: single-organism process (GO:0044699);; biological process: response to stimulus (GO:0050896);; biological process: detoxification (GO:0098754);; molecular function: antioxidant activity (GO:0016209);; cellular component:…
	GPX	Niben101Scf17339g00003	Niben101Scf17339g00003	27.6769	25.4165	29.8945	24.4011	17.4893	18.8202	25.1847	24.9257	22.7778	32.9578	33.3841	28.3209	0.0285953	-0.413626	normal	0.357563	0.303869	normal	0.426564	-0.234586	normal	2.35e-06	-1.01971	down	9.18e-06	-0.689477	down	[VI]	Defense mechanisms;; Lipid transport and metabolism	--	K00432|2.64122e-73|sly:101248896|K00432 glutathione peroxidase [EC:1.11.1.9] | (RefSeq) probable phospholipid hydroperoxide glutathione peroxidase	Glutathione metabolism (ko00480);; Arachidonic acid metabolism (ko00590)	[O]	Posttranslational modification, protein turnover, chaperones	Glutathione peroxidase;; AhpC/TSA family	Putative glutathione peroxidase 7, chloroplastic OS=Arabidopsis thaliana OX=3702 GN=GPX7 PE=3 SV=2	O	Posttranslational modification, protein turnover, chaperones	PREDICTED: probable phospholipid hydroperoxide glutathione peroxidase [Nicotiana sylvestris]	--
	GPX	Niben101Scf02526g00002	Niben101Scf02526g00002	16.8126	7.84346	33.329	8.98547	7.37197	15.3173	22.1023	23.6954	18.0234	30.7032	30.3155	25.2857	0.934984	-0.0676613	normal	0.00360919	0.940758	up	0.759295	-0.181128	normal	3.07e-11	-1.75518	down	4.74e-05	-0.735724	down	[VI]	Defense mechanisms;; Lipid transport and metabolism	Molecular Function: glutathione peroxidase activity (GO:0004602);; Biological Process: response to oxidative stress (GO:0006979);; Biological Process: oxidation-reduction process (GO:0055114);; Biological Process: cellular oxidant detoxification (GO:0098869);;	K00432|5.08628e-99|spen:107028836|K00432 glutathione peroxidase [EC:1.11.1.9] | (RefSeq) probable phospholipid hydroperoxide glutathione peroxidase	Glutathione metabolism (ko00480);; Arachidonic acid metabolism (ko00590)	[O]	Posttranslational modification, protein turnover, chaperones	Glutathione peroxidase;; AhpC/TSA family;; Redoxin	Putative glutathione peroxidase 7, chloroplastic OS=Arabidopsis thaliana OX=3702 GN=GPX7 PE=3 SV=2	O	Posttranslational modification, protein turnover, chaperones	PREDICTED: probable phospholipid hydroperoxide glutathione peroxidase [Nicotiana sylvestris]	biological process: metabolic process (GO:0008152);; biological process: cellular process (GO:0009987);; biological process: single-organism process (GO:0044699);; biological process: response to stimulus (GO:0050896);; biological process: detoxification (GO:0098754);; molecular function: catalytic activity (GO:0003824);; molecular function: antioxidant activity (GO:0016209)
	C4H	Niben101Scf00262g05006	Niben101Scf00262g05006	45.6169	46.9011	52.4442	28.9466	34.8328	20.8888	42.1986	48.7393	34.5206	47.9703	56.7398	49.5962	0.0451538	-0.428283	normal	0.0461239	0.587888	up	0.618709	-0.149565	normal	2.47e-10	-1.25225	down	0.00038457	-0.606629	down	[QV]	Secondary metabolites biosynthesis, transport and catabolism;; Defense mechanisms	Molecular Function: iron ion binding (GO:0005506);; Cellular Component: integral component of membrane (GO:0016021);; Molecular Function: trans-cinnamate 4-monooxygenase activity (GO:0016710);; Molecular Function: heme binding (GO:0020037);; Biological Process: oxidation-reduction process (GO:0055114);;	K00487|0|sot:102605644|K00487 trans-cinnamate 4-monooxygenase [EC:1.14.13.11] | (RefSeq) trans-cinnamate 4-monooxygenase	Ubiquinone and other terpenoid-quinone biosynthesis (ko00130);; Phenylalanine metabolism (ko00360);; Phenylpropanoid biosynthesis (ko00940);; Flavonoid biosynthesis (ko00941);; Stilbenoid, diarylheptanoid and gingerol biosynthesis (ko00945)	[Q]	Secondary metabolites biosynthesis, transport and catabolism	Cytochrome P450	Trans-cinnamate 4-monooxygenase OS=Catharanthus roseus OX=4058 GN=CYP73A4 PE=2 SV=1	Q	Secondary metabolites biosynthesis, transport and catabolism	PREDICTED: trans-cinnamate 4-monooxygenase [Nicotiana sylvestris]	molecular function: binding (GO:0005488);; cellular component: membrane (GO:0016020);; cellular component: membrane part (GO:0044425);; biological process: metabolic process (GO:0008152);; biological process: single-organism process (GO:0044699);; molecular function: catalytic activity (GO:0003824)
	C4H	Niben101Scf08196g01007	Niben101Scf08196g01007	70.1993	77.3243	84.5674	46.6415	46.3861	40.6486	53.1038	53.8546	54.7368	79.9985	96.4367	78.9013	2.37e-07	-0.741954	down	0.0743655	0.333722	normal	0.491575	-0.190071	normal	8.95e-22	-1.3345	down	2.98e-19	-0.974898	down	[QV]	Secondary metabolites biosynthesis, transport and catabolism;; Defense mechanisms	Molecular Function: iron ion binding (GO:0005506);; Cellular Component: integral component of membrane (GO:0016021);; Molecular Function: trans-cinnamate 4-monooxygenase activity (GO:0016710);; Molecular Function: heme binding (GO:0020037);; Biological Process: oxidation-reduction process (GO:0055114);;	K00487|0|sot:102605644|K00487 trans-cinnamate 4-monooxygenase [EC:1.14.13.11] | (RefSeq) trans-cinnamate 4-monooxygenase	Ubiquinone and other terpenoid-quinone biosynthesis (ko00130);; Phenylalanine metabolism (ko00360);; Phenylpropanoid biosynthesis (ko00940);; Flavonoid biosynthesis (ko00941);; Stilbenoid, diarylheptanoid and gingerol biosynthesis (ko00945)	[Q]	Secondary metabolites biosynthesis, transport and catabolism	Cytochrome P450	Trans-cinnamate 4-monooxygenase OS=Glycine max OX=3847 GN=CYP73A11 PE=2 SV=1	Q	Secondary metabolites biosynthesis, transport and catabolism	PREDICTED: trans-cinnamate 4-monooxygenase-like [Nicotiana sylvestris]	molecular function: binding (GO:0005488);; cellular component: membrane (GO:0016020);; cellular component: membrane part (GO:0044425);; biological process: metabolic process (GO:0008152);; biological process: single-organism process (GO:0044699);; molecular function: catalytic activity (GO:0003824)
	4CL	Niben101Scf01063g05023	Niben101Scf01063g05023	33.6392	34.6342	37.8414	24.6734	23.8473	15.1975	28.8188	30.5298	29.2641	36.4044	44.8397	41.9785	0.000836318	-0.491366	normal	0.0871778	0.501092	normal	0.216488	-0.264654	normal	8.78e-10	-1.31862	down	2.13e-11	-0.793702	down	[IQ]	Lipid transport and metabolism;; Secondary metabolites biosynthesis, transport and catabolism	Biological Process: metabolic process (GO:0008152);; Cellular Component: integral component of membrane (GO:0016021);; Molecular Function: ligase activity (GO:0016874);;	K01904|0|spen:107015322|K01904 4-coumarate--CoA ligase [EC:6.2.1.12] | (RefSeq) 4-coumarate--CoA ligase 2-like	Ubiquinone and other terpenoid-quinone biosynthesis (ko00130);; Phenylalanine metabolism (ko00360);; Phenylpropanoid biosynthesis (ko00940)	[I]	Lipid transport and metabolism	AMP-binding enzyme;; AMP-binding enzyme C-terminal domain	4-coumarate--CoA ligase 2 OS=Glycine max OX=3847 PE=2 SV=2	IQ	Lipid transport and metabolism;; Secondary metabolites biosynthesis, transport and catabolism	PREDICTED: 4-coumarate--CoA ligase 2 [Nicotiana attenuata]	biological process: metabolic process (GO:0008152);; cellular component: membrane (GO:0016020);; cellular component: membrane part (GO:0044425);; molecular function: catalytic activity (GO:0003824)
	4CL	Niben101Scf03437g00008	Niben101Scf03437g00008	35.0175	29.7744	32.9589	16.2118	18.9669	24.5056	22.9002	22.9718	16.4923	37.304	35.6462	39.4178	4.82e-06	-0.837441	down	0.761141	0.130871	normal	0.282678	-0.256383	normal	8.15e-13	-1.31409	down	1.21e-10	-1.12992	down	[IQ]	Lipid transport and metabolism;; Secondary metabolites biosynthesis, transport and catabolism	Molecular Function: ATP binding (GO:0005524);; Biological Process: phenylpropanoid metabolic process (GO:0009698);; Molecular Function: 4-coumarate-CoA ligase activity (GO:0016207);;	K01904|0|spen:107014702|K01904 4-coumarate--CoA ligase [EC:6.2.1.12] | (RefSeq) 4-coumarate--CoA ligase 1	Ubiquinone and other terpenoid-quinone biosynthesis (ko00130);; Phenylalanine metabolism (ko00360);; Phenylpropanoid biosynthesis (ko00940)	[I]	Lipid transport and metabolism	AMP-binding enzyme;; AMP-binding enzyme C-terminal domain	4-coumarate--CoA ligase 1 OS=Nicotiana tabacum OX=4097 GN=4CL1 PE=2 SV=1	IQ	Lipid transport and metabolism;; Secondary metabolites biosynthesis, transport and catabolism	4-coumarate--CoA ligase 1 [Nicotiana tabacum]	molecular function: binding (GO:0005488);; biological process: metabolic process (GO:0008152);; biological process: cellular process (GO:0009987);; biological process: single-organism process (GO:0044699);; molecular function: catalytic activity (GO:0003824)
	4CL	Niben101Scf05750g03012	Niben101Scf05750g03012	17.445	18.023	19.1876	12.1584	11.0122	11.7427	18.3338	13.3597	13.554	19.8481	17.3092	19.7396	0.0174245	-0.488696	normal	0.120101	0.416335	normal	0.763969	-0.124894	normal	3.98e-10	-1.10839	down	0.00119769	-0.639638	down	[IQ]	Lipid transport and metabolism;; Secondary metabolites biosynthesis, transport and catabolism	Molecular Function: fatty-acyl-CoA synthase activity (GO:0004321);; Cellular Component: peroxisome (GO:0005777);; Biological Process: jasmonic acid biosynthetic process (GO:0009695);; Cellular Component: integral component of membrane (GO:0016021);; Molecular Function: ligase activity (GO:0016874);;	--	--	[I]	Lipid transport and metabolism	AMP-binding enzyme;; AMP-binding enzyme C-terminal domain	4-coumarate--CoA ligase-like 9 OS=Arabidopsis thaliana OX=3702 GN=4CLL9 PE=1 SV=2	IQ	Lipid transport and metabolism;; Secondary metabolites biosynthesis, transport and catabolism	PREDICTED: 4-coumarate--CoA ligase-like 9 [Nicotiana attenuata]	molecular function: catalytic activity (GO:0003824);; cellular component: cell (GO:0005623);; cellular component: organelle (GO:0043226);; cellular component: cell part (GO:0044464);; biological process: metabolic process (GO:0008152);; biological process: cellular process (GO:0009987);; biological process: single-organism process (GO:0044699);; cellular component: membrane (GO:0016020);; cellula…
	CHS	Niben101Scf00536g15017	Niben101Scf00536g15017	2.49389	1.92309	0.822607	2.04951	2.05317	4.24337	1.87329	2.04657	2.62552	0.113131	0.575154	0.350577	0.922163	0.067996	normal	0.70438	-0.226638	normal	0.00212477	0.84675	up	1.28e-06	2.0756	up	5.41e-07	1.72142	up	[Q]	Secondary metabolites biosynthesis, transport and catabolism	Biological Process: flavonoid biosynthetic process (GO:0009813);; Molecular Function: naringenin-chalcone synthase activity (GO:0016210);;	K00660|0|sot:102577871|K00660 chalcone synthase [EC:2.3.1.74] | (RefSeq) CHS1A, CHS, CHS1B; chalcone synthase 1a	Flavonoid biosynthesis (ko00941);; Circadian rhythm - plant (ko04712)	--	--	Chalcone and stilbene synthases, N-terminal domain;; Chalcone and stilbene synthases, C-terminal domain;; 3-Oxoacyl-[acyl-carrier-protein (ACP)] synthase III C terminal;; 3-Oxoacyl-[acyl-carrier-protein (ACP)] synthase III;; FAE1/Type III polyketide synthase-like protein	Chalcone synthase A OS=Petunia hybrida OX=4102 GN=CHSA PE=2 SV=1	Q	Secondary metabolites biosynthesis, transport and catabolism	chalcone synthase [Nicotiana benthamiana]	biological process: metabolic process (GO:0008152);; molecular function: catalytic activity (GO:0003824)
	CHS	Niben101Scf01146g13015	Niben101Scf01146g13015	7.6865	6.67103	7.04319	13.4209	24.2409	17.9133	12.4304	8.34367	14.1806	4.45898	5.21898	5.73921	0.137354	0.414174	normal	0.135076	-0.522622	normal	0.282482	0.327917	normal	2.35e-09	1.33699	up	0.00112292	0.765773	up	[Q]	Secondary metabolites biosynthesis, transport and catabolism	Biological Process: flavonoid biosynthetic process (GO:0009813);; Molecular Function: naringenin-chalcone synthase activity (GO:0016210);;	K00660|0|spen:107020692|K00660 chalcone synthase [EC:2.3.1.74] | (RefSeq) chalcone synthase 2	Flavonoid biosynthesis (ko00941);; Circadian rhythm - plant (ko04712)	--	--	Chalcone and stilbene synthases, N-terminal domain;; Chalcone and stilbene synthases, C-terminal domain;; 3-Oxoacyl-[acyl-carrier-protein (ACP)] synthase III;; FAE1/Type III polyketide synthase-like protein;; 3-Oxoacyl-[acyl-carrier-protein (ACP)] synthase III C terminal	Chalcone synthase 2 OS=Solanum lycopersicum OX=4081 GN=CHS2 PE=2 SV=2	Q	Secondary metabolites biosynthesis, transport and catabolism	PREDICTED: chalcone synthase 2 [Nicotiana attenuata]	biological process: metabolic process (GO:0008152);; molecular function: catalytic activity (GO:0003824)
	CHS	Niben101Scf02893g00001	Niben101Scf02893g00001	6.12595	5.88769	5.08531	10.0281	15.982	11.6249	8.12039	6.60419	9.01057	4.28104	4.16978	4.77338	0.439784	0.213587	normal	0.0514032	-0.540068	normal	0.499734	0.240845	normal	1.36e-06	1.01988	up	0.0336454	0.468322	normal	[Q]	Secondary metabolites biosynthesis, transport and catabolism	Biological Process: flavonoid biosynthetic process (GO:0009813);; Molecular Function: naringenin-chalcone synthase activity (GO:0016210);;	K00660|0|spen:107020692|K00660 chalcone synthase [EC:2.3.1.74] | (RefSeq) chalcone synthase 2	Flavonoid biosynthesis (ko00941);; Circadian rhythm - plant (ko04712)	--	--	Chalcone and stilbene synthases, N-terminal domain;; Chalcone and stilbene synthases, C-terminal domain;; 3-Oxoacyl-[acyl-carrier-protein (ACP)] synthase III;; 3-Oxoacyl-[acyl-carrier-protein (ACP)] synthase III C terminal;; FAE1/Type III polyketide synthase-like protein	Chalcone synthase 2 OS=Solanum lycopersicum OX=4081 GN=CHS2 PE=2 SV=2	Q	Secondary metabolites biosynthesis, transport and catabolism	PREDICTED: chalcone synthase 2 [Nicotiana attenuata]	biological process: metabolic process (GO:0008152);; molecular function: catalytic activity (GO:0003824)
	I2′H	Niben101Scf07242g01001	Niben101Scf07242g01001	10.503	4.06587	5.34558	1.24999	3.80208	7.9189	39.0012	40.9213	22.0152	10.2047	21.2575	14.7261	0.000326517	1.35142	up	0.00186125	1.47247	up	0.187691	-0.482554	normal	0.00786276	-1.48976	down	0.00886803	0.732474	up	[QV]	Secondary metabolites biosynthesis, transport and catabolism;; Defense mechanisms	Molecular Function: iron ion binding (GO:0005506);; Cellular Component: integral component of membrane (GO:0016021);; Molecular Function: oxidoreductase activity, acting on paired donors, with incorporation or reduction of molecular oxygen, NAD(P)H as one donor, and incorporation of one atom of oxygen (GO:0016709);; Molecular Function: heme binding (GO:0020037);; Biological Process: secondary met…	--	--	[Q]	Secondary metabolites biosynthesis, transport and catabolism	Cytochrome P450	Isoflavone 2&apos;-hydroxylase OS=Glycyrrhiza echinata OX=46348 GN=CYP81E1 PE=1 SV=2	Q	Secondary metabolites biosynthesis, transport and catabolism	PREDICTED: isoflavone 2&apos;-hydroxylase-like [Nicotiana sylvestris]	molecular function: binding (GO:0005488);; cellular component: membrane (GO:0016020);; cellular component: membrane part (GO:0044425);; biological process: metabolic process (GO:0008152);; biological process: single-organism process (GO:0044699);; molecular function: catalytic activity (GO:0003824)
	I2′H	Niben101Scf07242g07006	Niben101Scf07242g07006	5.88657	5.04714	14.5509	6.09268	4.97488	5.84193	21.2044	12.8414	18.7477	18.008	20.2144	6.63215	0.400006	0.455568	normal	1.39e-11	1.5584	up	0.683664	-0.205963	normal	4.49e-07	-1.6437	down	0.92993	-0.0651593	normal	[QV]	Secondary metabolites biosynthesis, transport and catabolism;; Defense mechanisms	Molecular Function: iron ion binding (GO:0005506);; Cellular Component: integral component of membrane (GO:0016021);; Molecular Function: oxidoreductase activity, acting on paired donors, with incorporation or reduction of molecular oxygen, NAD(P)H as one donor, and incorporation of one atom of oxygen (GO:0016709);; Molecular Function: heme binding (GO:0020037);; Biological Process: indole glucos…	--	--	[Q]	Secondary metabolites biosynthesis, transport and catabolism	Cytochrome P450	Cytochrome P450 81F3 OS=Arabidopsis thaliana OX=3702 GN=CYP81F3 PE=2 SV=1	Q	Secondary metabolites biosynthesis, transport and catabolism	PREDICTED: isoflavone 2&apos;-hydroxylase-like [Nicotiana sylvestris]	molecular function: binding (GO:0005488);; cellular component: membrane (GO:0016020);; cellular component: membrane part (GO:0044425);; biological process: metabolic process (GO:0008152);; biological process: single-organism process (GO:0044699);; molecular function: catalytic activity (GO:0003824);; biological process: cellular process (GO:0009987);; biological process: response to stimulus (GO:…
	I2′H	Niben101Scf05989g01008	Niben101Scf05989g01008	6.92362	5.66166	4.09636	17.4622	36.1204	26.6245	8.04402	8.44316	18.6554	3.98101	4.4409	3.90171	0.0567389	0.670543	normal	0.018407	-0.911325	down	0.512798	0.271201	normal	4.05e-20	2.13405	up	0.000734157	0.998077	up	--	--	Biological Process: flavonoid biosynthetic process (GO:0009813);; Molecular Function: chalcone isomerase activity (GO:0045430);;	K01859|6.21378e-95|sot:102599379|K01859 chalcone isomerase [EC:5.5.1.6] | (RefSeq) chalcone--flavonone isomerase B-like	Flavonoid biosynthesis (ko00941)	--	--	Chalcone-flavanone isomerase	Chalcone--flavonone isomerase OS=Nicotiana tabacum OX=4097 GN=CHI PE=2 SV=1	G	Carbohydrate transport and metabolism	PREDICTED: chalcone--flavonone isomerase [Nicotiana attenuata]	biological process: metabolic process (GO:0008152);; molecular function: catalytic activity (GO:0003824)
	3GT	Niben101Scf00270g15011	Niben101Scf00270g15011	0.02008	0.022948	1.58182	0.21556	0.083042	0.375478	3.01592	0.49108	1.38123	0.11472	4.80032	0.368528	0.735841	0.155508	normal	0.000760153	1.55233	up	--	--	--	--	--	--	0.908129	-0.0710551	normal	[G]	Carbohydrate transport and metabolism	Biological Process: flavonoid biosynthetic process (GO:0009813);; Cellular Component: intracellular membrane-bounded organelle (GO:0043231);; Biological Process: flavonoid glucuronidation (GO:0052696);; Molecular Function: quercetin 3-O-glucosyltransferase activity (GO:0080043);; Molecular Function: quercetin 7-O-glucosyltransferase activity (GO:0080044);;	--	--	[GC]	Carbohydrate transport and metabolism;; Energy production and conversion	UDP-glucoronosyl and UDP-glucosyl transferase	UDP-glycosyltransferase 71E1 OS=Stevia rebaudiana OX=55670 GN=UGT71E1 PE=2 SV=1	S	Function unknown	PREDICTED: anthocyanidin 3-O-glucosyltransferase 2-like [Nicotiana sylvestris]	biological process: metabolic process (GO:0008152);; cellular component: cell (GO:0005623);; cellular component: organelle (GO:0043226);; cellular component: cell part (GO:0044464);; biological process: cellular process (GO:0009987);; biological process: single-organism process (GO:0044699);; molecular function: catalytic activity (GO:0003824)
	3GT	Niben101Scf04940g01021	Niben101Scf04940g01021	1.03956	0.800812	2.39363	1.11857	0.984906	0.946686	1.16415	1.13118	1.07235	2.10732	1.86317	2.64264	0.417518	-0.414798	normal	0.765543	0.174105	normal	0.428167	-0.362075	normal	2.41e-06	-1.42219	down	3.72e-05	-1.14719	down	[G]	Carbohydrate transport and metabolism	Biological Process: flavonoid biosynthetic process (GO:0009813);; Cellular Component: intracellular membrane-bounded organelle (GO:0043231);; Biological Process: flavonoid glucuronidation (GO:0052696);; Molecular Function: quercetin 3-O-glucosyltransferase activity (GO:0080043);; Molecular Function: quercetin 7-O-glucosyltransferase activity (GO:0080044);;	--	--	[GC]	Carbohydrate transport and metabolism;; Energy production and conversion	UDP-glucoronosyl and UDP-glucosyl transferase	UDP-glycosyltransferase 43 OS=Pueraria montana var. lobata OX=3893 GN=UGT43 PE=1 SV=2	S	Function unknown	PREDICTED: anthocyanidin 3-O-glucosyltransferase 2-like [Nicotiana sylvestris]	biological process: metabolic process (GO:0008152);; cellular component: cell (GO:0005623);; cellular component: organelle (GO:0043226);; cellular component: cell part (GO:0044464);; biological process: cellular process (GO:0009987);; biological process: single-organism process (GO:0044699);; molecular function: catalytic activity (GO:0003824)
	3GT	Niben101Scf05307g00001	Niben101Scf05307g00001	2.14595	2.40017	2.00439	2.69989	11.5134	2.65808	1.94594	1.63047	1.89526	1.31435	2.02335	0.81259	0.170174	-0.438277	normal	0.0310209	-1.03493	down	0.45268	0.344635	normal	0.00969362	1.23801	up	0.931111	0.0521455	normal	[G]	Carbohydrate transport and metabolism	Biological Process: anthocyanin-containing compound biosynthetic process (GO:0009718);; Cellular Component: intracellular membrane-bounded organelle (GO:0043231);; Molecular Function: anthocyanidin 3-O-glucosyltransferase activity (GO:0047213);; Biological Process: flavonoid glucuronidation (GO:0052696);; Molecular Function: quercetin 3-O-glucosyltransferase activity (GO:0080043);; Molecular Func…	--	--	[GC]	Carbohydrate transport and metabolism;; Energy production and conversion	UDP-glucoronosyl and UDP-glucosyl transferase	Anthocyanidin 3-O-glucosyltransferase OS=Solanum melongena OX=4111 GN=GT PE=2 SV=1	S	Function unknown	anthocyanidin 3-O-glucosyltransferase-like precursor [Nicotiana tabacum]	biological process: metabolic process (GO:0008152);; biological process: single-organism process (GO:0044699);; cellular component: cell (GO:0005623);; cellular component: organelle (GO:0043226);; cellular component: cell part (GO:0044464);; molecular function: catalytic activity (GO:0003824);; biological process: cellular process (GO:0009987)
	3GT	Niben101Scf00113g06004	Niben101Scf00113g06004	0.830234	0.663585	0.256825	1.03405	3.05341	1.75203	0.991512	0.395478	1.01527	0.122713	0.190758	0.304425	0.864001	0.128857	normal	0.106707	-0.818952	normal	--	--	--	1.29e-06	2.14436	up	--	--	--	--	--	Biological Process: anthocyanin-containing compound biosynthetic process (GO:0009718);; Molecular Function: anthocyanidin 3-O-glucosyltransferase activity (GO:0047213);;	--	--	[GC]	Carbohydrate transport and metabolism;; Energy production and conversion	UDP-glucoronosyl and UDP-glucosyl transferase	Anthocyanidin 3-O-glucosyltransferase OS=Petunia hybrida OX=4102 GN=RT PE=2 SV=1	S	Function unknown	PREDICTED: anthocyanidin 3-O-glucosyltransferase [Nicotiana attenuata]	biological process: metabolic process (GO:0008152);; biological process: single-organism process (GO:0044699);; molecular function: catalytic activity (GO:0003824)
	3GT	Niben101Scf02173g00001	Niben101Scf02173g00001	5.97978	5.85203	4.4531	7.47183	18.6024	11.0096	3.90873	1.25708	4.02951	3.68671	5.54421	3.74761	0.0207171	-0.828386	down	0.000188275	-1.45182	down	0.663861	0.202017	normal	0.00110183	0.988732	up	0.071912	-0.671499	normal	--	--	Biological Process: anthocyanin-containing compound biosynthetic process (GO:0009718);; Molecular Function: anthocyanidin 3-O-glucosyltransferase activity (GO:0047213);;	--	--	[GC]	Carbohydrate transport and metabolism;; Energy production and conversion	UDP-glucoronosyl and UDP-glucosyl transferase	Anthocyanidin 3-O-glucosyltransferase OS=Petunia hybrida OX=4102 GN=RT PE=2 SV=1	S	Function unknown	PREDICTED: anthocyanidin 3-O-glucosyltransferase [Nicotiana attenuata]	biological process: metabolic process (GO:0008152);; biological process: single-organism process (GO:0044699);; molecular function: catalytic activity (GO:0003824)
	PAL	Niben101Scf04090g02003	Niben101Scf04090g02003	84.1051	85.1961	108.72	45.5637	39.3337	29.2097	71.8352	75.1221	57.7903	70.246	95.5167	77.7731	0.0013252	-0.645696	down	0.00104945	0.836137	up	0.816556	0.109222	normal	2e-12	-1.45151	down	0.000799242	-0.558098	normal	[E]	Amino acid transport and metabolism	Cellular Component: cytoplasm (GO:0005737);; Biological Process: L-phenylalanine catabolic process (GO:0006559);; Biological Process: cinnamic acid biosynthetic process (GO:0009800);; Molecular Function: phenylalanine ammonia-lyase activity (GO:0045548);;	K10775|0|spen:107030967|K10775 phenylalanine ammonia-lyase [EC:4.3.1.24] | (RefSeq) phenylalanine ammonia-lyase-like	Phenylalanine metabolism (ko00360);; Phenylpropanoid biosynthesis (ko00940)	[Q]	Secondary metabolites biosynthesis, transport and catabolism	Aromatic amino acid lyase	Phenylalanine ammonia-lyase OS=Nicotiana tabacum OX=4097 GN=TPA1 PE=2 SV=1	E	Amino acid transport and metabolism	PREDICTED: phenylalanine ammonia-lyase [Nicotiana attenuata]	cellular component: cell (GO:0005623);; cellular component: cell part (GO:0044464);; biological process: metabolic process (GO:0008152);; biological process: cellular process (GO:0009987);; biological process: single-organism process (GO:0044699);; molecular function: catalytic activity (GO:0003824)
	PAL	Niben101Scf04652g00007	Niben101Scf04652g00007	52.2837	52.8421	66.9747	27.1297	25.7634	17.7922	49.8771	46.7305	36.7334	55.4587	64.8058	51.634	0.00656813	-0.575557	normal	0.000329174	0.903729	up	0.914306	-0.0605859	normal	8.89e-17	-1.64338	down	4.78e-05	-0.67194	down	[E]	Amino acid transport and metabolism	Cellular Component: cytoplasm (GO:0005737);; Biological Process: L-phenylalanine catabolic process (GO:0006559);; Biological Process: cinnamic acid biosynthetic process (GO:0009800);; Molecular Function: phenylalanine ammonia-lyase activity (GO:0045548);;	K10775|0|spen:107030967|K10775 phenylalanine ammonia-lyase [EC:4.3.1.24] | (RefSeq) phenylalanine ammonia-lyase-like	Phenylalanine metabolism (ko00360);; Phenylpropanoid biosynthesis (ko00940)	[Q]	Secondary metabolites biosynthesis, transport and catabolism	Aromatic amino acid lyase;; Aromatic amino acid lyase	Phenylalanine ammonia-lyase OS=Nicotiana tabacum OX=4097 GN=TPA1 PE=2 SV=1	E	Amino acid transport and metabolism	PREDICTED: phenylalanine ammonia-lyase [Nicotiana tomentosiformis]	cellular component: cell (GO:0005623);; cellular component: cell part (GO:0044464);; biological process: metabolic process (GO:0008152);; biological process: cellular process (GO:0009987);; biological process: single-organism process (GO:0044699);; molecular function: catalytic activity (GO:0003824)
	PAL	Niben101Scf04090g02004	Niben101Scf04090g02004	71.2452	79.0437	102.485	37.9178	33.3702	25.2073	66.9245	67.7511	52.9963	66.2265	81.7696	73.6566	0.0054421	-0.62656	down	0.000119417	0.944614	up	0.847201	0.103016	normal	3.95e-15	-1.56247	down	0.000813529	-0.552817	normal	[E]	Amino acid transport and metabolism	Cellular Component: cytoplasm (GO:0005737);; Biological Process: L-phenylalanine catabolic process (GO:0006559);; Biological Process: cinnamic acid biosynthetic process (GO:0009800);; Molecular Function: phenylalanine ammonia-lyase activity (GO:0045548);;	K10775|1.78384e-69|spen:107013137|K10775 phenylalanine ammonia-lyase [EC:4.3.1.24] | (RefSeq) phenylalanine ammonia-lyase-like	Phenylalanine metabolism (ko00360);; Phenylpropanoid biosynthesis (ko00940)	[Q]	Secondary metabolites biosynthesis, transport and catabolism	Aromatic amino acid lyase	Phenylalanine ammonia-lyase OS=Nicotiana tabacum OX=4097 GN=TPA1 PE=2 SV=1	E	Amino acid transport and metabolism	phenylalanine ammonia-lyase-like [Nicotiana tabacum]	cellular component: cell (GO:0005623);; cellular component: cell part (GO:0044464);; biological process: metabolic process (GO:0008152);; biological process: cellular process (GO:0009987);; biological process: single-organism process (GO:0044699);; molecular function: catalytic activity (GO:0003824)
	PAL	Niben101Scf05442g03015	Niben101Scf05442g03015	138.326	143.999	169.298	95.0456	72.8356	72.9274	137.106	116.243	119.747	132.42	170.169	136.033	0.00438932	-0.501361	normal	0.00419301	0.654006	up	0.968241	-0.0240465	normal	2.26e-11	-1.24077	down	5.31e-05	-0.55144	normal	[E]	Amino acid transport and metabolism	Cellular Component: cytoplasm (GO:0005737);; Biological Process: L-phenylalanine catabolic process (GO:0006559);; Biological Process: cinnamic acid biosynthetic process (GO:0009800);; Molecular Function: phenylalanine ammonia-lyase activity (GO:0045548);;	K10775|0|spen:107002228|K10775 phenylalanine ammonia-lyase [EC:4.3.1.24] | (RefSeq) phenylalanine ammonia-lyase	Phenylalanine metabolism (ko00360);; Phenylpropanoid biosynthesis (ko00940)	[Q]	Secondary metabolites biosynthesis, transport and catabolism	Aromatic amino acid lyase	Phenylalanine ammonia-lyase OS=Nicotiana tabacum OX=4097 PE=2 SV=1	E	Amino acid transport and metabolism	phenylalanine ammonia-lyase [Solanum melongena]	cellular component: cell (GO:0005623);; cellular component: cell part (GO:0044464);; biological process: metabolic process (GO:0008152);; biological process: cellular process (GO:0009987);; biological process: single-organism process (GO:0044699);; molecular function: catalytic activity (GO:0003824)
	PAL	Niben101Scf05617g00005	Niben101Scf05617g00005	28.1814	27.8276	36.6505	12.4147	13.0737	8.36465	21.1525	19.8784	18.8561	27.6604	31.9955	25.0376	3.67e-06	-0.829	down	0.000467951	0.830268	up	0.932092	0.0521513	normal	4.55e-17	-1.68472	down	9.21e-10	-0.811775	down	[E]	Amino acid transport and metabolism	Cellular Component: cytoplasm (GO:0005737);; Biological Process: L-phenylalanine catabolic process (GO:0006559);; Biological Process: cinnamic acid biosynthetic process (GO:0009800);; Molecular Function: phenylalanine ammonia-lyase activity (GO:0045548);;	K10775|0|sot:102596017|K10775 phenylalanine ammonia-lyase [EC:4.3.1.24] | (RefSeq) PAL; phenylalanine ammonia-lyase-like	Phenylalanine metabolism (ko00360);; Phenylpropanoid biosynthesis (ko00940)	[Q]	Secondary metabolites biosynthesis, transport and catabolism	Aromatic amino acid lyase	Phenylalanine ammonia-lyase OS=Nicotiana tabacum OX=4097 GN=TPA1 PE=2 SV=1	E	Amino acid transport and metabolism	phenylalanine ammonia-lyase [Solanum melongena]	cellular component: cell (GO:0005623);; cellular component: cell part (GO:0044464);; biological process: metabolic process (GO:0008152);; biological process: cellular process (GO:0009987);; biological process: single-organism process (GO:0044699);; molecular function: catalytic activity (GO:0003824)
	PAL	Niben101Scf12881g00009	Niben101Scf12881g00009	53.0408	57.2376	60.999	30.8152	28.891	30.9644	49.1561	48.7055	40.9337	44.3514	51.4969	42.5927	0.00181172	-0.526699	normal	0.000227054	0.657628	up	0.38109	0.214264	normal	1.62e-13	-1.01862	down	0.0495958	-0.32204	normal	[E]	Amino acid transport and metabolism	Cellular Component: cytoplasm (GO:0005737);; Biological Process: L-phenylalanine catabolic process (GO:0006559);; Biological Process: cinnamic acid biosynthetic process (GO:0009800);; Molecular Function: phenylalanine ammonia-lyase activity (GO:0045548);;	K10775|0|sly:101243656|K10775 phenylalanine ammonia-lyase [EC:4.3.1.24] | (RefSeq) PAL6; phenylalanine ammonia-lyase 6	Phenylalanine metabolism (ko00360);; Phenylpropanoid biosynthesis (ko00940)	[Q]	Secondary metabolites biosynthesis, transport and catabolism	Aromatic amino acid lyase	Phenylalanine ammonia-lyase OS=Nicotiana tabacum OX=4097 PE=2 SV=1	E	Amino acid transport and metabolism	phenylalanine ammonia-lyase [Nicotiana tabacum]	cellular component: cell (GO:0005623);; cellular component: cell part (GO:0044464);; biological process: metabolic process (GO:0008152);; biological process: cellular process (GO:0009987);; biological process: single-organism process (GO:0044699);; molecular function: catalytic activity (GO:0003824)
ROS production	NADPH	Niben101Scf02437g06007	Niben101Scf02437g06007	0.177784	0.321766	0.211795	0.37934	0.745033	0.453944	0.42748	0.376055	0.426532	0.217388	0.186062	0.081743	0.443932	0.388468	normal	0.760936	-0.19947	normal	--	--	--	0.036228	1.00182	up	0.102866	0.715195	normal	[T]	Signal transduction mechanisms	Biological Process: defense response (GO:0006952);; Molecular Function: oxidoreductase activity (GO:0016491);;	K13447|0|gmx:100796455|K13447 respiratory burst oxidase [EC:1.6.3.- 1.11.1.-] | (RefSeq) respiratory burst oxidase homolog protein E-like	Plant-pathogen interaction (ko04626)	[PQ]	Inorganic ion transport and metabolism;; Secondary metabolites biosynthesis, transport and catabolism	Respiratory burst NADPH oxidase;; Ferric reductase NAD binding domain;; FAD-binding domain;; Ferric reductase like transmembrane component;; EF-hand domain pair	Respiratory burst oxidase homolog protein E OS=Arabidopsis thaliana OX=3702 GN=RBOHE PE=2 SV=2	U	Intracellular trafficking, secretion, and vesicular transport	PREDICTED: respiratory burst oxidase homolog protein E-like isoform X2 [Glycine max]	biological process: response to stimulus (GO:0050896);; molecular function: catalytic activity (GO:0003824)
	PLD	Niben101Scf00539g07022	Niben101Scf00539g07022	61.1246	65.6359	56.7257	42.1822	37.7142	28.917	31.5216	37.4654	37.975	75.5985	71.8871	83.3915	2.73e-14	-0.98926	down	0.940897	0.0376699	normal	0.0339243	-0.379015	normal	2.65e-13	-1.46159	down	1.91e-22	-1.40239	down	[I]	Lipid transport and metabolism	Molecular Function: phospholipase D activity (GO:0004630);; Molecular Function: calcium ion binding (GO:0005509);; Cellular Component: membrane (GO:0016020);; Biological Process: lipid catabolic process (GO:0016042);; Biological Process: phosphatidylcholine metabolic process (GO:0046470);; Molecular Function: N-acylphosphatidylethanolamine-specific phospholipase D activity (GO:0070290);;	K01115|0|sot:102583483|K01115 phospholipase D1/2 [EC:3.1.4.4] | (RefSeq) phospholipase D delta-like	Glycerophospholipid metabolism (ko00564);; Ether lipid metabolism (ko00565);; Endocytosis (ko04144)	[I]	Lipid transport and metabolism	Phospholipase D C terminal;; Phospholipase D Active site motif;; PLD-like domain;; Copper binding proteins, plastocyanin/azurin family;; Cupredoxin-like domain	Phospholipase D delta OS=Arabidopsis thaliana OX=3702 GN=PLDDELTA PE=1 SV=2	I	Lipid transport and metabolism	PREDICTED: phospholipase D delta-like [Nicotiana attenuata]	molecular function: catalytic activity (GO:0003824);; molecular function: binding (GO:0005488);; cellular component: membrane (GO:0016020);; biological process: metabolic process (GO:0008152);; biological process: single-organism process (GO:0044699);; biological process: cellular process (GO:0009987)
	PLD	Niben101Scf02001g01005	Niben101Scf02001g01005	1.75431	1.3584	1.88552	2.32117	3.83039	3.26364	1.72885	1.49723	3.10634	0.901493	0.755452	0.869418	0.902184	0.0732642	normal	0.341187	-0.420122	normal	0.016118	0.652978	up	2.61e-08	1.36623	up	0.00719315	0.831769	up	[I]	Lipid transport and metabolism	Molecular Function: phospholipase D activity (GO:0004630);; Molecular Function: calcium ion binding (GO:0005509);; Cellular Component: membrane (GO:0016020);; Biological Process: lipid catabolic process (GO:0016042);; Biological Process: phosphatidylcholine metabolic process (GO:0046470);; Molecular Function: N-acylphosphatidylethanolamine-specific phospholipase D activity (GO:0070290);;	K01115|0|spen:107009422|K01115 phospholipase D1/2 [EC:3.1.4.4] | (RefSeq) phospholipase D delta-like	Glycerophospholipid metabolism (ko00564);; Ether lipid metabolism (ko00565);; Endocytosis (ko04144)	[I]	Lipid transport and metabolism	Phospholipase D C terminal;; C2 domain;; Phospholipase D Active site motif;; PLD-like domain	Phospholipase D delta OS=Arabidopsis thaliana OX=3702 GN=PLDDELTA PE=1 SV=2	I	Lipid transport and metabolism	PREDICTED: phospholipase D delta-like [Nicotiana sylvestris]	molecular function: catalytic activity (GO:0003824);; molecular function: binding (GO:0005488);; cellular component: membrane (GO:0016020);; biological process: metabolic process (GO:0008152);; biological process: single-organism process (GO:0044699);; biological process: cellular process (GO:0009987)
	PLD	Niben101Scf03865g00006	Niben101Scf03865g00006	71.4	84.5139	78.89	63.7576	47.4257	38.0896	37.5247	58.0861	55.259	104.84	83.8544	105.957	2.59e-05	-0.824169	down	0.912557	0.066599	normal	0.122039	-0.362247	normal	4.5e-08	-1.3366	down	7.07e-10	-1.22694	down	[I]	Lipid transport and metabolism	Molecular Function: phospholipase D activity (GO:0004630);; Molecular Function: calcium ion binding (GO:0005509);; Cellular Component: membrane (GO:0016020);; Biological Process: lipid catabolic process (GO:0016042);; Biological Process: phosphatidylcholine metabolic process (GO:0046470);; Molecular Function: N-acylphosphatidylethanolamine-specific phospholipase D activity (GO:0070290);;	K01115|0|sly:101248969|K01115 phospholipase D1/2 [EC:3.1.4.4] | (RefSeq) phospholipase D delta-like	Glycerophospholipid metabolism (ko00564);; Ether lipid metabolism (ko00565);; Endocytosis (ko04144)	[I]	Lipid transport and metabolism	Phospholipase D C terminal;; C2 domain;; Phospholipase D Active site motif;; PLD-like domain;; Copper binding proteins, plastocyanin/azurin family;; Cupredoxin-like domain	Phospholipase D delta OS=Arabidopsis thaliana OX=3702 GN=PLDDELTA PE=1 SV=2	I	Lipid transport and metabolism	PREDICTED: phospholipase D delta-like [Nicotiana attenuata]	molecular function: catalytic activity (GO:0003824);; molecular function: binding (GO:0005488);; cellular component: membrane (GO:0016020);; biological process: metabolic process (GO:0008152);; biological process: single-organism process (GO:0044699);; biological process: cellular process (GO:0009987)
	PLD	Niben101Scf12609g01009	Niben101Scf12609g01009	0.482657	0.503588	0.533435	0.611384	0.956905	1.01061	0.486753	0.316582	0.606087	0.259349	0.362788	0.135737	0.570118	-0.284019	normal	0.140864	-0.642536	normal	0.25078	0.457129	normal	0.00356501	1.1581	up	0.394486	0.418261	normal	[I]	Lipid transport and metabolism	Molecular Function: phospholipase D activity (GO:0004630);; Molecular Function: calcium ion binding (GO:0005509);; Biological Process: response to water deprivation (GO:0009414);; Biological Process: response to salt stress (GO:0009651);; Biological Process: response to abscisic acid (GO:0009737);; Cellular Component: membrane (GO:0016020);; Biological Process: membrane lipid catabolic process (G…	K01115|0|sot:102591907|K01115 phospholipase D1/2 [EC:3.1.4.4] | (RefSeq) phospholipase D alpha 1-like	Glycerophospholipid metabolism (ko00564);; Ether lipid metabolism (ko00565);; Endocytosis (ko04144)	[I]	Lipid transport and metabolism	Phospholipase D C terminal;; Phospholipase D Active site motif;; C2 domain;; PLD-like domain	Phospholipase D alpha 1 OS=Carica papaya OX=3649 GN=PLD1 PE=1 SV=1	I	Lipid transport and metabolism	PREDICTED: phospholipase D alpha 1-like [Nicotiana sylvestris]	molecular function: catalytic activity (GO:0003824);; molecular function: binding (GO:0005488);; biological process: response to stimulus (GO:0050896);; cellular component: membrane (GO:0016020);; biological process: metabolic process (GO:0008152);; biological process: cellular process (GO:0009987);; biological process: single-organism process (GO:0044699)
	PLD	Niben101Scf14688g00017	Niben101Scf14688g00017	0.363111	0.488608	0.294022	0.494474	0.472202	0.587905	0.292923	0.197525	0.474135	0.142599	0.232798	0.122406	0.535313	-0.33936	normal	0.40297	-0.461778	normal	0.214314	0.475854	normal	0.0138334	1.01835	up	--	--	--	[I]	Lipid transport and metabolism	Molecular Function: phospholipase D activity (GO:0004630);; Molecular Function: calcium ion binding (GO:0005509);; Biological Process: response to water deprivation (GO:0009414);; Biological Process: response to salt stress (GO:0009651);; Biological Process: response to abscisic acid (GO:0009737);; Cellular Component: membrane (GO:0016020);; Biological Process: membrane lipid catabolic process (G…	K01115|0|sot:102591907|K01115 phospholipase D1/2 [EC:3.1.4.4] | (RefSeq) phospholipase D alpha 1-like	Glycerophospholipid metabolism (ko00564);; Ether lipid metabolism (ko00565);; Endocytosis (ko04144)	[I]	Lipid transport and metabolism	Phospholipase D C terminal;; Phospholipase D Active site motif;; C2 domain;; PLD-like domain	Phospholipase D alpha 1 OS=Carica papaya OX=3649 GN=PLD1 PE=1 SV=1	I	Lipid transport and metabolism	PREDICTED: phospholipase D alpha 1-like [Nicotiana sylvestris]	molecular function: catalytic activity (GO:0003824);; molecular function: binding (GO:0005488);; biological process: response to stimulus (GO:0050896);; cellular component: membrane (GO:0016020);; biological process: metabolic process (GO:0008152);; biological process: cellular process (GO:0009987);; biological process: single-organism process (GO:0044699)
note: P+H, PBS solution + H2O; P+B, PBS solution + boron; C+H, CGMMV + H2O; C+B, CGMMV + boron.

## Sheet: TFs
Supplementary Table 10. DEGs of various biological functional classifications.
#Gene ID	Gene_name	P+B-1	P+B-2	P+B-3	C+H-1	C+H-2	C+H-3	C+B-1	C+B-2	C+B-3	P+H-1	P+H-2	P+H-3	P+B-1_P+B-2_P+B-3_vs_C+B-1_C+B-2_C+B-3_DESeq2_FDR	P+B-1_P+B-2_P+B-3_vs_C+B-1_C+B-2_C+B-3_DESeq2_log2FC	P+B-1_P+B-2_P+B-3_vs_C+B-1_C+B-2_C+B-3_DESeq2_(FDR_0.05_FC_2)_regulated	C+H-1_C+H-2_C+H-3_vs_C+B-1_C+B-2_C+B-3_DESeq2_FDR	C+H-1_C+H-2_C+H-3_vs_C+B-1_C+B-2_C+B-3_DESeq2_log2FC	C+H-1_C+H-2_C+H-3_vs_C+B-1_C+B-2_C+B-3_DESeq2_(FDR_0.05_FC_2)_regulated	P+H-1_P+H-2_P+H-3_vs_P+B-1_P+B-2_P+B-3_DESeq2_FDR	P+H-1_P+H-2_P+H-3_vs_P+B-1_P+B-2_P+B-3_DESeq2_log2FC	P+H-1_P+H-2_P+H-3_vs_P+B-1_P+B-2_P+B-3_DESeq2_(FDR_0.05_FC_2)_regulated	P+H-1_P+H-2_P+H-3_vs_C+H-1_C+H-2_C+H-3_DESeq2_FDR	P+H-1_P+H-2_P+H-3_vs_C+H-1_C+H-2_C+H-3_DESeq2_log2FC	P+H-1_P+H-2_P+H-3_vs_C+H-1_C+H-2_C+H-3_DESeq2_(FDR_0.05_FC_2)_regulated	P+H-1_P+H-2_P+H-3_vs_C+B-1_C+B-2_C+B-3_DESeq2_FDR	P+H-1_P+H-2_P+H-3_vs_C+B-1_C+B-2_C+B-3_DESeq2_log2FC	P+H-1_P+H-2_P+H-3_vs_C+B-1_C+B-2_C+B-3_DESeq2_(FDR_0.05_FC_2)_regulated	COG_class	COG_class_annotation	GO_annotation	KEGG_annotation	KEGG_pathway_annotation	KOG_class	KOG_class_annotation	Pfam_annotation	Swiss_Prot_annotation	eggNOG_class	eggNOG_class_annotation	NR_annotation	GO_second_level_annotation
WRKY
Niben101Scf09325g05001	Niben101Scf09325g05001	1.71676	1.92306	5.33432	2.38814	0.678425	1.32659	2.51209	2.238	10.8514	2.92501	8.68762	3.99034	--	--	--	--	--	--	0.503135	-0.31581	normal	0.000439	-1.67412	down	0.763492	-0.19746	normal	--	--	Molecular Function: DNA binding (GO:0003677);; Biological Process: regulation of transcription, DNA-templated (GO:0006355);;	--	--	--	--	WRKY DNA -binding domain	Probable WRKY transcription factor 75 OS=Arabidopsis thaliana OX=3702 GN=WRKY75 PE=2 SV=1	K	Transcription	PREDICTED: probable WRKY transcription factor 75 [Nicotiana attenuata]	molecular function: binding (GO:0005488);; biological process: biological regulation (GO:0065007)
Niben101Scf07223g02009	Niben101Scf07223g02009	0.356336	0.50066	0.065029	1.01334	2.58361	0.684927	0.250778	0.320769	0.461685	0.091497	0.152061	0.148087	--	--	--	0.004158	-1.29665	down	--	--	--	4.8e-07	2.28724	up	--	--	--	--	--	Molecular Function: transcription factor activity, sequence-specific DNA binding (GO:0003700);; Biological Process: regulation of transcription, DNA-templated (GO:0006355);; Biological Process: seed coat development (GO:0010214);; Molecular Function: sequence-specific DNA binding (GO:0043565);;	--	--	--	--	WRKY DNA -binding domain	WRKY transcription factor 44 OS=Arabidopsis thaliana OX=3702 GN=WRKY44 PE=1 SV=2	K	Transcription	PREDICTED: WRKY transcription factor 44 isoform X1 [Nicotiana sylvestris]	biological process: biological regulation (GO:0065007);; molecular function: nucleic acid binding transcription factor activity (GO:0001071);; biological process: reproduction (GO:0000003);; biological process: reproductive process (GO:0022414);; biological process: developmental process (GO:0032502);; molecular function: binding (GO:0005488)
Niben101Scf04628g00001	Niben101Scf04628g00001	0.45226	1.30095	0.237815	3.23842	2.73188	3.20792	0.762639	0.732982	1.59732	0.091134	0.325523	0.236822	--	--	--	0.007071	-1.12669	down	--	--	--	1.09e-09	2.56729	up	--	--	--	--	--	Molecular Function: transcription factor activity, sequence-specific DNA binding (GO:0003700);; Biological Process: regulation of transcription, DNA-templated (GO:0006355);; Molecular Function: sequence-specific DNA binding (GO:0043565);;	--	--	--	--	WRKY DNA -binding domain	Probable WRKY transcription factor 49 OS=Arabidopsis thaliana OX=3702 GN=WRKY49 PE=2 SV=1	K	Transcription	PREDICTED: probable WRKY transcription factor 49 [Nicotiana attenuata]	biological process: biological regulation (GO:0065007);; molecular function: nucleic acid binding transcription factor activity (GO:0001071);; molecular function: binding (GO:0005488)
Niben101Scf06603g03002	Niben101Scf06603g03002	0.216868	0.21678	0.209541	5.27745	4.5774	7.03238	0.576875	0.9233	1.09952	0.942576	1.19611	0.376956	--	--	--	8.61e-15	-2.21532	down	--	--	--	1.7e-09	2.05951	up	0.746441	-0.19519	normal	--	--	Molecular Function: transcription factor activity, sequence-specific DNA binding (GO:0003700);; Biological Process: regulation of transcription, DNA-templated (GO:0006355);; Molecular Function: sequence-specific DNA binding (GO:0043565);;	--	--	--	--	WRKY DNA -binding domain	Probable WRKY transcription factor 70 OS=Arabidopsis thaliana OX=3702 GN=WRKY70 PE=2 SV=1	K	Transcription	PREDICTED: probable WRKY transcription factor 70 [Nicotiana tomentosiformis]	biological process: biological regulation (GO:0065007);; molecular function: nucleic acid binding transcription factor activity (GO:0001071);; molecular function: binding (GO:0005488)
Niben101Scf03009g03002	Niben101Scf03009g03002	6.62442	4.02703	3.80238	7.14194	7.33816	9.24848	16.084	14.9149	14.1008	5.24927	9.74919	2.56264	3.39e-09	1.26541	up	3.84e-07	0.947775	normal	0.888798	-0.1092	normal	0.962873	0.028353	normal	0.120414	0.710939	normal	--	--	Molecular Function: DNA binding (GO:0003677);; Biological Process: response to water deprivation (GO:0009414);;	--	--	--	--	WRKY DNA -binding domain;; Plant zinc cluster domain	Probable WRKY transcription factor 7 OS=Arabidopsis thaliana OX=3702 GN=WRKY7 PE=1 SV=1	K	Transcription	PREDICTED: probable WRKY transcription factor 15 [Nicotiana sylvestris]	molecular function: binding (GO:0005488);; biological process: response to stimulus (GO:0050896)
Niben101Scf01833g00002	Niben101Scf01833g00002	0.606779	0.572558	0.92573	0.954055	1.87764	1.73418	3.18047	2.78615	2.668	1.69972	1.1395	1.66553	1.9e-05	1.3538	up	0.030806	0.828838	normal	0.152968	-0.52013	normal	0.431802	-0.37756	normal	0.182215	0.49227	normal	--	--	--	--	--	--	--	WRKY DNA -binding domain	Probable WRKY transcription factor 48 OS=Arabidopsis thaliana OX=3702 GN=WRKY48 PE=2 SV=1	K	Transcription	PREDICTED: probable WRKY transcription factor 23 [Nicotiana sylvestris]	--
Niben101Scf02516g01004	Niben101Scf02516g01004	0.326382	0.253047	1.02849	0.313492	0.530472	0.773756	2.15704	0.568649	1.32265	0.852842	1.48133	0.858859	0.23951	0.589728	normal	0.061247	0.937709	normal	0.309534	-0.41681	normal	0.001727	-1.21891	down	0.992446	0.006862	normal	--	--	Molecular Function: transcription factor activity, sequence-specific DNA binding (GO:0003700);; Biological Process: regulation of transcription, DNA-templated (GO:0006355);; Molecular Function: sequence-specific DNA binding (GO:0043565);;	--	--	--	--	WRKY DNA -binding domain	WRKY transcription factor 6 OS=Arabidopsis thaliana OX=3702 GN=WRKY6 PE=1 SV=1	K	Transcription	PREDICTED: probable WRKY transcription factor 31 isoform X2 [Nicotiana attenuata]	biological process: biological regulation (GO:0065007);; molecular function: nucleic acid binding transcription factor activity (GO:0001071);; molecular function: binding (GO:0005488)
Niben101Scf03962g01005	Niben101Scf03962g01005	1.92595	2.35817	2.44311	4.39329	5.87638	5.1392	4.42624	3.93876	4.37738	1.6281	2.19215	1.66296	0.007729	0.616504	normal	0.556283	-0.18574	normal	0.785892	0.162055	normal	8.23e-07	1.01444	up	5.77e-05	0.818963	normal	--	--	--	--	--	--	--	WRKY DNA -binding domain	Probable WRKY transcription factor 32 OS=Arabidopsis thaliana OX=3702 GN=WRKY32 PE=2 SV=1	K	Transcription	PREDICTED: probable WRKY transcription factor 32 [Nicotiana tomentosiformis]	--
Niben101Scf06091g04005	Niben101Scf06091g04005	0.570044	0.403461	1.02211	0	0.270569	0.042471	4.6373	1.53694	1.81221	0.654584	1.04667	0.441758	0.005284	1.10304	up	0.089567	0.79186	normal	0.946782	-0.0631	normal	--	--	--	0.003839	1.12531	up	--	--	--	--	--	--	--	WRKY DNA -binding domain	Probable WRKY transcription factor 40 OS=Arabidopsis thaliana OX=3702 GN=WRKY40 PE=1 SV=1	K	Transcription	PREDICTED: probable WRKY transcription factor 40 [Nicotiana attenuata]	--
Niben101Scf04944g05002	Niben101Scf04944g05002	0.427685	0.466083	1.4658	8.60207	2.34506	9.35072	5.51877	3.70624	2.58646	0.810328	3.7794	1.76656	0.00073	1.28739	up	0.397779	-0.50347	normal	0.190822	-0.466	normal	0.216562	0.798921	normal	0.381945	0.429541	normal	--	--	Molecular Function: transcription factor activity, sequence-specific DNA binding (GO:0003700);; Biological Process: regulation of transcription, DNA-templated (GO:0006355);; Molecular Function: sequence-specific DNA binding (GO:0043565);;	--	--	--	--	WRKY DNA -binding domain	Probable WRKY transcription factor 40 OS=Arabidopsis thaliana OX=3702 GN=WRKY40 PE=1 SV=1	--	--	PREDICTED: probable WRKY transcription factor 40 [Nicotiana sylvestris]	biological process: biological regulation (GO:0065007);; molecular function: nucleic acid binding transcription factor activity (GO:0001071);; molecular function: binding (GO:0005488)
Niben101Scf02565g02006	Niben101Scf02565g02006	0.149754	0.519301	0.276761	1.34392	1.01681	2.22031	1.08191	1.33557	0.842956	0.056005	0.196141	0.245136	0.030599	0.920125	normal	0.618967	-0.31226	normal	--	--	--	1.48e-05	2.02809	up	0.000274	1.44725	up	--	--	--	--	--	--	--	--	--	--	--	PREDICTED: probable WRKY transcription factor 41 [Nicotiana tabacum]	--
Niben101Scf36703g00001	Niben101Scf36703g00001	2.22623	2.62562	3.23025	5.04056	6.47991	4.44839	3.98975	3.37999	3.95974	2.23476	1.60176	1.57461	0.714871	0.193603	normal	0.399145	-0.35952	normal	0.653268	0.255541	normal	0.004071	1.00447	up	0.108624	0.595628	normal	--	--	Biological Process: transcription, DNA-templated (GO:0006351);;	--	--	--	--	AP2 domain	Ethylene-responsive transcription factor ERF110 OS=Arabidopsis thaliana OX=3702 GN=ERF110 PE=2 SV=2	K	Transcription	PREDICTED: probable WRKY transcription factor 41 isoform X2 [Nicotiana sylvestris]	biological process: metabolic process (GO:0008152);; biological process: cellular process (GO:0009987)
Niben101Scf08604g00003	Niben101Scf08604g00003	1.31942	2.16314	0.261214	2.97993	3.46908	2.83492	0.264622	0.967538	1.9434	0.283885	0.907476	0.460713	0.762678	-0.21347	normal	0.058231	-0.95874	normal	0.472457	0.309266	normal	9.19e-07	1.78488	up	0.568883	0.34151	normal	--	--	--	--	--	--	--	WRKY DNA -binding domain	Probable WRKY transcription factor 49 OS=Arabidopsis thaliana OX=3702 GN=WRKY49 PE=2 SV=1	K	Transcription	PREDICTED: probable WRKY transcription factor 49 [Nicotiana attenuata]	--
Niben101Scf10306g00003	Niben101Scf10306g00003	0.434154	0.55856	0.731262	0.669938	1.04407	0.824352	2.47687	0.8539	2.53074	0.551979	0.766462	0.262754	0.007759	1.02465	up	0.036696	0.947589	normal	0.980935	0.027548	normal	0.710345	0.21541	normal	0.004997	1.1046	up	--	--	Molecular Function: transcription factor activity, sequence-specific DNA binding (GO:0003700);; Biological Process: regulation of transcription, DNA-templated (GO:0006355);; Biological Process: jasmonic acid mediated signaling pathway (GO:0009867);; Molecular Function: sequence-specific DNA binding (GO:0043565);; Biological Process: defense response to fungus (GO:0050832);;	--	--	--	--	WRKY DNA -binding domain	Probable WRKY transcription factor 50 OS=Arabidopsis thaliana OX=3702 GN=WRKY50 PE=2 SV=1	K	Transcription	PREDICTED: probable WRKY transcription factor 50 [Nicotiana sylvestris]	biological process: biological regulation (GO:0065007);; molecular function: nucleic acid binding transcription factor activity (GO:0001071);; biological process: cellular process (GO:0009987);; biological process: signaling (GO:0023052);; biological process: single-organism process (GO:0044699);; biological process: response to stimulus (GO:0050896);; molecular function: binding (GO:0005488);; b…
Niben101Scf01942g04001	Niben101Scf01942g04001	0.108695	0.438594	0.694164	3.39908	1.26906	2.74965	4.12493	2.7214	2.85418	0.91433	1.80523	0.476127	1.57e-06	1.71373	up	0.578527	0.334391	normal	--	--	--	0.213685	0.660703	normal	0.009599	0.971913	normal	--	--	Molecular Function: transcription factor activity, sequence-specific DNA binding (GO:0003700);; Biological Process: regulation of transcription, DNA-templated (GO:0006355);; Molecular Function: sequence-specific DNA binding (GO:0043565);;	--	--	--	--	WRKY DNA -binding domain	Probable WRKY transcription factor 51 OS=Arabidopsis thaliana OX=3702 GN=WRKY51 PE=1 SV=1	--	--	PREDICTED: probable WRKY transcription factor 51 isoform X1 [Nicotiana sylvestris]	biological process: biological regulation (GO:0065007);; molecular function: nucleic acid binding transcription factor activity (GO:0001071);; molecular function: binding (GO:0005488)
Niben101Scf28100g00004	Niben101Scf28100g00004	3.52179	2.64267	4.09009	3.03712	1.90876	2.34424	6.31117	3.71588	4.53152	3.30491	6.51275	2.53969	0.604584	0.21953	normal	0.006268	0.913551	normal	0.726018	-0.20872	normal	0.002972	-1.03436	down	0.904196	-0.06533	normal	--	--	Molecular Function: transcription factor activity, sequence-specific DNA binding (GO:0003700);; Molecular Function: calmodulin binding (GO:0005516);; Biological Process: regulation of transcription, DNA-templated (GO:0006355);; Molecular Function: sequence-specific DNA binding (GO:0043565);;	--	--	--	--	WRKY DNA -binding domain;; Plant zinc cluster domain	Probable WRKY transcription factor 7 OS=Arabidopsis thaliana OX=3702 GN=WRKY7 PE=1 SV=1	K	Transcription	PREDICTED: probable WRKY transcription factor 7 [Nicotiana attenuata]	biological process: biological regulation (GO:0065007);; molecular function: nucleic acid binding transcription factor activity (GO:0001071);; molecular function: binding (GO:0005488)
Niben101Scf03348g00010	Niben101Scf03348g00010	0.664551	0.635629	1.20836	1.67918	2.96608	1.92168	5.56998	3.16798	3.74887	0.578193	1.22624	0.517373	1.48e-06	1.54092	up	0.026637	0.844252	normal	--	--	--	0.035408	0.906346	normal	2.3e-07	1.6582	up	--	--	Molecular Function: transcription factor activity, sequence-specific DNA binding (GO:0003700);; Biological Process: regulation of transcription, DNA-templated (GO:0006355);; Molecular Function: sequence-specific DNA binding (GO:0043565);;	--	--	--	--	WRKY DNA -binding domain	Probable WRKY transcription factor 70 OS=Arabidopsis thaliana OX=3702 GN=WRKY70 PE=2 SV=1	K	Transcription	PREDICTED: probable WRKY transcription factor 70 [Nicotiana tomentosiformis]	biological process: biological regulation (GO:0065007);; molecular function: nucleic acid binding transcription factor activity (GO:0001071);; molecular function: binding (GO:0005488)
Niben101Scf06909g04006	Niben101Scf06909g04006	8.64342	8.2831	13.7608	34.4565	23.7989	49.7438	44.0726	18.9765	35.4992	10.2304	21.6191	9.57355	5.27e-05	1.1759	up	0.945486	-0.05401	normal	0.738888	-0.21111	normal	0.00824	0.896524	normal	0.156936	0.650735	normal	--	--	Molecular Function: transcription factor activity, sequence-specific DNA binding (GO:0003700);; Biological Process: regulation of transcription, DNA-templated (GO:0006355);; Molecular Function: sequence-specific DNA binding (GO:0043565);;	--	--	--	--	WRKY DNA -binding domain	Probable WRKY transcription factor 70 OS=Arabidopsis thaliana OX=3702 GN=WRKY70 PE=2 SV=1	K	Transcription	PREDICTED: probable WRKY transcription factor 70 [Nicotiana tomentosiformis]	biological process: biological regulation (GO:0065007);; molecular function: nucleic acid binding transcription factor activity (GO:0001071);; molecular function: binding (GO:0005488)
Niben101Ctg16115g00003	Niben101Ctg16115g00003	15.9707	14.1135	21.9445	11.0934	12.8064	10.232	49.7337	31.0148	39.0264	12.2766	22.2081	11.6546	0.000523	0.84627	normal	2.2e-17	1.74876	up	0.901844	0.090062	normal	0.000923	-0.80773	normal	5.56e-05	0.958644	normal	--	--	Molecular Function: transcription factor activity, sequence-specific DNA binding (GO:0003700);; Biological Process: regulation of transcription, DNA-templated (GO:0006355);; Molecular Function: sequence-specific DNA binding (GO:0043565);;	--	--	--	--	WRKY DNA -binding domain	Probable WRKY transcription factor 40 OS=Arabidopsis thaliana OX=3702 GN=WRKY40 PE=1 SV=1	K	Transcription	probable WRKY transcription factor 40 [Nicotiana tabacum]	biological process: biological regulation (GO:0065007);; molecular function: nucleic acid binding transcription factor activity (GO:0001071);; molecular function: binding (GO:0005488)
Niben101Scf01961g02007	Niben101Scf01961g02007	0.609917	0.138365	0.562702	0.584757	0.461116	0.26421	3.39597	2.0271	1.78103	0.561281	1.24911	0.418418	4.83e-05	1.45859	up	1.02e-07	1.91407	up	0.589603	-0.2715	normal	0.069599	-0.91867	normal	0.003714	1.05601	up	--	--	--	--	--	--	--	WRKY DNA -binding domain	WRKY transcription factor 6 OS=Arabidopsis thaliana OX=3702 GN=WRKY6 PE=1 SV=1	--	--	PREDICTED: WRKY transcription factor 6-like [Nicotiana sylvestris]	--
Niben101Scf02170g02011	Niben101Scf02170g02011	0.675576	0.176456	0.862976	0.158452	0.264033	0.20604	6.26691	2.03653	2.2688	0.671661	0.818224	0.441023	0.036679	0.899381	normal	2.38e-15	2.86275	up	0.922078	-0.085	normal	3.12e-05	-1.6943	down	4.68e-06	1.59238	up	--	--	--	--	--	--	--	WRKY DNA -binding domain	WRKY transcription factor 6 OS=Arabidopsis thaliana OX=3702 GN=WRKY6 PE=1 SV=1	K	Transcription	PREDICTED: WRKY transcription factor 6-like [Nicotiana sylvestris]	--
Niben101Scf00788g03016	Niben101Scf00788g03016	5.35068	3.81697	6.8039	4.51703	5.6762	7.0993	20.9884	12.4978	11.1904	8.60834	10.1579	6.08923	0.000852	1.01212	up	6.02e-05	1.24445	up	0.152394	-0.48418	normal	0.000989	-0.89513	normal	0.172107	0.450386	normal	--	--	Molecular Function: transcription factor activity, sequence-specific DNA binding (GO:0003700);; Biological Process: regulation of transcription, DNA-templated (GO:0006355);; Molecular Function: sequence-specific DNA binding (GO:0043565);;	--	--	--	--	WRKY DNA -binding domain;; Plant zinc cluster domain	Probable WRKY transcription factor 17 OS=Arabidopsis thaliana OX=3702 GN=WRKY17 PE=2 SV=2	K	Transcription	PREDICTED: probable WRKY transcription factor 11 [Nicotiana sylvestris]	biological process: biological regulation (GO:0065007);; molecular function: nucleic acid binding transcription factor activity (GO:0001071);; molecular function: binding (GO:0005488)
Niben101Scf01721g08007	Niben101Scf01721g08007	3.82701	2.20804	8.51947	3.19798	6.45516	3.37055	25.6624	12.0391	14.5934	3.22399	8.91113	3.10132	0.097036	0.769589	normal	7.3e-08	1.72984	up	0.984608	-0.01976	normal	0.20118	-0.55899	normal	0.040816	0.919489	normal	--	--	Molecular Function: transcription factor activity, sequence-specific DNA binding (GO:0003700);; Biological Process: regulation of transcription, DNA-templated (GO:0006355);; Molecular Function: sequence-specific DNA binding (GO:0043565);;	--	--	--	--	WRKY DNA -binding domain;; Plant zinc cluster domain	Probable WRKY transcription factor 11 OS=Arabidopsis thaliana OX=3702 GN=WRKY11 PE=2 SV=2	K	Transcription	PREDICTED: probable WRKY transcription factor 11 [Nicotiana sylvestris]	biological process: biological regulation (GO:0065007);; molecular function: nucleic acid binding transcription factor activity (GO:0001071);; molecular function: binding (GO:0005488)
Niben101Scf00788g03015	Niben101Scf00788g03015	9.2229	6.45132	11.5757	11.8552	9.5718	11.8503	35.4704	20.5918	21.6697	10.9816	15.8333	11.0691	5.72e-05	1.07925	up	1.55e-05	1.15778	up	0.183774	-0.4166	normal	0.006986	-0.57986	normal	0.008545	0.647462	normal	--	--	Molecular Function: DNA binding (GO:0003677);;	--	--	--	--	WRKY DNA -binding domain;; Plant zinc cluster domain	Probable WRKY transcription factor 11 OS=Arabidopsis thaliana OX=3702 GN=WRKY11 PE=2 SV=2	K	Transcription	PREDICTED: probable WRKY transcription factor 11 [Nicotiana tomentosiformis]	molecular function: binding (GO:0005488)
Niben101Scf03786g04014	Niben101Scf03786g04014	1.20631	0.997076	2.32221	0.80191	0.939376	1.0727	4.59698	2.34896	1.79409	1.48792	3.13799	1.94901	0.286114	0.495503	normal	0.000226	1.35264	up	0.476331	-0.3353	normal	3.78e-07	-1.49993	down	0.898357	0.075857	normal	--	--	--	--	--	--	--	WRKY DNA -binding domain	Probable WRKY transcription factor 31 OS=Arabidopsis thaliana OX=3702 GN=WRKY31 PE=2 SV=1	K	Transcription	PREDICTED: probable WRKY transcription factor 31 [Nicotiana attenuata]	--
Niben101Scf02145g09012	Niben101Scf02145g09012	1.74521	1.59227	2.34962	1.41568	2.25913	2.4337	10.9085	5.67683	7.25391	1.49266	3.60127	1.74167	1.15e-09	1.54802	up	2.64e-10	1.77168	up	0.746363	-0.19956	normal	0.163612	-0.52253	normal	1.11e-05	1.26832	up	--	--	Molecular Function: transcription factor activity, sequence-specific DNA binding (GO:0003700);; Biological Process: regulation of transcription, DNA-templated (GO:0006355);; Molecular Function: sequence-specific DNA binding (GO:0043565);;	--	--	--	--	WRKY DNA -binding domain	WRKY transcription factor 6 OS=Arabidopsis thaliana OX=3702 GN=WRKY6 PE=1 SV=1	K	Transcription	PREDICTED: probable WRKY transcription factor 31 isoform X2 [Nicotiana attenuata]	biological process: biological regulation (GO:0065007);; molecular function: nucleic acid binding transcription factor activity (GO:0001071);; molecular function: binding (GO:0005488)
Niben101Scf06976g06002	Niben101Scf06976g06002	0.845174	0.525382	4.14079	0.313089	0.667229	0.118483	10.3142	2.87103	4.58568	1.51572	5.28434	0.714758	0.43088	0.400173	normal	4.48e-10	2.4811	up	0.935153	-0.04569	normal	--	--	--	0.526401	0.364789	normal	--	--	--	--	--	--	--	WRKY DNA -binding domain	Probable WRKY transcription factor 40 OS=Arabidopsis thaliana OX=3702 GN=WRKY40 PE=1 SV=1	K	Transcription	PREDICTED: probable WRKY transcription factor 40 [Nicotiana sylvestris]	--
Niben101Scf00715g09001	Niben101Scf00715g09001	2.04411	0.352622	4.29657	0.578756	1.09416	0.338872	9.1405	4.43771	5.47126	2.29521	6.26168	4.00258	0.460617	0.392266	normal	8e-14	2.53483	up	0.791645	-0.12549	normal	2.06e-12	-2.62357	down	0.600463	0.238645	normal	--	--	Molecular Function: transcription factor activity, sequence-specific DNA binding (GO:0003700);; Biological Process: regulation of transcription, DNA-templated (GO:0006355);; Molecular Function: sequence-specific DNA binding (GO:0043565);;	--	--	--	--	WRKY DNA -binding domain	Probable WRKY transcription factor 40 OS=Arabidopsis thaliana OX=3702 GN=WRKY40 PE=1 SV=1	K	Transcription	PREDICTED: probable WRKY transcription factor 40 [Nicotiana tomentosiformis]	biological process: biological regulation (GO:0065007);; molecular function: nucleic acid binding transcription factor activity (GO:0001071);; molecular function: binding (GO:0005488)
Niben101Scf01977g00001	Niben101Scf01977g00001	3.15494	1.87795	5.72056	3.26557	4.01927	2.7299	13.6303	6.37478	9.03801	1.90004	3.89628	2.56254	0.167244	0.663324	normal	3.93e-06	1.3879	up	0.799115	0.176207	normal	0.709004	-0.14934	normal	5.73e-06	1.26838	up	--	--	--	--	--	--	--	WRKY DNA -binding domain	Probable WRKY transcription factor 41 OS=Arabidopsis thaliana OX=3702 GN=WRKY41 PE=2 SV=2	K	Transcription	PREDICTED: probable WRKY transcription factor 41 [Nicotiana sylvestris]	--
Niben101Scf00817g04005	Niben101Scf00817g04005	4.62638	1.99526	6.71243	1.66494	1.57711	1.58622	14.7962	6.84705	6.25797	4.22033	4.01305	4.02918	0.470763	0.412267	normal	3.67e-11	2.10838	up	0.980935	0.027812	normal	4.82e-13	-1.68127	down	0.03027	0.714051	normal	--	--	--	--	--	--	--	--	Probable WRKY transcription factor 41 OS=Arabidopsis thaliana OX=3702 GN=WRKY41 PE=2 SV=2	--	--	PREDICTED: probable WRKY transcription factor 41 [Nicotiana sylvestris]	--
Niben101Scf03985g04006	Niben101Scf03985g04006	1.00037	0.727531	2.93355	0.628964	0.845042	0.41709	4.63328	1.44763	1.54091	1.7017	4.31169	1.50213	0.701663	0.254206	normal	0.001821	1.3856	up	0.799734	-0.14143	normal	6.71e-07	-2.00202	down	0.745637	-0.19781	normal	--	--	--	--	--	--	--	WRKY DNA -binding domain	Probable WRKY transcription factor 53 OS=Arabidopsis thaliana OX=3702 GN=WRKY53 PE=1 SV=1	K	Transcription	PREDICTED: probable WRKY transcription factor 41 [Nicotiana sylvestris]	--
Niben101Scf08321g01005	Niben101Scf08321g01005	2.40263	1.38523	4.52658	1.20327	1.39285	0.718936	12.8146	6.35341	7.7434	0.963108	1.96412	1.17856	0.003195	1.05429	up	2.71e-17	2.54662	up	0.206356	0.484088	normal	0.119221	-0.64249	normal	9.15e-14	2.02927	up	--	--	--	--	--	--	--	WRKY DNA -binding domain	Probable WRKY transcription factor 41 OS=Arabidopsis thaliana OX=3702 GN=WRKY41 PE=2 SV=2	--	--	PREDICTED: probable WRKY transcription factor 41 [Nicotiana sylvestris]	--
Niben101Scf07063g00001	Niben101Scf07063g00001	4.49586	3.06064	7.67223	2.94702	3.59242	2.61668	10.8679	5.89258	5.7823	4.42029	8.1563	4.34326	0.651872	0.239861	normal	7.22e-05	1.1978	up	0.930733	-0.07749	normal	1.39e-06	-1.22792	down	0.867128	0.083001	normal	--	--	Molecular Function: transcription factor activity, sequence-specific DNA binding (GO:0003700);; Biological Process: regulation of transcription, DNA-templated (GO:0006355);; Molecular Function: sequence-specific DNA binding (GO:0043565);;	--	--	--	--	WRKY DNA -binding domain	Probable WRKY transcription factor 53 OS=Arabidopsis thaliana OX=3702 GN=WRKY53 PE=1 SV=1	K	Transcription	PREDICTED: probable WRKY transcription factor 53 [Nicotiana attenuata]	biological process: biological regulation (GO:0065007);; molecular function: nucleic acid binding transcription factor activity (GO:0001071);; molecular function: binding (GO:0005488)
MYB
Niben101Scf01623g12020	Niben101Scf01623g12020	2.75799	2.0514	1.17874	1.92726	5.11484	2.07728	1.4487	0.855561	1.76274	0.668702	1.09184	1.08823	0.147965	-0.59632	normal	0.096249	-0.79418	normal	0.11872	0.545826	normal	0.010037	1.04812	up	0.80273	0.13917	normal	--	--	Molecular Function: DNA binding (GO:0003677);; Biological Process: phenylpropanoid biosynthetic process (GO:0009699);; Biological Process: positive regulation of flavonoid biosynthetic process (GO:0009963);;	K09422|2.29405e-123|sot:102605418|K09422 myb proto-oncogene protein, plant | (RefSeq) transcription factor MYB12	--	[K]	Transcription	Myb-like DNA-binding domain;; Myb-like DNA-binding domain	Transcription factor MYB111 OS=Arabidopsis thaliana OX=3702 GN=MYB111 PE=1 SV=1	K	Transcription	PREDICTED: transcription factor MYB12-like [Nicotiana attenuata]	molecular function: binding (GO:0005488);; biological process: metabolic process (GO:0008152);; biological process: cellular process (GO:0009987);; biological process: single-organism process (GO:0044699);; biological process: biological regulation (GO:0065007)
Niben101Scf01887g01001	Niben101Scf01887g01001	1.84932	1.56295	2.74368	1.84718	2.26074	1.74765	9.43212	6.94156	7.19646	1.38082	1.47506	0.844714	3.64e-07	1.39689	up	1.9e-13	1.84646	up	0.491612	0.330802	normal	0.677126	0.211617	normal	1.39e-14	2.01584	up	--	--	Molecular Function: DNA binding (GO:0003677);;	--	--	[K]	Transcription	Myb-like DNA-binding domain;; Myb-like DNA-binding domain;; SLIDE	Transcription factor MYB73 OS=Arabidopsis thaliana OX=3702 GN=MYB73 PE=1 SV=1	K	Transcription	PREDICTED: transcription factor MYB44-like [Nicotiana attenuata]	molecular function: binding (GO:0005488)
Niben101Scf05363g02005	Niben101Scf05363g02005	1.5953	0.666493	1.75619	0.416584	0.700367	0.73725	6.39537	2.43116	3.2993	0.413056	0.406451	0.308609	0.019435	0.922755	normal	1.39e-08	2.06737	up	--	--	--	--	--	--	1.17e-11	2.26844	up	--	--	--	--	--	[K]	Transcription	Myb-like DNA-binding domain;; Myb-like DNA-binding domain;; SLIDE	Transcription factor MYB73 OS=Arabidopsis thaliana OX=3702 GN=MYB73 PE=1 SV=1	K	Transcription	PREDICTED: transcription factor MYB44-like [Nicotiana attenuata]	--
Niben101Scf01555g04002	Niben101Scf01555g04002	12.6888	10.0326	13.6554	6.31866	9.26743	7.54678	12.419	8.49498	13.0697	17.8337	17.1674	15.9344	0.314937	-0.31453	normal	0.053165	0.57899	normal	0.040016	-0.47454	normal	1.59e-17	-1.53533	down	1.52e-05	-0.8672	normal	--	--	Molecular Function: DNA binding (GO:0003677);;	K09422|5.28366e-149|spen:107015612|K09422 myb proto-oncogene protein, plant | (RefSeq) transcription factor MYB44-like	--	[K]	Transcription	Myb-like DNA-binding domain;; Myb-like DNA-binding domain	Transcription factor MYB73 OS=Arabidopsis thaliana OX=3702 GN=MYB73 PE=1 SV=1	K	Transcription	PREDICTED: transcription factor MYB44-like [Nicotiana sylvestris]	molecular function: binding (GO:0005488)
Niben101Scf39382g00003	Niben101Scf39382g00003	36.3295	29.5957	35.9321	18.6741	16.0929	28.3856	51.0503	38.3229	24.0555	35.2058	33.5563	45.6764	0.878711	-0.07913	normal	0.035973	0.780466	normal	0.576038	-0.21135	normal	1.74e-06	-1.22125	down	0.349363	-0.31843	normal	--	--	Molecular Function: DNA binding (GO:0003677);;	K09422|2.89406e-45|spen:107003095|K09422 myb proto-oncogene protein, plant | (RefSeq) transcription factor MYB48	--	[K]	Transcription	Myb-like DNA-binding domain;; Myb-like DNA-binding domain	Transcription factor MYB59 OS=Arabidopsis thaliana OX=3702 GN=MYB59 PE=2 SV=2	K	Transcription	PREDICTED: transcription factor MYB48-like [Nicotiana attenuata]	molecular function: binding (GO:0005488)
Niben101Scf05676g03004	Niben101Scf05676g03004	1.86257	1.02729	1.65513	0.933017	0.512778	0.924356	2.34256	2.43757	1.40356	0.947403	1.83554	2.85558	0.810547	0.148923	normal	0.00853	1.09571	up	0.771902	-0.19272	normal	0.001755	-1.3726	down	0.778075	-0.16287	normal	--	--	Molecular Function: DNA binding (GO:0003677);;	K09422|2.44892e-120|spen:107021404|K09422 myb proto-oncogene protein, plant | (RefSeq) transcription factor MYB48-like	--	[K]	Transcription	Myb-like DNA-binding domain;; Myb-like DNA-binding domain	Myb-related protein MYBAS2 OS=Oryza sativa subsp. japonica OX=39947 GN=MYBAS2 PE=2 SV=1	K	Transcription	PREDICTED: transcription factor MYB48-like [Nicotiana sylvestris]	molecular function: binding (GO:0005488)
Niben101Ctg15252g00002	Niben101Ctg15252g00002	95.8698	74.4411	78.8008	47.1587	42.6514	69.2327	119.533	80.9998	61.4353	85.3101	84.0818	121.264	0.729669	-0.15088	normal	0.055064	0.690067	normal	0.476839	-0.25519	normal	8.55e-07	-1.23674	down	0.148684	-0.44293	normal	--	--	--	K09422|4.53051e-31|spen:107003095|K09422 myb proto-oncogene protein, plant | (RefSeq) transcription factor MYB48	--	--	--	--	--	K	Transcription	PREDICTED: transcription factor MYB48-like [Nicotiana tabacum]	--
Niben101Scf00522g01017	Niben101Scf00522g01017	2.88776	0.780195	3.00624	0.636895	0.427859	0.982892	12.6747	6.07726	5.81045	1.69314	7.99349	1.69672	0.093246	0.775949	normal	2.79e-18	2.8379	up	0.818205	-0.11985	normal	0.001826	-1.74769	down	0.505265	0.388497	normal	--	--	Molecular Function: DNA binding (GO:0003677);;	K09422|2.16499e-77|sot:102589612|K09422 myb proto-oncogene protein, plant | (RefSeq) myb-related protein 305-like	--	[K]	Transcription	Myb-like DNA-binding domain;; Myb-like DNA-binding domain	Transcription factor MYB62 OS=Arabidopsis thaliana OX=3702 GN=MYB62 PE=2 SV=1	K	Transcription	PREDICTED: transcription factor MYB57-like [Nicotiana sylvestris]	molecular function: binding (GO:0005488)
Niben101Scf10124g03001	Niben101Scf10124g03001	0.345499	0.491808	0.222155	1.04179	2.12268	1.00752	0.643398	0.444956	0.839101	0.509759	0.269587	0.169496	0.432745	0.411474	normal	0.095571	-0.77635	normal	--	--	--	0.003138	1.34548	up	0.388486	0.446974	normal	--	--	Molecular Function: DNA binding (GO:0003677);; Cellular Component: nucleus (GO:0005634);; Biological Process: trichome differentiation (GO:0010026);; Biological Process: positive regulation of transcription, DNA-templated (GO:0045893);;	K09422|1.18404e-134|sot:102584003|K09422 myb proto-oncogene protein, plant | (RefSeq) TSF; transcription factor MYB82-like	--	[K]	Transcription	Myb-like DNA-binding domain;; Myb-like DNA-binding domain	Transcription factor MYB82 OS=Arabidopsis thaliana OX=3702 GN=MYB82 PE=1 SV=1	K	Transcription	PREDICTED: transcription factor MYB82-like [Nicotiana attenuata]	molecular function: binding (GO:0005488);; cellular component: cell (GO:0005623);; cellular component: organelle (GO:0043226);; cellular component: cell part (GO:0044464);; biological process: cellular process (GO:0009987);; biological process: developmental process (GO:0032502);; biological process: single-organism process (GO:0044699);; biological process: biological regulation (GO:0065007)
Niben101Scf09353g06003	Niben101Scf09353g06003	0.861551	2.96205	1.01017	2.9513	3.85617	3.97695	0.324685	0.638293	1.03829	0.635293	0.439478	0.531215	0.030928	-0.91611	normal	2.05e-08	-1.87206	down	0.048397	0.628201	normal	1.1e-14	2.12409	up	0.97282	-0.02642	normal	--	--	Molecular Function: DNA binding (GO:0003677);;	K09422|0|sot:102599422|K09422 myb proto-oncogene protein, plant | (RefSeq) myb-related protein 330-like	--	[K]	Transcription	Myb-like DNA-binding domain;; Myb-like DNA-binding domain	Transcription factor MYB61 OS=Arabidopsis thaliana OX=3702 GN=MYB61 PE=2 SV=1	K	Transcription	PREDICTED: transcription factor MYB86-like [Nicotiana attenuata]	molecular function: binding (GO:0005488)
Niben101Scf25721g00003	Niben101Scf25721g00003	0.145322	0.573283	0.070072	0.877566	1.25142	0.406348	0	0	0.23236	0.078967	0	0.039316	--	--	--	0.497639	-0.29657	normal	--	--	--	7.07e-07	2.54125	up	--	--	--	--	--	Molecular Function: DNA binding (GO:0003677);;	K09422|2.81719e-162|sot:102599422|K09422 myb proto-oncogene protein, plant | (RefSeq) myb-related protein 330-like	--	[K]	Transcription	Myb-like DNA-binding domain;; Myb-like DNA-binding domain	Transcription factor MYB61 OS=Arabidopsis thaliana OX=3702 GN=MYB61 PE=2 SV=1	K	Transcription	PREDICTED: transcription factor MYB86-like [Nicotiana attenuata]	molecular function: binding (GO:0005488)
Niben101Scf07645g04006	Niben101Scf07645g04006	2.96272	2.51049	3.27039	1.68028	0.844653	0.881379	2.8906	2.09555	2.34247	3.38566	3.14124	4.09503	0.064041	-0.4625	normal	0.007633	0.967094	normal	0.38077	-0.29586	normal	6.39e-10	-1.87658	down	0.000103	-0.81973	normal	--	--	--	--	--	--	--	Myb-like DNA-binding domain	Myb-related protein 2 OS=Arabidopsis thaliana OX=3702 GN=MYR2 PE=1 SV=1	K	Transcription	PREDICTED: myb-related protein 2-like isoform X2 [Nicotiana tomentosiformis]	--
Niben101Scf04632g00008	Niben101Scf04632g00008	3.73322	3.76504	3.45674	2.37012	1.24507	1.3508	3.82881	2.0023	2.06446	3.99922	2.88123	3.6048	0.062333	-0.60691	normal	0.261187	0.563705	normal	0.987422	-0.01773	normal	5.29e-05	-1.35209	down	0.048851	-0.64966	normal	--	--	--	--	--	--	--	MYB-CC type transfactor, LHEQLE motif;; Myb-like DNA-binding domain	Myb-related protein 1 OS=Arabidopsis thaliana OX=3702 GN=MYR1 PE=1 SV=1	K	Transcription	PREDICTED: myb-related protein 2-like isoform X3 [Nicotiana attenuata]	--
Niben101Scf01658g01010	Niben101Scf01658g01010	0.442485	0.559529	0.305931	0.389081	2.56414	0.438605	0.120183	0.407632	0.402972	0.325076	0.204825	0.286853	0.337625	-0.48151	normal	0.091044	-0.92306	normal	0.581745	0.288631	normal	0.042122	1.11451	up	0.867775	-0.11446	normal	--	--	Molecular Function: DNA binding (GO:0003677);;	--	--	[K]	Transcription	Myb-like DNA-binding domain;; Myb-like DNA-binding domain	Transcription factor MYB3R-1 OS=Arabidopsis thaliana OX=3702 GN=MYB3R1 PE=2 SV=1	K	Transcription	PREDICTED: myb-related protein 3R-1-like [Nicotiana tabacum]	molecular function: binding (GO:0005488)
Niben101Scf03570g04002	Niben101Scf03570g04002	1.25829	1.00422	1.85027	1.43369	1.97925	1.60467	3.20708	2.77583	3.74869	1.18846	1.44292	0.751748	0.013246	0.804816	normal	0.001615	0.92445	normal	0.894558	0.112122	normal	0.818375	0.117198	normal	0.000531	1.01763	up	--	--	Molecular Function: DNA binding (GO:0003677);;	K09422|5.6913e-124|spen:107021732|K09422 myb proto-oncogene protein, plant | (RefSeq) myb-related protein Myb4-like	--	[K]	Transcription	Myb-like DNA-binding domain;; Myb-like DNA-binding domain	Transcription factor MYB15 OS=Arabidopsis thaliana OX=3702 GN=MYB15 PE=1 SV=1	K	Transcription	PREDICTED: myb-related protein Myb4-like [Nicotiana attenuata]	molecular function: binding (GO:0005488)
Niben101Scf04819g00002	Niben101Scf04819g00002	0.638871	1.14469	0.384613	4.90341	3.27523	4.83117	2.07615	0.871912	2.65664	0.381556	0.548225	0.527915	0.124784	0.698101	normal	0.042645	-0.88831	normal	--	--	--	4.82e-14	2.42952	up	0.003575	1.13241	up	--	--	Molecular Function: DNA binding (GO:0003677);;	K09422|6.80937e-90|sot:102592639|K09422 myb proto-oncogene protein, plant | (RefSeq) transcription factor MYB12-like	--	[K]	Transcription	Myb-like DNA-binding domain;; Myb-like DNA-binding domain	Transcription factor MYB111 OS=Arabidopsis thaliana OX=3702 GN=MYB111 PE=1 SV=1	K	Transcription	PREDICTED: myb-related protein Myb4-like [Nicotiana attenuata]	molecular function: binding (GO:0005488)
Niben101Scf01013g01003	Niben101Scf01013g01003	1.33428	0.483437	2.97859	0.440705	0.88017	0.168393	5.21602	1.98587	2.23144	0.454885	2.36016	0.812505	0.675721	0.268464	normal	3.88e-05	1.74699	up	0.930089	0.056354	normal	0.028014	-1.20086	down	0.344302	0.512361	normal	--	--	--	K09422|8.79677e-113|sot:102600950|K09422 myb proto-oncogene protein, plant | (RefSeq) myb-related protein Myb4-like	--	[K]	Transcription	Myb-like DNA-binding domain;; Myb-like DNA-binding domain;; SLIDE	Transcription factor MYB15 OS=Arabidopsis thaliana OX=3702 GN=MYB15 PE=1 SV=1	K	Transcription	PREDICTED: myb-related protein Myb4-like [Nicotiana sylvestris]	--
Niben101Scf01333g00011	Niben101Scf01333g00011	1.79901	2.18612	2.22126	2.51578	2.47908	1.39539	2.74055	2.93553	2.1762	3.15493	2.82161	5.3807	0.88287	0.077913	normal	0.544467	0.30999	normal	0.041315	-0.61992	normal	0.001645	-1.13202	down	0.017101	-0.7549	normal	--	--	Molecular Function: DNA binding (GO:0003677);; Cellular Component: nucleus (GO:0005634);; Biological Process: regulation of transcription, DNA-templated (GO:0006355);;	--	--	--	--	MYB-CC type transfactor, LHEQLE motif	Protein PHR1-LIKE 3 OS=Arabidopsis thaliana OX=3702 GN=PHL3 PE=1 SV=1	K	Transcription	PREDICTED: myb family transcription factor APL-like [Nicotiana sylvestris]	molecular function: binding (GO:0005488);; cellular component: cell (GO:0005623);; cellular component: organelle (GO:0043226);; cellular component: cell part (GO:0044464);; biological process: biological regulation (GO:0065007)
Niben101Scf03300g02006	Niben101Scf03300g02006	2.75558	1.80016	2.48598	4.75824	7.15862	7.86156	4.14402	6.93589	4.29688	1.12767	1.85733	1.6442	0.01384	0.74444	normal	0.60091	-0.24814	normal	0.396149	0.355266	normal	1.07e-09	1.55519	up	5.78e-06	1.21683	up	--	--	Molecular Function: DNA binding (GO:0003677);; Cellular Component: nucleus (GO:0005634);; Biological Process: regulation of transcription, DNA-templated (GO:0006355);;	--	--	--	--	Myb-like DNA-binding domain	Myb family transcription factor EFM OS=Arabidopsis thaliana OX=3702 GN=EFM PE=1 SV=2	K	Transcription	PREDICTED: myb family transcription factor EFM-like [Nicotiana attenuata]	molecular function: binding (GO:0005488);; cellular component: cell (GO:0005623);; cellular component: organelle (GO:0043226);; cellular component: cell part (GO:0044464);; biological process: biological regulation (GO:0065007)
Niben101Scf02066g03007	Niben101Scf02066g03007	3.08353	1.67603	1.58459	2.74497	5.43656	3.73066	4.01541	3.48874	6.54231	1.81204	1.34303	0.953347	0.047159	0.716305	normal	0.61266	0.27212	normal	0.588731	0.285565	normal	0.007808	0.968709	normal	0.0002	1.17857	up	--	--	Molecular Function: DNA binding (GO:0003677);;	K09422|8.17879e-51|sind:105157053|K09422 myb proto-oncogene protein, plant | (RefSeq) transcription factor MYB12	--	[K]	Transcription	Myb-like DNA-binding domain;; Myb-like DNA-binding domain	Myb-related protein P OS=Zea mays OX=4577 GN=P PE=2 SV=1	K	Transcription	PREDICTED: transcription repressor MYB4-like isoform X2 [Nicotiana attenuata]	molecular function: binding (GO:0005488)
NAC
Niben101Scf04099g08003	Niben101Scf04099g08003	4.86935	2.72397	4.86901	6.55142	7.19067	9.21357	22.4367	15.4474	18.2091	3.39963	3.38663	3.33451	2.25e-13	1.69029	up	2.86e-09	1.26722	up	0.767047	0.168306	normal	0.000279	0.720645	normal	8.42e-33	2.01143	up	--	--	Molecular Function: DNA binding (GO:0003677);; Cellular Component: nucleus (GO:0005634);; Biological Process: regulation of transcription, DNA-templated (GO:0006355);; Cellular Component: integral component of membrane (GO:0016021);;	--	--	--	--	No apical meristem (NAM) protein	NAC domain-containing protein 62 OS=Arabidopsis thaliana OX=3702 GN=NAC062 PE=1 SV=1	S	Function unknown	PREDICTED: NAC domain-containing protein 14-like [Nicotiana attenuata]	molecular function: binding (GO:0005488);; cellular component: cell (GO:0005623);; cellular component: organelle (GO:0043226);; cellular component: cell part (GO:0044464);; biological process: biological regulation (GO:0065007);; cellular component: membrane (GO:0016020);; cellular component: membrane part (GO:0044425)
Niben101Scf27945g00015	Niben101Scf27945g00015	4.2762	3.239	4.18448	7.25862	5.97299	7.40893	12.8524	8.32356	10.3227	2.61576	3.17034	2.39559	3.84e-07	1.0736	up	0.023315	0.62322	normal	0.23109	0.362791	normal	1.49e-05	0.883609	normal	4.03e-15	1.50237	up	--	--	Molecular Function: DNA binding (GO:0003677);; Cellular Component: nucleus (GO:0005634);; Biological Process: regulation of transcription, DNA-templated (GO:0006355);; Cellular Component: integral component of membrane (GO:0016021);;	--	--	--	--	No apical meristem (NAM) protein	NAC domain-containing protein 62 OS=Arabidopsis thaliana OX=3702 GN=NAC062 PE=1 SV=1	S	Function unknown	PREDICTED: NAC domain-containing protein 14-like [Nicotiana attenuata]	molecular function: binding (GO:0005488);; cellular component: cell (GO:0005623);; cellular component: organelle (GO:0043226);; cellular component: cell part (GO:0044464);; biological process: biological regulation (GO:0065007);; cellular component: membrane (GO:0016020);; cellular component: membrane part (GO:0044425)
Niben101Scf39126g00010	Niben101Scf39126g00010	0.621543	0.65601	0.361505	0.882854	0.909194	0.926084	0.191027	0.281287	0.742091	0.278385	0.258187	0.091213	--	--	--	0.241432	-0.67248	normal	--	--	--	0.01085	1.28061	up	--	--	--	--	--	--	--	--	--	--	No apical meristem (NAM) protein	Protein CUP-SHAPED COTYLEDON 2 OS=Arabidopsis thaliana OX=3702 GN=NAC098 PE=1 SV=1	--	--	PREDICTED: NAC domain-containing protein 21/22-like [Nicotiana attenuata]	--
Niben101Scf12245g00002	Niben101Scf12245g00002	0.096553	0.17519	0.955065	0.108034	0.212465	0.971014	1.15945	0.343132	0.408095	0.888895	1.38808	1.06722	--	--	--	--	--	--	0.262281	-0.40956	normal	0.023151	-1.25205	down	0.066949	-0.79174	normal	--	--	Molecular Function: DNA binding (GO:0003677);; Cellular Component: nucleus (GO:0005634);; Biological Process: regulation of transcription, DNA-templated (GO:0006355);;	--	--	--	--	No apical meristem (NAM) protein	NAC domain-containing protein 21/22 OS=Arabidopsis thaliana OX=3702 GN=NAC021 PE=1 SV=2	S	Function unknown	PREDICTED: NAC domain-containing protein 21/22-like [Nicotiana sylvestris]	molecular function: binding (GO:0005488);; cellular component: cell (GO:0005623);; cellular component: organelle (GO:0043226);; cellular component: cell part (GO:0044464);; biological process: biological regulation (GO:0065007)
Niben101Scf00799g00011	Niben101Scf00799g00011	18.7063	16.0719	12.3579	13.438	16.2896	15.8126	36.6184	26.1833	34.9266	12.5562	15.9382	11.5299	0.000272	0.748438	normal	2.5e-09	1.1139	up	0.786444	0.134411	normal	0.223393	-0.23809	normal	3.44e-07	0.902751	normal	--	--	Molecular Function: DNA binding (GO:0003677);; Cellular Component: nucleus (GO:0005634);; Biological Process: regulation of transcription, DNA-templated (GO:0006355);; Biological Process: negative regulation of abscisic acid-activated signaling pathway (GO:0009788);;	--	--	--	--	No apical meristem (NAM) protein	NAC domain-containing protein 2 OS=Arabidopsis thaliana OX=3702 GN=NAC002 PE=2 SV=2	S	Function unknown	PREDICTED: NAC domain-containing protein 2-like isoform X1 [Nicotiana tabacum]	molecular function: binding (GO:0005488);; cellular component: cell (GO:0005623);; cellular component: organelle (GO:0043226);; cellular component: cell part (GO:0044464);; biological process: biological regulation (GO:0065007)
Niben101Scf03028g01011	Niben101Scf03028g01011	11.8212	8.55739	8.55185	8.88363	8.72151	10.7714	27.7355	16.2271	23.4144	9.52563	11.2025	5.36235	0.000189	0.875702	normal	7.49e-07	1.20147	up	0.947109	0.056635	normal	0.40278	-0.28061	normal	0.000585	0.918576	normal	--	--	Molecular Function: DNA binding (GO:0003677);; Cellular Component: nucleus (GO:0005634);; Biological Process: regulation of transcription, DNA-templated (GO:0006355);; Biological Process: negative regulation of abscisic acid-activated signaling pathway (GO:0009788);;	--	--	--	--	No apical meristem (NAM) protein	NAC domain-containing protein 2 OS=Arabidopsis thaliana OX=3702 GN=NAC002 PE=2 SV=2	S	Function unknown	PREDICTED: NAC domain-containing protein 2-like isoform X1 [Nicotiana tabacum]	molecular function: binding (GO:0005488);; cellular component: cell (GO:0005623);; cellular component: organelle (GO:0043226);; cellular component: cell part (GO:0044464);; biological process: biological regulation (GO:0065007)
Niben101Scf06862g00001	Niben101Scf06862g00001	3.15544	3.65662	3.23825	2.93023	1.88122	2.66193	2.46894	2.86259	3.37943	3.9506	4.10193	4.15035	0.129853	-0.41174	normal	0.597862	0.247522	normal	0.37999	-0.29472	normal	3.67e-05	-1.0631	down	0.000251	-0.76973	normal	--	--	--	--	--	--	--	No apical meristem (NAM) protein	NAC domain-containing protein 35 OS=Arabidopsis thaliana OX=3702 GN=NAC035 PE=1 SV=2	S	Function unknown	PREDICTED: NAC domain-containing protein 35-like isoform X1 [Nicotiana tomentosiformis]	--
Niben101Scf11508g01003	Niben101Scf11508g01003	0.557815	0.556997	0.569151	0.652375	0.455769	0.345886	0.157331	0.185165	0.370207	0.488595	0.800794	0.896327	0.017877	-0.95497	normal	--	--	--	0.678846	-0.24287	normal	0.052849	-0.85506	normal	0.000282	-1.36708	down	--	--	Biological Process: transcription, DNA-templated (GO:0006351);;	--	--	--	--	No apical meristem (NAM) protein	NAC domain-containing protein 35 OS=Arabidopsis thaliana OX=3702 GN=NAC035 PE=1 SV=2	S	Function unknown	PREDICTED: NAC domain-containing protein 35-like isoform X1 [Nicotiana tomentosiformis]	biological process: metabolic process (GO:0008152);; biological process: cellular process (GO:0009987)
Niben101Scf00109g02027	Niben101Scf00109g02027	0.11505	0.033228	0.486521	0.25018	0.388262	0.163759	3.31191	1.00065	1.05678	0.809853	0.447197	0.127464	0.002782	1.21083	up	5.34e-05	1.73977	up	--	--	--	--	--	--	0.036589	0.947043	normal	--	--	Biological Process: transcription, DNA-templated (GO:0006351);;	--	--	--	--	No apical meristem (NAM) protein	NAC domain-containing protein 83 OS=Arabidopsis thaliana OX=3702 GN=NAC083 PE=1 SV=1	S	Function unknown	PREDICTED: NAC domain-containing protein 68-like isoform X2 [Nicotiana sylvestris]	biological process: metabolic process (GO:0008152);; biological process: cellular process (GO:0009987)
Niben101Ctg15807g00002	Niben101Ctg15807g00002	22.0385	12.0897	11.7582	9.69104	6.67356	25.1755	8.60826	4.56003	8.41504	13.9337	14.3833	14.198	0.000126	-1.10558	down	0.221635	-0.64032	normal	0.985715	0.019085	normal	0.380472	-0.40741	normal	1.82e-07	-1.19795	down	--	--	Molecular Function: (R,R)-butanediol dehydrogenase activity (GO:0000721);; Molecular Function: DNA binding (GO:0003677);; Cellular Component: nucleus (GO:0005634);; Biological Process: regulation of transcription, DNA-templated (GO:0006355);; Biological Process: oxidation-reduction process (GO:0055114);;	--	--	--	--	No apical meristem (NAM) protein	NAC domain-containing protein 72 OS=Arabidopsis thaliana OX=3702 GN=NAC072 PE=2 SV=1	K	Transcription	PREDICTED: NAC domain-containing protein 72-like [Nicotiana tomentosiformis]	biological process: metabolic process (GO:0008152);; biological process: single-organism process (GO:0044699);; molecular function: catalytic activity (GO:0003824);; molecular function: binding (GO:0005488);; cellular component: cell (GO:0005623);; cellular component: organelle (GO:0043226);; cellular component: cell part (GO:0044464);; biological process: biological regulation (GO:0065007)
Niben101Scf14516g00017	Niben101Scf14516g00017	22.7515	12.387	11.9389	10.0883	6.84865	25.6817	8.92759	6.61991	8.76393	14.4769	14.9691	14.7135	6.96e-05	-1.03539	down	0.283349	-0.5607	normal	0.996109	0.004239	normal	0.353886	-0.42488	normal	4.35e-11	-1.14144	down	--	--	Molecular Function: (R,R)-butanediol dehydrogenase activity (GO:0000721);; Molecular Function: DNA binding (GO:0003677);; Cellular Component: nucleus (GO:0005634);; Biological Process: regulation of transcription, DNA-templated (GO:0006355);; Biological Process: oxidation-reduction process (GO:0055114);;	--	--	--	--	No apical meristem (NAM) protein	NAC domain-containing protein 72 OS=Arabidopsis thaliana OX=3702 GN=NAC072 PE=2 SV=1	K	Transcription	PREDICTED: NAC domain-containing protein 72-like [Nicotiana tomentosiformis]	biological process: metabolic process (GO:0008152);; biological process: single-organism process (GO:0044699);; molecular function: catalytic activity (GO:0003824);; molecular function: binding (GO:0005488);; cellular component: cell (GO:0005623);; cellular component: organelle (GO:0043226);; cellular component: cell part (GO:0044464);; biological process: biological regulation (GO:0065007)
Niben101Scf14516g00019	Niben101Scf14516g00019	22.7551	13.1585	12.1334	10.2568	6.97259	2.05091	9.25013	6.48894	8.8059	14.5529	15.122	15.3545	3.62e-05	-1.05361	down	0.677737	0.286065	normal	0.995301	0.006361	normal	0.041457	-1.14606	down	1.82e-10	-1.14831	down	--	--	Molecular Function: (R,R)-butanediol dehydrogenase activity (GO:0000721);; Molecular Function: DNA binding (GO:0003677);; Cellular Component: nucleus (GO:0005634);; Biological Process: regulation of transcription, DNA-templated (GO:0006355);; Biological Process: oxidation-reduction process (GO:0055114);;	--	--	--	--	No apical meristem (NAM) protein	NAC domain-containing protein 72 OS=Arabidopsis thaliana OX=3702 GN=NAC072 PE=2 SV=1	K	Transcription	PREDICTED: NAC domain-containing protein 72-like [Nicotiana tomentosiformis]	biological process: metabolic process (GO:0008152);; biological process: single-organism process (GO:0044699);; molecular function: catalytic activity (GO:0003824);; molecular function: binding (GO:0005488);; cellular component: cell (GO:0005623);; cellular component: organelle (GO:0043226);; cellular component: cell part (GO:0044464);; biological process: biological regulation (GO:0065007)
Niben101Scf11552g02001	Niben101Scf11552g02001	1.0673	1.17266	1.16747	5.6762	4.40111	5.56535	1.7102	1.33352	3.21849	0.485685	0.615663	0.971136	0.255241	0.482351	normal	0.003704	-1.04478	down	0.46127	0.34579	normal	8.85e-15	2.27034	up	0.010972	0.951013	normal	--	--	Molecular Function: DNA binding (GO:0003677);; Cellular Component: nucleus (GO:0005634);; Biological Process: positive regulation of transcription, DNA-templated (GO:0045893);; Biological Process: regulation of secondary cell wall biogenesis (GO:2000652);;	--	--	--	--	No apical meristem (NAM) protein	NAC domain-containing protein 73 OS=Arabidopsis thaliana OX=3702 GN=NAC073 PE=2 SV=1	S	Function unknown	PREDICTED: NAC domain-containing protein 73-like isoform X2 [Nicotiana attenuata]	molecular function: binding (GO:0005488);; cellular component: cell (GO:0005623);; cellular component: organelle (GO:0043226);; cellular component: cell part (GO:0044464);; biological process: biological regulation (GO:0065007)
Niben101Scf02108g01025	Niben101Scf02108g01025	0.652564	1.03167	0.679657	2.40272	1.78144	1.10997	0.574233	0.761549	1.74545	0.244827	0.413793	0.559831	--	--	--	0.42202	-0.49055	normal	--	--	--	0.003037	1.34483	up	--	--	--	--	--	Molecular Function: DNA binding (GO:0003677);; Cellular Component: nucleus (GO:0005634);; Biological Process: regulation of transcription, DNA-templated (GO:0006355);;	--	--	--	--	No apical meristem (NAM) protein	NAC domain-containing protein 86 OS=Arabidopsis thaliana OX=3702 GN=NAC086 PE=2 SV=1	S	Function unknown	PREDICTED: NAC domain-containing protein 74 isoform X2 [Nicotiana sylvestris]	molecular function: binding (GO:0005488);; cellular component: cell (GO:0005623);; cellular component: organelle (GO:0043226);; cellular component: cell part (GO:0044464);; biological process: biological regulation (GO:0065007)
Niben101Scf04664g01015	Niben101Scf04664g01015	1.09047	2.02197	1.91437	7.23099	6.77638	5.56793	4.77672	2.63047	6.08051	1.88811	1.88941	1.36495	0.038938	0.82146	normal	0.456238	-0.37989	normal	0.967202	-0.04142	normal	1.4e-05	1.36359	up	0.028619	0.822927	normal	--	--	Biological Process: transcription, DNA-templated (GO:0006351);;	--	--	--	--	No apical meristem (NAM) protein	NAC domain-containing protein 30 OS=Arabidopsis thaliana OX=3702 GN=NAC030 PE=1 SV=1	--	--	PREDICTED: NAC domain-containing protein 78-like [Nicotiana sylvestris]	biological process: metabolic process (GO:0008152);; biological process: cellular process (GO:0009987)
Niben101Scf02433g00011	Niben101Scf02433g00011	0.480444	0.639744	0.163231	0.622825	0.609273	0.66284	0.221204	0.371577	0.695641	0.145698	0.207803	0.253879	0.861732	-0.13247	normal	0.592477	-0.3473	normal	--	--	--	0.018662	1.0126	up	--	--	--	--	--	Molecular Function: DNA binding (GO:0003677);; Cellular Component: nucleus (GO:0005634);; Biological Process: regulation of transcription, DNA-templated (GO:0006355);;	--	--	--	--	No apical meristem (NAM) protein	NAC domain-containing protein 86 OS=Arabidopsis thaliana OX=3702 GN=NAC086 PE=2 SV=1	S	Function unknown	PREDICTED: NAC domain-containing protein 78-like [Nicotiana sylvestris]	molecular function: binding (GO:0005488);; cellular component: cell (GO:0005623);; cellular component: organelle (GO:0043226);; cellular component: cell part (GO:0044464);; biological process: biological regulation (GO:0065007)
Niben101Scf04217g02012	Niben101Scf04217g02012	1.11603	1.07602	1.2843	2.95244	2.78193	3.33285	1.81942	1.80878	2.50598	0.451205	0.460333	0.604276	0.179088	0.480332	normal	0.223891	-0.43697	normal	0.087424	0.581479	normal	6.25e-11	1.95597	up	6.68e-06	1.37782	up	--	--	Molecular Function: DNA binding (GO:0003677);; Biological Process: regulation of transcription, DNA-templated (GO:0006355);; Biological Process: xylem development (GO:0010089);; Cellular Component: cell part (GO:0044464);; Biological Process: single-organism process (GO:0044699);;	--	--	--	--	No apical meristem (NAM) protein	NAC domain-containing protein 7 OS=Arabidopsis thaliana OX=3702 GN=NAC007 PE=1 SV=2	S	Function unknown	PREDICTED: NAC domain-containing protein 7-like [Nicotiana attenuata]	molecular function: binding (GO:0005488);; biological process: biological regulation (GO:0065007);; biological process: developmental process (GO:0032502);; cellular component: cell part (GO:0044464);; biological process: single-organism process (GO:0044699)
Niben101Scf02420g03014	Niben101Scf02420g03014	0.992425	0.681354	0.532651	6.43385	6.28812	8.64578	3.12744	2.5128	6.19544	0.419581	0.561842	0.654552	4.55e-06	1.54324	up	0.134615	-0.64515	normal	--	--	--	6.89e-25	2.97704	up	1.42e-08	1.89339	up	--	--	Molecular Function: DNA binding (GO:0003677);; Biological Process: regulation of transcription, DNA-templated (GO:0006355);; Biological Process: xylem development (GO:0010089);; Cellular Component: cell part (GO:0044464);; Biological Process: single-organism process (GO:0044699);;	--	--	--	--	No apical meristem (NAM) protein	NAC domain-containing protein 7 OS=Arabidopsis thaliana OX=3702 GN=NAC007 PE=1 SV=2	S	Function unknown	PREDICTED: NAC domain-containing protein 7-like [Nicotiana sylvestris]	molecular function: binding (GO:0005488);; biological process: biological regulation (GO:0065007);; biological process: developmental process (GO:0032502);; cellular component: cell part (GO:0044464);; biological process: single-organism process (GO:0044699)
Niben101Scf03735g07020	Niben101Scf03735g07020	1.03083	0.864935	0.460852	1.20179	1.20157	1.13126	0.645043	0.726398	1.03825	0.413693	0.1732	0.0792	--	--	--	0.539538	-0.35856	normal	--	--	--	0.006206	1.42643	up	--	--	--	--	--	Biological Process: transcription, DNA-templated (GO:0006351);;	--	--	--	--	No apical meristem (NAM) protein	NAC domain-containing protein 37 OS=Arabidopsis thaliana OX=3702 GN=NAC037 PE=1 SV=1	S	Function unknown	PREDICTED: NAC domain-containing protein 7-like [Nicotiana sylvestris]	biological process: metabolic process (GO:0008152);; biological process: cellular process (GO:0009987)
Niben101Scf01627g02012	Niben101Scf01627g02012	3.91706	4.4896	4.06249	6.36734	9.60992	6.76083	4.38499	5.35189	4.71032	2.56756	2.89956	2.50467	0.937875	-0.03251	normal	0.051022	-0.5309	normal	0.06017	0.468665	normal	8.36e-07	1.02903	up	0.022346	0.488115	normal	--	--	Molecular Function: DNA binding (GO:0003677);; Cellular Component: nucleus (GO:0005634);; Biological Process: regulation of transcription, DNA-templated (GO:0006355);;	--	--	--	--	No apical meristem (NAM) protein	SUPPRESSOR OF GAMMA RESPONSE 1 OS=Arabidopsis thaliana OX=3702 GN=SOG1 PE=1 SV=1	S	Function unknown	PREDICTED: NAC domain-containing protein 8 isoform X2 [Nicotiana sylvestris]	molecular function: binding (GO:0005488);; cellular component: cell (GO:0005623);; cellular component: organelle (GO:0043226);; cellular component: cell part (GO:0044464);; biological process: biological regulation (GO:0065007)
Niben101Scf03169g04009	Niben101Scf03169g04009	0.80584	0.686485	0.468728	5.33131	4.33429	5.32772	1.18728	1.52917	2.36585	0.404269	0.233671	0.559899	0.018105	0.852754	normal	1.23e-05	-1.29578	down	0.658858	0.249269	normal	3.48e-20	2.86952	up	0.000416	1.27811	up	--	--	Molecular Function: DNA binding (GO:0003677);; Molecular Function: protein kinase activity (GO:0004672);; Molecular Function: ATP binding (GO:0005524);; Cellular Component: nucleus (GO:0005634);; Biological Process: protein phosphorylation (GO:0006468);; Cellular Component: integral component of membrane (GO:0016021);; Biological Process: positive regulation of transcription, DNA-templated (GO:00…	--	--	--	--	No apical meristem (NAM) protein	NAC domain-containing protein 73 OS=Arabidopsis thaliana OX=3702 GN=NAC073 PE=2 SV=1	S	Function unknown	PREDICTED: NAC domain-containing protein 8-like [Nicotiana sylvestris]	molecular function: binding (GO:0005488);; biological process: metabolic process (GO:0008152);; biological process: cellular process (GO:0009987);; molecular function: catalytic activity (GO:0003824);; cellular component: cell (GO:0005623);; cellular component: organelle (GO:0043226);; cellular component: cell part (GO:0044464);; cellular component: membrane (GO:0016020);; cellular component: mem…
Niben101Scf00046g02008	Niben101Scf00046g02008	1.72442	2.33681	1.68523	26.4823	20.4085	25.0692	7.02044	5.91591	15.6443	1.31295	2.97884	1.32299	4.3e-08	1.6289	up	0.003346	-1.0569	down	0.988408	-0.0186	normal	6.22e-30	3.03787	up	4.52e-07	1.61226	up	--	--	Molecular Function: DNA binding (GO:0003677);; Cellular Component: nucleus (GO:0005634);; Biological Process: regulation of transcription, DNA-templated (GO:0006355);;	--	--	--	--	No apical meristem (NAM) protein	SUPPRESSOR OF GAMMA RESPONSE 1 OS=Arabidopsis thaliana OX=3702 GN=SOG1 PE=1 SV=1	S	Function unknown	PREDICTED: NAC domain-containing protein 8-like [Nicotiana sylvestris]	molecular function: binding (GO:0005488);; cellular component: cell (GO:0005623);; cellular component: organelle (GO:0043226);; cellular component: cell part (GO:0044464);; biological process: biological regulation (GO:0065007)
Niben101Scf07788g04022	Niben101Scf07788g04022	0.168667	0.14024	0.147513	1.93949	1.57946	1.94294	0.418433	0.424999	0.62565	0.098018	0.123898	0.136736	--	--	--	2.13e-06	-1.51301	down	--	--	--	2.82e-15	2.91456	up	--	--	--	--	--	Molecular Function: DNA binding (GO:0003677);; Cellular Component: nucleus (GO:0005634);; Biological Process: regulation of transcription, DNA-templated (GO:0006355);;	--	--	--	--	No apical meristem (NAM) protein	SUPPRESSOR OF GAMMA RESPONSE 1 OS=Arabidopsis thaliana OX=3702 GN=SOG1 PE=1 SV=1	S	Function unknown	PREDICTED: NAC domain-containing protein 8-like [Nicotiana sylvestris]	molecular function: binding (GO:0005488);; cellular component: cell (GO:0005623);; cellular component: organelle (GO:0043226);; cellular component: cell part (GO:0044464);; biological process: biological regulation (GO:0065007)
Niben101Ctg13774g00001	Niben101Ctg13774g00001	0.593299	0.544026	0.765556	1.00073	1.5036	1.59865	0.592024	0.69912	0.645264	0.32848	0.582187	0.17357	--	--	--	0.067756	-0.78307	normal	--	--	--	0.008185	1.19854	up	--	--	--	--	--	Molecular Function: DNA binding (GO:0003677);; Cellular Component: nucleus (GO:0005634);; Biological Process: regulation of transcription, DNA-templated (GO:0006355);; Biological Process: xylem development (GO:0010089);; Biological Process: regulation of programmed cell death (GO:0043067);; Biological Process: shoot system development (GO:0048367);;	--	--	--	--	No apical meristem (NAM) protein	NAC domain-containing protein 104 OS=Arabidopsis thaliana OX=3702 GN=NAC104 PE=2 SV=1	S	Function unknown	PREDICTED: NAC transcription factor 25 isoform X1 [Nicotiana sylvestris]	molecular function: binding (GO:0005488);; cellular component: cell (GO:0005623);; cellular component: organelle (GO:0043226);; cellular component: cell part (GO:0044464);; biological process: biological regulation (GO:0065007);; biological process: developmental process (GO:0032502);; biological process: multicellular organismal process (GO:0032501);; biological process: single-organism process …
Niben101Scf00193g01009	Niben101Scf00193g01009	1.97304	1.28858	1.8709	0.820549	0.809681	1.07265	2.2994	1.00208	1.35588	1.40982	1.77381	1.74244	0.546913	-0.30146	normal	0.152717	0.669451	normal	0.993549	-0.00967	normal	4.02e-05	-1.19237	down	0.40617	-0.34691	normal	--	--	Molecular Function: DNA binding (GO:0003677);; Cellular Component: nucleus (GO:0005634);; Biological Process: regulation of transcription, DNA-templated (GO:0006355);;	--	--	--	--	No apical meristem (NAM) protein	NAC transcription factor 29 OS=Arabidopsis thaliana OX=3702 GN=NAC029 PE=2 SV=1	K	Transcription	PREDICTED: NAC transcription factor 29-like [Nicotiana tomentosiformis]	molecular function: binding (GO:0005488);; cellular component: cell (GO:0005623);; cellular component: organelle (GO:0043226);; cellular component: cell part (GO:0044464);; biological process: biological regulation (GO:0065007)
Niben101Scf03407g02002	Niben101Scf03407g02002	4.39623	5.14901	7.09004	2.85609	2.2806	2.08216	5.91305	5.30793	3.75644	5.46853	8.28345	8.05165	0.340075	-0.34863	normal	0.00107	0.986981	normal	0.347776	-0.3463	normal	6.49e-16	-1.90662	down	0.000845	-0.7973	normal	--	--	Biological Process: transcription, DNA-templated (GO:0006351);;	--	--	--	--	No apical meristem (NAM) protein	NAC transcription factor 56 OS=Arabidopsis thaliana OX=3702 GN=NAC056 PE=2 SV=1	K	Transcription	PREDICTED: NAC transcription factor 56-like [Nicotiana tabacum]	biological process: metabolic process (GO:0008152);; biological process: cellular process (GO:0009987)
HDZIP
Niben101Scf02279g08003	Niben101Scf02279g08003	5.06398	7.1381	5.61711	10.7425	21.4153	9.15259	6.10926	5.14373	8.07352	3.23076	4.27038	3.72808	0.810172	-0.11455	normal	0.025882	-0.84359	normal	0.168409	0.439326	normal	2.19e-05	1.30731	up	0.172432	0.398757	normal	--	--	Molecular Function: transcription factor activity, sequence-specific DNA binding (GO:0003700);; Cellular Component: nucleus (GO:0005634);; Biological Process: regulation of transcription, DNA-templated (GO:0006355);; Molecular Function: sequence-specific DNA binding (GO:0043565);;	K09338|1.75429e-154|sly:543527|K09338 homeobox-leucine zipper protein | (RefSeq) LEJA1, JA1; jasmonic acid 1	--	[K]	Transcription	Homeobox domain;; Homeobox associated leucine zipper;; Homeobox KN domain	Homeobox-leucine zipper protein ATHB-13 OS=Arabidopsis thaliana OX=3702 GN=ATHB-13 PE=2 SV=2	K	Transcription	PREDICTED: homeobox-leucine zipper protein ATHB-13 [Nicotiana attenuata]	biological process: biological regulation (GO:0065007);; molecular function: nucleic acid binding transcription factor activity (GO:0001071);; cellular component: cell (GO:0005623);; cellular component: organelle (GO:0043226);; cellular component: cell part (GO:0044464);; molecular function: binding (GO:0005488)
Niben101Scf06286g01010	Niben101Scf06286g01010	5.47963	7.94354	5.52609	11.2295	19.3773	9.88115	5.25231	4.36157	9.44758	3.88997	4.35671	5.46228	0.686775	-0.19986	normal	0.031049	-0.83576	normal	0.47272	0.291389	normal	0.000227	1.038	up	0.81961	0.110521	normal	--	--	Molecular Function: transcription factor activity, sequence-specific DNA binding (GO:0003700);; Cellular Component: nucleus (GO:0005634);; Biological Process: regulation of transcription, DNA-templated (GO:0006355);; Molecular Function: sequence-specific DNA binding (GO:0043565);;	K09338|7.10504e-168|sly:543527|K09338 homeobox-leucine zipper protein | (RefSeq) LEJA1, JA1; jasmonic acid 1	--	[K]	Transcription	Homeobox associated leucine zipper;; Homeobox domain	Homeobox-leucine zipper protein ATHB-13 OS=Arabidopsis thaliana OX=3702 GN=ATHB-13 PE=2 SV=2	K	Transcription	PREDICTED: homeobox-leucine zipper protein ATHB-13 [Nicotiana attenuata]	biological process: biological regulation (GO:0065007);; molecular function: nucleic acid binding transcription factor activity (GO:0001071);; cellular component: cell (GO:0005623);; cellular component: organelle (GO:0043226);; cellular component: cell part (GO:0044464);; molecular function: binding (GO:0005488)
Niben101Scf05919g01007	Niben101Scf05919g01007	3.63687	3.87758	3.14872	7.24897	9.33873	7.38427	4.40395	4.3842	5.44204	2.49396	2.56467	2.16122	0.543968	0.16109	normal	0.000983	-0.64549	normal	0.054883	0.419932	normal	9.33e-15	1.2624	up	0.000559	0.607667	normal	--	--	Molecular Function: DNA binding (GO:0003677);; Cellular Component: nucleus (GO:0005634);; Molecular Function: lipid binding (GO:0008289);;	K09338|0|sot:102579068|K09338 homeobox-leucine zipper protein | (RefSeq) homeobox-leucine zipper protein ATHB-14-like	--	--	--	MEKHLA domain;; START domain;; Homeobox domain	Homeobox-leucine zipper protein HOX32 OS=Oryza sativa subsp. japonica OX=39947 GN=HOX32 PE=2 SV=1	K	Transcription	PREDICTED: homeobox-leucine zipper protein ATHB-14-like isoform X1 [Nicotiana attenuata]	molecular function: binding (GO:0005488);; cellular component: cell (GO:0005623);; cellular component: organelle (GO:0043226);; cellular component: cell part (GO:0044464)
Niben101Scf00013g01005	Niben101Scf00013g01005	1.58186	2.00257	1.49122	3.5909	5.0283	3.41317	2.86431	2.81114	2.93314	1.06391	1.34065	1.11176	0.028826	0.480527	normal	0.174398	-0.37845	normal	0.289092	0.355992	normal	6.63e-10	1.2847	up	2.82e-07	0.903286	normal	--	--	Molecular Function: DNA binding (GO:0003677);; Cellular Component: nucleus (GO:0005634);; Molecular Function: lipid binding (GO:0008289);;	K09338|0|sly:101246802|K09338 homeobox-leucine zipper protein | (RefSeq) homeobox-leucine zipper protein ATHB-15	--	--	--	START domain;; MEKHLA domain;; Homeobox domain	Homeobox-leucine zipper protein ATHB-15 OS=Arabidopsis thaliana OX=3702 GN=ATHB-15 PE=1 SV=1	K	Transcription	PREDICTED: homeobox-leucine zipper protein ATHB-15-like [Nicotiana attenuata]	molecular function: binding (GO:0005488);; cellular component: cell (GO:0005623);; cellular component: organelle (GO:0043226);; cellular component: cell part (GO:0044464)
Niben101Scf01611g00004	Niben101Scf01611g00004	1.9464	2.45126	1.60395	4.03059	5.36921	4.24755	3.48367	3.64183	4.01285	1.3587	1.71401	1.30372	0.007201	0.598187	normal	0.476282	-0.20443	normal	0.45049	0.293512	normal	4.81e-10	1.16832	up	4.96e-08	0.958538	normal	--	--	Molecular Function: DNA binding (GO:0003677);; Cellular Component: nucleus (GO:0005634);; Biological Process: positive regulation of cell proliferation (GO:0008284);; Molecular Function: lipid binding (GO:0008289);; Biological Process: primary shoot apical meristem specification (GO:0010072);; Biological Process: xylem development (GO:0010089);; Biological Process: positive regulation of cell dif…	K09338|0|sly:101251205|K09338 homeobox-leucine zipper protein | (RefSeq) homeobox-leucine zipper protein ATHB-15	--	--	--	START domain;; Homeobox domain;; MEKHLA domain	Homeobox-leucine zipper protein ATHB-15 OS=Arabidopsis thaliana OX=3702 GN=ATHB-15 PE=1 SV=1	K	Transcription	PREDICTED: homeobox-leucine zipper protein ATHB-15-like [Nicotiana attenuata]	molecular function: binding (GO:0005488);; cellular component: cell (GO:0005623);; cellular component: organelle (GO:0043226);; cellular component: cell part (GO:0044464);; biological process: biological regulation (GO:0065007);; biological process: reproduction (GO:0000003);; biological process: reproductive process (GO:0022414);; biological process: developmental process (GO:0032502);; biologic…
Niben101Scf00978g00001	Niben101Scf00978g00001	2.16381	2.45608	1.58045	4.75645	6.77344	4.78943	3.69472	2.99142	3.52612	1.07113	1.71616	1.23826	0.089614	0.436687	normal	0.026516	-0.55685	normal	0.217398	0.413272	normal	1.69e-12	1.52137	up	4.21e-06	0.942401	normal	--	--	Molecular Function: DNA binding (GO:0003677);; Cellular Component: nucleus (GO:0005634);; Molecular Function: lipid binding (GO:0008289);; Biological Process: anatomical structure morphogenesis (GO:0009653);; Biological Process: determination of bilateral symmetry (GO:0009855);; Biological Process: meristem development (GO:0048507);; Biological Process: phyllome development (GO:0048827);;	K09338|0|spen:107007265|K09338 homeobox-leucine zipper protein | (RefSeq) homeobox-leucine zipper protein ATHB-15-like	--	--	--	MEKHLA domain;; START domain;; Homeobox domain	Homeobox-leucine zipper protein ATHB-8 OS=Arabidopsis thaliana OX=3702 GN=ATHB-8 PE=1 SV=1	K	Transcription	PREDICTED: homeobox-leucine zipper protein ATHB-15-like [Solanum pennellii]	molecular function: binding (GO:0005488);; cellular component: cell (GO:0005623);; cellular component: organelle (GO:0043226);; cellular component: cell part (GO:0044464);; biological process: developmental process (GO:0032502);; biological process: multicellular organismal process (GO:0032501);; biological process: single-organism process (GO:0044699)
Niben101Scf01374g07001	Niben101Scf01374g07001	2.12643	2.76778	2.22119	5.47181	9.63373	5.04244	3.66921	3.08748	3.93468	1.37574	1.89226	1.79663	0.229738	0.314243	normal	0.01731	-0.74124	normal	0.326684	0.331664	normal	1.25e-08	1.45691	up	0.000511	0.694023	normal	--	--	Molecular Function: DNA binding (GO:0003677);; Cellular Component: nucleus (GO:0005634);; Molecular Function: lipid binding (GO:0008289);;	K09338|0|sot:102580476|K09338 homeobox-leucine zipper protein | (RefSeq) homeobox-leucine zipper protein ATHB-15	--	--	--	START domain;; MEKHLA domain;; Homeobox domain	Homeobox-leucine zipper protein ATHB-15 OS=Arabidopsis thaliana OX=3702 GN=ATHB-15 PE=1 SV=1	K	Transcription	PREDICTED: homeobox-leucine zipper protein ATHB-15-like isoform X1 [Nicotiana attenuata]	molecular function: binding (GO:0005488);; cellular component: cell (GO:0005623);; cellular component: organelle (GO:0043226);; cellular component: cell part (GO:0044464)
Niben101Scf08693g00002	Niben101Scf08693g00002	4.04849	5.05624	3.86274	8.72411	9.80418	9.54823	5.38905	6.56237	6.33543	2.03114	3.2505	3.57067	0.357226	0.235216	normal	0.003026	-0.52531	normal	0.251218	0.37395	normal	2.3e-08	1.18642	up	0.00394	0.657541	normal	--	--	Molecular Function: DNA binding (GO:0003677);; Cellular Component: nucleus (GO:0005634);; Molecular Function: lipid binding (GO:0008289);;	K09338|0|sot:102580476|K09338 homeobox-leucine zipper protein | (RefSeq) homeobox-leucine zipper protein ATHB-15	--	--	--	START domain;; MEKHLA domain;; Homeobox domain	Homeobox-leucine zipper protein ATHB-15 OS=Arabidopsis thaliana OX=3702 GN=ATHB-15 PE=1 SV=1	K	Transcription	PREDICTED: homeobox-leucine zipper protein ATHB-15-like isoform X1 [Nicotiana attenuata]	molecular function: binding (GO:0005488);; cellular component: cell (GO:0005623);; cellular component: organelle (GO:0043226);; cellular component: cell part (GO:0044464)
Niben101Scf08709g00009	Niben101Scf08709g00009	4.66877	2.97792	2.42908	2.38518	1.86236	3.2457	3.85413	3.38691	3.23456	3.74989	3.51899	5.42575	0.766275	-0.15259	normal	0.2498	0.472821	normal	0.581234	-0.27533	normal	0.000838	-1.08411	down	0.064456	-0.55177	normal	--	--	--	K09338|1.44907e-39|jcu:105631553|K09338 homeobox-leucine zipper protein | (RefSeq) homeobox-leucine zipper protein ATHB-15	--	--	--	--	Homeobox-leucine zipper protein ATHB-15 OS=Arabidopsis thaliana OX=3702 GN=ATHB-15 PE=1 SV=1	K	Transcription	PREDICTED: homeobox-leucine zipper protein ATHB-15-like isoform X1 [Nicotiana attenuata]	--
Niben101Scf04240g02010	Niben101Scf04240g02010	7.03059	4.1029	3.40095	5.6746	8.91794	9.33057	5.81782	3.81121	7.09002	1.50029	1.8556	1.85134	0.961823	-0.03258	normal	0.374202	-0.38039	normal	0.000604	0.885934	normal	1.12e-10	1.64788	up	2.2e-05	1.16336	up	--	--	Cellular Component: nucleus (GO:0005634);; Biological Process: regulation of transcription, DNA-templated (GO:0006355);; Molecular Function: sequence-specific DNA binding (GO:0043565);;	K09338|6.91738e-84|spen:107010489|K09338 homeobox-leucine zipper protein | (RefSeq) homeobox-leucine zipper protein ATHB-40	--	[K]	Transcription	Homeobox domain;; Homeobox KN domain	Homeobox-leucine zipper protein ATHB-40 OS=Arabidopsis thaliana OX=3702 GN=ATHB-40 PE=2 SV=3	K	Transcription	PREDICTED: homeobox-leucine zipper protein ATHB-40-like [Nicotiana tabacum]	cellular component: cell (GO:0005623);; cellular component: organelle (GO:0043226);; cellular component: cell part (GO:0044464);; biological process: biological regulation (GO:0065007);; molecular function: binding (GO:0005488)
Niben101Scf01953g01012	Niben101Scf01953g01012	6.80348	4.28606	1.67802	5.68214	5.04076	8.75604	4.03866	3.00826	3.27642	1.7773	2.74033	1.91268	0.42866	-0.38946	normal	0.032019	-0.73532	normal	0.231617	0.467647	normal	0.000244	1.08952	up	0.357676	0.313275	normal	--	--	Molecular Function: transcription factor activity, sequence-specific DNA binding (GO:0003700);; Cellular Component: nucleus (GO:0005634);; Biological Process: regulation of transcription, DNA-templated (GO:0006355);; Molecular Function: sequence-specific DNA binding (GO:0043565);;	--	--	[K]	Transcription	Homeobox domain;; Homeobox associated leucine zipper	Homeobox-leucine zipper protein ATHB-7 OS=Arabidopsis thaliana OX=3702 GN=ATHB-7 PE=1 SV=2	K	Transcription	PREDICTED: homeobox-leucine zipper protein ATHB-7-like [Nicotiana attenuata]	biological process: biological regulation (GO:0065007);; molecular function: nucleic acid binding transcription factor activity (GO:0001071);; cellular component: cell (GO:0005623);; cellular component: organelle (GO:0043226);; cellular component: cell part (GO:0044464);; molecular function: binding (GO:0005488)
Niben101Scf01374g00008	Niben101Scf01374g00008	91.7777	89.4847	95.5217	71.8413	71.7787	53.2808	54.4445	67.7202	70.6326	104.382	99.2325	101.037	2.08e-06	-0.73594	normal	0.943883	0.035412	normal	0.419939	-0.20099	normal	2.85e-08	-1.03123	down	1.89e-10	-0.96626	normal	[J]	Translation, ribosomal structure and biogenesis	Cellular Component: nucleus (GO:0005634);; Biological Process: regulation of transcription, DNA-templated (GO:0006355);; Molecular Function: lipid binding (GO:0008289);; Molecular Function: sequence-specific DNA binding (GO:0043565);;	K09338|1.12571e-56|sot:102591633|K09338 homeobox-leucine zipper protein | (RefSeq) homeobox-leucine zipper protein GLABRA 2	--	--	--	Ribosomal protein S17	Homeobox-leucine zipper protein GLABRA 2 OS=Arabidopsis thaliana OX=3702 GN=GL2 PE=2 SV=3	K	Transcription	PREDICTED: homeobox-leucine zipper protein GLABRA 2 [Nicotiana sylvestris]	cellular component: cell (GO:0005623);; cellular component: organelle (GO:0043226);; cellular component: cell part (GO:0044464);; biological process: biological regulation (GO:0065007);; molecular function: binding (GO:0005488)
Niben101Scf21202g00005	Niben101Scf21202g00005	0.597272	0.656513	0.195112	1.12365	2.55489	2.66164	1.19412	0.763522	1.37329	0.777319	0.83363	0.346565	0.137036	0.658732	normal	0.141228	-0.66929	normal	0.747255	-0.20266	normal	0.008612	1.07586	up	0.482478	0.336481	normal	--	--	Cellular Component: nucleus (GO:0005634);; Biological Process: regulation of transcription, DNA-templated (GO:0006355);; Molecular Function: lipid binding (GO:0008289);; Molecular Function: sequence-specific DNA binding (GO:0043565);;	K09338|0|sot:102591633|K09338 homeobox-leucine zipper protein | (RefSeq) homeobox-leucine zipper protein GLABRA 2	--	--	--	START domain	Homeobox-leucine zipper protein GLABRA 2 OS=Arabidopsis thaliana OX=3702 GN=GL2 PE=2 SV=3	K	Transcription	PREDICTED: homeobox-leucine zipper protein GLABRA 2-like isoform X1 [Nicotiana tomentosiformis]	cellular component: cell (GO:0005623);; cellular component: organelle (GO:0043226);; cellular component: cell part (GO:0044464);; biological process: biological regulation (GO:0065007);; molecular function: binding (GO:0005488)
Niben101Scf02439g00023	Niben101Scf02439g00023	14.2012	5.95725	3.8755	13.9803	12.5544	19.7217	9.81693	7.80343	12.0924	7.23205	4.81959	3.43684	0.937001	0.056414	normal	0.122918	-0.51322	normal	0.824437	0.144458	normal	0.000833	1.04435	up	0.122314	0.50983	normal	--	--	Molecular Function: transcription factor activity, sequence-specific DNA binding (GO:0003700);; Cellular Component: nucleus (GO:0005634);; Biological Process: regulation of transcription, DNA-templated (GO:0006355);; Molecular Function: sequence-specific DNA binding (GO:0043565);;	K09338|3.9448e-146|sot:102597667|K09338 homeobox-leucine zipper protein | (RefSeq) homeobox-leucine zipper protein HAT5	--	[K]	Transcription	Homeobox associated leucine zipper;; Homeobox domain;; Homeobox KN domain	Homeobox-leucine zipper protein HAT5 OS=Arabidopsis thaliana OX=3702 GN=HAT5 PE=1 SV=1	K	Transcription	PREDICTED: homeobox-leucine zipper protein HAT5-like [Nicotiana attenuata]	biological process: biological regulation (GO:0065007);; molecular function: nucleic acid binding transcription factor activity (GO:0001071);; cellular component: cell (GO:0005623);; cellular component: organelle (GO:0043226);; cellular component: cell part (GO:0044464);; molecular function: binding (GO:0005488)
Niben101Scf09847g00006	Niben101Scf09847g00006	0.156926	0.091694	0.227584	0.660042	1.1911	0.510594	0.527668	0.299395	0.391293	0.256678	0.035353	0.225112	--	--	--	0.268887	-0.60814	normal	--	--	--	0.028224	1.20962	up	--	--	--	--	--	Molecular Function: DNA binding (GO:0003677);; Biological Process: cell differentiation (GO:0030154);; Biological Process: anatomical structure development (GO:0048856);; Biological Process: regulation of cellular process (GO:0050794);;	K09338|0|vvi:100261842|K09338 homeobox-leucine zipper protein | (RefSeq) homeobox-leucine zipper protein HDG2	--	--	--	START domain;; Homeobox domain	Homeobox-leucine zipper protein ROC1 OS=Oryza sativa subsp. japonica OX=39947 GN=ROC1 PE=2 SV=1	K	Transcription	PREDICTED: homeobox-leucine zipper protein HDG2-like [Nicotiana sylvestris]	molecular function: binding (GO:0005488);; biological process: cellular process (GO:0009987);; biological process: developmental process (GO:0032502);; biological process: single-organism process (GO:0044699);; biological process: biological regulation (GO:0065007)
